# Supplementary material for: Why an integrated approach between search algorithms and chemical intuition is necessary?
Source: Royal Society of Chemistry journal article supplement (doi:10.1039/d2cp00315e), 2022-01-01
Supplement: d2cp00315e1.pdf [file d2cp00315e1.pdf]

# Supporting information for:

## Why an integrated approach between search algorithms and chemical intuition is necessary?

Venkatesan S. Thimmakondur,<sup>\*,†</sup> Aland Sinjari,<sup>‡</sup> Diego Inostroza,<sup>¶,§</sup> Pothiappan Vairaprakash,<sup>||</sup> Krishnan Thirumoorthy,<sup>⊥</sup> Saikat Roy,<sup>#</sup> Anakuthil Anoop,<sup>\*,#</sup> and William Tiznado<sup>\*,¶</sup>

<sup>†</sup>*Department of Chemistry and Biochemistry, San Diego State University, San Diego, CA 92182-1030, USA.*

<sup>‡</sup>*School of Mathematics, Biological, Exercise & Physical Sciences, San Diego Miramar College, San Diego, CA, 92126-2910, USA.*

<sup>¶</sup>*Computational and Theoretical Chemistry Group, Departamento de Ciencias Químicas, Facultad de Ciencias Exactas, Universidad Andres Bello, República 498, Santiago, Chile.*

<sup>§</sup>*Universidad Andres Bello, Programa de Doctorado en Fisicoquímica Molecular, Facultad de Ciencias Exactas, Santiago, Chile.*

<sup>||</sup>*Department of Chemistry, School of Chemical and Biotechnology, SASTRA Deemed University, Thanjavur 613 401, Tamil Nadu, India.*

<sup>⊥</sup>*Department of Chemistry, School of Advanced Sciences, Vellore Institute of Technology, Vellore - 632 014, Tamil Nadu, India.*

<sup>#</sup>*Department of Chemistry, Indian Institute of Technology Kharagpur, Kharagpur 721 302, West Bengal, India.*

E-mail: vthimmakondusamy@sdsu.edu; anoop@chem.iitkgp.ac.in; wtiznado@unab.cl

# Contents

|                 |    |
|-----------------|----|
| List of Figures | S2 |
|-----------------|----|

|                |    |
|----------------|----|
| List of Tables | S4 |
|----------------|----|

## List of Figures

|    |                                                                                                                                                                                                                                                                                                                        |     |
|----|------------------------------------------------------------------------------------------------------------------------------------------------------------------------------------------------------------------------------------------------------------------------------------------------------------------------|-----|
| S1 | Valence structures and IUPAC names of isomers <b>1</b> to <b>6</b> of $C_{12}O_2Mg_2$ . . . . .                                                                                                                                                                                                                        | S8  |
| S2 | Valence structures and IUPAC names of isomers <b>7</b> to <b>12</b> of $C_{12}O_2Mg_2$ . . . . .                                                                                                                                                                                                                       | S9  |
| S3 | Valence structures and IUPAC names of isomers <b>13</b> to <b>18</b> of $C_{12}O_2Mg_2$ . . . . .                                                                                                                                                                                                                      | S10 |
| S4 | Valence structures and IUPAC names of isomers <b>19</b> to <b>24</b> of $C_{12}O_2Mg_2$ . . . . .                                                                                                                                                                                                                      | S11 |
| S5 | Valence structures and IUPAC names of isomers <b>25</b> to <b>30</b> of $C_{12}O_2Mg_2$ . . . . .                                                                                                                                                                                                                      | S12 |
| S6 | Valence structures and IUPAC names of isomers <b>31</b> to <b>36</b> of $C_{12}O_2Mg_2$ . . . . .                                                                                                                                                                                                                      | S13 |
| S7 | Isomers <b>37-51</b> of $C_{12}O_2Mg_2$ considered on the singlet PES. Relative energies including ZPVE corrections (in kcal mol <sup>-1</sup> ) are calculated at the PBE0-D3/def2-TZVP level. Isomers identified by chemical intuition are marked with an asterisk whereas unmarked ones are from AUTOMATON. . . . . | S16 |
| S8 | Isomers <b>52-67</b> of $C_{12}O_2Mg_2$ considered on the singlet PES. Relative energies including ZPVE corrections (in kcal mol <sup>-1</sup> ) are calculated at the PBE0-D3/def2-TZVP level. Isomers identified by chemical intuition are marked with an asterisk whereas unmarked ones are from AUTOMATON. . . . . | S18 |
| S9 | Isomers <b>68-85</b> of $C_{12}O_2Mg_2$ considered on the singlet PES. Relative energies including ZPVE corrections (in kcal mol <sup>-1</sup> ) are calculated at the PBE0-D3/def2-TZVP level. Isomers identified by chemical intuition are marked with an asterisk whereas unmarked ones are from AUTOMATON. . . . . | S20 |

|     |                                                                                                                                                                                                                                                                                                                          |     |
|-----|--------------------------------------------------------------------------------------------------------------------------------------------------------------------------------------------------------------------------------------------------------------------------------------------------------------------------|-----|
| S10 | Isomers <b>86-103</b> of $C_{12}O_2Mg_2$ considered on the singlet PES. Relative energies including ZPVE corrections (in kcal mol <sup>-1</sup> ) are calculated at the PBE0-D3/def2-TZVP level. Isomers identified by chemical intuition are marked with an asterisk whereas unmarked ones are from AUTOMATON. . . . .  | S22 |
| S11 | Isomers <b>104-123</b> of $C_{12}O_2Mg_2$ considered on the singlet PES. Relative energies including ZPVE corrections (in kcal mol <sup>-1</sup> ) are calculated at the PBE0-D3/def2-TZVP level. Isomers identified by chemical intuition are marked with an asterisk whereas unmarked ones are from AUTOMATON. . . . . | S24 |
| S12 | Isomers <b>124-143</b> of $C_{12}O_2Mg_2$ considered on the singlet PES. Relative energies including ZPVE corrections (in kcal mol <sup>-1</sup> ) are calculated at the PBE0-D3/def2-TZVP level. Isomers identified by chemical intuition are marked with an asterisk whereas unmarked ones are from AUTOMATON. . . . . | S26 |
| S13 | Isomers <b>144-161</b> of $C_{12}O_2Mg_2$ considered on the singlet PES. Relative energies including ZPVE corrections (in kcal mol <sup>-1</sup> ) are calculated at the PBE0-D3/def2-TZVP level. Isomers identified by chemical intuition are marked with an asterisk whereas unmarked ones are from AUTOMATON. . . . . | S28 |
| S14 | Isomers <b>162-164</b> of $C_{12}O_2Mg_2$ considered on the singlet PES. Relative energies including ZPVE corrections (in kcal mol <sup>-1</sup> ) are calculated at the PBE0-D3/def2-TZVP level. Isomers identified by chemical intuition are marked with an asterisk whereas unmarked ones are from AUTOMATON. . . . . | S30 |

## List of Tables

- S1 Total energy ( $E$ ), zero-point vibrational energy ( $ZPVE$ ),  $ZPVE$ -corrected total energy ( $E+ZPVE$ ), thermal correction to Gibbs free energy ( $G$ ), sum of electronic and thermal Free energies ( $E + G$ ), net dipole moment ( $\mu$ ), relative energy without  $ZPVE$ -correction ( $\Delta E_e$ ),  $ZPVE$ -corrected relative energy ( $\Delta E_0$ ), and number of imaginary frequencies of  $C_{12}O_2Mg_2$  isomers (**1-36**) in their respective singlet ground electronic states calculated at the PBE0-D3/def2-TZVP level of theory. . . . . S14
- S2 Total energy ( $E$ ), zero-point vibrational energy ( $ZPVE$ ),  $ZPVE$ -corrected total energy ( $E+ZPVE$ ), thermal correction to Gibbs free energy ( $G$ ), sum of electronic and thermal Free energies ( $E + G$ ), net dipole moment ( $\mu$ ), relative energy without  $ZPVE$ -correction ( $\Delta E_e$ ),  $ZPVE$ -corrected relative energy ( $\Delta E_0$ ), number of imaginary frequencies, and  $\langle S^2 \rangle$  values of  $C_{12}O_2Mg_2$  isomers (**1-36**) in their respective triplet ground electronic states calculated at the PBE0-D3/def2-TZVP level of theory. . . . . S15
- S3 Total energy ( $E$ ), zero-point vibrational energy ( $ZPVE$ ),  $ZPVE$ -corrected total energy ( $E+ZPVE$ ), thermal correction to Gibbs free energy ( $G$ ), sum of electronic and thermal Free energies ( $E + G$ ), net dipole moment ( $\mu$ ), relative energy without  $ZPVE$ -correction ( $\Delta E_e$ ),  $ZPVE$ -corrected relative energy ( $\Delta E_0$ ), and number of imaginary frequencies of  $C_{12}O_2Mg_2$  isomers (**37-51**) in their respective singlet ground electronic states calculated at the PBE0-D3/def2-TZVP level of theory. . . . . S17

|    |                                                                                                                                                                                                                                                                                                                                                                                                                                                                                                                                                                         |     |
|----|-------------------------------------------------------------------------------------------------------------------------------------------------------------------------------------------------------------------------------------------------------------------------------------------------------------------------------------------------------------------------------------------------------------------------------------------------------------------------------------------------------------------------------------------------------------------------|-----|
| S4 | Total energy ( $E$ ), zero-point vibrational energy ( $ZPVE$ ), $ZPVE$ -corrected total energy ( $E+ZPVE$ ), thermal correction to Gibbs free energy ( $G$ ), sum of electronic and thermal Free energies ( $E + G$ ), net dipole moment ( $\mu$ ), relative energy without $ZPVE$ -correction ( $\Delta E_e$ ), $ZPVE$ -corrected relative energy ( $\Delta E_0$ ), and number of imaginary frequencies of $C_{12}O_2Mg_2$ isomers ( <b>52-67</b> ) in their respective singlet ground electronic states calculated at the PBE0-D3/def2-TZVP level of theory. . . . .  | S19 |
| S5 | Total energy ( $E$ ), zero-point vibrational energy ( $ZPVE$ ), $ZPVE$ -corrected total energy ( $E+ZPVE$ ), thermal correction to Gibbs free energy ( $G$ ), sum of electronic and thermal Free energies ( $E + G$ ), net dipole moment ( $\mu$ ), relative energy without $ZPVE$ -correction ( $\Delta E_e$ ), $ZPVE$ -corrected relative energy ( $\Delta E_0$ ), and number of imaginary frequencies of $C_{12}O_2Mg_2$ isomers ( <b>68-85</b> ) in their respective singlet ground electronic states calculated at the PBE0-D3/def2-TZVP level of theory. . . . .  | S21 |
| S6 | Total energy ( $E$ ), zero-point vibrational energy ( $ZPVE$ ), $ZPVE$ -corrected total energy ( $E+ZPVE$ ), thermal correction to Gibbs free energy ( $G$ ), sum of electronic and thermal Free energies ( $E + G$ ), net dipole moment ( $\mu$ ), relative energy without $ZPVE$ -correction ( $\Delta E_e$ ), $ZPVE$ -corrected relative energy ( $\Delta E_0$ ), and number of imaginary frequencies of $C_{12}O_2Mg_2$ isomers ( <b>86-103</b> ) in their respective singlet ground electronic states calculated at the PBE0-D3/def2-TZVP level of theory. . . . . | S23 |

|    |                                                                                                                                                                                                                                                                                                                                                                                                                                                                                                                                                                          |     |
|----|--------------------------------------------------------------------------------------------------------------------------------------------------------------------------------------------------------------------------------------------------------------------------------------------------------------------------------------------------------------------------------------------------------------------------------------------------------------------------------------------------------------------------------------------------------------------------|-----|
| S7 | Total energy ( $E$ ), zero-point vibrational energy ( $ZPVE$ ), $ZPVE$ -corrected total energy ( $E+ZPVE$ ), thermal correction to Gibbs free energy ( $G$ ), sum of electronic and thermal Free energies ( $E + G$ ), net dipole moment ( $\mu$ ), relative energy without $ZPVE$ -correction ( $\Delta E_e$ ), $ZPVE$ -corrected relative energy ( $\Delta E_0$ ), and number of imaginary frequencies of $C_{12}O_2Mg_2$ isomers ( <b>104-123</b> ) in their respective singlet ground electronic states calculated at the PBE0-D3/def2-TZVP level of theory. . . . . | S25 |
| S8 | Total energy ( $E$ ), zero-point vibrational energy ( $ZPVE$ ), $ZPVE$ -corrected total energy ( $E+ZPVE$ ), thermal correction to Gibbs free energy ( $G$ ), sum of electronic and thermal Free energies ( $E + G$ ), net dipole moment ( $\mu$ ), relative energy without $ZPVE$ -correction ( $\Delta E_e$ ), $ZPVE$ -corrected relative energy ( $\Delta E_0$ ), and number of imaginary frequencies of $C_{12}O_2Mg_2$ isomers ( <b>124-143</b> ) in their respective singlet ground electronic states calculated at the PBE0-D3/def2-TZVP level of theory. . . . . | S27 |
| S9 | Total energy ( $E$ ), zero-point vibrational energy ( $ZPVE$ ), $ZPVE$ -corrected total energy ( $E+ZPVE$ ), thermal correction to Gibbs free energy ( $G$ ), sum of electronic and thermal Free energies ( $E + G$ ), net dipole moment ( $\mu$ ), relative energy without $ZPVE$ -correction ( $\Delta E_e$ ), $ZPVE$ -corrected relative energy ( $\Delta E_0$ ), and number of imaginary frequencies of $C_{12}O_2Mg_2$ isomers ( <b>144-161</b> ) in their respective singlet ground electronic states calculated at the PBE0-D3/def2-TZVP level of theory. . . . . | S29 |

|     |                                                                                                                                                                                                                                                                                                                                                                                                                                                                                                                                                                          |     |
|-----|--------------------------------------------------------------------------------------------------------------------------------------------------------------------------------------------------------------------------------------------------------------------------------------------------------------------------------------------------------------------------------------------------------------------------------------------------------------------------------------------------------------------------------------------------------------------------|-----|
| S10 | Total energy ( $E$ ), zero-point vibrational energy ( $ZPVE$ ), $ZPVE$ -corrected total energy ( $E+ZPVE$ ), thermal correction to Gibbs free energy ( $G$ ), sum of electronic and thermal Free energies ( $E + G$ ), net dipole moment ( $\mu$ ), relative energy without $ZPVE$ -correction ( $\Delta E_e$ ), $ZPVE$ -corrected relative energy ( $\Delta E_0$ ), and number of imaginary frequencies of $C_{12}O_2Mg_2$ isomers ( <b>162-164</b> ) in their respective singlet ground electronic states calculated at the PBE0-D3/def2-TZVP level of theory. . . . . | S31 |
|-----|--------------------------------------------------------------------------------------------------------------------------------------------------------------------------------------------------------------------------------------------------------------------------------------------------------------------------------------------------------------------------------------------------------------------------------------------------------------------------------------------------------------------------------------------------------------------------|-----|

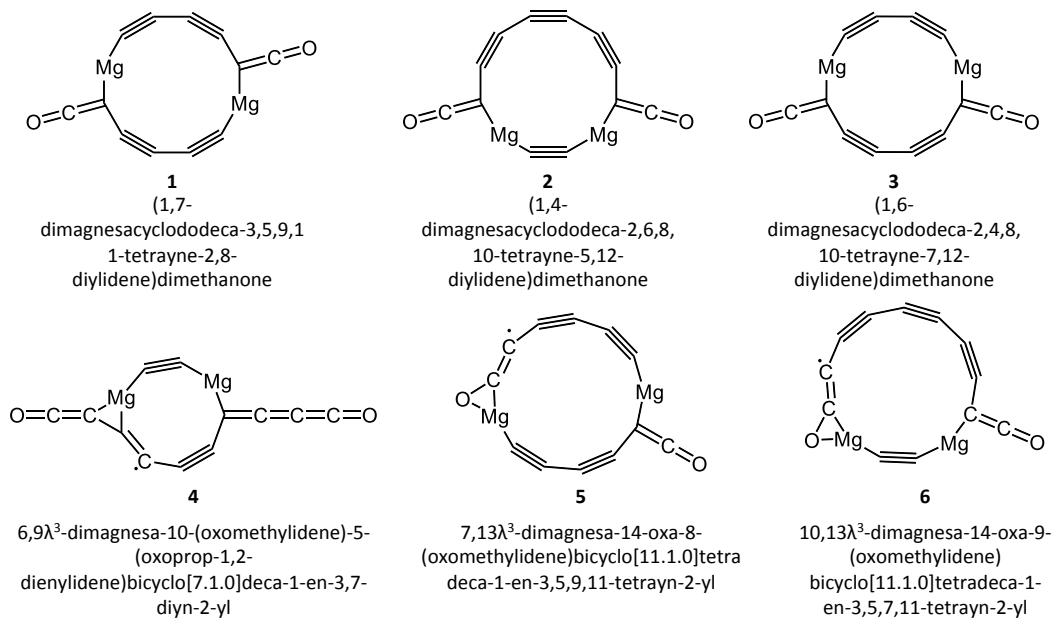

Figure S1: Valence structures and IUPAC names of isomers **1** to **6** of  $C_{12}O_2Mg_2$ .



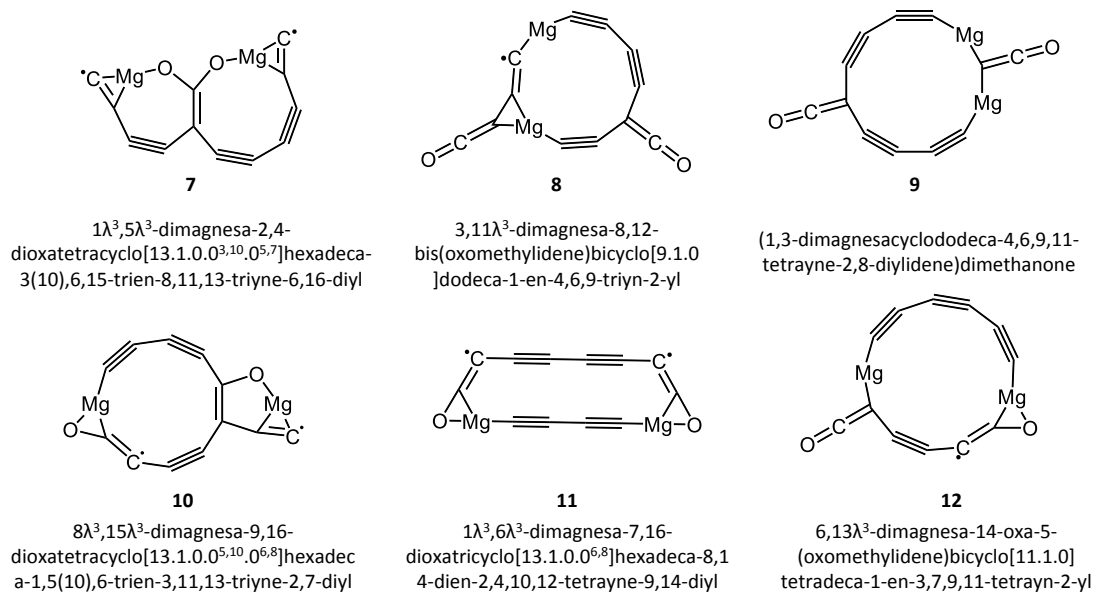

Figure S2: Valence structures and IUPAC names of isomers **7** to **12** of  $C_{12}O_2Mg_2$ .

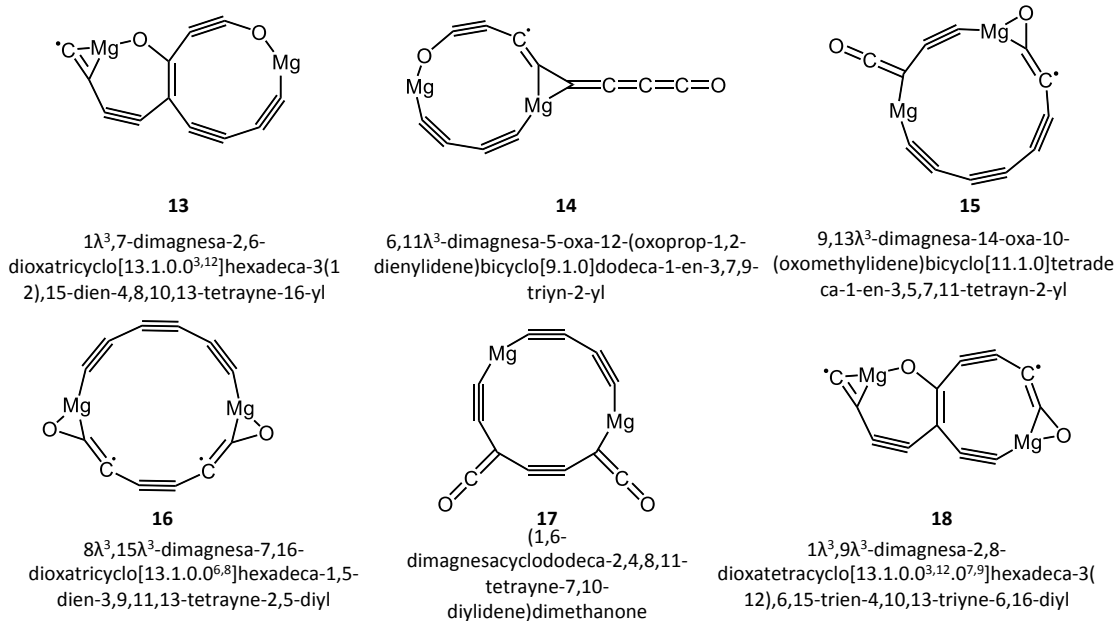

Figure S3: Valence structures and IUPAC names of isomers **13** to **18** of  $C_{12}O_2Mg_2$ .

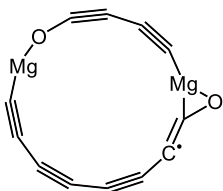

**19**

9,15 $\lambda^3$ -dimagnesa-10,16-dioxabicyclo[13.1.0]hexadeca-1-en-3,5,7,11,13-pentayn-2-yl

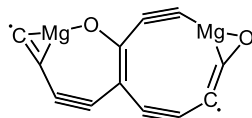

**20**

1 $\lambda^3$ ,6 $\lambda^3$ -dimagnesa-2,7-dioxatetracyclo[13.1.0.0<sup>3,12</sup>,0<sup>6,8</sup>]hexadeca-3(12),8,15-trien-4,10,13-triyn-9,16-diyl

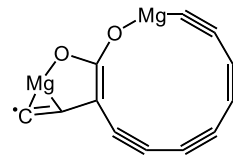

**21**

1 $\lambda^3$ ,5-dimagnesa-2,4-dioxatricyclo[13.1.0.0<sup>3,14</sup>]hexadeca-3(14),15-dien-6,8,10,12-tetrayne-16-yl

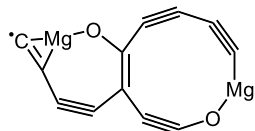

**22**

1 $\lambda^3$ ,8-dimagnesa-2,9-dioxatricyclo[13.1.0.0<sup>3,12</sup>]hexadeca-3(12),15-dien-4,6,10,13-tetrayne-16-yl

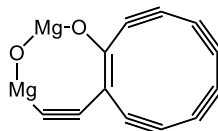

**23**

12,14-dimagnesa-11,13-dioxabicyclo[8.6.0]hexadeca-2,4,6,8,15-pentayn-1(10)-ene

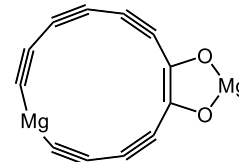

**24**

6,15-dimagnesa-14,16-dioxabicyclo[11.3.0]hexadeca-2,4,7,9,11-pentayn-1(13)-ene

Figure S4: Valence structures and IUPAC names of isomers **19** to **24** of  $C_{12}O_2Mg_2$ .

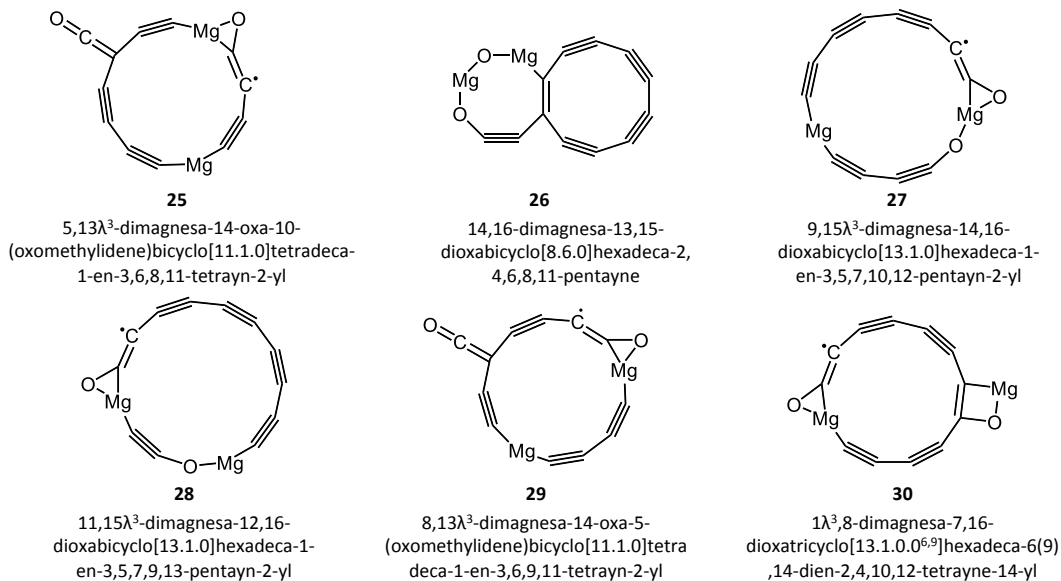

Figure S5: Valence structures and IUPAC names of isomers **25** to **30** of  $C_{12}O_2Mg_2$ .

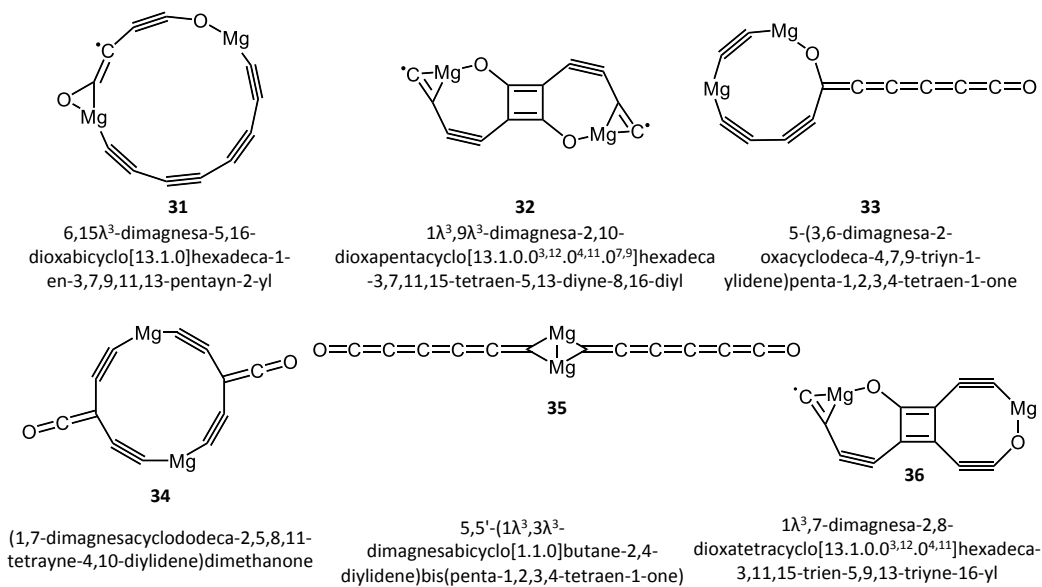

Figure S6: Valence structures and IUPAC names of isomers **31** to **36** of  $C_{12}O_2Mg_2$ .

Table S1: Total energy ( $E$ ), zero-point vibrational energy ( $ZPVE$ ),  $ZPVE$ -corrected total energy ( $E+ZPVE$ ), thermal correction to Gibbs free energy ( $G$ ), sum of electronic and thermal Free energies ( $E + G$ ), net dipole moment ( $\mu$ ), relative energy without  $ZPVE$ -correction ( $\Delta E_e$ ),  $ZPVE$ -corrected relative energy ( $\Delta E_0$ ), and number of imaginary frequencies of  $C_{12}O_2Mg_2$  isomers (**1-36**) in their respective singlet ground electronic states calculated at the PBE0-D3/def2-TZVP level of theory.

| Isomer | $E$          | $ZPVE$   | $E+ZPVE$     | $G$      | $E + G$      | $\mu$ | $\Delta E_e$           | $\Delta E_0$ | $\Delta G$ | NImag |
|--------|--------------|----------|--------------|----------|--------------|-------|------------------------|--------------|------------|-------|
|        | a.u          |          |              |          |              | Debye | kcal mol <sup>-1</sup> |              |            |       |
| 1      | -1006.958624 | 0.067910 | -1006.890715 | 0.021570 | -1006.937054 | 0.02  | 0.00                   | 0.00         | 0.00       | 0     |
| 2      | -1006.955368 | 0.067265 | -1006.888103 | 0.020714 | -1006.934654 | 1.62  | 2.04                   | 1.64         | 1.51       | 0     |
| 3      | -1006.950734 | 0.067518 | -1006.883216 | 0.020106 | -1006.930628 | 1.03  | 4.95                   | 4.71         | 4.03       | 0     |
| 4      | -1006.943620 | 0.066778 | -1006.876842 | 0.019104 | -1006.924516 | 3.91  | 9.42                   | 8.70         | 7.87       | 0     |
| 5      | -1006.939033 | 0.067417 | -1006.871616 | 0.021172 | -1006.917861 | 2.27  | 12.29                  | 11.98        | 12.04      | 0     |
| 6      | -1006.934599 | 0.066874 | -1006.867725 | 0.021026 | -1006.913573 | 3.11  | 15.08                  | 14.43        | 14.73      | 0     |
| 7      | -1006.929617 | 0.069054 | -1006.860563 | 0.026048 | -1006.903569 | 1.76  | 18.20                  | 18.92        | 21.01      | 0     |
| 8      | -1006.928290 | 0.067860 | -1006.860430 | 0.021252 | -1006.907038 | 0.19  | 19.03                  | 19.00        | 18.84      | 0     |
| 9      | -1006.928271 | 0.068145 | -1006.860126 | 0.020832 | -1006.907439 | 0.75  | 19.05                  | 19.19        | 18.58      | 0     |
| 10     | -1006.928890 | 0.069810 | -1006.859079 | 0.027351 | -1006.901539 | 5.88  | 18.66                  | 19.85        | 22.29      | 0     |
| 11     | -1006.926160 | 0.067137 | -1006.859023 | 0.021903 | -1006.904257 | 2.77  | 20.37                  | 19.89        | 20.58      | 0     |
| 12     | -1006.925604 | 0.066895 | -1006.858710 | 0.018242 | -1006.907362 | 0.58  | 20.72                  | 20.08        | 18.63      | 0     |
| 13     | -1006.927838 | 0.069822 | -1006.858015 | 0.027492 | -1006.900346 | 6.01  | 19.32                  | 20.52        | 23.03      | 0     |
| 14     | -1006.924885 | 0.066875 | -1006.858010 | 0.019457 | -1006.905428 | 6.86  | 21.17                  | 20.52        | 19.85      | 0     |
| 15     | -1006.925134 | 0.067186 | -1006.857948 | 0.020446 | -1006.904688 | 2.49  | 21.02                  | 20.56        | 20.31      | 0     |
| 16     | -1006.921186 | 0.066793 | -1006.854393 | 0.019878 | -1006.901308 | 0.25  | 23.49                  | 22.79        | 22.43      | 0     |
| 17     | -1006.921702 | 0.067410 | -1006.854292 | 0.019267 | -1006.902435 | 2.23  | 23.17                  | 22.86        | 21.72      | 0     |
| 18     | -1006.923853 | 0.069692 | -1006.854161 | 0.027368 | -1006.896485 | 3.06  | 21.82                  | 22.94        | 25.46      | 0     |
| 19     | -1006.919851 | 0.067075 | -1006.852775 | 0.020496 | -1006.899355 | 1.67  | 24.33                  | 23.81        | 23.66      | 0     |
| 20     | -1006.921028 | 0.069597 | -1006.851430 | 0.027413 | -1006.893615 | 4.57  | 23.59                  | 24.65        | 27.26      | 0     |
| 21     | -1006.919053 | 0.069476 | -1006.849577 | 0.026097 | -1006.892956 | 9.20  | 24.83                  | 25.81        | 27.67      | 0     |
| 22     | -1006.917899 | 0.069362 | -1006.848537 | 0.026732 | -1006.891167 | 2.65  | 25.56                  | 26.47        | 28.79      | 0     |
| 23     | -1006.918011 | 0.069680 | -1006.848331 | 0.028095 | -1006.889916 | 9.57  | 25.49                  | 26.60        | 29.58      | 0     |
| 24     | -1006.917084 | 0.069120 | -1006.847964 | 0.026449 | -1006.890635 | 8.62  | 26.07                  | 26.83        | 29.13      | 0     |
| 25     | -1006.911137 | 0.067377 | -1006.843760 | 0.020944 | -1006.890193 | 1.30  | 29.80                  | 29.46        | 29.41      | 0     |
| 26     | -1006.915333 | 0.069231 | -1006.846102 | 0.027298 | -1006.888035 | 11.75 | 27.17                  | 27.99        | 30.76      | 0     |
| 27     | -1006.912947 | 0.067030 | -1006.845917 | 0.020952 | -1006.891995 | 4.04  | 28.66                  | 28.11        | 28.27      | 0     |
| 28     | -1006.910815 | 0.066970 | -1006.843845 | 0.020502 | -1006.890313 | 3.53  | 30.00                  | 29.41        | 29.33      | 0     |
| 29     | -1006.910852 | 0.067260 | -1006.843592 | 0.020512 | -1006.890340 | 0.56  | 29.98                  | 29.57        | 29.31      | 0     |
| 30     | -1006.911179 | 0.068971 | -1006.842208 | 0.026116 | -1006.885063 | 6.66  | 29.77                  | 30.44        | 32.62      | 0     |
| 31     | -1006.904427 | 0.066789 | -1006.837638 | 0.020661 | -1006.883766 | 1.70  | 34.01                  | 33.31        | 33.44      | 0     |
| 32     | -1006.906485 | 0.069327 | -1006.837158 | 0.027007 | -1006.879478 | 0.00  | 32.72                  | 33.61        | 36.13      | 0     |
| 33     | -1006.901879 | 0.066370 | -1006.835509 | 0.019374 | -1006.882505 | 3.53  | 35.61                  | 34.64        | 34.23      | 0     |
| 34     | -1006.901132 | 0.067518 | -1006.833614 | 0.018921 | -1006.882211 | 0.00  | 36.08                  | 35.83        | 34.41      | 0     |
| 35     | -1006.899786 | 0.067750 | -1006.832036 | 0.017442 | -1006.882344 | 0.01  | 36.92                  | 36.82        | 34.33      | 0     |
| 36     | -1006.896847 | 0.069595 | -1006.827252 | 0.027287 | -1006.869560 | 4.75  | 38.77                  | 39.82        | 42.35      | 0     |

Table S2: Total energy ( $E$ ), zero-point vibrational energy ( $ZPVE$ ),  $ZPVE$ -corrected total energy ( $E+ZPVE$ ), thermal correction to Gibbs free energy ( $G$ ), sum of electronic and thermal Free energies ( $E + G$ ), net dipole moment ( $\mu$ ), relative energy without  $ZPVE$ -correction ( $\Delta E_e$ ),  $ZPVE$ -corrected relative energy ( $\Delta E_0$ ), number of imaginary frequencies, and  $\langle S^2 \rangle$  values of  $C_{12}O_2Mg_2$  isomers (**1-36**) in their respective triplet ground electronic states calculated at the PBE0-D3/def2-TZVP level of theory.

| Isomer | $E$          | $ZPVE$   | $E+ZPVE$     | $G$      | $E + G$      | $\mu$ | $\Delta E_e$           | $\Delta E_0$ | $\Delta G$ | NImag | $\langle S^2 \rangle$ |
|--------|--------------|----------|--------------|----------|--------------|-------|------------------------|--------------|------------|-------|-----------------------|
|        | a.u.         |          |              |          |              | Debye | kcal mol <sup>-1</sup> |              |            |       |                       |
| 1      | -1006.883654 | 0.065661 | -1006.817993 | 0.018199 | -1006.865455 | 1.85  | 24.97                  | 22.89        | 20.73      | 0     | 2.032921              |
| 2      | -1006.898275 | 0.064325 | -1006.833950 | 0.016328 | -1006.881947 | 0.55  | 15.80                  | 12.88        | 10.38      | 0     | 2.057857              |
| 3      | -1006.889563 | 0.065777 | -1006.823786 | 0.018063 | -1006.871500 | 3.47  | 21.27                  | 19.26        | 16.94      | 0     | 2.021401              |
| 4      | -1006.890796 | 0.063946 | -1006.826850 | 0.015777 | -1006.875019 | 3.54  | 20.49                  | 17.34        | 14.73      | 0     | 2.065170              |
| 5      | -1006.880576 | 0.064921 | -1006.815655 | 0.017047 | -1006.863529 | 1.24  | 26.91                  | 24.36        | 21.94      | 0     | 2.054023              |
| 6      | -1006.877117 | 0.063916 | -1006.813202 | 0.017035 | -1006.860082 | 2.69  | 29.08                  | 25.90        | 24.10      | 0     | 2.063486              |
| 7      | -1006.887976 | 0.067435 | -1006.820540 | 0.024316 | -1006.863660 | 5.79  | 22.26                  | 21.30        | 21.86      | 0     | 2.056077              |
| 8      | -1006.877275 | 0.065634 | -1006.811641 | 0.017925 | -1006.859350 | 4.18  | 28.98                  | 26.88        | 24.56      | 0     | 2.041428              |
| 9      | -1006.879589 | 0.065835 | -1006.813755 | 0.017538 | -1006.862051 | 5.43  | 27.53                  | 25.55        | 22.87      | 0     | 2.051841              |
| 10     | -1006.888186 | 0.068158 | -1006.820028 | 0.023381 | -1006.864805 | 8.36  | 22.13                  | 21.62        | 21.14      | 0     | 2.020079              |
| 11     | -1006.873802 | 0.064607 | -1006.809195 | 0.018132 | -1006.855670 | 2.45  | 31.16                  | 28.42        | 26.87      | 0     | 2.059230              |
| 12     | -1006.871304 | 0.065096 | -1006.806208 | 0.018223 | -1006.853081 | 4.11  | 32.72                  | 30.29        | 28.50      | 0     | 2.029518              |
| 13     | -1006.877620 | 0.067940 | -1006.809679 | 0.022969 | -1006.854651 | 5.60  | 28.76                  | 28.11        | 27.51      | 0     | 2.042444              |
| 14     | -1006.864381 | 0.064330 | -1006.800051 | 0.015951 | -1006.848430 | 7.63  | 37.07                  | 34.15        | 31.42      | 0     | 2.040736              |
| 15     | -1006.872430 | 0.064734 | -1006.807696 | 0.016758 | -1006.855672 | 2.17  | 32.02                  | 29.36        | 26.87      | 0     | 2.058280              |
| 16     | -1006.835602 | 0.064267 | -1006.771335 | 0.016533 | -1006.819069 | 0.20  | 55.13                  | 52.17        | 49.84      | 0     | 2.047893              |
| 17     | -1006.877934 | 0.065614 | -1006.812319 | 0.017919 | -1006.860015 | 1.90  | 28.56                  | 26.45        | 24.15      | 0     | 2.029866              |
| 18     | -1006.865625 | 0.065892 | -1006.799734 | 0.022941 | -1006.842684 | 1.56  | 36.29                  | 34.35        | 35.02      | 1     | 2.064198              |
| 19     | -1006.864317 | 0.064125 | -1006.800192 | 0.016664 | -1006.847653 | 0.83  | 37.11                  | 34.06        | 31.90      | 0     | 2.076429              |
| 20     | -1006.865778 | 0.066551 | -1006.799227 | 0.023622 | -1006.842156 | 4.52  | 36.19                  | 34.67        | 35.35      | 1     | 2.055704              |
| 21     | -1006.888911 | 0.067492 | -1006.821419 | 0.022335 | -1006.866576 | 4.56  | 21.68                  | 20.74        | 20.03      | 0     | 2.067834              |
| 22     | -1006.871713 | 0.066812 | -1006.804901 | 0.022464 | -1006.849249 | 3.66  | 32.47                  | 31.11        | 30.90      | 0     | 2.057749              |
| 23     | -1006.885390 | 0.067942 | -1006.817448 | 0.025436 | -1006.859954 | 8.90  | 23.89                  | 23.24        | 24.18      | 0     | 2.097674              |
| 24     | -1006.923454 | 0.068976 | -1006.854478 | 0.024959 | -1006.898495 | 3.20  | 0.00                   | 0.00         | 0.00       | 0     | 2.025295              |
| 25     | -1006.860490 | 0.065077 | -1006.795413 | 0.017611 | -1006.842879 | 4.00  | 39.51                  | 37.06        | 34.90      | 0     | 2.043746              |
| 26     | -1006.870568 | 0.067049 | -1006.803519 | 0.023726 | -1006.846842 | 10.96 | 33.19                  | 31.98        | 32.41      | 0     | 2.109208              |
| 27     | -1006.868009 | 0.064765 | -1006.803245 | 0.017721 | -1006.850288 | 1.65  | 34.79                  | 32.15        | 30.25      | 0     | 2.063849              |
| 28     | -1006.856046 | 0.063873 | -1006.792172 | 0.016148 | -1006.839898 | 1.84  | 42.30                  | 39.10        | 36.77      | 0     | 2.091083              |
| 29     | -1006.863183 | 0.065162 | -1006.798021 | 0.017397 | -1006.845786 | 4.63  | 37.82                  | 35.43        | 33.08      | 0     | 2.036084              |
| 30     | -1006.898970 | 0.067735 | -1006.831235 | 0.023139 | -1006.875831 | 3.79  | 15.36                  | 14.59        | 14.22      | 0     | 2.042510              |
| 31     | -1006.831678 | 0.063794 | -1006.767883 | 0.015227 | -1006.816451 | 2.07  | 57.59                  | 54.34        | 51.48      | 0     | 2.044141              |
| 32     | -1006.873299 | 0.068051 | -1006.805248 | 0.023488 | -1006.849811 | 7.74  | 31.47                  | 30.89        | 30.55      | 0     | 2.053382              |
| 33     | -1006.883379 | 0.064667 | -1006.818711 | 0.016212 | -1006.867167 | 6.31  | 25.15                  | 22.44        | 19.66      | 0     | 2.046610              |
| 34     | -1006.849211 | 0.065501 | -1006.783711 | 0.016129 | -1006.833082 | 3.55  | 46.59                  | 44.41        | 41.05      | 0     | 2.031833              |
| 35     | -1006.861653 | 0.065459 | -1006.796194 | 0.013309 | -1006.848344 | 4.95  | 38.78                  | 36.57        | 31.47      | 0     | 2.037372              |
| 36     | -1006.877779 | 0.067716 | -1006.810063 | 0.024170 | -1006.853609 | 2.99  | 28.66                  | 27.87        | 28.17      | 0     | 2.041732              |

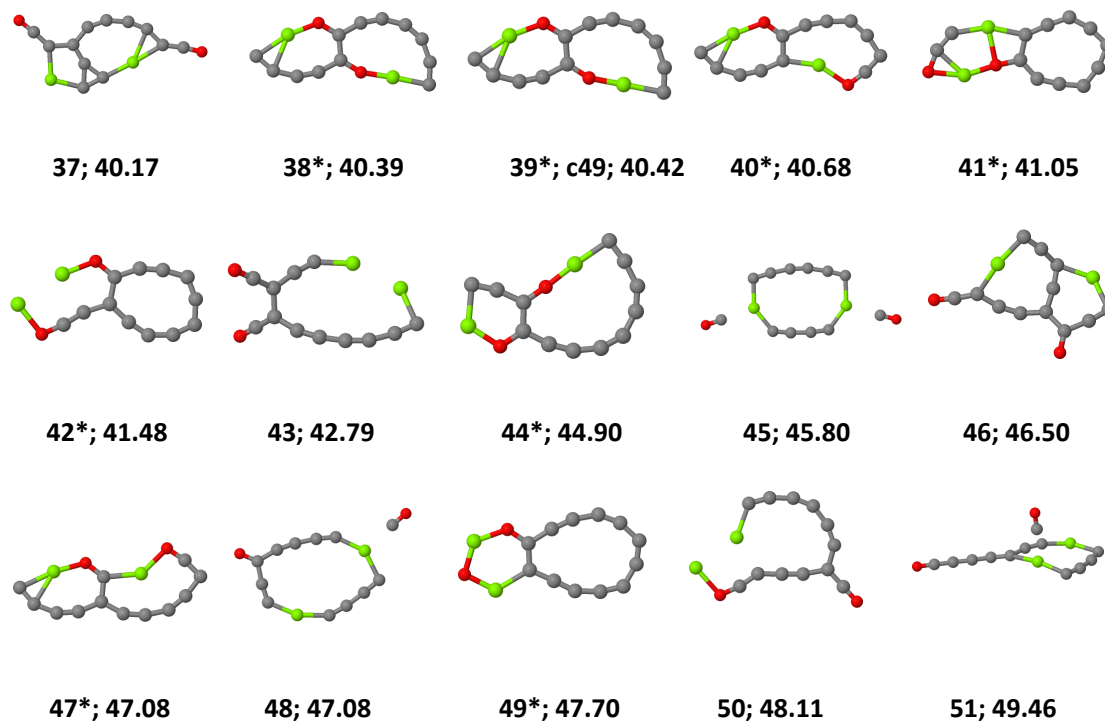

Figure S7: Isomers **37-51** of  $C_{12}O_2Mg_2$  considered on the singlet PES. Relative energies including ZPVE corrections (in  $\text{kcal mol}^{-1}$ ) are calculated at the PBE0-D3/def2-TZVP level. Isomers identified by chemical intuition are marked with an asterisk whereas unmarked ones are from AUTOMATON.



Table S3: Total energy ( $E$ ), zero-point vibrational energy ( $ZPVE$ ),  $ZPVE$ -corrected total energy ( $E+ZPVE$ ), thermal correction to Gibbs free energy ( $G$ ), sum of electronic and thermal Free energies ( $E+G$ ), net dipole moment ( $\mu$ ), relative energy without  $ZPVE$ -correction ( $\Delta E_e$ ),  $ZPVE$ -corrected relative energy ( $\Delta E_0$ ), and number of imaginary frequencies of  $C_{12}O_2Mg_2$  isomers (**37-51**) in their respective singlet ground electronic states calculated at the PBE0-D3/def2-TZVP level of theory.

| Isomer    | $E$          | $ZPVE$   | $E+ZPVE$     | $G$      | $E+G$        | $\mu$ | $\Delta E_e$           | $\Delta E_0$ | $\Delta G$ | NImag |
|-----------|--------------|----------|--------------|----------|--------------|-------|------------------------|--------------|------------|-------|
|           | a.u          |          |              |          |              | Debye | kcal mol <sup>-1</sup> |              |            |       |
| <b>37</b> | -1006.895684 | 0.068987 | -1006.826697 | 0.024818 | -1006.870866 | 8.18  | 39.50                  | 40.17        | 41.53      | 0     |
| <b>38</b> | -1006.894807 | 0.068450 | -1006.826357 | 0.025596 | -1006.869211 | 1.98  | 40.05                  | 40.38        | 42.57      | 0     |
| <b>39</b> | -1006.894788 | 0.068491 | -1006.826297 | 0.025710 | -1006.869078 | 1.81  | 40.06                  | 40.42        | 42.66      | 0     |
| <b>40</b> | -1006.894739 | 0.068853 | -1006.825886 | 0.024697 | -1006.870042 | 0.87  | 40.09                  | 40.68        | 42.05      | 0     |
| <b>41</b> | -1006.894277 | 0.068977 | -1006.825300 | 0.026170 | -1006.868107 | 4.30  | 40.38                  | 41.05        | 43.26      | 0     |
| <b>42</b> | -1006.894583 | 0.069969 | -1006.824613 | 0.027655 | -1006.866928 | 11.20 | 40.19                  | 41.48        | 44.00      | 0     |
| <b>43</b> | -1006.891292 | 0.068764 | -1006.822528 | 0.022539 | -1006.868753 | 3.85  | 42.25                  | 42.79        | 42.86      | 0     |
| <b>44</b> | -1006.887884 | 0.068722 | -1006.819163 | 0.025491 | -1006.862393 | 7.58  | 44.39                  | 44.90        | 46.85      | 0     |
| <b>45</b> | -1006.879066 | 0.061338 | -1006.817728 | 0.006014 | -1006.873052 | 2.94  | 49.92                  | 45.80        | 40.16      | 0     |
| <b>46</b> | -1006.884964 | 0.068356 | -1006.816608 | 0.024044 | -1006.860920 | 6.51  | 46.22                  | 46.50        | 47.77      | 0     |
| <b>47</b> | -1006.883999 | 0.068307 | -1006.815692 | 0.025564 | -1006.858435 | 3.95  | 46.83                  | 47.08        | 49.33      | 0     |
| <b>48</b> | -1006.87976  | 0.064079 | -1006.815682 | 0.012855 | -1006.866905 | 6.44  | 49.49                  | 47.08        | 44.02      | 0     |
| <b>49</b> | -1006.883878 | 0.069181 | -1006.814697 | 0.026407 | -1006.857471 | 10.27 | 46.90                  | 47.70        | 49.94      | 0     |
| <b>50</b> | -1006.882119 | 0.068075 | -1006.814044 | 0.021702 | -1006.860417 | 6.54  | 48.01                  | 48.11        | 48.09      | 0     |
| <b>51</b> | -1006.875557 | 0.063654 | -1006.811903 | 0.013370 | -1006.862187 | 4.73  | 52.13                  | 49.45        | 46.98      | 0     |

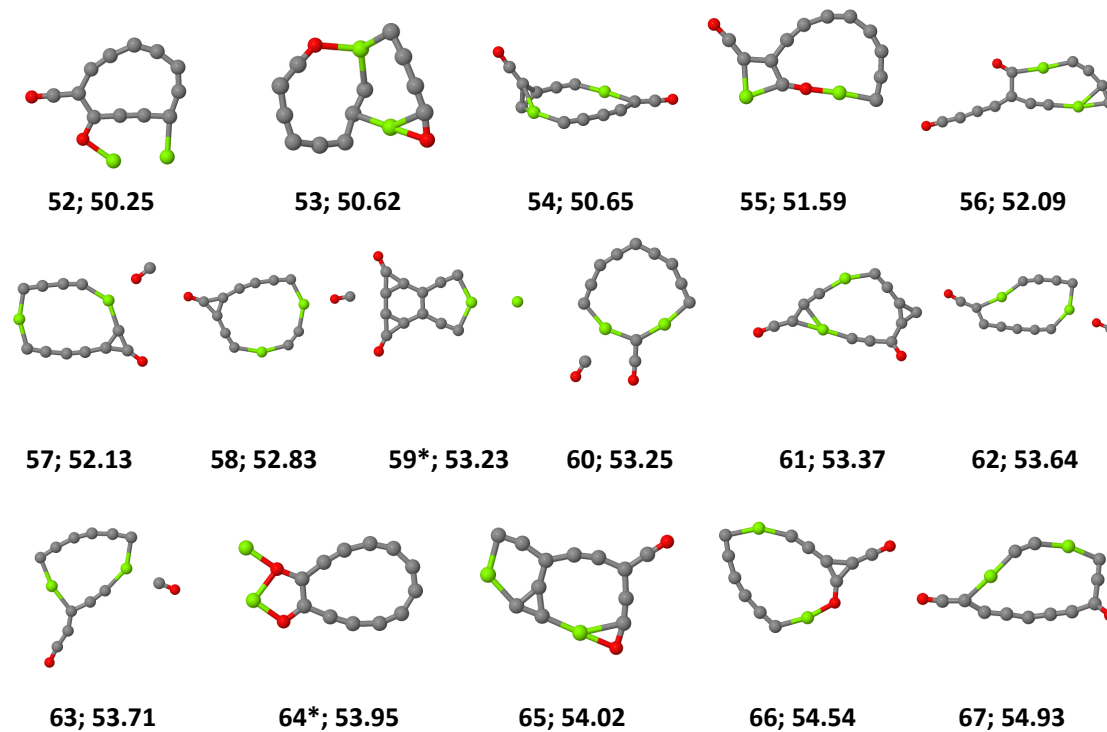

Figure S8: Isomers **52-67** of  $C_{12}O_2Mg_2$  considered on the singlet PES. Relative energies including ZPVE corrections (in  $\text{kcal mol}^{-1}$ ) are calculated at the PBE0-D3/def2-TZVP level. Isomers identified by chemical intuition are marked with an asterisk whereas unmarked ones are from AUTOMATON.

Table S4: Total energy ( $E$ ), zero-point vibrational energy ( $ZPVE$ ),  $ZPVE$ -corrected total energy ( $E+ZPVE$ ), thermal correction to Gibbs free energy ( $G$ ), sum of electronic and thermal Free energies ( $E+G$ ), net dipole moment ( $\mu$ ), relative energy without  $ZPVE$ -correction ( $\Delta E_e$ ),  $ZPVE$ -corrected relative energy ( $\Delta E_0$ ), and number of imaginary frequencies of  $C_{12}O_2Mg_2$  isomers (**52-67**) in their respective singlet ground electronic states calculated at the PBE0-D3/def2-TZVP level of theory.

| Isomer    | $E$          | $ZPVE$   | $E+ZPVE$     | $G$      | $E+G$        | $\mu$ | $\Delta E_e$           | $\Delta E_0$ | $\Delta G$ | NImag |
|-----------|--------------|----------|--------------|----------|--------------|-------|------------------------|--------------|------------|-------|
|           | a.u          |          |              |          |              | Debye | kcal mol <sup>-1</sup> |              |            |       |
| <b>52</b> | -1006.880455 | 0.069814 | -1006.810641 | 0.028387 | -1006.852068 | 8.39  | 49.05                  | 50.25        | 53.33      | 1     |
| <b>53</b> | -1006.877254 | 0.067205 | -1006.810050 | 0.022803 | -1006.854451 | 3.96  | 51.06                  | 50.61        | 51.83      | 0     |
| <b>54</b> | -1006.876231 | 0.066235 | -1006.809997 | 0.020060 | -1006.856171 | 1.17  | 51.70                  | 50.65        | 50.75      | 0     |
| <b>55</b> | -1006.876763 | 0.068263 | -1006.808500 | 0.023885 | -1006.852878 | 8.41  | 51.37                  | 51.59        | 52.82      | 0     |
| <b>56</b> | -1006.872803 | 0.065093 | -1006.807710 | 0.016572 | -1006.856231 | 2.01  | 53.85                  | 52.09        | 50.72      | 0     |
| <b>57</b> | -1006.871180 | 0.063543 | -1006.807637 | 0.012721 | -1006.858459 | 5.40  | 54.87                  | 52.13        | 49.32      | 0     |
| <b>58</b> | -1006.869810 | 0.063286 | -1006.806525 | 0.011760 | -1006.858050 | 9.22  | 55.73                  | 52.83        | 49.58      | 0     |
| <b>59</b> | -1006.877152 | 0.071258 | -1006.805894 | 0.025757 | -1006.851395 | 12.70 | 51.12                  | 53.23        | 53.75      | 0     |
| <b>60</b> | -1006.868346 | 0.062491 | -1006.805855 | 0.011822 | -1006.856524 | 4.66  | 56.65                  | 53.25        | 50.53      | 0     |
| <b>61</b> | -1006.872586 | 0.066918 | -1006.805668 | 0.020251 | -1006.852335 | 6.50  | 53.99                  | 53.37        | 53.16      | 0     |
| <b>62</b> | -1006.867229 | 0.061987 | -1006.805242 | 0.011493 | -1006.855736 | 4.06  | 57.35                  | 53.63        | 51.03      | 0     |
| <b>63</b> | -1006.868556 | 0.063427 | -1006.805129 | 0.012112 | -1006.856444 | 4.38  | 56.52                  | 53.71        | 50.58      | 0     |
| <b>64</b> | -1006.874625 | 0.069878 | -1006.804746 | 0.027353 | -1006.847272 | 8.04  | 52.71                  | 53.95        | 56.34      | 0     |
| <b>65</b> | -1006.873991 | 0.069368 | -1006.804624 | 0.025756 | -1006.848235 | 8.03  | 53.11                  | 54.02        | 55.73      | 0     |
| <b>66</b> | -1006.870165 | 0.066358 | -1006.803807 | 0.018807 | -1006.851358 | 3.25  | 55.51                  | 54.54        | 53.78      | 0     |
| <b>67</b> | -1006.867689 | 0.064509 | -1006.803180 | 0.017059 | -1006.850630 | 7.01  | 57.06                  | 54.93        | 54.23      | 0     |

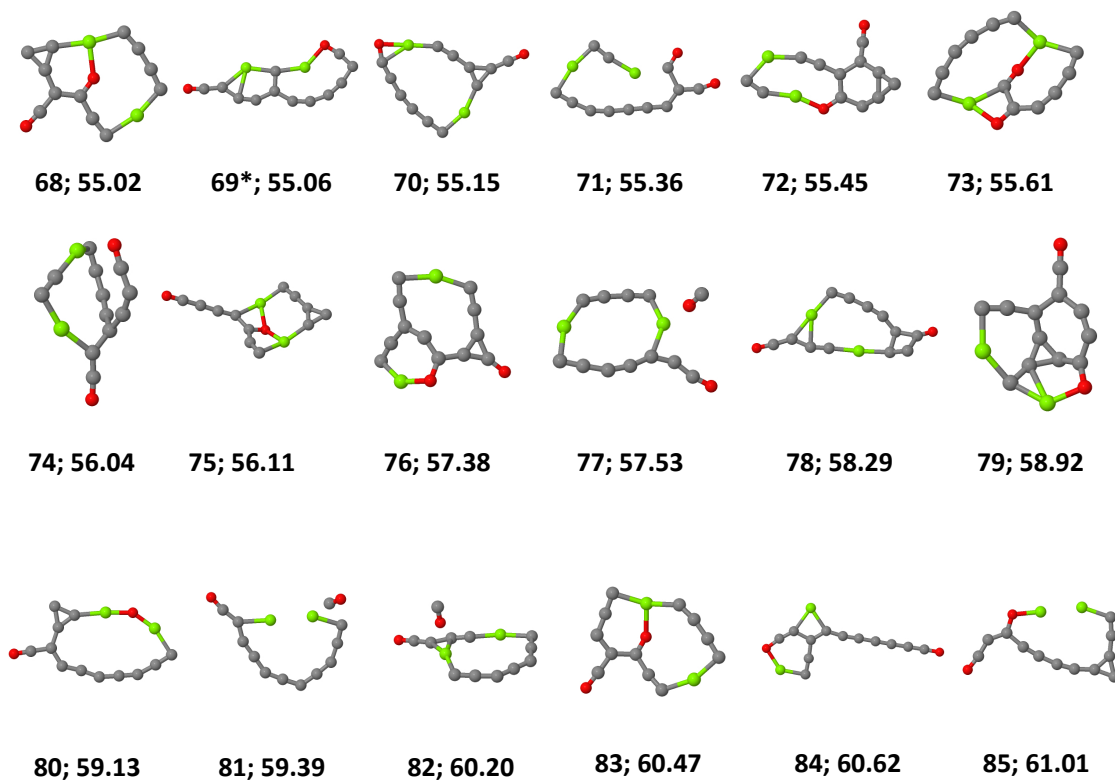

Figure S9: Isomers **68-85** of  $C_{12}O_2Mg_2$  considered on the singlet PES. Relative energies including ZPVE corrections (in  $\text{kcal mol}^{-1}$ ) are calculated at the PBE0-D3/def2-TZVP level. Isomers identified by chemical intuition are marked with an asterisk whereas unmarked ones are from AUTOMATON.

Table S5: Total energy ( $E$ ), zero-point vibrational energy ( $ZPVE$ ),  $ZPVE$ -corrected total energy ( $E+ZPVE$ ), thermal correction to Gibbs free energy ( $G$ ), sum of electronic and thermal Free energies ( $E+G$ ), net dipole moment ( $\mu$ ), relative energy without  $ZPVE$ -correction ( $\Delta E_e$ ),  $ZPVE$ -corrected relative energy ( $\Delta E_0$ ), and number of imaginary frequencies of  $C_{12}O_2Mg_2$  isomers (**68-85**) in their respective singlet ground electronic states calculated at the PBE0-D3/def2-TZVP level of theory.

| Isomer    | $E$          | $ZPVE$   | $E + ZPVE$   | $G$      | $E + G$      | $\mu$ | $\Delta E_e$           | $\Delta E_0$ | $\Delta G$ | NImag |
|-----------|--------------|----------|--------------|----------|--------------|-------|------------------------|--------------|------------|-------|
|           | a.u          |          |              |          |              | Debye | kcal mol <sup>-1</sup> |              |            |       |
| <b>68</b> | -1006.869833 | 0.066799 | -1006.803034 | 0.020038 | -1006.849795 | 5.59  | 55.72                  | 55.02        | 54.76      | 0     |
| <b>69</b> | -1006.871664 | 0.068695 | -1006.802969 | 0.024709 | -1006.846955 | 4.63  | 54.57                  | 55.06        | 56.54      | 0     |
| <b>70</b> | -1006.868957 | 0.066123 | -1006.802835 | 0.019339 | -1006.849618 | 2.71  | 56.27                  | 55.15        | 54.87      | 0     |
| <b>71</b> | -1006.865711 | 0.063210 | -1006.802501 | 0.016888 | -1006.848823 | 1.85  | 58.30                  | 55.35        | 55.37      | 0     |
| <b>72</b> | -1006.870286 | 0.067932 | -1006.802354 | 0.025629 | -1006.844657 | 5.97  | 55.43                  | 55.45        | 57.98      | 0     |
| <b>73</b> | -1006.868071 | 0.065969 | -1006.802102 | 0.022588 | -1006.845483 | 5.18  | 56.82                  | 55.60        | 57.46      | 0     |
| <b>74</b> | -1006.867786 | 0.066384 | -1006.801402 | 0.020744 | -1006.847042 | 2.39  | 57.00                  | 56.04        | 56.48      | 0     |
| <b>75</b> | -1006.867971 | 0.066677 | -1006.801294 | 0.021862 | -1006.846109 | 7.64  | 56.89                  | 56.11        | 57.07      | 0     |
| <b>76</b> | -1006.868379 | 0.069108 | -1006.799271 | 0.026349 | -1006.842030 | 3.92  | 56.63                  | 57.38        | 59.63      | 0     |
| <b>77</b> | -1006.861050 | 0.062016 | -1006.799034 | 0.010967 | -1006.850083 | 2.35  | 61.23                  | 57.53        | 54.58      | 0     |
| <b>78</b> | -1006.863716 | 0.065896 | -1006.797821 | 0.019202 | -1006.844514 | 3.30  | 59.56                  | 58.29        | 58.07      | 0     |
| <b>79</b> | -1006.868108 | 0.071286 | -1006.796823 | 0.031508 | -1006.836600 | 6.64  | 56.80                  | 58.92        | 63.04      | 0     |
| <b>80</b> | -1006.861551 | 0.065059 | -1006.796492 | 0.019321 | -1006.842230 | 2.01  | 60.91                  | 59.13        | 59.50      | 0     |
| <b>81</b> | -1006.859372 | 0.063300 | -1006.796072 | 0.013070 | -1006.846302 | 5.53  | 62.28                  | 59.39        | 56.95      | 0     |
| <b>82</b> | -1006.856419 | 0.061646 | -1006.794773 | 0.011077 | -1006.845342 | 3.25  | 64.13                  | 60.20        | 57.55      | 0     |
| <b>83</b> | -1006.860241 | 0.065896 | -1006.794346 | 0.020233 | -1006.840008 | 6.25  | 61.74                  | 60.47        | 60.90      | 0     |
| <b>84</b> | -1006.861854 | 0.067735 | -1006.794118 | 0.021436 | -1006.840418 | 17.15 | 60.72                  | 60.62        | 60.64      | 0     |
| <b>85</b> | -1006.861350 | 0.067868 | -1006.793482 | 0.021686 | -1006.839664 | 5.99  | 61.04                  | 61.01        | 61.11      | 0     |

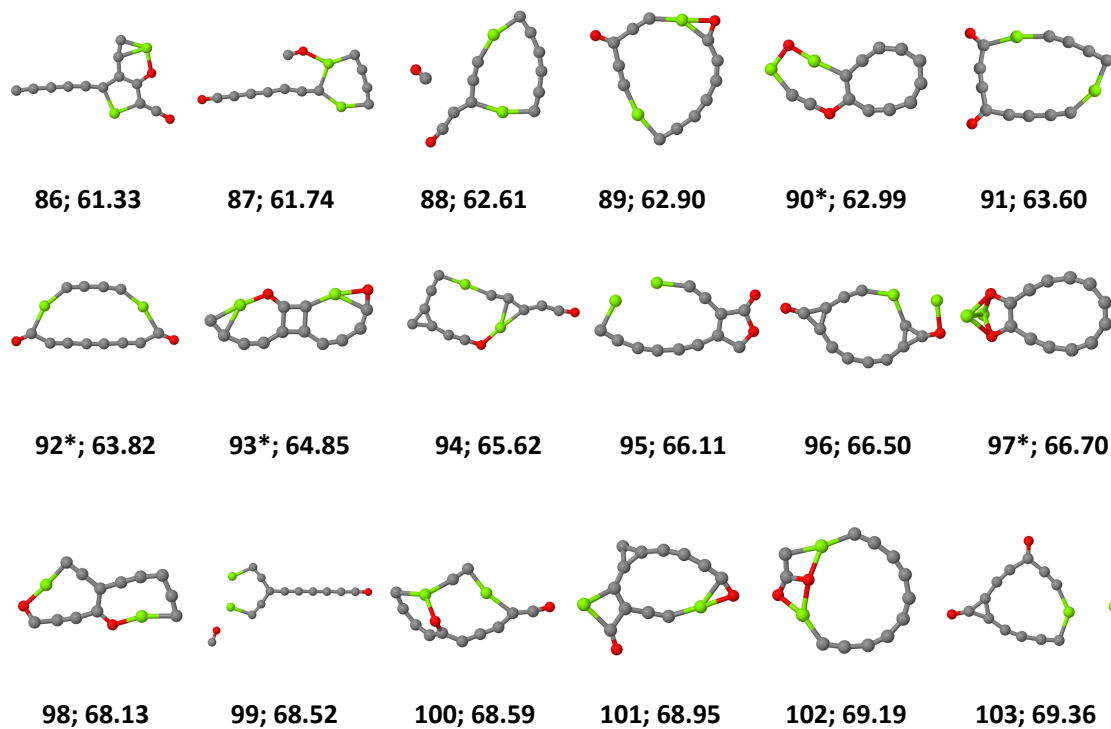

Figure S10: Isomers **86-103** of  $C_{12}O_2Mg_2$  considered on the singlet PES. Relative energies including ZPVE corrections (in  $\text{kcal mol}^{-1}$ ) are calculated at the PBE0-D3/def2-TZVP level. Isomers identified by chemical intuition are marked with an asterisk whereas unmarked ones are from AUTOMATON.

Table S6: Total energy ( $E$ ), zero-point vibrational energy ( $ZPVE$ ),  $ZPVE$ -corrected total energy ( $E+ZPVE$ ), thermal correction to Gibbs free energy ( $G$ ), sum of electronic and thermal Free energies ( $E + G$ ), net dipole moment ( $\mu$ ), relative energy without  $ZPVE$ -correction ( $\Delta E_e$ ),  $ZPVE$ -corrected relative energy ( $\Delta E_0$ ), and number of imaginary frequencies of  $C_{12}O_2Mg_2$  isomers (**86-103**) in their respective singlet ground electronic states calculated at the PBE0-D3/def2-TZVP level of theory.

| Isomer     | $E$          | $ZPVE$   | $E+ZPVE$     | $G$      | $E + G$      | $\mu$ | $\Delta E_e$           | $\Delta E_0$ | $\Delta G$ | NImag |
|------------|--------------|----------|--------------|----------|--------------|-------|------------------------|--------------|------------|-------|
|            | a.u          |          |              |          |              | Debye | kcal mol <sup>-1</sup> |              |            |       |
| <b>86</b>  | -1006.861254 | 0.068267 | -1006.792987 | 0.022832 | -1006.838422 | 15.76 | 61.10                  | 61.33        | 61.89      | 0     |
| <b>87</b>  | -1006.855629 | 0.063303 | -1006.792326 | 0.014431 | -1006.841198 | 2.21  | 64.63                  | 61.74        | 60.15      | 0     |
| <b>88</b>  | -1006.853201 | 0.062261 | -1006.790940 | 0.008195 | -1006.845006 | 1.44  | 66.15                  | 62.61        | 57.76      | 0     |
| <b>89</b>  | -1006.855489 | 0.065008 | -1006.790481 | 0.018143 | -1006.837346 | 2.26  | 64.71                  | 62.90        | 62.57      | 0     |
| <b>90</b>  | -1006.859746 | 0.069412 | -1006.790334 | 0.027866 | -1006.831880 | 9.73  | 62.05                  | 62.99        | 66.00      | 0     |
| <b>91</b>  | -1006.855231 | 0.065864 | -1006.789367 | 0.017837 | -1006.837394 | 4.95  | 64.88                  | 63.60        | 62.54      | 0     |
| <b>92</b>  | -1006.853064 | 0.064047 | -1006.789017 | 0.014460 | -1006.838604 | 2.82  | 66.24                  | 63.82        | 61.78      | 0     |
| <b>93</b>  | -1006.855959 | 0.068587 | -1006.787372 | 0.025847 | -1006.830112 | 6.04  | 64.42                  | 64.85        | 67.11      | 0     |
| <b>94</b>  | -1006.852069 | 0.065920 | -1006.786149 | 0.019492 | -1006.832577 | 5.07  | 66.86                  | 65.62        | 65.56      | 0     |
| <b>95</b>  | -1006.854255 | 0.068890 | -1006.785365 | 0.024970 | -1006.829285 | 8.24  | 65.49                  | 66.11        | 67.63      | 0     |
| <b>96</b>  | -1006.853823 | 0.069090 | -1006.784733 | 0.025479 | -1006.828344 | 7.79  | 65.76                  | 66.50        | 68.22      | 0     |
| <b>97</b>  | -1006.853770 | 0.069354 | -1006.784415 | 0.027199 | -1006.826571 | 3.26  | 65.80                  | 66.70        | 69.33      | 0     |
| <b>98</b>  | -1006.847379 | 0.065230 | -1006.782150 | 0.022254 | -1006.825125 | 5.08  | 69.81                  | 68.13        | 70.24      | 0     |
| <b>99</b>  | -1006.845821 | 0.064292 | -1006.781529 | 0.010953 | -1006.834868 | 12.83 | 70.78                  | 68.52        | 64.13      | 0     |
| <b>100</b> | -1006.846742 | 0.065331 | -1006.781411 | 0.020164 | -1006.826578 | 5.92  | 70.21                  | 68.59        | 69.32      | 0     |
| <b>101</b> | -1006.848428 | 0.067583 | -1006.780844 | 0.024231 | -1006.824197 | 4.12  | 69.15                  | 68.95        | 70.82      | 0     |
| <b>102</b> | -1006.845929 | 0.065472 | -1006.780458 | 0.020503 | -1006.825426 | 3.49  | 70.72                  | 69.19        | 70.05      | 0     |
| <b>103</b> | -1006.848326 | 0.068145 | -1006.780181 | 0.019353 | -1006.828973 | 12.60 | 69.21                  | 69.36        | 67.82      | 0     |

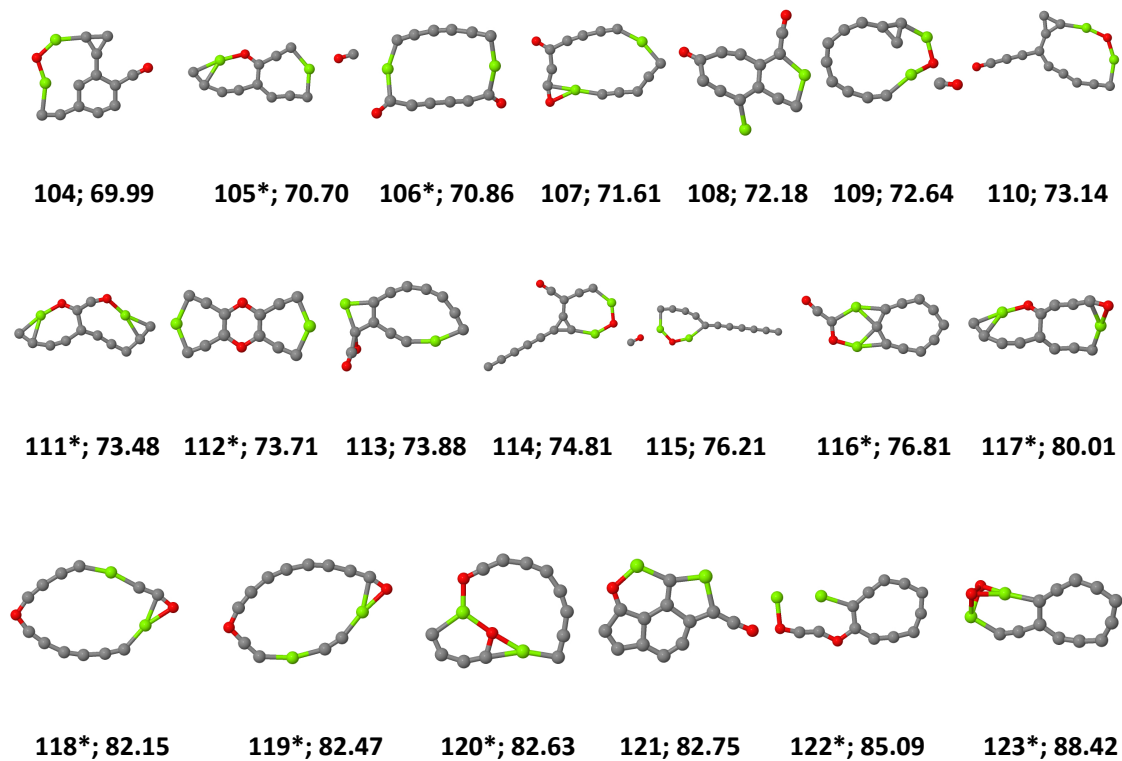

Figure S11: Isomers **104-123** of  $C_{12}O_2Mg_2$  considered on the singlet PES. Relative energies including ZPVE corrections (in  $\text{kcal mol}^{-1}$ ) are calculated at the PBE0-D3/def2-TZVP level. Isomers identified by chemical intuition are marked with an asterisk whereas unmarked ones are from AUTOMATON.



Table S7: Total energy ( $E$ ), zero-point vibrational energy ( $ZPVE$ ),  $ZPVE$ -corrected total energy ( $E+ZPVE$ ), thermal correction to Gibbs free energy ( $G$ ), sum of electronic and thermal Free energies ( $E + G$ ), net dipole moment ( $\mu$ ), relative energy without  $ZPVE$ -correction ( $\Delta E_e$ ),  $ZPVE$ -corrected relative energy ( $\Delta E_0$ ), and number of imaginary frequencies of  $C_{12}O_2Mg_2$  isomers (**104-123**) in their respective singlet ground electronic states calculated at the PBE0-D3/def2-TZVP level of theory.

| Isomer     | $E$          | $ZPVE$   | $E+ZPVE$     | $G$      | $E + G$      | $\mu$ | $\Delta E_e$           | $\Delta E_0$ | $\Delta G$ | NImag |
|------------|--------------|----------|--------------|----------|--------------|-------|------------------------|--------------|------------|-------|
|            | a.u          |          |              |          |              | Debye | kcal mol <sup>-1</sup> |              |            |       |
| <b>104</b> | -1006.847384 | 0.068206 | -1006.779178 | 0.026340 | -1006.821044 | 2.97  | 69.80                  | 69.99        | 72.80      | 0     |
| <b>105</b> | -1006.842496 | 0.064455 | -1006.778041 | 0.017031 | -1006.825465 | 7.54  | 72.87                  | 70.70        | 70.02      | 0     |
| <b>106</b> | -1006.842243 | 0.064448 | -1006.777796 | 0.015570 | -1006.826673 | 1.26  | 73.03                  | 70.86        | 69.27      | 0     |
| <b>107</b> | -1006.841494 | 0.064891 | -1006.776604 | 0.017577 | -1006.823917 | 2.40  | 73.50                  | 71.61        | 70.99      | 0     |
| <b>108</b> | -1006.845141 | 0.069450 | -1006.775691 | 0.026374 | -1006.818767 | 11.25 | 71.21                  | 72.18        | 74.23      | 0     |
| <b>109</b> | -1006.839222 | 0.064273 | -1006.774949 | 0.018129 | -1006.821093 | 5.27  | 74.93                  | 72.64        | 72.77      | 0     |
| <b>110</b> | -1006.839335 | 0.065174 | -1006.774162 | 0.017773 | -1006.821562 | 2.03  | 74.85                  | 73.14        | 72.47      | 0     |
| <b>111</b> | -1006.840201 | 0.066576 | -1006.773625 | 0.024032 | -1006.816169 | 7.42  | 74.31                  | 73.48        | 75.86      | 0     |
| <b>112</b> | -1006.844604 | 0.071358 | -1006.773246 | 0.029582 | -1006.815022 | 0.002 | 71.55                  | 73.71        | 76.58      | 0     |
| <b>113</b> | -1006.841411 | 0.068432 | -1006.772980 | 0.025598 | -1006.815813 | 8.08  | 73.55                  | 73.88        | 76.08      | 0     |
| <b>114</b> | -1006.837907 | 0.066415 | -1006.771492 | 0.019766 | -1006.818141 | 16.06 | 75.75                  | 74.81        | 74.62      | 0     |
| <b>115</b> | -1006.831120 | 0.061849 | -1006.769272 | 0.011047 | -1006.820073 | 15.91 | 80.01                  | 76.21        | 73.41      | 0     |
| <b>116</b> | -1006.835096 | 0.066779 | -1006.768316 | 0.023144 | -1006.811952 | 3.44  | 77.51                  | 76.81        | 78.50      | 0     |
| <b>117</b> | -1006.829229 | 0.066011 | -1006.763218 | 0.023274 | -1006.805955 | 5.27  | 81.20                  | 80.01        | 82.27      | 0     |
| <b>118</b> | -1006.826873 | 0.067078 | -1006.759795 | 0.021373 | -1006.805500 | 2.52  | 82.68                  | 82.15        | 82.55      | 0     |
| <b>119</b> | -1006.825602 | 0.066308 | -1006.759294 | 0.020215 | -1006.805387 | 3.76  | 83.47                  | 82.47        | 82.62      | 0     |
| <b>120</b> | -1006.823105 | 0.064062 | -1006.759043 | 0.017186 | -1006.805919 | 6.53  | 85.04                  | 82.63        | 82.29      | 0     |
| <b>121</b> | -1006.829159 | 0.070312 | -1006.758847 | 0.029143 | -1006.800016 | 12.32 | 81.24                  | 82.75        | 85.99      | 0     |
| <b>122</b> | -1006.824480 | 0.069365 | -1006.755115 | 0.026870 | -1006.797610 | 10.86 | 84.18                  | 85.09        | 87.50      | 0     |
| <b>123</b> | -1006.817738 | 0.067925 | -1006.749813 | 0.026707 | -1006.791031 | 9.35  | 88.41                  | 88.42        | 91.63      | 0     |

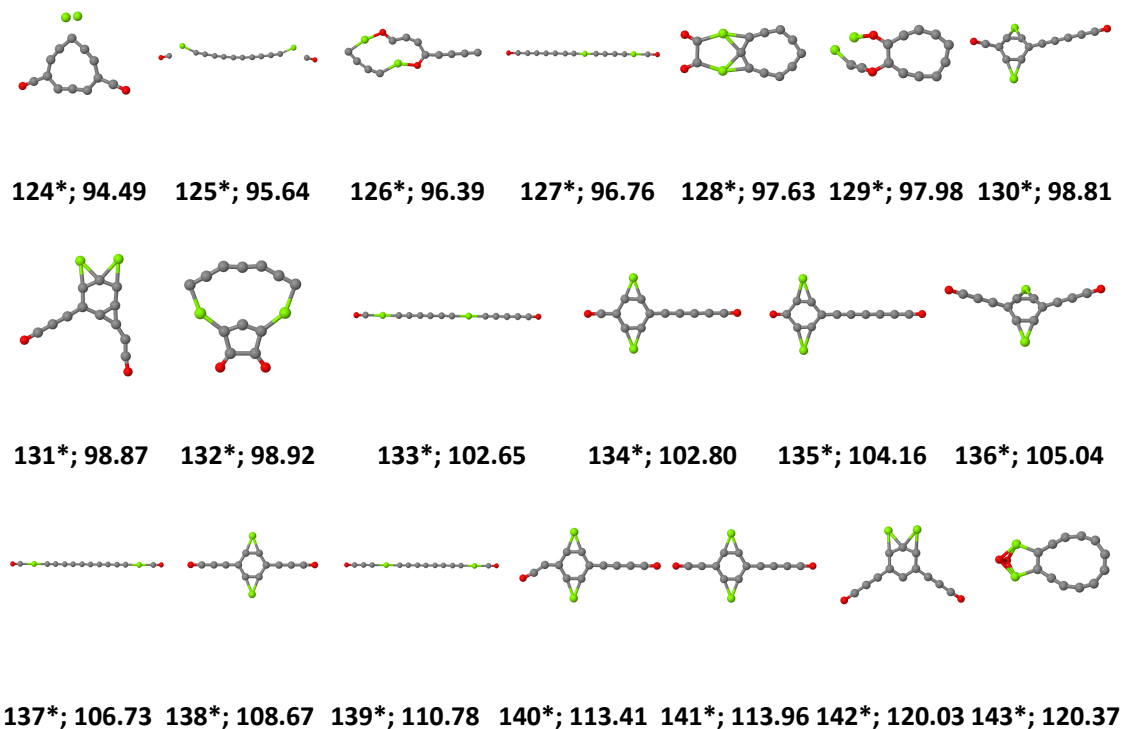

Figure S12: Isomers **124-143** of  $C_{12}O_2Mg_2$  considered on the singlet PES. Relative energies including ZPVE corrections (in  $\text{kcal mol}^{-1}$ ) are calculated at the PBE0-D3/def2-TZVP level. Isomers identified by chemical intuition are marked with an asterisk whereas unmarked ones are from AUTOMATON.

Table S8: Total energy ( $E$ ), zero-point vibrational energy ( $ZPVE$ ),  $ZPVE$ -corrected total energy ( $E+ZPVE$ ), thermal correction to Gibbs free energy ( $G$ ), sum of electronic and thermal Free energies ( $E + G$ ), net dipole moment ( $\mu$ ), relative energy without  $ZPVE$ -correction ( $\Delta E_e$ ),  $ZPVE$ -corrected relative energy ( $\Delta E_0$ ), and number of imaginary frequencies of  $C_{12}O_2Mg_2$  isomers (**124-143**) in their respective singlet ground electronic states calculated at the PBE0-D3/def2-TZVP level of theory.

| Isomer     | $E$          | $ZPVE$   | $E+ZPVE$     | $G$      | $E + G$      | $\mu$ | $\Delta E_e$           | $\Delta E_0$ | $\Delta G$ | NImag |
|------------|--------------|----------|--------------|----------|--------------|-------|------------------------|--------------|------------|-------|
|            | a.u          |          |              |          |              | Debye | kcal mol <sup>-1</sup> |              |            |       |
| <b>124</b> | -1006.808350 | 0.068211 | -1006.740139 | 0.022830 | -1006.785520 | 4.12  | 94.30                  | 94.49        | 95.09      | 0     |
| <b>125</b> | -1006.799876 | 0.061580 | -1006.738296 | 0.006552 | -1006.793324 | 2.30  | 99.62                  | 95.64        | 90.19      | 0     |
| <b>126</b> | -1006.801339 | 0.064233 | -1006.737106 | 0.017200 | -1006.784139 | 11.90 | 98.70                  | 96.39        | 95.96      | 0     |
| <b>127</b> | -1006.799195 | 0.062677 | -1006.736518 | 0.012516 | -1006.786679 | 14.08 | 100.04                 | 96.76        | 94.36      | 1     |
| <b>128</b> | -1006.799877 | 0.064744 | -1006.735133 | 0.022030 | -1006.777847 | 1.51  | 99.62                  | 97.63        | 99.90      | 1     |
| <b>129</b> | -1006.803856 | 0.069281 | -1006.734575 | 0.026960 | -1006.776896 | 6.34  | 97.12                  | 97.98        | 100.50     | 0     |
| <b>130</b> | -1006.802264 | 0.069011 | -1006.733253 | 0.023816 | -1006.778448 | 6.15  | 98.12                  | 98.81        | 99.53      | 0     |
| <b>131</b> | -1006.802528 | 0.069380 | -1006.733148 | 0.023984 | -1006.778544 | 8.83  | 97.95                  | 98.87        | 99.47      | 0     |
| <b>132</b> | -1006.796707 | 0.063626 | -1006.733081 | 0.016699 | -1006.780008 | 1.30  | 101.60                 | 98.92        | 98.55      | 0     |
| <b>133</b> | -1006.789876 | 0.062745 | -1006.727131 | 0.012583 | -1006.777293 | 10.61 | 105.89                 | 102.65       | 100.25     | 1     |
| <b>134</b> | -1006.795659 | 0.068770 | -1006.726889 | 0.025577 | -1006.770082 | 7.41  | 102.26                 | 102.80       | 104.78     | 1     |
| <b>135</b> | -1006.790896 | 0.066165 | -1006.724730 | 0.019247 | -1006.771649 | 6.61  | 105.25                 | 104.16       | 103.79     | 0     |
| <b>136</b> | -1006.792235 | 0.068917 | -1006.723318 | 0.023972 | -1006.768263 | 4.56  | 104.41                 | 105.04       | 105.92     | 0     |
| <b>137</b> | -1006.782855 | 0.062220 | -1006.720635 | 0.014131 | -1006.768724 | 0.00  | 110.30                 | 106.73       | 105.63     | 2     |
| <b>138</b> | -1006.786303 | 0.068758 | -1006.717545 | 0.026085 | -1006.760218 | 0.00  | 108.13                 | 108.67       | 110.97     | 1     |
| <b>139</b> | -1006.776749 | 0.062579 | -1006.714170 | 0.012574 | -1006.764175 | 6.01  | 114.13                 | 110.78       | 108.48     | 1     |
| <b>140</b> | -1006.779149 | 0.069165 | -1006.709984 | 0.022592 | -1006.756557 | 2.75  | 112.62                 | 113.41       | 113.26     | 0     |
| <b>141</b> | -1006.778172 | 0.069064 | -1006.709108 | 0.024647 | -1006.753525 | 2.11  | 113.24                 | 113.96       | 115.17     | 1     |
| <b>142</b> | -1006.766677 | 0.067248 | -1006.699428 | 0.022287 | -1006.744390 | 2.66  | 120.45                 | 120.03       | 120.90     | 1     |
| <b>143</b> | -1006.765560 | 0.066672 | -1006.698888 | 0.023984 | -1006.741576 | 7.74  | 121.15                 | 120.37       | 122.66     | 0     |

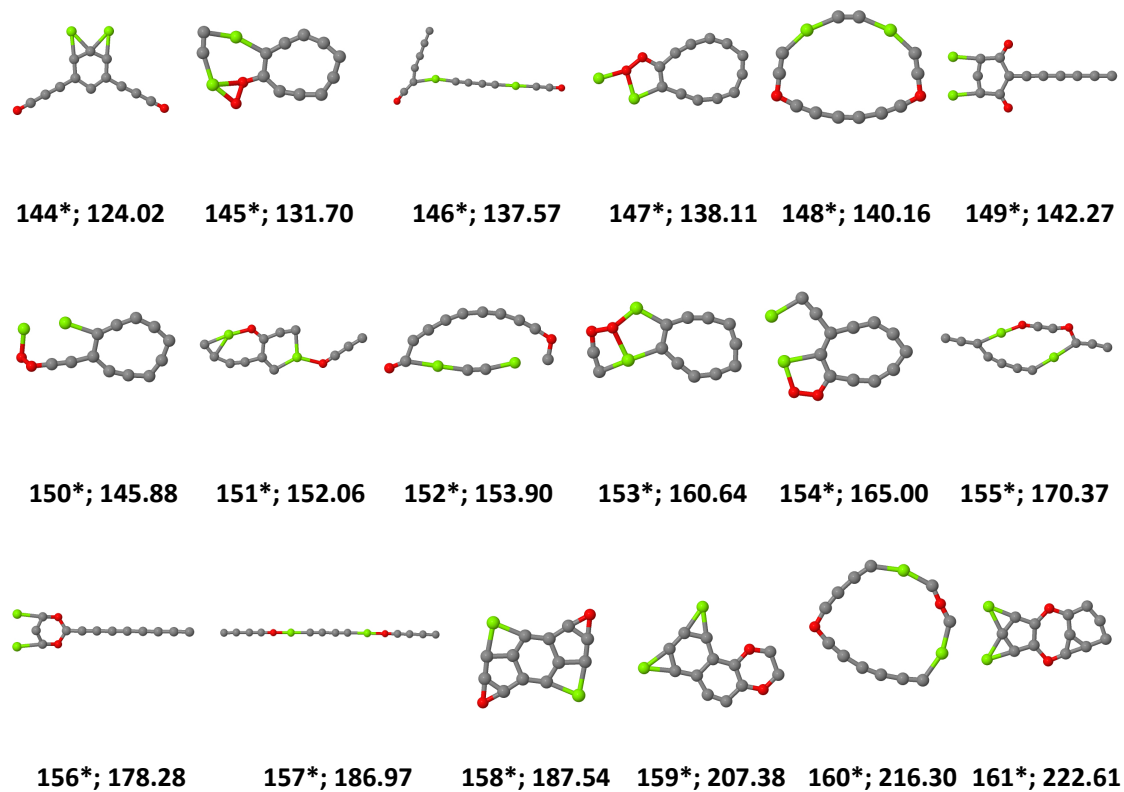

Figure S13: Isomers **144-161** of  $C_{12}O_2Mg_2$  considered on the singlet PES. Relative energies including ZPVE corrections (in  $\text{kcal mol}^{-1}$ ) are calculated at the PBE0-D3/def2-TZVP level. Isomers identified by chemical intuition are marked with an asterisk whereas unmarked ones are from AUTOMATON.

Table S9: Total energy ( $E$ ), zero-point vibrational energy ( $ZPVE$ ),  $ZPVE$ -corrected total energy ( $E+ZPVE$ ), thermal correction to Gibbs free energy ( $G$ ), sum of electronic and thermal Free energies ( $E + G$ ), net dipole moment ( $\mu$ ), relative energy without  $ZPVE$ -correction ( $\Delta E_e$ ),  $ZPVE$ -corrected relative energy ( $\Delta E_0$ ), and number of imaginary frequencies of  $C_{12}O_2Mg_2$  isomers (**144-161**) in their respective singlet ground electronic states calculated at the PBE0-D3/def2-TZVP level of theory.

| Isomer     | $E$          | $ZPVE$   | $E+ZPVE$     | $G$      | $E + G$      | $\mu$ | $\Delta E_e$           | $\Delta E_0$ | $\Delta G$ | NImag |
|------------|--------------|----------|--------------|----------|--------------|-------|------------------------|--------------|------------|-------|
|            | a.u          |          |              |          |              | Debye | kcal mol <sup>-1</sup> |              |            |       |
| <b>144</b> | -1006.759914 | 0.066842 | -1006.693072 | 0.022598 | -1006.737316 | 1.34  | 124.69                 | 124.02       | 125.34     | 2     |
| <b>145</b> | -1006.747521 | 0.066691 | -1006.680830 | 0.023679 | -1006.723842 | 4.85  | 132.47                 | 131.70       | 133.79     | 0     |
| <b>146</b> | -1006.734059 | 0.062572 | -1006.671486 | 0.009391 | -1006.724668 | 6.09  | 140.92                 | 137.57       | 133.27     | 0     |
| <b>147</b> | -1006.739512 | 0.068888 | -1006.670624 | 0.026036 | -1006.713476 | 9.73  | 137.49                 | 138.11       | 140.30     | 0     |
| <b>148</b> | -1006.733468 | 0.066105 | -1006.667363 | 0.019202 | -1006.714266 | 3.15  | 141.29                 | 140.15       | 139.80     | 0     |
| <b>149</b> | -1006.729833 | 0.065836 | -1006.663996 | 0.022787 | -1006.707046 | 18.23 | 143.57                 | 142.27       | 144.33     | 2     |
| <b>150</b> | -1006.725950 | 0.067707 | -1006.658243 | 0.024804 | -1006.701146 | 8.70  | 146.01                 | 145.88       | 148.03     | 0     |
| <b>151</b> | -1006.711524 | 0.063137 | -1006.648388 | 0.016219 | -1006.695305 | 1.76  | 155.06                 | 152.06       | 151.70     | 1     |
| <b>152</b> | -1006.707712 | 0.062252 | -1006.645460 | 0.016346 | -1006.691366 | 1.57  | 157.45                 | 153.90       | 154.17     | 0     |
| <b>153</b> | -1006.700389 | 0.065679 | -1006.634711 | 0.022475 | -1006.677914 | 6.73  | 162.04                 | 160.64       | 162.61     | 0     |
| <b>154</b> | -1006.695426 | 0.067663 | -1006.627763 | 0.025377 | -1006.670049 | 2.07  | 165.16                 | 165.00       | 167.55     | 0     |
| <b>155</b> | -1006.681623 | 0.062410 | -1006.619212 | 0.015379 | -1006.666244 | 2.41  | 173.82                 | 170.37       | 169.94     | 0     |
| <b>156</b> | -1006.673615 | 0.067007 | -1006.606608 | 0.021023 | -1006.652592 | 16.60 | 178.85                 | 178.28       | 178.50     | 0     |
| <b>157</b> | -1006.653705 | 0.060943 | -1006.592763 | 0.010172 | -1006.643533 | 0.28  | 191.34                 | 186.97       | 184.19     | 0     |
| <b>158</b> | -1006.663171 | 0.071320 | -1006.591851 | 0.032624 | -1006.630547 | 0.01  | 185.40                 | 187.54       | 192.34     | 0     |
| <b>159</b> | -1006.629674 | 0.069447 | -1006.560226 | 0.030443 | -1006.599231 | 14.30 | 206.42                 | 207.38       | 211.99     | 1     |
| <b>160</b> | -1006.612046 | 0.066021 | -1006.546025 | 0.019005 | -1006.593041 | 2.69  | 217.48                 | 216.30       | 215.87     | 0     |
| <b>161</b> | -1006.607174 | 0.071217 | -1006.535957 | 0.034411 | -1006.572763 | 19.95 | 220.54                 | 222.61       | 228.60     | 3     |

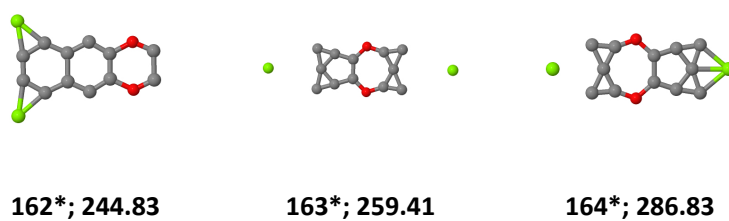

Figure S14: Isomers **162-164** of  $C_{12}O_2Mg_2$  considered on the singlet PES. Relative energies including ZPVE corrections (in  $\text{kcal mol}^{-1}$ ) are calculated at the PBE0-D3/def2-TZVP level. Isomers identified by chemical intuition are marked with an asterisk whereas unmarked ones are from AUTOMATON.

Table S10: Total energy ( $E$ ), zero-point vibrational energy ( $ZPVE$ ),  $ZPVE$ -corrected total energy ( $E+ZPVE$ ), thermal correction to Gibbs free energy ( $G$ ), sum of electronic and thermal Free energies ( $E + G$ ), net dipole moment ( $\mu$ ), relative energy without ZPVE-correction ( $\Delta E_e$ ), ZPVE-corrected relative energy ( $\Delta E_0$ ), and number of imaginary frequencies of  $C_{12}O_2Mg_2$  isomers (**162-164**) in their respective singlet ground electronic states calculated at the PBE0-D3/def2-TZVP level of theory.

| Isomer     | $E$          | $ZPVE$   | $E+ZPVE$     | $G$      | $E + G$      | $\mu$ | $\Delta E_e$           | $\Delta E_0$ | $\Delta G$ | NImag |
|------------|--------------|----------|--------------|----------|--------------|-------|------------------------|--------------|------------|-------|
|            | a.u          |          |              |          |              | Debye | kcal mol <sup>-1</sup> |              |            |       |
| <b>162</b> | -1006.565175 | 0.064619 | -1006.500556 | 0.025458 | -1006.539717 | 14.42 | 246.89                 | 244.83       | 249.33     | 1     |
| <b>163</b> | -1006.542967 | 0.065647 | -1006.477320 | 0.021244 | -1006.521723 | 0.18  | 260.83                 | 259.41       | 260.62     | 2     |
| <b>164</b> | -1006.497508 | 0.063881 | -1006.433627 | 0.028279 | -1006.469229 | 6.86  | 289.35                 | 286.83       | 293.56     | 5     |

Optimized geometries of C12O2Mg2 (singlets) obtained at the PBE0-D3/def2-TZVP level

16

isomer 1 (t21) scf done: -1006.958624

|    |           |           |           |
|----|-----------|-----------|-----------|
| C  | -1.981691 | -1.330069 | -0.191075 |
| O  | 6.528782  | -0.241915 | -0.124704 |
| C  | -4.118835 | 0.071464  | 0.075825  |
| C  | 5.381922  | -0.070529 | -0.079291 |
| C  | -3.117189 | -0.862228 | -0.095463 |
| C  | 1.953469  | 1.385161  | 0.216538  |
| O  | -6.556916 | 0.298427  | 0.142910  |
| C  | 3.089424  | 0.918190  | 0.121266  |
| C  | -5.409912 | 0.127225  | 0.100585  |
| C  | 0.668018  | 1.808600  | 0.307158  |
| Mg | -2.363090 | 1.209029  | 0.247252  |
| C  | 4.090947  | -0.014937 | -0.052807 |
| C  | -0.696141 | -1.753569 | -0.280980 |
| C  | -0.538227 | 2.033374  | 0.362574  |
| C  | 0.510214  | -1.977861 | -0.336485 |
| Mg | 2.334725  | -1.153100 | -0.217730 |

16

isomer 2 (c79) scf done: -1006.955368

|    |           |           |           |
|----|-----------|-----------|-----------|
| C  | -3.083469 | 0.632674  | -0.055606 |
| Mg | -1.528399 | 2.078458  | -0.033417 |
| C  | 0.086169  | 3.266131  | 0.000962  |
| C  | 1.305841  | 3.433577  | 0.020905  |
| Mg | 3.179211  | 2.720637  | 0.042534  |
| C  | 5.063761  | 1.742747  | 0.064495  |
| C  | 4.163874  | 0.707038  | 0.044273  |
| C  | 3.072201  | 0.128830  | 0.024375  |
| C  | 1.817369  | -0.348256 | 0.003326  |
| C  | 0.604137  | -0.513659 | -0.014466 |
| C  | -0.732698 | -0.389861 | -0.031880 |
| C  | -1.939358 | -0.124663 | -0.044861 |
| C  | -4.368520 | 0.497144  | -0.069489 |
| O  | -5.528900 | 0.499084  | -0.082150 |
| C  | 6.338239  | 1.955397  | 0.085558  |
| O  | 7.455844  | 2.267224  | 0.104887  |

16

isomer 3 (t3) scf done: -1006.950734

|    |           |           |           |
|----|-----------|-----------|-----------|
| O  | -5.613861 | -2.288338 | -0.025087 |
| O  | 5.218324  | -1.856399 | 0.100513  |
| C  | -4.547018 | -1.829441 | -0.019312 |
| C  | 4.168069  | -1.364687 | 0.081031  |
| C  | -3.419218 | -1.199105 | -0.015767 |
| Mg | -2.575898 | 0.702754  | -0.038499 |
| C  | 2.259109  | 3.264726  | -0.012193 |
| C  | -2.065621 | -1.477176 | 0.006249  |
| C  | 3.055472  | -0.693634 | 0.058572  |
| C  | -1.453243 | 2.364986  | -0.048614 |
| Mg | 2.881542  | 1.366072  | 0.025885  |
| C  | -0.842878 | -1.321282 | 0.019062  |
| C  | 1.717127  | -1.058125 | 0.047330  |
| C  | -0.304319 | 2.789605  | -0.040041 |
| C  | 1.034136  | 3.069409  | -0.025815 |



|                                      |           |           |           |
|--------------------------------------|-----------|-----------|-----------|
| C                                    | 0.502880  | -1.197593 | 0.034340  |
| 16                                   |           |           |           |
| isomer 4 (t7) scf done: -1006.943620 |           |           |           |
| O                                    | 7.259255  | -0.604520 | 0.023239  |
| O                                    | -6.425611 | -1.171750 | 0.010559  |
| C                                    | 6.095150  | -0.570971 | 0.021075  |
| C                                    | -5.285937 | -0.956415 | 0.009916  |
| C                                    | -4.047325 | -0.582808 | 0.007825  |
| C                                    | 4.823469  | -0.529798 | 0.018820  |
| Mg                                   | -2.783452 | 1.093918  | -0.008447 |
| C                                    | 2.269021  | -0.430544 | 0.012757  |
| C                                    | -2.784447 | -1.131244 | 0.015402  |
| C                                    | 1.024188  | -0.968824 | 0.017706  |
| C                                    | -1.167606 | 2.315880  | -0.023028 |
| C                                    | 3.544679  | -0.539321 | 0.016551  |
| C                                    | -0.111106 | 2.976081  | -0.032521 |
| C                                    | -0.205647 | -1.111831 | 0.018112  |
| C                                    | -1.548516 | -1.166070 | 0.017342  |
| Mg                                   | 1.003417  | 1.306845  | -0.011879 |

|                                      |           |           |           |
|--------------------------------------|-----------|-----------|-----------|
| 16                                   |           |           |           |
| isomer 5 (t2) scf done: -1006.939033 |           |           |           |
| C                                    | 3.680828  | -0.769768 | -0.001411 |
| C                                    | 1.301792  | 2.541582  | 0.001434  |
| C                                    | 1.202562  | -1.496164 | 0.000053  |
| O                                    | -5.168471 | -0.518894 | 0.004190  |
| C                                    | -4.524571 | 0.561685  | 0.004681  |
| C                                    | -1.363902 | -1.778213 | 0.001557  |
| Mg                                   | -3.249866 | -1.123749 | 0.002825  |
| C                                    | 2.421412  | -1.332658 | -0.000698 |
| Mg                                   | 2.527663  | 0.964041  | -0.000323 |
| C                                    | -1.276066 | 2.458760  | 0.003664  |
| C                                    | 0.071515  | 2.588248  | 0.002504  |
| C                                    | 4.913717  | -1.160308 | -0.002996 |
| C                                    | -3.572433 | 1.344497  | 0.004523  |
| O                                    | 6.050428  | -1.391614 | -0.004463 |
| C                                    | -2.432039 | 2.071021  | 0.003938  |
| C                                    | -0.140041 | -1.686583 | 0.000802  |

|                                       |           |           |           |
|---------------------------------------|-----------|-----------|-----------|
| 16                                    |           |           |           |
| isomer 6 (c77) scf done: -1006.934599 |           |           |           |
| O                                     | -3.787765 | -1.616831 | -0.134945 |
| C                                     | -3.926527 | -0.371023 | -0.108842 |
| C                                     | -3.668996 | 0.834752  | -0.098301 |
| C                                     | -3.148623 | 2.078272  | -0.097032 |
| C                                     | -2.383101 | 3.032632  | -0.109907 |
| C                                     | -1.262929 | 3.767134  | -0.139810 |
| C                                     | -0.098070 | 4.144709  | -0.177182 |
| C                                     | 1.243146  | 4.189074  | -0.226795 |
| C                                     | 2.473274  | 4.071591  | -0.274809 |
| C                                     | 3.694538  | 3.450296  | -0.331119 |
| C                                     | 4.956006  | 3.725134  | -0.373496 |
| O                                     | 6.109570  | 3.847636  | -0.414457 |
| Mg                                    | 2.293316  | 1.847227  | -0.306451 |
| C                                     | 1.050919  | 0.258185  | -0.288441 |
| C                                     | 0.059556  | -0.469703 | -0.259403 |
| Mg                                    | -1.876217 | -0.958991 | -0.195604 |

16  
 isomer 7 (c26) scf done: -1006.929617

|    |           |           |           |
|----|-----------|-----------|-----------|
| C  | -0.786235 | 2.673546  | 0.001216  |
| C  | -1.185218 | 1.346430  | 0.002730  |
| C  | -1.202386 | 0.119937  | 0.003349  |
| C  | -0.705416 | -1.134896 | 0.002950  |
| C  | 0.230864  | -1.932383 | 0.001447  |
| C  | 1.587845  | -2.126347 | -0.001194 |
| C  | 2.765638  | -1.703976 | -0.003775 |
| Mg | 1.586564  | 0.084533  | -0.002331 |
| O  | 1.471755  | 1.947145  | -0.003068 |
| C  | 0.637305  | 2.915207  | -0.001874 |
| O  | 1.097459  | 4.119098  | -0.003409 |
| Mg | 0.166062  | 5.744185  | -0.002308 |
| C  | -1.188145 | 7.363325  | -0.000341 |
| C  | -1.892271 | 6.331052  | 0.001635  |
| C  | -2.029191 | 4.957619  | 0.002628  |
| C  | -1.608609 | 3.808019  | 0.002345  |

16  
 isomer 8 (t63) scf done: -1006.928290

|    |           |           |           |
|----|-----------|-----------|-----------|
| O  | -5.918093 | -1.196313 | -0.335854 |
| C  | 2.771959  | 3.178741  | 1.157035  |
| C  | -4.757213 | -1.153369 | -0.374336 |
| C  | 2.147340  | 2.087768  | 0.708647  |
| C  | -3.479281 | -0.990021 | -0.365137 |
| O  | 3.299873  | 4.120981  | 1.544933  |
| C  | -2.324023 | -1.656405 | -0.717624 |
| C  | 2.841916  | 0.974022  | 0.181149  |
| C  | -1.114352 | -1.888775 | -0.880860 |
| C  | 3.067274  | -0.111827 | -0.309713 |
| Mg | 0.804507  | -2.413626 | -1.210131 |
| C  | 3.009454  | -1.359873 | -0.857734 |
| Mg | -1.854355 | 0.291013  | 0.119742  |
| C  | 0.728714  | 1.967326  | 0.729190  |
| C  | -0.439074 | 1.622998  | 0.638523  |
| C  | 2.811941  | -2.484792 | -1.344064 |

16  
 isomer 9 (c82) scf done: -1006.928271

|    |           |           |           |
|----|-----------|-----------|-----------|
| C  | -1.178070 | -2.658227 | -0.443156 |
| O  | 5.680409  | -0.426263 | -0.143641 |
| C  | -3.677533 | 0.320316  | 0.112462  |
| C  | 4.537546  | -0.335009 | -0.112285 |
| Mg | -2.773469 | -1.456481 | -0.211149 |
| C  | 1.619002  | 1.777922  | 0.297184  |
| O  | -6.133781 | 0.515746  | 0.179554  |
| C  | 2.542473  | 1.003502  | 0.149087  |
| C  | -4.965507 | 0.422842  | 0.147651  |
| C  | 0.440245  | 2.440561  | 0.429138  |
| Mg | -2.487077 | 1.929926  | 0.378765  |
| C  | 3.205666  | -0.228892 | -0.075808 |
| C  | 0.029084  | -2.424404 | -0.418281 |
| C  | -0.711340 | 2.862905  | 0.518594  |
| C  | 1.303310  | -1.957384 | -0.353455 |
| C  | 2.344540  | -1.339799 | -0.259086 |

16

isomer 10 (t4) scf done: -1006.928890

|    |           |           |           |
|----|-----------|-----------|-----------|
| O  | 3.034757  | 1.406220  | -0.019342 |
| O  | -4.483109 | -1.507478 | 0.006181  |
| C  | 0.675994  | 1.497839  | -0.013304 |
| C  | -3.252263 | -1.793669 | 0.003889  |
| C  | 1.884735  | 0.762608  | -0.014651 |
| C  | -0.674707 | -1.554089 | -0.002708 |
| C  | -0.465538 | 1.912141  | -0.011368 |
| C  | -2.025883 | -1.692038 | 0.000733  |
| Mg | 4.527883  | 0.274625  | -0.023474 |
| C  | 0.497761  | -1.236286 | -0.006272 |
| C  | 1.767582  | -0.634177 | -0.011022 |
| C  | 4.194776  | -1.698664 | -0.016065 |
| C  | -1.812088 | 2.107384  | -0.007993 |
| C  | 3.002903  | -1.343676 | -0.013204 |
| C  | -3.048286 | 2.196815  | -0.004923 |
| Mg | -3.660288 | 0.294290  | 0.000485  |

16

isomer 11 (c73) scf done: -1006.926160

|    |           |           |           |
|----|-----------|-----------|-----------|
| C  | -1.136466 | 2.040868  | 0.001149  |
| C  | -2.262586 | 1.567288  | 0.001678  |
| C  | -3.374720 | 0.800833  | 0.003172  |
| C  | -4.354937 | 0.052387  | -0.002441 |
| Mg | -3.188175 | -1.721525 | -0.000721 |
| C  | -1.382140 | -2.568473 | -0.000592 |
| C  | -0.164691 | -2.425255 | -0.000691 |
| C  | 1.166401  | -2.133355 | -0.000417 |
| C  | 2.332057  | -1.753986 | 0.000191  |
| Mg | 3.618851  | -0.229809 | -0.000979 |
| C  | 3.931309  | 1.870872  | 0.003620  |
| O  | 5.002301  | 1.209116  | 0.007029  |
| C  | 2.727655  | 2.139266  | -0.003648 |
| C  | 1.396814  | 2.369676  | -0.001248 |
| C  | 0.175861  | 2.328570  | -0.000495 |
| O  | -5.049287 | -0.997631 | -0.005605 |

16

isomer 12 (c60) scf done: -1006.925604

|    |           |           |           |
|----|-----------|-----------|-----------|
| C  | 2.136272  | 1.423520  | -0.022044 |
| Mg | 3.580316  | 0.047576  | -0.026636 |
| C  | 5.658897  | -0.559638 | -0.040608 |
| O  | 4.778809  | -1.472296 | -0.028246 |
| C  | 2.560529  | 2.583042  | -0.033643 |
| C  | 3.138999  | 3.808015  | -0.046894 |
| C  | 3.855763  | 4.791503  | -0.059714 |
| C  | 4.850968  | 5.713600  | -0.074268 |
| C  | 5.815272  | 6.491792  | -0.087536 |
| Mg | 7.407420  | 5.271943  | -0.090924 |
| C  | 9.974938  | 3.824853  | -0.098475 |
| O  | 11.104977 | 4.093263  | -0.107671 |
| C  | 8.685153  | 3.659554  | -0.088895 |
| C  | 7.893161  | 2.509797  | -0.075864 |
| C  | 7.110265  | 1.576862  | -0.064346 |
| C  | 6.262116  | 0.511861  | -0.051461 |

16

isomer 13 (c28) scf done: -1006.927838

|    |           |           |           |
|----|-----------|-----------|-----------|
| C  | -0.653385 | 2.555082  | -0.001126 |
| C  | -1.093245 | 1.227254  | -0.007916 |
| C  | -1.245579 | 0.019948  | -0.012995 |
| C  | -1.001630 | -1.322518 | -0.016869 |
| C  | -0.604485 | -2.506146 | -0.019375 |
| Mg | 1.258005  | -1.788973 | -0.008637 |
| O  | 2.658380  | -0.521360 | 0.002192  |
| C  | 2.159408  | 0.638515  | 0.004318  |
| C  | 1.640548  | 1.739583  | 0.006029  |
| C  | 0.742053  | 2.822974  | 0.005967  |
| O  | 1.202610  | 4.041736  | 0.012468  |
| Mg | 0.254163  | 5.649144  | 0.014170  |
| C  | -1.135382 | 7.248498  | 0.013890  |
| C  | -1.816375 | 6.201022  | 0.007055  |
| C  | -1.928457 | 4.825351  | 0.001536  |
| C  | -1.490612 | 3.682383  | -0.000707 |

16

isomer 14 (t6) scf done: -1006.924885

|    |           |           |           |
|----|-----------|-----------|-----------|
| C  | 3.615184  | 0.330725  | -0.007767 |
| Mg | -4.507837 | 0.254381  | 0.008202  |
| C  | 4.883833  | 0.145709  | -0.013955 |
| O  | -3.798922 | 1.995115  | 0.022683  |
| C  | 2.337472  | 0.391652  | -0.001882 |
| C  | -4.729132 | -1.719720 | -0.002783 |
| Mg | 0.752403  | -1.013105 | -0.001509 |
| C  | -2.536597 | 1.905638  | 0.019325  |
| C  | 6.147061  | 0.011336  | -0.019449 |
| C  | -3.509787 | -1.962510 | -0.005477 |
| O  | 7.307090  | -0.117030 | -0.024549 |
| C  | -1.325358 | 1.760212  | 0.015638  |
| C  | 1.188191  | 1.142270  | 0.005213  |
| C  | -2.155800 | -2.160953 | -0.007634 |
| C  | -0.931834 | -2.125256 | -0.008460 |
| C  | -0.016162 | 1.427260  | 0.010525  |

16

isomer 15 (t5) scf done: -1006.925134

|    |           |           |           |
|----|-----------|-----------|-----------|
| Mg | -2.311915 | 1.750340  | -0.011428 |
| C  | 2.804176  | 1.443194  | 0.000824  |
| Mg | 1.408949  | -2.344058 | 0.019427  |
| C  | -3.939904 | -0.688798 | 0.018385  |
| C  | 3.541756  | -2.225338 | 0.018846  |
| C  | -2.703750 | -0.282096 | 0.009770  |
| C  | 3.319977  | 0.335031  | 0.006064  |
| C  | -0.449484 | 3.442833  | -0.011143 |
| O  | 3.140380  | -3.409161 | 0.024688  |
| C  | 3.552457  | -0.992088 | 0.012991  |
| O  | -5.074009 | -0.937203 | 0.025102  |
| C  | -0.423626 | -1.583409 | 0.015744  |
| C  | 1.886690  | 2.422622  | -0.004424 |
| C  | -1.515332 | -1.024982 | 0.013337  |
| C  | -1.673963 | 3.659493  | -0.012522 |
| C  | 0.858166  | 3.080916  | -0.008310 |

16

isomer 16 (c46) scf done: -1006.921186

|   |          |          |           |
|---|----------|----------|-----------|
| C | 2.307128 | 1.614980 | -0.019187 |
|---|----------|----------|-----------|

|    |           |           |           |
|----|-----------|-----------|-----------|
| C  | 2.751396  | 2.896164  | -0.028954 |
| C  | 3.282196  | 4.007420  | -0.039212 |
| O  | 3.479208  | 5.255410  | -0.046541 |
| Mg | 1.523070  | 5.240126  | -0.026557 |
| C  | -0.458381 | 5.444765  | -0.007547 |
| C  | -1.236518 | 4.489706  | 0.003026  |
| C  | -1.975415 | 3.355842  | 0.014163  |
| C  | -2.433197 | 2.227355  | 0.022683  |
| C  | -2.693197 | 0.899188  | 0.030411  |
| C  | -2.799722 | -0.328103 | 0.036320  |
| Mg | -1.238256 | -1.565091 | 0.028619  |
| O  | 0.152414  | -2.941519 | 0.021481  |
| C  | 0.881439  | -1.909628 | 0.009764  |
| C  | 1.275031  | -0.742639 | 0.000994  |
| C  | 1.849135  | 0.485881  | -0.009881 |

16

|                 |                        |           |           |
|-----------------|------------------------|-----------|-----------|
| isomer 17 (t12) | scf done: -1006.921702 |           |           |
| C               | 4.136557               | -1.324779 | -0.026904 |
| C               | -2.126339              | -2.384680 | 0.018775  |
| C               | 2.903454               | -0.944920 | -0.022387 |
| O               | 1.087537               | 4.484316  | -0.034380 |
| C               | 2.194196               | 0.246842  | -0.016314 |
| C               | -2.253531              | 1.560628  | 0.036462  |
| O               | 5.209959               | -1.770112 | -0.031850 |
| C               | 1.294803               | 1.076869  | -0.010204 |
| C               | -4.609994              | -1.592775 | 0.053432  |
| C               | -0.902555              | -2.431499 | 0.003264  |
| C               | -3.455714              | -2.056475 | 0.036803  |
| Mg              | 0.953204               | -1.657824 | -0.011338 |
| C               | 0.327577               | 2.118254  | -0.003765 |
| C               | 0.739491               | 3.389281  | -0.020596 |
| C               | -1.070149              | 1.861083  | 0.018210  |
| Mg              | -3.785748              | 0.260613  | 0.050905  |

16

|                 |                        |           |           |
|-----------------|------------------------|-----------|-----------|
| isomer 18 (c30) | scf done: -1006.923853 |           |           |
| C               | -0.735247              | 2.660870  | 0.003503  |
| C               | -1.274302              | 1.351401  | 0.007888  |
| C               | -1.694694              | 0.197986  | 0.011392  |
| Mg              | -0.626041              | -1.465388 | 0.006647  |
| O               | 0.709075               | -2.987223 | 0.000054  |
| C               | 1.443653               | -1.968695 | -0.005211 |
| C               | 1.816230               | -0.796494 | -0.008457 |
| C               | 1.803414               | 0.557897  | -0.009627 |
| C               | 1.471031               | 1.728252  | -0.008746 |
| C               | 0.655438               | 2.882858  | -0.004987 |
| O               | 1.193741               | 4.072506  | -0.009222 |
| Mg              | 0.324888               | 5.722953  | -0.005508 |
| C               | -0.999580              | 7.377458  | 0.000836  |
| C               | -1.723476              | 6.359254  | 0.006034  |
| C               | -1.899439              | 4.990923  | 0.008303  |
| C               | -1.518669              | 3.827934  | 0.007100  |

16

|                 |                        |           |          |
|-----------------|------------------------|-----------|----------|
| isomer 19 (c43) | scf done: -1006.919851 |           |          |
| C               | 2.017588               | 0.892245  | 0.053694 |
| C               | 1.067373               | -0.053246 | 0.024698 |

|    |           |           |           |
|----|-----------|-----------|-----------|
| C  | 0.084626  | -0.777913 | -0.004743 |
| C  | -1.155114 | -1.324651 | -0.040702 |
| C  | -2.311293 | -1.780793 | -0.073918 |
| Mg | -3.386954 | -0.111501 | -0.099436 |
| O  | -4.122417 | 1.603383  | -0.115240 |
| C  | -3.245839 | 2.520537  | -0.088794 |
| C  | -2.374646 | 3.369301  | -0.062588 |
| C  | -1.317070 | 4.221673  | -0.031121 |
| C  | -0.331120 | 4.953662  | -0.001813 |
| Mg | 1.615138  | 5.266248  | 0.053368  |
| O  | 3.583700  | 5.582621  | 0.110336  |
| C  | 3.570277  | 4.329548  | 0.106654  |
| C  | 3.215398  | 3.150948  | 0.093401  |
| C  | 2.689272  | 1.912989  | 0.075270  |

16

isomer 20 (c37) scf done: -1006.921028

|    |           |           |           |
|----|-----------|-----------|-----------|
| Mg | 1.803352  | -1.110671 | -0.001881 |
| O  | 1.086786  | -3.001737 | -0.004044 |
| C  | 0.055833  | -2.270973 | -0.003984 |
| C  | -0.640936 | -1.257443 | -0.003425 |
| C  | -1.041245 | 0.043708  | -0.002515 |
| C  | -1.045715 | 1.258781  | -0.001406 |
| C  | -0.628399 | 2.603618  | 0.000059  |
| C  | -1.472424 | 3.729766  | 0.000561  |
| C  | -1.902648 | 4.874366  | 0.001317  |
| C  | -1.792747 | 6.249485  | 0.002603  |
| C  | -1.121424 | 7.302830  | 0.003924  |
| Mg | 0.288269  | 5.721630  | 0.003375  |
| O  | 1.227478  | 4.110700  | 0.002497  |
| C  | 0.745935  | 2.895734  | 0.001180  |
| C  | 1.658548  | 1.799036  | 0.000635  |
| C  | 2.378259  | 0.806219  | 0.000170  |

16

isomer 21 (t1) scf done: -1006.919053

|    |           |           |           |
|----|-----------|-----------|-----------|
| C  | 3.852200  | 1.085037  | -0.000397 |
| C  | -4.294319 | 1.291500  | -0.001830 |
| C  | 2.994319  | 2.118903  | 0.000668  |
| C  | -3.051661 | 1.222271  | -0.001073 |
| C  | 1.806380  | 2.436876  | 0.000609  |
| Mg | -4.137489 | -0.689019 | -0.002075 |
| C  | 4.193388  | -0.092793 | -0.000140 |
| C  | -1.681602 | 0.836387  | -0.000464 |
| C  | 3.299524  | -2.537886 | -0.000062 |
| O  | -0.226594 | -1.027522 | -0.000363 |
| C  | 3.827290  | -1.406411 | -0.001368 |
| Mg | 1.445521  | -1.737204 | -0.000638 |
| C  | 0.475675  | 2.288691  | 0.000628  |
| C  | -1.428019 | -0.568669 | -0.000712 |
| C  | -0.602742 | 1.708092  | 0.000184  |
| O  | -2.402230 | -1.429777 | -0.001485 |

16

isomer 22 (c39) scf done: -1006.917899

|    |          |           |           |
|----|----------|-----------|-----------|
| C  | 2.198470 | -0.839268 | -0.002331 |
| C  | 2.104047 | -2.081903 | -0.002087 |
| Mg | 0.100135 | -1.876472 | -0.002044 |

|    |           |           |           |
|----|-----------|-----------|-----------|
| O  | -1.681435 | -1.272474 | -0.002438 |
| C  | -1.444507 | -0.014770 | -0.001741 |
| C  | -1.114911 | 1.154396  | -0.001187 |
| C  | -0.604141 | 2.473254  | -0.000480 |
| C  | -1.427093 | 3.617531  | 0.000725  |
| C  | -1.851421 | 4.764553  | 0.001633  |
| C  | -1.728441 | 6.138141  | 0.004227  |
| C  | -1.051720 | 7.188176  | 0.005765  |
| Mg | 0.349687  | 5.594490  | 0.003465  |
| O  | 1.269970  | 3.980058  | 0.000210  |
| C  | 0.766375  | 2.766123  | -0.000416 |
| C  | 1.624927  | 1.643229  | -0.001422 |
| C  | 2.088977  | 0.519986  | -0.002811 |

16

isomer 23 (c8) scf done: -1006.918010

|    |           |           |           |
|----|-----------|-----------|-----------|
| C  | -0.599476 | 2.474140  | 0.000888  |
| C  | -1.112366 | 1.200050  | 0.002746  |
| C  | -1.373922 | -0.008717 | 0.004017  |
| C  | -0.861832 | -1.228661 | 0.003364  |
| C  | 0.054917  | -2.083589 | 0.001950  |
| C  | 1.320288  | -1.650517 | -0.001234 |
| C  | 2.230205  | -0.799257 | -0.003361 |
| C  | 2.105886  | 0.542105  | -0.003779 |
| C  | 1.731010  | 1.713281  | -0.003162 |
| C  | 0.819587  | 2.766299  | -0.001887 |
| O  | 1.204238  | 4.003112  | -0.003450 |
| Mg | 0.113977  | 5.538892  | -0.002117 |
| O  | -0.664275 | 7.206837  | -0.001530 |
| Mg | -2.370350 | 6.645152  | 0.002228  |
| C  | -2.177098 | 4.602534  | 0.003064  |
| C  | -1.474771 | 3.590831  | 0.002262  |

16

isomer 24 (t38) scf done: -1006.917084

|    |           |           |           |
|----|-----------|-----------|-----------|
| O  | 3.635422  | 0.541453  | 0.448251  |
| C  | -3.598892 | 1.963285  | 0.222471  |
| C  | 2.106033  | -1.231150 | 0.080104  |
| C  | -2.261909 | 2.161188  | 0.363905  |
| C  | -0.415225 | -1.855873 | -0.249756 |
| C  | -4.790602 | 1.632355  | 0.072213  |
| C  | 0.776014  | -1.644791 | -0.116711 |
| C  | -1.050755 | 2.012166  | 0.424439  |
| C  | -1.766427 | -1.904728 | -0.369148 |
| C  | 0.229704  | 1.605257  | 0.449984  |
| C  | -2.992840 | -1.840809 | -0.455892 |
| Mg | -4.259903 | -0.296929 | -0.261594 |
| C  | 2.374339  | 0.119940  | 0.354256  |
| C  | 1.294575  | 1.011293  | 0.417486  |
| Mg | 4.577856  | -0.920070 | -0.238529 |
| O  | 3.116366  | -2.079785 | -0.084244 |

16

isomer 25 (t85) scf done: -1006.911137

|    |          |           |           |
|----|----------|-----------|-----------|
| O  | 2.486985 | 3.781371  | 0.139965  |
| Mg | 1.958400 | -2.931431 | -0.195487 |
| C  | 2.913024 | 2.597301  | 0.071197  |
| C  | 2.987707 | -1.215722 | -0.127251 |

|    |           |           |           |
|----|-----------|-----------|-----------|
| Mg | 0.800392  | 2.729730  | 0.115312  |
| C  | 0.342132  | -4.122796 | -0.226142 |
| C  | -1.051746 | 1.985943  | 0.109879  |
| O  | -5.232883 | 0.294246  | 0.096037  |
| C  | 2.933998  | 1.366701  | 0.007276  |
| C  | -4.095270 | 0.148139  | 0.068613  |
| C  | -1.909709 | 1.119422  | 0.080220  |
| C  | -0.569573 | -3.286407 | -0.168086 |
| C  | 3.027204  | 0.008754  | -0.064687 |
| C  | -2.199438 | -1.304997 | -0.038465 |
| C  | -2.768904 | -0.013023 | 0.037353  |
| C  | -1.506625 | -2.297405 | -0.101386 |

16

isomer 26 (c12) scf done: -1006.915333

|    |           |           |           |
|----|-----------|-----------|-----------|
| C  | -0.678044 | 2.418972  | -0.001905 |
| C  | -1.333390 | 1.203306  | -0.010887 |
| C  | -1.309308 | -0.037374 | -0.014399 |
| C  | -1.040902 | -1.344536 | -0.016502 |
| C  | 0.119100  | -1.843077 | -0.009747 |
| C  | 1.435139  | -1.960327 | 0.000213  |
| C  | 2.039247  | -0.831922 | 0.008604  |
| C  | 2.299295  | 0.441017  | 0.014467  |
| C  | 1.582946  | 1.488291  | 0.012551  |
| C  | 0.750364  | 2.509105  | 0.009208  |
| Mg | 0.836338  | 4.609522  | 0.012974  |
| O  | 0.817142  | 6.439747  | 0.011800  |
| Mg | -0.861699 | 7.037450  | 0.001900  |
| O  | -2.412095 | 5.937960  | -0.008496 |
| C  | -1.922139 | 4.768842  | -0.006155 |
| C  | -1.375976 | 3.675516  | -0.003628 |

16

isomer 27 (t10) scf done: -1006.912947

|    |           |           |           |
|----|-----------|-----------|-----------|
| Mg | -3.913345 | -1.381784 | 0.021711  |
| C  | 2.227328  | 2.112101  | 0.012295  |
| C  | -2.272049 | -2.505335 | 0.013405  |
| C  | 3.461380  | 2.006348  | 0.008736  |
| C  | -1.044051 | -2.456100 | 0.007043  |
| O  | 4.588823  | 1.456644  | 0.003159  |
| C  | -3.988428 | 1.090376  | 0.031255  |
| C  | 0.894949  | 2.339980  | 0.017689  |
| C  | -2.817343 | 1.775999  | 0.029520  |
| Mg | 3.312388  | -0.082862 | -0.002923 |
| C  | -1.653866 | 2.144324  | 0.026152  |
| C  | -0.325412 | 2.339952  | 0.022094  |
| C  | 0.312668  | -2.342235 | 0.000964  |
| O  | 2.746752  | -1.832398 | -0.009746 |
| C  | -4.984327 | 0.346685  | 0.033107  |
| C  | 1.503757  | -2.107811 | -0.004255 |

16

isomer 28 (t24) scf done: -1006.910815

|   |           |           |           |
|---|-----------|-----------|-----------|
| C | -2.970133 | 1.814193  | -0.015658 |
| C | 4.635918  | -1.641954 | 0.039148  |
| C | -3.881770 | 0.988899  | -0.032255 |
| C | 4.262763  | -0.453603 | 0.044454  |
| O | -4.605810 | -0.031411 | -0.048412 |



|    |           |           |           |
|----|-----------|-----------|-----------|
| C  | 3.748337  | 0.801665  | 0.049465  |
| C  | -1.813480 | 2.494805  | 0.002657  |
| C  | -1.253098 | -2.090963 | -0.029667 |
| C  | -0.650092 | 2.877953  | 0.018519  |
| Mg | 2.810222  | -2.459720 | 0.012492  |
| Mg | -2.873131 | -0.998023 | -0.037216 |
| C  | 2.949256  | 1.727911  | 0.048968  |
| C  | 0.686867  | 2.847397  | 0.033008  |
| C  | -0.108318 | -2.535878 | -0.019803 |
| C  | 1.867213  | 2.516805  | 0.043009  |
| O  | 1.064988  | -3.007303 | -0.010144 |

16

isomer 29 (t11) scf done: -1006.910852

|    |           |           |           |
|----|-----------|-----------|-----------|
| C  | 0.709226  | 2.538450  | -0.020776 |
| C  | 2.523622  | -1.877137 | -0.018305 |
| C  | -1.608844 | 1.431469  | -0.018001 |
| C  | 1.821897  | 3.065205  | -0.022002 |
| C  | 3.001361  | -0.749842 | -0.019790 |
| C  | -3.965756 | 1.041881  | -0.016573 |
| Mg | 2.914658  | 1.245343  | -0.021455 |
| C  | 1.157334  | -4.094297 | -0.014996 |
| C  | -2.511681 | -0.851245 | -0.014555 |
| C  | -0.545574 | 2.013572  | -0.019323 |
| C  | -2.721960 | 0.555914  | -0.016300 |
| O  | 3.072842  | 3.221484  | -0.023181 |
| C  | 1.835705  | -3.058445 | -0.016600 |
| Mg | -0.722062 | -3.389511 | -0.014444 |
| O  | -5.038010 | 1.454738  | -0.016751 |
| C  | -2.191872 | -2.029939 | -0.012930 |

16

isomer 30 (t8) scf done: -1006.911179

|    |           |           |           |
|----|-----------|-----------|-----------|
| C  | -4.285270 | 1.066298  | 0.001034  |
| C  | 2.966631  | 0.737494  | -0.014101 |
| C  | 3.056752  | -0.655846 | -0.011928 |
| C  | -0.653014 | -1.989162 | -0.001968 |
| C  | 1.842555  | -1.387335 | -0.008045 |
| Mg | 4.982472  | 0.482537  | -0.018454 |
| C  | -3.163494 | 1.579502  | -0.002100 |
| Mg | -3.483446 | -0.888311 | 0.002332  |
| C  | -0.662407 | 2.097871  | -0.008678 |
| O  | 4.227962  | -1.273709 | -0.013343 |
| O  | -5.181527 | 0.176131  | 0.004612  |
| C  | 0.664895  | 1.908866  | -0.011174 |
| C  | 0.684578  | -1.756802 | -0.004947 |
| C  | 1.796553  | 1.432729  | -0.012764 |
| C  | -1.878387 | -2.077747 | 0.000800  |
| C  | -1.884009 | 2.016488  | -0.005758 |

16

isomer 31 (c7) scf done: -1006.904427

|    |           |           |           |
|----|-----------|-----------|-----------|
| C  | -2.051376 | -0.833565 | -0.063883 |
| Mg | -3.425111 | 0.636807  | -0.098801 |
| O  | -4.998244 | 1.793818  | -0.140072 |
| C  | -4.050064 | 2.645131  | -0.112192 |
| C  | -2.914181 | 3.125857  | -0.079841 |
| C  | -1.761555 | 3.861513  | -0.045930 |

|    |           |           |           |
|----|-----------|-----------|-----------|
| C  | -0.707829 | 4.461603  | -0.014101 |
| C  | -0.821971 | -0.808263 | -0.029361 |
| C  | 0.499303  | -0.536447 | 0.008289  |
| C  | 1.607887  | -0.025643 | 0.040557  |
| C  | 2.624407  | 0.848981  | 0.071014  |
| C  | 3.359633  | 1.823762  | 0.094038  |
| C  | 3.816576  | 3.102209  | 0.110149  |
| C  | 4.113340  | 4.311811  | 0.122852  |
| Mg | 2.196110  | 4.903598  | 0.070221  |
| O  | 0.386036  | 5.099427  | 0.019682  |

16

isomer 32 (c41) scf done: -1006.906485

|    |           |           |           |
|----|-----------|-----------|-----------|
| C  | 1.912460  | -0.819839 | -0.000867 |
| C  | 1.599294  | -2.158280 | -0.002642 |
| C  | 0.782122  | -3.106885 | -0.004520 |
| Mg | -0.412328 | -1.395282 | -0.004049 |
| O  | -1.345838 | 0.279506  | -0.003238 |
| C  | -0.658855 | 1.343472  | -0.001421 |
| C  | -0.874007 | 2.740190  | -0.000268 |
| C  | -1.702798 | 3.833557  | -0.000137 |
| C  | -1.962611 | 5.039207  | 0.000730  |
| C  | -1.649709 | 6.377731  | 0.002397  |
| C  | -0.832520 | 7.326326  | 0.004210  |
| Mg | 0.361633  | 5.614323  | 0.003859  |
| O  | 1.296012  | 3.939942  | 0.003217  |
| C  | 0.609027  | 2.875974  | 0.001445  |
| C  | 0.824145  | 1.479254  | 0.000306  |
| C  | 1.652891  | 0.385849  | 0.000046  |

16

isomer 33 (t15) scf done: -1006.901879

|    |           |           |           |
|----|-----------|-----------|-----------|
| C  | -5.335525 | 1.099415  | 0.173681  |
| O  | 7.874564  | -0.596402 | -0.202947 |
| C  | -4.105040 | 1.287385  | 0.229210  |
| C  | 6.727587  | -0.409537 | -0.160867 |
| Mg | -5.004794 | -0.819852 | -0.302298 |
| C  | 5.466835  | -0.204313 | -0.114424 |
| C  | -1.492863 | -1.180903 | -0.374895 |
| C  | 4.212183  | 0.000330  | -0.067473 |
| C  | -2.651142 | -1.873775 | -0.555543 |
| C  | 2.947949  | 0.205625  | -0.020066 |
| C  | -0.508953 | -0.472666 | -0.198852 |
| C  | 1.703603  | 0.407865  | 0.026617  |
| C  | -3.771468 | -2.383106 | -0.684370 |
| C  | 0.380574  | 0.602466  | 0.071270  |
| O  | -0.223552 | 1.756842  | 0.356797  |
| Mg | -2.073246 | 1.409643  | 0.266035  |

16

isomer 34 (c83) scf done: -1006.901132

|    |           |           |           |
|----|-----------|-----------|-----------|
| C  | -0.810439 | -0.000000 | 0.967125  |
| C  | 0.522798  | -0.000000 | 0.969221  |
| C  | -1.534728 | -0.000000 | 2.191769  |
| C  | -1.530916 | -0.000000 | -0.259777 |
| C  | -2.281776 | -0.000000 | 3.159398  |
| C  | -2.274773 | -0.000000 | -1.229886 |
| Mg | -4.227288 | 0.000000  | 3.623981  |

|    |            |           |           |
|----|------------|-----------|-----------|
| Mg | -4.219792  | -0.000000 | -1.696213 |
| C  | -6.172459  | 0.000000  | 3.158303  |
| C  | -6.165454  | 0.000000  | -1.232296 |
| C  | -6.915612  | 0.000000  | 2.187637  |
| C  | -6.911811  | 0.000000  | -0.264115 |
| C  | -7.635917  | 0.000000  | 0.960637  |
| C  | -8.969166  | 0.000000  | 0.958547  |
| O  | 1.672059   | -0.000000 | 0.970946  |
| O  | -10.118423 | 0.000000  | 0.956728  |

16

isomer 35 (t65) scf done: -1006.899786

|    |           |           |           |
|----|-----------|-----------|-----------|
| Mg | 0.059889  | 0.752566  | 0.981949  |
| C  | 1.659670  | -0.131860 | 0.015721  |
| O  | -9.081130 | -0.309174 | 0.116779  |
| C  | 2.933796  | -0.110614 | 0.004894  |
| C  | -7.912832 | -0.289651 | 0.105532  |
| C  | 5.491014  | -0.068024 | -0.016689 |
| C  | -6.644030 | -0.268535 | 0.093407  |
| C  | 4.230787  | -0.088883 | -0.006171 |
| C  | -5.358225 | -0.247796 | 0.081481  |
| C  | 6.776815  | -0.046677 | -0.027551 |
| C  | -4.098001 | -0.227443 | 0.069718  |
| O  | 9.213962  | -0.006885 | -0.047482 |
| C  | -2.801010 | -0.206269 | 0.057422  |
| C  | 8.045639  | -0.025853 | -0.038035 |
| C  | -1.526887 | -0.185517 | 0.045336  |
| Mg | 0.072889  | -1.069897 | -0.920718 |

16

isomer 36 (c38) scf done: -1006.896847

|    |           |           |           |
|----|-----------|-----------|-----------|
| C  | 2.746290  | -0.525510 | -0.008958 |
| Mg | 1.275853  | -1.832304 | -0.002801 |
| O  | -0.589334 | -2.475091 | 0.004604  |
| C  | -0.883151 | -1.255511 | 0.005138  |
| C  | -1.009290 | -0.031354 | 0.004813  |
| C  | -0.454967 | 1.235018  | 0.002106  |
| C  | -0.749789 | 2.578357  | 0.002389  |
| C  | -1.650999 | 3.610272  | 0.005080  |
| C  | -1.962684 | 4.803564  | 0.005528  |
| C  | -1.717131 | 6.152403  | 0.003832  |
| C  | -0.978424 | 7.164373  | 0.000546  |
| Mg | 0.361046  | 5.566522  | -0.003430 |
| O  | 1.372125  | 3.959679  | -0.006173 |
| C  | 0.772524  | 2.835888  | -0.003318 |
| C  | 1.048165  | 1.482741  | -0.003588 |
| C  | 2.018683  | 0.485999  | -0.006702 |

16

37 (t29) scf done: -1006.895684

|   |           |           |          |
|---|-----------|-----------|----------|
| C | 3.743150  | 0.284719  | 0.015028 |
| O | -5.143115 | 1.800756  | 0.032489 |
| C | 5.024299  | 0.131829  | 0.009039 |
| C | -4.224361 | 1.078412  | 0.021519 |
| O | 6.159282  | -0.127291 | 0.002396 |

|    |           |           |           |
|----|-----------|-----------|-----------|
| C  | -3.268086 | 0.208299  | 0.007924  |
| Mg | 1.909579  | -0.771478 | 0.002547  |
| Mg | -3.159268 | -1.838069 | -0.024273 |
| C  | 0.051790  | -1.696286 | -0.016721 |
| C  | -1.794865 | 0.301719  | 0.011526  |
| C  | 2.772109  | 1.270633  | 0.029987  |
| C  | -0.884306 | 1.381808  | 0.030003  |
| C  | 0.266108  | 1.805610  | 0.037395  |
| C  | -1.162381 | -2.319737 | -0.028308 |
| C  | -1.099325 | -0.870464 | -0.005546 |
| C  | 1.615955  | 1.705761  | 0.038191  |

16

|                    |              |           |           |
|--------------------|--------------|-----------|-----------|
| 38 (c42) scf done: | -1006.894807 |           |           |
| C                  | 1.927990     | -0.688085 | -0.002529 |
| C                  | 1.289833     | -1.735648 | -0.003539 |
| C                  | 0.075583     | -2.361766 | -0.004291 |
| C                  | -1.166512    | -2.508439 | -0.004587 |
| Mg                 | -1.064830    | -0.427495 | -0.002633 |
| O                  | -1.067037    | 1.385567  | -0.000999 |
| C                  | -0.559935    | 2.601043  | 0.000292  |
| C                  | -1.406073    | 3.735774  | 0.001292  |
| C                  | -1.831695    | 4.882994  | 0.002435  |
| C                  | -1.722485    | 6.254964  | 0.003775  |
| C                  | -1.064735    | 7.317317  | 0.004894  |
| Mg                 | 0.378885     | 5.760706  | 0.003500  |
| O                  | 1.289754     | 4.157681  | 0.002049  |
| C                  | 0.803965     | 2.921882  | 0.000799  |
| C                  | 1.657534     | 1.806587  | -0.000200 |
| C                  | 2.058677     | 0.651965  | -0.001192 |

16

|                    |              |           |           |
|--------------------|--------------|-----------|-----------|
| 39 (c49) scf done: | -1006.894788 |           |           |
| C                  | -0.601367    | 2.642389  | -0.006248 |
| O                  | -1.099977    | 1.423111  | -0.017527 |
| Mg                 | -1.135740    | -0.387543 | -0.026547 |
| C                  | -1.172926    | -2.463593 | -0.039053 |
| C                  | 0.066163     | -2.299098 | -0.014343 |
| C                  | 1.281176     | -1.675914 | 0.011579  |
| C                  | 1.915250     | -0.626555 | 0.027800  |
| C                  | 2.035594     | 0.714205  | 0.035208  |
| C                  | 1.623250     | 1.864586  | 0.031476  |
| C                  | 0.759739     | 2.972155  | 0.018841  |
| O                  | 1.235589     | 4.211720  | 0.030155  |
| Mg                 | 0.314240     | 5.808529  | 0.017447  |
| C                  | -1.140806    | 7.355027  | -0.005633 |
| C                  | -1.789780    | 6.287490  | -0.019631 |
| C                  | -1.889595    | 4.914875  | -0.024445 |
| C                  | -1.454790    | 3.771108  | -0.019080 |

16

|                    |              |           |           |
|--------------------|--------------|-----------|-----------|
| 40 (c32) scf done: | -1006.894739 |           |           |
| C                  | -0.771099    | 2.823477  | -0.008709 |
| Mg                 | -0.728479    | 0.779144  | -0.012228 |
| O                  | -1.601197    | -1.027748 | -0.029002 |
| C                  | -0.740785    | -1.896224 | -0.018065 |
| C                  | 0.290133     | -2.620110 | -0.004347 |
| C                  | 1.310223     | -1.703723 | 0.012352  |

|    |           |           |           |
|----|-----------|-----------|-----------|
| C  | 1.986461  | -0.668039 | 0.024254  |
| C  | 1.777171  | 0.675394  | 0.023627  |
| C  | 1.401029  | 1.845631  | 0.020223  |
| C  | 0.609890  | 3.045232  | 0.011554  |
| O  | 1.219750  | 4.207066  | 0.022468  |
| Mg | 0.319008  | 5.850460  | 0.012770  |
| C  | -0.981490 | 7.534403  | -0.002481 |
| C  | -1.709359 | 6.517510  | -0.014856 |
| C  | -1.924285 | 5.154141  | -0.020601 |
| C  | -1.510950 | 3.995879  | -0.016961 |

16

41 (c15) scf done: -1006.894277

|    |           |           |           |
|----|-----------|-----------|-----------|
| C  | -0.505319 | 2.322886  | 0.000822  |
| C  | -1.256406 | 1.173819  | 0.003031  |
| C  | -1.225501 | -0.073982 | 0.003695  |
| C  | -0.998200 | -1.381138 | 0.003863  |
| C  | 0.147967  | -1.917354 | 0.001710  |
| C  | 1.455050  | -2.085726 | -0.000973 |
| C  | 2.108377  | -0.985931 | -0.002852 |
| C  | 2.411133  | 0.277964  | -0.004075 |
| C  | 1.724959  | 1.343332  | -0.003166 |
| C  | 0.909913  | 2.378748  | -0.002088 |
| Mg | 0.804621  | 4.482214  | -0.003208 |
| C  | 0.004091  | 6.342001  | -0.002811 |
| C  | -1.109288 | 6.903583  | -0.000580 |
| O  | -2.374710 | 7.068770  | 0.002576  |
| Mg | -2.059014 | 5.103980  | 0.002669  |
| O  | -1.091655 | 3.559328  | 0.001386  |

16

42 (c10) scf done: -1006.894583

|    |           |           |           |
|----|-----------|-----------|-----------|
| C  | -0.342864 | 2.649645  | 0.000298  |
| C  | -0.989086 | 1.440033  | 0.002074  |
| C  | -1.393248 | 0.268976  | 0.003286  |
| C  | -1.017454 | -0.997249 | 0.003073  |
| C  | -0.212241 | -1.961878 | 0.002016  |
| C  | 1.091000  | -1.670714 | -0.000471 |
| C  | 2.103817  | -0.940038 | -0.002637 |
| C  | 2.121994  | 0.406611  | -0.003224 |
| C  | 1.877014  | 1.612983  | -0.003293 |
| C  | 1.094512  | 2.760872  | -0.002363 |
| O  | 1.631376  | 3.955011  | -0.003923 |
| Mg | 0.515472  | 5.458302  | -0.002571 |
| Mg | -1.614128 | 7.286133  | 0.000519  |
| O  | -2.795003 | 5.675674  | 0.003480  |
| C  | -2.011617 | 4.709051  | 0.002515  |
| C  | -1.113527 | 3.859079  | 0.001220  |

16

43 (t17) scf done: -1006.891292

|   |           |           |           |
|---|-----------|-----------|-----------|
| C | -1.279900 | 1.570956  | -0.286954 |
| C | 3.886562  | -1.559041 | 0.483569  |
| C | -2.362218 | 0.756113  | 0.118841  |
| C | 1.354069  | -1.930626 | 0.459914  |
| O | -4.235437 | -1.758842 | -1.308726 |
| C | -0.251577 | 2.140605  | -0.630859 |
| C | -1.126036 | -1.416205 | 0.127488  |

|    |           |           |           |
|----|-----------|-----------|-----------|
| C  | -3.330581 | -1.286150 | -0.779237 |
| C  | 5.025112  | -1.063566 | 0.393734  |
| C  | -2.314041 | -0.719690 | -0.133413 |
| O  | -4.213963 | 1.641499  | 1.509730  |
| C  | 2.572860  | -1.899774 | 0.530685  |
| Mg | 1.782501  | 2.060439  | -0.661921 |
| C  | -3.342635 | 1.234161  | 0.875643  |
| C  | 0.024093  | -1.752432 | 0.339224  |
| Mg | 4.246849  | 0.744918  | -0.239150 |

16

44 (c2) scf done: -1006.887884

|    |           |           |           |
|----|-----------|-----------|-----------|
| C  | 4.026982  | 1.220214  | -0.013052 |
| C  | -4.033588 | 1.291545  | -0.076492 |
| C  | 3.410349  | 2.434726  | -0.067004 |
| C  | -2.816487 | 1.033940  | -0.056852 |
| C  | 2.660528  | 3.429376  | -0.112946 |
| Mg | -4.202917 | -0.712087 | 0.003871  |
| C  | 3.953550  | -0.001431 | 0.036042  |
| C  | -1.516910 | 0.437191  | -0.022745 |
| C  | 2.241851  | -1.765202 | 0.095026  |
| C  | -0.271565 | -1.587156 | 0.069254  |
| C  | 3.326103  | -1.189835 | 0.079637  |
| C  | 0.908010  | -1.906229 | 0.090877  |
| Mg | 0.982871  | 2.289025  | -0.079236 |
| C  | -1.524281 | -0.957328 | 0.034084  |
| O  | -0.434364 | 1.185146  | -0.045067 |
| O  | -2.640491 | -1.703418 | 0.056085  |

16

45 (t87) scf done: -1006.879066

|    |           |           |           |
|----|-----------|-----------|-----------|
| Mg | 3.134316  | 0.340129  | 0.151932  |
| O  | -6.217637 | -2.197028 | -0.216042 |
| C  | 2.813282  | 2.344159  | 0.059528  |
| O  | 6.593538  | -0.151424 | 0.346188  |
| C  | -0.973526 | 2.313289  | -0.138509 |
| C  | -1.608012 | -2.018553 | -0.007599 |
| C  | -3.383830 | 1.360492  | -0.229289 |
| C  | -5.212200 | -1.712602 | -0.194624 |
| C  | 1.583747  | 2.477902  | -0.009992 |
| C  | -0.381063 | -1.964728 | 0.054951  |
| C  | 0.964643  | -1.750399 | 0.117514  |
| C  | 0.228623  | 2.504236  | -0.082081 |
| C  | 2.148109  | -1.420077 | 0.166897  |
| C  | 5.487938  | -0.010031 | 0.285450  |
| C  | -2.254919 | 1.868699  | -0.189013 |
| Mg | -3.081525 | -0.646291 | -0.136841 |

16

46 t39 scf done: -1006.884964

|    |           |           |           |
|----|-----------|-----------|-----------|
| C  | 1.719052  | -2.037204 | 0.290242  |
| O  | -5.445033 | -0.359998 | -0.554892 |
| C  | 4.148675  | -0.889425 | -0.015824 |
| C  | -4.298770 | -0.270549 | -0.403787 |
| C  | 3.072949  | -1.477896 | 0.144409  |
| C  | -3.043986 | -0.041930 | -0.168521 |
| Mg | 3.356873  | 0.867423  | -0.614824 |
| Mg | -1.895209 | 1.574723  | 0.479611  |

|   |           |           |           |
|---|-----------|-----------|-----------|
| O | 1.463902  | -3.174808 | 0.595065  |
| C | -0.499084 | 3.007427  | 0.800173  |
| C | 0.730417  | -1.005832 | -0.106057 |
| C | -1.846498 | -0.729339 | -0.308372 |
| C | 0.463668  | 2.380674  | 0.331358  |
| C | 1.137502  | 0.264218  | -0.243050 |
| C | -0.671960 | -1.077693 | -0.278470 |
| C | 1.358208  | 1.535507  | -0.374954 |

16

|        |           |              |           |
|--------|-----------|--------------|-----------|
| 47 c34 | scf done: | -1006.883999 |           |
| C      | 2.374085  | -1.400311    | -0.002874 |
| C      | 1.650923  | -2.436650    | -0.003702 |
| C      | 0.400439  | -1.847649    | -0.002623 |
| C      | -0.558532 | -1.067564    | -0.001989 |
| C      | -1.119577 | 0.170270     | -0.000727 |
| C      | -1.303956 | 1.384707     | 0.000360  |
| C      | -0.907560 | 2.742116     | 0.001092  |
| C      | -1.715295 | 3.893752     | 0.001805  |
| C      | -2.034392 | 5.075431     | 0.002465  |
| C      | -1.824238 | 6.439490     | 0.002753  |
| C      | -1.080157 | 7.442609     | 0.002755  |
| Mg     | 0.210256  | 5.762300     | 0.001272  |
| O      | 1.058149  | 4.087406     | 0.000797  |
| C      | 0.500030  | 2.913076     | 0.000583  |
| Mg     | 1.114825  | 0.865366     | -0.000850 |
| O      | 2.833918  | -0.269299    | -0.002050 |

16

|        |           |              |           |
|--------|-----------|--------------|-----------|
| 48 t37 | scf done: | -1006.879760 |           |
| C      | 1.614238  | -2.170769    | -0.889001 |
| C      | -2.756417 | 1.272475     | -0.123952 |
| C      | 0.617480  | -2.556019    | -1.489233 |
| C      | -0.411240 | 1.561685     | 0.879066  |
| C      | 2.630986  | -1.611637    | -0.166884 |
| C      | -1.670972 | 1.471247     | 0.383120  |
| C      | 3.501221  | -1.046876    | 0.508632  |
| C      | 0.755470  | 1.521607     | 1.256278  |
| Mg     | -1.309407 | -2.318555    | -1.996371 |
| O      | -4.996520 | 1.316562     | -0.869983 |
| C      | -3.124847 | -1.458030    | -2.056724 |
| C      | -3.910423 | 0.786406     | -0.844635 |
| O      | 4.940129  | 2.260172     | 3.179106  |
| C      | 4.148187  | 1.755894     | 2.576083  |
| Mg     | 2.560108  | 0.576036     | 1.255322  |
| C      | -3.556424 | -0.439449    | -1.532567 |

16

|       |           |              |           |
|-------|-----------|--------------|-----------|
| 49 c4 | scf done: | -1006.883878 |           |
| C     | 1.343879  | -1.708779    | -0.001579 |
| C     | 0.211573  | -1.224882    | -0.001877 |
| C     | -1.081524 | -0.714894    | -0.002281 |
| Mg    | -2.832658 | -1.853412    | -0.003355 |
| O     | -4.494469 | -1.109262    | -0.002569 |
| Mg    | -4.067394 | 0.637502     | -0.001387 |
| O     | -2.349107 | 1.334051     | -0.002035 |
| C     | -1.216913 | 0.664553     | -0.001797 |
| C     | -0.020759 | 1.469800     | -0.001098 |

|   |          |           |           |
|---|----------|-----------|-----------|
| C | 1.064355 | 2.015835  | -0.000434 |
| C | 2.392106 | 2.327572  | 0.000021  |
| C | 3.553255 | 1.946088  | 0.000580  |
| C | 4.600296 | 1.067922  | 0.000698  |
| C | 4.511201 | -0.163772 | 0.000195  |
| C | 3.874935 | -1.352495 | -0.000340 |
| C | 2.684417 | -1.684173 | -0.001191 |

16

50 t18 scf done: -1006.882119

|    |           |           |          |
|----|-----------|-----------|----------|
| C  | 1.517320  | -1.143875 | 0.032873 |
| O  | -3.225462 | -2.330105 | 0.019114 |
| C  | 2.914599  | -0.875565 | 0.036398 |
| C  | -1.075992 | -1.123273 | 0.027842 |
| Mg | -4.625855 | -0.783575 | 0.023039 |
| C  | -2.115501 | -1.831872 | 0.023208 |
| Mg | -2.277717 | 0.937496  | 0.032697 |
| C  | 2.089976  | 2.719235  | 0.046298 |
| O  | 4.588460  | -2.712060 | 0.033215 |
| C  | 2.910789  | 1.651671  | 0.044798 |
| C  | 0.950169  | 3.161918  | 0.046871 |
| C  | 3.814531  | -1.863392 | 0.034677 |
| C  | 0.304822  | -1.142623 | 0.030584 |
| C  | -1.594566 | 2.863070  | 0.040839 |
| C  | 3.288712  | 0.492512  | 0.041654 |
| C  | -0.400931 | 3.176911  | 0.043591 |

16

51 t73 scf done: -1006.875557

|    |           |           |           |
|----|-----------|-----------|-----------|
| Mg | -2.885221 | 2.268545  | -0.674070 |
| C  | 5.976456  | -1.017574 | -0.261632 |
| C  | -4.663220 | 2.317614  | 0.293791  |
| C  | 4.732393  | -0.753946 | -0.220715 |
| C  | -4.193903 | 1.422304  | 1.020901  |
| O  | 7.119683  | -1.259164 | -0.300638 |
| C  | 0.038054  | 0.847932  | -0.596647 |
| C  | 3.473254  | -0.493561 | -0.174066 |
| C  | -3.461901 | 0.451224  | 1.659126  |
| C  | -1.457556 | -2.028674 | -0.805233 |
| C  | 0.945155  | -0.040609 | -0.029264 |
| C  | 2.239494  | -0.209815 | -0.156161 |
| C  | -1.056856 | 1.393832  | -0.817212 |
| Mg | -0.935040 | -0.546806 | 0.908357  |
| C  | -2.615828 | -0.357679 | 2.046268  |
| O  | -1.621848 | -2.694413 | -1.688717 |

16

52 t90 scf done: -1006.880455

|    |           |           |           |
|----|-----------|-----------|-----------|
| C  | 3.178652  | -1.500334 | 0.025834  |
| O  | -3.703022 | -2.629952 | 0.000808  |
| Mg | 0.989407  | 3.534763  | -0.025841 |
| C  | -2.660703 | -2.144569 | -0.002983 |
| C  | 3.732740  | -0.262634 | 0.011323  |
| O  | -2.431102 | 0.605931  | -0.031596 |
| C  | 3.164765  | 0.833085  | -0.006541 |
| Mg | -1.576718 | 2.371145  | -0.033382 |
| C  | 0.990727  | 1.055068  | -0.035277 |
| C  | 2.310066  | -2.370910 | 0.030061  |



|    |           |           |              |
|----|-----------|-----------|--------------|
| C  | 2.128981  | 1.756917  | -0.027359    |
| C  | 0.958029  | -2.499927 | 0.021285     |
| C  | -0.254464 | -2.364607 | 0.011373     |
| C  | -0.121154 | 0.460983  | -0.036434    |
| C  | -1.444246 | -1.594316 | -0.006494    |
| C  | -1.350134 | -0.124941 | -0.026410    |
| 16 |           |           |              |
| 53 | t43       | scf done: | -1006.877254 |
| C  | -3.040278 | -1.504452 | 0.768035     |
| C  | 2.027713  | 2.639251  | 0.285738     |
| C  | -2.034566 | -1.942092 | 0.036010     |
| C  | 2.415832  | 1.492578  | 0.557299     |
| C  | -3.195210 | -0.251398 | 0.864222     |
| C  | 2.735002  | 0.173361  | 0.743488     |
| C  | -0.982701 | -2.076691 | -0.669350    |
| Mg | 0.405684  | 2.038662  | -0.768548    |
| Mg | 1.240981  | -1.636113 | -0.324966    |
| C  | -3.158841 | 1.062643  | 0.829579     |
| C  | 2.961591  | -1.033766 | 0.758243     |
| C  | -0.503075 | -0.915869 | -1.298909    |
| O  | 2.865332  | -2.283952 | 0.581234     |
| C  | -2.321206 | 1.848285  | 0.317606     |
| C  | 0.173260  | 0.091296  | -1.572443    |
| O  | -1.505653 | 2.561721  | -0.191846    |
| 16 |           |           |              |
| 54 | t59       | scf done: | -1006.876231 |
| C  | -2.831444 | 0.887254  | 0.188281     |
| C  | 3.038274  | -0.102155 | -1.595093    |
| C  | -1.762654 | 1.487470  | 0.071080     |
| C  | 2.278797  | -0.888027 | -0.865175    |
| Mg | -1.929872 | -1.136094 | -0.110691    |
| C  | 1.058847  | -1.529527 | -0.689012    |
| C  | -0.552502 | 2.088763  | -0.067631    |
| C  | -0.090803 | -1.880538 | -0.461849    |
| C  | 0.596462  | 2.503157  | -0.211118    |
| C  | 3.261760  | -0.232946 | 0.071840     |
| C  | -3.739091 | -0.153044 | 0.244760     |
| O  | -6.123683 | -0.610444 | 0.569638     |
| O  | 5.047371  | -0.916963 | 1.612926     |
| C  | -5.007002 | -0.330737 | 0.422254     |
| C  | 4.233332  | -0.671465 | 0.829313     |
| Mg | 2.377359  | 1.618239  | -0.515527    |
| 16 |           |           |              |
| 55 | t16       | scf done: | -1006.876763 |
| C  | 2.537247  | 2.380381  | -0.029623    |
| C  | -1.117721 | -1.252896 | 0.022003     |
| C  | -3.193479 | 0.111572  | 0.022578     |
| C  | 4.229371  | 0.513494  | -0.021986    |
| C  | 3.942851  | -2.074344 | 0.002242     |
| C  | 1.307924  | 2.373859  | -0.022475    |
| C  | 3.612563  | 1.572497  | -0.027833    |
| C  | 4.187861  | -0.850520 | -0.009303    |
| Mg | 1.949330  | -1.701023 | 0.009294     |
| Mg | -3.078904 | -1.921041 | 0.039515     |
| C  | -0.875285 | 1.120154  | -0.000005    |

|   |           |           |           |
|---|-----------|-----------|-----------|
| C | 0.045060  | 1.927153  | -0.012812 |
| C | -4.006156 | 1.111472  | 0.018194  |
| O | 0.149278  | -1.491855 | 0.016473  |
| O | -4.813766 | 1.957744  | 0.015348  |
| C | -1.723974 | 0.012926  | 0.014570  |

16

56 t58 scf done: -1006.872803

|    |           |           |           |
|----|-----------|-----------|-----------|
| C  | -0.159931 | -0.647291 | -0.045939 |
| C  | 1.033751  | 0.090153  | -0.022420 |
| O  | 1.548115  | 2.466628  | 0.031671  |
| C  | 2.278996  | -0.346422 | -0.023804 |
| C  | -3.565628 | 1.533849  | 0.020413  |
| C  | -5.408380 | -1.682206 | -0.050918 |
| C  | 6.087740  | -0.634281 | -0.003880 |
| C  | 0.656621  | 1.679696  | 0.012968  |
| C  | -1.348911 | -0.974508 | -0.061488 |
| O  | 7.249525  | -0.697406 | 0.002286  |
| C  | -4.502902 | 0.733782  | 0.006166  |
| C  | 3.544294  | -0.424441 | -0.016664 |
| Mg | -1.510640 | 1.525569  | 0.007449  |
| C  | -5.203226 | -0.450715 | -0.019937 |
| C  | 4.811402  | -0.616261 | -0.011703 |
| Mg | -3.327403 | -1.538414 | -0.063326 |

16

57 t40 scf done: -1006.871180

|    |           |           |           |
|----|-----------|-----------|-----------|
| C  | 2.851311  | -2.103011 | 0.093996  |
| C  | -1.124500 | -2.313828 | -0.054838 |
| C  | -0.107523 | 2.198438  | 0.044003  |
| Mg | -4.206707 | -0.060132 | -0.139475 |
| C  | 1.435969  | -1.928847 | 0.044735  |
| O  | 3.400555  | 2.555105  | 0.159150  |
| C  | 0.087744  | -2.211651 | -0.008915 |
| C  | -1.332114 | 2.234291  | -0.003520 |
| C  | 2.255780  | -0.814320 | 0.086731  |
| C  | -3.913789 | 1.918757  | -0.107188 |
| C  | -2.475302 | -2.194723 | -0.103934 |
| O  | 3.808794  | -2.825731 | 0.120144  |
| C  | -3.695987 | -2.007010 | -0.146004 |
| C  | 4.287526  | 3.253931  | 0.193396  |
| C  | -2.691430 | 2.101423  | -0.057648 |
| Mg | 1.614711  | 1.149368  | 0.090536  |

16

58 t36 scf done: -1006.869810

|    |           |           |           |
|----|-----------|-----------|-----------|
| C  | -3.417188 | -0.330233 | 0.027352  |
| C  | -3.001434 | 0.973543  | 0.010981  |
| C  | -4.407524 | 0.700378  | 0.024785  |
| C  | 6.244155  | 1.062715  | -0.084481 |
| C  | -2.181444 | -2.628604 | 0.038707  |
| C  | -1.800141 | 1.649645  | -0.005121 |
| C  | -0.647325 | 2.038738  | -0.018251 |
| O  | 5.129165  | 0.887232  | -0.066570 |
| C  | 0.692919  | 2.244465  | -0.030605 |
| Mg | -0.185721 | -2.947742 | 0.023681  |
| C  | 1.749177  | -2.449818 | 0.003164  |
| Mg | 2.874714  | 0.509368  | -0.032284 |

|    |           |           |              |
|----|-----------|-----------|--------------|
| C  | 2.499212  | -1.470977 | -0.009177    |
| O  | -5.544666 | 1.065728  | 0.030027     |
| C  | 1.926158  | 2.303192  | -0.040636    |
| C  | -2.827888 | -1.585392 | 0.035193     |
| 16 |           |           |              |
| 59 | c22       | scf done: | -1006.877153 |
| Mg | 0.000000  | -4.313119 | 4.664593     |
| Mg | 0.000000  | -2.260168 | 2.357335     |
| O  | -3.197008 | 1.935953  | -2.354744    |
| O  | 3.197008  | 1.935953  | -2.354744    |
| C  | -2.139462 | 1.576988  | -1.951604    |
| C  | 2.139462  | 1.576988  | -1.951604    |
| C  | -0.702426 | 1.596057  | -1.972988    |
| C  | 0.702426  | 1.596057  | -1.972988    |
| C  | -1.842708 | -1.653977 | 1.676688     |
| C  | 1.842708  | -1.653977 | 1.676688     |
| C  | -1.382926 | -0.889821 | 0.818533     |
| C  | 1.382926  | -0.889821 | 0.818533     |
| C  | -0.710989 | -0.063870 | -0.108979    |
| C  | 0.710989  | -0.063870 | -0.108979    |
| C  | 1.327909  | 0.783195  | -1.060166    |
| C  | -1.327909 | 0.783195  | -1.060166    |
| 16 |           |           |              |
| 60 | t100      | scf done: | -1006.868346 |
| O  | -1.677667 | 3.298833  | 3.726675     |
| C  | -0.567082 | -3.525218 | -1.112255    |
| C  | -2.086472 | -0.209244 | 2.222589     |
| C  | 1.975219  | 2.095684  | -0.604505    |
| C  | -1.197033 | 2.700560  | 2.916582     |
| C  | -1.217145 | -0.342764 | 1.277536     |
| C  | 0.368923  | -3.126375 | -1.837372    |
| C  | 1.374559  | -2.651757 | -2.591301    |
| C  | 2.650810  | 1.510389  | -1.604325    |
| C  | 2.890969  | -0.623119 | -3.011097    |
| C  | 1.303497  | 2.569736  | 0.331173     |
| Mg | -1.045918 | -2.029233 | 0.187278     |
| C  | 2.793244  | 0.484276  | -2.307959    |
| O  | -2.862822 | -0.041062 | 3.093121     |
| C  | 2.128351  | -1.677676 | -2.818810    |
| Mg | -0.163380 | 1.412439  | 1.175951     |
| 16 |           |           |              |
| 61 | t47       | scf done: | -1006.872586 |
| O  | -6.034771 | -1.105587 | -0.216756    |
| O  | 3.501714  | -2.627679 | 0.728171     |
| C  | -4.955223 | -0.686927 | -0.139757    |
| C  | 1.792872  | 2.808541  | 0.170683     |
| Mg | -1.671306 | -0.925282 | -0.118036    |
| C  | 2.620323  | 1.915884  | -0.003874    |
| C  | -3.714168 | -0.340250 | -0.070871    |
| C  | 3.465162  | 0.856954  | -0.268082    |
| C  | 0.276499  | -1.504701 | -0.107218    |
| C  | 3.592938  | -0.475998 | -0.219524    |
| C  | -2.945855 | 0.792282  | 0.102310     |
| C  | 2.908684  | -1.716239 | 0.205171     |
| C  | -1.919970 | 1.484652  | 0.216885     |

|    |           |           |           |
|----|-----------|-----------|-----------|
| C  | 4.643544  | 0.247876  | -0.803392 |
| C  | 1.480843  | -1.661226 | 0.010191  |
| Mg | -0.184931 | 2.490054  | 0.317781  |

16

62 t51 scf done: -1006.867229

|    |           |           |           |
|----|-----------|-----------|-----------|
| O  | 6.237969  | 0.599831  | 0.329873  |
| C  | -6.327592 | -1.150401 | -0.403081 |
| C  | 5.220803  | 0.066262  | 0.222864  |
| O  | -5.258817 | -0.798067 | -0.314640 |
| C  | 3.965915  | -0.319862 | 0.124149  |
| C  | -1.851520 | -1.527561 | -0.261302 |
| C  | 3.306733  | -1.517558 | -0.049488 |
| Mg | -3.148812 | 0.039836  | -0.121948 |
| Mg | 2.086461  | 0.635030  | 0.164796  |
| C  | -3.269386 | 2.044150  | 0.120515  |
| C  | 1.962615  | -1.616258 | -0.116568 |
| C  | -0.621719 | -1.652995 | -0.226662 |
| C  | 0.540887  | 1.937941  | 0.262438  |
| C  | -2.033522 | 2.160204  | 0.185011  |
| C  | 0.718497  | -1.682810 | -0.175594 |
| C  | -0.665138 | 2.156576  | 0.240256  |

16

63 t88 scf done: -1006.868556

|    |           |           |           |
|----|-----------|-----------|-----------|
| C  | -0.875431 | -1.991203 | -2.585457 |
| C  | 4.786568  | 0.155559  | -0.007996 |
| C  | 1.095669  | 0.325480  | 0.381593  |
| O  | 5.957225  | 0.224120  | 0.029690  |
| C  | 0.230060  | -2.307650 | -3.050751 |
| Mg | -2.015231 | 0.837162  | 1.193821  |
| Mg | 1.476904  | -1.318940 | -1.802625 |
| C  | -2.253005 | 2.258232  | 3.077102  |
| C  | 3.510218  | 0.189828  | 0.094509  |
| O  | -2.409399 | 2.923121  | 3.959453  |
| C  | -3.508240 | -0.349453 | -0.305340 |
| C  | -3.929630 | 0.348743  | 0.633800  |
| C  | -2.860824 | -1.058144 | -1.268264 |
| C  | 2.262624  | -0.120721 | -0.258585 |
| C  | -2.016500 | -1.570606 | -1.980953 |
| C  | -0.035484 | 0.595385  | 0.787763  |

16

64 c3 scf done: -1006.874625

|    |           |           |           |
|----|-----------|-----------|-----------|
| Mg | -4.266476 | 2.188660  | -0.112920 |
| Mg | -3.893752 | -0.488147 | -0.004336 |
| O  | -2.338195 | -1.563635 | 0.051086  |
| C  | -1.288067 | -0.768053 | 0.027058  |
| C  | 0.031652  | -1.318410 | 0.059708  |
| C  | 1.195198  | -1.673369 | 0.083474  |
| C  | 2.550264  | -1.659159 | 0.093030  |
| C  | 3.663279  | -1.150342 | 0.081518  |
| C  | 4.372411  | 0.003674  | 0.040446  |
| C  | 4.243998  | 1.222951  | -0.010077 |
| C  | 3.265843  | 2.160030  | -0.055399 |
| C  | 2.066129  | 2.407454  | -0.075454 |
| C  | 0.754443  | 2.078522  | -0.072388 |
| C  | -0.292918 | 1.450599  | -0.055308 |

|    |           |           |              |
|----|-----------|-----------|--------------|
| C  | -1.413160 | 0.601316  | -0.029559    |
| O  | -2.685038 | 1.105525  | -0.060245    |
| 16 |           |           |              |
| 65 | t66       | scf done: | -1006.873992 |
| C  | -3.669112 | 2.425533  | 0.015294     |
| O  | 2.130415  | -3.110999 | -0.000113    |
| C  | -2.489431 | 2.026738  | 0.011754     |
| C  | 2.497585  | -1.885908 | 0.001681     |
| Mg | -4.181182 | 0.483851  | 0.010451     |
| Mg | 0.357241  | -2.362172 | -0.000350    |
| O  | 4.646572  | 2.114552  | 0.001621     |
| C  | 2.617164  | -0.673812 | 0.003174     |
| C  | -2.781658 | -1.036359 | -0.000361    |
| C  | 1.266015  | 1.325388  | 0.005726     |
| C  | 3.679458  | 1.484848  | 0.002609     |
| C  | -1.325815 | 1.188624  | 0.005833     |
| C  | -1.513873 | -1.534222 | -0.003885    |
| C  | -1.676638 | -0.125515 | 0.001072     |
| C  | 2.567978  | 0.754857  | 0.004100     |
| C  | 0.062604  | 1.459851  | 0.006708     |
| 16 |           |           |              |
| 66 | t33       | scf done: | -1006.870165 |
| C  | -4.125621 | 0.924518  | -0.043200    |
| O  | 5.500950  | 1.499251  | 0.008851     |
| C  | -4.313282 | 2.152856  | -0.061344    |
| C  | 4.432580  | 1.013513  | 0.010088     |
| C  | -3.744765 | -0.380184 | -0.022838    |
| C  | 3.259380  | 0.484879  | 0.012302     |
| C  | -3.138166 | -1.436180 | -0.004168    |
| C  | 1.742115  | 0.595491  | 0.001776     |
| Mg | -2.321443 | 2.566205  | -0.051966    |
| C  | 0.642393  | 1.420318  | -0.016850    |
| C  | -2.238336 | -2.448230 | 0.015865     |
| C  | 2.317486  | -0.593394 | 0.021843     |
| C  | -1.327793 | -3.278806 | 0.033618     |
| C  | -0.377833 | 2.104326  | -0.033324    |
| Mg | 0.589183  | -2.759287 | 0.039139     |
| O  | 2.217504  | -1.875056 | 0.038461     |
| 16 |           |           |              |
| 67 | t30       | scf done: | -1006.867689 |
| C  | 3.762616  | -0.902014 | 0.215534     |
| O  | -6.135466 | -0.734712 | -0.089611    |
| C  | 3.950994  | 0.423678  | -0.355155    |
| C  | -4.988691 | -0.847429 | -0.083406    |
| C  | 4.055157  | 1.582683  | -0.765569    |
| C  | -3.686647 | -0.785523 | 0.065571     |
| Mg | 2.242364  | 2.336384  | -0.328954    |
| C  | -2.583071 | -1.492135 | -0.270780    |
| C  | 2.466700  | -1.401944 | -0.083379    |
| Mg | -2.189742 | 0.637856  | 0.508654     |
| C  | 1.241373  | -1.575622 | -0.178066    |
| C  | -1.299442 | -1.580649 | -0.247459    |
| C  | -0.038816 | -1.782053 | -0.342612    |
| C  | -0.804830 | 2.069898  | 0.489608     |
| C  | 0.312163  | 2.500131  | 0.204085     |

|    |           |           |              |
|----|-----------|-----------|--------------|
| O  | 4.571349  | -1.471792 | 0.922790     |
| 16 |           |           |              |
| 68 | t55       | scf done: | -1006.869833 |
| C  | 3.964045  | -0.328593 | -0.007000    |
| C  | -3.548533 | 1.742410  | 0.071204     |
| C  | 1.884670  | 2.868531  | 0.086591     |
| C  | -2.857420 | -1.598190 | -0.022563    |
| Mg | -0.075447 | 2.315810  | 0.075651     |
| C  | 0.110905  | -1.975912 | -0.043386    |
| C  | 2.699587  | 1.944677  | 0.059100     |
| C  | 0.900700  | -2.924822 | -0.071123    |
| C  | -2.562098 | 0.756134  | 0.040650     |
| C  | 3.414167  | 0.778406  | 0.025051     |
| O  | 0.168346  | 0.283612  | 0.016855     |
| O  | -3.652373 | -2.411971 | -0.041693    |
| Mg | 2.632242  | -1.803701 | -0.044909    |
| C  | -1.998397 | -0.560748 | 0.002441     |
| C  | -2.155287 | 2.058124  | 0.075258     |
| C  | -0.569541 | -0.719710 | -0.007310    |
| 16 |           |           |              |
| 69 | c35       | scf done: | -1006.871664 |
| C  | 2.252239  | -1.800197 | -0.032517    |
| C  | 1.458454  | -2.787124 | -0.014797    |
| C  | 0.255320  | -2.108388 | 0.006233     |
| C  | -0.656731 | -1.273352 | 0.020549     |
| C  | -1.208895 | -0.033577 | 0.027926     |
| C  | -1.299633 | 1.189880  | 0.026339     |
| C  | -0.727720 | 2.506060  | 0.012203     |
| C  | -1.458300 | 3.747175  | 0.022407     |
| C  | -1.439953 | 4.976554  | 0.018745     |
| C  | -0.780270 | 6.192653  | 0.002905     |
| C  | -1.006950 | 7.464211  | 0.004375     |
| O  | -1.085056 | 8.624470  | 0.003190     |
| Mg | 0.734609  | 4.664575  | -0.021319    |
| C  | 0.655209  | 2.567384  | -0.013877    |
| Mg | 1.114531  | 0.535903  | -0.017489    |
| O  | 2.792064  | -0.711179 | -0.045807    |
| 16 |           |           |              |
| 70 | t42       | scf done: | -1006.868957 |
| C  | -2.014921 | -2.235368 | -0.016449    |
| O  | 5.592370  | 1.502872  | 0.012799     |
| C  | -0.960394 | -3.091924 | -0.015396    |
| C  | -0.287237 | 2.030996  | 0.001825     |
| C  | -2.799039 | -1.302345 | -0.015898    |
| C  | 4.517745  | 1.026171  | 0.009843     |
| C  | 0.046654  | -3.816811 | -0.014104    |
| C  | 0.759588  | 1.395084  | 0.002753     |
| C  | -3.487082 | -0.139137 | -0.014515    |
| C  | 3.344696  | 0.510879  | -0.002550    |
| C  | -4.061453 | 0.950410  | -0.013053    |
| Mg | -2.277527 | 2.115768  | -0.004610    |
| C  | 2.392504  | -0.624645 | 0.004390     |
| C  | 1.889860  | 0.601330  | 0.003446     |
| O  | -4.267950 | 2.190459  | -0.010035    |
| Mg | 1.537636  | -2.481495 | -0.003969    |

16  
71 t54 scf done: -1006.865711  
Mg -3.956350 1.091799 -0.001088  
O 3.075340 2.000210 -0.016414  
C 2.446751 0.995383 -0.010866  
C 2.371128 -1.572565 0.000788  
C -2.745773 -1.854817 0.009414  
C -1.532980 1.678446 -0.006767  
C -2.507652 2.452093 -0.007668  
C -1.507051 -1.895788 0.007748  
C -0.197374 -1.783055 0.005596  
C 1.064317 -1.655343 0.003115  
C 4.515270 -0.411638 -0.007847  
C 3.169577 -0.470159 -0.005381  
C -3.973378 -1.308702 0.009205  
C -5.051943 -0.671766 0.008633  
Mg 0.238403 0.636740 -0.005414  
O 5.596648 -0.044288 -0.011551

16  
72 t68 scf done: -1006.870286  
C 3.249206 -0.056874 0.426328  
O 2.503000 3.129531 -0.574373  
C -4.969108 -0.034063 0.114166  
C 0.830619 -1.355947 -0.224894  
C -3.983474 -0.795775 0.013731  
C 2.355881 2.017767 -0.329891  
C -0.367575 0.708119 0.108738  
C 3.131962 -1.543865 0.204306  
C 2.157401 0.751972 0.045393  
Mg -3.544874 1.382218 0.255161  
Mg -1.957466 -1.147204 -0.071614  
C 2.110864 -1.961316 -0.440418  
C -1.501119 1.200778 0.190230  
C 4.151313 -0.869455 0.953164  
C 0.860386 0.048423 0.001745  
O -0.281083 -2.001325 -0.280358

16  
73 t19 scf done: -1006.868071  
C 3.939654 1.136241 -0.048993  
C -3.956376 -1.090913 -0.074908  
C 3.498769 0.009916 0.263383  
C -3.496789 0.038527 0.180207  
C 2.712967 -1.059889 0.481249  
Mg -2.044525 -1.681080 -0.492611  
C 1.763467 -1.843399 0.551272  
C -2.781741 1.181133 0.374287  
Mg 1.919126 1.735245 -0.404091  
C -1.873906 1.995937 0.419031  
C 0.466442 3.034428 0.180851  
C -0.072067 -0.734330 -0.781678  
C 0.438106 -1.925394 0.156291  
C -0.696126 2.659124 0.346475  
O -0.473576 -2.734666 0.384523  
O 0.678985 0.184260 -1.028128

16

74 t44 scf done: -1006.867786

|    |           |           |           |
|----|-----------|-----------|-----------|
| Mg | 1.324741  | 1.610214  | -0.604394 |
| O  | -2.758810 | -0.869302 | -1.421698 |
| C  | 3.741253  | -0.120895 | 0.295220  |
| C  | -1.628151 | -1.181061 | -1.547257 |
| O  | 4.868314  | -0.112057 | 0.571263  |
| C  | -1.808334 | -0.573280 | 2.127320  |
| C  | 2.503187  | -0.024295 | -0.078142 |
| C  | -0.506065 | -0.901754 | 1.909017  |
| C  | -0.307268 | 2.641752  | -1.070009 |
| C  | -2.998655 | -0.219516 | 2.047794  |
| C  | -1.212002 | 1.928003  | -0.604164 |
| C  | 0.586214  | -1.409787 | -0.800425 |
| C  | 1.381449  | -0.933947 | 0.154092  |
| C  | -0.422409 | -1.603796 | -1.585129 |
| C  | 0.561796  | -0.988452 | 1.320835  |
| Mg | -2.649471 | 0.714905  | 0.229812  |

16

75 t71 scf done: -1006.867971

|    |           |           |           |
|----|-----------|-----------|-----------|
| C  | 1.542363  | -2.953146 | 0.403626  |
| Mg | 2.126448  | 1.559413  | -0.208563 |
| C  | -0.131869 | 2.085433  | -0.176672 |
| C  | -1.403899 | -0.037043 | 0.498236  |
| O  | -6.235694 | 0.229913  | -0.745780 |
| C  | -5.119791 | 0.171734  | -0.458647 |
| C  | 3.350374  | -1.243258 | -0.437796 |
| C  | -0.320451 | 0.832915  | 0.455692  |
| Mg | 0.169996  | -1.541407 | 0.872794  |
| C  | 0.552124  | 2.957742  | -0.741985 |
| C  | -3.882083 | 0.102507  | -0.134845 |
| O  | 0.819130  | 0.375196  | 0.937597  |
| C  | -2.651197 | 0.090341  | 0.151997  |
| C  | 2.414369  | -2.171976 | -0.016320 |
| C  | 3.540030  | 0.100862  | -0.608352 |
| C  | 4.598321  | -0.786120 | -0.916445 |

16

76 t56 scf done: -1006.868379

|    |           |           |           |
|----|-----------|-----------|-----------|
| C  | 2.281038  | 0.053057  | -0.226751 |
| C  | 2.127111  | 1.430256  | -0.310258 |
| O  | -0.277785 | -2.367428 | 1.048331  |
| C  | 1.902367  | 2.641223  | -0.338431 |
| C  | -2.485647 | -0.416906 | -0.782883 |
| O  | 3.801072  | -1.983820 | -0.467408 |
| Mg | 0.009841  | 3.247499  | 0.037815  |
| Mg | -1.886909 | -2.478962 | 0.046477  |
| C  | 0.160793  | -1.203185 | 0.596935  |
| C  | -1.989997 | 3.113915  | 0.322421  |
| C  | 2.870759  | -1.265637 | -0.261211 |
| C  | -1.680080 | 0.493776  | -0.003942 |
| C  | -3.073479 | -1.424767 | -1.210908 |
| C  | -1.943427 | 1.881661  | 0.212613  |
| C  | -0.596531 | -0.088250 | 0.518387  |
| C  | 1.527038  | -1.018562 | 0.135182  |

16

77 t86 scf done: -1006.861050



|    |           |           |           |
|----|-----------|-----------|-----------|
| C  | 0.830759  | 0.351643  | 1.525932  |
| C  | -2.670644 | 2.293243  | -0.708626 |
| C  | 0.915152  | -0.730355 | 0.741649  |
| C  | -2.444326 | 1.212390  | -1.245681 |
| C  | 0.524786  | 1.415490  | 2.084047  |
| Mg | -1.970489 | 3.336348  | 0.855545  |
| C  | 1.413367  | -1.976073 | 0.652383  |
| C  | -2.064432 | -0.006132 | -1.738187 |
| O  | 1.674827  | -1.324705 | -2.599218 |
| C  | -1.651627 | -1.111992 | -2.108042 |
| C  | 2.420357  | -1.204937 | -3.437562 |
| C  | -0.766659 | 3.636469  | 2.469139  |
| C  | -0.113621 | 2.582857  | 2.297986  |
| Mg | 0.012536  | -1.451110 | -1.019179 |
| C  | 2.122438  | -2.987423 | 1.056957  |
| O  | 2.688808  | -3.987775 | 1.224814  |

16

|    |           |           |              |  |
|----|-----------|-----------|--------------|--|
| 78 | t84       | scf done: | -1006.863716 |  |
| O  | -6.172173 | -1.055962 | -0.147085    |  |
| C  | 3.930311  | -1.209124 | 0.849177     |  |
| C  | -2.534760 | -0.999821 | -0.069931    |  |
| C  | 4.629080  | -0.237906 | -0.118506    |  |
| C  | -5.034779 | -0.826035 | -0.108507    |  |
| O  | 5.716052  | 0.040367  | -0.483210    |  |
| C  | -1.295399 | -1.067723 | -0.049660    |  |
| C  | 2.324009  | 1.083115  | -0.064370    |  |
| Mg | 0.709366  | -1.252809 | 0.018870     |  |
| C  | 1.292138  | 1.731238  | 0.037161     |  |
| C  | -3.802415 | -0.447050 | -0.057966    |  |
| C  | 3.208287  | 0.021273  | -0.315953    |  |
| C  | 0.063926  | 2.302020  | 0.132763     |  |
| Mg | -2.450025 | 1.164988  | 0.082335     |  |
| C  | -1.111238 | 2.669456  | 0.210242     |  |
| C  | 2.783949  | -1.333402 | 0.126954     |  |

16

|    |           |           |              |  |
|----|-----------|-----------|--------------|--|
| 79 | t61       | scf done: | -1006.868108 |  |
| Mg | 3.109270  | -0.617742 | -0.075042    |  |
| O  | -4.616060 | -0.394650 | -0.015662    |  |
| C  | 2.340442  | 1.267624  | 0.211546     |  |
| C  | -3.470673 | -0.509815 | -0.022946    |  |
| Mg | 0.978855  | 2.724321  | -0.318096    |  |
| C  | -2.148979 | -0.611418 | -0.031961    |  |
| O  | 2.163670  | -2.290293 | -0.468248    |  |
| C  | -1.414220 | -1.754726 | -0.438430    |  |
| C  | 1.376129  | 0.484757  | 0.741187     |  |
| C  | -1.212877 | 0.482869  | 0.383981     |  |
| C  | 1.013060  | -1.961456 | 0.007493     |  |
| C  | -0.284668 | -2.230863 | -0.504506    |  |
| C  | 0.921675  | -0.935744 | 0.978627     |  |
| C  | -1.042013 | 2.990676  | -0.472455    |  |
| C  | -0.018574 | 0.122528  | 0.919406     |  |
| C  | -1.234671 | 1.820892  | -0.102414    |  |

16

|    |           |           |              |  |
|----|-----------|-----------|--------------|--|
| 80 | t27       | scf done: | -1006.861551 |  |
| C  | -2.814155 | 2.383251  | 0.000283     |  |

|    |           |           |           |
|----|-----------|-----------|-----------|
| C  | 4.942219  | -0.793686 | 0.000064  |
| C  | -1.498208 | 1.811022  | 0.000389  |
| C  | 3.875545  | -1.454884 | 0.000177  |
| C  | -2.580488 | 1.006492  | 0.000275  |
| C  | 0.140416  | -2.246162 | 0.000160  |
| O  | -5.518602 | -0.738353 | 0.000088  |
| Mg | 3.816332  | 0.932774  | 0.000209  |
| C  | -4.396394 | -0.566323 | -0.000021 |
| C  | 2.687339  | -2.083105 | 0.000266  |
| C  | -3.045933 | -0.354461 | 0.000119  |
| C  | 1.444874  | -2.169705 | 0.000274  |
| Mg | 0.567223  | 1.983707  | 0.000440  |
| C  | -1.058267 | -1.825972 | 0.000042  |
| C  | -2.313938 | -1.531427 | 0.000000  |
| O  | 2.357253  | 1.971375  | 0.000364  |

16

|    |           |           |              |  |
|----|-----------|-----------|--------------|--|
| 81 | t96       | scf done: | -1006.859372 |  |
| C  | 2.944950  | -2.287447 | -1.438636    |  |
| C  | -0.032739 | 3.020721  | 0.577840     |  |
| C  | 3.417781  | -1.076397 | 1.250255     |  |
| C  | 1.173264  | 3.260727  | 0.980182     |  |
| O  | 3.765146  | -2.598623 | -2.133232    |  |
| C  | -1.210158 | 2.720840  | 0.207837     |  |
| Mg | 1.552354  | -1.397465 | 0.358302     |  |
| C  | 2.140076  | 2.380716  | 1.179544     |  |
| C  | 3.264288  | 0.166094  | 1.307539     |  |
| C  | -2.032244 | 1.749303  | -0.128216    |  |
| C  | -3.267800 | -0.414947 | -0.694920    |  |
| C  | 2.988941  | 1.485785  | 1.361178     |  |
| C  | -4.330701 | -1.074933 | -1.046986    |  |
| C  | -2.843260 | 0.843547  | -0.443810    |  |
| O  | -5.176085 | -1.805451 | -1.348890    |  |
| Mg | -1.193570 | -0.791868 | -0.171301    |  |

16

|    |           |           |              |  |
|----|-----------|-----------|--------------|--|
| 82 | t97       | scf done: | -1006.856419 |  |
| Mg | -1.287047 | 0.641348  | 0.632965     |  |
| C  | -2.476416 | -1.136201 | 0.699571     |  |
| O  | -1.960270 | 1.303958  | -1.473635    |  |
| O  | -4.692238 | -1.988936 | 1.291714     |  |
| C  | -2.283380 | 1.622992  | -2.505943    |  |
| C  | 3.073123  | 1.593785  | 0.265157     |  |
| C  | -0.067304 | -1.426794 | -0.180190    |  |
| C  | -0.377826 | 2.386177  | 1.213201     |  |
| C  | 3.870794  | -1.611491 | -1.089967    |  |
| C  | -1.245755 | -1.503733 | 0.209970     |  |
| Mg | 1.859160  | -1.728544 | -0.691673    |  |
| C  | 2.163235  | 2.349606  | 0.726298     |  |
| C  | 3.939281  | -0.426603 | -0.664909    |  |
| C  | 4.013228  | 0.841435  | -0.207326    |  |
| C  | 0.853095  | 2.381211  | 0.989076     |  |
| C  | -3.623777 | -1.639663 | 0.994642     |  |

16

|    |           |           |              |  |
|----|-----------|-----------|--------------|--|
| 83 | t81       | scf done: | -1006.860241 |  |
| C  | -0.082406 | -1.734411 | -0.505745    |  |
| C  | 4.208228  | -0.848916 | 0.219801     |  |

|    |           |           |           |
|----|-----------|-----------|-----------|
| C  | -2.993477 | 0.654505  | 0.317298  |
| C  | 0.733986  | -2.641008 | -0.365307 |
| Mg | -0.042339 | 2.439710  | -0.135515 |
| O  | -0.252480 | 0.522971  | -0.814336 |
| C  | 2.824202  | 1.364611  | 0.247172  |
| C  | -2.983390 | -1.544224 | 0.265791  |
| C  | -2.001566 | 3.071040  | 0.293920  |
| C  | 3.578485  | 0.222192  | 0.241676  |
| Mg | 2.686911  | -2.083173 | -0.121614 |
| C  | 1.972992  | 2.247825  | 0.196514  |
| C  | -2.206863 | -0.455168 | -0.012164 |
| C  | -0.831958 | -0.518991 | -0.489082 |
| C  | -2.474784 | 1.900640  | 0.269315  |
| O  | -3.661824 | -2.423030 | 0.503472  |

16

|    |           |           |              |  |
|----|-----------|-----------|--------------|--|
| 84 | t31       | scf done: | -1006.861854 |  |
| O  | 8.058430  | 0.755906  | 0.002835     |  |
| Mg | -4.223377 | 1.912966  | 0.005402     |  |
| C  | 6.905884  | 0.544602  | 0.002375     |  |
| C  | -2.287318 | 2.294613  | 0.005697     |  |
| C  | 5.658567  | 0.315461  | 0.001864     |  |
| O  | -5.263121 | 0.238470  | 0.002825     |  |
| C  | 4.389922  | 0.082797  | 0.001502     |  |
| C  | -2.007158 | 1.080605  | 0.003555     |  |
| C  | 3.151497  | -0.146304 | 0.001165     |  |
| C  | -4.252380 | -0.487328 | 0.001397     |  |
| C  | 1.876517  | -0.388519 | 0.000801     |  |
| C  | -3.128819 | -1.038820 | 0.000115     |  |
| Mg | -1.785576 | -2.799987 | -0.003120    |  |
| C  | -1.825823 | -0.335714 | 0.001162     |  |
| C  | 0.641853  | -0.609324 | 0.000494     |  |
| C  | -0.622162 | -1.008511 | -0.000110    |  |

16

|    |           |           |              |  |
|----|-----------|-----------|--------------|--|
| 85 | t26       | scf done: | -1006.861350 |  |
| C  | 4.408410  | -2.433616 | -0.003954    |  |
| O  | -5.530490 | -1.972857 | 0.001055     |  |
| C  | 4.092293  | -1.050097 | -0.001586    |  |
| C  | -4.803012 | -1.064148 | 0.000367     |  |
| C  | 4.225158  | 0.321128  | -0.001100    |  |
| C  | -4.145613 | 0.041361  | -0.000504    |  |
| C  | 3.079003  | -1.951368 | -0.000409    |  |
| C  | -2.873360 | 0.485932  | -0.000218    |  |
| C  | 4.167990  | 1.555982  | -0.000904    |  |
| O  | -2.490393 | 1.730036  | -0.001181    |  |
| C  | 1.708087  | -1.907173 | 0.001310     |  |
| C  | -1.760897 | -0.434864 | 0.000543     |  |
| Mg | 2.219037  | 2.212462  | -0.000238    |  |
| Mg | -0.585484 | 1.907574  | -0.000109    |  |
| C  | 0.529579  | -1.596302 | 0.001533     |  |
| C  | -0.697448 | -1.035041 | 0.001165     |  |

16

|    |           |           |              |  |
|----|-----------|-----------|--------------|--|
| 86 | t23       | scf done: | -1006.861254 |  |
| C  | -0.701151 | -0.220564 | 0.002217     |  |
| Mg | 2.510708  | 2.677596  | -0.002440    |  |
| C  | -1.978445 | -0.114072 | 0.002088     |  |

|    |           |           |           |
|----|-----------|-----------|-----------|
| O  | 2.858168  | 0.831589  | 0.000558  |
| C  | -3.272745 | -0.149546 | 0.002186  |
| C  | 0.595074  | 3.238967  | -0.003283 |
| Mg | 0.137517  | -2.102568 | 0.005126  |
| C  | 0.418380  | 2.007110  | -0.001364 |
| C  | 1.799165  | 0.050915  | 0.001851  |
| C  | -4.526455 | -0.219121 | 0.002489  |
| C  | 0.490139  | 0.583771  | 0.000947  |
| C  | -5.828850 | -0.313866 | 0.002729  |
| O  | 4.215301  | -2.519461 | 0.006116  |
| C  | 2.033405  | -1.384847 | 0.004068  |
| C  | 3.209096  | -1.944275 | 0.005000  |
| C  | -7.092224 | -0.439344 | 0.002895  |

16

|    |           |           |              |  |
|----|-----------|-----------|--------------|--|
| 87 | t83       | scf done: | -1006.855629 |  |
| C  | -2.572056 | 0.238069  | -0.009180    |  |
| O  | 0.963666  | 2.202851  | 0.058198     |  |
| C  | -0.151533 | -0.579714 | -0.015734    |  |
| C  | -5.057409 | 0.824041  | -0.008142    |  |
| C  | -1.304889 | 0.028807  | -0.007392    |  |
| O  | -7.430983 | 1.398837  | -0.008871    |  |
| C  | 4.490603  | -1.972264 | -0.025258    |  |
| C  | 4.179703  | -3.174673 | -0.056120    |  |
| C  | -0.182854 | 2.328092  | 0.055192     |  |
| C  | 1.066608  | -0.965403 | -0.018426    |  |
| C  | -3.804584 | 0.550346  | -0.008623    |  |
| C  | 4.592275  | -0.600416 | 0.008129     |  |
| C  | -6.294459 | 1.128977  | -0.008483    |  |
| C  | 4.454898  | 0.630301  | 0.037730     |  |
| Mg | 2.219064  | -2.674632 | -0.053784    |  |
| Mg | 2.424022  | 0.684674  | 0.028445     |  |

16

|    |           |           |              |  |
|----|-----------|-----------|--------------|--|
| 88 | t93       | scf done: | -1006.853201 |  |
| C  | -3.177188 | -2.690195 | -0.392201    |  |
| C  | -1.098529 | -1.214461 | -0.294338    |  |
| C  | 3.571877  | 0.174807  | 0.251903     |  |
| C  | -0.317126 | 1.285747  | -0.466720    |  |
| O  | -4.074175 | -3.443989 | -0.417410    |  |
| C  | 3.220192  | -1.132624 | 0.347115     |  |
| C  | -2.320836 | -1.736196 | -0.395800    |  |
| C  | 2.733344  | 3.795305  | -0.286755    |  |
| C  | -0.787750 | 0.150079  | -0.408581    |  |
| Mg | 0.926766  | 2.873974  | -0.456620    |  |
| C  | 2.764673  | -2.282709 | 0.408558     |  |
| O  | -4.261821 | 1.406186  | 0.445828     |  |
| C  | 3.255267  | 2.683899  | -0.081173    |  |
| C  | 3.610065  | 1.385523  | 0.120340     |  |
| Mg | 0.779470  | -2.091252 | 0.089364     |  |
| C  | -3.695229 | 0.838168  | 1.232846     |  |

16

|    |           |           |              |  |
|----|-----------|-----------|--------------|--|
| 89 | t22       | scf done: | -1006.855489 |  |
| C  | 3.212217  | -0.834229 | 0.017232     |  |
| O  | -4.268044 | 1.933457  | -0.006301    |  |
| C  | 3.290793  | 0.402499  | 0.014351     |  |
| C  | -3.136142 | 1.503133  | -0.002568    |  |

|    |           |           |           |
|----|-----------|-----------|-----------|
| C  | -0.286500 | -4.426450 | 0.016798  |
| C  | -1.954664 | 2.339629  | -0.001281 |
| C  | 2.616277  | -2.024690 | 0.018389  |
| C  | -2.822358 | 0.087420  | 0.001211  |
| C  | 0.782918  | -3.790122 | 0.017738  |
| C  | -0.914391 | 2.979093  | -0.000089 |
| Mg | -1.631574 | -2.913106 | 0.010341  |
| C  | -2.507977 | -1.091119 | 0.004126  |
| C  | 2.717624  | 1.651702  | 0.010146  |
| Mg | 1.096524  | 2.892860  | 0.004079  |
| C  | 1.889412  | -3.013793 | 0.018476  |
| O  | 3.138879  | 2.839818  | 0.010203  |

16

|    |           |           |              |  |
|----|-----------|-----------|--------------|--|
| 90 | c18       | scf done: | -1006.852644 |  |
| C  | -1.195662 | 2.225868  | 0.006985     |  |
| C  | -1.678217 | 0.951141  | 0.010143     |  |
| C  | -1.429444 | -0.271952 | 0.007757     |  |
| C  | -0.824428 | -1.447027 | 0.004580     |  |
| C  | 0.360816  | -1.869762 | -0.003128    |  |
| C  | 1.658465  | -1.610035 | -0.011515    |  |
| C  | 2.172481  | -0.451348 | -0.015103    |  |
| C  | 2.058457  | 0.853661  | -0.014671    |  |
| C  | 1.184968  | 1.763747  | -0.009486    |  |
| C  | 0.149653  | 2.606771  | -0.002140    |  |
| Mg | 0.734799  | 4.654667  | -0.006668    |  |
| O  | 1.447737  | 6.365827  | -0.009768    |  |
| Mg | -0.137088 | 7.242834  | 0.004129     |  |
| C  | -1.484832 | 5.705693  | 0.011486     |  |
| C  | -1.851535 | 4.523984  | 0.012923     |  |
| O  | -2.220154 | 3.268424  | 0.014473     |  |

16

|    |           |           |              |  |
|----|-----------|-----------|--------------|--|
| 91 | t76       | scf done: | -1006.855231 |  |
| C  | 2.573512  | 1.766835  | 0.117988     |  |
| C  | -4.697457 | -1.155991 | -0.113157    |  |
| C  | -2.164060 | 1.706659  | -0.167655    |  |
| C  | -3.947530 | -0.167347 | -0.140547    |  |
| C  | 2.957714  | 0.624970  | -0.024698    |  |
| C  | -1.312612 | -3.117171 | 0.062715     |  |
| Mg | -0.330173 | 2.547422  | -0.061498    |  |
| Mg | -3.245175 | -2.529838 | 0.001823     |  |
| C  | -3.067991 | 0.880224  | -0.162153    |  |
| C  | -0.147110 | -2.737437 | 0.036864     |  |
| C  | 3.315562  | -0.770989 | -0.202934    |  |
| C  | 1.097087  | -2.200601 | -0.016208    |  |
| C  | 1.762621  | 2.974162  | 0.230471     |  |
| C  | 2.163172  | -1.623428 | -0.080278    |  |
| O  | 2.221314  | 4.058075  | 0.524954     |  |
| O  | 4.434819  | -1.153935 | -0.449900    |  |

16

|    |           |           |              |  |
|----|-----------|-----------|--------------|--|
| 92 | c72       | scf done: | -1006.853064 |  |
| C  | -2.190840 | 0.000000  | -0.797508    |  |
| C  | -1.048709 | 0.000000  | -0.350055    |  |
| C  | 0.163130  | 0.000000  | 0.269838     |  |
| C  | 1.189045  | 0.000000  | 0.940730     |  |
| Mg | 2.088868  | -0.000000 | 2.732205     |  |

|    |           |           |           |
|----|-----------|-----------|-----------|
| C  | 2.289179  | -0.000000 | 4.866477  |
| C  | 0.826019  | -0.000000 | 4.933826  |
| C  | -0.283279 | -0.000000 | 4.392259  |
| C  | -1.519125 | -0.000000 | 3.865962  |
| C  | -2.623468 | -0.000000 | 3.341830  |
| C  | -3.813531 | 0.000000  | 2.718879  |
| C  | -4.922057 | 0.000000  | 2.182495  |
| C  | -5.811608 | 0.000000  | 1.023733  |
| O  | -7.014697 | 0.000000  | 1.027243  |
| Mg | -4.137273 | 0.000000  | -0.323985 |
| O  | 3.070027  | -0.000000 | 5.778874  |

16

|    |           |           |              |  |
|----|-----------|-----------|--------------|--|
| 93 | c36       | scf done: | -1006.855959 |  |
| O  | 2.753192  | -2.000774 | 0.059383     |  |
| C  | 1.521432  | -2.176173 | 0.047198     |  |
| C  | 0.297918  | -2.002125 | 0.032612     |  |
| C  | -0.648576 | -1.032620 | 0.015411     |  |
| C  | -1.107095 | 0.107991  | 0.002285     |  |
| C  | -0.589605 | 1.402039  | -0.001271    |  |
| C  | -0.893961 | 2.732714  | -0.013947    |  |
| C  | -1.791778 | 3.767784  | -0.030940    |  |
| C  | -2.105295 | 4.961393  | -0.042746    |  |
| C  | -1.851580 | 6.308765  | -0.049516    |  |
| C  | -1.109249 | 7.318334  | -0.048639    |  |
| Mg | 0.214290  | 5.696979  | -0.022909    |  |
| O  | 1.239719  | 4.110035  | -0.000624    |  |
| C  | 0.646566  | 2.972985  | 0.000996     |  |
| C  | 0.946275  | 1.630783  | 0.013772     |  |
| Mg | 2.076665  | -0.043061 | 0.038003     |  |

16

|    |           |           |              |  |
|----|-----------|-----------|--------------|--|
| 94 | t78       | scf done: | -1006.852069 |  |
| O  | -0.152644 | -2.419648 | -0.012392    |  |
| O  | 6.620785  | -0.072100 | 0.001199     |  |
| C  | 0.574059  | 1.165650  | 0.001331     |  |
| Mg | -1.316301 | 1.952997  | 0.002522     |  |
| C  | 2.936820  | 0.117885  | -0.000822    |  |
| C  | -3.728155 | -1.039687 | -0.011973    |  |
| C  | 5.461628  | 0.062281  | 0.000796     |  |
| Mg | 1.239447  | -1.159369 | -0.006588    |  |
| C  | -3.763842 | 1.506719  | -0.002221    |  |
| C  | -1.347366 | -2.036929 | -0.012485    |  |
| C  | -2.513057 | -1.679064 | -0.012703    |  |
| C  | -4.247422 | 0.209792  | -0.007854    |  |
| C  | 4.222857  | 0.418304  | 0.001136     |  |
| C  | 1.800824  | 0.943804  | 0.001343     |  |
| C  | -3.213690 | 2.621005  | 0.002932     |  |
| C  | -5.140008 | -0.886471 | -0.013083    |  |

16

|    |           |           |              |  |
|----|-----------|-----------|--------------|--|
| 95 | t53       | scf done: | -1006.854255 |  |
| O  | 4.463909  | 1.496689  | -0.006999    |  |
| C  | -4.124192 | -1.338834 | -0.034774    |  |
| C  | 0.363017  | 2.034012  | 0.001770     |  |
| C  | -2.859810 | -1.826384 | -0.039525    |  |
| C  | 1.342407  | 1.295537  | -0.007159    |  |
| C  | -5.201550 | -0.715352 | -0.025464    |  |

|    |           |           |           |
|----|-----------|-----------|-----------|
| C  | 3.791454  | 0.531699  | -0.017103 |
| C  | -1.646283 | -1.970754 | -0.041005 |
| Mg | -1.678321 | 2.250247  | 0.005563  |
| C  | -0.304459 | -1.901897 | -0.041264 |
| C  | 2.327261  | 0.312938  | -0.018643 |
| C  | 0.883519  | -1.629654 | -0.038974 |
| C  | 3.472416  | -1.747437 | -0.041816 |
| Mg | -4.267971 | 1.127640  | -0.004377 |
| C  | 2.140570  | -1.039856 | -0.033307 |
| O  | 4.369443  | -0.792440 | -0.031868 |

16

|    |           |           |              |  |
|----|-----------|-----------|--------------|--|
| 96 | t70       | scf done: | -1006.853823 |  |
| O  | -5.524447 | 0.886989  | 0.334226     |  |
| O  | 4.276600  | -0.683323 | 0.445477     |  |
| C  | -4.377386 | 0.575183  | 0.224875     |  |
| C  | 3.193246  | -0.873773 | -0.153684    |  |
| C  | -2.995814 | 0.899296  | 0.016374     |  |
| C  | 2.009041  | -1.536775 | -0.392000    |  |
| C  | -1.818881 | 1.600537  | -0.184229    |  |
| C  | 0.920332  | -2.373442 | -0.218199    |  |
| C  | -3.350283 | -0.417758 | 0.181829     |  |
| C  | -0.273079 | -2.531335 | -0.021159    |  |
| C  | -0.685480 | 2.033322  | -0.366019    |  |
| C  | 2.164587  | -0.225844 | -0.862767    |  |
| C  | -2.582671 | -1.566279 | 0.204112     |  |
| C  | -1.585959 | -2.262216 | 0.114212     |  |
| Mg | 4.033601  | 1.348154  | 0.742009     |  |
| Mg | 1.364588  | 1.753031  | -0.473264    |  |

16

|    |           |           |              |  |
|----|-----------|-----------|--------------|--|
| 97 | c1        | scf done: | -1006.853770 |  |
| C  | 1.104272  | -1.833452 | 0.131196     |  |
| C  | -0.058042 | -1.473230 | 0.093274     |  |
| C  | -1.336281 | -0.866456 | 0.037927     |  |
| C  | -1.486869 | 0.494989  | -0.053664    |  |
| C  | -0.372255 | 1.367209  | -0.097888    |  |
| C  | 0.682878  | 1.973923  | -0.125373    |  |
| C  | 2.004769  | 2.272978  | -0.129302    |  |
| C  | 3.198397  | 2.007425  | -0.097405    |  |
| C  | 4.153504  | 1.047556  | -0.022433    |  |
| C  | 4.288051  | -0.168170 | 0.059581     |  |
| C  | 3.566026  | -1.314197 | 0.126665     |  |
| C  | 2.459459  | -1.835129 | 0.147715     |  |
| O  | -2.491947 | -1.576581 | 0.070935     |  |
| Mg | -3.623740 | -0.518289 | -1.314056    |  |
| Mg | -3.654930 | -0.347299 | 1.277289     |  |
| O  | -2.769497 | 0.934609  | -0.098101    |  |

16

|    |           |           |              |  |
|----|-----------|-----------|--------------|--|
| 98 | t74       | scf done: | -1006.847379 |  |
| Mg | 2.810695  | 0.805811  | 0.058823     |  |
| C  | -1.295287 | 1.300276  | 0.025427     |  |
| C  | 0.099836  | -0.681430 | -0.074542    |  |
| C  | -1.090177 | -1.460681 | -0.053004    |  |
| C  | 3.865118  | -1.850398 | -0.078369    |  |
| C  | -3.852765 | 1.790752  | -0.322779    |  |
| O  | 1.022464  | 1.517297  | 0.138841     |  |

|    |           |           |           |
|----|-----------|-----------|-----------|
| C  | 4.527939  | -0.649645 | -0.027047 |
| C  | 1.372965  | -1.197368 | -0.107525 |
| Mg | -3.385501 | -0.559606 | 0.233748  |
| C  | 4.918272  | 0.549633  | 0.059663  |
| C  | -2.145749 | -2.101565 | -0.004964 |
| C  | 0.005210  | 0.748818  | 0.023940  |
| O  | -4.681635 | 0.866863  | -0.070855 |
| C  | -2.491307 | 1.577775  | 0.131456  |
| C  | 2.544517  | -1.643106 | -0.117043 |

16

99 t67 scf done: -1006.845821

|    |           |           |           |
|----|-----------|-----------|-----------|
| O  | -8.360301 | -1.051148 | -0.061772 |
| Mg | 4.104222  | -0.239478 | 0.106165  |
| C  | -7.213900 | -0.838828 | -0.038409 |
| O  | 5.691635  | -2.059487 | 0.013638  |
| C  | -5.962865 | -0.607625 | -0.012624 |
| C  | 2.311436  | -1.229919 | 0.029283  |
| C  | -4.702069 | -0.373199 | 0.013867  |
| C  | 6.281239  | -3.020013 | -0.043052 |
| C  | -3.460164 | -0.142588 | 0.039090  |
| Mg | 3.500221  | 2.465070  | 0.259658  |
| C  | -2.190218 | 0.093114  | 0.065367  |
| C  | 0.917375  | 1.873384  | 0.200132  |
| C  | -0.958413 | 0.321242  | 0.090655  |
| C  | 1.509245  | 2.957287  | 0.269752  |
| C  | 0.361068  | 0.565156  | 0.117567  |
| C  | 1.350877  | -0.455034 | 0.066583  |

16

100 t77 scf done: -1006.846741

|    |           |           |           |
|----|-----------|-----------|-----------|
| C  | -1.306630 | -1.521513 | 0.534985  |
| C  | 3.262244  | -0.250292 | -0.152226 |
| C  | -4.364066 | 1.103418  | -0.508674 |
| C  | 1.135441  | -1.596459 | 0.286433  |
| C  | 4.573549  | -0.144706 | -0.178051 |
| C  | 2.323310  | -1.161024 | 0.113803  |
| C  | -3.126807 | -1.041513 | -1.005880 |
| O  | 5.681105  | 0.143938  | -0.270885 |
| C  | -0.637879 | 1.928630  | 0.078328  |
| O  | -1.716630 | -0.750017 | 1.456592  |
| Mg | -2.415000 | 0.943987  | 0.528872  |
| C  | -0.031473 | -2.059467 | 0.556532  |
| C  | -2.181120 | -1.708186 | -0.592119 |
| Mg | 1.536035  | 1.045619  | -0.205462 |
| C  | -3.965525 | 0.022029  | -0.993650 |
| C  | 0.342468  | 2.625150  | -0.258580 |

16

101 t89 scf done: -1006.848428

|    |           |           |           |
|----|-----------|-----------|-----------|
| C  | 4.012128  | -0.031446 | 0.409525  |
| Mg | -4.074298 | 0.135381  | 0.621249  |
| C  | 3.196961  | 0.885671  | 0.535445  |
| C  | -2.902336 | -1.615780 | 0.219149  |
| O  | 4.488177  | -1.170381 | 0.182143  |
| O  | -2.782895 | -2.791245 | 0.154726  |
| C  | -2.186338 | 0.728589  | -0.069393 |
| C  | 2.174926  | 1.763244  | 0.453504  |



|    |           |           |           |
|----|-----------|-----------|-----------|
| C  | -1.823505 | -0.575449 | -0.187953 |
| C  | 1.075413  | 2.263728  | 0.280297  |
| C  | -0.540520 | -1.077606 | -0.494304 |
| C  | -0.193388 | 2.472463  | -0.198079 |
| C  | -1.391616 | 1.843373  | -0.350444 |
| Mg | 2.529520  | -1.398361 | -0.253412 |
| C  | -1.195858 | 3.106111  | -0.954562 |
| C  | 0.580965  | -1.547543 | -0.633219 |

16

|                   |              |           |           |
|-------------------|--------------|-----------|-----------|
| 102 t48 scf done: | -1006.845929 |           |           |
| O                 | -3.646988    | -0.256524 | -0.671906 |
| C                 | 3.902979     | -0.427473 | -0.087793 |
| C                 | 3.678951     | 0.895768  | -0.105404 |
| C                 | 1.914536     | 2.716453  | -0.074166 |
| O                 | -1.825443    | 0.598113  | 0.416831  |
| C                 | 3.002553     | 1.915839  | -0.101362 |
| Mg                | -1.101298    | 2.512970  | 0.098400  |
| C                 | -3.150680    | 2.061795  | 0.158563  |
| C                 | 0.788195     | 3.213489  | -0.033830 |
| C                 | 2.669397     | -2.603339 | -0.009280 |
| C                 | -3.103705    | 0.771497  | -0.191069 |
| Mg                | -2.175144    | -1.381148 | -0.009106 |
| C                 | 1.555943     | -3.109963 | 0.029502  |
| C                 | 3.566318     | -1.605775 | -0.053893 |
| C                 | -1.011573    | -3.024586 | 0.077334  |
| C                 | 0.207937     | -3.201165 | 0.059445  |

16

|                   |              |           |           |
|-------------------|--------------|-----------|-----------|
| 103 t45 scf done: | -1006.848326 |           |           |
| C                 | -4.166956    | -0.704975 | -0.005608 |
| Mg                | 5.822295     | -0.383160 | -0.003382 |
| C                 | -1.684031    | -1.976186 | 0.001233  |
| C                 | -2.805437    | -1.179629 | -0.001875 |
| C                 | -2.246590    | 1.305420  | -0.001635 |
| C                 | -3.041948    | 0.168721  | -0.003052 |
| O                 | -5.340578    | -0.915550 | -0.008604 |
| O                 | -0.064062    | 4.096623  | 0.002699  |
| Mg                | 2.699510     | -0.757243 | 0.008272  |
| C                 | 0.788438     | -2.631836 | 0.006714  |
| C                 | 1.855396     | 1.108851  | 0.007460  |
| C                 | -0.118958    | 2.889164  | 0.002705  |
| C                 | 2.025237     | -2.689106 | 0.009630  |
| C                 | 1.010559     | 1.991421  | 0.005314  |
| C                 | -0.549290    | -2.416940 | 0.003796  |
| C                 | -1.356841    | 2.124675  | 0.000140  |

16

|                   |              |           |           |
|-------------------|--------------|-----------|-----------|
| 104 t80 scf done: | -1006.847384 |           |           |
| C                 | 0.887063     | -2.575304 | 0.000114  |
| Mg                | -1.756103    | 2.530037  | -0.000306 |
| C                 | -0.395369    | -2.099437 | -0.000745 |
| C                 | 1.748571     | 2.606159  | 0.000110  |
| C                 | 2.061388     | -2.130174 | 0.000846  |
| C                 | 0.310590     | 2.627408  | 0.000050  |
| O                 | 4.392080     | 0.361697  | 0.002101  |
| O                 | -3.103790    | 1.352830  | -0.000933 |
| C                 | -1.693628    | -2.610165 | -0.001281 |

|    |           |           |           |
|----|-----------|-----------|-----------|
| C  | 0.970706  | 1.446406  | 0.000060  |
| C  | 3.359867  | -0.097536 | 0.001604  |
| Mg | -2.595725 | -0.399196 | -0.001109 |
| C  | 2.143991  | -0.735992 | 0.000982  |
| C  | 0.886327  | 0.005393  | -0.000020 |
| C  | -0.322291 | -0.643131 | -0.000878 |
| C  | -2.939886 | -2.588083 | -0.000923 |

16

105 c29 scf done: -1006.842496

|    |           |           |           |
|----|-----------|-----------|-----------|
| C  | -1.002775 | 2.656949  | -0.009662 |
| C  | -1.646127 | 1.427368  | -0.029541 |
| C  | -1.205679 | 0.167266  | -0.036024 |
| C  | -0.975342 | -1.088859 | -0.045141 |
| Mg | 1.030079  | -0.716665 | -0.016081 |
| O  | 2.324809  | -2.602977 | -0.005787 |
| C  | 2.883918  | -3.583646 | 0.008957  |
| C  | 2.196897  | 0.955710  | 0.014609  |
| C  | 1.336016  | 1.841114  | 0.012239  |
| C  | 0.406746  | 2.914795  | 0.010746  |
| O  | 0.901969  | 4.105794  | 0.028540  |
| Mg | 0.001179  | 5.759792  | 0.032941  |
| C  | -1.324404 | 7.412492  | 0.031609  |
| C  | -2.036861 | 6.387191  | 0.012649  |
| C  | -2.181778 | 5.011939  | -0.002229 |
| C  | -1.762629 | 3.864231  | -0.007826 |

16

106 c78 scf done: -1006.842243

|    |           |           |           |
|----|-----------|-----------|-----------|
| C  | -3.246723 | -2.395971 | 0.288167  |
| Mg | -3.175167 | -0.373505 | -0.467181 |
| C  | -2.277852 | 1.398968  | -0.768741 |
| C  | -1.089645 | 1.611619  | -0.518561 |
| C  | 0.228086  | 1.724482  | -0.230095 |
| C  | 1.407776  | 1.639830  | 0.061173  |
| C  | 2.688509  | 1.316592  | 0.368640  |
| C  | 3.836216  | 0.946255  | 0.652323  |
| Mg | 3.875986  | -1.042380 | 0.357793  |
| C  | 3.276986  | -2.995114 | -0.333432 |
| C  | 1.855530  | -3.193231 | -0.250249 |
| C  | 0.652922  | -3.054957 | -0.070122 |
| C  | -0.678031 | -2.941192 | 0.096611  |
| C  | -1.890114 | -2.875246 | 0.263684  |
| O  | 4.059690  | -3.766439 | -0.855640 |
| O  | -4.200569 | -2.976872 | 0.760600  |

16

107 t72 scf done: -1006.841495

|    |           |           |           |
|----|-----------|-----------|-----------|
| C  | -4.694494 | 1.415400  | -0.034893 |
| C  | 2.311739  | 1.230484  | 0.025623  |
| Mg | -3.008131 | 2.571630  | 0.014860  |
| C  | -2.351196 | -1.373020 | -0.095081 |
| C  | 2.896948  | -2.316156 | -0.074450 |
| C  | 3.408961  | 0.286421  | 0.008364  |
| C  | 1.295337  | 1.893413  | 0.035497  |
| O  | 4.575343  | 0.607684  | 0.029004  |
| Mg | 0.798006  | -2.066581 | -0.086579 |
| O  | 2.412782  | -3.444567 | -0.113768 |

|   |           |           |           |
|---|-----------|-----------|-----------|
| C | -1.037132 | 2.996752  | 0.045752  |
| C | 0.095023  | 2.527192  | 0.042692  |
| C | 2.917690  | -1.068637 | -0.036246 |
| C | -4.114299 | 0.287686  | -0.062804 |
| C | -1.197549 | -1.840880 | -0.098331 |
| C | -3.620134 | -0.951523 | -0.094458 |

16

108 t95 scf done: -1006.845141

|    |           |           |           |
|----|-----------|-----------|-----------|
| O  | 2.139675  | 3.706117  | -0.094503 |
| Mg | -0.452347 | -3.536971 | -0.578780 |
| C  | 1.897800  | 2.574157  | -0.054119 |
| C  | 2.780771  | -2.023137 | 0.097500  |
| C  | 1.744898  | 1.276154  | 0.005758  |
| C  | -0.798797 | -1.605831 | 0.329492  |
| C  | -1.951623 | 1.376159  | -0.279314 |
| C  | -2.008392 | -1.046236 | 0.482469  |
| C  | -0.743159 | 1.238274  | -0.216083 |
| C  | 1.632308  | -1.547256 | 0.122135  |
| C  | -3.311157 | 0.874415  | 0.009639  |
| Mg | 3.320607  | -0.070500 | 0.010509  |
| O  | -4.352708 | 1.390489  | -0.283547 |
| C  | 0.387722  | -0.840257 | 0.130452  |
| C  | 0.482869  | 0.572316  | -0.031959 |
| C  | -3.077524 | -0.416036 | 0.691885  |

16

109 t92 scf done: -1006.839222

|    |           |           |           |
|----|-----------|-----------|-----------|
| Mg | 2.450853  | 1.516980  | -1.101762 |
| C  | -1.816416 | 2.397289  | 0.421823  |
| C  | -2.953403 | 1.934675  | 0.391053  |
| C  | -3.786056 | -1.403303 | -0.081556 |
| C  | -0.488838 | 2.146042  | 0.151788  |
| C  | -1.473452 | -2.452105 | -0.310868 |
| C  | -3.994889 | 1.081880  | 0.354657  |
| Mg | 1.375445  | -0.963692 | -0.149830 |
| C  | -0.244153 | -2.322183 | -0.306396 |
| O  | 4.211805  | -1.548604 | 1.635026  |
| C  | 3.162365  | -1.491130 | 1.241664  |
| C  | -2.755832 | -2.067234 | -0.232333 |
| C  | -4.123425 | -0.123192 | 0.114556  |
| C  | 0.446315  | 1.125494  | 0.194834  |
| O  | 2.881069  | -0.222611 | -1.000925 |
| C  | 0.722187  | 2.391259  | -0.434085 |

16

110 t69 scf done: -1006.839335

|   |           |           |           |
|---|-----------|-----------|-----------|
| C | 1.333185  | -2.214377 | -0.021386 |
| C | 2.661691  | -2.339605 | -0.024679 |
| C | -1.090743 | 1.569133  | -0.021654 |
| O | -6.509619 | -0.981069 | 0.000237  |
| O | 3.707201  | 1.260938  | -0.033192 |
| C | -0.884076 | -0.951047 | -0.017555 |
| C | 0.039120  | 2.308908  | -0.026473 |
| C | 0.270593  | -1.517928 | -0.019756 |
| C | -4.144404 | -0.388724 | -0.009455 |
| C | -5.392165 | -0.703686 | -0.004288 |
| C | 3.915181  | -2.480515 | -0.027541 |

|    |           |           |           |
|----|-----------|-----------|-----------|
| C  | -1.240743 | 2.957839  | -0.023311 |
| C  | -1.602185 | 0.220318  | -0.017736 |
| Mg | 2.083988  | 2.022452  | -0.030529 |
| C  | -2.929062 | -0.087745 | -0.013392 |
| Mg | 4.240517  | -0.452339 | -0.031587 |

16

111 c27 scf done: -1006.833772

|    |           |           |           |
|----|-----------|-----------|-----------|
| C  | -0.335322 | 2.497014  | 0.103415  |
| C  | -0.536938 | 1.175506  | -0.039894 |
| C  | -1.006969 | -0.003424 | -0.124543 |
| C  | -1.337833 | -1.268367 | -0.124353 |
| C  | -0.223252 | -2.086688 | -0.180342 |
| C  | 0.895022  | -2.662188 | -0.121471 |
| Mg | 1.397961  | -0.579625 | 0.056758  |
| O  | 2.412386  | 1.073783  | 0.314820  |
| C  | 1.942662  | 2.202183  | 0.309918  |
| C  | 1.038299  | 3.069095  | -0.166456 |
| O  | 1.231151  | 4.285439  | -0.601684 |
| Mg | 0.051467  | 5.717779  | -0.487378 |
| C  | -1.527569 | 7.065188  | -0.085868 |
| C  | -1.941642 | 5.943499  | 0.278575  |
| C  | -1.825987 | 4.588669  | 0.488005  |
| C  | -1.287417 | 3.494632  | 0.380496  |

16

112 c40 scf done: -1006.844604

|    |           |           |           |
|----|-----------|-----------|-----------|
| Mg | -0.000000 | 4.337491  | -0.179255 |
| Mg | -0.000000 | -4.337491 | -0.179255 |
| C  | -1.842768 | 3.526131  | -0.179522 |
| C  | 1.842768  | 3.526131  | -0.179522 |
| C  | -1.381535 | 2.377899  | -0.179940 |
| C  | 1.381535  | 2.377899  | -0.179940 |
| C  | -0.678839 | 1.151254  | -0.180444 |
| C  | 0.678839  | 1.151254  | -0.180444 |
| C  | -1.842768 | -3.526131 | -0.179522 |
| C  | 1.842768  | -3.526131 | -0.179522 |
| C  | -1.381535 | -2.377899 | -0.179940 |
| C  | 1.381535  | -2.377899 | -0.179940 |
| C  | -0.678839 | -1.151254 | -0.180444 |
| C  | 0.678839  | -1.151254 | -0.180444 |
| O  | 1.427239  | 0.000000  | -0.180913 |
| O  | -1.427239 | -0.000000 | -0.180913 |

16

113 t99 scf done: -1006.841411

|    |           |           |           |
|----|-----------|-----------|-----------|
| C  | 4.658674  | -1.469540 | -0.063795 |
| Mg | -2.980192 | 2.073809  | -0.019752 |
| C  | 4.376630  | -0.256750 | 0.033040  |
| C  | 0.357542  | 2.082535  | 0.110529  |
| Mg | 2.634293  | -1.804486 | -0.156612 |
| C  | -0.964401 | 1.728364  | 0.022797  |
| C  | 0.655121  | -1.392646 | -0.188643 |
| C  | 1.576887  | 2.200881  | 0.158141  |
| C  | -2.744683 | 0.018923  | -0.073715 |
| C  | 3.802271  | 0.974259  | 0.121744  |
| C  | 2.829702  | 1.718404  | 0.156682  |
| C  | -3.230677 | -1.288498 | 0.259678  |

|   |           |           |           |
|---|-----------|-----------|-----------|
| C | -1.291995 | 0.383275  | -0.075018 |
| O | -3.561642 | -2.134955 | 1.020284  |
| O | -3.167962 | -1.112530 | -1.050816 |
| C | -0.286509 | -0.611049 | -0.144845 |

16

114 t60 scf done: -1006.837907

|    |           |           |           |
|----|-----------|-----------|-----------|
| C  | 0.139445  | 1.813679  | 0.000000  |
| C  | -1.856686 | -1.424269 | -0.000000 |
| C  | -0.722780 | -0.796375 | -0.000000 |
| C  | 1.428299  | 2.418470  | 0.000000  |
| C  | 0.734185  | -0.758254 | 0.000000  |
| C  | 2.590595  | 2.806745  | 0.000000  |
| C  | 0.045970  | 0.389565  | 0.000000  |
| Mg | 2.763875  | -1.103200 | 0.000000  |
| C  | -0.974664 | 2.555259  | 0.000000  |
| O  | -1.921587 | 3.197075  | -0.000000 |
| C  | -4.081432 | -2.659812 | -0.000000 |
| C  | -2.975391 | -2.043439 | -0.000000 |
| O  | 4.331806  | -0.221266 | 0.000000  |
| Mg | 4.177816  | 1.574468  | 0.000000  |
| C  | -5.215130 | -3.294484 | -0.000000 |
| C  | -6.326781 | -3.920855 | -0.000000 |

16

115 t62 scf done: -1006.831120

|    |           |           |           |
|----|-----------|-----------|-----------|
| C  | -1.121241 | 1.694780  | -0.319673 |
| C  | 8.650156  | -0.412823 | -0.026966 |
| C  | -6.809211 | -1.479799 | 0.203512  |
| C  | 7.381720  | -0.278296 | -0.044478 |
| O  | -5.784981 | -1.010467 | 0.124375  |
| C  | 6.087645  | -0.144858 | -0.060948 |
| C  | -2.457658 | 1.902795  | -0.346775 |
| C  | 4.835873  | -0.018396 | -0.075561 |
| C  | 0.006225  | 1.195571  | -0.245789 |
| C  | 3.548979  | 0.101540  | -0.087975 |
| C  | -3.705205 | 1.895424  | -0.340361 |
| C  | 2.297326  | 0.243681  | -0.105255 |
| C  | 0.982989  | 0.240076  | -0.098594 |
| Mg | -0.710099 | -1.060516 | 0.114398  |
| Mg | -3.724776 | -0.153456 | -0.016326 |
| O  | -2.466398 | -1.436178 | 0.181619  |

16

116 c14 scf done: -1006.835096

|    |           |           |           |
|----|-----------|-----------|-----------|
| C  | -0.373711 | 2.379601  | 0.007488  |
| C  | -1.268028 | 1.264185  | 0.027155  |
| C  | -1.085459 | -0.015907 | 0.023688  |
| C  | -0.777462 | -1.266987 | 0.017691  |
| C  | 0.373715  | -1.832710 | -0.007154 |
| C  | 1.652610  | -2.041472 | -0.034802 |
| C  | 2.338731  | -0.938787 | -0.050221 |
| C  | 2.668566  | 0.298701  | -0.057740 |
| C  | 1.905677  | 1.342121  | -0.041594 |
| C  | 1.044507  | 2.299520  | -0.023244 |
| Mg | 0.342205  | 4.364809  | -0.010063 |
| C  | -1.328367 | 5.620620  | 0.024101  |
| C  | -1.055532 | 6.896494  | 0.018215  |

|    |           |          |          |
|----|-----------|----------|----------|
| O  | -0.649000 | 8.001945 | 0.009189 |
| O  | -2.551074 | 4.983077 | 0.049449 |
| Mg | -2.291361 | 3.157281 | 0.047840 |

16

117 c45 scf done: -1006.829229

|    |           |           |           |
|----|-----------|-----------|-----------|
| C  | 1.995382  | 0.449118  | 0.220138  |
| C  | 1.737717  | 1.704197  | -0.021664 |
| C  | 0.924119  | 2.678492  | -0.400750 |
| O  | 1.204439  | 3.719298  | -1.137279 |
| Mg | 0.622895  | 5.464230  | -0.828476 |
| C  | -0.117212 | 7.276201  | -0.021933 |
| C  | -0.734739 | 6.363970  | 0.568839  |
| C  | -1.018970 | 5.044809  | 0.846813  |
| C  | -0.924944 | 3.844583  | 0.632723  |
| C  | -0.524210 | 2.579013  | 0.154185  |
| C  | -1.313686 | 1.533771  | -0.079718 |
| C  | -1.225770 | 0.242606  | -0.409229 |
| C  | -1.316552 | -0.992661 | -0.687258 |
| Mg | 0.591410  | -1.458270 | -0.250246 |
| O  | 2.279863  | -1.901649 | 0.742774  |
| C  | 2.436269  | -0.668389 | 0.659151  |

16

118 c51 scf done: -1006.826873

|    |           |           |           |
|----|-----------|-----------|-----------|
| O  | -4.554538 | 2.042272  | 0.001727  |
| C  | -3.751352 | 0.993093  | -0.000180 |
| C  | -2.773762 | 0.285205  | -0.001356 |
| C  | -1.543957 | -0.276343 | -0.002964 |
| C  | -0.339579 | -0.458923 | -0.003889 |
| C  | 1.011737  | -0.379696 | -0.004315 |
| C  | 2.209821  | -0.110003 | -0.005473 |
| Mg | 3.538753  | 1.395334  | -0.003119 |
| O  | 5.275851  | 2.506863  | -0.000698 |
| C  | 4.318032  | 3.307748  | 0.000808  |
| C  | 3.148863  | 3.752568  | 0.001619  |
| Mg | 1.392740  | 4.701243  | 0.002870  |
| C  | -0.584545 | 5.084600  | 0.004324  |
| C  | -1.720250 | 4.623740  | 0.004132  |
| C  | -2.882576 | 3.913621  | 0.003571  |
| C  | -3.799218 | 3.131178  | 0.002942  |

16

119 c74 scf done: -1006.825602

|    |           |           |           |
|----|-----------|-----------|-----------|
| C  | -3.006853 | -1.636726 | -0.001065 |
| C  | -2.108417 | -2.458558 | -0.000697 |
| Mg | -0.102265 | -2.514525 | -0.000189 |
| C  | 1.846610  | -1.993790 | -0.000548 |
| C  | 2.877492  | -1.322530 | 0.000187  |
| Mg | 4.120468  | 0.239957  | -0.003170 |
| O  | 5.578282  | 1.613891  | 0.004375  |
| C  | 4.554628  | 2.339132  | 0.003957  |
| C  | 3.379429  | 2.711454  | 0.001687  |
| C  | 2.070101  | 3.035447  | 0.001150  |
| C  | 0.849328  | 3.078980  | 0.000297  |
| C  | -0.466629 | 2.807000  | -0.000310 |
| C  | -1.579114 | 2.305748  | -0.000899 |
| C  | -2.612766 | 1.435382  | -0.001268 |

|   |           |           |           |
|---|-----------|-----------|-----------|
| C | -3.362880 | 0.490178  | -0.001634 |
| O | -3.939037 | -0.690437 | -0.001711 |

16

120 c50 scf done: -1006.823105

|    |           |           |           |
|----|-----------|-----------|-----------|
| C  | 2.344571  | 0.046349  | -0.449168 |
| C  | 1.605337  | -0.903890 | -0.207603 |
| C  | 0.360311  | -1.288861 | 0.121986  |
| C  | -0.828633 | -1.308548 | 0.414601  |
| C  | -2.023069 | -0.709902 | 0.669292  |
| C  | -3.065189 | -0.057585 | 0.882989  |
| Mg | -2.221052 | 1.737511  | 0.561702  |
| C  | -1.936974 | 3.826500  | 0.358887  |
| C  | -1.822616 | 5.088874  | 0.250371  |
| C  | -1.107594 | 6.177225  | 0.005806  |
| C  | 0.099512  | 6.342347  | -0.300386 |
| Mg | 0.783912  | 4.304641  | -0.338097 |
| O  | -0.775765 | 3.074587  | 0.122415  |
| O  | 2.544594  | 3.700225  | -0.730870 |
| C  | 2.747288  | 2.471346  | -0.702144 |
| C  | 2.894288  | 1.254232  | -0.660712 |

16

121 t91 scf done: -1006.829159

|    |           |           |          |
|----|-----------|-----------|----------|
| Mg | -1.437619 | 2.661704  | 0.000000 |
| O  | 4.689990  | -1.573310 | 0.000000 |
| O  | -2.939804 | 1.566579  | 0.000000 |
| C  | -2.632760 | 0.316131  | 0.000000 |
| C  | 3.664375  | -1.021881 | 0.000000 |
| C  | 0.300302  | 1.678411  | 0.000000 |
| C  | 0.673150  | -1.931946 | 0.000000 |
| C  | -3.603075 | -0.786976 | 0.000000 |
| C  | -0.450937 | -2.507189 | 0.000000 |
| C  | 0.010021  | 0.317962  | 0.000000 |
| C  | 2.584813  | -0.307907 | 0.000000 |
| C  | -1.328646 | -0.296224 | 0.000000 |
| C  | 1.205596  | -0.711036 | 0.000000 |
| C  | -3.007398 | -1.867969 | 0.000000 |
| C  | -1.571811 | -1.765661 | 0.000000 |
| Mg | 2.316208  | 1.714546  | 0.000000 |

16

122 c19 scf done: -1006.824480

|    |           |           |           |
|----|-----------|-----------|-----------|
| C  | -0.942056 | 2.269543  | 0.000931  |
| C  | -1.534886 | 1.033542  | 0.003919  |
| C  | -1.362245 | -0.198428 | 0.004962  |
| C  | -0.971853 | -1.469728 | 0.005556  |
| C  | 0.226725  | -1.866066 | 0.003008  |
| C  | 1.547996  | -1.873254 | -0.000254 |
| C  | 2.054860  | -0.701008 | -0.003133 |
| C  | 2.195281  | 0.593971  | -0.005128 |
| C  | 1.365136  | 1.551203  | -0.004364 |
| C  | 0.440679  | 2.495550  | -0.003077 |
| Mg | 0.961105  | 4.553080  | -0.007550 |
| Mg | 0.720629  | 7.356101  | -0.001342 |
| O  | -1.244386 | 7.042871  | 0.002520  |
| C  | -1.399580 | 5.805130  | 0.002240  |
| C  | -1.293832 | 4.569558  | -0.000448 |

|     |                            |           |           |
|-----|----------------------------|-----------|-----------|
| O   | -1.817554                  | 3.350428  | 0.002160  |
| 16  |                            |           |           |
| 123 | c13 scf done: -1006.817738 |           |           |
| C   | -0.926695                  | 2.282763  | 0.026922  |
| C   | -1.445325                  | 1.005673  | 0.039794  |
| C   | -1.269099                  | -0.224160 | 0.029450  |
| C   | -0.847939                  | -1.487685 | 0.010968  |
| C   | 0.365451                   | -1.840267 | -0.030148 |
| C   | 1.682542                   | -1.794883 | -0.073439 |
| C   | 2.150438                   | -0.602280 | -0.083766 |
| C   | 2.258477                   | 0.690447  | -0.082093 |
| C   | 1.425909                   | 1.648835  | -0.050038 |
| C   | 0.479169                   | 2.562384  | -0.016865 |
| Mg  | 0.370351                   | 4.686849  | -0.000725 |
| O   | 0.152151                   | 6.470491  | 0.783810  |
| O   | 0.104742                   | 6.476633  | -0.756739 |
| Mg  | -1.625179                  | 6.558745  | 0.067581  |
| C   | -2.199785                  | 4.607109  | 0.077758  |
| C   | -1.729191                  | 3.471838  | 0.057528  |

|     |                            |           |           |
|-----|----------------------------|-----------|-----------|
| 16  |                            |           |           |
| 124 | c59 scf done: -1006.808350 |           |           |
| Mg  | 1.667629                   | -0.119524 | -1.368910 |
| C   | -0.086912                  | -0.001863 | 0.013420  |
| Mg  | 1.653343                   | 0.059672  | 1.414823  |
| C   | -0.967383                  | 1.100262  | -0.060180 |
| C   | -1.884402                  | 1.901337  | -0.120501 |
| C   | -3.266982                  | 2.226612  | -0.150147 |
| C   | -4.308857                  | 1.288432  | -0.094529 |
| C   | -4.259113                  | 0.005380  | -0.009718 |
| C   | -4.325402                  | -1.279456 | 0.073528  |
| C   | -3.282627                  | -2.216337 | 0.139537  |
| C   | -1.899535                  | -1.893112 | 0.126225  |
| C   | -0.977378                  | -1.097129 | 0.079274  |
| C   | -3.748873                  | 3.491821  | -0.236640 |
| C   | -3.769902                  | -3.480257 | 0.218095  |
| O   | -4.178483                  | 4.547971  | -0.308999 |
| O   | -4.204209                  | -4.534872 | 0.283373  |

|     |                            |            |           |
|-----|----------------------------|------------|-----------|
| 16  |                            |            |           |
| 125 | c71 scf done: -1006.799876 |            |           |
| C   | -0.000000                  | 0.614026   | 0.416585  |
| C   | 0.000000                   | -0.614026  | 0.416585  |
| C   | -0.000000                  | 1.945671   | 0.350343  |
| C   | 0.000000                   | -1.945671  | 0.350343  |
| C   | -0.000000                  | 3.166123   | 0.228584  |
| C   | 0.000000                   | -3.166123  | 0.228584  |
| C   | -0.000000                  | 4.495796   | 0.041728  |
| C   | 0.000000                   | -4.495796  | 0.041728  |
| C   | 0.000000                   | 5.716238   | -0.134097 |
| C   | 0.000000                   | -5.716238  | -0.134097 |
| Mg  | 0.000000                   | 7.543045   | -1.009129 |
| Mg  | 0.000000                   | -7.543045  | -1.009129 |
| C   | -0.000000                  | 9.350588   | 0.338818  |
| C   | 0.000000                   | -9.350588  | 0.338818  |
| O   | -0.000000                  | 10.457477  | 0.582223  |
| O   | 0.000000                   | -10.457477 | 0.582223  |



16  
 126 c33 scf done: -1006.801338  
 Mg -1.236280 2.673554 -0.000821  
 O -1.025118 0.745188 -0.004596  
 C 0.153951 0.220190 -0.003788  
 C 0.429691 -1.104768 -0.006080  
 C 0.766715 -2.304397 -0.008017  
 C 1.111253 -3.565842 -0.010074  
 C 1.452724 -4.791061 -0.011974  
 C 1.218347 1.200486 -0.000030  
 C 1.418454 2.418253 0.002903  
 C 0.833389 3.691796 0.004660  
 O 1.430799 4.804671 0.007946  
 Mg 0.352923 6.379525 0.009546  
 C -1.135925 7.733800 0.010038  
 C -1.858352 6.715586 0.006733  
 C -2.409177 5.458256 0.003187  
 C -2.557373 4.237255 0.000366

16  
 127 c86 scf done: -1006.799195  
 Mg 0.093772 0.000000 1.000000  
 C 1.706239 0.000000 1.000000  
 C -1.575684 0.000000 1.000000  
 C 3.000181 0.000000 1.000000  
 C -2.915151 0.000000 1.000000  
 C 4.493427 0.000000 1.000000  
 C -4.370693 0.000000 1.000000  
 C 5.881820 0.000000 1.000000  
 C -5.796027 0.000000 1.000000  
 C 7.256652 0.000000 1.000000  
 Mg -7.171098 0.000000 1.000000  
 C 8.611125 0.000000 1.000000  
 C -9.249143 0.000000 1.000000  
 C 10.056204 0.000000 1.000000  
 O -10.688104 0.000000 1.000000  
 O 11.483913 0.000000 1.000000

16  
 128 c21 scf done: -1006.799877  
 C -2.719300 5.190287 0.052883  
 Mg -2.392898 3.000640 0.049510  
 C -1.234965 1.183014 0.026203  
 C -1.049960 -0.090868 0.023370  
 C -0.745123 -1.347843 0.017320  
 C 0.415422 -1.890477 -0.007617  
 C 1.698454 -2.094094 -0.035314  
 C 2.355439 -0.973247 -0.049956  
 C 2.672919 0.268193 -0.057431  
 C 1.898259 1.303485 -0.041789  
 C 1.033670 2.257423 -0.024047  
 Mg 0.362816 4.304428 -0.011401  
 C -1.123206 5.945301 0.019297  
 O -1.109135 7.125848 0.021181  
 C -0.386946 2.324320 0.006790  
 O -3.640683 5.928285 0.069357

16

129 c20 scf done: -1006.803856

|    |           |           |           |
|----|-----------|-----------|-----------|
| C  | -0.794432 | 2.426009  | 0.433751  |
| C  | -1.321701 | 1.190203  | 0.224581  |
| C  | -1.295332 | -0.026154 | -0.007747 |
| C  | -1.002265 | -1.305872 | -0.268166 |
| C  | 0.173231  | -1.728921 | -0.407566 |
| C  | 1.498678  | -1.687976 | -0.466505 |
| C  | 2.048366  | -0.570998 | -0.274102 |
| C  | 2.120108  | 0.722721  | -0.029405 |
| C  | 1.486405  | 1.758704  | 0.203481  |
| C  | 0.578610  | 2.780703  | 0.457593  |
| O  | 1.006962  | 3.986721  | 0.712544  |
| Mg | 0.492275  | 5.684546  | 0.123205  |
| Mg | -0.931082 | 7.552887  | -1.153751 |
| C  | -1.711407 | 5.690466  | -0.425023 |
| C  | -1.683446 | 4.577059  | 0.119892  |
| O  | -1.718951 | 3.462396  | 0.757216  |

16

130 c64 scf done: -1006.802264

|    |           |           |           |
|----|-----------|-----------|-----------|
| C  | -0.943245 | -0.000000 | -4.084017 |
| C  | -0.213675 | -0.000000 | -2.972050 |
| C  | 0.421594  | 0.000000  | -0.251936 |
| C  | 0.190532  | 1.254470  | -2.364839 |
| C  | 0.190532  | -1.254470 | -2.364839 |
| Mg | 0.947739  | 3.011800  | -1.792536 |
| Mg | 0.947739  | -3.011800 | -1.792536 |
| C  | 0.527966  | 1.242789  | -1.000384 |
| C  | 0.527966  | -1.242789 | -1.000384 |
| C  | 0.216840  | 0.000000  | 1.064751  |
| C  | 0.055333  | 0.000000  | 2.318615  |
| C  | -0.116162 | 0.000000  | 3.585945  |
| C  | -0.285854 | 0.000000  | 4.850601  |
| C  | -0.456615 | 0.000000  | 6.113890  |
| O  | -0.612008 | -0.000000 | 7.270079  |
| O  | -1.561481 | -0.000000 | -5.056119 |

16

131 c58 scf done: -1006.802528

|    |           |           |           |
|----|-----------|-----------|-----------|
| C  | -0.112506 | 0.018507  | 2.213031  |
| C  | 0.080504  | -0.608124 | -0.308721 |
| C  | 0.017271  | 1.107579  | 1.371440  |
| C  | -0.086272 | -1.372580 | 2.041005  |
| Mg | 0.197325  | 1.802712  | 3.354415  |
| Mg | -0.344481 | -1.007694 | 4.072468  |
| C  | -0.047626 | 0.789218  | -0.047259 |
| C  | 0.135473  | -1.569771 | 0.653834  |
| C  | -0.116870 | 1.740935  | -1.000121 |
| C  | 0.163301  | -1.972973 | -0.712138 |
| C  | -0.127434 | 2.677610  | -1.832006 |
| C  | 0.208825  | -2.907946 | -1.650215 |
| C  | -0.169754 | 3.622341  | -2.707252 |
| C  | 0.201026  | -3.228057 | -2.884757 |
| O  | -0.202552 | 4.472784  | -3.488403 |
| O  | 0.206943  | -3.653443 | -3.974863 |

16

132 c56 scf done: -1006.796707

|    |           |           |           |
|----|-----------|-----------|-----------|
| C  | -0.420462 | 2.611909  | -0.003879 |
| Mg | -2.713244 | 0.748599  | -0.068260 |
| C  | -1.731105 | 2.512639  | -0.027706 |
| Mg | 2.500821  | 3.050458  | 0.063276  |
| C  | 3.922668  | 1.579066  | 0.072748  |
| C  | 3.134724  | 0.594097  | 0.044619  |
| C  | 2.334834  | -0.469864 | 0.015465  |
| C  | 1.144100  | -0.931554 | -0.013975 |
| C  | 0.000694  | -1.500468 | -0.043217 |
| C  | -1.324582 | -1.374452 | -0.067496 |
| C  | -2.583381 | -1.293094 | -0.090798 |
| C  | 0.535595  | 3.513621  | 0.030010  |
| C  | -0.441623 | 4.705752  | 0.037439  |
| O  | -0.186748 | 5.859103  | 0.064913  |
| C  | -1.954573 | 4.037643  | -0.001002 |
| O  | -2.979138 | 4.626001  | -0.006090 |

16

|     |            |           |              |  |  |
|-----|------------|-----------|--------------|--|--|
| 133 | c85        | scf done: | -1006.789876 |  |  |
| C   | -0.173706  | 0.000000  | 1.000000     |  |  |
| C   | 1.054086   | 0.000000  | 1.000000     |  |  |
| C   | -1.522634  | 0.000000  | 1.000000     |  |  |
| Mg  | 3.067396   | 0.000000  | 1.000000     |  |  |
| C   | -2.743731  | 0.000000  | 1.000000     |  |  |
| C   | 5.070197   | 0.000000  | 1.000000     |  |  |
| C   | -4.091654  | 0.000000  | 1.000000     |  |  |
| C   | 6.320696   | 0.000000  | 1.000000     |  |  |
| C   | -5.320114  | 0.000000  | 1.000000     |  |  |
| C   | 7.630392   | 0.000000  | 1.000000     |  |  |
| Mg  | -7.301946  | 0.000000  | 1.000000     |  |  |
| C   | 8.896251   | 0.000000  | 1.000000     |  |  |
| C   | -9.373821  | 0.000000  | 1.000000     |  |  |
| C   | 10.179852  | 0.000000  | 1.000000     |  |  |
| O   | -10.521874 | 0.000000  | 1.000000     |  |  |
| O   | 11.348040  | 0.000000  | 1.000000     |  |  |

16

|     |           |           |              |  |  |
|-----|-----------|-----------|--------------|--|--|
| 134 | c63       | scf done: | -1006.795659 |  |  |
| C   | -0.000000 | 0.000000  | 0.031382     |  |  |
| C   | -0.000000 | 0.000000  | 1.358333     |  |  |
| C   | -0.000000 | -0.000000 | 4.238292     |  |  |
| C   | -1.263750 | 0.000000  | 2.078524     |  |  |
| C   | 1.263750  | 0.000000  | 2.078524     |  |  |
| Mg  | -3.090141 | 0.000000  | 2.828212     |  |  |
| Mg  | 3.090141  | -0.000000 | 2.828212     |  |  |
| C   | -1.245289 | 0.000000  | 3.484142     |  |  |
| C   | 1.245289  | -0.000000 | 3.484142     |  |  |
| C   | 0.000000  | -0.000000 | 5.568799     |  |  |
| C   | 0.000000  | -0.000000 | 6.837059     |  |  |
| C   | 0.000000  | -0.000000 | 8.113768     |  |  |
| C   | 0.000000  | -0.000000 | 9.395416     |  |  |
| C   | 0.000000  | -0.000000 | 10.667435    |  |  |
| O   | 0.000000  | -0.000000 | 11.838922    |  |  |
| O   | -0.000000 | 0.000000  | -1.124954    |  |  |

16

|     |          |           |              |  |  |
|-----|----------|-----------|--------------|--|--|
| 135 | c62      | scf done: | -1006.790896 |  |  |
| O   | 0.000005 | 0.168381  | 0.053433     |  |  |

|    |           |           |           |
|----|-----------|-----------|-----------|
| C  | -0.000010 | 0.162136  | 1.244379  |
| C  | -0.000010 | -0.140569 | 4.388542  |
| C  | -1.175412 | 0.118038  | 2.188505  |
| C  | 1.175384  | 0.118342  | 2.188534  |
| Mg | -3.181621 | -0.143725 | 2.762856  |
| Mg | 3.181654  | -0.142853 | 2.762969  |
| C  | -1.111772 | -0.065339 | 3.486761  |
| C  | 1.111767  | -0.065053 | 3.486790  |
| C  | -0.000037 | -0.114611 | 5.738597  |
| C  | -0.000036 | -0.067843 | 6.984132  |
| C  | -0.000010 | -0.033242 | 8.285588  |
| C  | 0.000024  | 0.000333  | 9.543849  |
| C  | 0.000148  | 0.035306  | 10.832306 |
| C  | 0.000153  | 0.069600  | 12.101972 |
| O  | -0.000226 | 0.101100  | 13.270992 |

16

|                   |              |           |           |
|-------------------|--------------|-----------|-----------|
| 136 c68 scf done: | -1006.792235 |           |           |
| C                 | 0.425680     | -0.000000 | 1.408883  |
| C                 | 0.425680     | 0.000000  | -1.408883 |
| C                 | -0.098564    | -0.000000 | 2.623543  |
| C                 | -0.098564    | 0.000000  | -2.623543 |
| C                 | -0.579325    | -0.000000 | 3.796637  |
| C                 | -0.579325    | 0.000000  | -3.796637 |
| C                 | -1.079939    | -0.000000 | 4.972444  |
| C                 | -1.079939    | 0.000000  | -4.972444 |
| O                 | -1.532527    | -0.000000 | 6.045696  |
| O                 | -1.532527    | 0.000000  | -6.045696 |
| C                 | 0.715415     | 1.242041  | 0.700581  |
| C                 | 0.715415     | 1.242041  | -0.700581 |
| C                 | 0.715415     | -1.242041 | -0.700581 |
| C                 | 0.715415     | -1.242041 | 0.700581  |
| Mg                | 1.331675     | -2.998770 | -0.000000 |
| Mg                | 1.331675     | 2.998770  | 0.000000  |

16

|                   |              |          |          |
|-------------------|--------------|----------|----------|
| 137 c70 scf done: | -1006.782855 |          |          |
| C                 | 0.066798     | 0.000000 | 1.000000 |
| C                 | 1.297881     | 0.000000 | 1.000000 |
| C                 | -1.262829    | 0.000000 | 1.000000 |
| C                 | 2.627508     | 0.000000 | 1.000000 |
| C                 | -2.491976    | 0.000000 | 1.000000 |
| C                 | 3.856655     | 0.000000 | 1.000000 |
| C                 | -3.831472    | 0.000000 | 1.000000 |
| C                 | 5.196151     | 0.000000 | 1.000000 |
| C                 | -5.064484    | 0.000000 | 1.000000 |
| C                 | 6.429163     | 0.000000 | 1.000000 |
| Mg                | -7.043856    | 0.000000 | 1.000000 |
| Mg                | 8.408535     | 0.000000 | 1.000000 |
| C                 | -9.113023    | 0.000000 | 1.000000 |
| C                 | 10.477702    | 0.000000 | 1.000000 |
| O                 | -10.261753   | 0.000000 | 1.000000 |
| O                 | 11.626432    | 0.000000 | 1.000000 |

16

|                   |              |           |           |
|-------------------|--------------|-----------|-----------|
| 138 c66 scf done: | -1006.786303 |           |           |
| C                 | 0.000000     | 0.000000  | 1.453855  |
| C                 | 0.000000     | -0.000000 | -1.453855 |

|    |           |           |           |
|----|-----------|-----------|-----------|
| C  | 0.000000  | 0.000000  | 2.776737  |
| C  | 0.000000  | -0.000000 | -2.776737 |
| C  | 0.000000  | 0.000000  | 4.048088  |
| C  | 0.000000  | -0.000000 | -4.048088 |
| C  | 0.000000  | 0.000000  | 5.324421  |
| C  | 0.000000  | -0.000000 | -5.324421 |
| O  | 0.000000  | 0.000000  | 6.493369  |
| O  | 0.000000  | -0.000000 | -6.493369 |
| C  | 0.000000  | 1.250247  | 0.702062  |
| C  | 0.000000  | 1.250247  | -0.702062 |
| C  | -0.000000 | -1.250247 | -0.702062 |
| C  | -0.000000 | -1.250247 | 0.702062  |
| Mg | 0.000000  | -3.087041 | 0.000000  |
| Mg | 0.000000  | 3.087041  | -0.000000 |

16

139 c84 scf done: -1006.776749

|    |          |          |            |
|----|----------|----------|------------|
| C  | 0.000000 | 0.000000 | 0.628333   |
| C  | 0.000000 | 0.000000 | -0.596156  |
| C  | 0.000000 | 0.000000 | 1.965175   |
| C  | 0.000000 | 0.000000 | -1.941480  |
| C  | 0.000000 | 0.000000 | 3.190056   |
| C  | 0.000000 | 0.000000 | -3.170999  |
| C  | 0.000000 | 0.000000 | 4.534024   |
| Mg | 0.000000 | 0.000000 | -5.177905  |
| C  | 0.000000 | 0.000000 | 5.764354   |
| C  | 0.000000 | 0.000000 | -7.189798  |
| Mg | 0.000000 | 0.000000 | 7.747578   |
| C  | 0.000000 | 0.000000 | -8.451504  |
| C  | 0.000000 | 0.000000 | 9.816033   |
| C  | 0.000000 | 0.000000 | -9.750687  |
| O  | 0.000000 | 0.000000 | 10.964832  |
| O  | 0.000000 | 0.000000 | -10.917354 |

16

140 c67 scf done: -1006.779149

|    |           |           |           |
|----|-----------|-----------|-----------|
| C  | 0.000000  | 0.322282  | -3.649647 |
| C  | 0.000000  | 0.254216  | -2.294407 |
| C  | -0.000000 | 0.096295  | 0.594564  |
| C  | 0.000000  | 1.450698  | -1.479522 |
| C  | 0.000000  | -1.029054 | -1.611585 |
| Mg | 0.000000  | 3.260178  | -0.691654 |
| Mg | -0.000000 | -2.913399 | -1.012822 |
| C  | 0.000000  | 1.383667  | -0.071214 |
| C  | -0.000000 | -1.109749 | -0.206110 |
| C  | -0.000000 | 0.025597  | 1.942996  |
| C  | -0.000000 | -0.036974 | 3.194426  |
| C  | -0.000000 | -0.102191 | 4.489112  |
| C  | -0.000000 | -0.165838 | 5.754884  |
| O  | -0.000000 | -0.224585 | 6.926640  |
| C  | 0.000000  | -0.373511 | -4.731583 |
| O  | 0.000000  | -0.836574 | -5.807939 |

16

141 c65 scf done: -1006.778172

|   |          |           |           |
|---|----------|-----------|-----------|
| C | 0.000000 | 0.000000  | -3.617298 |
| C | 0.000000 | 0.000000  | -2.269782 |
| C | 0.000000 | -0.000000 | 0.621604  |

|    |           |           |           |
|----|-----------|-----------|-----------|
| C  | 0.000000  | 1.244655  | -1.521857 |
| C  | -0.000000 | -1.244655 | -1.521857 |
| Mg | 0.000000  | 3.091544  | -0.823329 |
| Mg | -0.000000 | -3.091544 | -0.823329 |
| C  | 0.000000  | 1.248151  | -0.112677 |
| C  | -0.000000 | -1.248151 | -0.112677 |
| C  | 0.000000  | -0.000000 | 1.971978  |
| C  | 0.000000  | -0.000000 | 3.224950  |
| C  | 0.000000  | -0.000000 | 4.521174  |
| C  | 0.000000  | -0.000000 | 5.788768  |
| O  | 0.000000  | -0.000000 | 6.962105  |
| C  | 0.000000  | 0.000000  | -4.881093 |
| O  | 0.000000  | 0.000000  | -6.060542 |

16

142 c54 scf done: -1006.766677

|    |           |           |           |
|----|-----------|-----------|-----------|
| C  | -0.000000 | -0.000000 | 1.851273  |
| C  | -0.000000 | 0.000000  | -0.874884 |
| C  | 0.361211  | 1.209223  | 1.331453  |
| C  | -0.361211 | -1.209223 | 1.331453  |
| Mg | 0.681546  | 1.290834  | 3.423209  |
| Mg | -0.681546 | -1.290834 | 3.423209  |
| C  | 0.063801  | 1.199488  | -0.100771 |
| C  | -0.063801 | -1.199488 | -0.100771 |
| C  | 0.000217  | 2.312507  | -0.861700 |
| C  | -0.000217 | -2.312507 | -0.861700 |
| C  | -0.048938 | 3.366590  | -1.541234 |
| C  | 0.048938  | -3.366590 | -1.541234 |
| C  | -0.107890 | 4.421996  | -2.271157 |
| C  | 0.107890  | -4.421996 | -2.271157 |
| O  | -0.160967 | 5.373621  | -2.922863 |
| O  | 0.160967  | -5.373621 | -2.922863 |

16

143 c6 scf done: -1006.765560

|    |           |           |           |
|----|-----------|-----------|-----------|
| C  | 1.392105  | -1.771411 | 0.119596  |
| C  | 0.270218  | -1.283954 | 0.078728  |
| C  | -1.010007 | -0.697240 | 0.030529  |
| Mg | -2.952345 | -1.491749 | 0.056671  |
| O  | -4.200381 | -0.278919 | -0.800302 |
| O  | -4.217026 | -0.187923 | 0.737444  |
| Mg | -3.142908 | 1.190803  | -0.104190 |
| C  | -1.107994 | 0.679023  | -0.052002 |
| C  | 0.076311  | 1.442040  | -0.084804 |
| C  | 1.118066  | 2.083768  | -0.112133 |
| C  | 2.458431  | 2.289481  | -0.110578 |
| C  | 3.652518  | 2.022703  | -0.082133 |
| C  | 4.555025  | 1.004664  | -0.012273 |
| C  | 4.640568  | -0.214376 | 0.061278  |
| C  | 3.892726  | -1.351316 | 0.120977  |
| C  | 2.747884  | -1.783942 | 0.134744  |

16

144 c52 scf done: -1006.759914

|   |           |           |          |
|---|-----------|-----------|----------|
| C | -0.000000 | 0.000000  | 0.944807 |
| C | -0.000000 | 0.000000  | 3.808541 |
| C | -1.255680 | -0.000000 | 1.541826 |
| C | 1.255680  | 0.000000  | 1.541826 |

|    |           |           |           |
|----|-----------|-----------|-----------|
| Mg | -1.447807 | -0.000000 | -0.593611 |
| Mg | 1.447807  | 0.000000  | -0.593611 |
| C  | -1.184491 | -0.000000 | 2.983889  |
| C  | 1.184491  | 0.000000  | 2.983889  |
| C  | -2.364348 | -0.000000 | 3.651518  |
| C  | 2.364348  | 0.000000  | 3.651518  |
| C  | -3.485622 | -0.000000 | 4.208466  |
| C  | 3.485622  | 0.000000  | 4.208466  |
| C  | -4.616945 | -0.000000 | 4.821143  |
| C  | 4.616945  | 0.000000  | 4.821143  |
| O  | -5.631727 | -0.000000 | 5.367485  |
| O  | 5.631727  | 0.000000  | 5.367485  |

16

145 c16 scf done: -1006.747521

|    |           |           |           |
|----|-----------|-----------|-----------|
| C  | -0.786262 | 2.512151  | -0.409928 |
| C  | -1.458381 | 1.337472  | -0.217338 |
| C  | -1.372317 | 0.117073  | 0.006989  |
| C  | -1.062719 | -1.157236 | 0.226906  |
| C  | 0.105520  | -1.625213 | 0.316640  |
| C  | 1.423912  | -1.707473 | 0.333474  |
| C  | 2.009273  | -0.589368 | 0.150732  |
| C  | 2.223248  | 0.677698  | -0.066490 |
| C  | 1.473789  | 1.680745  | -0.236706 |
| C  | 0.611452  | 2.679010  | -0.378149 |
| Mg | 1.172510  | 4.698069  | -0.192222 |
| C  | 1.016210  | 6.628721  | 0.393846  |
| C  | -0.202770 | 6.389306  | 0.514365  |
| Mg | -1.960797 | 5.405334  | 0.351715  |
| O  | -2.786342 | 3.782226  | -0.080277 |
| O  | -1.460307 | 3.683979  | -0.713556 |

16

146 c80 scf done: -1006.734059

|    |            |           |           |
|----|------------|-----------|-----------|
| C  | 1.148145   | 5.871990  | 0.052402  |
| C  | 1.869566   | 4.818054  | 0.050640  |
| C  | 2.573747   | 3.707917  | 0.048481  |
| C  | 3.317824   | 2.693672  | 0.048520  |
| C  | 3.720697   | 1.404348  | 0.034323  |
| C  | 4.818108   | 0.697601  | 0.050287  |
| O  | 5.691741   | -0.055412 | 0.059311  |
| Mg | 1.589568   | 1.252118  | -0.007518 |
| C  | -0.284791  | 0.588222  | -0.037679 |
| C  | -1.451849  | 0.219182  | -0.054484 |
| C  | -2.752777  | -0.176023 | -0.071801 |
| C  | -3.926847  | -0.523917 | -0.086970 |
| Mg | -5.866061  | -1.043645 | -0.109663 |
| C  | -7.788745  | -1.572013 | -0.130538 |
| C  | -9.028635  | -1.912400 | -0.143166 |
| O  | -10.163139 | -2.223641 | -0.154929 |

16

147 c5 scf done: -1006.739512

|   |          |           |           |
|---|----------|-----------|-----------|
| C | 1.471992 | -1.793195 | -0.004246 |
| C | 2.808277 | -1.673418 | -0.003502 |
| C | 3.976191 | -1.269730 | -0.002005 |
| C | 4.522358 | -0.037189 | 0.000735  |
| C | 4.562583 | 1.198237  | 0.003414  |

|    |           |           |           |
|----|-----------|-----------|-----------|
| C  | 3.465830  | 2.012792  | 0.004562  |
| C  | 2.295200  | 2.367176  | 0.004776  |
| C  | 0.990269  | 1.972915  | 0.003179  |
| C  | -0.074649 | 1.389558  | 0.001329  |
| C  | -1.152534 | 0.455462  | -0.001133 |
| O  | -2.341402 | 1.110835  | -0.000670 |
| O  | -3.448857 | 0.203169  | -0.003110 |
| Mg | -5.333461 | -0.328481 | -0.009154 |
| Mg | -2.899632 | -1.686494 | -0.005494 |
| C  | -0.987009 | -0.898602 | -0.003378 |
| C  | 0.318036  | -1.371373 | -0.003753 |

16

148 c75 scf done: -1006.733468

|    |           |           |           |
|----|-----------|-----------|-----------|
| C  | 0.266143  | -1.636172 | 0.021709  |
| C  | -1.064083 | -1.380873 | 0.015727  |
| C  | -2.195855 | -0.967704 | 0.005419  |
| O  | -3.358590 | -0.364317 | -0.006398 |
| C  | -3.211214 | 0.954407  | -0.027949 |
| C  | -3.045323 | 2.159877  | -0.047843 |
| Mg | -1.579229 | 3.530759  | -0.068707 |
| C  | 0.271704  | 4.313053  | -0.079819 |
| C  | 1.503009  | 4.315601  | -0.080440 |
| Mg | 3.349348  | 3.523108  | -0.064550 |
| C  | 4.808496  | 2.144940  | -0.039473 |
| C  | 4.969454  | 0.938877  | -0.015635 |
| O  | 5.111454  | -0.380471 | 0.007273  |
| C  | 1.481518  | -1.638462 | 0.023686  |
| C  | 2.812720  | -1.388226 | 0.021195  |
| C  | 3.946026  | -0.979118 | 0.015781  |

16

149 c57 scf done: -1006.729833

|    |           |           |           |
|----|-----------|-----------|-----------|
| C  | -0.000000 | 0.000000  | 1.515259  |
| C  | 0.000000  | -0.000000 | 3.911074  |
| C  | -1.287270 | 0.000000  | 1.710249  |
| C  | 1.287270  | 0.000000  | 1.710249  |
| Mg | -1.466096 | 0.000000  | -0.403131 |
| Mg | 1.466096  | 0.000000  | -0.403131 |
| C  | -1.377038 | 0.000000  | 3.194065  |
| C  | 1.377038  | -0.000000 | 3.194065  |
| O  | -2.402447 | 0.000000  | 3.831200  |
| O  | 2.402447  | -0.000000 | 3.831200  |
| C  | 0.000000  | -0.000000 | 5.231293  |
| C  | 0.000000  | -0.000000 | 6.490367  |
| C  | 0.000000  | -0.000000 | 7.778123  |
| C  | 0.000000  | -0.000000 | 9.038903  |
| C  | 0.000000  | -0.000000 | 10.335282 |
| C  | 0.000000  | -0.000000 | 11.614283 |

16

150 c11 scf done: -1006.725950

|   |           |           |           |
|---|-----------|-----------|-----------|
| C | -0.556174 | 2.399438  | 0.141711  |
| C | -1.280757 | 1.231892  | 0.008513  |
| C | -1.309758 | -0.005343 | -0.096863 |
| C | -1.101887 | -1.316989 | -0.199285 |
| C | 0.032186  | -1.874326 | -0.198645 |
| C | 1.337319  | -2.060835 | -0.155150 |



|    |           |           |           |
|----|-----------|-----------|-----------|
| C  | 1.999122  | -0.969828 | -0.036994 |
| C  | 2.323422  | 0.279903  | 0.085836  |
| C  | 1.656720  | 1.360553  | 0.144938  |
| C  | 0.873444  | 2.413495  | 0.206198  |
| Mg | 1.139372  | 4.524043  | 0.236381  |
| Mg | 0.166006  | 7.048295  | -0.359096 |
| O  | -1.702689 | 6.880743  | -0.761436 |
| O  | -1.909938 | 6.062731  | 0.474416  |
| C  | -1.544860 | 4.848362  | 0.290388  |
| C  | -1.175513 | 3.690356  | 0.219087  |

16

151 c31 scf done: -1006.711524

|    |           |           |           |
|----|-----------|-----------|-----------|
| C  | -1.020867 | 3.061089  | 0.001025  |
| C  | -1.717928 | 1.875306  | 0.002924  |
| Mg | -0.286130 | 0.331657  | 0.000697  |
| O  | -0.240843 | -1.789785 | 0.001872  |
| C  | 0.627098  | -2.579518 | 0.001021  |
| C  | 1.571162  | -3.438164 | -0.000106 |
| C  | 2.492862  | -4.328007 | -0.001179 |
| C  | 1.752459  | 0.980509  | -0.003093 |
| C  | 1.270088  | 2.123353  | -0.002529 |
| C  | 0.446213  | 3.277311  | -0.001455 |
| O  | 0.966960  | 4.440816  | -0.002472 |
| Mg | 0.058770  | 6.115259  | -0.001549 |
| C  | -1.187941 | 7.831681  | -0.000163 |
| C  | -1.940399 | 6.834028  | 0.001298  |
| C  | -2.133414 | 5.463478  | 0.002001  |
| C  | -1.712072 | 4.313482  | 0.001707  |

16

152 c76 scf done: -1006.707712

|    |           |           |           |
|----|-----------|-----------|-----------|
| C  | -3.501321 | -1.944166 | -0.013309 |
| Mg | -1.251611 | -1.923773 | -0.005926 |
| C  | 0.765706  | -2.123208 | 0.000856  |
| C  | 1.994925  | -2.052914 | 0.004307  |
| Mg | 3.951409  | -1.569903 | 0.009036  |
| C  | 6.057472  | -1.001900 | 0.010568  |
| O  | 7.205962  | -1.327054 | 0.012621  |
| C  | 5.415681  | 0.309777  | 0.007542  |
| C  | 4.317054  | 0.903551  | 0.005211  |
| C  | 3.094791  | 1.437343  | 0.002289  |
| C  | 1.903281  | 1.732990  | -0.000674 |
| C  | 0.570167  | 1.694847  | -0.003441 |
| C  | -0.625981 | 1.441767  | -0.006067 |
| C  | -1.846075 | 0.872453  | -0.008719 |
| C  | -2.855382 | 0.192914  | -0.011422 |
| O  | -3.879122 | -0.620501 | -0.014243 |

16

153 c17 scf done: -1006.700389

|   |           |           |           |
|---|-----------|-----------|-----------|
| C | -0.389142 | 2.389886  | 0.136804  |
| C | -0.939508 | 1.181215  | 0.194860  |
| C | -1.360387 | -0.012522 | 0.238687  |
| C | -0.814773 | -1.190191 | 0.154818  |
| C | 0.013838  | -2.157063 | 0.038597  |
| C | 1.267407  | -1.771792 | -0.121721 |
| C | 2.281942  | -1.030165 | -0.244943 |

|    |           |          |           |
|----|-----------|----------|-----------|
| C  | 2.223766  | 0.307275 | -0.224286 |
| C  | 1.849588  | 1.489166 | -0.162910 |
| C  | 1.030079  | 2.571975 | -0.044957 |
| Mg | 1.403897  | 4.599418 | -0.005532 |
| O  | -0.136266 | 5.549930 | 0.562728  |
| O  | -0.788701 | 6.720129 | -0.044059 |
| C  | -1.985498 | 6.243348 | -0.292423 |
| C  | -3.005875 | 5.545818 | -0.414667 |
| Mg | -1.704349 | 4.076066 | 0.229001  |

16

|     |           |           |              |  |
|-----|-----------|-----------|--------------|--|
| 154 | c9        | scf done: | -1006.695426 |  |
| C   | -0.432500 | -0.101704 | 2.548529     |  |
| C   | -0.551534 | -1.340471 | 1.909916     |  |
| C   | -0.125919 | -1.568380 | 0.627564     |  |
| C   | 0.307001  | -1.629986 | -0.546439    |  |
| C   | 0.869225  | -0.987401 | -1.518248    |  |
| C   | 1.397388  | 0.020563  | -2.121918    |  |
| C   | 1.387685  | 1.033589  | -1.321607    |  |
| C   | 1.157376  | 1.681038  | -0.226726    |  |
| C   | 0.650587  | 1.423944  | 0.895851     |  |
| C   | 0.096153  | 1.120839  | 2.108029     |  |
| O   | -1.093510 | -2.414719 | 2.499316     |  |
| O   | -1.548865 | -2.238229 | 3.820302     |  |
| Mg  | -1.301564 | -0.479133 | 4.522693     |  |
| Mg  | -0.895374 | 2.120739  | 5.455115     |  |
| C   | 0.009792  | 3.125548  | 3.866888     |  |
| C   | 0.074058  | 2.232396  | 3.016045     |  |

16

|     |           |           |              |  |
|-----|-----------|-----------|--------------|--|
| 155 | c53       | scf done: | -1006.681623 |  |
| C   | -2.108877 | -1.486245 | -0.216445    |  |
| C   | 6.509102  | -0.194963 | -0.113901    |  |
| C   | -4.067774 | 0.126149  | 0.083955     |  |
| C   | 5.272351  | 0.087874  | -0.049361    |  |
| C   | -3.225183 | -0.952787 | -0.110700    |  |
| C   | 2.044832  | 1.332153  | 0.205741     |  |
| C   | -6.632677 | 0.544999  | 0.189923     |  |
| O   | 3.372897  | 1.406065  | 0.200282     |  |
| C   | -5.381561 | 0.281852  | 0.128240     |  |
| C   | 0.841634  | 1.488350  | 0.248612     |  |
| Mg  | -2.123167 | 0.964198  | 0.199869     |  |
| C   | 3.942571  | 0.158016  | -0.019628    |  |
| C   | -0.822825 | -1.875788 | -0.300135    |  |
| O   | -0.407440 | 1.600284  | 0.284631     |  |
| C   | 0.398633  | -2.033512 | -0.343564    |  |
| Mg  | 2.162983  | -0.999379 | -0.191947    |  |

16

|     |           |           |              |  |
|-----|-----------|-----------|--------------|--|
| 156 | c55       | scf done: | -1006.673615 |  |
| C   | 0.016366  | 0.777971  | 1.665060     |  |
| C   | -0.009071 | -0.379523 | 4.060080     |  |
| C   | -1.137523 | 0.158955  | 2.116105     |  |
| C   | 1.141524  | 0.107794  | 2.115619     |  |
| Mg  | -1.360793 | 0.207841  | -0.031386    |  |
| Mg  | 1.365833  | 0.146638  | -0.032001    |  |
| O   | -1.151262 | -0.436636 | 3.333851     |  |
| O   | 1.129095  | -0.487779 | 3.333359     |  |

|   |           |           |           |
|---|-----------|-----------|-----------|
| C | -0.006599 | -0.284107 | 5.381010  |
| C | -0.004685 | -0.212090 | 6.631857  |
| C | -0.002584 | -0.132306 | 7.921593  |
| C | -0.000454 | -0.054473 | 9.177064  |
| C | 0.001784  | 0.025205  | 10.464726 |
| C | 0.003906  | 0.105168  | 11.719490 |
| C | 0.006094  | 0.187810  | 13.016277 |
| C | 0.008371  | 0.269532  | 14.287759 |

16

157 c69 scf done: -1006.653705

|    |           |           |            |
|----|-----------|-----------|------------|
| C  | -0.000000 | 0.027746  | 1.902974   |
| Mg | -0.000000 | 0.017284  | 3.888527   |
| O  | -0.000000 | 0.002117  | 5.703215   |
| C  | 0.000000  | -0.014520 | 6.945099   |
| C  | -0.000000 | 0.029045  | 0.679764   |
| C  | -0.000000 | 0.029045  | -0.679764  |
| C  | -0.000000 | 0.027746  | -1.902974  |
| Mg | -0.000000 | 0.017284  | -3.888527  |
| O  | -0.000000 | 0.002117  | -5.703215  |
| C  | 0.000000  | -0.014520 | -6.945099  |
| C  | 0.000000  | -0.031364 | 8.177440   |
| C  | 0.000000  | -0.049813 | 9.503837   |
| C  | 0.000000  | -0.068004 | 10.782291  |
| C  | 0.000000  | -0.031364 | -8.177440  |
| C  | 0.000000  | -0.049813 | -9.503837  |
| C  | 0.000000  | -0.068004 | -10.782291 |

16

158 c81 scf done: -1006.663171

|    |           |           |           |
|----|-----------|-----------|-----------|
| C  | -1.488307 | 2.601523  | 0.000000  |
| C  | -0.202606 | 2.158762  | 0.000000  |
| C  | -0.045301 | 0.737311  | 0.000000  |
| C  | -1.273640 | -0.140448 | 0.000000  |
| C  | -2.559263 | 0.302972  | -0.000000 |
| C  | -2.716554 | 1.724304  | -0.000000 |
| C  | -1.888750 | 4.101191  | -0.000000 |
| C  | -3.217380 | 3.933032  | -0.000000 |
| C  | -3.697203 | 2.666967  | -0.000000 |
| C  | 0.935480  | -0.205590 | 0.000000  |
| C  | 0.455848  | -1.471517 | 0.000000  |
| C  | -0.873657 | -1.638709 | 0.000000  |
| Mg | -2.890371 | -1.715137 | -0.000000 |
| Mg | 0.128987  | 4.177740  | 0.000000  |
| O  | 1.873542  | -1.271629 | 0.000000  |
| O  | -4.636202 | 3.731375  | -0.000000 |

16

159 c88 scf done: -1006.629674

|   |           |           |           |
|---|-----------|-----------|-----------|
| C | -1.517462 | -1.940921 | -0.000000 |
| C | -2.409099 | -0.855214 | -0.000000 |
| C | -3.850527 | -1.040253 | 0.000000  |
| C | -4.371235 | -2.348021 | -0.000000 |
| C | -3.451979 | -3.452600 | -0.000000 |
| C | -2.098069 | -3.262595 | -0.000000 |
| C | -2.199725 | 0.519526  | -0.000000 |
| C | -2.863814 | 1.564980  | 0.000000  |
| C | -4.251412 | 1.408799  | 0.000000  |

|    |           |           |           |
|----|-----------|-----------|-----------|
| C  | -4.704977 | 0.106872  | 0.000000  |
| O  | -5.147621 | 2.433471  | 0.000000  |
| C  | -6.468695 | 2.298553  | 0.000000  |
| C  | -6.983058 | 0.847957  | 0.000000  |
| O  | -6.057614 | -0.095408 | 0.000000  |
| Mg | -5.384726 | -4.042661 | 0.000000  |
| Mg | -0.087546 | -3.312081 | -0.000000 |

16

160 c48 scf done: -1006.612045

|    |           |           |           |
|----|-----------|-----------|-----------|
| O  | -4.178894 | 2.081699  | 0.001042  |
| C  | -3.332578 | 1.073840  | -0.000932 |
| C  | -2.415846 | 0.291308  | -0.002578 |
| C  | -1.268840 | -0.426873 | -0.004243 |
| C  | -0.132429 | -0.863199 | -0.005377 |
| C  | 1.201424  | -1.107205 | -0.006085 |
| C  | 2.431696  | -1.190989 | -0.006414 |
| Mg | 3.593566  | 0.450240  | -0.003892 |
| C  | 4.073070  | 2.383770  | -0.000767 |
| O  | 3.503079  | 3.469446  | 0.001177  |
| C  | 3.001841  | 4.586234  | 0.003240  |
| Mg | 1.247573  | 5.517014  | 0.005375  |
| C  | -0.746281 | 5.780935  | 0.006465  |
| C  | -1.752474 | 5.079568  | 0.005582  |
| C  | -2.756938 | 4.157993  | 0.004405  |
| C  | -3.521950 | 3.228716  | 0.003002  |

16

161 c25 scf done: -1006.607174

|    |          |           |          |
|----|----------|-----------|----------|
| C  | 3.071182 | -0.163364 | 1.000000 |
| C  | 1.833391 | 0.401205  | 1.000000 |
| C  | 0.584933 | -0.167762 | 1.000000 |
| C  | 0.849906 | 1.274687  | 1.000000 |
| C  | 2.963072 | -1.554626 | 1.000000 |
| O  | 0.975665 | 2.567397  | 1.000000 |
| C  | 2.405920 | 2.873265  | 1.000000 |
| C  | 2.701579 | 4.228779  | 1.000000 |
| C  | 4.134925 | 4.366012  | 1.000000 |
| Mg | 6.187520 | 4.254861  | 1.000000 |
| C  | 4.676446 | 3.033046  | 1.000000 |
| C  | 3.642599 | 2.100576  | 1.000000 |
| Mg | 3.108176 | 6.129407  | 1.000000 |
| O  | 4.071152 | 0.751806  | 1.000000 |
| C  | 0.380079 | -1.584939 | 1.000000 |
| C  | 1.678934 | -1.843673 | 1.000000 |

16

162 c87 scf done: -1006.565175

|   |           |           |           |
|---|-----------|-----------|-----------|
| C | -4.624903 | 3.898474  | 0.000000  |
| C | -3.257179 | 4.115979  | 0.000000  |
| C | -2.368312 | 3.014495  | 0.000000  |
| C | -2.752510 | 1.656999  | 0.000000  |
| C | -4.340702 | 1.404329  | 0.000000  |
| C | -5.127621 | 2.575689  | 0.000000  |
| C | -4.730413 | 0.110585  | -0.000000 |
| C | -3.875192 | -0.909616 | -0.000000 |
| C | -2.477345 | -0.687340 | -0.000000 |
| C | -1.980494 | 0.547899  | -0.000000 |

|    |           |           |           |
|----|-----------|-----------|-----------|
| O  | -4.291342 | -2.284961 | -0.000000 |
| C  | -3.589432 | -3.340059 | -0.000000 |
| C  | -1.994624 | -3.086226 | -0.000000 |
| O  | -1.655478 | -1.864844 | -0.000000 |
| Mg | -1.344999 | 4.725585  | 0.000000  |
| Mg | -6.632090 | 3.883235  | 0.000000  |

16

163 c24 scf done: -1006.542967

|    |           |           |           |
|----|-----------|-----------|-----------|
| C  | 0.000000  | -0.000000 | -2.823190 |
| C  | 0.000000  | -0.000000 | 2.446865  |
| C  | 0.008151  | 1.449044  | -3.135217 |
| C  | -0.008151 | -1.449044 | -3.135217 |
| C  | 0.006264  | 1.083877  | -1.837991 |
| C  | -0.006264 | -1.083877 | -1.837991 |
| C  | 0.004024  | 0.694368  | -0.484618 |
| C  | -0.004024 | -0.694368 | -0.484618 |
| Mg | -0.000000 | -0.000000 | -6.800452 |
| C  | 0.008160  | 1.414575  | 3.067906  |
| C  | -0.008160 | -1.414575 | 3.067906  |
| C  | 0.007138  | 1.236498  | 1.758285  |
| C  | -0.007138 | -1.236498 | 1.758285  |
| Mg | 0.000000  | -0.000000 | 6.665610  |
| O  | 0.009396  | 1.625595  | 0.498156  |
| O  | -0.009396 | -1.625595 | 0.498156  |

16

164 c23 scf done: -1006.497508

|    |           |           |          |
|----|-----------|-----------|----------|
| C  | 3.265510  | 0.000000  | 1.000000 |
| C  | -1.861397 | -0.000000 | 1.000000 |
| C  | 3.733537  | 1.372862  | 1.000000 |
| C  | 3.733537  | -1.372862 | 1.000000 |
| C  | 2.354648  | 1.165604  | 1.000000 |
| C  | 2.354648  | -1.165604 | 1.000000 |
| C  | 1.071887  | 0.763490  | 1.000000 |
| C  | 1.071887  | -0.763490 | 1.000000 |
| Mg | 5.366314  | 0.000000  | 1.000000 |
| C  | -2.520705 | 1.367191  | 1.000000 |
| C  | -2.520705 | -1.367191 | 1.000000 |
| C  | -1.201524 | 1.267576  | 1.000000 |
| C  | -1.201524 | -1.267576 | 1.000000 |
| Mg | -4.804723 | -0.000000 | 1.000000 |
| O  | 0.012498  | 1.683759  | 1.000000 |
| O  | 0.012498  | -1.683759 | 1.000000 |

Optimized geometries of C12O2Mg2 (triplets) obtained at the UPBE0-D3/def2-TZVP level

16  
t21 scf done: -1006.883654  
C -1.822680 1.176698 0.003082  
O 6.475989 0.147372 -0.013938  
C -4.047257 0.209338 -0.001864  
C 5.327187 -0.020263 -0.008637  
C -3.172143 1.275333 -0.000582  
C 1.884664 -1.477371 0.004366  
O -6.451650 -0.302264 -0.010350  
C 3.025836 -1.012147 0.000573  
C -5.343508 0.024179 -0.006491  
C 0.601275 -1.922091 0.007118  
Mg -2.218245 -0.960562 0.004844  
C 4.036113 -0.070409 -0.002641  
C -0.636298 1.788832 0.003734  
C -0.603190 -2.179273 0.009629  
C 0.565381 2.146901 0.004668  
Mg 2.293999 1.093842 0.008659

16  
c79 scf done: -1006.898275  
C -3.051459 0.564981 -0.055571  
Mg -1.405540 1.910086 -0.025376  
C 0.087907 3.245484 0.002740  
C 1.309298 3.412417 0.020337  
Mg 3.104918 2.523699 0.040511  
C 5.051219 1.668511 0.062736  
C 4.286085 0.535422 0.045889  
C 3.043260 0.171775 0.026614  
C 1.833973 -0.272276 0.007407  
C 0.568124 -0.444924 -0.011030  
C -0.715910 -0.340047 -0.028230  
C -2.010598 -0.321635 -0.046060  
C -4.354772 0.580449 -0.073551  
O -5.497480 0.767201 -0.088395  
C 6.302714 2.032626 0.082101  
O 7.353564 2.518733 0.099324

16  
t3 scf done: -1006.889563  
O -5.410735 -1.964823 -0.028408  
O 5.390885 -2.140246 0.110376  
C -4.293522 -1.663667 -0.019056  
C 4.339465 -1.660850 0.089528  
C -3.090607 -1.160147 -0.011907  
Mg -2.155746 0.807195 -0.031272  
C 1.750078 2.822902 -0.015048  
C -1.786259 -1.570836 0.011135  
C 3.236916 -0.967195 0.064597  
C -2.073175 2.838045 -0.062254  
Mg 2.550734 1.004246 0.024274  
C -0.667738 -0.785238 0.012652  
C 1.889367 -1.189692 0.051261  
C -0.841687 2.970566 -0.049112

|     |                        |           |           |
|-----|------------------------|-----------|-----------|
| C   | 0.526813               | 2.964190  | -0.032264 |
| C   | 0.649814               | -1.032676 | 0.033153  |
| 16  |                        |           |           |
| t7  | scf done: -1006.890796 |           |           |
| O   | 6.884004               | 0.434098  | 0.009803  |
| O   | -6.447721              | -0.309365 | 0.007338  |
| C   | 5.759496               | 0.106746  | 0.008283  |
| C   | -5.302739              | -0.483914 | 0.006239  |
| C   | -4.001386              | -0.497247 | 0.005892  |
| C   | 4.568110               | -0.349978 | 0.006029  |
| Mg  | -2.331114              | 0.798951  | 0.011543  |
| C   | 2.145082               | -1.144522 | 0.002175  |
| C   | -2.951738              | -1.374733 | 0.001759  |
| C   | 0.874430               | -1.355853 | 0.001339  |
| C   | -0.670194              | 1.964074  | 0.015873  |
| C   | 3.258633               | -0.432881 | 0.005536  |
| C   | 0.378407               | 2.636003  | 0.018456  |
| C   | -0.386733              | -1.605993 | 0.000320  |
| C   | -1.673912              | -1.471965 | 0.001074  |
| Mg  | 1.556908               | 1.015206  | 0.011771  |
| 16  |                        |           |           |
| t2  | scf done: -1006.880576 |           |           |
| C   | 3.655132               | -0.760710 | -0.002485 |
| C   | 1.281689               | 2.575761  | 0.000546  |
| C   | 1.197490               | -1.566091 | -0.001043 |
| O   | -5.112740              | -0.414643 | -0.002148 |
| C   | -4.700744              | 0.763774  | 0.001352  |
| C   | -1.359299              | -1.946074 | 0.001257  |
| Mg  | -3.162386              | -1.039135 | 0.006279  |
| C   | 2.410585               | -1.360806 | -0.002176 |
| Mg  | 2.443850               | 0.925327  | -0.000531 |
| C   | -1.292345              | 2.588539  | 0.006373  |
| C   | 0.036343               | 2.638778  | 0.004022  |
| C   | 4.898983               | -1.113951 | -0.004193 |
| C   | -3.355783              | 1.103938  | 0.009946  |
| O   | 6.042714               | -1.310121 | -0.005390 |
| C   | -2.403205              | 1.996749  | 0.008372  |
| C   | -0.137757              | -1.809452 | 0.000100  |
| 16  |                        |           |           |
| c77 | scf done: -1006.877117 |           |           |
| O   | -3.740700              | -1.647843 | -0.134818 |
| C   | -3.911244              | -0.405954 | -0.109709 |
| C   | -3.544509              | 0.790240  | -0.104714 |
| C   | -3.184648              | 2.069864  | -0.098953 |
| C   | -2.274573              | 2.944175  | -0.118237 |
| C   | -1.277753              | 3.763255  | -0.143428 |
| C   | -0.038027              | 4.088226  | -0.183657 |
| C   | 1.238013               | 4.203696  | -0.229622 |
| C   | 2.538397               | 4.393566  | -0.275535 |
| C   | 3.617896               | 3.549500  | -0.327094 |
| C   | 4.921107               | 3.606391  | -0.374296 |
| O   | 6.071010               | 3.479923  | -0.418216 |
| Mg  | 2.059309               | 2.081798  | -0.290882 |
| C   | 1.007751               | 0.351584  | -0.278748 |
| C   | 0.084904               | -0.462674 | -0.255482 |

Mg -1.838835 -0.975652 -0.193203

16

c26 scf done: -1006.887976

|    |           |           |           |
|----|-----------|-----------|-----------|
| C  | 0.602831  | 0.768471  | -0.004108 |
| C  | -0.481544 | 1.600534  | -0.003641 |
| C  | -1.778234 | 1.516188  | -0.002411 |
| C  | -3.066294 | 1.524679  | 0.000308  |
| C  | -4.299244 | 1.085906  | 0.002955  |
| C  | -4.622328 | -0.245211 | 0.004433  |
| C  | -4.527130 | -1.503633 | 0.004622  |
| Mg | -2.495813 | -0.794148 | 0.000255  |
| O  | -0.652837 | -1.270333 | -0.003265 |
| C  | 0.474269  | -0.717722 | -0.004122 |
| O  | 1.531588  | -1.442673 | -0.004561 |
| Mg | 3.357461  | -1.025306 | 0.000643  |
| C  | 5.264229  | -0.121759 | 0.007274  |
| C  | 4.442785  | 0.820517  | 0.004494  |
| C  | 3.157484  | 1.315094  | 0.000729  |
| C  | 1.938209  | 1.213184  | -0.001896 |

16

t63 scf done: -1006.877275

|    |           |           |           |
|----|-----------|-----------|-----------|
| O  | -5.892577 | -1.099539 | -0.291694 |
| C  | 2.975806  | 3.207051  | 1.160358  |
| C  | -4.732754 | -1.072064 | -0.338257 |
| C  | 2.250882  | 2.025879  | 0.675944  |
| C  | -3.451349 | -0.926316 | -0.338734 |
| O  | 2.532374  | 4.198992  | 1.620436  |
| C  | -2.314878 | -1.619157 | -0.701976 |
| C  | 2.884376  | 0.912133  | 0.152201  |
| C  | -1.112368 | -1.878576 | -0.877288 |
| C  | 3.125254  | -0.181655 | -0.342830 |
| Mg | 0.782819  | -2.459171 | -1.229480 |
| C  | 3.033045  | -1.418616 | -0.884196 |
| Mg | -1.805643 | 0.322181  | 0.129155  |
| C  | 0.858894  | 1.901355  | 0.691545  |
| C  | -0.336303 | 1.617168  | 0.626710  |
| C  | 2.799007  | -2.541816 | -1.368129 |

16

c82 scf done: -1006.879589

|    |           |           |           |
|----|-----------|-----------|-----------|
| C  | -1.091551 | -2.650525 | -0.443176 |
| O  | 5.348989  | -1.129976 | -0.262236 |
| C  | -3.654934 | 0.278243  | 0.104868  |
| C  | 4.679248  | -0.174350 | -0.085703 |
| Mg | -2.722162 | -1.483141 | -0.216537 |
| C  | 1.593540  | 1.886255  | 0.316268  |
| O  | -6.115340 | 0.416232  | 0.162176  |
| C  | 2.516317  | 1.093767  | 0.165195  |
| C  | -4.946066 | 0.350687  | 0.134946  |
| C  | 0.406018  | 2.511881  | 0.441878  |
| Mg | -2.518426 | 1.923371  | 0.378034  |
| C  | 3.215617  | -0.084702 | -0.050555 |
| C  | 0.109580  | -2.368726 | -0.409926 |
| C  | -0.760642 | 2.906039  | 0.526683  |
| C  | 1.359066  | -1.864962 | -0.338130 |
| C  | 2.356246  | -1.162833 | -0.228211 |



16  
t4 scf done: -1006.888186

|    |           |           |           |
|----|-----------|-----------|-----------|
| O  | 3.002041  | 1.334915  | -0.019716 |
| O  | -4.490413 | -1.512837 | 0.006325  |
| C  | 0.664710  | 1.502395  | -0.014135 |
| C  | -3.260971 | -1.775372 | 0.003885  |
| C  | 1.886760  | 0.775887  | -0.015306 |
| C  | -0.693511 | -1.548307 | -0.003093 |
| C  | -0.481029 | 1.902742  | -0.012372 |
| C  | -2.032107 | -1.687681 | 0.000488  |
| Mg | 4.860902  | 0.375980  | -0.021130 |
| C  | 0.490840  | -1.244271 | -0.006525 |
| C  | 1.756299  | -0.684383 | -0.010754 |
| C  | 4.171377  | -1.695274 | -0.012879 |
| C  | -1.825322 | 2.098265  | -0.009558 |
| C  | 2.969688  | -1.356647 | -0.011364 |
| C  | -3.059436 | 2.180636  | -0.006710 |
| Mg | -3.795598 | 0.325798  | -0.000195 |

16  
c73 scf done: -1006.873802

|    |           |           |           |
|----|-----------|-----------|-----------|
| C  | -1.118622 | 2.094659  | -0.004570 |
| C  | -2.280115 | 1.653550  | -0.004681 |
| C  | -3.339817 | 0.843267  | -0.004115 |
| C  | -4.328788 | 0.091672  | -0.004021 |
| Mg | -3.140488 | -1.701254 | 0.002892  |
| C  | -1.351721 | -2.565450 | 0.004250  |
| C  | -0.128635 | -2.474053 | 0.004903  |
| C  | 1.214458  | -2.240029 | 0.005392  |
| C  | 2.394738  | -1.899992 | 0.005233  |
| Mg | 3.442940  | -0.174256 | 0.003416  |
| C  | 3.988495  | 2.121122  | -0.000406 |
| O  | 4.893222  | 1.261678  | 0.002942  |
| C  | 2.632889  | 1.824520  | -0.001529 |
| C  | 1.406219  | 2.272426  | -0.003039 |
| C  | 0.152748  | 2.408916  | -0.004197 |
| O  | -4.999276 | -0.967934 | -0.002469 |

16  
c60 scf done: -1006.871304

|    |          |           |           |
|----|----------|-----------|-----------|
| C  | 2.547905 | 1.596735  | -0.027163 |
| Mg | 3.614914 | -0.074704 | -0.026939 |
| C  | 5.582895 | -0.995418 | -0.038883 |
| O  | 4.600168 | -1.777999 | -0.026260 |
| C  | 2.944216 | 2.762390  | -0.036856 |
| C  | 3.503681 | 3.994689  | -0.048416 |
| C  | 4.204143 | 4.991578  | -0.059827 |
| C  | 5.179505 | 5.933385  | -0.073263 |
| C  | 6.160802 | 6.687591  | -0.085725 |
| Mg | 7.797411 | 5.488701  | -0.093147 |
| C  | 9.547337 | 3.890269  | -0.099532 |
| O  | 9.814459 | 5.101484  | -0.108482 |
| C  | 8.231212 | 3.390071  | -0.085315 |
| C  | 7.726014 | 2.158513  | -0.074218 |
| C  | 7.089460 | 1.089315  | -0.062895 |
| C  | 6.269734 | 0.038645  | -0.050303 |

16

c28 scf done: -1006.877620

|    |           |           |           |
|----|-----------|-----------|-----------|
| C  | -0.759561 | 2.594044  | -0.001512 |
| C  | -1.225023 | 1.308792  | -0.008379 |
| C  | -1.211817 | 0.077818  | -0.012879 |
| C  | -0.935879 | -1.229015 | -0.016407 |
| C  | -0.373915 | -2.337775 | -0.017841 |
| Mg | 1.757776  | -2.572617 | -0.008449 |
| O  | 2.337444  | -0.550829 | 0.000874  |
| C  | 1.908998  | 0.572971  | 0.002631  |
| C  | 1.577746  | 1.775306  | 0.005389  |
| C  | 0.718432  | 2.834176  | 0.005686  |
| O  | 1.132491  | 4.059470  | 0.011970  |
| Mg | 0.323481  | 5.731666  | 0.014716  |
| C  | -1.071615 | 7.315241  | 0.014702  |
| C  | -1.764243 | 6.273054  | 0.007900  |
| C  | -1.928059 | 4.911703  | 0.002142  |
| C  | -1.540237 | 3.748490  | -0.000542 |

16

t6 scf done: -1006.864381

|    |           |           |           |
|----|-----------|-----------|-----------|
| C  | 3.621962  | 0.636887  | -0.005983 |
| Mg | -4.482860 | 0.292108  | 0.013614  |
| C  | 4.831230  | 0.188579  | -0.012069 |
| O  | -3.790140 | 2.054156  | 0.023176  |
| C  | 2.302683  | 0.302378  | -0.004832 |
| C  | -4.721148 | -1.675687 | 0.001467  |
| Mg | 0.907185  | -1.268499 | -0.011364 |
| C  | -2.536796 | 1.924668  | 0.019053  |
| C  | 6.106284  | 0.041927  | -0.016243 |
| C  | -3.501973 | -1.923922 | -0.003631 |
| O  | 7.258708  | -0.180341 | -0.020626 |
| C  | -1.326719 | 1.727066  | 0.014453  |
| C  | 1.168172  | 1.056160  | 0.003197  |
| C  | -2.152641 | -2.149097 | -0.008699 |
| C  | -0.928205 | -2.143807 | -0.011987 |
| C  | -0.035938 | 1.383148  | 0.008594  |

16

t5 scf done: -1006.872430

|    |           |           |           |
|----|-----------|-----------|-----------|
| Mg | -1.999147 | 1.158057  | 0.007206  |
| C  | 3.412827  | 1.731159  | -0.008741 |
| Mg | 1.260691  | -1.652535 | 0.015506  |
| C  | -4.426673 | -1.009831 | 0.017669  |
| C  | 3.572833  | -2.157529 | 0.019812  |
| C  | -3.217497 | -0.563954 | 0.014595  |
| C  | 3.507463  | 0.454043  | -0.002539 |
| C  | -0.018573 | 3.191100  | -0.007710 |
| O  | 2.734769  | -3.077999 | 0.030147  |
| C  | 3.274967  | -0.814113 | 0.004810  |
| O  | -5.550823 | -1.303546 | 0.019760  |
| C  | -0.679863 | -1.081603 | 0.015602  |
| C  | 2.404407  | 2.576115  | -0.011162 |
| C  | -1.921677 | -1.039519 | 0.016113  |
| C  | -1.254833 | 3.046431  | -0.002650 |
| C  | 1.321698  | 3.191020  | -0.011065 |

16

c46 scf done: -1006.835602

|    |           |           |           |
|----|-----------|-----------|-----------|
| C  | 2.559076  | 1.514062  | -0.020855 |
| C  | 2.954421  | 2.810412  | -0.029884 |
| C  | 3.416709  | 3.953402  | -0.038960 |
| O  | 3.505284  | 5.211162  | -0.045395 |
| Mg | 1.546009  | 4.975078  | -0.026473 |
| C  | -0.450882 | 5.021191  | -0.007660 |
| C  | -1.517392 | 4.363050  | 0.005425  |
| C  | -2.650929 | 3.682635  | 0.019049  |
| C  | -3.146837 | 2.461005  | 0.029186  |
| C  | -2.808523 | 1.182919  | 0.031621  |
| C  | -2.502780 | -0.032521 | 0.033889  |
| Mg | -1.037725 | -1.390421 | 0.025334  |
| O  | 0.202719  | -2.925515 | 0.019658  |
| C  | 1.015734  | -1.961861 | 0.008077  |
| C  | 1.480678  | -0.819924 | -0.001360 |
| C  | 2.100771  | 0.385182  | -0.012072 |

16

|               |              |           |           |
|---------------|--------------|-----------|-----------|
| t12 scf done: | -1006.877934 |           |           |
| C             | 4.134227     | -1.143048 | -0.035003 |
| C             | -2.121056    | -2.401756 | 0.029175  |
| C             | 2.878480     | -0.815348 | -0.023366 |
| O             | 1.799084     | 3.911086  | -0.022892 |
| C             | 2.127402     | 0.328690  | -0.018500 |
| C             | -2.346561    | 1.530313  | 0.022377  |
| O             | 5.215008     | -1.556357 | -0.044725 |
| C             | 1.140004     | 1.081282  | -0.010416 |
| C             | -4.622510    | -1.668277 | 0.051564  |
| C             | -0.896553    | -2.424611 | 0.017282  |
| C             | -3.457147    | -2.102623 | 0.041309  |
| Mg            | 0.911681     | -1.554898 | -0.002462 |
| C             | 0.212794     | 2.107239  | -0.003498 |
| C             | 0.694135     | 3.497527  | -0.011213 |
| C             | -1.156295    | 1.833953  | 0.010383  |
| Mg            | -3.869946    | 0.211649  | 0.040098  |

16

|               |              |           |           |
|---------------|--------------|-----------|-----------|
| c30 scf done: | -1006.865625 |           |           |
| C             | -0.802604    | 2.662649  | 0.003906  |
| C             | -1.317332    | 1.370553  | 0.008221  |
| C             | -1.684844    | 0.191901  | 0.011581  |
| Mg            | -0.579253    | -1.473262 | 0.006473  |
| O             | 0.720400     | -3.018963 | 0.000017  |
| C             | 1.453969     | -1.987658 | -0.005378 |
| C             | 1.774535     | -0.791365 | -0.008365 |
| C             | 1.794785     | 0.551384  | -0.009695 |
| C             | 1.468435     | 1.747937  | -0.008779 |
| C             | 0.715626     | 2.878208  | -0.005243 |
| O             | 1.175983     | 4.111692  | -0.008937 |
| Mg            | 0.389966     | 5.771507  | -0.005746 |
| C             | -0.990132    | 7.368798  | 0.000793  |
| C             | -1.704476    | 6.334500  | 0.005804  |
| C             | -1.913680    | 4.990330  | 0.008162  |
| C             | -1.555358    | 3.804282  | 0.007185  |

16

|               |              |          |          |
|---------------|--------------|----------|----------|
| c43 scf done: | -1006.864317 |          |          |
| C             | 2.521758     | 0.709783 | 0.078799 |

|    |           |           |           |
|----|-----------|-----------|-----------|
| C  | 1.501046  | -0.107651 | 0.048174  |
| C  | 0.438275  | -0.755058 | 0.016930  |
| C  | -0.881466 | -0.963712 | -0.023480 |
| C  | -2.120736 | -1.054314 | -0.060637 |
| Mg | -3.335205 | 0.542512  | -0.101322 |
| O  | -4.816403 | 1.816091  | -0.148608 |
| C  | -3.850569 | 2.631367  | -0.119603 |
| C  | -2.729623 | 3.137776  | -0.085311 |
| C  | -1.554582 | 3.829663  | -0.049399 |
| C  | -0.465110 | 4.392038  | -0.015582 |
| Mg | 1.525489  | 4.657466  | 0.042414  |
| O  | 3.393044  | 5.494517  | 0.109835  |
| C  | 3.872939  | 4.345095  | 0.123489  |
| C  | 3.126944  | 3.181899  | 0.092841  |
| C  | 2.973118  | 1.897580  | 0.090525  |

16

c37 scf done: -1006.865778

|    |            |           |           |
|----|------------|-----------|-----------|
| Mg | 1.931256   | -1.165624 | -0.001771 |
| O  | 1.068121   | -2.995702 | -0.004057 |
| C  | 0.072737   | -2.231177 | -0.003996 |
| C  | -0.0636220 | -1.220810 | -0.003498 |
| C  | -1.055405  | 0.055374  | -0.002585 |
| C  | -1.098348  | 1.283960  | -0.001452 |
| C  | -0.704897  | 2.597279  | 0.000026  |
| C  | -1.512125  | 3.709726  | 0.000639  |
| C  | -1.921698  | 4.875545  | 0.001472  |
| C  | -1.778854  | 6.232001  | 0.002677  |
| C  | -1.107661  | 7.293194  | 0.003891  |
| Mg | 0.328320   | 5.747477  | 0.003235  |
| O  | 1.208173   | 4.130177  | 0.002338  |
| C  | 0.802618   | 2.878896  | 0.001109  |
| C  | 1.659216   | 1.801976  | 0.000718  |
| C  | 2.343691   | 0.762755  | 0.000318  |

16

t1 scf done: -1006.888911

|    |           |           |           |
|----|-----------|-----------|-----------|
| C  | 3.814837  | 1.049033  | 0.000276  |
| C  | -4.277313 | 1.226581  | -0.001201 |
| C  | 2.979425  | 2.094779  | 0.000575  |
| C  | -3.026895 | 1.234421  | -0.000888 |
| C  | 1.807583  | 2.477304  | 0.000418  |
| Mg | -4.308722 | -0.948363 | -0.001767 |
| C  | 4.135416  | -0.135670 | 0.000022  |
| C  | -1.672022 | 0.948546  | -0.000669 |
| C  | 3.286788  | -2.590411 | -0.000579 |
| O  | -0.106940 | -0.849814 | -0.000867 |
| C  | 3.794469  | -1.450976 | -0.000538 |
| Mg | 1.389907  | -1.908639 | -0.000903 |
| C  | 0.479703  | 2.381606  | 0.000210  |
| C  | -1.342126 | -0.514493 | -0.000970 |
| C  | -0.620926 | 1.830678  | -0.000203 |
| O  | -2.263541 | -1.346108 | -0.001433 |

16

c39 scf done: -1006.871713

|   |          |           |           |
|---|----------|-----------|-----------|
| C | 2.169833 | -0.835627 | -0.206051 |
| C | 2.150833 | -2.094354 | -0.242625 |

|    |           |           |           |
|----|-----------|-----------|-----------|
| Mg | 0.194445  | -2.001071 | 0.160895  |
| O  | -1.530834 | -1.232403 | 0.335710  |
| C  | -1.399974 | 0.016229  | 0.201812  |
| C  | -1.231568 | 1.219778  | 0.051999  |
| C  | -0.725407 | 2.499069  | -0.092576 |
| C  | -1.452125 | 3.640869  | -0.329971 |
| C  | -1.809665 | 4.822684  | -0.432636 |
| C  | -1.652933 | 6.159311  | -0.199687 |
| C  | -1.000536 | 7.184261  | 0.118595  |
| Mg | 0.315675  | 5.560942  | 0.423561  |
| O  | 1.195680  | 3.929995  | 0.404706  |
| C  | 0.768924  | 2.734019  | 0.085085  |
| C  | 1.573291  | 1.647033  | -0.071339 |
| C  | 2.033280  | 0.504316  | -0.208412 |

16

|                           |           |           |           |
|---------------------------|-----------|-----------|-----------|
| c8 scf done: -1006.885390 |           |           |           |
| C                         | -0.529179 | 2.496054  | -0.000140 |
| C                         | -0.943159 | 1.187985  | -0.000382 |
| C                         | -1.103994 | -0.047679 | -0.000311 |
| C                         | -1.069309 | -1.369964 | -0.000731 |
| C                         | 0.018274  | -2.207256 | -0.000217 |
| C                         | 1.202607  | -1.666526 | -0.000965 |
| C                         | 2.059154  | -0.729952 | 0.003238  |
| C                         | 2.089879  | 0.579158  | 0.001199  |
| C                         | 1.750133  | 1.776965  | 0.000731  |
| C                         | 0.869020  | 2.847054  | 0.000188  |
| O                         | 1.259428  | 4.082585  | 0.000110  |
| Mg                        | 0.099491  | 5.572318  | -0.000375 |
| O                         | -0.723483 | 7.218138  | -0.001149 |
| Mg                        | -2.415447 | 6.615338  | -0.001053 |
| C                         | -2.170116 | 4.577514  | -0.000140 |
| C                         | -1.447280 | 3.580761  | -0.000003 |

16

|                            |           |           |           |
|----------------------------|-----------|-----------|-----------|
| t38 scf done: -1006.923454 |           |           |           |
| O                          | 3.606106  | 0.516378  | 0.374576  |
| C                          | -3.619203 | 1.948044  | 0.264140  |
| C                          | 2.110285  | -1.236035 | -0.037928 |
| C                          | -2.281127 | 2.141669  | 0.372222  |
| C                          | -0.428175 | -1.831786 | -0.287011 |
| C                          | -4.814310 | 1.622539  | 0.138061  |
| C                          | 0.770550  | -1.641717 | -0.186468 |
| C                          | -1.067954 | 1.999590  | 0.409533  |
| C                          | -1.779742 | -1.873375 | -0.367508 |
| C                          | 0.214026  | 1.604899  | 0.402186  |
| C                          | -3.006222 | -1.796622 | -0.418813 |
| Mg                         | -4.358754 | -0.320245 | -0.208780 |
| C                          | 2.389202  | 0.168634  | 0.244043  |
| C                          | 1.294731  | 1.039387  | 0.351666  |
| Mg                         | 4.842170  | -1.046776 | 0.142153  |
| O                          | 3.102172  | -2.021782 | -0.134836 |

16

|                            |          |           |           |
|----------------------------|----------|-----------|-----------|
| t85 scf done: -1006.860490 |          |           |           |
| O                          | 2.589459 | 3.768718  | 0.135660  |
| Mg                         | 1.900921 | -2.944483 | -0.193070 |
| C                          | 2.977426 | 2.572044  | 0.068058  |

|    |           |           |           |
|----|-----------|-----------|-----------|
| C  | 2.947068  | -1.242065 | -0.126105 |
| Mg | 0.872128  | 2.773749  | 0.114770  |
| C  | 0.220014  | -4.062019 | -0.220914 |
| C  | -1.001087 | 2.062142  | 0.111635  |
| O  | -5.071649 | -0.500695 | 0.053018  |
| C  | 2.955171  | 1.340970  | 0.005616  |
| C  | -4.219064 | 0.313425  | 0.078840  |
| C  | -1.877702 | 1.201699  | 0.083160  |
| C  | -0.673530 | -3.200029 | -0.161201 |
| C  | 3.014143  | -0.018879 | -0.064698 |
| C  | -2.191279 | -1.136456 | -0.029901 |
| C  | -2.757516 | 0.121135  | 0.043701  |
| C  | -1.568808 | -2.189428 | -0.094222 |

16

c12 scf done: -1006.870568

|    |           |           |           |
|----|-----------|-----------|-----------|
| C  | -0.678044 | 2.418972  | -0.001905 |
| C  | -1.333390 | 1.203306  | -0.010887 |
| C  | -1.309308 | -0.037374 | -0.014399 |
| C  | -1.040902 | -1.344536 | -0.016502 |
| C  | 0.119100  | -1.843077 | -0.009747 |
| C  | 1.435139  | -1.960327 | 0.000213  |
| C  | 2.039247  | -0.831922 | 0.008604  |
| C  | 2.299295  | 0.441017  | 0.014467  |
| C  | 1.582946  | 1.488291  | 0.012551  |
| C  | 0.750364  | 2.509105  | 0.009208  |
| Mg | 0.836338  | 4.609522  | 0.012974  |
| O  | 0.817142  | 6.439747  | 0.011800  |
| Mg | -0.861699 | 7.037450  | 0.001900  |
| O  | -2.412095 | 5.937960  | -0.008496 |
| C  | -1.922139 | 4.768842  | -0.006155 |
| C  | -1.375976 | 3.675516  | -0.003628 |

16

t10 scf done: -1006.868009

|    |           |           |           |
|----|-----------|-----------|-----------|
| Mg | -3.839257 | -1.327372 | 0.023361  |
| C  | 2.104159  | 1.740044  | 0.010838  |
| C  | -2.171828 | -2.400485 | 0.010545  |
| C  | 3.422810  | 2.219753  | 0.008732  |
| C  | -0.942176 | -2.418316 | 0.005178  |
| O  | 4.416441  | 1.479194  | 0.002881  |
| C  | -3.992485 | 1.176302  | 0.033268  |
| C  | 0.873808  | 2.209211  | 0.017025  |
| C  | -2.863386 | 1.901968  | 0.030958  |
| Mg | 3.128615  | -0.117349 | -0.000036 |
| C  | -1.667702 | 2.225230  | 0.026976  |
| C  | -0.365992 | 2.392589  | 0.022329  |
| C  | 0.416822  | -2.378323 | -0.000779 |
| O  | 2.870201  | -1.976363 | -0.010381 |
| C  | -4.963691 | 0.389091  | 0.035049  |
| C  | 1.622885  | -2.211291 | -0.005737 |

16

t24 scf done: -1006.856045

|   |           |           |           |
|---|-----------|-----------|-----------|
| C | -2.772286 | 1.513550  | -0.019706 |
| C | 4.528151  | -1.612225 | 0.040102  |
| C | -4.103694 | 1.155457  | -0.038300 |
| C | 4.167545  | -0.416260 | 0.045523  |

|    |           |           |           |
|----|-----------|-----------|-----------|
| O  | -4.550962 | -0.000346 | -0.051622 |
| C  | 3.710212  | 0.849273  | 0.050315  |
| C  | -1.791834 | 2.343320  | -0.002031 |
| C  | -1.164211 | -2.043980 | -0.014830 |
| C  | -0.657236 | 2.934172  | 0.015802  |
| Mg | 2.762582  | -2.566318 | 0.012018  |
| Mg | -2.617279 | -0.711151 | -0.031082 |
| C  | 2.880760  | 1.768695  | 0.048329  |
| C  | 0.635025  | 2.846494  | 0.030477  |
| C  | -0.075176 | -2.612456 | -0.015431 |
| C  | 1.871244  | 2.614426  | 0.042956  |
| O  | 1.046889  | -3.211877 | -0.013956 |

16

t11 scf done: -1006.863183

|    |           |           |           |
|----|-----------|-----------|-----------|
| C  | 0.596884  | 2.485117  | -0.020466 |
| C  | 2.552522  | -1.834573 | -0.018137 |
| C  | -1.652426 | 1.250457  | -0.018235 |
| C  | 1.691766  | 3.057743  | -0.021964 |
| C  | 3.019113  | -0.702613 | -0.019946 |
| C  | -4.122264 | 0.961263  | -0.016735 |
| Mg | 2.896510  | 1.286218  | -0.021771 |
| C  | 1.215107  | -4.066884 | -0.013863 |
| C  | -2.522486 | -0.958356 | -0.015158 |
| C  | -0.621458 | 1.913188  | -0.019202 |
| C  | -2.754367 | 0.418470  | -0.016654 |
| O  | 2.929791  | 3.267422  | -0.023240 |
| C  | 1.881102  | -3.024508 | -0.015937 |
| Mg | -0.699988 | -3.477076 | -0.013044 |
| O  | -4.475324 | 2.087736  | -0.017977 |
| C  | -2.203596 | -2.145967 | -0.013653 |

16

t8 scf done: -1006.898970

|    |           |           |           |
|----|-----------|-----------|-----------|
| C  | -4.294639 | 1.082655  | 0.001076  |
| C  | 2.984450  | 0.758768  | -0.014385 |
| C  | 3.044185  | -0.681307 | -0.011876 |
| C  | -0.682908 | -1.973598 | -0.001690 |
| C  | 1.822277  | -1.412669 | -0.008101 |
| Mg | 5.174764  | 0.600473  | -0.018927 |
| C  | -3.142132 | 1.540812  | -0.002098 |
| Mg | -3.550346 | -0.905273 | 0.002594  |
| C  | -0.642955 | 2.029146  | -0.008351 |
| O  | 4.179946  | -1.233343 | -0.013104 |
| O  | -5.206618 | 0.215117  | 0.004269  |
| C  | 0.668030  | 1.888623  | -0.011234 |
| C  | 0.655706  | -1.754691 | -0.005033 |
| C  | 1.808177  | 1.374267  | -0.013031 |
| C  | -1.907942 | -2.048994 | 0.000970  |
| C  | -1.879150 | 1.989018  | -0.005562 |

16

c7 scf done: -1006.831678

|    |           |           |           |
|----|-----------|-----------|-----------|
| C  | -2.051376 | -0.833565 | -0.063883 |
| Mg | -3.425111 | 0.636807  | -0.098801 |
| O  | -4.998244 | 1.793818  | -0.140072 |
| C  | -4.050064 | 2.645131  | -0.112192 |
| C  | -2.914181 | 3.125857  | -0.079841 |

|    |           |           |           |
|----|-----------|-----------|-----------|
| C  | -1.761555 | 3.861513  | -0.045930 |
| C  | -0.707829 | 4.461603  | -0.014101 |
| C  | -0.821971 | -0.808263 | -0.029361 |
| C  | 0.499303  | -0.536447 | 0.008289  |
| C  | 1.607887  | -0.025643 | 0.040557  |
| C  | 2.624407  | 0.848981  | 0.071014  |
| C  | 3.359633  | 1.823762  | 0.094038  |
| C  | 3.816576  | 3.102209  | 0.110149  |
| C  | 4.113340  | 4.311811  | 0.122852  |
| Mg | 2.196110  | 4.903598  | 0.070221  |
| O  | 0.386036  | 5.099427  | 0.019682  |

16

c41 scf done: -1006.873299

|    |           |           |           |
|----|-----------|-----------|-----------|
| C  | 1.871108  | -0.706059 | -0.000873 |
| C  | 1.530627  | -1.999409 | -0.002539 |
| C  | 0.834327  | -3.044962 | -0.004324 |
| Mg | -1.045276 | -1.877567 | -0.005100 |
| O  | -1.194304 | 0.246365  | -0.003142 |
| C  | -0.538719 | 1.282756  | -0.001396 |
| C  | -0.797494 | 2.720535  | -0.000288 |
| C  | -1.674876 | 3.775712  | -0.000233 |
| C  | -1.944453 | 4.977701  | 0.000662  |
| C  | -1.665403 | 6.317403  | 0.002321  |
| C  | -0.910861 | 7.316568  | 0.004184  |
| Mg | 0.429575  | 5.721741  | 0.004113  |
| O  | 1.289046  | 4.025660  | 0.003379  |
| C  | 0.636806  | 2.934919  | 0.001549  |
| C  | 0.921822  | 1.530193  | 0.000391  |
| C  | 1.856994  | 0.533489  | 0.000366  |

16

t15 scf done: -1006.883378

|    |           |           |           |
|----|-----------|-----------|-----------|
| C  | -5.362433 | 0.948890  | 0.139158  |
| O  | 7.796295  | -0.846367 | -0.265829 |
| C  | -4.146057 | 1.208966  | 0.207746  |
| C  | 6.660528  | -0.575722 | -0.202098 |
| Mg | -4.936461 | -0.951315 | -0.332380 |
| C  | 5.417393  | -0.280599 | -0.132618 |
| C  | -1.418313 | -1.107324 | -0.360138 |
| C  | 4.180395  | 0.015608  | -0.062826 |
| C  | -2.523811 | -1.872683 | -0.554137 |
| C  | 2.923106  | 0.308586  | 0.006097  |
| C  | -0.494323 | -0.323759 | -0.162124 |
| C  | 1.712391  | 0.632056  | 0.082753  |
| C  | -3.611160 | -2.447945 | -0.700790 |
| C  | 0.358132  | 0.778516  | 0.114883  |
| O  | -0.280423 | 1.896296  | 0.391098  |
| Mg | -2.128547 | 1.445812  | 0.273080  |

16

c83 scf done: -1006.849211

|   |           |          |           |
|---|-----------|----------|-----------|
| C | -0.810051 | 0.000000 | 1.119039  |
| C | 0.660078  | 0.000000 | 1.149306  |
| C | -1.558093 | 0.000000 | 2.293405  |
| C | -1.522434 | 0.000000 | -0.080252 |
| C | -2.324171 | 0.000000 | 3.258574  |
| C | -2.219848 | 0.000000 | -1.096010 |



|    |            |           |           |
|----|------------|-----------|-----------|
| Mg | -4.287251  | -0.000000 | 3.696197  |
| Mg | -4.151056  | 0.000000  | -1.656701 |
| C  | -6.209690  | -0.000000 | 3.158578  |
| C  | -6.102699  | -0.000000 | -1.235601 |
| C  | -6.927472  | -0.000000 | 2.169116  |
| C  | -6.867561  | -0.000000 | -0.281958 |
| C  | -7.618426  | -0.000000 | 0.925987  |
| C  | -8.952024  | -0.000000 | 0.893566  |
| O  | 1.417236   | 0.000000  | 0.243425  |
| O  | -10.100234 | -0.000000 | 0.865334  |

16

t65 scf done: -1006.861654

|    |           |           |           |
|----|-----------|-----------|-----------|
| Mg | 0.060162  | 0.706218  | 0.936449  |
| C  | 1.681683  | -0.376694 | -0.240725 |
| O  | -9.061708 | -0.022280 | 0.414621  |
| C  | 2.939513  | -0.286515 | -0.178848 |
| C  | -7.900941 | -0.088662 | 0.314888  |
| C  | 5.487002  | -0.053257 | -0.000546 |
| C  | -6.636746 | -0.162883 | 0.205101  |
| C  | 4.238072  | -0.164364 | -0.084597 |
| C  | -5.354415 | -0.233274 | 0.097596  |
| C  | 6.768037  | 0.059287  | 0.084083  |
| C  | -4.104209 | -0.303342 | -0.008733 |
| O  | 9.190484  | 0.278996  | 0.250218  |
| C  | -2.804229 | -0.382301 | -0.126550 |
| C  | 8.030914  | 0.174408  | 0.171491  |
| C  | -1.545432 | -0.430709 | -0.211269 |
| Mg | 0.074160  | -1.245140 | -1.107585 |

16

c38 scf done: -1006.877779

|    |           |           |           |
|----|-----------|-----------|-----------|
| C  | 2.727432  | -0.501959 | -0.008749 |
| Mg | 1.148435  | -1.749013 | -0.002108 |
| O  | -0.639231 | -2.589615 | 0.004777  |
| C  | -0.937945 | -1.349154 | 0.005230  |
| C  | -0.908237 | -0.114708 | 0.004452  |
| C  | -0.397838 | 1.162068  | 0.001855  |
| C  | -0.692375 | 2.588897  | 0.002164  |
| C  | -1.611421 | 3.602136  | 0.005015  |
| C  | -1.940786 | 4.793333  | 0.005561  |
| C  | -1.714656 | 6.140711  | 0.003939  |
| C  | -1.014210 | 7.180570  | 0.000719  |
| Mg | 0.405795  | 5.640822  | -0.003711 |
| O  | 1.354375  | 4.022419  | -0.006317 |
| C  | 0.732779  | 2.887662  | -0.003333 |
| C  | 1.042170  | 1.501820  | -0.003645 |
| C  | 2.044630  | 0.539057  | -0.006783 |

Optimized geometries of Cl2O2Mg2 (singlets) obtained at the PBE0/SDDALL level (through AUTOMATON)

16

0.000000 Kcal/mol 0.000000 eV -101.383681 H Child\_4\_40.log

|    |           |           |           |
|----|-----------|-----------|-----------|
| 6  | 4.059637  | 1.211947  | 0.004878  |
| 6  | -4.285170 | 1.362850  | -0.014551 |
| 6  | 3.082382  | 2.145231  | 0.015242  |
| 6  | -3.030628 | 1.248122  | -0.014324 |
| 6  | 1.869965  | 2.404103  | 0.011247  |
| 12 | -4.347621 | -0.655120 | 0.001589  |
| 6  | 4.403669  | 0.021937  | -0.008320 |
| 6  | -1.682247 | 0.785043  | -0.005121 |
| 6  | 3.272687  | -2.302470 | -0.003620 |
| 8  | -0.370653 | -1.225084 | 0.003852  |
| 6  | 3.996800  | -1.278855 | -0.017500 |
| 12 | 1.276050  | -1.966193 | -0.000135 |
| 6  | 0.542452  | 2.175488  | 0.000369  |
| 6  | -1.540885 | -0.630211 | 0.007037  |
| 6  | -0.553239 | 1.608097  | -0.006504 |
| 8  | -2.623558 | -1.406409 | 0.017342  |

16

0.463557 Kcal/mol 0.020102 eV -101.382942 H MutD\_10\_74.log

|    |           |           |           |
|----|-----------|-----------|-----------|
| 6  | 3.193113  | -0.691167 | -0.029228 |
| 6  | 1.566662  | 3.040046  | -0.127460 |
| 6  | 0.897974  | -1.937903 | -0.085382 |
| 8  | -4.511973 | -0.521119 | 0.059092  |
| 6  | -3.950807 | 0.641881  | 0.098713  |
| 6  | -1.585293 | -2.704046 | -0.071235 |
| 12 | -3.478687 | -2.085120 | -0.010272 |
| 6  | 2.026561  | -1.449235 | -0.061862 |
| 12 | 2.656100  | 1.356188  | -0.097635 |
| 6  | -1.025427 | 2.933267  | 0.035202  |
| 6  | 0.320070  | 3.086511  | -0.019733 |
| 6  | 4.467392  | -0.983680 | 0.089059  |
| 6  | -3.247979 | 1.646687  | 0.071405  |
| 8  | 5.652149  | -1.107731 | 0.203789  |
| 6  | -2.157074 | 2.446384  | 0.054877  |
| 6  | -0.380254 | -2.399082 | -0.089050 |

16

1.517371 Kcal/mol 0.065800 eV -101.381263 H Child\_9\_11.log

|    |           |           |           |
|----|-----------|-----------|-----------|
| 8  | -5.216659 | -2.122420 | -0.886757 |
| 8  | 5.443366  | -1.967851 | 0.456925  |
| 6  | -4.256604 | -1.572857 | -0.457533 |
| 6  | 4.376828  | -1.469738 | 0.295127  |
| 6  | -3.266215 | -0.897298 | 0.057037  |
| 12 | -2.997152 | 1.042606  | 0.797675  |
| 6  | 1.580691  | 2.551243  | -1.010732 |
| 6  | -1.893883 | -1.168638 | 0.116262  |
| 6  | 3.267864  | -0.821486 | 0.075240  |
| 6  | -1.713259 | 2.592764  | 0.922389  |
| 12 | 2.906978  | 1.049048  | -0.802052 |
| 6  | -0.664959 | -1.211966 | 0.218243  |
| 6  | 1.916471  | -1.124174 | 0.239410  |
| 6  | -0.656826 | 2.828512  | 0.313286  |
| 6  | 0.501783  | 2.760073  | -0.434015 |

|          |           |           |           |             |                  |
|----------|-----------|-----------|-----------|-------------|------------------|
| 6        | 0.686180  | -1.196047 | 0.247147  |             |                  |
| 16       |           |           |           |             |                  |
| 2.031357 | Kcal/mol  | 0.088088  | eV        | -101.380443 | H Child_1_29.log |
| 8        | 3.046309  | 1.366615  | -0.030654 |             |                  |
| 8        | -4.419404 | -1.311160 | 0.055101  |             |                  |
| 6        | 0.666162  | 1.440268  | -0.055663 |             |                  |
| 6        | -3.169513 | -1.703658 | 0.034611  |             |                  |
| 6        | 1.867450  | 0.701552  | -0.069754 |             |                  |
| 6        | -0.606126 | -1.722614 | -0.041825 |             |                  |
| 6        | -0.474190 | 1.892924  | -0.020073 |             |                  |
| 6        | -1.955582 | -1.871623 | -0.005636 |             |                  |
| 12       | 4.639583  | 0.404744  | 0.110619  |             |                  |
| 6        | 0.571095  | -1.377853 | -0.066223 |             |                  |
| 6        | 1.811268  | -0.706585 | -0.071531 |             |                  |
| 6        | 4.316337  | -1.601952 | 0.020524  |             |                  |
| 6        | -1.813791 | 2.122333  | 0.003839  |             |                  |
| 6        | 3.087917  | -1.338871 | -0.027478 |             |                  |
| 6        | -3.057173 | 2.112800  | 0.016835  |             |                  |
| 12       | -4.346114 | 0.584925  | 0.014270  |             |                  |
| 16       |           |           |           |             |                  |
| 6.730402 | Kcal/mol  | 0.291858  | eV        | -101.372955 | H MutD_9_72.log  |
| 12       | -2.439497 | 1.457861  | -0.147399 |             |                  |
| 6        | 3.390880  | 1.843417  | 0.051195  |             |                  |
| 12       | 0.925829  | -2.822576 | -0.077183 |             |                  |
| 6        | -4.355727 | -0.814444 | 0.103666  |             |                  |
| 6        | 3.467479  | -1.804316 | 0.065924  |             |                  |
| 6        | -3.090221 | -0.543380 | -0.063601 |             |                  |
| 6        | 3.843189  | 0.693164  | 0.053282  |             |                  |
| 6        | -0.069184 | 3.339589  | 0.001311  |             |                  |
| 8        | 2.808599  | -2.915024 | 0.059544  |             |                  |
| 6        | 3.911022  | -0.657283 | 0.056345  |             |                  |
| 8        | -5.529305 | -0.932728 | 0.262142  |             |                  |
| 6        | -0.888385 | -2.001283 | -0.169167 |             |                  |
| 6        | 2.412167  | 2.770905  | 0.041667  |             |                  |
| 6        | -1.954570 | -1.367164 | -0.120061 |             |                  |
| 6        | -1.297358 | 3.123156  | -0.029463 |             |                  |
| 6        | 1.285653  | 3.277404  | 0.029150  |             |                  |
| 16       |           |           |           |             |                  |
| 8.018000 | Kcal/mol  | 0.347694  | eV        | -101.370903 | H Child_5_58.log |
| 6        | 3.517739  | 0.218152  | -0.045859 |             |                  |
| 12       | -4.827752 | 0.478737  | -0.074995 |             |                  |
| 6        | 4.789604  | 0.070684  | -0.178338 |             |                  |
| 8        | -3.798034 | 2.027650  | -0.053245 |             |                  |
| 6        | 2.226297  | 0.213444  | 0.093103  |             |                  |
| 6        | -4.513548 | -1.493917 | -0.049520 |             |                  |
| 12       | 0.954060  | -1.474246 | 0.112305  |             |                  |
| 6        | -2.505121 | 2.100346  | 0.006830  |             |                  |
| 6        | 6.065834  | 0.102572  | -0.096200 |             |                  |
| 6        | -3.392117 | -2.036060 | -0.047172 |             |                  |
| 8        | 7.259698  | 0.161702  | -0.023056 |             |                  |
| 6        | -1.278131 | 2.039177  | 0.067492  |             |                  |
| 6        | 1.110131  | 1.046367  | 0.129227  |             |                  |
| 6        | -2.073109 | -2.381720 | -0.006896 |             |                  |
| 6        | -0.832202 | -2.436455 | 0.039554  |             |                  |
| 6        | 0.016456  | 1.629292  | 0.114892  |             |                  |

16  
9.143178 Kcal/mol 0.396486 eV -101.369110 H Child\_11\_8.log  
8 7.237847 -0.291129 0.304063  
8 -6.414410 -0.995640 0.102658  
6 6.056137 -0.410703 0.179441  
6 -5.239484 -0.821721 0.084642  
6 -3.980948 -0.494663 0.077059  
6 4.796716 -0.533057 0.029468  
12 -2.899505 1.311694 0.163319  
6 2.234679 -0.533834 -0.202146  
6 -2.758108 -1.149829 -0.001856  
6 1.030621 -1.194064 -0.140017  
6 -1.119839 2.299238 0.063815  
6 3.518231 -0.603843 -0.067315  
6 -0.029055 2.947198 0.102254  
6 -0.196428 -1.404530 -0.111724  
6 -1.542417 -1.385092 -0.057913  
12 0.965495 1.188603 -0.412320

16  
9.471244 Kcal/mol 0.410713 eV -101.368587 H MutD\_11\_78.log  
6 -4.025768 1.057821 0.047073  
6 2.915613 0.744393 -0.021407  
6 2.946457 -0.654901 -0.034706  
6 -0.727553 -2.145087 -0.007173  
6 1.737215 -1.386473 -0.040216  
12 5.005080 0.448785 0.077934  
6 -3.078585 1.840944 -0.006826  
12 -3.794510 -1.506164 0.000642  
6 -0.584478 2.426055 -0.040553  
8 4.143225 -1.296205 0.004888  
8 -4.867467 0.061330 0.072827  
6 0.724111 2.132229 -0.035199  
6 0.593527 -1.831871 -0.017128  
6 1.823077 1.556063 -0.031764  
6 -1.962163 -2.298262 -0.038947  
6 -1.816936 2.320347 -0.033925

16  
10.899414 Kcal/mol 0.472644 eV -101.366311 H Child\_8\_52.log  
6 -1.746536 3.055154 -0.223860  
8 -5.100639 -1.638267 0.748731  
12 -2.699773 1.273619 -0.158564  
12 1.351276 -2.467795 -0.330054  
6 -0.549175 3.386175 -0.121203  
8 3.199196 -2.831380 0.090597  
6 0.804040 3.406671 -0.032107  
6 2.947920 2.047137 0.204600  
6 -4.016815 -1.360699 0.318201  
6 -2.884877 -0.850691 -0.132428  
6 3.611634 -1.610701 0.303498  
6 -1.645815 -1.412556 -0.455924  
6 -0.491227 -1.816820 -0.707462  
6 3.760605 -0.384147 0.325084  
6 1.944064 2.942995 0.091605  
6 3.498434 0.945362 0.288130

15.019167 Kcal/mol 0.651294 eV -101.359746 H Child\_5\_38.log

|    |           |           |           |
|----|-----------|-----------|-----------|
| 12 | -3.590812 | -1.727027 | -0.192737 |
| 6  | 1.978372  | 3.079190  | -0.105791 |
| 6  | -2.074047 | -3.035847 | 0.089505  |
| 6  | 2.666813  | 2.063923  | -0.251546 |
| 6  | -0.846766 | -3.217261 | 0.140679  |
| 8  | 3.466738  | 1.071821  | -0.377725 |
| 6  | -3.618235 | 1.299679  | -0.062174 |
| 6  | 0.715512  | 3.554692  | 0.092115  |
| 6  | -2.756955 | 2.339208  | 0.115639  |
| 12 | 3.401966  | -0.702293 | 0.080525  |
| 6  | -1.768935 | 3.050114  | 0.329254  |
| 6  | -0.501755 | 3.529641  | 0.316673  |
| 6  | 0.520586  | -3.198089 | 0.152373  |
| 8  | 2.952125  | -2.495504 | 0.083745  |
| 6  | -4.211203 | 0.216988  | -0.287299 |
| 6  | 1.715820  | -2.925353 | 0.086970  |

16

16.929908 Kcal/mol 0.734151 eV -101.356701 H MutD\_14\_54.log

|    |           |           |           |
|----|-----------|-----------|-----------|
| 6  | 0.451963  | 2.338070  | -0.118602 |
| 6  | 3.124213  | -1.740517 | -0.103708 |
| 6  | -1.850630 | 1.191686  | -0.237744 |
| 6  | 1.612388  | 2.703547  | 0.067778  |
| 6  | 3.890996  | -0.763038 | -0.109022 |
| 6  | -4.160231 | 1.160972  | 0.004316  |
| 12 | 3.921041  | 1.221257  | 0.040865  |
| 6  | 1.095110  | -3.363562 | 0.003938  |
| 6  | -2.955713 | -0.992944 | -0.016273 |
| 6  | -0.790364 | 1.798577  | -0.204205 |
| 6  | -3.047643 | 0.427704  | -0.117492 |
| 8  | 2.900964  | 2.764599  | 0.232201  |
| 6  | 2.122242  | -2.671629 | -0.068517 |
| 12 | -0.934144 | -3.298636 | 0.121140  |
| 8  | -5.054322 | 1.914621  | 0.139728  |
| 6  | -2.594983 | -2.173068 | 0.079615  |

16

18.063784 Kcal/mol 0.783321 eV -101.354894 H MutD\_13\_60.log

|    |           |           |           |
|----|-----------|-----------|-----------|
| 6  | 3.834398  | -1.206647 | -0.120516 |
| 6  | -1.982334 | -2.814857 | 0.242482  |
| 6  | 2.537669  | -1.082854 | -0.228233 |
| 8  | 1.264151  | 4.605106  | 0.396301  |
| 6  | 1.817325  | 0.132310  | -0.235561 |
| 6  | -2.295722 | 1.942090  | -0.300759 |
| 8  | 5.005225  | -1.313822 | 0.081485  |
| 6  | 1.184991  | 1.171027  | -0.122227 |
| 6  | -4.109699 | -1.333036 | 0.133915  |
| 6  | -0.797316 | -3.187501 | 0.217923  |
| 6  | -3.176046 | -2.152243 | 0.216677  |
| 12 | 1.098717  | -2.577757 | -0.028959 |
| 6  | 0.329474  | 2.307799  | -0.045551 |
| 6  | 0.849406  | 3.522986  | 0.197149  |
| 6  | -1.086236 | 2.176384  | -0.193594 |
| 12 | -3.831255 | 0.645838  | -0.170418 |

16

18.892522 Kcal/mol 0.819258 eV -101.353573 H MutD\_12\_72.log

|           |           |           |                                  |
|-----------|-----------|-----------|----------------------------------|
| 6         | 1.220051  | 1.024594  | 0.187781                         |
| 6         | 2.701481  | -1.161373 | 0.169120                         |
| 6         | 0.908621  | 3.317113  | -0.315992                        |
| 6         | -1.045503 | 2.060038  | 0.275450                         |
| 6         | 0.364107  | 2.160479  | 0.095659                         |
| 12        | -3.898686 | 0.628066  | 0.354712                         |
| 6         | -2.245776 | 1.798389  | 0.411796                         |
| 6         | -2.151336 | -2.505766 | -0.329342                        |
| 12        | 1.006666  | -2.309260 | -0.191819                        |
| 6         | -3.405193 | -1.975904 | -0.217420                        |
| 6         | -0.943506 | -2.753503 | -0.401205                        |
| 8         | 5.193051  | -1.402694 | 0.219329                         |
| 6         | 1.959429  | 0.040928  | 0.218833                         |
| 6         | 4.004902  | -1.276037 | 0.223285                         |
| 6         | -4.423904 | -1.258677 | -0.103687                        |
| 8         | 1.437450  | 4.321774  | -0.624377                        |
| 16        |           |           |                                  |
| 22.623145 | Kcal/mol  | 0.981034  | eV -101.347628 H Child_10_51.log |
| 12        | -3.489910 | -1.210672 | -0.030559                        |
| 12        | 4.621847  | 1.081606  | -0.662323                        |
| 8         | -5.009703 | -0.085815 | -0.585430                        |
| 8         | 4.398652  | -0.991446 | -0.360506                        |
| 6         | 3.139479  | -0.706104 | 0.067183                         |
| 6         | -4.216640 | 0.952509  | -0.456401                        |
| 6         | 2.060012  | -1.623259 | 0.144070                         |
| 6         | -1.694497 | -2.107706 | 0.283290                         |
| 6         | 2.777449  | 0.629635  | 0.290234                         |
| 6         | -3.234684 | 1.645526  | -0.198827                        |
| 6         | 1.602697  | 1.229799  | 0.613357                         |
| 6         | -1.980578 | 2.041086  | 0.152901                         |
| 6         | 0.491325  | 1.757111  | 0.729311                         |
| 6         | -0.814329 | 2.037618  | 0.499022                         |
| 6         | -0.462487 | -2.166747 | 0.284199                         |
| 6         | 0.883114  | -1.994986 | 0.238671                         |
| 16        |           |           |                                  |
| 23.775234 | Kcal/mol  | 1.030993  | eV -101.345792 H Child_14_22.log |
| 6         | -4.287693 | 0.671249  | 1.646460                         |
| 8         | 7.087266  | -0.783538 | 1.546912                         |
| 6         | -3.544470 | 1.595766  | 1.242278                         |
| 6         | 6.103427  | -0.512556 | 0.925307                         |
| 12        | -4.443344 | -1.279637 | 1.147175                         |
| 6         | 5.087468  | -0.206462 | 0.208967                         |
| 6         | -1.488329 | -1.284491 | -1.419021                        |
| 6         | 3.956956  | 0.073717  | -0.324283                        |
| 6         | -2.541114 | -1.992661 | -0.923112                        |
| 6         | 2.785151  | 0.334309  | -0.787237                        |
| 6         | -0.578987 | -0.459901 | -1.552524                        |
| 6         | 1.584511  | 0.544607  | -1.156892                        |
| 6         | -3.482412 | -2.415847 | -0.226045                        |
| 6         | 0.248368  | 0.654507  | -1.236190                        |
| 8         | -0.411449 | 1.767228  | -0.817843                        |
| 12        | -1.928637 | 2.122727  | 0.167925                         |
| 16        |           |           |                                  |
| 28.859863 | Kcal/mol  | 1.251484  | eV -101.337689 H MutD_10_66.log  |
| 6         | 2.572198  | 2.452454  | -0.169858                        |

|                                                             |           |           |           |
|-------------------------------------------------------------|-----------|-----------|-----------|
| 6                                                           | -1.316478 | -1.497237 | -0.043293 |
| 6                                                           | -3.177583 | 0.139038  | 0.010955  |
| 6                                                           | 4.384429  | 0.766742  | -0.036772 |
| 6                                                           | 3.751559  | -1.720042 | 0.143631  |
| 6                                                           | 1.346206  | 2.313053  | -0.104346 |
| 6                                                           | 3.784357  | 1.850196  | -0.124444 |
| 6                                                           | 4.264640  | -0.581712 | 0.093991  |
| 12                                                          | 1.745147  | -1.987134 | 0.137350  |
| 12                                                          | -3.351095 | -1.896197 | -0.248474 |
| 6                                                           | -0.773971 | 0.882698  | 0.034933  |
| 6                                                           | 0.143065  | 1.704878  | -0.032406 |
| 6                                                           | -3.858049 | 1.233218  | 0.121149  |
| 8                                                           | -0.060701 | -1.909566 | 0.004035  |
| 8                                                           | -4.578057 | 2.190836  | 0.220798  |
| 6                                                           | -1.723465 | -0.151653 | 0.028933  |
| 16                                                          |           |           |           |
| 30.028553 Kcal/mol 1.302163 eV -101.335827 H MutD_7_64.log  |           |           |           |
| 6                                                           | -1.184348 | 1.477429  | -0.213403 |
| 6                                                           | 3.831184  | -1.567198 | 0.436217  |
| 6                                                           | -2.336656 | 0.719803  | 0.125022  |
| 6                                                           | 1.311518  | -2.055260 | 0.450359  |
| 8                                                           | -4.382174 | -1.777802 | -1.199055 |
| 6                                                           | -0.098343 | 2.013767  | -0.472003 |
| 6                                                           | -1.174107 | -1.498783 | 0.128624  |
| 6                                                           | -3.416083 | -1.309558 | -0.713226 |
| 6                                                           | 4.903348  | -0.927827 | 0.307293  |
| 6                                                           | -2.347960 | -0.764436 | -0.125937 |
| 8                                                           | -4.286678 | 1.773944  | 1.309146  |
| 6                                                           | 2.541018  | -1.979841 | 0.500121  |
| 12                                                          | 1.940742  | 2.205735  | -0.580421 |
| 6                                                           | -3.362014 | 1.274792  | 0.771031  |
| 6                                                           | -0.017003 | -1.855586 | 0.329644  |
| 12                                                          | 4.513215  | 1.033186  | -0.254844 |
| 16                                                          |           |           |           |
| 36.958701 Kcal/mol 1.602683 eV -101.324783 H MutD_15_74.log |           |           |           |
| 6                                                           | 1.568377  | -1.247825 | 0.114184  |
| 8                                                           | -3.397637 | -2.169509 | 0.397095  |
| 6                                                           | 2.934471  | -0.873433 | 0.124527  |
| 6                                                           | -1.026214 | -1.365924 | 0.168252  |
| 12                                                          | -4.732883 | -0.814551 | 0.055269  |
| 6                                                           | -2.168686 | -1.816515 | 0.296307  |
| 12                                                          | -2.768316 | 1.177742  | -0.524941 |
| 6                                                           | 2.111905  | 2.735649  | 0.480022  |
| 8                                                           | 4.711167  | -2.509480 | -0.661187 |
| 6                                                           | 2.905510  | 1.650243  | 0.564846  |
| 6                                                           | 1.004323  | 3.232434  | 0.257729  |
| 6                                                           | 3.892643  | -1.752219 | -0.342542 |
| 6                                                           | 0.334425  | -1.264536 | 0.126195  |
| 6                                                           | -1.272491 | 2.576689  | -0.680815 |
| 6                                                           | 3.260505  | 0.477422  | 0.395156  |
| 6                                                           | -0.293744 | 3.160286  | -0.212398 |
| 16                                                          |           |           |           |
| 37.515007 Kcal/mol 1.626807 eV -101.323897 H Child_15_9.log |           |           |           |
| 6                                                           | 3.772851  | 1.046283  | -0.046339 |
| 6                                                           | -3.816746 | -0.965580 | -0.057433 |

|                                                              |           |           |           |
|--------------------------------------------------------------|-----------|-----------|-----------|
| 6                                                            | 3.623427  | -0.190090 | 0.136288  |
| 6                                                            | -3.586029 | 0.261339  | 0.066599  |
| 6                                                            | 2.971974  | -1.362836 | 0.254856  |
| 12                                                           | -1.979652 | -1.849756 | -0.206616 |
| 6                                                            | 2.013850  | -2.161287 | 0.285819  |
| 6                                                            | -3.034329 | 1.501228  | 0.163192  |
| 12                                                           | 1.801267  | 1.899334  | -0.222311 |
| 6                                                            | -2.169478 | 2.377668  | 0.238580  |
| 6                                                            | 0.272138  | 3.198594  | 0.141749  |
| 6                                                            | -0.009004 | -0.802155 | -0.343261 |
| 6                                                            | 0.645230  | -2.168300 | 0.098278  |
| 6                                                            | -0.951024 | 2.984853  | 0.232456  |
| 8                                                            | -0.275040 | -3.050528 | 0.212408  |
| 8                                                            | 0.742973  | 0.186374  | -0.447106 |
| 16                                                           |           |           |           |
| 38.031552 Kcal/mol 1.649206 eV -101.323073 H MutD_16_74.log  |           |           |           |
| 6                                                            | -3.139176 | 1.125418  | -0.093465 |
| 6                                                            | 3.228406  | -1.260030 | -0.089197 |
| 6                                                            | -0.912987 | 2.156886  | 0.087057  |
| 6                                                            | 0.099251  | -3.264781 | 0.038698  |
| 6                                                            | -2.296895 | 2.035081  | 0.044067  |
| 6                                                            | 3.621961  | 0.042734  | -0.100889 |
| 6                                                            | 2.458547  | -2.225044 | -0.053733 |
| 8                                                            | -0.094921 | 3.125715  | -0.077794 |
| 8                                                            | -0.714308 | -0.253730 | 0.273003  |
| 6                                                            | -3.596605 | -1.385350 | -0.233991 |
| 6                                                            | -3.628450 | -0.125896 | -0.202375 |
| 6                                                            | 3.663007  | 1.297063  | -0.110195 |
| 12                                                           | -1.574992 | -2.091526 | 0.091734  |
| 6                                                            | -0.087909 | 0.822493  | 0.241047  |
| 12                                                           | 1.757716  | 2.041222  | 0.020840  |
| 6                                                            | 1.304371  | -2.947282 | -0.012450 |
| 16                                                           |           |           |           |
| 41.149582 Kcal/mol 1.784417 eV -101.318105 H Child_11_51.log |           |           |           |
| 6                                                            | -1.912683 | -1.379703 | 0.586821  |
| 8                                                            | 5.231888  | 0.838723  | -1.687943 |
| 6                                                            | -4.059221 | -0.336500 | -0.399340 |
| 6                                                            | 4.423642  | 0.224839  | -1.076057 |
| 6                                                            | -3.004130 | -1.011083 | 0.034079  |
| 6                                                            | 2.300564  | 1.654651  | 0.954587  |
| 8                                                            | -5.742262 | 1.016121  | -1.584884 |
| 6                                                            | 3.064681  | 0.917061  | 0.350210  |
| 6                                                            | -4.915949 | 0.330787  | -1.013102 |
| 6                                                            | 0.997015  | 2.035829  | 1.059188  |
| 12                                                           | -1.859301 | 0.867928  | 0.954553  |
| 6                                                            | 3.493433  | -0.281812 | -0.306544 |
| 6                                                            | -0.709695 | -2.047857 | 0.630325  |
| 6                                                            | -0.249267 | 2.031619  | 1.092792  |
| 6                                                            | 0.462862  | -2.479864 | 0.660067  |
| 12                                                           | 2.253924  | -1.933475 | -0.059180 |
| 16                                                           |           |           |           |
| 41.280038 Kcal/mol 1.790074 eV -101.317897 H Child_11_60.log |           |           |           |
| 6                                                            | 3.410151  | -0.819446 | 0.092367  |
| 8                                                            | -4.343565 | 2.052265  | 0.134915  |
| 6                                                            | 3.476829  | 0.426754  | 0.114388  |



|                                                              |           |           |           |
|--------------------------------------------------------------|-----------|-----------|-----------|
| 6                                                            | -3.234932 | 1.488190  | 0.039704  |
| 6                                                            | -0.293357 | -4.071932 | -0.019626 |
| 6                                                            | -1.984253 | 2.201178  | 0.068836  |
| 6                                                            | 2.845272  | -2.032769 | 0.120783  |
| 6                                                            | -3.095540 | 0.057588  | -0.086783 |
| 6                                                            | 0.886923  | -3.674888 | 0.056009  |
| 6                                                            | -0.860540 | 2.712637  | 0.052127  |
| 12                                                           | -2.008828 | -2.992091 | -0.122460 |
| 6                                                            | -2.880819 | -1.155887 | -0.151200 |
| 6                                                            | 2.888269  | 1.671343  | 0.096993  |
| 12                                                           | 1.163412  | 2.834247  | 0.091363  |
| 6                                                            | 2.043148  | -2.974030 | 0.085601  |
| 8                                                            | 3.210824  | 2.812946  | -0.440167 |
| 16                                                           |           |           |           |
| 41.665464 Kcal/mol 1.806788 eV -101.317282 H Child_12_43.log |           |           |           |
| 6                                                            | -0.702366 | -0.370034 | 0.002883  |
| 12                                                           | 2.498489  | 2.761975  | -0.004814 |
| 6                                                            | -1.990021 | -0.205512 | 0.006990  |
| 8                                                            | 2.811883  | 0.917371  | 0.005760  |
| 6                                                            | -3.283973 | -0.163657 | 0.032980  |
| 6                                                            | 0.516816  | 3.176814  | -0.013924 |
| 12                                                           | 0.251824  | -2.216331 | -0.034272 |
| 6                                                            | 0.327434  | 1.932384  | -0.001242 |
| 6                                                            | 1.784541  | 0.041847  | 0.004082  |
| 6                                                            | -4.550880 | -0.166139 | 0.017805  |
| 6                                                            | 0.447834  | 0.513109  | -0.001714 |
| 6                                                            | -5.856913 | -0.201437 | 0.012262  |
| 8                                                            | 4.335936  | -2.501152 | 0.017949  |
| 6                                                            | 2.116945  | -1.370837 | 0.000243  |
| 6                                                            | 3.303680  | -1.910367 | 0.009092  |
| 6                                                            | -7.144146 | -0.255752 | -0.022897 |
| 16                                                           |           |           |           |
| 42.117184 Kcal/mol 1.826376 eV -101.316563 H Child_12_49.log |           |           |           |
| 6                                                            | -2.913120 | 1.852209  | -0.140417 |
| 6                                                            | 6.827704  | -0.647566 | 0.078497  |
| 6                                                            | -3.968330 | 1.228532  | -0.030522 |
| 6                                                            | 5.669029  | -0.092315 | 0.136346  |
| 8                                                            | -4.925838 | 0.376294  | 0.095842  |
| 6                                                            | 4.437446  | 0.348255  | 0.171604  |
| 6                                                            | -1.604479 | 2.156646  | -0.125096 |
| 6                                                            | -2.291065 | -2.141650 | 0.096000  |
| 6                                                            | -0.370307 | 2.184714  | -0.066690 |
| 12                                                           | 1.784236  | -1.004736 | -0.259090 |
| 12                                                           | -4.078458 | -1.349513 | 0.199042  |
| 6                                                            | 3.172915  | 0.570044  | 0.103332  |
| 6                                                            | 0.931387  | 1.875131  | 0.014106  |
| 6                                                            | -1.068461 | -2.023040 | -0.067029 |
| 6                                                            | 2.067760  | 1.383628  | 0.104037  |
| 8                                                            | 0.199314  | -1.865860 | -0.211396 |
| 16                                                           |           |           |           |
| 42.953979 Kcal/mol 1.862663 eV -101.315229 H MutD_17_64.log  |           |           |           |
| 6                                                            | 4.076319  | -0.321999 | 0.067809  |
| 6                                                            | -1.252282 | -2.005875 | 0.710813  |
| 12                                                           | 2.355038  | -1.195904 | -0.685075 |
| 6                                                            | -4.122682 | 0.122413  | -0.012372 |

|                                                             |           |           |           |
|-------------------------------------------------------------|-----------|-----------|-----------|
| 6                                                           | -3.482956 | -0.828213 | 0.521388  |
| 6                                                           | 2.519466  | 1.705591  | 0.588226  |
| 6                                                           | 0.003285  | -1.842094 | 0.182548  |
| 6                                                           | 1.464008  | 2.344053  | 0.559879  |
| 6                                                           | 3.436698  | 0.717600  | 0.387705  |
| 12                                                          | -2.319093 | 1.286571  | -0.540645 |
| 6                                                           | 0.195853  | -0.676795 | -0.856755 |
| 6                                                           | -1.040207 | 2.755420  | 0.105914  |
| 8                                                           | 1.097983  | -2.476491 | 0.342931  |
| 8                                                           | -0.793589 | 0.054663  | -1.092322 |
| 6                                                           | 0.174603  | 2.725928  | 0.385598  |
| 6                                                           | -2.449855 | -1.648260 | 0.809873  |
| 16                                                          |           |           |           |
| 44.781150 Kcal/mol 1.941897 eV -101.312317 H Child_6_60.log |           |           |           |
| 6                                                           | 4.726260  | -2.317180 | 0.013188  |
| 8                                                           | -6.352173 | -1.012362 | 0.043609  |
| 6                                                           | 4.201698  | -0.953939 | 0.011855  |
| 6                                                           | -5.199293 | -0.673462 | 0.022123  |
| 6                                                           | 4.146974  | 0.423385  | 0.016525  |
| 6                                                           | -3.985618 | -0.316980 | 0.004289  |
| 6                                                           | 3.308077  | -1.989614 | 0.000761  |
| 6                                                           | -2.699401 | 0.055643  | -0.020290 |
| 6                                                           | 3.827757  | 1.626593  | 0.019052  |
| 8                                                           | -2.273721 | 1.326753  | -0.029009 |
| 6                                                           | 1.942154  | -2.135333 | -0.011136 |
| 6                                                           | -1.617164 | -0.887166 | -0.028010 |
| 12                                                          | 2.076539  | 2.709538  | 0.013844  |
| 12                                                          | -0.744100 | 2.376656  | -0.014480 |
| 6                                                           | 0.727023  | -1.943577 | -0.019938 |
| 6                                                           | -0.542153 | -1.479945 | -0.026614 |
| 16                                                          |           |           |           |
| 45.139009 Kcal/mol 1.957415 eV -101.311747 H Child_5_52.log |           |           |           |
| 6                                                           | -2.864342 | 2.462112  | 0.004220  |
| 6                                                           | 4.818140  | -0.739960 | -0.000057 |
| 6                                                           | -1.506914 | 1.888650  | 0.000968  |
| 6                                                           | 3.831849  | -1.535540 | 0.000024  |
| 6                                                           | -2.590410 | 1.056096  | 0.000824  |
| 6                                                           | 0.146826  | -2.411420 | 0.001595  |
| 8                                                           | -5.508797 | -0.807463 | -0.003444 |
| 12                                                          | 3.898586  | 1.121408  | -0.001604 |
| 6                                                           | -4.370156 | -0.571597 | -0.001075 |
| 6                                                           | 2.707794  | -2.268590 | 0.000655  |
| 6                                                           | -3.029024 | -0.310762 | -0.000333 |
| 6                                                           | 1.449730  | -2.373514 | 0.001073  |
| 12                                                          | 0.551178  | 2.150253  | 0.000066  |
| 6                                                           | -1.035056 | -1.894149 | 0.001121  |
| 6                                                           | -2.238048 | -1.459821 | 0.000426  |
| 8                                                           | 2.343860  | 2.018842  | -0.001330 |
| 16                                                          |           |           |           |
| 45.524210 Kcal/mol 1.974119 eV -101.311133 H Child_8_48.log |           |           |           |
| 6                                                           | 2.662287  | -2.233132 | -0.329058 |
| 8                                                           | -0.892857 | 4.462774  | -0.608677 |
| 6                                                           | 1.457052  | -2.328704 | -0.555898 |
| 6                                                           | -0.331565 | 3.466956  | -0.277183 |
| 6                                                           | -6.054903 | -1.205142 | 0.622604  |

|    |                                                              |           |           |
|----|--------------------------------------------------------------|-----------|-----------|
| 6  | 1.439966                                                     | 1.846215  | 0.372479  |
| 8  | 3.886858                                                     | -1.928287 | -0.039987 |
| 6  | 0.149286                                                     | 2.301390  | 0.058869  |
| 6  | 0.119460                                                     | -2.126191 | -0.598787 |
| 6  | -4.790660                                                    | -1.202342 | 0.371367  |
| 12 | -1.093334                                                    | 0.618796  | 0.004029  |
| 12 | 3.919185                                                     | -0.114452 | 0.540226  |
| 6  | 2.533420                                                     | 1.303238  | 0.605665  |
| 6  | -3.511150                                                    | -1.255486 | 0.103465  |
| 6  | -2.241769                                                    | -1.159248 | -0.097034 |
| 6  | -1.075127                                                    | -1.795554 | -0.500113 |
| 16 | 45.598305 Kcal/mol 1.977332 eV -101.311015 H Child_4_53.log  |           |           |
| 6  | 3.699259                                                     | 0.253114  | -0.002091 |
| 8  | -5.112730                                                    | 1.864010  | -0.337405 |
| 6  | 4.987767                                                     | 0.178849  | -0.209882 |
| 6  | -4.200130                                                    | 1.098437  | -0.196212 |
| 8  | 6.156691                                                     | 0.010598  | -0.387701 |
| 6  | -3.264763                                                    | 0.206196  | -0.038202 |
| 12 | 2.048952                                                     | -1.087480 | 0.083346  |
| 12 | -3.203504                                                    | -1.883610 | -0.004841 |
| 6  | 0.054464                                                     | -1.711649 | 0.091638  |
| 6  | -1.794722                                                    | 0.325084  | 0.090090  |
| 6  | 2.741240                                                     | 1.247310  | 0.185872  |
| 6  | -0.890060                                                    | 1.415715  | 0.170664  |
| 6  | 0.256161                                                     | 1.852809  | 0.298331  |
| 6  | -1.183610                                                    | -2.326198 | 0.029533  |
| 6  | -1.099482                                                    | -0.848977 | 0.094106  |
| 6  | 1.611033                                                     | 1.752014  | 0.295950  |
| 16 | 45.666460 Kcal/mol 1.980288 eV -101.310906 H Child_12_10.log |           |           |
| 6  | 3.803213                                                     | -1.095954 | -0.036709 |
| 8  | -5.584144                                                    | -0.540008 | -1.126984 |
| 6  | 3.625286                                                     | 0.199689  | -0.654130 |
| 6  | -4.554020                                                    | -0.742765 | -0.569883 |
| 6  | 3.199147                                                     | 1.316805  | -0.970780 |
| 6  | -3.448946                                                    | -0.670468 | 0.125835  |
| 12 | 1.788948                                                     | 2.687372  | -0.500633 |
| 6  | -2.211263                                                    | -1.140968 | 0.418556  |
| 6  | 2.610099                                                     | -1.874348 | -0.200309 |
| 12 | -2.398317                                                    | 0.992518  | 0.991259  |
| 6  | 1.399758                                                     | -2.117201 | -0.002691 |
| 6  | -1.118314                                                    | -1.841471 | 0.287097  |
| 6  | 0.085059                                                     | -2.203513 | 0.075359  |
| 6  | -1.068387                                                    | 2.479115  | 0.836646  |
| 6  | -0.036326                                                    | 2.957879  | 0.317265  |
| 8  | 4.784218                                                     | -1.429925 | 0.671353  |
| 16 | 45.902012 Kcal/mol 1.990502 eV -101.310531 H Child_12_62.log |           |           |
| 8  | 8.152171                                                     | 0.736981  | -0.034770 |
| 12 | -4.503524                                                    | 2.092618  | -0.005886 |
| 6  | 6.968707                                                     | 0.523301  | -0.018977 |
| 6  | -2.511394                                                    | 2.244527  | 0.042542  |
| 6  | 5.721434                                                     | 0.293837  | -0.003537 |
| 8  | -5.240549                                                    | 0.275829  | -0.043702 |

|    |                                                             |           |           |
|----|-------------------------------------------------------------|-----------|-----------|
| 6  | 4.445899                                                    | 0.068876  | 0.013092  |
| 6  | -2.032380                                                   | 1.086362  | 0.025068  |
| 6  | 3.201080                                                    | -0.161404 | 0.024800  |
| 6  | -4.244477                                                   | -0.520504 | -0.031760 |
| 6  | 1.918826                                                    | -0.392006 | 0.023339  |
| 6  | -3.106008                                                   | -1.062217 | -0.012008 |
| 12 | -1.753950                                                   | -2.841136 | 0.004084  |
| 6  | -1.808290                                                   | -0.324074 | 0.009344  |
| 6  | 0.676407                                                    | -0.610707 | 0.022195  |
| 6  | -0.597017                                                   | -0.999370 | 0.014136  |
| 16 | 46.098627 Kcal/mol 1.999028 eV -101.310218 H MutD_15_54.log |           |           |
| 8  | 5.199695                                                    | -0.380390 | -0.064583 |
| 6  | 4.242026                                                    | 0.460605  | -0.036776 |
| 6  | 0.616398                                                    | 1.078273  | -0.005094 |
| 12 | 1.838862                                                    | 2.872017  | 0.064658  |
| 8  | -8.113976                                                   | -0.739710 | 0.079607  |
| 6  | -1.899694                                                   | 0.465608  | -0.052939 |
| 6  | 1.973435                                                    | -1.055534 | 0.046003  |
| 6  | -3.175607                                                   | 0.204453  | -0.081811 |
| 6  | 3.127607                                                    | 1.052407  | 0.010419  |
| 6  | -4.408822                                                   | -0.080061 | -0.074464 |
| 6  | -0.662956                                                   | 0.709618  | -0.035804 |
| 6  | -6.927092                                                   | -0.543922 | 0.018520  |
| 12 | 4.397569                                                    | -2.167796 | -0.001154 |
| 6  | 1.804254                                                    | 0.361723  | 0.013761  |
| 6  | -5.678188                                                   | -0.335319 | -0.047694 |
| 6  | 2.401481                                                    | -2.232825 | 0.098840  |
| 16 | 46.143229 Kcal/mol 2.000962 eV -101.310147 H Child_5_8.log  |           |           |
| 6  | -4.185621                                                   | 0.733376  | -0.095748 |
| 8  | 5.778521                                                    | 1.350374  | -0.193327 |
| 6  | -4.157562                                                   | 1.980512  | -0.070719 |
| 6  | 4.703353                                                    | 0.810416  | -0.115302 |
| 6  | -3.907277                                                   | -0.595891 | -0.102788 |
| 6  | 3.574889                                                    | 0.242219  | -0.052419 |
| 6  | -3.307620                                                   | -1.671037 | -0.086820 |
| 6  | 1.478228                                                    | 0.726994  | 0.193185  |
| 12 | -2.383871                                                   | 2.952337  | 0.024616  |
| 6  | 0.571469                                                    | 1.679748  | 0.148489  |
| 6  | -2.338443                                                   | -2.620404 | -0.052368 |
| 6  | 2.324101                                                    | -0.312873 | 0.077723  |
| 6  | -1.282341                                                   | -3.275462 | -0.009647 |
| 6  | -0.425897                                                   | 2.453225  | 0.131692  |
| 12 | 0.678810                                                    | -2.857357 | 0.061515  |
| 8  | 1.993613                                                    | -1.605958 | 0.090172  |
| 16 | 46.428558 Kcal/mol 2.013335 eV -101.309692 H MutD_13_40.log |           |           |
| 6  | 1.809204                                                    | 0.236451  | -0.011605 |
| 12 | 4.776994                                                    | -1.868864 | 0.002379  |
| 6  | 3.030739                                                    | 1.093344  | -0.036798 |
| 6  | -5.788620                                                   | -0.321826 | 0.005574  |
| 6  | -4.499143                                                   | -0.198196 | 0.030306  |
| 8  | 5.311520                                                    | 0.013573  | 0.008286  |
| 6  | 2.172311                                                    | -1.148069 | -0.016320 |

|                                                             |           |           |           |
|-------------------------------------------------------------|-----------|-----------|-----------|
| 6                                                           | -3.237570 | -0.065611 | 0.050207  |
| 6                                                           | 2.796159  | -2.235307 | -0.031026 |
| 6                                                           | 0.543283  | 0.795201  | 0.017591  |
| 6                                                           | 4.233227  | 0.695734  | 0.015754  |
| 12                                                          | 1.516090  | 2.751392  | -0.018228 |
| 6                                                           | -0.706252 | 0.338561  | 0.022550  |
| 8                                                           | -8.260619 | -0.507536 | -0.041161 |
| 6                                                           | -1.949795 | 0.123284  | 0.049508  |
| 6                                                           | -7.057581 | -0.420003 | -0.020207 |
| 16                                                          |           |           |           |
| 46.742519 Kcal/mol 2.026950 eV -101.309192 H MutD_16_36.log |           |           |           |
| 6                                                           | -1.851259 | -1.020045 | -0.136966 |
| 6                                                           | -1.789772 | 0.404469  | -0.069438 |
| 6                                                           | 6.809073  | -0.644778 | 0.087137  |
| 6                                                           | -0.657087 | 1.209143  | -0.075639 |
| 6                                                           | 5.645415  | -0.162026 | -0.066743 |
| 6                                                           | 4.398005  | 0.187200  | -0.114304 |
| 6                                                           | -4.218545 | 0.305541  | 0.131150  |
| 6                                                           | 1.889255  | 0.734516  | -0.140411 |
| 6                                                           | -2.201544 | -2.223344 | -0.169051 |
| 8                                                           | 7.892351  | -1.132118 | 0.249997  |
| 8                                                           | -5.104221 | -0.609786 | 0.171166  |
| 6                                                           | -3.160422 | 0.988890  | 0.051099  |
| 12                                                          | -2.011023 | 2.898405  | 0.081722  |
| 6                                                           | 0.642966  | 0.924494  | -0.126765 |
| 6                                                           | 3.168818  | 0.487224  | -0.134215 |
| 12                                                          | -4.185181 | -2.332778 | 0.019576  |
| 16                                                          |           |           |           |
| 47.038663 Kcal/mol 2.039792 eV -101.308720 H MutD_2_68.log  |           |           |           |
| 6                                                           | -3.452729 | -0.251229 | -0.053453 |
| 6                                                           | -3.101968 | 1.085849  | 0.028448  |
| 6                                                           | -4.505662 | 0.734497  | -0.105631 |
| 6                                                           | 6.004589  | 1.238089  | -0.930684 |
| 6                                                           | -1.957786 | -2.346181 | -0.341802 |
| 6                                                           | -1.930747 | 1.822585  | 0.144895  |
| 6                                                           | -0.750874 | 2.178001  | 0.202214  |
| 8                                                           | 5.033730  | 0.804857  | -0.459811 |
| 6                                                           | 0.610128  | 2.160968  | 0.207200  |
| 12                                                          | -0.023581 | -2.925617 | -0.139907 |
| 6                                                           | 1.891501  | -2.469034 | 0.295450  |
| 12                                                          | 3.141686  | 0.294233  | 0.457438  |
| 6                                                           | 2.829774  | -1.701282 | 0.634597  |
| 8                                                           | -5.694548 | 1.022582  | -0.213069 |
| 6                                                           | 1.809601  | 1.849212  | 0.301830  |
| 6                                                           | -2.800945 | -1.475292 | -0.120952 |
| 16                                                          |           |           |           |
| 47.575410 Kcal/mol 2.063068 eV -101.307864 H Child_7_8.log  |           |           |           |
| 6                                                           | 2.338806  | -1.878707 | -0.611666 |
| 6                                                           | -2.253666 | 1.584276  | -0.135906 |
| 6                                                           | 1.177916  | -2.302000 | -0.548062 |
| 6                                                           | 0.163875  | 2.476266  | -0.096496 |
| 6                                                           | 3.379946  | -0.988602 | -0.591733 |
| 6                                                           | -1.140771 | 2.094728  | -0.093884 |
| 6                                                           | 4.112399  | 0.018925  | -0.523192 |
| 6                                                           | 1.391060  | 2.658550  | -0.136466 |

|                                                              |           |           |           |
|--------------------------------------------------------------|-----------|-----------|-----------|
| 12                                                           | -0.797501 | -2.772639 | -0.484436 |
| 8                                                            | -4.595659 | 1.202276  | -0.232816 |
| 6                                                            | -2.550356 | -1.751673 | -0.416772 |
| 6                                                            | -3.432053 | 0.757776  | -0.227714 |
| 8                                                            | 0.169399  | -1.119488 | 2.304072  |
| 6                                                            | 0.901647  | -0.248031 | 2.466092  |
| 12                                                           | 3.241358  | 1.824299  | -0.274241 |
| 6                                                            | -3.074835 | -0.635210 | -0.328523 |
| 16                                                           |           |           |           |
| 47.587486 Kcal/mol 2.063591 eV -101.307845 H Child_9_42.log  |           |           |           |
| 8                                                            | 3.582387  | -0.124296 | 0.715596  |
| 6                                                            | -3.354390 | 2.139983  | 0.115467  |
| 6                                                            | 1.900180  | -1.772304 | 0.178719  |
| 6                                                            | -2.017572 | 2.256752  | 0.296342  |
| 6                                                            | -0.718982 | -2.015673 | -0.184934 |
| 6                                                            | -4.523945 | 1.733490  | -0.067471 |
| 6                                                            | 0.497532  | -1.951974 | -0.017103 |
| 6                                                            | -0.818659 | 1.980284  | 0.418049  |
| 6                                                            | -2.066161 | -1.929983 | -0.326251 |
| 6                                                            | 0.384685  | 1.387133  | 0.512628  |
| 6                                                            | -3.283289 | -1.706424 | -0.424058 |
| 12                                                           | -4.714424 | -0.267728 | -0.362206 |
| 6                                                            | 2.376571  | -0.346513 | 0.518153  |
| 6                                                            | 1.359799  | 0.646729  | 0.559182  |
| 12                                                           | 5.634793  | 1.932877  | -0.962899 |
| 8                                                            | 2.735231  | -2.689551 | 0.088020  |
| 16                                                           |           |           |           |
| 48.506863 Kcal/mol 2.103459 eV -101.306380 H Child_11_55.log |           |           |           |
| 6                                                            | 1.547265  | -1.816092 | 0.358478  |
| 8                                                            | -5.579756 | -0.477542 | -0.431115 |
| 6                                                            | 3.987706  | -0.833303 | 0.028252  |
| 6                                                            | -4.394309 | -0.400399 | -0.362147 |
| 6                                                            | 2.953917  | -1.491595 | 0.243887  |
| 6                                                            | -3.133237 | -0.170415 | -0.144531 |
| 12                                                           | 3.797503  | 1.115451  | -0.550503 |
| 12                                                           | -2.031977 | 1.388014  | 0.780886  |
| 8                                                            | 1.031067  | -2.728751 | 1.023651  |
| 6                                                            | -0.309934 | 2.466059  | 0.911372  |
| 6                                                            | 0.705089  | -0.853915 | -0.431301 |
| 6                                                            | -1.904115 | -0.746199 | -0.483161 |
| 6                                                            | 0.789365  | 2.194449  | 0.384044  |
| 6                                                            | 1.239797  | 0.349677  | -0.710367 |
| 6                                                            | -0.693720 | -0.982858 | -0.564520 |
| 6                                                            | 1.746045  | 1.552718  | -0.480819 |
| 16                                                           |           |           |           |
| 48.531968 Kcal/mol 2.104548 eV -101.306340 H MutD_8_78.log   |           |           |           |
| 6                                                            | 2.864024  | -2.119214 | -0.155278 |
| 6                                                            | -1.105014 | -2.330536 | 0.147791  |
| 6                                                            | 0.101992  | 2.269770  | -0.640960 |
| 12                                                           | -4.374922 | -0.011704 | 0.258414  |
| 6                                                            | 1.435025  | -1.930675 | -0.169440 |
| 8                                                            | 3.228811  | 2.469078  | 0.513537  |
| 6                                                            | 0.100672  | -2.217985 | -0.052642 |
| 6                                                            | -1.132705 | 2.351691  | -0.531371 |
| 6                                                            | 2.275605  | -0.832497 | -0.399303 |

|                                                              |           |           |           |
|--------------------------------------------------------------|-----------|-----------|-----------|
| 6                                                            | -3.653897 | 1.820607  | -0.166341 |
| 6                                                            | -2.442455 | -2.196958 | 0.354647  |
| 8                                                            | 3.842362  | -2.855089 | -0.018534 |
| 6                                                            | -3.634025 | -1.888808 | 0.554896  |
| 6                                                            | 3.345955  | 3.052501  | 1.513115  |
| 6                                                            | -2.479214 | 2.183564  | -0.362781 |
| 12                                                           | 1.822825  | 1.188315  | -0.634582 |
| 16                                                           |           |           |           |
| 49.264516 Kcal/mol 2.136314 eV -101.305173 H MutD_14_46.log  |           |           |           |
| 6                                                            | -4.484129 | -0.293679 | -0.040673 |
| 6                                                            | 2.948923  | 1.095367  | 0.081733  |
| 6                                                            | 3.018814  | -2.128849 | -0.482029 |
| 8                                                            | -8.212877 | -0.393179 | 0.462028  |
| 6                                                            | -5.798221 | -0.287825 | -0.022122 |
| 6                                                            | -3.222035 | -0.243080 | -0.150839 |
| 12                                                           | 4.877876  | -1.752889 | 0.156409  |
| 6                                                            | 0.513859  | 0.705750  | -0.296073 |
| 6                                                            | -0.721747 | 0.224529  | -0.364082 |
| 6                                                            | -1.950540 | -0.061117 | -0.313266 |
| 6                                                            | -7.034872 | -0.360205 | 0.232151  |
| 6                                                            | 1.796670  | 0.201161  | -0.231243 |
| 6                                                            | 2.259120  | -1.137583 | -0.395597 |
| 6                                                            | 4.094837  | 0.742244  | 0.464553  |
| 12                                                           | 1.429277  | 2.710500  | -0.161867 |
| 8                                                            | 5.186637  | 0.114227  | 0.684275  |
| 16                                                           |           |           |           |
| 49.500311 Kcal/mol 2.146539 eV -101.304797 H Child_9_47.log  |           |           |           |
| 6                                                            | -2.285557 | -2.516039 | -0.131926 |
| 8                                                            | 5.595311  | 1.571504  | -0.458892 |
| 6                                                            | -1.131484 | -3.226327 | -0.075950 |
| 6                                                            | -0.209796 | 2.162347  | 0.272406  |
| 6                                                            | -3.074986 | -1.568509 | -0.169686 |
| 6                                                            | 4.525609  | 1.074121  | -0.210628 |
| 6                                                            | 0.035910  | -3.664434 | -0.013666 |
| 6                                                            | 0.815292  | 1.466760  | 0.259711  |
| 6                                                            | -3.696219 | -0.368542 | -0.178949 |
| 6                                                            | 3.381523  | 0.556956  | 0.054243  |
| 6                                                            | -3.953867 | 0.831294  | -0.140294 |
| 12                                                           | -2.147247 | 2.656807  | 0.090607  |
| 6                                                            | 2.433815  | -0.597000 | 0.287877  |
| 6                                                            | 1.927206  | 0.645408  | 0.266712  |
| 8                                                            | -3.970126 | 2.131172  | -0.097451 |
| 12                                                           | 1.680068  | -2.523275 | 0.170364  |
| 16                                                           |           |           |           |
| 50.790696 Kcal/mol 2.202496 eV -101.302740 H Child_18_23.log |           |           |           |
| 6                                                            | -3.089800 | -1.533535 | 0.617548  |
| 6                                                            | 2.177144  | 2.835535  | 0.157979  |
| 6                                                            | -2.130553 | -2.059991 | -0.104474 |
| 6                                                            | 2.615504  | 1.724909  | 0.547290  |
| 6                                                            | -3.272925 | -0.296728 | 0.871958  |
| 6                                                            | 2.902167  | 0.409521  | 0.802080  |
| 6                                                            | -0.976697 | -2.120353 | -0.699469 |
| 12                                                           | 0.487902  | 2.158060  | -0.805911 |
| 12                                                           | 1.023119  | -2.556384 | -0.274957 |
| 6                                                            | -3.064919 | 1.001171  | 0.907710  |

|                                                              |           |           |           |
|--------------------------------------------------------------|-----------|-----------|-----------|
| 6                                                            | 2.801061  | -0.809567 | 0.742037  |
| 6                                                            | -0.431082 | -0.923130 | -1.261947 |
| 8                                                            | 2.598421  | -2.093941 | 0.617264  |
| 6                                                            | -2.248712 | 1.837453  | 0.437520  |
| 6                                                            | 0.076314  | 0.191925  | -1.518402 |
| 8                                                            | -1.383081 | 2.498520  | -0.120833 |
| 16                                                           |           |           |           |
| 50.836363 Kcal/mol 2.204476 eV -101.302668 H Child_16_21.log |           |           |           |
| 12                                                           | 1.551295  | 1.862740  | -0.007436 |
| 8                                                            | -2.703153 | -0.964955 | -1.666235 |
| 6                                                            | 3.820094  | -0.262926 | -0.146199 |
| 6                                                            | -1.538021 | -1.302972 | -1.524356 |
| 8                                                            | 4.972203  | -0.475376 | -0.371628 |
| 6                                                            | -1.923660 | -0.485419 | 2.022297  |
| 6                                                            | 2.599514  | 0.045461  | 0.172158  |
| 6                                                            | -0.576636 | -0.649930 | 2.046237  |
| 6                                                            | -0.305324 | 2.390198  | -0.528597 |
| 6                                                            | -3.092781 | -0.336227 | 1.591626  |
| 6                                                            | -1.488499 | 1.998016  | -0.647339 |
| 6                                                            | 0.701821  | -1.446140 | -0.496984 |
| 6                                                            | 1.410276  | -0.767259 | 0.417728  |
| 6                                                            | -0.342878 | -1.632695 | -1.246039 |
| 6                                                            | 0.574966  | -0.676424 | 1.586316  |
| 12                                                           | -2.983430 | 0.660640  | -0.257412 |
| 16                                                           |           |           |           |
| 51.337998 Kcal/mol 2.226229 eV -101.301868 H MutD_16_72.log  |           |           |           |
| 6                                                            | -4.236426 | -0.704374 | -0.011111 |
| 12                                                           | 6.074423  | -0.486775 | -0.037537 |
| 6                                                            | -1.813618 | -2.107117 | -0.000625 |
| 6                                                            | -2.888940 | -1.248603 | -0.003371 |
| 6                                                            | -2.238707 | 1.240864  | 0.001062  |
| 6                                                            | -3.058094 | 0.125053  | -0.001990 |
| 8                                                            | -5.447785 | -0.857426 | -0.021299 |
| 8                                                            | -0.106636 | 4.086797  | -0.007449 |
| 12                                                           | 2.950307  | -0.619932 | 0.023315  |
| 6                                                            | 0.699818  | -2.609757 | 0.011060  |
| 6                                                            | 1.994842  | 1.204532  | 0.024027  |
| 6                                                            | -0.114166 | 2.840775  | 0.004209  |
| 6                                                            | 1.927582  | -2.400848 | 0.018683  |
| 6                                                            | 1.064526  | 2.019605  | 0.016444  |
| 6                                                            | -0.650806 | -2.509802 | 0.005138  |
| 6                                                            | -1.329576 | 2.057256  | 0.003251  |
| 16                                                           |           |           |           |
| 51.345862 Kcal/mol 2.226570 eV -101.301856 H MutD_14_48.log  |           |           |           |
| 8                                                            | 5.442753  | -0.873496 | -0.051435 |
| 6                                                            | 2.247406  | 1.247950  | 0.003489  |
| 6                                                            | 3.060856  | 0.126765  | -0.009604 |
| 6                                                            | -1.982461 | 1.197543  | 0.027389  |
| 12                                                           | -6.069983 | -0.476512 | -0.071015 |
| 6                                                            | -1.056676 | 2.017375  | 0.021538  |
| 12                                                           | -2.948557 | -0.621312 | 0.026163  |
| 6                                                            | 1.336233  | 2.062430  | 0.011454  |
| 6                                                            | 2.880212  | -1.244940 | -0.009626 |
| 6                                                            | -1.936705 | -2.408167 | 0.046619  |
| 6                                                            | 4.232464  | -0.711815 | -0.033969 |



|                                                              |           |           |           |
|--------------------------------------------------------------|-----------|-----------|-----------|
| 6                                                            | -0.708181 | -2.613291 | 0.039893  |
| 6                                                            | 0.642119  | -2.508126 | 0.028736  |
| 8                                                            | 0.107568  | 4.088273  | 0.006613  |
| 6                                                            | 1.802304  | -2.099024 | 0.009843  |
| 6                                                            | 0.119080  | 2.842580  | 0.013706  |
| 16                                                           |           |           |           |
| 51.376066 Kcal/mol 2.227880 eV -101.301808 H Child_10_50.log |           |           |           |
| 8                                                            | -5.971637 | -1.243969 | -0.113106 |
| 8                                                            | 3.536073  | -2.813068 | 0.401911  |
| 6                                                            | -4.900518 | -0.727099 | -0.069913 |
| 6                                                            | 1.670200  | 2.689966  | 0.073588  |
| 12                                                           | -1.700214 | -1.017374 | -0.070192 |
| 6                                                            | 2.588394  | 1.859716  | -0.004268 |
| 6                                                            | -3.682305 | -0.292076 | -0.032909 |
| 6                                                            | 3.494227  | 0.835323  | -0.154639 |
| 6                                                            | 0.283058  | -1.501620 | -0.056281 |
| 6                                                            | 3.646571  | -0.507154 | -0.129433 |
| 6                                                            | -2.974442 | 0.906049  | 0.053607  |
| 6                                                            | 2.933756  | -1.768275 | 0.104162  |
| 6                                                            | -2.040760 | 1.737753  | 0.120158  |
| 6                                                            | 4.814028  | 0.247433  | -0.492269 |
| 6                                                            | 1.504211  | -1.670617 | 0.003022  |
| 12                                                           | -0.344286 | 2.817366  | 0.170243  |
| 16                                                           |           |           |           |
| 51.533355 Kcal/mol 2.234701 eV -101.301557 H MutD_8_64.log   |           |           |           |
| 8                                                            | -3.821186 | -0.456136 | -0.638562 |
| 6                                                            | 4.060294  | -0.373421 | -0.351818 |
| 6                                                            | 3.883026  | 0.970658  | -0.148529 |
| 6                                                            | 2.087538  | 2.717892  | 0.263552  |
| 8                                                            | -1.893241 | 0.545279  | 0.282191  |
| 6                                                            | 3.227752  | 1.995303  | 0.044264  |
| 12                                                           | -1.000484 | 2.337781  | 0.279583  |
| 6                                                            | -2.938187 | 1.976443  | -0.630461 |
| 6                                                            | 0.901965  | 3.055147  | 0.474959  |
| 6                                                            | 2.488252  | -2.398941 | -0.330532 |
| 6                                                            | -3.221942 | 0.680233  | -0.553070 |
| 12                                                           | -2.366682 | -1.443445 | 0.336941  |
| 6                                                            | 1.443447  | -2.973409 | 0.045704  |
| 6                                                            | 3.343843  | -1.401158 | -0.541321 |
| 6                                                            | -1.071852 | -2.980916 | 0.585983  |
| 6                                                            | 0.149434  | -3.175359 | 0.383381  |
| 16                                                           |           |           |           |
| 51.776036 Kcal/mol 2.245224 eV -101.301170 H MutD_15_48.log  |           |           |           |
| 6                                                            | 2.860697  | -1.219785 | 0.049175  |
| 6                                                            | 3.005919  | 0.154410  | 0.106644  |
| 6                                                            | 4.177262  | -0.656744 | 0.297881  |
| 6                                                            | -1.909972 | -2.477584 | -0.450133 |
| 6                                                            | 2.182409  | 1.264404  | 0.031796  |
| 8                                                            | 0.011707  | 4.083180  | -0.114364 |
| 12                                                           | -5.823633 | -0.442665 | 0.795078  |
| 6                                                            | -1.106112 | 1.990385  | -0.246507 |
| 6                                                            | -2.010350 | 1.150351  | -0.326153 |
| 6                                                            | -0.676572 | -2.642283 | -0.372110 |
| 6                                                            | 1.813115  | -2.094819 | -0.103059 |
| 6                                                            | 0.665001  | -2.515266 | -0.242384 |

|                                                              |           |           |           |
|--------------------------------------------------------------|-----------|-----------|-----------|
| 6                                                            | 0.047279  | 2.838720  | -0.135833 |
| 6                                                            | 1.271377  | 2.076433  | -0.043258 |
| 12                                                           | -2.925966 | -0.694142 | -0.354093 |
| 8                                                            | 5.372650  | -0.779136 | 0.528342  |
| 16                                                           |           |           |           |
| 52.189789 Kcal/mol 2.263166 eV -101.300511 H Child_13_25.log |           |           |           |
| 8                                                            | -5.299236 | 1.283414  | 0.502813  |
| 6                                                            | 1.923161  | -1.526200 | -0.052659 |
| 6                                                            | -4.139795 | 1.002399  | 0.235757  |
| 6                                                            | 0.910477  | -2.236426 | -0.065504 |
| 6                                                            | -2.782735 | 1.423212  | -0.068729 |
| 8                                                            | -0.512391 | -4.141163 | -0.097468 |
| 6                                                            | -1.634932 | 2.169571  | -0.233719 |
| 12                                                           | 3.024610  | 0.212585  | -0.097664 |
| 6                                                            | -0.434658 | 2.429490  | -0.307415 |
| 6                                                            | -3.065490 | 0.069689  | 0.021194  |
| 6                                                            | -0.359955 | -2.908920 | -0.064627 |
| 12                                                           | 6.025721  | 0.811609  | 0.455205  |
| 6                                                            | 2.118702  | 2.048332  | -0.330512 |
| 6                                                            | -2.328153 | -1.105932 | -0.005522 |
| 6                                                            | -1.476787 | -1.980753 | -0.042794 |
| 6                                                            | 0.918339  | 2.377483  | -0.341013 |
| 16                                                           |           |           |           |
| 52.422381 Kcal/mol 2.273252 eV -101.300140 H Child_12_35.log |           |           |           |
| 8                                                            | 6.078923  | 0.691097  | -0.459097 |
| 6                                                            | -5.084611 | -0.486441 | -2.127803 |
| 6                                                            | 5.060004  | 0.102396  | -0.317999 |
| 8                                                            | -4.589204 | -0.508450 | -1.084457 |
| 6                                                            | 3.822830  | -0.321812 | -0.183925 |
| 6                                                            | -1.953661 | -1.715915 | 0.818172  |
| 6                                                            | 3.174863  | -1.542588 | 0.026225  |
| 12                                                           | -3.404799 | -0.267307 | 0.724206  |
| 12                                                           | 2.044852  | 0.832109  | -0.190308 |
| 6                                                            | -3.341512 | 1.773668  | 0.859064  |
| 6                                                            | 1.814338  | -1.611479 | 0.158264  |
| 6                                                            | -0.719585 | -1.842785 | 0.659140  |
| 6                                                            | 0.357354  | 1.927350  | -0.063620 |
| 6                                                            | -2.162682 | 2.058827  | 0.544331  |
| 6                                                            | 0.601591  | -1.826945 | 0.402109  |
| 6                                                            | -0.835328 | 2.112592  | 0.216317  |
| 16                                                           |           |           |           |
| 53.198924 Kcal/mol 2.306927 eV -101.298903 H Child_5_27.log  |           |           |           |
| 6                                                            | -4.300582 | -0.023726 | -0.281221 |
| 8                                                            | 5.035781  | -1.780338 | -0.399269 |
| 6                                                            | -3.631297 | 1.048925  | -0.291591 |
| 6                                                            | 3.977848  | -1.262212 | -0.255891 |
| 12                                                           | -3.773751 | -1.940820 | 0.163204  |
| 6                                                            | 2.755372  | -0.826537 | -0.093744 |
| 6                                                            | -0.291452 | 2.803375  | -0.249719 |
| 6                                                            | 2.247748  | 0.473505  | -0.040511 |
| 6                                                            | -2.681863 | 1.955975  | -0.465107 |
| 12                                                           | 1.119527  | -2.122446 | 0.165403  |
| 6                                                            | -1.515843 | 2.466655  | -0.266347 |
| 6                                                            | 1.714107  | 1.576234  | 0.032979  |
| 6                                                            | -2.024978 | -2.924015 | 0.298710  |

|           |           |           |                                |
|-----------|-----------|-----------|--------------------------------|
| 6         | -0.786490 | -2.760432 | 0.322270                       |
| 8         | 1.567250  | 3.854653  | 0.721054                       |
| 6         | 1.041838  | 2.833033  | 0.203911                       |
| 16        |           |           |                                |
| 53.484239 | Kcal/mol  | 2.319299  | eV -101.298448 H Child_6_8.log |
| 8         | 4.497630  | 1.511732  | 0.263851                       |
| 6         | -4.021749 | -1.456538 | 0.211702                       |
| 6         | 0.342746  | 2.059443  | -0.400845                      |
| 6         | -2.830344 | -2.012219 | -0.106232                      |
| 6         | 1.365482  | 1.357266  | -0.342870                      |
| 6         | -4.945308 | -0.665389 | 0.520982                       |
| 6         | 3.751679  | 0.582623  | 0.166945                       |
| 6         | -1.631165 | -2.148913 | -0.362855                      |
| 12        | -1.690267 | 2.392500  | -0.226875                      |
| 6         | -0.303774 | -1.970263 | -0.465986                      |
| 6         | 2.339344  | 0.365262  | -0.188724                      |
| 6         | 0.860198  | -1.573989 | -0.419086                      |
| 6         | 3.311302  | -1.795620 | 0.280146                       |
| 12        | -4.286572 | 1.309067  | 0.329276                       |
| 6         | 2.093554  | -0.993919 | -0.188145                      |
| 8         | 4.218656  | -0.874889 | 0.553773                       |
| 16        |           |           |                                |
| 53.685921 | Kcal/mol  | 2.328045  | eV -101.298127 H MutD_5_66.log |
| 12        | -4.386032 | 1.229129  | 0.037259                       |
| 8         | 3.279174  | 2.081095  | 0.326637                       |
| 6         | 2.574328  | 1.095008  | 0.082905                       |
| 6         | 2.327440  | -1.434920 | -0.075318                      |
| 6         | -2.779366 | -2.080502 | -0.042282                      |
| 6         | -1.472723 | 1.866048  | -0.254484                      |
| 6         | -2.669578 | 2.227457  | -0.267444                      |
| 6         | -1.519201 | -2.016793 | -0.141841                      |
| 6         | -0.223377 | -1.856252 | -0.147069                      |
| 6         | 1.025446  | -1.553156 | -0.117299                      |
| 6         | 4.516883  | -0.453206 | 0.039430                       |
| 6         | 3.178566  | -0.338218 | -0.004399                      |
| 6         | -3.939986 | -1.424869 | 0.262878                       |
| 6         | -4.982751 | -0.720807 | 0.362925                       |
| 12        | 0.394006  | 1.052670  | -0.131270                      |
| 8         | 5.682105  | -0.486135 | 0.040877                       |
| 16        |           |           |                                |
| 53.830097 | Kcal/mol  | 2.334297  | eV -101.297897 H MutD_5_64.log |
| 6         | 4.030993  | -0.406450 | 0.245414                       |
| 6         | -3.658677 | 1.772368  | 0.258115                       |
| 6         | 1.852809  | 2.693547  | 0.150379                       |
| 6         | -2.881703 | -1.615440 | 0.146439                       |
| 12        | -0.150930 | 2.380351  | -0.182463                      |
| 6         | 0.082821  | -1.857675 | -0.279496                      |
| 6         | 2.798209  | 1.885114  | 0.217326                       |
| 6         | 1.030760  | -2.646985 | -0.150700                      |
| 6         | -2.656495 | 0.769359  | 0.070975                       |
| 6         | 3.555972  | 0.746046  | 0.247873                       |
| 8         | -0.026135 | 0.415126  | -0.565369                      |
| 8         | -3.637912 | -2.484047 | 0.324449                       |
| 12        | 3.016712  | -2.114768 | 0.047950                       |
| 6         | -2.090670 | -0.542936 | -0.046220                      |

|           |           |           |                                 |
|-----------|-----------|-----------|---------------------------------|
| 6         | -2.234733 | 2.084513  | 0.059828                        |
| 6         | -0.675453 | -0.654066 | -0.329681                       |
| 16        |           |           |                                 |
| 54.091780 | Kcal/mol  | 2.345645  | eV -101.297480 H MutD_14_72.log |
| 6         | 2.436697  | 0.048801  | -0.306143                       |
| 6         | 2.282509  | 1.428915  | -0.288626                       |
| 8         | -0.306190 | -2.251420 | 0.842634                        |
| 6         | 1.861922  | 2.593321  | -0.177641                       |
| 6         | -2.751524 | -0.442022 | -0.698433                       |
| 8         | 3.999175  | -2.003488 | -0.067963                       |
| 12        | 0.066491  | 3.481685  | 0.190842                        |
| 12        | -2.043649 | -2.677254 | 0.234568                        |
| 6         | 0.204483  | -1.133496 | 0.238608                        |
| 6         | -1.916100 | 3.083193  | 0.432223                        |
| 6         | 3.021481  | -1.272478 | -0.150476                       |
| 6         | -1.778818 | 0.498907  | -0.193894                       |
| 6         | -3.357441 | -1.533987 | -0.849004                       |
| 6         | -1.999395 | 1.864704  | 0.157632                        |
| 6         | -0.576785 | -0.046166 | 0.053083                        |
| 6         | 1.603308  | -1.025344 | -0.101043                       |
| 16        |           |           |                                 |
| 54.387945 | Kcal/mol  | 2.358487  | eV -101.297008 H Child_4_45.log |
| 12        | -3.112941 | 2.019384  | -0.107236                       |
| 6         | 3.636083  | -1.581822 | -0.621480                       |
| 6         | -3.441772 | -0.837107 | -0.493554                       |
| 8         | 3.363138  | 2.638437  | -0.543136                       |
| 6         | -3.997791 | 0.279242  | -0.522791                       |
| 6         | 2.701920  | 1.726298  | -0.243391                       |
| 6         | -2.615178 | -1.919957 | -0.379534                       |
| 6         | 2.630168  | -0.663105 | -0.193036                       |
| 6         | -1.162563 | 2.488260  | 0.358972                        |
| 6         | 2.307602  | -2.007729 | -0.157537                       |
| 6         | -1.658327 | -2.687163 | -0.174233                       |
| 6         | 2.021281  | 0.606933  | 0.066672                        |
| 6         | -0.166810 | 1.778728  | 0.569556                        |
| 6         | 0.675665  | 0.635833  | 0.608862                        |
| 12        | 0.294303  | -2.378483 | 0.386042                        |
| 8         | 0.167109  | -0.463595 | 1.011048                        |
| 16        |           |           |                                 |
| 54.778014 | Kcal/mol  | 2.375403  | eV -101.296386 H MutD_14_40.log |
| 6         | -0.215188 | -1.026506 | 0.006034                        |
| 6         | 1.084053  | -0.923847 | -0.070912                       |
| 8         | 1.429266  | 2.173772  | 0.549251                        |
| 6         | 2.364544  | -0.845247 | -0.069674                       |
| 6         | -3.615281 | 2.119145  | -0.366912                       |
| 6         | -5.248350 | -1.268052 | 0.081775                        |
| 6         | 6.158112  | -0.219383 | -0.103391                       |
| 6         | 0.449889  | 1.668870  | 0.198364                        |
| 6         | -1.503668 | -0.952000 | 0.090301                        |
| 8         | 7.332644  | -0.014141 | -0.125937                       |
| 6         | -4.451978 | 1.190655  | -0.267138                       |
| 6         | 3.629855  | -0.644821 | -0.074747                       |
| 12        | -1.785821 | 1.209127  | -0.077124                       |
| 6         | -5.030081 | -0.046037 | -0.109264                       |
| 6         | 4.903669  | -0.457069 | -0.074898                       |

|           |           |           |           |                                   |
|-----------|-----------|-----------|-----------|-----------------------------------|
| 12        | -3.318240 | -1.946734 | 0.175146  |                                   |
| 16        |           |           |           |                                   |
| 54.987847 | Kcal/mol  | 2.384502  | eV        | -101.296052 H Child_10_12.log     |
| 6         | -2.911737 | 0.942586  | 0.181689  |                                   |
| 6         | 2.682839  | -0.518366 | -1.821772 |                                   |
| 6         | -1.864951 | 1.600260  | 0.221749  |                                   |
| 6         | 2.176984  | -0.962629 | -0.663375 |                                   |
| 12        | -2.074802 | -1.277344 | 0.566570  |                                   |
| 6         | 1.012738  | -1.439423 | -0.056251 |                                   |
| 6         | -0.624269 | 2.145951  | 0.193636  |                                   |
| 6         | -0.107939 | -1.711203 | 0.394651  |                                   |
| 6         | 0.583323  | 2.431662  | 0.199977  |                                   |
| 6         | 3.391735  | -0.195254 | -0.131107 |                                   |
| 6         | -3.806040 | -0.123605 | 0.192865  |                                   |
| 8         | -6.151036 | -0.607740 | -0.492873 |                                   |
| 8         | 5.639119  | -0.846733 | 0.716318  |                                   |
| 6         | -5.044069 | -0.328739 | -0.160921 |                                   |
| 6         | 4.562964  | -0.605704 | 0.287888  |                                   |
| 12        | 2.390291  | 1.629224  | -0.135048 |                                   |
| 16        |           |           |           |                                   |
| 55.295560 | Kcal/mol  | 2.397845  | eV        | -101.295561 H Original2D_13_1.log |
| 6         | 0.090929  | 1.892110  | -0.000000 |                                   |
| 6         | -1.826407 | -1.496278 | 0.000000  |                                   |
| 6         | -0.736610 | -0.790617 | 0.000000  |                                   |
| 6         | 1.417167  | 2.446230  | -0.000000 |                                   |
| 6         | 0.721624  | -0.691820 | -0.000000 |                                   |
| 6         | 2.643495  | 2.629043  | -0.000000 |                                   |
| 6         | -0.000000 | 0.458375  | -0.000000 |                                   |
| 12        | 2.717897  | -1.107498 | -0.000000 |                                   |
| 6         | -1.015777 | 2.657142  | -0.000000 |                                   |
| 8         | -1.957063 | 3.354117  | -0.000000 |                                   |
| 6         | -4.093195 | -2.676823 | 0.000000  |                                   |
| 6         | -2.989289 | -2.037452 | 0.000000  |                                   |
| 8         | 4.318158  | -0.267080 | -0.000000 |                                   |
| 12        | 4.357529  | 1.545179  | -0.000000 |                                   |
| 6         | -5.190985 | -3.374317 | 0.000000  |                                   |
| 6         | -6.319933 | -4.007003 | 0.000000  |                                   |
| 16        |           |           |           |                                   |
| 55.501701 | Kcal/mol  | 2.406785  | eV        | -101.295233 H Child_1_62.log      |
| 12        | 3.260922  | -0.574309 | -0.283277 |                                   |
| 8         | -4.677923 | -0.391435 | -0.069841 |                                   |
| 6         | 2.309022  | 1.232234  | 0.211185  |                                   |
| 6         | -3.506513 | -0.525693 | -0.043647 |                                   |
| 12        | 1.106100  | 2.853321  | -0.330606 |                                   |
| 6         | -2.182790 | -0.637235 | -0.036906 |                                   |
| 8         | 2.195759  | -2.206475 | -0.465947 |                                   |
| 6         | -1.443934 | -1.804227 | -0.414361 |                                   |
| 6         | 1.360691  | 0.452323  | 0.807056  |                                   |
| 6         | -1.254472 | 0.471108  | 0.386845  |                                   |
| 6         | 0.996333  | -1.972483 | 0.060223  |                                   |
| 6         | -0.294479 | -2.273118 | -0.451961 |                                   |
| 6         | 0.880547  | -0.941616 | 1.006977  |                                   |
| 6         | -0.952437 | 2.972439  | -0.450028 |                                   |
| 6         | -0.068744 | 0.123477  | 0.971977  |                                   |
| 6         | -1.267716 | 1.808648  | -0.105209 |                                   |

16  
55.528004 Kcal/mol 2.407925 eV -101.295191 H Child\_2\_60.log  
6 -1.115412 2.197551 -0.499080  
6 7.706020 -1.646940 -1.171682  
6 -5.157447 -2.935444 -0.207838  
6 6.771110 -0.996349 -0.590618  
8 -4.961965 -1.932839 -0.782711  
6 5.730703 -0.404008 -0.086742  
6 -2.440055 2.172554 -0.810420  
6 4.642764 0.093607 0.321532  
6 -0.016238 1.801006 -0.057238  
6 3.423063 0.499071 0.527596  
6 -3.642805 1.842569 -0.986760  
6 2.199366 0.826673 0.606776  
6 0.877164 0.951170 0.588096  
12 -0.755956 -0.317392 1.210252  
12 -3.777613 -0.040032 -0.103845  
8 -2.471356 -0.832120 0.897885

16  
55.549079 Kcal/mol 2.408839 eV -101.295157 H Child\_9\_12.log  
8 -4.918220 -1.160183 -0.959556  
6 1.776909 0.974880 0.843148  
6 -3.849026 -0.951790 -0.474880  
6 1.436591 1.847189 -0.113001  
6 -2.722944 -0.574188 0.059826  
8 2.083500 0.023628 1.507380  
6 -1.532651 -1.250886 0.408788  
6 2.183857 1.400575 -1.277525  
6 -0.412771 -1.666277 0.750851  
6 2.772599 0.339700 -1.570577  
12 1.574418 -2.043562 0.806680  
6 3.039715 -0.977860 -1.368034  
12 -2.226098 1.434566 0.326946  
6 0.250795 2.601499 0.053835  
6 -0.892289 2.994991 0.356464  
6 3.032203 -2.004434 -0.666578

16  
55.570443 Kcal/mol 2.409766 eV -101.295123 H MutD\_17\_76.log  
12 2.923131 -1.163860 0.648552  
8 -4.999796 -0.298849 -0.687433  
6 -1.671752 1.432668 0.057892  
12 3.127683 -0.207061 -2.399670  
6 0.702336 -2.872952 0.650660  
6 1.589675 1.785696 0.679345  
6 -1.652401 -1.956796 0.205725  
6 -0.713413 2.173656 0.218228  
6 0.578610 2.781654 0.454838  
6 -3.819811 -0.286987 -0.368768  
6 2.342808 0.808177 0.790912  
6 -0.591769 -2.537770 0.428954  
6 -2.588876 0.407084 -0.096889  
8 0.779793 4.009798 0.437526  
6 1.933572 -2.966117 0.845620  
6 -2.583936 -0.974404 -0.031072

16

57.037849 Kcal/mol 2.473398 eV -101.292785 H Child\_11\_48.log

|    |           |           |           |
|----|-----------|-----------|-----------|
| 12 | -1.121858 | 2.988484  | -1.291350 |
| 6  | 1.876218  | 0.706895  | 1.362742  |
| 8  | -8.192101 | -2.449632 | -0.015984 |
| 6  | 3.061287  | 0.390299  | 1.079441  |
| 6  | -7.190405 | -1.799787 | -0.132362 |
| 6  | 5.389959  | -0.448790 | 0.317990  |
| 6  | -6.114876 | -1.145941 | -0.281789 |
| 6  | 4.284903  | 0.009408  | 0.737273  |
| 6  | -5.055704 | -0.408980 | -0.262862 |
| 6  | 6.533781  | -0.875117 | -0.146398 |
| 6  | -3.965347 | 0.236913  | -0.247062 |
| 8  | 8.627299  | -1.751889 | -1.118636 |
| 6  | -2.854630 | 0.895833  | -0.074586 |
| 6  | 7.600539  | -1.325797 | -0.638554 |
| 6  | -1.731165 | 1.505049  | 0.073768  |
| 12 | -0.085554 | 0.942538  | 1.153962  |

16

57.085796 Kcal/mol 2.475478 eV -101.292709 H Child\_4\_15.log

|    |           |           |           |
|----|-----------|-----------|-----------|
| 6  | -3.547273 | 2.376375  | 0.091661  |
| 8  | 1.830489  | -2.898990 | 0.066303  |
| 6  | -2.356669 | 1.969242  | 0.062260  |
| 6  | 2.428990  | -1.735073 | 0.064075  |
| 12 | -4.334955 | 0.512283  | -0.038028 |
| 12 | -0.032585 | -2.878172 | -0.017322 |
| 8  | 4.710156  | 2.390901  | -0.096192 |
| 6  | 2.864936  | -0.593126 | 0.035204  |
| 6  | -2.890388 | -0.996385 | -0.065682 |
| 6  | 1.389049  | 1.316143  | 0.040280  |
| 6  | 3.783694  | 1.656284  | -0.041490 |
| 6  | -1.223184 | 1.082689  | 0.021130  |
| 6  | -1.682936 | -1.656540 | -0.081924 |
| 6  | -1.655102 | -0.209450 | -0.039215 |
| 6  | 2.735653  | 0.835126  | 0.019596  |
| 6  | 0.167448  | 1.363948  | 0.044656  |

16

57.181734 Kcal/mol 2.479638 eV -101.292556 H Child\_1\_42.log

|    |           |           |           |
|----|-----------|-----------|-----------|
| 8  | -8.469227 | -0.240364 | -0.566692 |
| 12 | 4.317968  | -0.133461 | -0.561797 |
| 6  | -7.304977 | -0.342932 | -0.302741 |
| 8  | 6.061065  | -1.626546 | -0.268335 |
| 6  | -6.069456 | -0.480295 | -0.030907 |
| 6  | 2.562950  | -1.147705 | -0.079290 |
| 6  | -4.796768 | -0.482670 | 0.186299  |
| 6  | 6.535181  | -2.455777 | 0.396994  |
| 6  | -3.538541 | -0.472082 | 0.356167  |
| 12 | 3.305365  | 2.497829  | -0.275760 |
| 6  | -2.248386 | -0.331867 | 0.432836  |
| 6  | 0.754827  | 1.531829  | 0.420865  |
| 6  | -0.998143 | -0.170141 | 0.448832  |
| 6  | 1.336447  | 2.639590  | 0.421159  |
| 6  | 0.309592  | 0.175405  | 0.375022  |
| 6  | 1.421491  | -0.702878 | 0.163248  |

16

57.337476 Kcal/mol 2.486391 eV -101.292307 H MutI\_16\_51.log

|    |                                                              |           |           |
|----|--------------------------------------------------------------|-----------|-----------|
| 6  | 3.352525                                                     | 0.295609  | 0.750623  |
| 8  | 2.273662                                                     | 3.224699  | -0.761795 |
| 6  | -4.832283                                                    | 0.009273  | 0.461128  |
| 6  | 0.893579                                                     | -1.367574 | -0.385978 |
| 6  | -3.981519                                                    | -0.799785 | -0.031981 |
| 6  | 2.251210                                                     | 2.112922  | -0.372106 |
| 6  | -0.273772                                                    | 0.683564  | 0.002243  |
| 6  | 3.173156                                                     | -1.937202 | 0.324579  |
| 6  | 2.202918                                                     | 0.871110  | 0.122786  |
| 12 | -3.373866                                                    | 1.452670  | 0.479173  |
| 12 | -2.036348                                                    | -1.353983 | -0.409625 |
| 6  | 2.082920                                                     | -2.166971 | -0.202521 |
| 6  | -1.388149                                                    | 1.241571  | 0.123118  |
| 6  | 3.717722                                                     | -0.873227 | 1.024808  |
| 6  | 0.964995                                                     | 0.020012  | -0.111942 |
| 8  | -0.280817                                                    | -1.939707 | -0.621096 |
| 16 | 57.689566 Kcal/mol 2.501659 eV -101.291746 H MutD_8_66.log   |           |           |
| 6  | 1.369100                                                     | -2.248236 | -0.118935 |
| 6  | 2.695282                                                     | -2.339032 | -0.081636 |
| 6  | -1.116655                                                    | 1.525958  | -0.111860 |
| 8  | -6.588594                                                    | -0.898331 | 0.254159  |
| 8  | 3.670620                                                     | 1.223713  | 0.151725  |
| 6  | -0.862217                                                    | -0.976178 | -0.120063 |
| 6  | 0.032698                                                     | 2.269488  | -0.088692 |
| 6  | 0.280309                                                     | -1.566039 | -0.120542 |
| 6  | -4.196794                                                    | -0.372274 | -0.045732 |
| 6  | -5.441173                                                    | -0.654871 | 0.099562  |
| 6  | 3.967188                                                     | -2.445922 | -0.005922 |
| 6  | -1.272066                                                    | 2.954327  | -0.119303 |
| 6  | -1.626251                                                    | 0.180607  | -0.112082 |
| 12 | 2.087922                                                     | 2.076681  | 0.043156  |
| 6  | -2.967146                                                    | -0.099640 | -0.089974 |
| 12 | 4.426256                                                     | -0.407697 | 0.143844  |
| 16 | 57.924903 Kcal/mol 2.511865 eV -101.291371 H Child_15_20.log |           |           |
| 8  | -5.530269                                                    | 0.897647  | 0.241130  |
| 8  | 4.263112                                                     | -0.665340 | 0.425320  |
| 6  | -4.355131                                                    | 0.566487  | 0.194892  |
| 6  | 3.126201                                                     | -0.855185 | -0.125228 |
| 6  | -2.947608                                                    | 0.886247  | 0.039835  |
| 6  | 1.939779                                                     | -1.539347 | -0.398506 |
| 6  | -1.786334                                                    | 1.612403  | -0.145998 |
| 6  | 0.869512                                                     | -2.396714 | -0.249914 |
| 6  | -3.324225                                                    | -0.440078 | 0.195360  |
| 6  | -0.313364                                                    | -2.647165 | -0.010590 |
| 6  | -0.644479                                                    | 2.066650  | -0.328340 |
| 6  | 2.062305                                                     | -0.173960 | -0.775225 |
| 6  | -2.619882                                                    | -1.630578 | 0.217788  |
| 6  | -1.626018                                                    | -2.352090 | 0.125214  |
| 12 | 4.229407                                                     | 1.428108  | 0.664096  |
| 12 | 1.424986                                                     | 1.868684  | -0.478041 |
| 16 | 58.319843 Kcal/mol 2.528991 eV -101.290742 H MutD_15_40.log  |           |           |
| 6  | 1.065504                                                     | -2.795900 | 0.356253  |



|                                                              |           |           |           |
|--------------------------------------------------------------|-----------|-----------|-----------|
| 12                                                           | 2.398418  | 1.514636  | -0.013163 |
| 6                                                            | 0.106017  | 2.457423  | -0.050484 |
| 6                                                            | -1.409146 | 0.475029  | 0.545999  |
| 8                                                            | -6.087182 | -0.702022 | -0.808667 |
| 6                                                            | -4.983102 | -0.372666 | -0.540999 |
| 6                                                            | 3.106212  | -1.428569 | -0.621701 |
| 6                                                            | -0.254795 | 1.224627  | 0.512947  |
| 12                                                           | -0.024336 | -1.242207 | 1.079046  |
| 6                                                            | 0.992713  | 3.263881  | -0.447778 |
| 6                                                            | -3.795631 | -0.015281 | -0.232774 |
| 8                                                            | 0.860426  | 0.565415  | 0.987397  |
| 6                                                            | -2.613478 | 0.280748  | 0.128259  |
| 6                                                            | 2.046709  | -2.197626 | -0.171485 |
| 6                                                            | 3.529343  | -0.109901 | -0.684448 |
| 6                                                            | 4.430498  | -1.144480 | -1.163863 |
| 16                                                           |           |           |           |
| 58.586103 Kcal/mol 2.540537 eV -101.290318 H MutI_10_71.log  |           |           |           |
| 6                                                            | -3.507699 | 1.268706  | -0.273669 |
| 6                                                            | 2.541837  | 1.551654  | 0.115486  |
| 12                                                           | -2.595206 | 3.024167  | 0.125059  |
| 6                                                            | -2.802082 | -2.304414 | -0.330836 |
| 6                                                            | 2.403323  | -1.772315 | 0.161110  |
| 6                                                            | 3.483010  | 0.561178  | -0.359702 |
| 6                                                            | 1.617059  | 2.315786  | 0.373490  |
| 8                                                            | 4.509898  | 0.887024  | -0.991503 |
| 12                                                           | -0.148032 | -3.148460 | 0.557741  |
| 8                                                            | 1.653139  | -2.780031 | 0.427550  |
| 6                                                            | -0.680576 | 3.513166  | 0.517805  |
| 6                                                            | 0.454299  | 3.010509  | 0.519920  |
| 6                                                            | 3.050737  | -0.768164 | -0.097185 |
| 6                                                            | -3.596780 | 0.038664  | -0.527575 |
| 6                                                            | -2.097181 | -3.349978 | -0.088393 |
| 6                                                            | -3.596853 | -1.292194 | -0.624115 |
| 16                                                           |           |           |           |
| 58.754465 Kcal/mol 2.547838 eV -101.290049 H Child_11_23.log |           |           |           |
| 12                                                           | -2.080983 | 2.981101  | -0.306559 |
| 6                                                            | 6.383789  | -0.508472 | -0.021899 |
| 6                                                            | -3.911215 | 2.310758  | 0.284798  |
| 6                                                            | 5.110259  | -0.578862 | -0.058929 |
| 6                                                            | -3.679962 | 1.113809  | 0.575103  |
| 8                                                            | 7.583532  | -0.470609 | 0.059442  |
| 6                                                            | 0.564405  | 1.217765  | -0.374793 |
| 6                                                            | 3.839101  | -0.345787 | -0.121953 |
| 6                                                            | -3.157345 | -0.132498 | 0.799031  |
| 6                                                            | -4.792123 | -3.265890 | -0.097294 |
| 6                                                            | 1.264813  | 0.019592  | -0.108792 |
| 6                                                            | 2.585027  | -0.151753 | -0.119895 |
| 6                                                            | -0.248689 | 2.146170  | -0.546886 |
| 12                                                           | -0.390469 | -1.213848 | 0.440859  |
| 6                                                            | -2.368497 | -1.093489 | 0.876474  |
| 8                                                            | -5.068526 | -2.728778 | -1.074618 |
| 16                                                           |           |           |           |
| 59.016662 Kcal/mol 2.559208 eV -101.289631 H MutI_13_39.log  |           |           |           |
| 12                                                           | 3.200422  | 1.312647  | 0.090019  |
| 6                                                            | -0.968897 | 1.407607  | -0.113781 |

|           |           |           |                                 |
|-----------|-----------|-----------|---------------------------------|
| 6         | -0.006486 | -0.856659 | -0.063100                       |
| 6         | -1.316880 | -1.384287 | 0.029315                        |
| 6         | 3.686449  | -1.506558 | -0.079791                       |
| 6         | -3.495443 | 1.435396  | -0.055389                       |
| 8         | 1.389939  | 1.199036  | -0.003271                       |
| 6         | 4.584816  | -0.489063 | 0.023686                        |
| 6         | 1.116049  | -1.572625 | -0.120372                       |
| 12        | -4.337797 | -1.019363 | 0.089262                        |
| 6         | 5.217547  | 0.617658  | 0.161086                        |
| 6         | -2.496800 | -1.748020 | 0.144509                        |
| 6         | 0.150461  | 0.714028  | -0.059303                       |
| 8         | -4.651597 | 0.880828  | 0.018127                        |
| 6         | -2.266583 | 1.632644  | -0.105311                       |
| 6         | 2.419395  | -1.609842 | -0.139917                       |
| 16        |           |           |                                 |
| 59.190855 | Kcal/mol  | 2.566762  | eV -101.289354 H MutD_13_44.log |
| 6         | 2.360939  | 2.914889  | -0.362033                       |
| 8         | -8.019873 | 0.080150  | -0.106433                       |
| 6         | 3.989526  | -2.577165 | -0.748294                       |
| 6         | 4.533100  | -0.320843 | 0.442309                        |
| 6         | -5.551060 | 0.019822  | 0.049681                        |
| 6         | -6.821333 | 0.038092  | -0.036108                       |
| 8         | 2.719191  | 3.726698  | -1.080838                       |
| 6         | -2.992913 | -0.179699 | 0.109694                        |
| 6         | -0.434781 | -0.477625 | 0.160703                        |
| 6         | -1.716379 | -0.333752 | 0.134456                        |
| 12        | 1.976731  | -2.252043 | -0.506741                       |
| 6         | 4.424320  | -1.531620 | -0.198615                       |
| 6         | -4.264631 | -0.064097 | 0.076158                        |
| 12        | 2.222539  | 0.893299  | 0.863431                        |
| 6         | 4.274663  | 0.749499  | 1.046543                        |
| 6         | 0.867583  | -0.595809 | 0.195154                        |
| 16        |           |           |                                 |
| 59.266588 | Kcal/mol  | 2.570046  | eV -101.289233 H Child_7_55.log |
| 6         | 2.300696  | 1.409526  | -0.269389                       |
| 6         | -4.518024 | -0.853402 | 0.457784                        |
| 6         | -2.769051 | 2.389560  | -0.687805                       |
| 6         | -3.916112 | 0.186615  | 0.081041                        |
| 6         | 3.084538  | 0.460077  | -0.357697                       |
| 6         | -1.065203 | -2.766943 | -0.021111                       |
| 12        | -0.744108 | 2.462366  | -0.367651                       |
| 12        | -2.987613 | -2.216844 | 0.336158                        |
| 6         | -3.356499 | 1.337379  | -0.324293                       |
| 6         | 0.166552  | -2.642855 | -0.146030                       |
| 6         | 3.653988  | -0.856397 | -0.160268                       |
| 6         | 1.480215  | -2.307044 | -0.233666                       |
| 6         | 1.329148  | 2.360336  | 0.127895                        |
| 6         | 2.601089  | -1.819365 | -0.306303                       |
| 8         | 1.563898  | 3.054619  | 1.157134                        |
| 8         | 4.790181  | -1.096019 | 0.269987                        |
| 16        |           |           |                                 |
| 59.705757 | Kcal/mol  | 2.589090  | eV -101.288533 H MutD_12_78.log |
| 6         | -1.356876 | -1.454305 | 0.387253                        |
| 6         | 3.392064  | -0.286470 | -0.128142                       |
| 6         | -4.512962 | 0.906649  | -0.401894                       |

|                                                             |           |           |           |
|-------------------------------------------------------------|-----------|-----------|-----------|
| 6                                                           | 1.182683  | -1.549235 | 0.233741  |
| 6                                                           | 4.714039  | -0.271365 | -0.091356 |
| 6                                                           | 2.405148  | -1.176049 | 0.131852  |
| 6                                                           | -3.325263 | -1.255463 | -1.001879 |
| 8                                                           | 5.866730  | -0.048611 | -0.171731 |
| 6                                                           | -0.851065 | 2.237024  | 0.199028  |
| 8                                                           | -1.782438 | -0.556714 | 1.247538  |
| 12                                                          | -2.579807 | 1.188966  | 0.654354  |
| 6                                                           | -0.044697 | -1.858438 | 0.434418  |
| 6                                                           | -2.290086 | -1.838537 | -0.634027 |
| 12                                                          | 2.109354  | 1.433217  | -0.402973 |
| 6                                                           | -4.167750 | -0.193288 | -0.917801 |
| 6                                                           | 0.349947  | 2.302212  | -0.148365 |
| 16                                                          |           |           |           |
| 59.937069 Kcal/mol 2.599121 eV -101.288165 H MutD_7_66.log  |           |           |           |
| 8                                                           | -0.187839 | -2.302476 | 0.028544  |
| 8                                                           | 6.599528  | -0.069908 | -0.102315 |
| 6                                                           | 0.824968  | 1.838616  | 0.064066  |
| 12                                                          | -1.056029 | 2.636077  | 0.026146  |
| 6                                                           | 2.817679  | 0.099677  | 0.044550  |
| 6                                                           | -3.863689 | -1.197249 | -0.030382 |
| 6                                                           | 5.399184  | 0.032394  | -0.052523 |
| 12                                                          | 1.484865  | -1.550450 | 0.067306  |
| 6                                                           | -3.778874 | 1.353804  | -0.035091 |
| 6                                                           | -1.452718 | -2.098798 | 0.007390  |
| 6                                                           | -2.653581 | -1.850237 | -0.012003 |
| 6                                                           | -4.331074 | 0.086724  | -0.040594 |
| 6                                                           | 4.139913  | 0.239050  | -0.009232 |
| 6                                                           | 1.842597  | 1.121725  | 0.055667  |
| 6                                                           | -3.041427 | 2.355381  | -0.030910 |
| 6                                                           | -5.309568 | -0.989163 | -0.049480 |
| 16                                                          |           |           |           |
| 59.969286 Kcal/mol 2.600518 eV -101.288113 H MutD_6_74.log  |           |           |           |
| 12                                                          | -1.507028 | -1.568861 | -0.095590 |
| 6                                                           | -2.811057 | 0.107442  | -0.054196 |
| 8                                                           | -6.581946 | -0.031348 | 0.153288  |
| 6                                                           | -5.385607 | 0.054645  | 0.080351  |
| 6                                                           | -0.787447 | 1.810697  | -0.074722 |
| 6                                                           | 3.834858  | -1.201449 | 0.054783  |
| 6                                                           | -4.128400 | 0.286398  | 0.011513  |
| 8                                                           | 0.166151  | -2.328378 | -0.069011 |
| 6                                                           | 3.778248  | 1.355633  | 0.040609  |
| 6                                                           | 4.308784  | 0.080303  | 0.066748  |
| 6                                                           | -1.816278 | 1.108374  | -0.070873 |
| 6                                                           | 1.425583  | -2.103512 | -0.025470 |
| 6                                                           | 5.279839  | -0.999853 | 0.117757  |
| 6                                                           | 2.626869  | -1.857946 | 0.009763  |
| 6                                                           | 3.074926  | 2.381740  | 0.017351  |
| 12                                                          | 1.084065  | 2.630775  | -0.047401 |
| 16                                                          |           |           |           |
| 60.004694 Kcal/mol 2.602053 eV -101.288057 H Child_7_18.log |           |           |           |
| 6                                                           | 0.905734  | -2.662869 | 0.004894  |
| 12                                                          | -1.802042 | 2.708266  | -0.001675 |
| 6                                                           | -0.383168 | -2.153989 | 0.001897  |
| 6                                                           | 1.754970  | 2.617149  | -0.008512 |

|    |                                                              |           |           |
|----|--------------------------------------------------------------|-----------|-----------|
| 6  | 2.051352                                                     | -2.134708 | 0.007960  |
| 6  | 0.276626                                                     | 2.621473  | -0.001313 |
| 8  | 4.414431                                                     | 0.396026  | -0.011721 |
| 8  | -3.051206                                                    | 1.413962  | 0.004550  |
| 6  | -1.677469                                                    | -2.670781 | -0.002175 |
| 6  | 0.950749                                                     | 1.431055  | 0.004287  |
| 6  | 3.365420                                                     | -0.090350 | -0.000795 |
| 12 | -2.606156                                                    | -0.362506 | 0.004392  |
| 6  | 2.162137                                                     | -0.736468 | 0.006407  |
| 6  | 0.870324                                                     | -0.004928 | 0.008788  |
| 6  | -0.336459                                                    | -0.678233 | 0.008503  |
| 6  | -2.941453                                                    | -2.642188 | -0.025816 |
| 16 | 60.291810 Kcal/mol 2.614504 eV -101.287599 H MutD_5_70.log   |           |           |
| 6  | -0.184800                                                    | -1.562197 | -0.141318 |
| 6  | 4.515354                                                     | -0.946441 | -0.038030 |
| 6  | -3.258446                                                    | 0.679370  | 0.396247  |
| 6  | 0.827213                                                     | -2.226559 | 0.117754  |
| 12 | 0.118591                                                     | 2.445199  | -0.228369 |
| 8  | -0.569481                                                    | 0.663420  | -0.563561 |
| 6  | 3.112661                                                     | 1.280553  | -0.029730 |
| 6  | -3.186971                                                    | -1.654797 | -0.064207 |
| 6  | -1.903925                                                    | 2.937348  | 0.469367  |
| 6  | 3.939271                                                     | 0.182653  | -0.002311 |
| 12 | 2.845430                                                     | -1.950699 | 0.342771  |
| 6  | 2.158040                                                     | 2.076416  | -0.068376 |
| 6  | -2.517730                                                    | -0.474547 | -0.049736 |
| 6  | -1.083051                                                    | -0.467835 | -0.343676 |
| 6  | -2.594707                                                    | 1.863327  | 0.427605  |
| 8  | -3.743732                                                    | -2.670638 | -0.113233 |
| 16 | 60.292858 Kcal/mol 2.614549 eV -101.287598 H Child_11_37.log |           |           |
| 6  | -4.500778                                                    | -0.971145 | 0.428904  |
| 8  | 5.850292                                                     | -0.043244 | 0.149682  |
| 6  | -4.068122                                                    | 0.069906  | 1.006014  |
| 6  | 4.700489                                                     | 0.217075  | 0.103409  |
| 12 | -2.606347                                                    | -1.070743 | -0.758532 |
| 6  | 3.376720                                                     | 0.262557  | 0.148654  |
| 6  | -3.191566                                                    | 1.097877  | 1.129524  |
| 6  | 2.406243                                                     | 1.172320  | -0.107403 |
| 8  | -1.858681                                                    | 0.715265  | -1.305330 |
| 6  | 1.189731                                                     | 1.555892  | -0.234997 |
| 6  | -0.874882                                                    | -2.109958 | -0.295780 |
| 6  | -0.035230                                                    | 1.879995  | -0.430495 |
| 6  | -2.189876                                                    | 1.736213  | 0.760834  |
| 12 | 2.064737                                                     | -1.437354 | 0.406653  |
| 6  | 0.295648                                                     | -2.276569 | 0.108714  |
| 6  | -1.347303                                                    | 1.486004  | -0.372755 |
| 16 | 60.506888 Kcal/mol 2.623830 eV -101.287257 H MutD_13_52.log  |           |           |
| 6  | -3.003439                                                    | 0.103227  | -0.209072 |
| 8  | 2.846290                                                     | 3.226807  | 0.054049  |
| 6  | -0.430623                                                    | -0.000394 | -0.155870 |
| 6  | -5.562905                                                    | -0.096414 | -0.018484 |
| 6  | -1.713411                                                    | 0.127011  | -0.187624 |

|                                                              |           |           |           |
|--------------------------------------------------------------|-----------|-----------|-----------|
| 8                                                            | -8.025179 | 0.084613  | 0.238231  |
| 6                                                            | 4.002848  | -2.305793 | 0.098284  |
| 6                                                            | 3.293743  | -3.348875 | 0.093452  |
| 6                                                            | 3.382931  | 4.255922  | 0.095141  |
| 6                                                            | 0.864072  | -0.192514 | -0.107402 |
| 6                                                            | -4.282538 | 0.049501  | -0.137903 |
| 6                                                            | 4.444507  | -1.002072 | 0.095352  |
| 6                                                            | -6.833234 | 0.048865  | 0.106294  |
| 6                                                            | 4.474784  | 0.249708  | 0.068345  |
| 12                                                           | 1.556863  | -2.204053 | -0.017703 |
| 12                                                           | 2.577363  | 1.052354  | -0.047407 |
| 16                                                           |           |           |           |
| 60.527789 Kcal/mol 2.624737 eV -101.287223 H Child_8_54.log  |           |           |           |
| 8                                                            | -6.080656 | -1.018550 | -0.374076 |
| 6                                                            | 4.053385  | -1.318015 | 0.801988  |
| 6                                                            | -2.447417 | -1.026871 | 0.012331  |
| 6                                                            | 4.576686  | -0.251061 | -0.211403 |
| 6                                                            | -4.925552 | -0.780935 | -0.223060 |
| 8                                                            | 5.614686  | 0.035174  | -0.770266 |
| 6                                                            | -1.258771 | -1.388762 | 0.092196  |
| 6                                                            | 2.343462  | 1.208440  | 0.004482  |
| 12                                                           | 0.725599  | -1.741830 | 0.184290  |
| 6                                                            | 1.337379  | 1.917120  | 0.071239  |
| 6                                                            | -3.697524 | -0.391020 | -0.054338 |
| 6                                                            | 3.144722  | 0.086729  | -0.198856 |
| 6                                                            | 0.079107  | 2.420112  | 0.136352  |
| 12                                                           | -2.826605 | 1.486995  | 0.154844  |
| 6                                                            | -1.147578 | 2.614174  | 0.188702  |
| 6                                                            | 2.765407  | -1.269073 | 0.227889  |
| 16                                                           |           |           |           |
| 60.935535 Kcal/mol 2.642418 eV -101.286574 H Child_8_27.log  |           |           |           |
| 8                                                            | 2.141775  | 3.002049  | 0.107528  |
| 12                                                           | 2.562186  | -2.921388 | 0.006943  |
| 6                                                            | 2.917870  | 1.969444  | 0.035212  |
| 6                                                            | 4.074666  | -1.623605 | -0.077910 |
| 12                                                           | 0.327266  | 3.249395  | 0.062181  |
| 6                                                            | 0.520692  | -3.088709 | 0.055769  |
| 6                                                            | -1.551191 | 2.527998  | 0.069779  |
| 8                                                            | -5.157216 | -0.565548 | 0.272052  |
| 6                                                            | 3.555890  | 0.926861  | -0.026801 |
| 6                                                            | -3.946756 | -0.445631 | -0.039780 |
| 6                                                            | -2.496014 | 1.719800  | -0.189465 |
| 6                                                            | -0.651351 | -2.681257 | 0.047068  |
| 6                                                            | 3.924086  | -0.385779 | -0.063398 |
| 6                                                            | -2.928321 | -1.463669 | -0.014517 |
| 6                                                            | -3.306436 | 0.728745  | -0.459639 |
| 6                                                            | -1.871451 | -2.088880 | 0.019327  |
| 16                                                           |           |           |           |
| 61.290532 Kcal/mol 2.657812 eV -101.286008 H Child_10_18.log |           |           |           |
| 6                                                            | 0.507343  | -0.122136 | 0.516050  |
| 6                                                            | -3.951591 | 1.999546  | -0.556169 |
| 6                                                            | 0.221469  | -1.388937 | 0.175655  |
| 6                                                            | -4.004610 | 0.769056  | -0.751456 |
| 6                                                            | 0.430794  | 1.083656  | 0.849964  |
| 12                                                           | -2.676404 | 3.292208  | 0.326087  |

|           |           |           |                                  |
|-----------|-----------|-----------|----------------------------------|
| 6         | 0.635458  | -2.686165 | 0.244280                         |
| 6         | -3.779632 | -0.570137 | -0.943233                        |
| 8         | 7.514291  | 1.780690  | -0.447368                        |
| 6         | -3.330132 | -1.728516 | -1.001129                        |
| 6         | 7.913797  | 2.410636  | -1.329621                        |
| 6         | -0.768008 | 3.371840  | 1.091062                         |
| 6         | -0.116006 | 2.310474  | 1.000407                         |
| 12        | -1.498764 | -2.434923 | -0.494469                        |
| 6         | 1.575703  | -3.542990 | 0.575253                         |
| 8         | 2.247524  | -4.496363 | 0.796644                         |
| 16        |           |           |                                  |
| 61.761266 | Kcal/mol  | 2.678225  | eV -101.285258 H MutD_18_64.log  |
| 12        | 2.823968  | -0.005715 | -1.169352                        |
| 8         | -5.239101 | -1.765389 | -0.874597                        |
| 6         | 2.121667  | 1.907353  | -1.047594                        |
| 8         | 4.758970  | -0.646499 | 1.857979                         |
| 6         | -1.352058 | 2.659889  | 0.092290                         |
| 6         | -0.670605 | -1.333335 | 0.475748                         |
| 6         | -3.403698 | 1.325553  | 0.954581                         |
| 6         | -4.357761 | -1.564908 | -0.193563                        |
| 6         | 1.075417  | 2.474788  | -0.692721                        |
| 6         | 0.491244  | -1.642625 | 0.115044                         |
| 6         | 1.662460  | -1.967226 | -0.515775                        |
| 6         | -0.177746 | 2.767481  | -0.271617                        |
| 6         | 2.818522  | -2.090191 | -1.008539                        |
| 6         | 4.302263  | -0.340524 | 0.871742                         |
| 6         | -2.506654 | 2.087213  | 0.521758                         |
| 12        | -2.505405 | -0.528094 | 0.863087                         |
| 16        |           |           |                                  |
| 61.902559 | Kcal/mol  | 2.684352  | eV -101.285033 H MutD_9_76.log   |
| 6         | -1.247969 | -2.540262 | -1.022737                        |
| 6         | 4.031379  | 0.648725  | -0.612505                        |
| 6         | 0.929569  | 0.999120  | 0.731235                         |
| 8         | 5.053263  | 1.030546  | -1.138497                        |
| 6         | -0.297608 | -3.276971 | -0.650553                        |
| 12        | -1.567199 | 2.887516  | 0.244927                         |
| 12        | 0.730677  | -1.964767 | 0.599354                         |
| 6         | -1.437297 | -0.313900 | 2.251534                         |
| 6         | 3.004570  | 0.116026  | -0.073687                        |
| 8         | -0.790270 | -1.221549 | 1.912368                         |
| 6         | -2.967786 | 0.894130  | -1.205489                        |
| 6         | -3.045011 | 2.096682  | -0.872769                        |
| 6         | -2.668936 | -0.426782 | -1.341603                        |
| 6         | 1.787131  | -0.090649 | 0.446647                         |
| 6         | -2.115771 | -1.527689 | -1.288085                        |
| 6         | 0.016782  | 1.830740  | 0.917621                         |
| 16        |           |           |                                  |
| 62.324255 | Kcal/mol  | 2.702639  | eV -101.284360 H Child_10_30.log |
| 6         | 3.934395  | 0.025907  | 0.403647                         |
| 12        | -4.095017 | 0.146715  | 0.556323                         |
| 6         | 3.247545  | 1.039038  | 0.553117                         |
| 6         | -2.905838 | -1.606552 | 0.201339                         |
| 8         | 4.375977  | -1.175145 | 0.153024                         |
| 8         | -2.808723 | -2.820064 | 0.152363                         |
| 6         | -2.154001 | 0.717444  | -0.085562                        |

|                                                             |           |           |           |
|-------------------------------------------------------------|-----------|-----------|-----------|
| 6                                                           | 2.203696  | 1.893598  | 0.480226  |
| 6                                                           | -1.792800 | -0.604569 | -0.169527 |
| 6                                                           | 1.080265  | 2.360956  | 0.283449  |
| 6                                                           | -0.507118 | -1.132860 | -0.439419 |
| 6                                                           | -0.200592 | 2.532340  | -0.170674 |
| 6                                                           | -1.390657 | 1.860132  | -0.336187 |
| 12                                                          | 2.605266  | -1.805727 | -0.372792 |
| 6                                                           | -1.248643 | 3.179539  | -0.925060 |
| 6                                                           | 0.623580  | -1.620002 | -0.569595 |
| 16                                                          |           |           |           |
| 62.444505 Kcal/mol 2.707853 eV -101.284169 H Child_4_22.log |           |           |           |
| 6                                                           | 3.383698  | -1.680911 | 0.092085  |
| 8                                                           | -3.610066 | -2.223322 | -0.471940 |
| 12                                                          | 0.400424  | 3.335672  | -0.023339 |
| 6                                                           | -2.590324 | -1.660502 | -0.203004 |
| 6                                                           | 3.870718  | -0.442232 | -0.167912 |
| 8                                                           | -2.617375 | 0.231894  | 0.087028  |
| 6                                                           | 3.477535  | 0.728257  | -0.272746 |
| 12                                                          | -2.236434 | 2.202435  | 0.283275  |
| 6                                                           | 1.058143  | 1.023713  | -0.120665 |
| 6                                                           | 2.357249  | -2.383380 | 0.274070  |
| 6                                                           | 2.266893  | 1.391078  | -0.295974 |
| 6                                                           | 1.029792  | -2.605079 | 0.356951  |
| 6                                                           | -0.167833 | -2.338690 | 0.208107  |
| 6                                                           | -0.287321 | 1.010716  | 0.049531  |
| 6                                                           | -1.240126 | -1.457739 | 0.014136  |
| 6                                                           | -1.183150 | -0.006209 | 0.058763  |
| 16                                                          |           |           |           |
| 62.474133 Kcal/mol 2.709138 eV -101.284122 H Child_1_55.log |           |           |           |
| 12                                                          | -1.419329 | 2.753918  | 0.000000  |
| 8                                                           | 4.763666  | -1.504795 | -0.000000 |
| 8                                                           | -2.889384 | 1.610205  | 0.000000  |
| 6                                                           | -2.640054 | 0.318494  | 0.000000  |
| 6                                                           | 3.682060  | -0.996397 | -0.000000 |
| 6                                                           | 0.287631  | 1.663216  | 0.000000  |
| 6                                                           | 0.692765  | -1.999613 | -0.000000 |
| 6                                                           | -3.609442 | -0.777603 | -0.000000 |
| 6                                                           | -0.470441 | -2.513258 | -0.000000 |
| 6                                                           | -0.000000 | 0.286003  | 0.000000  |
| 6                                                           | 2.571610  | -0.325096 | -0.000000 |
| 6                                                           | -1.343113 | -0.315125 | -0.000000 |
| 6                                                           | 1.193577  | -0.745511 | -0.000000 |
| 6                                                           | -3.056288 | -1.899781 | -0.000000 |
| 6                                                           | -1.613016 | -1.795138 | -0.000000 |
| 12                                                          | 2.322164  | 1.725713  | 0.000000  |
| 16                                                          |           |           |           |
| 62.479123 Kcal/mol 2.709355 eV -101.284114 H MutD_17_36.log |           |           |           |
| 12                                                          | 2.795394  | 1.559666  | -0.735425 |
| 6                                                           | -1.736094 | 2.416836  | 0.366547  |
| 6                                                           | -2.903754 | 2.003078  | 0.391361  |
| 6                                                           | -3.830832 | -1.394547 | 0.015991  |
| 6                                                           | -0.412420 | 2.091853  | 0.155005  |
| 6                                                           | -1.601329 | -2.595022 | -0.354787 |
| 6                                                           | -3.903103 | 1.098643  | 0.352438  |
| 12                                                          | 1.248084  | -1.132511 | -0.375282 |

|                                                              |           |           |           |
|--------------------------------------------------------------|-----------|-----------|-----------|
| 6                                                            | -0.355783 | -2.511064 | -0.455885 |
| 8                                                            | 4.096071  | -1.024759 | 1.507104  |
| 6                                                            | 3.044452  | -1.177049 | 1.022835  |
| 6                                                            | -2.869620 | -2.160890 | -0.190788 |
| 6                                                            | -4.169509 | -0.104115 | 0.207205  |
| 6                                                            | 0.353774  | 0.917486  | -0.012257 |
| 8                                                            | 2.932770  | -0.255410 | -0.837921 |
| 6                                                            | 0.925475  | 2.267371  | -0.168495 |
| 16                                                           |           |           |           |
| 62.514807 Kcal/mol 2.710902 eV -101.284057 H MutD_7_76.log   |           |           |           |
| 6                                                            | -2.806119 | -2.907583 | 0.166148  |
| 6                                                            | -0.566567 | -1.581474 | 0.220984  |
| 6                                                            | 4.386589  | 0.112729  | -0.390602 |
| 6                                                            | 0.040991  | 0.986099  | 0.439860  |
| 8                                                            | -3.820573 | -3.559776 | 0.118189  |
| 6                                                            | 3.987063  | -1.185978 | -0.416828 |
| 6                                                            | -1.751385 | -2.197807 | 0.217279  |
| 6                                                            | 2.970910  | 3.505895  | 0.147505  |
| 6                                                            | -0.345328 | -0.196186 | 0.362011  |
| 12                                                           | 1.110271  | 2.721818  | 0.417708  |
| 6                                                            | 3.336745  | -2.248408 | -0.378218 |
| 8                                                            | -6.938038 | 2.869215  | -0.299729 |
| 6                                                            | 3.759444  | 2.559819  | -0.082517 |
| 6                                                            | 4.324114  | 1.338491  | -0.283575 |
| 12                                                           | 1.346928  | -2.493892 | -0.053551 |
| 6                                                            | -7.906041 | 2.279300  | -0.488308 |
| 16                                                           |           |           |           |
| 62.850449 Kcal/mol 2.725457 eV -101.283522 H MutD_6_64.log   |           |           |           |
| 6                                                            | -3.977104 | 1.835178  | -0.538596 |
| 6                                                            | -0.046027 | -0.354051 | 0.353709  |
| 6                                                            | -4.932642 | -0.529223 | -0.368755 |
| 12                                                           | -1.125794 | 2.320115  | -0.128493 |
| 6                                                            | 1.758245  | 1.327098  | 0.414429  |
| 6                                                            | 9.919119  | -0.885071 | -0.480529 |
| 8                                                            | 4.168243  | 1.712345  | 0.776631  |
| 6                                                            | 0.481044  | 0.958244  | 0.271195  |
| 6                                                            | -4.681136 | 0.677089  | -0.481545 |
| 6                                                            | -0.679216 | -1.425190 | 0.403740  |
| 8                                                            | 9.172947  | -1.719951 | -0.747607 |
| 6                                                            | -4.702521 | -1.861432 | -0.169863 |
| 12                                                           | -2.200095 | -2.773492 | 0.340907  |
| 6                                                            | -3.079593 | 2.694706  | -0.534884 |
| 6                                                            | 3.007721  | 1.462868  | 0.607524  |
| 6                                                            | -4.204366 | -2.983324 | 0.060048  |
| 16                                                           |           |           |           |
| 63.114749 Kcal/mol 2.736918 eV -101.283101 H Child_16_28.log |           |           |           |
| 8                                                            | 2.138991  | 3.702367  | -0.372267 |
| 12                                                           | -0.267197 | -3.623954 | -0.535263 |
| 6                                                            | 1.881276  | 2.564198  | -0.146179 |
| 6                                                            | 2.802222  | -2.035077 | 0.049369  |
| 6                                                            | 1.727982  | 1.278398  | 0.083624  |
| 6                                                            | -0.808602 | -1.668522 | 0.221011  |
| 6                                                            | -1.963933 | 1.475827  | -0.129816 |
| 6                                                            | -2.047829 | -1.121802 | 0.343561  |
| 6                                                            | -0.755689 | 1.254131  | -0.119886 |



|                                                              |           |           |           |
|--------------------------------------------------------------|-----------|-----------|-----------|
| 6                                                            | 1.621382  | -1.575062 | 0.066057  |
| 6                                                            | -3.317187 | 0.942399  | 0.039507  |
| 12                                                           | 3.326604  | -0.041650 | 0.349317  |
| 8                                                            | -4.390035 | 1.528864  | -0.094502 |
| 6                                                            | 0.371134  | -0.877169 | 0.076508  |
| 6                                                            | 0.465610  | 0.554358  | 0.000621  |
| 6                                                            | -3.093787 | -0.435448 | 0.509872  |
| 16                                                           |           |           |           |
| 63.245954 Kcal/mol 2.742608 eV -101.282892 H Child_12_63.log |           |           |           |
| 6                                                            | 6.114370  | -1.052798 | -1.171731 |
| 6                                                            | -0.065732 | 2.819159  | -0.020932 |
| 6                                                            | 2.726309  | -1.678807 | 0.562326  |
| 6                                                            | 1.225964  | 2.851542  | 0.120312  |
| 8                                                            | 6.695146  | -0.629162 | -0.275264 |
| 6                                                            | -1.324921 | 2.620139  | -0.075937 |
| 12                                                           | 0.708442  | -2.149077 | 0.353085  |
| 6                                                            | 2.165219  | 1.932386  | 0.233811  |
| 6                                                            | 2.900818  | -0.428673 | 0.487007  |
| 6                                                            | -2.344868 | 1.784214  | -0.116357 |
| 6                                                            | -3.923465 | -0.274361 | -0.103187 |
| 6                                                            | 2.893276  | 0.915803  | 0.394010  |
| 6                                                            | -5.136359 | -0.748074 | -0.188627 |
| 6                                                            | -3.260779 | 0.920809  | -0.115614 |
| 8                                                            | -6.169171 | -1.321045 | -0.282297 |
| 12                                                           | -2.044008 | -1.381454 | 0.016081  |
| 16                                                           |           |           |           |
| 63.311591 Kcal/mol 2.745454 eV -101.282787 H MutI_4_73.log   |           |           |           |
| 12                                                           | -1.312970 | 0.736309  | 0.247066  |
| 6                                                            | -2.224969 | -1.163332 | 0.422404  |
| 8                                                            | -3.045856 | 1.538256  | -0.845219 |
| 8                                                            | -4.675205 | -1.517208 | 0.558821  |
| 6                                                            | -4.053670 | 1.956390  | -1.225283 |
| 6                                                            | 3.360223  | 1.710906  | 0.212428  |
| 6                                                            | 0.175086  | -2.045730 | -0.186352 |
| 6                                                            | -0.187208 | 2.462475  | 0.415375  |
| 6                                                            | 4.120445  | -1.799191 | -0.329255 |
| 6                                                            | -0.999270 | -1.760697 | 0.129730  |
| 12                                                           | 2.128755  | -2.401871 | -0.360553 |
| 6                                                            | 2.416026  | 2.568345  | 0.393841  |
| 6                                                            | 4.227902  | -0.544249 | -0.175264 |
| 6                                                            | 4.240306  | 0.785422  | 0.031518  |
| 6                                                            | 1.072768  | 2.573411  | 0.428125  |
| 6                                                            | -3.484460 | -1.440688 | 0.491571  |
| 16                                                           |           |           |           |
| 63.342148 Kcal/mol 2.746779 eV -101.282738 H Child_12_57.log |           |           |           |
| 12                                                           | 1.612047  | 2.112767  | -0.206798 |
| 8                                                            | -7.718129 | 0.249310  | 0.848658  |
| 6                                                            | 2.985929  | -4.286169 | 0.637943  |
| 6                                                            | -6.603727 | 0.106080  | 0.420664  |
| 6                                                            | 3.852491  | 2.420245  | 0.523713  |
| 6                                                            | -5.411903 | -0.013245 | -0.008902 |
| 8                                                            | 2.692920  | -3.232745 | 0.242553  |
| 6                                                            | -4.170908 | -0.150175 | -0.367868 |
| 12                                                           | 2.580415  | -1.125079 | -0.246055 |
| 6                                                            | -2.936757 | -0.279873 | -0.664393 |

|           |           |           |                                 |
|-----------|-----------|-----------|---------------------------------|
| 6         | 4.303193  | 1.123597  | 0.427774                        |
| 6         | 4.289692  | -0.095984 | 0.171501                        |
| 6         | -1.652954 | -0.268781 | -0.815201                       |
| 6         | 3.129167  | 3.453381  | 0.448756                        |
| 6         | -0.366680 | -0.122118 | -0.775577                       |
| 6         | 0.897813  | 0.115579  | -0.547652                       |
| 16        |           |           |                                 |
| 63.513783 | Kcal/mol  | 2.754222  | eV -101.282465 H Child_3_41.log |
| 6         | 4.550424  | -1.415155 | -0.040446                       |
| 12        | -2.971705 | 2.084893  | 0.054780                        |
| 6         | 4.392551  | -0.167650 | -0.015604                       |
| 6         | 0.378417  | 2.122961  | 0.066980                        |
| 12        | 2.608050  | -2.106565 | -0.038975                       |
| 6         | -0.930503 | 1.712376  | 0.057728                        |
| 6         | 0.687403  | -1.454576 | -0.005569                       |
| 6         | 1.609433  | 2.259338  | 0.064259                        |
| 6         | -2.708660 | 0.029325  | 0.091773                        |
| 6         | 3.855738  | 1.079673  | 0.013837                        |
| 6         | 2.890064  | 1.852637  | 0.040206                        |
| 6         | -3.267685 | -1.297464 | 0.122935                        |
| 6         | -1.264586 | 0.342224  | 0.052959                        |
| 8         | -3.621282 | -2.222359 | 0.830720                        |
| 8         | -3.276933 | -1.042610 | -1.207235                       |
| 6         | -0.267665 | -0.667052 | 0.021349                        |
| 16        |           |           |                                 |
| 63.526329 | Kcal/mol  | 2.754766  | eV -101.282445 H MutD_13_32.log |
| 8         | 5.534907  | 0.565365  | 1.148608                        |
| 6         | -0.663887 | -2.832158 | -0.105591                       |
| 6         | -4.671166 | 0.194392  | 0.298390                        |
| 6         | 0.731510  | 2.537413  | -0.420933                       |
| 6         | 5.251167  | -0.438513 | 1.628759                        |
| 6         | -3.388632 | -0.014632 | 0.388848                        |
| 6         | 0.556614  | -2.665954 | -0.332000                       |
| 6         | 1.803705  | -2.254577 | -0.637434                       |
| 6         | 1.984599  | 2.137551  | -0.720207                       |
| 6         | 3.192527  | -0.115856 | -1.026517                       |
| 6         | -0.480832 | 2.690294  | -0.131135                       |
| 12        | -2.386023 | -1.791733 | 0.271868                        |
| 6         | 2.674206  | 1.089291  | -0.884598                       |
| 8         | -5.852670 | 0.371876  | 0.153901                        |
| 6         | 2.558137  | -1.261138 | -0.839362                       |
| 12        | -2.176109 | 1.633847  | 0.250683                        |
| 16        |           |           |                                 |
| 63.629546 | Kcal/mol  | 2.759242  | eV -101.282280 H Child_5_15.log |
| 8         | 5.501189  | 0.029801  | -1.040235                       |
| 6         | -4.669378 | 1.380722  | -0.511438                       |
| 6         | 4.436036  | -0.091268 | -0.536862                       |
| 6         | -3.783868 | 0.245063  | -0.333016                       |
| 6         | 3.265436  | 0.067338  | 0.035804                        |
| 6         | -3.236222 | 1.495394  | -0.256696                       |
| 6         | 2.095425  | -0.487650 | 0.494709                        |
| 6         | -3.438281 | -1.092029 | -0.257880                       |
| 6         | 1.545634  | -1.750440 | 0.478581                        |
| 6         | -2.043218 | 2.147261  | -0.060682                       |
| 12        | 1.743067  | 1.553228  | 0.594884                        |

|                                                              |           |           |           |
|--------------------------------------------------------------|-----------|-----------|-----------|
| 6                                                            | -2.971805 | -2.239951 | -0.174964 |
| 6                                                            | 0.784384  | -2.740399 | 0.408050  |
| 6                                                            | -0.880886 | 2.465866  | 0.169258  |
| 8                                                            | 0.351475  | 2.783092  | 0.364444  |
| 12                                                           | -1.196471 | -3.128444 | 0.128212  |
| 16                                                           |           |           |           |
| 63.747860 Kcal/mol 2.764372 eV -101.282092 H Child_10_57.log |           |           |           |
| 6                                                            | 3.497109  | -1.373995 | 0.150333  |
| 6                                                            | -0.744517 | 2.678978  | -0.245821 |
| 6                                                            | 2.582005  | -2.196957 | 0.082252  |
| 6                                                            | -1.799441 | 2.029683  | -0.332985 |
| 8                                                            | 4.326372  | -0.403867 | 0.207584  |
| 6                                                            | -3.173123 | 0.181797  | -1.499663 |
| 6                                                            | 1.336887  | -2.688907 | -0.019988 |
| 6                                                            | -2.809038 | 1.068529  | -0.389357 |
| 6                                                            | 0.115737  | -2.866174 | -0.131550 |
| 12                                                           | 1.287614  | 2.793808  | -0.105918 |
| 6                                                            | -1.175087 | -2.524564 | -0.244944 |
| 6                                                            | -3.049090 | -0.803632 | -0.400345 |
| 12                                                           | 3.788999  | 1.432816  | 0.119898  |
| 6                                                            | -3.332080 | 0.186234  | 0.685920  |
| 6                                                            | -2.257900 | -1.932692 | -0.354083 |
| 8                                                            | -3.834887 | 0.245206  | 1.796618  |
| 16                                                           |           |           |           |
| 63.978715 Kcal/mol 2.774383 eV -101.281724 H Child_13_19.log |           |           |           |
| 6                                                            | -2.858555 | -2.036006 | -0.128299 |
| 8                                                            | 5.311451  | -0.429318 | -0.819145 |
| 6                                                            | -3.350111 | -0.803815 | -0.373971 |
| 6                                                            | 4.160764  | -0.389122 | -0.445458 |
| 8                                                            | -1.113249 | -3.741161 | 0.497423  |
| 12                                                           | 1.155502  | 2.453939  | 0.682516  |
| 6                                                            | -2.121065 | -2.972631 | 0.199814  |
| 6                                                            | 2.962424  | -0.328765 | -0.011635 |
| 12                                                           | 0.232463  | -2.362791 | 0.104900  |
| 6                                                            | -1.330592 | 3.481071  | -0.047606 |
| 6                                                            | -3.448989 | 0.417094  | -0.537748 |
| 6                                                            | 1.563529  | -0.826285 | 0.253327  |
| 6                                                            | 1.788871  | 0.471399  | 0.500638  |
| 6                                                            | -0.212189 | 3.911645  | 0.317055  |
| 6                                                            | -3.107447 | 1.720377  | -0.513278 |
| 6                                                            | -2.420170 | 2.733381  | -0.358710 |
| 16                                                           |           |           |           |
| 64.126143 Kcal/mol 2.780776 eV -101.281489 H MutD_15_76.log  |           |           |           |
| 6                                                            | -1.734719 | 1.475345  | 0.031170  |
| 6                                                            | 2.542129  | -0.499763 | -0.021049 |
| 6                                                            | 3.487162  | -1.586629 | 0.072902  |
| 6                                                            | -2.977325 | 0.864726  | 0.024407  |
| 12                                                           | 1.501700  | 1.335687  | -0.007953 |
| 8                                                            | -5.564264 | 0.999844  | 0.098251  |
| 6                                                            | -4.408026 | 0.607971  | 0.046710  |
| 6                                                            | -0.522008 | 1.740805  | 0.027090  |
| 6                                                            | -1.692549 | -2.299344 | -0.090679 |
| 6                                                            | 2.076376  | -1.824464 | -0.045150 |
| 6                                                            | 0.841003  | -2.435990 | -0.092288 |
| 6                                                            | -3.424872 | -0.444757 | -0.013705 |

|                                                              |           |           |           |
|--------------------------------------------------------------|-----------|-----------|-----------|
| 6                                                            | -2.737250 | -1.647455 | -0.063300 |
| 8                                                            | 4.632767  | -2.015604 | 0.189786  |
| 12                                                           | 3.583179  | 3.671219  | -0.071702 |
| 6                                                            | -0.377685 | -2.609912 | -0.100848 |
| 16                                                           |           |           |           |
| 64.376700 Kcal/mol 2.791641 eV -101.281090 H MutD_13_34.log  |           |           |           |
| 12                                                           | -2.780745 | 0.801810  | 0.768922  |
| 6                                                            | 0.082750  | -1.901484 | 0.380700  |
| 6                                                            | 2.513446  | -1.133516 | 0.094368  |
| 8                                                            | 5.866712  | 0.242404  | -0.446437 |
| 6                                                            | -3.994737 | 0.072630  | -1.242106 |
| 6                                                            | 0.126212  | 2.072858  | 0.147841  |
| 6                                                            | 3.439353  | -0.170083 | -0.115713 |
| 6                                                            | -3.035336 | -0.897165 | -1.175957 |
| 6                                                            | -2.058872 | -1.550806 | -0.776390 |
| 6                                                            | -1.230455 | -1.484846 | 0.388820  |
| 6                                                            | 4.750616  | -0.072325 | -0.249711 |
| 12                                                           | 1.974837  | 1.418107  | -0.110196 |
| 8                                                            | -1.767811 | -0.862368 | 1.413008  |
| 6                                                            | 1.289879  | -1.515168 | 0.230802  |
| 6                                                            | -4.649621 | 1.030665  | -0.720817 |
| 6                                                            | -1.086620 | 1.936026  | 0.431951  |
| 16                                                           |           |           |           |
| 64.382135 Kcal/mol 2.791877 eV -101.281081 H Child_1_61.log  |           |           |           |
| 8                                                            | -4.708913 | -1.911915 | 0.157031  |
| 6                                                            | 3.666534  | -1.822940 | 0.388151  |
| 6                                                            | -3.677069 | -1.309388 | 0.057934  |
| 6                                                            | 1.570575  | 2.169714  | -0.056058 |
| 6                                                            | -2.658771 | -0.541712 | -0.020128 |
| 12                                                           | 2.997736  | 0.146694  | -0.126976 |
| 8                                                            | -1.547128 | 2.309538  | 0.099725  |
| 6                                                            | 2.676402  | -2.599420 | 0.332943  |
| 6                                                            | -1.372630 | -0.183999 | -0.154744 |
| 6                                                            | 0.580187  | 1.233918  | -0.291243 |
| 6                                                            | -0.896228 | 1.239446  | -0.122799 |
| 12                                                           | 0.044856  | 3.638103  | 0.292943  |
| 6                                                            | 0.226102  | -2.336459 | -0.094786 |
| 6                                                            | 0.950644  | -0.144058 | -0.521962 |
| 6                                                            | 1.345102  | -2.832669 | 0.129664  |
| 6                                                            | -0.154644 | -0.972191 | -0.321246 |
| 16                                                           |           |           |           |
| 64.772693 Kcal/mol 2.808813 eV -101.280459 H Child_10_61.log |           |           |           |
| 6                                                            | 3.150625  | -0.559857 | 1.417098  |
| 8                                                            | -5.447141 | -0.766110 | 0.694616  |
| 6                                                            | 2.932012  | -1.816579 | 1.369997  |
| 6                                                            | -4.321745 | -0.667026 | 0.316884  |
| 6                                                            | 3.268962  | 0.783190  | 1.423397  |
| 6                                                            | -3.119483 | -0.428165 | -0.117439 |
| 6                                                            | 2.486406  | 1.701003  | 0.917840  |
| 6                                                            | -1.912202 | -1.146479 | -0.141733 |
| 6                                                            | 1.634511  | 2.537658  | 0.480258  |
| 6                                                            | -0.764984 | -1.629578 | -0.159742 |
| 8                                                            | 3.011938  | -0.654469 | -2.543995 |
| 12                                                           | -2.235727 | 1.384450  | -0.623235 |
| 6                                                            | 0.422488  | 2.740161  | -0.057962 |

|                                                              |           |           |           |
|--------------------------------------------------------------|-----------|-----------|-----------|
| 12                                                           | 1.173740  | -2.043538 | 0.235014  |
| 6                                                            | 2.349530  | -1.071953 | -1.710498 |
| 6                                                            | -0.755208 | 2.769909  | -0.495821 |
| 16                                                           |           |           |           |
| 65.834701 Kcal/mol 2.854866 eV -101.278766 H Child_10_40.log |           |           |           |
| 6                                                            | -3.750666 | 1.124126  | -0.506349 |
| 8                                                            | 1.673370  | 0.082308  | 1.405586  |
| 6                                                            | -3.808804 | -0.131373 | -0.614805 |
| 6                                                            | 0.604451  | -0.539613 | 1.156891  |
| 6                                                            | -3.190639 | -1.320925 | -0.464894 |
| 12                                                           | 2.632492  | 1.138929  | -0.001223 |
| 12                                                           | -1.733161 | 1.669137  | 0.218810  |
| 6                                                            | 0.442858  | -1.756131 | 0.310658  |
| 6                                                            | -2.202973 | -1.996223 | -0.105994 |
| 6                                                            | 1.435344  | -2.144721 | -0.557474 |
| 6                                                            | 0.037752  | 2.550089  | -0.365681 |
| 8                                                            | 3.346805  | -0.596501 | -1.000213 |
| 6                                                            | 2.474812  | -1.447611 | -0.783695 |
| 6                                                            | -0.823602 | -0.243962 | 1.035234  |
| 6                                                            | 1.287366  | 2.543335  | -0.514389 |
| 6                                                            | -0.998129 | -1.567533 | 0.434827  |
| 16                                                           |           |           |           |
| 66.071076 Kcal/mol 2.865117 eV -101.278390 H Child_18_15.log |           |           |           |
| 6                                                            | 4.536354  | -1.189027 | -0.549943 |
| 6                                                            | -5.346933 | -0.479164 | -1.127909 |
| 6                                                            | 4.429009  | 0.063264  | -0.447283 |
| 8                                                            | -5.749389 | 0.595442  | -1.111043 |
| 12                                                           | 2.913124  | -2.382009 | -0.198347 |
| 6                                                            | -1.495959 | 1.753810  | 0.479970  |
| 6                                                            | 4.149906  | 1.376382  | -0.328213 |
| 6                                                            | -2.452623 | 0.968836  | 0.581781  |
| 6                                                            | 3.185389  | 2.173937  | -0.100873 |
| 6                                                            | -0.399003 | 2.497893  | 0.364071  |
| 6                                                            | 0.935830  | -2.707002 | 0.206490  |
| 12                                                           | -2.089229 | -1.710938 | 0.591355  |
| 6                                                            | 2.122432  | 2.912329  | 0.068766  |
| 8                                                            | -3.137309 | -0.125958 | 0.690571  |
| 6                                                            | -0.290790 | -2.570023 | 0.395268  |
| 6                                                            | 0.827529  | 2.758681  | 0.232490  |
| 16                                                           |           |           |           |
| 66.319317 Kcal/mol 2.875881 eV -101.277994 H Child_5_41.log  |           |           |           |
| 6                                                            | 3.728619  | -1.405677 | 0.139551  |
| 6                                                            | -7.416418 | 0.940328  | 0.238794  |
| 6                                                            | 2.887619  | -2.467657 | 0.063546  |
| 8                                                            | -6.510638 | 0.320968  | 0.580724  |
| 6                                                            | 4.172348  | -0.259351 | 0.212722  |
| 6                                                            | -1.670773 | 0.740372  | -0.379639 |
| 6                                                            | 1.928513  | -3.258148 | 0.016322  |
| 6                                                            | -3.065611 | 0.276750  | -0.494194 |
| 6                                                            | 4.252913  | 1.095493  | 0.252672  |
| 6                                                            | -0.712188 | 1.738676  | -0.337270 |
| 6                                                            | 4.027401  | 2.320084  | 0.256727  |
| 6                                                            | 0.228731  | 2.540176  | -0.241269 |
| 12                                                           | -0.053722 | -2.935200 | -0.054114 |
| 12                                                           | 2.159889  | 3.076672  | 0.004321  |

|           |           |           |                                  |
|-----------|-----------|-----------|----------------------------------|
| 6         | -1.945104 | -0.588989 | -0.276235                        |
| 8         | -1.460648 | -1.787219 | -0.094829                        |
| 16        |           |           |                                  |
| 66.330374 | Kcal/mol  | 2.876361  | eV -101.277976 H Child_8_36.log  |
| 8         | -6.958595 | -0.722398 | 0.296391                         |
| 8         | 5.129520  | -2.351446 | 0.263365                         |
| 6         | -5.789903 | -0.462788 | 0.175189                         |
| 6         | 4.263537  | -1.571333 | 0.147155                         |
| 6         | -4.569390 | -0.105096 | 0.076846                         |
| 6         | 0.666888  | -1.046528 | -0.264092                        |
| 6         | -3.265969 | -0.007536 | -0.124270                        |
| 6         | 1.901241  | -1.004883 | -0.137937                        |
| 6         | -2.363716 | 1.068584  | 0.025941                         |
| 6         | 3.279431  | -0.671875 | 0.016263                         |
| 12        | -1.385287 | -1.027560 | -0.393758                        |
| 6         | -1.249011 | 1.645108  | 0.001543                         |
| 6         | 2.855609  | 1.885144  | 0.013878                         |
| 6         | 4.317612  | 1.970711  | 0.105410                         |
| 12        | 0.788713  | 1.863155  | -0.022289                        |
| 6         | 3.585586  | 0.727762  | 0.049828                         |
| 16        |           |           |                                  |
| 67.713168 | Kcal/mol  | 2.936325  | eV -101.275773 H Child_3_50.log  |
| 8         | -6.131482 | 1.149208  | 0.688034                         |
| 8         | 5.478498  | 0.972820  | 0.693944                         |
| 6         | -5.079884 | 0.646011  | 0.414471                         |
| 6         | 4.533300  | 0.403566  | 0.354747                         |
| 6         | -3.974550 | 0.045884  | 0.185270                         |
| 6         | 1.681512  | -2.099238 | 0.516336                         |
| 6         | 0.486481  | 0.628474  | -1.993641                        |
| 6         | 0.450605  | -2.202954 | 0.712052                         |
| 6         | -2.735468 | -0.344782 | -0.149600                        |
| 12        | 2.758650  | -0.705958 | -0.561298                        |
| 6         | -0.842331 | 0.530044  | -1.718245                        |
| 6         | -0.883788 | -1.931469 | 0.708262                         |
| 6         | 1.731025  | 0.535906  | -1.869457                        |
| 12        | 1.918351  | 1.747897  | 1.403367                         |
| 6         | -1.904595 | 0.233166  | -1.175656                        |
| 6         | -1.945663 | -1.357858 | 0.488685                         |
| 16        |           |           |                                  |
| 67.926907 | Kcal/mol  | 2.945593  | eV -101.275432 H Child_13_26.log |
| 8         | 3.242611  | 1.470223  | -0.708264                        |
| 12        | 0.148723  | -0.279614 | 1.187268                         |
| 12        | 1.519106  | 2.290416  | -0.111383                        |
| 6         | -2.248573 | -1.262818 | -0.072868                        |
| 6         | 2.857662  | 0.421273  | 0.085956                         |
| 6         | -1.240570 | -2.000189 | -0.016746                        |
| 6         | -0.576247 | 1.770222  | -0.258768                        |
| 6         | 1.980367  | 0.589042  | 1.145622                         |
| 6         | 2.444129  | -2.070735 | -0.522337                        |
| 6         | -2.669556 | 0.103266  | -0.116476                        |
| 6         | 2.954078  | -0.940387 | -0.311777                        |
| 6         | -0.008108 | -2.546185 | -0.112928                        |
| 6         | 1.215596  | -2.585918 | -0.389339                        |
| 6         | -3.961495 | 0.451939  | -0.179169                        |
| 6         | -1.615928 | 1.081864  | -0.140038                        |

|           |           |           |                                  |
|-----------|-----------|-----------|----------------------------------|
| 8         | -5.092869 | 0.755046  | -0.238912                        |
| 16        |           |           |                                  |
| 67.983270 | Kcal/mol  | 2.948037  | eV -101.275342 H MutD_13_74.log  |
| 8         | -3.562198 | -2.465230 | 0.001156                         |
| 6         | 6.015104  | -0.125431 | 0.055877                         |
| 6         | -1.003199 | -2.182704 | -0.044285                        |
| 6         | 0.093251  | 1.875736  | -0.065605                        |
| 6         | -1.166790 | 2.375409  | -0.044079                        |
| 6         | -2.375644 | 2.664299  | -0.012906                        |
| 12        | -4.160415 | 1.731086  | 0.059544                         |
| 6         | 1.170897  | 1.267077  | -0.075018                        |
| 6         | 2.193952  | 0.333646  | -0.064837                        |
| 6         | 3.489306  | 0.264921  | -0.008800                        |
| 6         | -4.235315 | -1.298295 | 0.049159                         |
| 6         | 4.757896  | 0.071973  | 0.061818                         |
| 8         | 7.192072  | -0.315049 | 0.067636                         |
| 6         | -2.220324 | -2.356134 | -0.016394                        |
| 6         | -4.757580 | -0.182100 | 0.078104                         |
| 12        | 0.759721  | -1.231766 | -0.061922                        |
| 16        |           |           |                                  |
| 68.178178 | Kcal/mol  | 2.956489  | eV -101.275032 H Child_10_45.log |
| 6         | -1.203740 | -2.915854 | 0.056051                         |
| 6         | -0.238269 | 2.917437  | -0.316616                        |
| 6         | -0.031119 | -3.309478 | -0.078860                        |
| 6         | -1.565169 | 2.871380  | -0.161069                        |
| 6         | -2.423401 | -2.321551 | 0.183718                         |
| 6         | 0.842771  | 2.232529  | -0.419070                        |
| 6         | -3.372212 | -1.552059 | 0.272642                         |
| 6         | -2.810593 | 2.759338  | -0.003487                        |
| 12        | 1.804261  | -2.566986 | -0.329500                        |
| 6         | 1.931890  | 1.555230  | -0.520750                        |
| 8         | -4.282526 | -0.633907 | 0.346519                         |
| 8         | 5.726768  | 1.223546  | 0.947730                         |
| 6         | 6.076720  | 0.214343  | 0.526967                         |
| 6         | 2.477167  | 0.338093  | -0.540921                        |
| 6         | 2.921289  | -0.845537 | -0.535732                        |
| 12        | -4.069756 | 1.201958  | 0.235231                         |
| 16        |           |           |                                  |
| 68.728595 | Kcal/mol  | 2.980358  | eV -101.274155 H MutD_13_46.log  |
| 6         | 3.196703  | 1.010546  | -0.296455                        |
| 6         | -1.400787 | -2.442453 | -0.737212                        |
| 8         | 4.106871  | 1.825216  | -0.115018                        |
| 12        | -3.330319 | -0.760964 | -0.129315                        |
| 6         | 0.656759  | 1.302640  | -1.187212                        |
| 6         | 0.958390  | -2.075540 | 0.231096                         |
| 6         | 2.510592  | -0.237202 | -0.095117                        |
| 6         | -2.569256 | -2.429062 | -1.141920                        |
| 6         | -0.144944 | -2.336641 | -0.241857                        |
| 6         | -0.384453 | 1.985563  | -1.154165                        |
| 12        | -1.729691 | 2.536106  | 0.280758                         |
| 6         | 2.195698  | -1.487133 | 0.623030                         |
| 6         | 1.866078  | 0.740372  | -0.831325                        |
| 6         | -3.371019 | 1.021022  | 0.825336                         |
| 6         | -2.757487 | 1.530287  | 1.804902                         |
| 8         | 2.915939  | -1.924729 | 1.538527                         |

16  
69.921380 Kcal/mol 3.032082 eV -101.272254 H Child\_11\_10.log  
6 5.080991 0.887719 -0.725130  
8 -5.206863 -1.188740 -0.804053  
12 3.131164 1.784724 -0.300975  
6 0.180177 -2.313198 0.130489  
8 -3.404462 2.275991 0.564482  
6 -4.185068 -0.728624 -0.422407  
6 1.159414 1.842003 0.180479  
6 -0.773522 -1.530331 0.010191  
6 3.723704 -1.187387 0.146466  
6 -1.623715 -0.423678 0.028910  
6 -3.080894 -0.156921 -0.019583  
6 -2.733252 1.297310 0.302434  
12 2.169706 -2.470860 0.502511  
6 -0.029148 1.510668 0.276791  
6 -1.282259 0.911676 0.241405  
6 4.443598 -0.186634 -0.233689

16  
70.346836 Kcal/mol 3.050531 eV -101.271576 H Child\_1\_30.log  
8 5.982344 -0.441970 0.660367  
6 -2.200976 1.491014 -1.672365  
6 -0.762512 -2.980543 0.784581  
6 -1.071038 0.953747 -1.561610  
6 -1.924740 -2.539866 0.935345  
12 -3.722769 0.708664 -0.536188  
6 4.941364 -0.127919 0.147890  
8 -0.807035 3.392172 1.729853  
6 -3.058677 -1.771787 0.913677  
6 1.370493 0.474785 -1.095622  
12 0.333314 -1.681861 -0.311330  
6 -3.897965 -0.872392 0.723950  
6 3.855068 0.253779 -0.407685  
6 2.613776 0.386300 -0.773512  
6 -0.049427 2.531001 1.751274  
6 0.063134 0.214672 -1.237847

16  
70.691691 Kcal/mol 3.065486 eV -101.271026 H MutD\_18\_68.log  
6 -2.616242 -2.029423 1.015404  
6 1.511099 2.946908 1.395198  
8 2.656719 -3.392955 -1.015715  
6 3.016026 -0.016974 -0.015625  
12 -0.062892 2.350075 0.169964  
6 -1.831001 2.157867 -0.998433  
6 2.118123 -1.032528 -0.378126  
6 -1.820687 -1.392780 0.220640  
6 -2.580159 3.136683 -1.345243  
12 -2.386273 0.206045 -1.021409  
6 0.707145 -0.763893 -0.142059  
6 2.999727 1.108578 0.601123  
6 -0.461286 -1.205709 0.127835  
6 2.436658 -2.266566 -0.735977  
6 2.505067 2.207342 1.153146  
8 -3.471324 -2.578355 1.619469



```

70.822120 Kcal/mol 3.071142 eV -101.270818 H Child_9_18.log
8 4.114239 -1.527527 1.252840
12 -2.770117 1.458208 0.435228
6 3.420593 -0.816511 0.516728
6 -3.054694 0.136035 1.991697
6 3.458918 0.653458 0.405039
6 -0.852951 1.985573 -0.444033
6 2.866446 1.666414 0.020475
6 -2.498051 -2.353250 -0.852026
6 2.349721 -1.232365 -0.327348
6 -2.802177 -1.752715 0.216624
6 1.710624 2.244375 -0.352862
6 -3.069280 -0.870618 1.216918
6 1.292319 -1.365145 -0.962473
6 0.500849 2.273693 -0.617904
12 -0.761386 -1.235724 -1.123660
8 -1.308722 0.767093 -0.828319
16
70.994065 Kcal/mol 3.078598 eV -101.270544 H Child_12_34.log
6 3.371098 -5.379903 -0.092390
12 2.017234 1.543811 1.795007
8 4.225922 -4.978902 0.566117
8 -8.084570 -0.593963 -0.231650
6 3.728460 1.069379 -2.222413
6 -6.903363 -0.427630 -0.122165
6 4.121431 1.548197 -1.126157
6 -5.648264 -0.239289 -0.011799
12 1.800372 0.779902 -1.527721
6 -4.382098 -0.020255 0.061310
6 4.187216 1.963760 0.185058
6 -3.125087 0.186176 0.176669
6 3.906007 2.251884 1.373462
6 -1.855453 0.375993 0.240620
6 0.694328 0.861555 0.277231
6 -0.584625 0.593193 0.280045
16
71.286461 Kcal/mol 3.091277 eV -101.270078 H Child_4_24.log
12 4.866267 -0.533847 -0.118539
6 -2.063884 1.923494 -0.027439
6 1.607486 -1.461028 -0.394084
6 -0.841139 1.934396 0.271661
6 0.459352 -1.921830 -0.327689
6 0.465377 1.660158 0.415616
6 -0.845497 -2.232165 -0.172006
6 1.654243 1.324416 0.350249
6 2.848176 0.620787 0.114944
6 -3.217785 2.393070 -1.074666
6 -2.036245 -2.260852 0.158705
6 -3.534869 1.648974 -0.023121
6 2.754250 -0.727092 -0.270049
12 -4.008214 -0.332647 0.197757
8 -3.312375 -2.072192 0.341895
8 4.088196 1.195187 0.272688
16
71.638717 Kcal/mol 3.106553 eV -101.269517 H Child_11_18.log

```

|           |           |           |                                  |
|-----------|-----------|-----------|----------------------------------|
| 6         | 1.826788  | -1.510369 | -1.481878                        |
| 6         | -1.857700 | 2.800272  | -0.621776                        |
| 6         | 5.584972  | -1.532532 | 0.972534                         |
| 6         | -0.681554 | 3.002461  | -0.191800                        |
| 8         | 4.571494  | -1.125089 | 0.607489                         |
| 6         | 0.538512  | 3.247439  | 0.304352                         |
| 6         | 0.603883  | -1.714241 | -1.313108                        |
| 6         | 1.487940  | 2.361608  | 0.649066                         |
| 12        | 2.800283  | -0.260730 | -0.199104                        |
| 12        | -2.841027 | 1.023612  | -0.474534                        |
| 6         | -0.717936 | -1.716989 | -0.993671                        |
| 6         | -1.825126 | -1.474576 | -0.501390                        |
| 6         | -3.935079 | -1.507077 | 0.824203                         |
| 6         | 2.401959  | 1.500601  | 0.802599                         |
| 6         | -2.994310 | -0.989396 | 0.082292                         |
| 8         | -4.834641 | -1.869635 | 1.504403                         |
| 16        |           |           |                                  |
| 71.641875 | Kcal/mol  | 3.106690  | eV -101.269512 H MutD_8_72.log   |
| 6         | 1.992461  | 1.412765  | -0.042812                        |
| 6         | 3.116379  | -0.763856 | -0.308951                        |
| 12        | -0.335025 | 2.301986  | -0.955521                        |
| 6         | 1.570155  | 2.596981  | -0.211197                        |
| 12        | 1.332326  | 0.432612  | 2.161967                         |
| 6         | -0.683874 | 0.498045  | 2.024419                         |
| 6         | -1.638456 | -0.110148 | 1.516586                         |
| 8         | 4.608598  | -2.497228 | -1.259824                        |
| 6         | -3.040205 | -0.397478 | -0.580507                        |
| 6         | -2.124618 | 1.706104  | -1.763293                        |
| 8         | -3.804276 | -2.836094 | -0.156095                        |
| 6         | -2.747852 | 0.715127  | -1.361870                        |
| 6         | 3.852749  | -1.699677 | -0.781109                        |
| 6         | -3.297644 | -1.732100 | -0.068501                        |
| 6         | -2.530530 | -0.731523 | 0.653768                         |
| 6         | 2.464403  | 0.147658  | 0.398469                         |
| 16        |           |           |                                  |
| 71.795080 | Kcal/mol  | 3.113333  | eV -101.269268 H Child_5_59.log  |
| 6         | -1.187693 | 3.072565  | -0.919095                        |
| 12        | -1.843985 | -2.529200 | 0.494812                         |
| 6         | 0.025225  | 3.208869  | -1.236917                        |
| 6         | -0.640266 | -3.134498 | -0.988993                        |
| 6         | 4.059909  | 0.441618  | 2.024870                         |
| 6         | -1.897061 | 0.290161  | 0.749151                         |
| 6         | 3.539281  | 0.369509  | 0.829194                         |
| 6         | 0.470926  | -2.660087 | -1.225998                        |
| 6         | -2.213886 | 2.420326  | -0.303572                        |
| 6         | 1.618739  | -1.939047 | -1.187779                        |
| 12        | 0.848938  | 1.450420  | -0.193373                        |
| 6         | 2.315718  | -0.956642 | -0.856284                        |
| 6         | -2.608375 | 1.470078  | 0.397995                         |
| 8         | -0.599503 | 0.356212  | 0.656488                         |
| 6         | 2.604256  | 0.212514  | -0.164734                        |
| 8         | -2.473008 | -0.834566 | 1.052974                         |
| 16        |           |           |                                  |
| 71.856196 | Kcal/mol  | 3.115984  | eV -101.269170 H Child_16_15.log |
| 8         | -6.396927 | -0.507156 | -0.951685                        |

|           |           |           |                                 |
|-----------|-----------|-----------|---------------------------------|
| 6         | 3.395022  | -0.506729 | -0.757474                       |
| 6         | -5.296500 | -0.315962 | -0.545316                       |
| 12        | 3.355979  | 1.544466  | -0.467389                       |
| 6         | -4.119608 | -0.115538 | -0.090497                       |
| 6         | 3.637898  | -1.758115 | -1.494035                       |
| 6         | -2.890988 | 0.001273  | 0.248696                        |
| 6         | 2.701332  | -1.633433 | -0.413282                       |
| 6         | -1.636460 | 0.182925  | 0.572247                        |
| 8         | 1.824277  | -3.212990 | 1.117815                        |
| 6         | -0.547568 | -0.684408 | 0.527725                        |
| 6         | 1.662116  | -2.165866 | 0.453687                        |
| 6         | 0.468573  | -1.378542 | 0.507473                        |
| 6         | 2.267537  | 3.199795  | -0.074321                       |
| 12        | -0.671469 | 2.057632  | 0.753142                        |
| 6         | 1.086493  | 2.930599  | 0.272085                        |
| 16        |           |           |                                 |
| 71.862900 | Kcal/mol  | 3.116274  | eV -101.269160 H MutI_9_73.log  |
| 6         | -1.358622 | 2.045876  | -1.182278                       |
| 6         | 0.598932  | 2.232000  | 0.172660                        |
| 6         | 1.980577  | 1.906847  | 0.193292                        |
| 12        | 2.188517  | -1.729593 | -0.342357                       |
| 6         | -2.145156 | -2.536632 | 0.031168                        |
| 8         | -1.249985 | 1.082865  | 1.460488                        |
| 6         | -0.336125 | 2.694446  | -0.880975                       |
| 6         | 3.693953  | 0.000993  | 0.174156                        |
| 6         | 2.945978  | 1.147215  | 0.250281                        |
| 6         | 0.425888  | -2.690672 | -0.239286                       |
| 8         | -2.278914 | 1.182680  | -1.112766                       |
| 6         | 4.227514  | -1.117275 | -0.070703                       |
| 12        | -2.694637 | -0.027906 | 0.343112                        |
| 6         | -0.236585 | 1.604240  | 1.007958                        |
| 6         | -0.810632 | -2.787180 | -0.165093                       |
| 6         | -3.268281 | -2.005589 | 0.243680                        |
| 16        |           |           |                                 |
| 72.032233 | Kcal/mol  | 3.123617  | eV -101.268890 H Child_2_39.log |
| 8         | 4.406189  | -0.533755 | 0.528253                        |
| 8         | -5.115344 | -0.719116 | 0.088286                        |
| 12        | 2.011089  | 2.565090  | -0.379566                       |
| 6         | -3.965160 | -0.420259 | 0.045853                        |
| 6         | 3.199129  | -0.627392 | 0.218156                        |
| 6         | -2.744163 | 0.022218  | 0.009033                        |
| 6         | -0.012516 | 1.689339  | -0.226009                       |
| 12        | -1.996926 | 1.948857  | 0.511474                        |
| 6         | 2.336217  | 0.528638  | -0.017381                       |
| 6         | -1.455206 | -0.587359 | -0.212327                       |
| 6         | 1.423026  | -2.518813 | -0.061074                       |
| 6         | -1.007400 | -1.934345 | -0.206632                       |
| 6         | 0.986279  | 0.580206  | -0.113900                       |
| 6         | 0.084643  | -2.526168 | -0.233126                       |
| 6         | 2.461378  | -1.859602 | 0.071652                        |
| 6         | -0.389015 | 0.296138  | -0.360110                       |
| 16        |           |           |                                 |
| 72.078132 | Kcal/mol  | 3.125608  | eV -101.268817 H Child_6_62.log |
| 8         | -3.424014 | -0.192081 | 0.063363                        |
| 6         | 3.245694  | 1.378423  | 0.247593                        |

|           |           |           |                                 |
|-----------|-----------|-----------|---------------------------------|
| 6         | -3.105895 | 1.017341  | -0.194181                       |
| 6         | 3.708579  | 0.113294  | 0.047234                        |
| 12        | -1.885537 | -1.271144 | 0.585521                        |
| 6         | 3.631474  | -1.115246 | -0.207475                       |
| 6         | -2.610818 | 2.145949  | -0.358226                       |
| 6         | 2.265620  | 2.143360  | 0.212891                        |
| 8         | -1.246490 | -3.126632 | -0.084872                       |
| 6         | 0.856989  | 2.075838  | 0.099360                        |
| 6         | -1.425576 | 2.788285  | -0.402101                       |
| 12        | 1.656605  | -1.760198 | -0.247789                       |
| 6         | -0.145492 | -3.312643 | -0.562980                       |
| 6         | 0.428073  | 0.754748  | 0.297415                        |
| 6         | -0.193253 | 2.942279  | -0.261875                       |
| 6         | 0.029809  | -0.443991 | 0.435559                        |
| 16        |           |           |                                 |
| 72.383150 | Kcal/mol  | 3.138834  | eV -101.268331 H Child_9_30.log |
| 6         | 2.883795  | -2.259558 | -0.226460                       |
| 6         | -1.822356 | 2.805457  | -0.317698                       |
| 12        | 4.399391  | -0.914604 | 0.041245                        |
| 6         | -1.754340 | 1.371565  | -0.152994                       |
| 6         | 1.642180  | -2.340621 | -0.184946                       |
| 6         | -0.568580 | 2.072319  | -0.185224                       |
| 6         | 0.294003  | -2.185326 | -0.118646                       |
| 8         | -4.977136 | 0.278083  | 0.195545                        |
| 6         | 4.466881  | 1.066605  | 0.316175                        |
| 6         | -3.855144 | -0.032128 | 0.110368                        |
| 6         | -0.883084 | -1.842257 | -0.043153                       |
| 6         | -2.445190 | 0.163116  | -0.020554                       |
| 6         | 3.442049  | 1.783503  | 0.229479                        |
| 12        | 1.474262  | 2.265644  | -0.012211                       |
| 6         | -2.133771 | -1.227389 | 0.040972                        |
| 8         | -3.283176 | -1.836108 | 0.175415                        |
| 16        |           |           |                                 |
| 72.595061 | Kcal/mol  | 3.148024  | eV -101.267993 H Child_9_63.log |
| 8         | -3.629976 | 0.952350  | -1.932031                       |
| 8         | 6.133284  | 0.342488  | -0.143097                       |
| 6         | 4.977829  | 0.083397  | -0.140279                       |
| 6         | -3.352822 | 0.775757  | -0.763979                       |
| 6         | 3.696909  | -0.034499 | -0.071159                       |
| 6         | -3.425252 | 0.835479  | 1.459915                        |
| 6         | 2.681596  | -0.976334 | -0.217130                       |
| 6         | -3.610236 | -0.152287 | 0.376345                        |
| 12        | 2.044776  | 1.193809  | 0.311807                        |
| 6         | -2.572463 | 1.341737  | 0.355814                        |
| 6         | 1.554572  | -1.482481 | -0.401867                       |
| 6         | -3.190237 | -1.496347 | 0.380980                        |
| 6         | 0.049090  | 1.605418  | 0.440435                        |
| 6         | -1.191033 | 1.572817  | 0.394367                        |
| 12        | -0.358829 | -1.892897 | -0.036415                       |
| 6         | -2.327590 | -2.400932 | 0.402609                        |
| 16        |           |           |                                 |
| 73.351878 | Kcal/mol  | 3.180843  | eV -101.266787 H Child_6_38.log |
| 8         | -5.419033 | -0.288300 | 1.651426                        |
| 8         | 4.165982  | 1.918374  | 1.516843                        |
| 6         | -4.404450 | -0.328467 | 1.121136                        |

|           |           |           |                                 |
|-----------|-----------|-----------|---------------------------------|
| 6         | 3.503047  | 1.065896  | 1.026938                        |
| 12        | 0.910106  | -2.577323 | -0.623425                       |
| 6         | 2.710968  | 0.220736  | 0.359138                        |
| 12        | -2.477187 | -0.233143 | -0.153726                       |
| 6         | 1.318055  | 0.589060  | 0.024294                        |
| 6         | -2.828467 | 1.420616  | -1.383789                       |
| 6         | 0.318457  | -0.351885 | 0.214213                        |
| 6         | 2.928169  | -2.269617 | -0.532435                       |
| 6         | -1.642280 | 1.859144  | -1.408138                       |
| 6         | -0.625174 | -1.229203 | 0.089942                        |
| 6         | 3.039432  | -1.107528 | -0.071379                       |
| 6         | -0.296788 | 1.977010  | -1.301247                       |
| 6         | 0.783926  | 1.601739  | -0.808730                       |
| 16        |           |           |                                 |
| 73.615148 | Kcal/mol  | 3.192259  | eV -101.266367 H Child_5_50.log |
| 6         | -2.934463 | 2.470635  | -0.433227                       |
| 8         | 3.932737  | -1.293439 | 1.803401                        |
| 6         | -1.881708 | 3.038567  | -0.046382                       |
| 6         | 2.853762  | -0.794032 | 1.552529                        |
| 6         | -3.904150 | 1.593310  | -0.697686                       |
| 6         | 9.607453  | 0.450246  | -1.228519                       |
| 6         | -4.600356 | 0.559605  | -0.784937                       |
| 8         | 8.934294  | -0.269447 | -1.819282                       |
| 12        | -0.217526 | 2.229196  | 0.753663                        |
| 6         | 1.682158  | -0.391179 | 1.237980                        |
| 6         | -4.994666 | -0.777742 | -0.780928                       |
| 6         | -0.487751 | -0.587479 | 0.367044                        |
| 6         | -5.032171 | -2.033403 | -0.614357                       |
| 6         | -1.471965 | -1.186465 | -0.016908                       |
| 12        | -3.052338 | -2.466103 | -0.461738                       |
| 6         | 0.547545  | 0.215599  | 0.882715                        |
| 16        |           |           |                                 |
| 73.705860 | Kcal/mol  | 3.196193  | eV -101.266223 H MutI_13_43.log |
| 6         | -0.008670 | 2.677008  | -0.169355                       |
| 6         | -1.287963 | 2.941715  | -0.123654                       |
| 6         | -0.482109 | -2.642166 | -0.124419                       |
| 12        | -3.485900 | -1.565718 | -0.303483                       |
| 12        | 2.163573  | -1.605089 | 0.473479                        |
| 6         | 2.071545  | 1.351371  | 0.287316                        |
| 6         | 2.763615  | 0.336211  | 0.529174                        |
| 8         | 0.807080  | -2.765228 | 0.017105                        |
| 6         | -5.143750 | -0.281639 | -0.024490                       |
| 6         | -2.468245 | 2.402471  | 0.048081                        |
| 6         | -4.423705 | 0.763572  | 0.139709                        |
| 6         | -1.701235 | -2.417937 | -0.189986                       |
| 6         | -3.561857 | 1.783955  | 0.141186                        |
| 6         | 1.202963  | 2.343238  | -0.001613                       |
| 8         | 5.835739  | 0.125858  | -0.229147                       |
| 6         | 6.826974  | 0.602976  | -0.569217                       |
| 16        |           |           |                                 |
| 74.144800 | Kcal/mol  | 3.215227  | eV -101.265523 H MutI_10_67.log |
| 6         | 3.459117  | 2.262776  | 0.030653                        |
| 6         | -2.198863 | 0.904142  | -0.222753                       |
| 12        | -4.254833 | 0.815239  | 0.240797                        |
| 6         | -0.075321 | 2.411721  | -0.136507                       |

|                                                              |           |           |           |
|--------------------------------------------------------------|-----------|-----------|-----------|
| 6                                                            | 1.092920  | 2.875278  | -0.144268 |
| 6                                                            | -1.157098 | 1.638180  | -0.180174 |
| 6                                                            | 4.188849  | 1.152355  | 0.157094  |
| 6                                                            | 3.762237  | -1.370431 | 0.228586  |
| 6                                                            | 1.763568  | -2.967702 | 0.072241  |
| 6                                                            | 2.419069  | 2.959057  | -0.085326 |
| 6                                                            | 4.173653  | -0.103118 | 0.222095  |
| 12                                                           | -1.808800 | -1.225820 | -0.432064 |
| 8                                                            | -0.713634 | -2.757351 | -0.157477 |
| 8                                                            | -5.858901 | -0.011979 | 0.401757  |
| 6                                                            | 0.537505  | -2.960601 | -0.048117 |
| 6                                                            | 2.925008  | -2.288057 | 0.163303  |
| 16                                                           |           |           |           |
| 75.167739 Kcal/mol 3.259586 eV -101.263893 H Child_14_28.log |           |           |           |
| 6                                                            | -3.632281 | 0.504623  | 0.588684  |
| 6                                                            | 3.739436  | 1.770252  | -0.146421 |
| 6                                                            | -3.555161 | -0.673010 | 0.229623  |
| 6                                                            | 3.177312  | 0.624383  | 0.511258  |
| 6                                                            | -2.910743 | -1.790149 | -0.188581 |
| 6                                                            | 2.932414  | -0.576411 | 1.104103  |
| 6                                                            | -3.092201 | 1.753074  | 0.681813  |
| 6                                                            | 2.404347  | 1.328169  | -0.457728 |
| 6                                                            | -1.983277 | -2.527080 | -0.607336 |
| 6                                                            | 2.190593  | -1.568821 | 0.959642  |
| 6                                                            | -2.278510 | 2.697416  | 0.595574  |
| 6                                                            | 1.093785  | 1.044683  | -0.848261 |
| 8                                                            | 0.814597  | -0.183598 | -1.244939 |
| 12                                                           | -0.478286 | 2.435889  | -0.285190 |
| 8                                                            | 1.390387  | -2.498969 | 0.710983  |
| 12                                                           | -0.034560 | -1.941074 | -0.570024 |
| 16                                                           |           |           |           |
| 75.170461 Kcal/mol 3.259704 eV -101.263889 H Child_18_24.log |           |           |           |
| 6                                                            | -2.058402 | -2.507498 | 0.066232  |
| 8                                                            | 4.443437  | 0.156448  | -0.109420 |
| 12                                                           | -0.100944 | -3.002342 | 0.190128  |
| 12                                                           | -0.250806 | 2.729757  | 0.537351  |
| 6                                                            | -2.841137 | -1.547232 | 0.140255  |
| 6                                                            | 1.612649  | 2.025545  | 0.832080  |
| 6                                                            | -3.282472 | -0.240906 | 0.280908  |
| 6                                                            | 3.242197  | -0.006383 | 0.213479  |
| 6                                                            | 2.370425  | 1.089608  | 0.567057  |
| 6                                                            | -3.871820 | 0.946449  | 0.885511  |
| 8                                                            | 0.193666  | 0.499858  | -2.080208 |
| 6                                                            | -2.726247 | 0.968288  | -0.013061 |
| 6                                                            | 2.555531  | -1.270656 | 0.241493  |
| 6                                                            | -1.542923 | 1.509641  | -0.582845 |
| 6                                                            | -0.707159 | 0.925833  | -1.418311 |
| 6                                                            | 1.770055  | -2.222596 | 0.251747  |
| 16                                                           |           |           |           |
| 75.173807 Kcal/mol 3.259849 eV -101.263883 H Child_8_16.log  |           |           |           |
| 6                                                            | 1.347644  | -2.583221 | 0.636734  |
| 6                                                            | -1.576663 | 2.485900  | 0.276048  |
| 6                                                            | 0.218902  | -2.896408 | 0.281737  |
| 6                                                            | 0.988417  | 2.076101  | 0.588006  |
| 6                                                            | 2.435962  | -1.826273 | 0.941554  |

|                                                             |           |           |           |
|-------------------------------------------------------------|-----------|-----------|-----------|
| 6                                                           | -0.216893 | 2.318291  | 0.425782  |
| 6                                                           | -1.071723 | -2.874971 | -0.123187 |
| 6                                                           | -2.769798 | 3.301925  | 0.305419  |
| 6                                                           | 3.290039  | -0.937878 | 1.182647  |
| 6                                                           | -2.792186 | 1.863943  | 0.072988  |
| 6                                                           | 3.802738  | 0.599624  | -2.381559 |
| 12                                                          | 2.697440  | 0.943125  | 0.707766  |
| 6                                                           | -2.157628 | -2.425902 | -0.504124 |
| 12                                                          | -3.585001 | -0.020738 | -0.161140 |
| 8                                                           | 3.476049  | 1.050323  | -1.376877 |
| 8                                                           | -3.268817 | -1.759750 | -0.719596 |
| 16                                                          |           |           |           |
| 75.238541 Kcal/mol 3.262656 eV -101.263780 H Child_3_28.log |           |           |           |
| 12                                                          | 3.868863  | 1.862650  | 0.073836  |
| 8                                                           | -6.728777 | 0.610459  | 0.170529  |
| 8                                                           | 4.323304  | 0.074568  | -0.088615 |
| 6                                                           | -5.569580 | 0.333941  | 0.094386  |
| 6                                                           | 2.165793  | 2.895556  | 0.199803  |
| 6                                                           | -4.328727 | 0.052281  | 0.058377  |
| 6                                                           | 3.533704  | -0.949484 | -0.058883 |
| 6                                                           | -1.810584 | -0.414484 | -0.278032 |
| 6                                                           | 0.970207  | 2.539646  | 0.112626  |
| 6                                                           | -3.094346 | -0.272992 | -0.123557 |
| 6                                                           | 2.745436  | -1.874532 | 0.012262  |
| 6                                                           | 1.525509  | -2.596654 | 0.011349  |
| 6                                                           | -0.784226 | -1.339254 | -0.350084 |
| 12                                                          | -0.624588 | 1.320442  | -0.106496 |
| 6                                                           | 0.292800  | -1.945174 | -0.348125 |
| 6                                                           | 1.072761  | -3.708404 | 0.625981  |
| 16                                                          |           |           |           |
| 75.523092 Kcal/mol 3.274995 eV -101.263327 H MutI_14_65.log |           |           |           |
| 6                                                           | 3.560369  | 3.972618  | 0.000000  |
| 6                                                           | 2.077972  | -0.782605 | 0.000000  |
| 12                                                          | -1.787373 | -2.115207 | 0.000000  |
| 6                                                           | 2.156076  | 1.795314  | 0.000000  |
| 6                                                           | 1.239281  | -1.845696 | 0.000000  |
| 6                                                           | 4.145731  | 5.141238  | 0.000000  |
| 6                                                           | 2.951647  | 2.860343  | 0.000000  |
| 6                                                           | 2.396577  | 0.422918  | 0.000000  |
| 6                                                           | -1.974171 | 1.088679  | 0.000000  |
| 8                                                           | -5.218373 | -4.785880 | 0.000000  |
| 6                                                           | 0.214204  | -2.555344 | 0.000000  |
| 6                                                           | -4.262399 | -4.124035 | 0.000000  |
| 8                                                           | -3.281665 | -3.456497 | 0.000000  |
| 6                                                           | 4.651627  | 6.325491  | 0.000000  |
| 12                                                          | -0.000000 | 1.532261  | 0.000000  |
| 6                                                           | -2.248785 | -0.143193 | 0.000000  |
| 16                                                          |           |           |           |
| 75.568675 Kcal/mol 3.276972 eV -101.263254 H Child_1_49.log |           |           |           |
| 6                                                           | 3.231315  | 1.036153  | 0.069788  |
| 6                                                           | 0.230517  | -0.610041 | 1.941531  |
| 6                                                           | 4.179941  | 1.087778  | -0.805666 |
| 12                                                          | -1.175811 | 0.931392  | 2.041652  |
| 8                                                           | 5.025802  | 1.310689  | -1.616001 |
| 6                                                           | -0.171569 | -3.451936 | -0.717571 |

|           |           |           |                                 |
|-----------|-----------|-----------|---------------------------------|
| 6         | -2.563297 | 0.884629  | -1.384277                       |
| 6         | 1.320164  | -0.057994 | 1.420787                        |
| 6         | -3.352897 | 2.123178  | -1.508996                       |
| 12        | 0.244433  | -2.532795 | 1.078739                        |
| 6         | -1.520361 | -1.458560 | -1.728789                       |
| 8         | -2.241130 | 1.920652  | 0.898845                        |
| 6         | -2.638266 | 1.751462  | -0.330796                       |
| 6         | -2.039816 | -0.339568 | -1.720592                       |
| 6         | -0.828324 | -2.548713 | -1.297792                       |
| 6         | 2.302453  | 0.477965  | 0.777800                        |
| 16        |           |           |                                 |
| 76.133349 | Kcal/mol  | 3.301459  | eV -101.262354 H Child_1_21.log |
| 6         | -3.116671 | -0.438652 | -2.226069                       |
| 6         | 0.864800  | 2.416973  | 0.237218                        |
| 6         | -2.075115 | -0.823796 | -1.544471                       |
| 6         | -0.368169 | 2.474235  | 0.255111                        |
| 8         | -3.976196 | -1.680280 | 1.681383                        |
| 6         | 2.137441  | 1.986424  | 0.122778                        |
| 6         | 1.188222  | -1.991532 | -0.085604                       |
| 8         | -1.646661 | 2.330978  | 0.266646                        |
| 6         | 0.031037  | -1.599253 | -0.354307                       |
| 6         | 4.136146  | 0.378417  | 0.021834                        |
| 6         | -1.143238 | -0.985980 | -0.581952                       |
| 6         | 3.223800  | 1.396683  | 0.060245                        |
| 6         | -3.500871 | -0.726529 | 1.251489                        |
| 6         | 4.852182  | -0.665468 | 0.010859                        |
| 12        | -2.590972 | 0.774088  | -0.147443                       |
| 12        | 3.224761  | -1.918647 | 0.265191                        |
| 16        |           |           |                                 |
| 76.598991 | Kcal/mol  | 3.321651  | eV -101.261612 H MutD_14_50.log |
| 8         | -1.077626 | 1.828136  | -0.007607                       |
| 6         | 2.215193  | 2.231772  | -0.179850                       |
| 6         | -4.277622 | -0.655153 | 0.046278                        |
| 6         | -5.480410 | -0.254341 | 0.076271                        |
| 6         | -3.044744 | -1.050688 | -0.032210                       |
| 6         | 4.669082  | -0.152627 | 0.179939                        |
| 12        | 0.772780  | 0.734311  | -0.134280                       |
| 6         | 0.772774  | -1.440972 | -0.141946                       |
| 6         | 3.393098  | 1.770753  | -0.016607                       |
| 6         | -1.713445 | 2.783689  | 0.133129                        |
| 12        | 2.663538  | -2.149234 | 0.005580                        |
| 8         | -6.614008 | 0.129410  | 0.117564                        |
| 6         | -1.823944 | -1.371225 | -0.117532                       |
| 6         | 4.623595  | 1.204755  | 0.071589                        |
| 6         | -0.513740 | -1.427345 | -0.139852                       |
| 6         | 4.563040  | -1.418834 | 0.231581                        |
| 16        |           |           |                                 |
| 77.134149 | Kcal/mol  | 3.344858  | eV -101.260759 H MutD_17_32.log |
| 6         | 3.721587  | 1.061815  | 0.162328                        |
| 12        | 1.131818  | -2.281583 | -0.151973                       |
| 6         | -5.892535 | -1.112834 | 0.381446                        |
| 6         | -3.314210 | -1.121259 | 0.082658                        |
| 6         | 3.764367  | -1.459828 | -0.062183                       |
| 6         | 1.822921  | 2.818706  | 0.287228                        |
| 8         | 0.232129  | -0.377142 | -0.048770                       |



|           |           |           |                                  |
|-----------|-----------|-----------|----------------------------------|
| 6         | -1.897227 | 2.313733  | -0.276620                        |
| 6         | -0.748085 | -1.382117 | -0.087845                        |
| 12        | 0.250952  | 1.523172  | 0.100767                         |
| 6         | 3.166574  | -2.555340 | -0.154110                        |
| 8         | -2.933021 | 2.741004  | -0.481067                        |
| 6         | 4.022278  | -0.128649 | 0.044786                         |
| 6         | -4.615644 | -1.100256 | 0.210537                         |
| 6         | 2.858381  | 2.111731  | 0.243778                         |
| 6         | -2.052759 | -1.080696 | -0.023143                        |
| 16        |           |           |                                  |
| 77.269872 | Kcal/mol  | 3.350743  | eV -101.260543 H Child_8_15.log  |
| 12        | 2.011409  | 3.034310  | 0.061590                         |
| 6         | -5.621413 | -1.075037 | -0.044147                        |
| 6         | 0.079596  | 3.588775  | 0.466872                         |
| 6         | -4.377087 | -0.742171 | -0.020266                        |
| 6         | 2.969886  | 1.397243  | -0.472254                        |
| 6         | -3.061887 | -0.404332 | -0.007952                        |
| 6         | -0.944616 | 2.881948  | 0.420500                         |
| 6         | -1.993929 | -1.332695 | -0.189961                        |
| 6         | 2.753670  | 0.228714  | -0.846021                        |
| 6         | -0.938600 | -1.953399 | -0.365857                        |
| 6         | 3.122994  | -2.505920 | 1.859218                         |
| 6         | -2.580698 | 0.913727  | 0.178114                         |
| 6         | -1.901537 | 1.928369  | 0.315828                         |
| 8         | 2.283111  | -2.629310 | 1.072040                         |
| 12        | 1.070798  | -2.084227 | -0.633556                        |
| 8         | 2.463795  | -0.989732 | -1.184646                        |
| 16        |           |           |                                  |
| 77.447822 | Kcal/mol  | 3.358460  | eV -101.260260 H Child_7_26.log  |
| 8         | -5.145183 | -1.255341 | -0.387739                        |
| 6         | 2.205122  | 2.759384  | -0.226533                        |
| 6         | -4.041183 | -0.922523 | -0.183474                        |
| 6         | 3.174366  | 1.983663  | -0.189418                        |
| 6         | -2.775348 | -0.544894 | 0.023258                         |
| 6         | 4.030714  | 0.920540  | -0.080350                        |
| 6         | -1.706719 | -1.467405 | -0.009991                        |
| 6         | 4.594307  | -0.187743 | 0.004596                         |
| 6         | -0.639578 | -2.063333 | -0.002750                        |
| 12        | 3.692687  | -1.987036 | 0.094360                         |
| 8         | -3.307482 | 1.891171  | 0.416179                         |
| 6         | -1.342908 | 1.574473  | 0.301563                         |
| 6         | -2.471088 | 0.862448  | 0.237359                         |
| 6         | 1.837313  | -2.795417 | 0.110027                         |
| 6         | 0.627484  | -2.548677 | 0.039555                         |
| 12        | 0.196183  | 2.777891  | -0.125240                        |
| 16        |           |           |                                  |
| 77.578694 | Kcal/mol  | 3.364135  | eV -101.260051 H Child_11_46.log |
| 6         | 0.532696  | -1.282682 | -0.425228                        |
| 8         | -4.847484 | 0.983051  | -0.707753                        |
| 12        | 3.341897  | -0.642124 | -0.600150                        |
| 6         | -3.741099 | 0.903274  | -0.336281                        |
| 6         | 4.307321  | 1.123159  | -0.278729                        |
| 6         | -2.475419 | 0.693605  | 0.032895                         |
| 6         | 3.397705  | 1.885727  | 0.146842                         |
| 8         | -2.710939 | -1.730021 | 0.395647                         |

|                                                              |           |           |           |
|--------------------------------------------------------------|-----------|-----------|-----------|
| 6                                                            | 2.141199  | 2.356409  | 0.417989  |
| 6                                                            | -1.527280 | 1.710841  | 0.278125  |
| 6                                                            | -0.640517 | -0.843520 | -0.201023 |
| 6                                                            | -0.414647 | 2.168024  | 0.525272  |
| 6                                                            | -1.975337 | -0.727129 | 0.083695  |
| 6                                                            | 1.742775  | -1.890114 | -0.478601 |
| 6                                                            | 0.918300  | 2.441085  | 0.542529  |
| 12                                                           | 0.564203  | -3.129235 | 0.654478  |
| 16                                                           |           |           |           |
| 77.686168 Kcal/mol 3.368795 eV -101.259880 H Child_12_42.log |           |           |           |
| 8                                                            | -6.594055 | 0.780604  | 1.193649  |
| 8                                                            | 7.582896  | 0.613454  | 0.370022  |
| 6                                                            | -5.667708 | 0.452343  | 0.523946  |
| 6                                                            | 6.424367  | 0.327671  | 0.251491  |
| 6                                                            | -4.632758 | 0.102437  | -0.179910 |
| 12                                                           | 1.078113  | 1.021722  | -0.396753 |
| 6                                                            | 5.197299  | 0.036492  | 0.105451  |
| 6                                                            | -3.156966 | -0.079025 | -0.335894 |
| 6                                                            | -0.919472 | 1.313130  | -0.393683 |
| 6                                                            | 0.435922  | -1.686765 | 0.183257  |
| 6                                                            | 2.657103  | -0.356406 | -0.091220 |
| 12                                                           | -1.589563 | -1.473522 | 0.156295  |
| 6                                                            | 3.942345  | -0.228025 | 0.038350  |
| 6                                                            | -4.098679 | -0.434579 | -1.405430 |
| 6                                                            | -2.073377 | 0.840068  | -0.377741 |
| 6                                                            | 1.596369  | -1.242487 | 0.077404  |
| 16                                                           |           |           |           |
| 77.820950 Kcal/mol 3.374640 eV -101.259665 H MutI_2_75.log   |           |           |           |
| 6                                                            | -1.234726 | 1.897660  | 0.107373  |
| 6                                                            | 0.286978  | -1.868382 | 0.362470  |
| 6                                                            | -0.014035 | 1.747081  | 0.248871  |
| 8                                                            | 4.664775  | -1.959917 | -0.672109 |
| 12                                                           | 3.320605  | 2.093686  | 0.164237  |
| 6                                                            | 3.351682  | 0.064538  | -0.021591 |
| 6                                                            | 1.083132  | -0.934477 | 0.224595  |
| 6                                                            | -2.562415 | 1.764734  | -0.098979 |
| 6                                                            | -3.537433 | -1.699788 | 0.172845  |
| 6                                                            | 3.994710  | -1.025261 | -0.360666 |
| 12                                                           | -1.665734 | -2.327768 | 0.376485  |
| 8                                                            | -4.691558 | 0.508220  | -0.493423 |
| 6                                                            | -4.177400 | -0.712119 | -0.193655 |
| 6                                                            | -3.712385 | 1.451445  | -0.390304 |
| 6                                                            | 1.907266  | 0.218850  | 0.165532  |
| 6                                                            | 1.340596  | 1.499480  | 0.256105  |
| 16                                                           |           |           |           |
| 77.833793 Kcal/mol 3.375197 eV -101.259644 H MutI_10_75.log  |           |           |           |
| 6                                                            | -0.730915 | -2.842705 | -0.013667 |
| 8                                                            | -4.730970 | 1.204748  | -0.742185 |
| 12                                                           | 1.252942  | 2.075645  | -0.372080 |
| 8                                                            | -2.994949 | -2.142760 | -0.739563 |
| 6                                                            | 0.681860  | 0.260561  | 1.327423  |
| 12                                                           | 3.418110  | -0.680509 | 0.006200  |
| 6                                                            | -0.139911 | 1.336857  | 1.085809  |
| 6                                                            | 4.060869  | 0.857929  | -1.248775 |
| 6                                                            | 0.476810  | -2.381378 | 0.204323  |

|                                                              |           |           |           |
|--------------------------------------------------------------|-----------|-----------|-----------|
| 6                                                            | -2.641024 | 1.602112  | 0.554429  |
| 6                                                            | -1.912078 | -2.523181 | -0.423893 |
| 6                                                            | -1.433909 | 1.519502  | 0.964676  |
| 6                                                            | 2.986962  | 1.538900  | -1.149334 |
| 6                                                            | 1.701872  | -0.521155 | 1.215292  |
| 6                                                            | -3.719884 | 1.386802  | -0.103964 |
| 6                                                            | 1.628468  | -1.773833 | 0.295104  |
| 16                                                           |           |           |           |
| 77.923500 Kcal/mol 3.379087 eV -101.259502 H Child_12_60.log |           |           |           |
| 6                                                            | -2.525836 | -0.236319 | 1.073550  |
| 6                                                            | 0.581668  | 3.436842  | -0.354566 |
| 6                                                            | -2.039991 | 0.922496  | 0.690696  |
| 6                                                            | 0.375580  | -3.129496 | -0.832141 |
| 6                                                            | -2.120617 | -1.465950 | 1.112862  |
| 6                                                            | -0.468971 | 2.760389  | -0.136061 |
| 6                                                            | -1.464632 | 1.961003  | 0.258898  |
| 6                                                            | 4.036619  | -0.165038 | 0.192984  |
| 8                                                            | -4.964654 | 0.839725  | -0.395470 |
| 8                                                            | 5.137308  | -0.483848 | 0.576585  |
| 6                                                            | -1.716772 | -2.578379 | 0.617565  |
| 6                                                            | 2.836245  | 0.157155  | -0.216536 |
| 6                                                            | -4.861783 | -0.195962 | -0.930722 |
| 6                                                            | -0.642266 | -2.949673 | -0.092004 |
| 12                                                           | 2.133102  | 2.083972  | -0.111813 |
| 12                                                           | 1.757174  | -1.579758 | -0.701194 |
| 16                                                           |           |           |           |
| 78.091331 Kcal/mol 3.386365 eV -101.259234 H MutI_14_59.log  |           |           |           |
| 6                                                            | 2.491440  | 2.637839  | 0.383253  |
| 6                                                            | 4.243219  | 0.745182  | 0.729729  |
| 8                                                            | -5.711682 | -0.979219 | 1.296876  |
| 6                                                            | -0.585982 | -1.749579 | -0.778922 |
| 12                                                           | 4.092725  | -1.259748 | 0.463192  |
| 6                                                            | -1.611089 | -1.077592 | -0.873624 |
| 12                                                           | -1.920170 | 2.456737  | -0.451244 |
| 6                                                            | -0.002881 | 3.120946  | -0.143242 |
| 6                                                            | 1.217597  | 2.871025  | 0.084026  |
| 6                                                            | 3.364664  | 1.653210  | 0.545984  |
| 8                                                            | 3.074808  | -2.706373 | -0.104907 |
| 6                                                            | -6.591016 | -1.641831 | 0.986090  |
| 6                                                            | -2.532535 | -0.074317 | -0.852818 |
| 6                                                            | 0.627085  | -2.316927 | -0.592534 |
| 6                                                            | -3.262401 | 0.931999  | -0.716111 |
| 6                                                            | 1.812621  | -2.579809 | -0.385019 |
| 16                                                           |           |           |           |
| 78.393821 Kcal/mol 3.399482 eV -101.258752 H Child_7_53.log  |           |           |           |
| 6                                                            | -4.905441 | 0.232706  | 0.944455  |
| 12                                                           | -0.109777 | -1.106709 | -0.618335 |
| 12                                                           | -4.445985 | 2.119539  | 0.336269  |
| 6                                                            | 6.842205  | 0.645309  | 0.346229  |
| 6                                                            | -3.869402 | -0.372692 | 0.570233  |
| 6                                                            | 2.019258  | -0.803022 | -0.480169 |
| 6                                                            | -2.735049 | 2.701981  | -0.670907 |
| 6                                                            | 3.243609  | -0.594147 | -0.260723 |
| 6                                                            | -2.598042 | -0.720662 | 0.052386  |
| 6                                                            | 5.666791  | 0.154780  | 0.168703  |

|                                                              |           |           |           |
|--------------------------------------------------------------|-----------|-----------|-----------|
| 6                                                            | -2.244777 | 1.535604  | -0.656390 |
| 6                                                            | -2.047882 | -2.093575 | 0.056650  |
| 6                                                            | -1.756717 | 0.230683  | -0.548178 |
| 6                                                            | 4.485003  | -0.242871 | -0.041365 |
| 8                                                            | -2.667913 | -3.124090 | 0.299875  |
| 8                                                            | 7.926888  | 1.099276  | 0.512529  |
| 16                                                           |           |           |           |
| 78.479852 Kcal/mol 3.403213 eV -101.258615 H MutD_14_38.log  |           |           |           |
| 6                                                            | -0.280666 | 2.847374  | -0.016536 |
| 6                                                            | 1.928836  | -1.252055 | -0.138489 |
| 12                                                           | -4.048950 | -1.005165 | 1.909194  |
| 6                                                            | -2.635279 | 0.114961  | -0.633813 |
| 6                                                            | 2.999290  | -0.346730 | 0.156573  |
| 6                                                            | 4.247349  | -0.810595 | 0.314737  |
| 6                                                            | -2.370020 | 1.483682  | -0.368534 |
| 6                                                            | 2.696391  | 1.037253  | 0.272311  |
| 6                                                            | 0.943489  | 2.890314  | 0.245933  |
| 12                                                           | -1.106563 | -1.750869 | -0.855757 |
| 6                                                            | -1.523963 | 2.371574  | -0.210132 |
| 8                                                            | -2.080169 | -0.323944 | -1.824512 |
| 6                                                            | 0.870850  | -1.839240 | -0.405232 |
| 6                                                            | -2.926116 | -0.977656 | 0.180218  |
| 6                                                            | 2.029958  | 2.070888  | 0.283953  |
| 8                                                            | 5.328349  | -1.234332 | 0.483617  |
| 16                                                           |           |           |           |
| 78.829249 Kcal/mol 3.418364 eV -101.258058 H Child_14_16.log |           |           |           |
| 8                                                            | -5.482101 | -0.811153 | -0.080431 |
| 8                                                            | 5.375779  | -1.354782 | -0.162748 |
| 6                                                            | -4.268083 | -0.637145 | -0.077196 |
| 6                                                            | 4.232262  | -1.122601 | -0.109235 |
| 6                                                            | -3.106303 | 0.190074  | -0.267691 |
| 6                                                            | 2.913340  | -0.797015 | -0.056013 |
| 12                                                           | -1.460885 | 1.444968  | -0.538426 |
| 6                                                            | 1.886518  | -1.721784 | 0.281278  |
| 12                                                           | 0.667693  | 3.801650  | 0.819410  |
| 6                                                            | 0.725321  | -2.098636 | 0.430526  |
| 6                                                            | -2.938732 | -1.147319 | 0.129793  |
| 6                                                            | 2.653928  | 0.544388  | -0.416493 |
| 6                                                            | 0.514597  | 2.042523  | -0.551086 |
| 6                                                            | -0.621502 | -2.193167 | 0.470099  |
| 6                                                            | -1.817320 | -1.911247 | 0.383576  |
| 6                                                            | 1.554120  | 1.246607  | -0.455289 |
| 16                                                           |           |           |           |
| 79.048568 Kcal/mol 3.427875 eV -101.257709 H MutD_4_70.log   |           |           |           |
| 6                                                            | 0.341827  | -2.227013 | 0.197231  |
| 6                                                            | -1.282233 | 1.460554  | 1.395662  |
| 6                                                            | 0.529395  | -1.950242 | -1.179917 |
| 6                                                            | -0.399746 | 2.434715  | 1.106940  |
| 8                                                            | 1.399490  | -2.311861 | 0.952467  |
| 6                                                            | 2.112132  | 1.172670  | -2.197097 |
| 6                                                            | 0.684872  | 2.925661  | 0.710073  |
| 6                                                            | -5.767664 | 0.522303  | -0.839503 |
| 6                                                            | 0.964324  | -1.071616 | -1.940771 |
| 12                                                           | 2.334996  | 1.970529  | -0.227606 |
| 6                                                            | -0.921737 | -1.975151 | 0.767144  |

|           |           |           |                                 |
|-----------|-----------|-----------|---------------------------------|
| 12        | 2.670512  | -0.738896 | 1.092319                        |
| 6         | 1.543700  | 0.069622  | -2.382347                       |
| 8         | -4.789774 | -0.064678 | -0.976292                       |
| 6         | -1.524551 | -0.973478 | 1.192569                        |
| 6         | -1.770957 | 0.317429  | 1.472353                        |
| 16        |           |           |                                 |
| 79.155890 | Kcal/mol  | 3.432529  | eV -101.257538 H Child_8_38.log |
| 6         | -7.898178 | -0.255887 | 0.425016                        |
| 8         | 4.426956  | 1.873102  | -0.535922                       |
| 6         | -6.621663 | -0.174667 | 0.245822                        |
| 6         | 3.448970  | 1.368493  | -0.172615                       |
| 6         | -5.330060 | -0.053519 | 0.074381                        |
| 8         | 5.912817  | -0.985852 | 0.686117                        |
| 12        | -1.047110 | -1.173879 | -0.640935                       |
| 6         | 4.760941  | -1.088188 | 0.368329                        |
| 6         | -4.075468 | 0.081796  | -0.072772                       |
| 12        | 1.259920  | 0.991449  | 0.261410                        |
| 6         | -1.793738 | 1.054966  | 0.061738                        |
| 6         | 0.968169  | -1.160831 | -0.277836                       |
| 6         | 2.234188  | -1.224487 | -0.119935                       |
| 6         | 3.550323  | -1.070175 | -0.030858                       |
| 6         | -0.695714 | 1.620990  | 0.288467                        |
| 6         | -2.759756 | 0.083370  | -0.230947                       |
| 16        |           |           |                                 |
| 79.268610 | Kcal/mol  | 3.437417  | eV -101.257358 H MutD_3_74.log  |
| 6         | 3.450386  | -1.455219 | 0.442093                        |
| 6         | 1.003934  | -2.151487 | -0.000403                       |
| 6         | -3.891481 | 1.209375  | 0.436725                        |
| 6         | 0.007071  | 1.694713  | -0.554143                       |
| 6         | 2.324681  | -1.832191 | 0.148562                        |
| 6         | -1.496431 | -1.505005 | -0.333886                       |
| 6         | -0.182208 | -1.915140 | -0.261400                       |
| 6         | -3.296471 | 0.153700  | -0.032123                       |
| 6         | 3.806126  | 1.736774  | -0.033408                       |
| 6         | -0.921873 | 0.881422  | -0.467965                       |
| 6         | 4.250795  | 0.616997  | 0.235927                        |
| 8         | 4.547775  | -0.671826 | 0.543907                        |
| 8         | -4.544603 | 2.104282  | 0.895633                        |
| 12        | 1.919437  | 2.304131  | -0.438668                       |
| 12        | -3.505035 | -1.897708 | -0.158160                       |
| 6         | -1.887563 | -0.156727 | -0.305708                       |
| 16        |           |           |                                 |
| 79.402249 | Kcal/mol  | 3.443212  | eV -101.257145 H Child_16_8.log |
| 6         | -3.621830 | -0.989250 | 0.298386                        |
| 6         | 5.755742  | 1.067136  | 0.319719                        |
| 6         | -2.887689 | -2.113226 | 0.063628                        |
| 6         | 4.484344  | 1.122147  | 0.132673                        |
| 6         | -3.832246 | 0.221528  | 0.407547                        |
| 6         | 3.185560  | 1.164101  | -0.060543                       |
| 6         | -1.960778 | -2.911134 | -0.210820                       |
| 6         | 1.936654  | 1.174953  | -0.233971                       |
| 6         | -3.554503 | 1.550319  | 0.397811                        |
| 8         | 2.863606  | -2.683364 | 0.594962                        |
| 6         | -2.997736 | 2.661999  | 0.303843                        |
| 6         | 0.593890  | 1.224216  | -0.351974                       |

|                                                              |           |           |           |
|--------------------------------------------------------------|-----------|-----------|-----------|
| 12                                                           | -0.298468 | -1.752668 | -0.498506 |
| 6                                                            | 1.843013  | -2.439772 | 0.143009  |
| 8                                                            | -0.119807 | 0.104253  | -0.580655 |
| 12                                                           | -1.002942 | 2.605567  | -0.115687 |
| 16                                                           |           |           |           |
| 79.461681 Kcal/mol 3.445789 eV -101.257050 H Child_13_13.log |           |           |           |
| 6                                                            | 0.684390  | -2.830480 | 0.061928  |
| 12                                                           | -3.041922 | 2.530223  | -0.042420 |
| 6                                                            | 1.768748  | -2.249769 | 0.087258  |
| 6                                                            | -4.597992 | 1.243126  | -0.101715 |
| 6                                                            | 5.921471  | 1.058151  | -0.247802 |
| 6                                                            | -1.036438 | 2.777877  | 0.182935  |
| 6                                                            | -0.655148 | -2.992050 | 0.025564  |
| 6                                                            | -4.397763 | 0.008281  | -0.095974 |
| 8                                                            | 4.779165  | 0.870824  | -0.157901 |
| 6                                                            | 0.203938  | 2.403821  | 0.130642  |
| 6                                                            | -1.878459 | -2.820063 | -0.012153 |
| 6                                                            | -3.893946 | -1.252088 | -0.079296 |
| 12                                                           | 2.761533  | 0.384279  | 0.031376  |
| 6                                                            | 1.362970  | 1.818126  | 0.194512  |
| 6                                                            | -3.045565 | -2.149537 | -0.050278 |
| 8                                                            | 2.814266  | -1.504123 | 0.102750  |
| 16                                                           |           |           |           |
| 79.593793 Kcal/mol 3.451518 eV -101.256840 H Child_1_48.log  |           |           |           |
| 8                                                            | 5.598555  | -0.785403 | 0.081721  |
| 6                                                            | -2.885076 | 2.426796  | 0.492936  |
| 6                                                            | -4.040493 | -1.674020 | 0.331629  |
| 6                                                            | -1.720155 | 2.073812  | 0.151510  |
| 6                                                            | 4.528353  | -0.351001 | 0.102011  |
| 6                                                            | -0.884886 | 1.042003  | -0.296311 |
| 6                                                            | 2.281632  | -0.912346 | 0.110329  |
| 8                                                            | -1.584653 | 0.036034  | -0.771889 |
| 6                                                            | 3.243363  | 0.135592  | 0.119556  |
| 6                                                            | 2.811762  | 1.495310  | 0.024604  |
| 6                                                            | -2.856959 | -2.121834 | 0.283551  |
| 6                                                            | 0.539561  | 0.800882  | -0.131666 |
| 6                                                            | 0.939733  | -0.611665 | 0.006045  |
| 6                                                            | 1.554031  | 1.741531  | -0.043641 |
| 12                                                           | -3.561669 | 0.293825  | -0.017075 |
| 12                                                           | -0.869698 | -1.816776 | -0.098089 |
| 16                                                           |           |           |           |
| 79.914445 Kcal/mol 3.465423 eV -101.256329 H Child_13_10.log |           |           |           |
| 8                                                            | 3.567043  | -3.302298 | 0.817128  |
| 6                                                            | -0.232995 | 3.478589  | -0.030433 |
| 6                                                            | 3.192884  | -2.242174 | 0.649382  |
| 8                                                            | 4.009509  | 2.305605  | -0.281443 |
| 6                                                            | 0.366659  | -2.203048 | -0.669852 |
| 6                                                            | 0.431473  | 2.208200  | -0.030857 |
| 6                                                            | -0.835846 | -2.516258 | -0.670956 |
| 6                                                            | 2.863904  | 1.990779  | -0.194496 |
| 6                                                            | -2.186486 | -2.445876 | -0.527196 |
| 6                                                            | -0.937433 | 2.184439  | 0.115829  |
| 6                                                            | -3.265842 | -1.912362 | -0.258102 |
| 6                                                            | 1.649237  | 1.488255  | -0.117137 |
| 12                                                           | 1.564021  | -0.613701 | -0.214652 |

|                                                                  |           |           |           |
|------------------------------------------------------------------|-----------|-----------|-----------|
| 12                                                               | -2.899396 | 1.583321  | 0.371730  |
| 6                                                                | -4.044276 | -0.874778 | 0.136253  |
| 6                                                                | -4.432597 | 0.233918  | 0.569162  |
| 16                                                               |           |           |           |
| 79.968907 Kcal/mol 3.467784 eV -101.256242 H Child_10_49.log     |           |           |           |
| 6                                                                | 0.873590  | -2.435886 | -0.497362 |
| 8                                                                | -0.278144 | 3.721694  | 0.380050  |
| 6                                                                | 1.220342  | -2.459266 | 0.693674  |
| 6                                                                | 0.418477  | 2.764015  | 0.213338  |
| 6                                                                | -0.000255 | -1.608727 | -1.278278 |
| 6                                                                | 1.009592  | 1.599886  | 0.153649  |
| 6                                                                | 1.072836  | -1.867583 | 1.889835  |
| 6                                                                | 2.295653  | 1.204436  | -0.299732 |
| 6                                                                | -1.140023 | -1.147374 | -0.880970 |
| 8                                                                | -4.525047 | 0.086146  | -0.454701 |
| 6                                                                | 3.294006  | 0.548282  | -0.763304 |
| 6                                                                | 0.514691  | -1.030227 | 2.681035  |
| 6                                                                | -3.396645 | -0.242494 | -0.425118 |
| 6                                                                | -2.129068 | -0.491765 | -0.269592 |
| 12                                                               | -0.361489 | 0.287572  | 1.246380  |
| 12                                                               | 1.547017  | -0.242781 | -1.805201 |
| 16                                                               |           |           |           |
| 80.945792 Kcal/mol 3.510146 eV -101.254685 H Child_8_14.log      |           |           |           |
| 12                                                               | 6.444191  | -1.315655 | -0.158595 |
| 6                                                                | -1.177806 | 3.405019  | -0.390647 |
| 6                                                                | 2.059389  | 0.861914  | 0.888987  |
| 6                                                                | -2.168439 | 2.828453  | -0.890562 |
| 6                                                                | 1.664533  | -0.386561 | 0.551841  |
| 12                                                               | -2.197907 | 0.778116  | -1.045159 |
| 6                                                                | 1.875258  | 2.086276  | 0.904839  |
| 6                                                                | 0.034310  | 3.589090  | 0.192222  |
| 8                                                                | -0.108350 | -3.134555 | -1.009341 |
| 8                                                                | -4.208048 | -2.183519 | 1.485094  |
| 6                                                                | 0.995335  | -1.320054 | 0.105535  |
| 6                                                                | -3.290225 | -1.815491 | 0.833731  |
| 6                                                                | 1.106497  | 3.168047  | 0.649949  |
| 6                                                                | -2.457330 | -1.179183 | 0.041508  |
| 6                                                                | -0.109143 | -1.992834 | -0.518230 |
| 6                                                                | -1.269751 | -1.078832 | -0.596002 |
| 16                                                               |           |           |           |
| 81.258784 Kcal/mol 3.523719 eV -101.254186 H Original3D_15_4.log |           |           |           |
| 6                                                                | -0.613805 | -0.001485 | 1.098323  |
| 6                                                                | 0.403210  | 2.179130  | -0.262486 |
| 6                                                                | 1.317436  | 1.214102  | 0.229895  |
| 6                                                                | -1.821433 | 0.029815  | 1.391146  |
| 6                                                                | 0.707297  | 0.016824  | 0.688262  |
| 8                                                                | -1.590918 | 1.259776  | -1.430729 |
| 6                                                                | -0.672187 | 1.874774  | -0.831690 |
| 6                                                                | -3.171722 | -0.014715 | 1.178673  |
| 12                                                               | -2.023054 | -0.550117 | -0.785180 |
| 6                                                                | 0.406087  | -1.922538 | -0.457475 |
| 6                                                                | 2.744703  | 1.211788  | 0.143825  |
| 6                                                                | -4.419290 | 0.021397  | 0.945136  |
| 6                                                                | 3.969668  | 0.943028  | 0.044173  |
| 12                                                               | 3.411161  | -1.019255 | 0.301262  |

|           |           |           |                                 |
|-----------|-----------|-----------|---------------------------------|
| 6         | 1.326402  | -1.317666 | 0.217016                        |
| 8         | -0.623518 | -2.081557 | -1.131992                       |
| 16        |           |           |                                 |
| 82.231359 | Kcal/mol  | 3.565894  | eV -101.252636 H Child_2_63.log |
| 6         | 3.182874  | 1.769059  | -0.420397                       |
| 6         | -9.012889 | 0.263919  | 0.250568                        |
| 6         | 1.932796  | 1.764330  | -0.237987                       |
| 6         | -7.733742 | 0.085854  | 0.208902                        |
| 6         | 0.623477  | 1.429173  | -0.103197                       |
| 6         | -6.439893 | -0.082584 | 0.163901                        |
| 8         | 7.347238  | 0.048359  | 0.847083                        |
| 6         | -5.184192 | -0.226126 | 0.112239                        |
| 6         | 6.313347  | -0.309718 | 0.448396                        |
| 6         | -3.888780 | -0.315974 | 0.094022                        |
| 8         | 5.267236  | -0.707255 | 0.047487                        |
| 6         | -2.624327 | -0.335729 | 0.054678                        |
| 12        | 3.265636  | -0.384056 | -0.485940                       |
| 6         | -0.446210 | 0.793544  | -0.016794                       |
| 6         | -1.303247 | -0.296943 | -0.032990                       |
| 12        | 0.615107  | -1.446083 | -0.371110                       |
| 16        |           |           |                                 |
| 82.232563 | Kcal/mol  | 3.565946  | eV -101.252635 H Child_8_33.log |
| 8         | -0.583494 | 2.555290  | -0.710899                       |
| 6         | -0.200918 | -2.354088 | -0.109063                       |
| 6         | 1.490817  | 1.874086  | 0.307004                        |
| 12        | 1.806488  | -2.159340 | -0.240386                       |
| 6         | 0.086578  | 2.020379  | 0.340239                        |
| 6         | 4.798543  | -0.292808 | -0.199836                       |
| 6         | -1.673756 | 0.632734  | 1.061944                        |
| 6         | 3.564633  | -1.060356 | -0.189021                       |
| 6         | -0.645092 | 1.367392  | 1.307677                        |
| 6         | -1.389065 | -2.044830 | 0.038016                        |
| 6         | -2.617251 | 0.025118  | 0.337160                        |
| 6         | 3.515580  | 0.305492  | 0.058850                        |
| 6         | 2.553256  | 1.261907  | 0.252599                        |
| 6         | -2.695961 | -1.424190 | 0.139372                        |
| 8         | -3.758254 | -2.038872 | -0.052082                       |
| 12        | -2.305672 | 1.659643  | -0.923430                       |
| 16        |           |           |                                 |
| 82.246741 | Kcal/mol  | 3.566561  | eV -101.252612 H MutI_15_77.log |
| 6         | 2.998011  | 1.957858  | -0.626597                       |
| 6         | 3.352151  | -1.414439 | 0.373022                        |
| 6         | 1.856276  | 2.673056  | -0.622122                       |
| 8         | 1.220535  | -1.324054 | 1.146048                        |
| 8         | -3.252315 | 1.472417  | 1.714409                        |
| 6         | -3.353812 | -0.766438 | -1.010053                       |
| 6         | 3.677054  | 0.944947  | -0.401815                       |
| 12        | -2.151009 | -2.495141 | -1.238216                       |
| 6         | -2.776413 | 1.331429  | 0.563083                        |
| 6         | -3.109826 | 0.234117  | -0.295558                       |
| 6         | -0.646324 | 2.698889  | -0.198948                       |
| 6         | 2.133693  | -2.116771 | 0.594946                        |
| 6         | -1.734713 | 2.200922  | 0.082211                        |
| 6         | 0.650348  | 2.919480  | -0.503882                       |
| 12        | 0.068352  | -2.759264 | 0.382891                        |



|           |           |           |                                 |
|-----------|-----------|-----------|---------------------------------|
| 6         | 3.827906  | -0.352057 | -0.057577                       |
| 16        |           |           |                                 |
| 82.321432 | Kcal/mol  | 3.569800  | eV -101.252493 H MutD_15_32.log |
| 6         | -4.659192 | -1.228343 | -0.080892                       |
| 6         | -3.063872 | 2.103884  | 0.131009                        |
| 6         | 0.164195  | -2.264497 | -0.020263                       |
| 6         | 0.688739  | 2.757265  | 0.016291                        |
| 8         | 2.838295  | 1.490239  | -0.337588                       |
| 6         | -1.876923 | 2.735834  | 0.179113                        |
| 6         | 5.963133  | -1.134110 | 0.521930                        |
| 6         | -0.653343 | 2.897380  | 0.130073                        |
| 6         | -4.485427 | 0.003303  | -0.010227                       |
| 8         | 4.952202  | -0.854630 | -0.002357                       |
| 6         | 1.766917  | 2.172739  | -0.147485                       |
| 12        | 2.862582  | -0.391137 | -0.136191                       |
| 12        | -3.121556 | -2.525430 | 0.007336                        |
| 6         | 1.326228  | -1.691617 | -0.075816                       |
| 6         | -1.083764 | -2.619063 | 0.008825                        |
| 6         | -3.956075 | 1.252882  | 0.058412                        |
| 16        |           |           |                                 |
| 82.365759 | Kcal/mol  | 3.571722  | eV -101.252422 H Child_4_54.log |
| 6         | 3.439662  | -0.914567 | -0.175541                       |
| 8         | -6.948999 | -0.949997 | 0.947900                        |
| 12        | 1.316885  | -0.885631 | -0.012444                       |
| 6         | -6.006296 | -0.681860 | 0.263603                        |
| 6         | 4.151200  | -1.985299 | 0.015990                        |
| 6         | -5.005638 | -0.394662 | -0.477517                       |
| 8         | 4.756862  | -3.007429 | 0.136963                        |
| 12        | 1.984399  | 2.764722  | 0.251604                        |
| 6         | 0.218003  | 0.426114  | 1.532056                        |
| 6         | -3.829054 | -0.047306 | -0.901320                       |
| 6         | -0.233799 | 0.593115  | -0.327034                       |
| 6         | 3.653366  | 0.466354  | -0.276893                       |
| 6         | -1.423082 | 0.544798  | -0.851105                       |
| 6         | 0.423911  | 1.486869  | 0.763743                        |
| 6         | -2.648288 | 0.320295  | -1.225159                       |
| 6         | 3.580296  | 1.704537  | -0.265629                       |
| 16        |           |           |                                 |
| 82.457459 | Kcal/mol  | 3.575698  | eV -101.252276 H MutD_6_68.log  |
| 6         | -1.861562 | -1.253313 | 1.232855                        |
| 6         | -1.397220 | 0.371582  | -1.636968                       |
| 6         | 0.669224  | -1.834237 | 1.026113                        |
| 6         | -0.869201 | 1.951285  | 0.737064                        |
| 6         | -0.641623 | -1.497164 | 1.162614                        |
| 6         | 1.812864  | -2.398617 | 1.001960                        |
| 6         | 2.577425  | 1.311721  | 0.213017                        |
| 12        | 2.473058  | -1.006841 | -0.492403                       |
| 6         | 1.382764  | 1.843753  | 0.528780                        |
| 6         | -0.086169 | 0.464024  | -1.096929                       |
| 12        | -3.309386 | -1.018194 | -0.131540                       |
| 8         | 0.867595  | -0.277431 | -1.488757                       |
| 6         | 3.676327  | 0.756849  | -0.122338                       |
| 6         | -2.616630 | 0.123670  | -1.689331                       |
| 8         | -1.715368 | 2.406971  | 1.386548                        |
| 6         | 0.156820  | 1.371132  | 0.027329                        |

```

16
82.683311 Kcal/mol 3.585492 eV -101.251916 H Child_3_59.log
6 3.382287 -1.647634 0.591246
6 -2.143169 0.290849 0.622806
6 4.171961 -0.688089 0.433527
8 -3.178044 -0.777054 -2.422583
6 2.185741 -2.270146 0.534796
12 -1.301666 2.117727 0.520628
12 -0.559792 -0.882415 -0.223075
6 -3.194599 -0.095872 1.283929
6 0.953850 -2.280368 0.340134
6 3.955063 0.598838 0.066081
8 -4.167930 -0.478553 1.885360
6 0.691584 0.907219 -0.783963
6 -2.195011 -0.994470 -1.861043
6 3.219177 1.488907 -0.392746
6 1.856520 1.660182 -0.519595
6 0.634145 2.234104 -0.193977
16
82.695314 Kcal/mol 3.586013 eV -101.251897 H Child_8_53.log
6 -3.658350 -0.480252 -0.983098
8 4.229060 0.375955 -0.192195
6 -2.763424 -1.311177 -1.244982
8 2.459264 2.840688 -1.100286
6 -4.280314 0.571546 -0.363525
6 2.185086 1.877937 -0.498439
6 -4.480458 1.555236 0.411081
6 3.167356 -0.099668 0.269822
12 -0.927978 -1.734683 -0.443955
6 2.964543 -1.395622 0.830818
12 -2.557002 0.935356 1.129685
6 1.905506 0.753946 0.191282
6 -0.598425 0.186763 0.927776
6 0.584800 0.463543 0.617628
6 2.098795 -2.237062 0.269190
6 0.927080 -2.575392 -0.075705
16
82.784548 Kcal/mol 3.589882 eV -101.251755 H Child_12_28.log
12 4.458528 -1.357701 0.819713
8 -4.573144 0.708256 0.372275
6 2.504394 -1.170124 0.253121
6 -3.477863 1.376428 0.510237
6 3.205997 0.039404 0.127478
12 -4.141275 -1.019850 -0.341907
6 1.203982 -1.519295 -0.037708
6 -2.279251 1.726448 0.476688
8 3.437672 1.901874 -1.341939
6 -0.995345 2.005983 0.505468
6 2.727745 1.300061 -0.478017
6 -2.519377 -2.137511 -0.551483
6 0.043127 -1.896136 -0.239087
6 0.253468 1.885125 0.217152
6 1.493390 1.750371 -0.020087
6 -1.280807 -2.085823 -0.426489
16

```

83.021311 Kcal/mol 3.600149 eV -101.251378 H Child\_8\_21.log  
 8 5.622215 0.606728 -0.121162  
 8 -5.952099 -0.043505 -0.348720  
 6 4.447176 0.538644 0.110790  
 6 -4.795885 -0.025851 -0.129094  
 6 3.219503 0.550011 0.559158  
 6 -3.461581 0.053044 -0.027823  
 6 1.983599 -0.245709 0.949415  
 6 1.839780 1.010817 0.477862  
 6 -2.737212 1.234199 -0.373574  
 12 2.285087 -1.875877 -1.659466  
 6 -2.626993 -0.990600 0.493786  
 6 0.813818 1.814518 0.034559  
 6 -1.660998 1.832886 -0.488771  
 6 -0.341012 2.065514 -0.329667  
 6 -1.619643 -1.583608 0.890920  
 12 0.404561 -1.626537 0.888940  
 16

83.249363 Kcal/mol 3.610039 eV -101.251014 H Child\_7\_17.log  
 6 -1.945906 2.899021 0.078856  
 8 11.005563 -0.393474 1.035605  
 6 -2.986190 2.251853 0.276041  
 6 0.242490 -2.182310 -0.896022  
 6 -4.018867 1.386673 0.478996  
 6 1.122459 -1.224183 -1.314919  
 6 -4.820957 0.448227 0.547700  
 6 11.095515 0.753771 1.071595  
 12 -0.052959 2.778490 -0.582056  
 6 -0.931493 -2.319689 -0.187229  
 8 -5.395537 -0.718501 0.688297  
 6 1.446404 -2.621151 -1.591568  
 6 1.282716 1.382006 -1.208919  
 6 1.294161 0.143833 -1.298598  
 6 -1.938174 -2.277417 0.537322  
 12 -3.608137 -1.357491 1.186160  
 16

83.445092 Kcal/mol 3.618526 eV -101.250702 H Child\_14\_30.log  
 6 -3.842945 -1.684696 0.085335  
 6 0.211888 2.547605 -0.060475  
 8 -2.944842 -2.681854 -0.011203  
 6 -2.346991 2.579009 -0.052402  
 6 -1.650594 -2.279031 -0.024059  
 6 1.344040 2.053975 -0.078016  
 6 -4.224284 -0.525145 0.122439  
 6 -1.118281 2.739680 -0.068747  
 12 4.205432 -1.710573 -0.028630  
 6 -3.479672 1.855082 0.017486  
 6 -0.513870 -1.805897 -0.075991  
 6 2.486551 1.336379 -0.000878  
 6 3.692351 0.979431 0.105053  
 6 -4.170839 0.828449 0.077473  
 8 4.767683 0.336601 0.187314  
 12 1.385664 -1.038345 -0.112385  
 16

83.784025 Kcal/mol 3.633224 eV -101.250162 H Child\_9\_15.log

|           |           |           |                                  |
|-----------|-----------|-----------|----------------------------------|
| 8         | 4.598677  | -1.576245 | -0.010600                        |
| 12        | -3.612390 | 1.475057  | -0.043715                        |
| 6         | 3.402395  | -1.561922 | -0.052956                        |
| 6         | -1.562415 | 1.789917  | -0.158939                        |
| 6         | 0.892878  | -1.945850 | -0.052784                        |
| 6         | -0.383226 | 1.611697  | -0.897764                        |
| 6         | 2.130190  | -1.339831 | -0.098986                        |
| 6         | -4.851277 | -0.141938 | 0.157762                         |
| 6         | -0.318414 | -2.188693 | -0.002993                        |
| 6         | -3.973823 | -1.044302 | 0.144860                         |
| 6         | -1.663325 | -2.141979 | 0.060617                         |
| 6         | -0.453867 | 1.404550  | 0.615586                         |
| 8         | 3.042143  | 1.940075  | 0.135716                         |
| 6         | 3.932833  | 2.639407  | 0.374781                         |
| 6         | -2.850852 | -1.810397 | 0.113451                         |
| 12        | 1.367961  | 0.647059  | -0.141012                        |
| 16        |           |           |                                  |
| 83.866570 | Kcal/mol  | 3.636803  | eV -101.250031 H Child_7_39.log  |
| 8         | -5.138400 | -0.489049 | 0.354994                         |
| 8         | 4.207780  | 1.810208  | -0.203398                        |
| 6         | -3.978586 | -0.454789 | 0.192839                         |
| 6         | 5.180124  | 1.662698  | -0.823007                        |
| 6         | -1.896301 | -1.565106 | -0.353364                        |
| 6         | -0.894335 | -2.258761 | -0.526111                        |
| 6         | 3.495873  | -1.204055 | 0.523869                         |
| 6         | -2.639835 | -0.408712 | -0.006320                        |
| 6         | -0.697566 | 1.011626  | 0.442899                         |
| 6         | 0.368911  | -2.737551 | -0.515448                        |
| 12        | -2.742967 | 2.876833  | -0.599655                        |
| 6         | 1.591242  | -2.707394 | -0.342598                        |
| 6         | 0.535984  | 1.156601  | 0.644916                         |
| 6         | -2.069817 | 0.889663  | 0.302220                         |
| 6         | 2.741554  | -2.088453 | 0.056773                         |
| 12        | 2.494756  | 0.594511  | 0.700257                         |
| 16        |           |           |                                  |
| 83.870453 | Kcal/mol  | 3.636972  | eV -101.250024 H MutD_6_78.log   |
| 8         | -6.679967 | 0.081007  | -0.670126                        |
| 6         | -1.914940 | -0.966062 | -0.297787                        |
| 6         | 1.390105  | 1.941854  | 0.804374                         |
| 6         | 1.250407  | -1.817711 | 1.078802                         |
| 6         | -5.491885 | 0.038248  | -0.522534                        |
| 6         | 2.144458  | -1.621006 | 1.951332                         |
| 6         | -0.822274 | -1.522808 | -0.313000                        |
| 6         | -4.232030 | -0.114677 | -0.385780                        |
| 6         | -2.923926 | 0.061135  | -0.176178                        |
| 6         | 0.156973  | 2.092787  | 0.691475                         |
| 6         | -1.154909 | 1.824775  | 0.464547                         |
| 6         | -2.205380 | 1.236237  | 0.196671                         |
| 6         | 0.577552  | -1.458181 | -0.113116                        |
| 12        | 2.466926  | 0.190567  | 0.591844                         |
| 8         | 1.302972  | -0.746791 | -0.922425                        |
| 12        | 7.730663  | 0.405994  | -1.219547                        |
| 16        |           |           |                                  |
| 84.019782 | Kcal/mol  | 3.643447  | eV -101.249786 H Child_12_31.log |
| 6         | 3.742924  | -1.163314 | -0.093185                        |

|                                                             |           |           |           |
|-------------------------------------------------------------|-----------|-----------|-----------|
| 8                                                           | -4.278578 | -0.468650 | -0.203515 |
| 6                                                           | 4.123313  | 0.074769  | -0.380187 |
| 12                                                          | -4.110114 | 1.526010  | -0.063403 |
| 6                                                           | 3.799178  | 1.263361  | -0.123699 |
| 6                                                           | -2.969540 | -0.568690 | -0.069828 |
| 8                                                           | 3.032252  | 2.268324  | -0.003810 |
| 6                                                           | -2.164122 | -1.723771 | -0.084251 |
| 6                                                           | -2.144935 | 0.588895  | 0.090684  |
| 12                                                          | 1.127971  | 1.735920  | 0.147358  |
| 6                                                           | -0.983636 | -2.093206 | 0.002842  |
| 6                                                           | 2.772859  | -2.010592 | -0.075742 |
| 6                                                           | -0.784262 | 0.707408  | 0.186727  |
| 6                                                           | 1.551872  | -2.237911 | 0.269707  |
| 6                                                           | 0.328783  | -1.615520 | 0.146057  |
| 6                                                           | 0.353621  | -0.144855 | 0.239400  |
| 16                                                          |           |           |           |
| 84.256057 Kcal/mol 3.653693 eV -101.249410 H Child_1_8.log  |           |           |           |
| 8                                                           | 6.167829  | -0.016447 | -0.844757 |
| 6                                                           | -1.021340 | 2.967003  | -0.485838 |
| 6                                                           | 5.073189  | -0.015212 | -0.380388 |
| 6                                                           | -2.094534 | 2.322913  | -0.468564 |
| 8                                                           | -0.925712 | -3.331416 | -1.368166 |
| 12                                                          | 0.556103  | 2.013724  | 0.331068  |
| 6                                                           | -1.644795 | -2.722850 | -0.715796 |
| 6                                                           | -3.184227 | 1.478611  | -0.469715 |
| 6                                                           | 3.934305  | -0.009658 | 0.193627  |
| 6                                                           | -0.573669 | -1.490107 | 1.446304  |
| 12                                                          | -2.521799 | -1.315948 | 0.867276  |
| 6                                                           | -4.484474 | 0.996253  | -0.904099 |
| 6                                                           | 2.687022  | -0.012166 | 0.503530  |
| 6                                                           | 0.428036  | -0.824027 | 1.112433  |
| 6                                                           | -3.592085 | 0.229411  | -0.041156 |
| 6                                                           | 1.414474  | 0.148094  | 0.763540  |
| 16                                                          |           |           |           |
| 84.675441 Kcal/mol 3.671879 eV -101.248742 H MutD_10_78.log |           |           |           |
| 6                                                           | -2.667482 | 0.022002  | 0.073922  |
| 12                                                          | 1.376219  | -1.674033 | 0.276024  |
| 6                                                           | -6.425469 | -0.699750 | -0.139444 |
| 6                                                           | -1.419983 | 0.443047  | 0.103796  |
| 12                                                          | -0.445486 | 2.476947  | -0.023090 |
| 8                                                           | -7.602631 | -0.920710 | -0.213973 |
| 6                                                           | 0.959427  | 0.688447  | 0.127613  |
| 6                                                           | -5.176371 | -0.479970 | -0.057544 |
| 6                                                           | 1.782493  | 2.005073  | -0.004082 |
| 6                                                           | 4.563750  | -0.411568 | -0.055031 |
| 6                                                           | 5.800946  | -0.710268 | -0.184091 |
| 8                                                           | 6.981015  | -0.894396 | -0.313985 |
| 6                                                           | 2.349563  | 0.721450  | 0.070958  |
| 6                                                           | -0.133321 | -0.142000 | 0.184265  |
| 6                                                           | 3.246310  | -0.400987 | 0.068414  |
| 6                                                           | -3.912509 | -0.221160 | 0.009298  |
| 16                                                          |           |           |           |
| 85.129931 Kcal/mol 3.691588 eV -101.248017 H Child_8_45.log |           |           |           |
| 6                                                           | 2.655322  | 0.032717  | -0.222172 |
| 8                                                           | -5.266759 | -0.409844 | 0.424679  |

|                                                             |           |           |           |
|-------------------------------------------------------------|-----------|-----------|-----------|
| 6                                                           | 1.673991  | -0.957198 | -0.303341 |
| 6                                                           | -4.107807 | -0.470794 | 0.206841  |
| 6                                                           | 2.481043  | 1.396129  | -0.123741 |
| 6                                                           | -2.797794 | -0.559474 | -0.022848 |
| 8                                                           | 2.046822  | -2.262648 | -0.119853 |
| 6                                                           | -1.866719 | 0.568525  | -0.074981 |
| 6                                                           | 0.250061  | -0.740109 | -0.396564 |
| 6                                                           | -2.011057 | -1.762524 | -0.242426 |
| 6                                                           | 2.291938  | 2.635633  | 0.012646  |
| 6                                                           | -1.187377 | 1.752420  | -0.000040 |
| 6                                                           | -0.482528 | 0.424958  | -0.261796 |
| 6                                                           | -0.776494 | -1.764506 | -0.353255 |
| 12                                                          | 0.362864  | 3.091043  | 0.085945  |
| 12                                                          | 3.722472  | -1.587270 | 0.601676  |
| 16                                                          |           |           |           |
| 85.151403 Kcal/mol 3.692519 eV -101.247983 H MutD_11_68.log |           |           |           |
| 6                                                           | -2.182772 | -2.812130 | -0.274353 |
| 6                                                           | -7.869567 | 7.317097  | 0.076643  |
| 6                                                           | 3.439855  | 0.203475  | -0.638920 |
| 6                                                           | 0.059612  | -1.593986 | -0.448547 |
| 6                                                           | -3.333991 | -3.446869 | -0.173765 |
| 6                                                           | -1.078881 | -2.214850 | -0.368636 |
| 8                                                           | -7.007227 | 8.032782  | 0.330449  |
| 6                                                           | 1.174426  | -0.993769 | -0.511553 |
| 8                                                           | 7.950119  | 2.425806  | -0.710732 |
| 6                                                           | 2.310963  | -0.388188 | -0.572567 |
| 12                                                          | -6.438701 | -4.006925 | -0.438404 |
| 6                                                           | 5.724737  | 1.358729  | -0.699352 |
| 6                                                           | 6.877277  | 1.908407  | -0.703184 |
| 6                                                           | -4.366556 | -4.165826 | -0.007974 |
| 12                                                          | 3.141891  | -0.944596 | 3.190509  |
| 6                                                           | 4.581326  | 0.786168  | -0.674957 |
| 16                                                          |           |           |           |
| 85.316085 Kcal/mol 3.699660 eV -101.247721 H Child_5_21.log |           |           |           |
| 8                                                           | -0.669179 | -2.617406 | -0.310484 |
| 8                                                           | -6.544146 | 1.604505  | -0.863515 |
| 6                                                           | 1.231244  | -1.640562 | -1.451032 |
| 6                                                           | -5.902207 | 0.730507  | -0.488616 |
| 6                                                           | 0.049599  | -1.594208 | -0.687337 |
| 6                                                           | 1.349388  | 1.600835  | 2.236027  |
| 6                                                           | 2.341326  | -1.089410 | -1.465351 |
| 6                                                           | 0.494888  | 0.684748  | 2.057965  |
| 12                                                          | -1.138903 | -2.161659 | 1.516250  |
| 12                                                          | 2.283624  | 2.007952  | 0.304728  |
| 6                                                           | -0.138740 | -0.266633 | -0.045575 |
| 6                                                           | -0.171982 | -0.322897 | 1.373428  |
| 6                                                           | 3.328138  | -0.224457 | -1.154957 |
| 6                                                           | 0.658163  | 2.044325  | -1.109788 |
| 6                                                           | 3.835288  | 0.810112  | -0.634823 |
| 6                                                           | 0.253221  | 0.925587  | -0.706568 |
| 16                                                          |           |           |           |
| 85.704555 Kcal/mol 3.716506 eV -101.247102 H Child_3_26.log |           |           |           |
| 6                                                           | -1.004811 | -3.027369 | 0.629871  |
| 8                                                           | -2.502264 | 3.222755  | -0.784695 |
| 12                                                          | 0.825764  | -2.480797 | -0.340931 |

|                                                              |           |           |           |
|--------------------------------------------------------------|-----------|-----------|-----------|
| 6                                                            | -2.355316 | 2.091187  | -0.476721 |
| 6                                                            | -1.855081 | -2.031624 | 0.331935  |
| 6                                                            | -2.211842 | 0.820719  | -0.084704 |
| 6                                                            | 2.558554  | -1.617430 | -0.937980 |
| 6                                                            | 3.866751  | 1.683307  | 0.387750  |
| 6                                                            | -0.728777 | -1.089488 | 0.421407  |
| 6                                                            | -3.246887 | -0.140791 | -0.143899 |
| 8                                                            | 0.115640  | 1.190787  | 0.487320  |
| 6                                                            | 3.666308  | 0.654086  | -0.320138 |
| 6                                                            | 3.120927  | -0.517163 | -0.808085 |
| 12                                                           | 1.832439  | 1.686518  | 0.802129  |
| 6                                                            | -3.083166 | -1.369504 | 0.128944  |
| 6                                                            | -0.860903 | 0.247905  | 0.345725  |
| 16                                                           |           |           |           |
| 85.911751 Kcal/mol 3.725491 eV -101.246771 H Child_10_62.log |           |           |           |
| 8                                                            | 7.993769  | 2.008096  | -0.723189 |
| 12                                                           | -7.148192 | -2.293967 | -0.574404 |
| 6                                                            | 6.940668  | 1.448289  | -0.713099 |
| 6                                                            | -1.407698 | -1.791246 | -0.454685 |
| 6                                                            | 5.811579  | 0.849977  | -0.702806 |
| 6                                                            | -2.634322 | -2.040866 | -0.332903 |
| 8                                                            | -5.816564 | 6.426240  | 0.829687  |
| 6                                                            | -0.153360 | -1.449720 | -0.530403 |
| 6                                                            | 4.648498  | 0.314966  | -0.746147 |
| 6                                                            | -3.931705 | -2.262389 | -0.184814 |
| 6                                                            | 3.463376  | -0.180350 | -0.689456 |
| 6                                                            | 1.055976  | -1.071214 | -0.606205 |
| 6                                                            | -6.371668 | 5.749046  | 0.086140  |
| 6                                                            | -5.141232 | -2.465066 | 0.138601  |
| 12                                                           | 3.419741  | -1.557756 | 3.202555  |
| 6                                                            | 2.273851  | -0.643762 | -0.662521 |
| 16                                                           |           |           |           |
| 86.295658 Kcal/mol 3.742139 eV -101.246160 H MutD_12_68.log  |           |           |           |
| 6                                                            | -0.139500 | 2.806543  | -0.109106 |
| 6                                                            | 1.205825  | 2.641899  | -0.137118 |
| 6                                                            | -1.345648 | -2.602754 | -0.041645 |
| 6                                                            | -3.785142 | 1.797396  | 0.068197  |
| 6                                                            | 2.401856  | 2.309065  | -0.133346 |
| 6                                                            | -3.862083 | -1.996883 | 0.088427  |
| 8                                                            | 4.351863  | -0.848186 | 0.809071  |
| 6                                                            | -0.117844 | -2.532665 | -0.088021 |
| 6                                                            | 1.195807  | -2.249604 | -0.179115 |
| 6                                                            | 2.305479  | -1.740156 | -0.277313 |
| 6                                                            | -2.666011 | 2.337209  | 0.017148  |
| 6                                                            | -2.683680 | -2.399558 | 0.041584  |
| 12                                                           | -4.525827 | -0.081182 | 0.116615  |
| 6                                                            | -1.364641 | 2.712602  | -0.047906 |
| 8                                                            | 3.416004  | -1.125139 | -0.521315 |
| 12                                                           | 3.775039  | 0.855186  | 0.090656  |
| 16                                                           |           |           |           |
| 86.589656 Kcal/mol 3.754888 eV -101.245691 H Child_8_30.log  |           |           |           |
| 6                                                            | 0.170939  | 3.724116  | 0.153721  |
| 8                                                            | 0.804343  | -3.512348 | 0.153676  |
| 6                                                            | 1.349097  | 3.351107  | -0.025687 |
| 12                                                           | -0.864017 | -2.649750 | 0.147181  |

|    |                                                             |           |           |
|----|-------------------------------------------------------------|-----------|-----------|
| 12 | -1.445470                                                   | 2.556358  | 0.409382  |
| 6  | 1.921565                                                    | -2.873805 | 0.051559  |
| 6  | 2.497280                                                    | 2.647325  | -0.187879 |
| 6  | 2.838780                                                    | -2.067976 | -0.084931 |
| 6  | 3.218024                                                    | 1.647691  | -0.268528 |
| 6  | -2.308144                                                   | -1.140083 | 0.189186  |
| 6  | -2.457280                                                   | 0.691323  | 0.469679  |
| 6  | 3.445831                                                    | -0.866837 | -0.203707 |
| 8  | -3.898718                                                   | -0.056645 | -1.500032 |
| 6  | 3.602703                                                    | 0.356493  | -0.277426 |
| 6  | -3.082995                                                   | -0.144596 | -0.591759 |
| 6  | -2.450994                                                   | -0.379316 | 1.457787  |
| 16 | 86.830389 Kcal/mol 3.765327 eV -101.245307 H Child_4_28.log |           |           |
| 8  | -4.819522                                                   | -2.566218 | 0.145028  |
| 6  | 6.255846                                                    | -0.823182 | 0.474874  |
| 6  | -4.081006                                                   | -1.624160 | 0.017342  |
| 6  | 5.003716                                                    | -0.638539 | 0.229930  |
| 6  | -3.241516                                                   | -0.680673 | -0.117464 |
| 8  | 1.490191                                                    | 1.634268  | -0.319700 |
| 6  | -2.451794                                                   | 0.398961  | -0.119115 |
| 6  | 3.736299                                                    | -0.526906 | -0.055672 |
| 6  | -2.633131                                                   | 1.716450  | 0.441747  |
| 6  | 1.368658                                                    | 0.329601  | -0.332369 |
| 6  | -1.059376                                                   | 0.457353  | -0.599609 |
| 6  | 2.457276                                                    | -0.570058 | -0.210153 |
| 6  | -2.154213                                                   | 2.824205  | 0.808575  |
| 6  | 0.013937                                                    | -0.273113 | -0.312787 |
| 12 | -0.280098                                                   | 2.482744  | -0.123933 |
| 12 | 0.892304                                                    | -2.156413 | 0.127732  |
| 16 | 86.845052 Kcal/mol 3.765963 eV -101.245284 H Child_8_60.log |           |           |
| 6  | 1.626769                                                    | 2.122908  | -0.503970 |
| 6  | 4.273406                                                    | 0.183604  | 1.584919  |
| 6  | -2.044759                                                   | 1.047187  | -0.361955 |
| 6  | 3.516473                                                    | -0.663892 | 1.002906  |
| 6  | 0.417491                                                    | 1.852030  | -0.489351 |
| 8  | -1.086602                                                   | -2.149188 | 0.156751  |
| 8  | -5.339537                                                   | 1.047634  | 1.068802  |
| 6  | 2.670859                                                    | -1.212355 | -0.048133 |
| 6  | -4.347165                                                   | 0.795341  | 0.466018  |
| 6  | 3.601044                                                    | -0.660466 | -0.849035 |
| 6  | -0.893469                                                   | 1.475103  | -0.456416 |
| 6  | 0.161705                                                    | -1.849740 | 0.053793  |
| 6  | -3.284113                                                   | 0.417476  | -0.196132 |
| 6  | 1.365745                                                    | -1.663519 | -0.063707 |
| 12 | -2.745053                                                   | -1.558296 | -0.661573 |
| 12 | 3.497152                                                    | 1.370827  | -0.224930 |
| 16 | 87.037128 Kcal/mol 3.774292 eV -101.244978 H Child_5_10.log |           |           |
| 6  | 6.198506                                                    | -0.407881 | 0.636291  |
| 12 | -3.922665                                                   | 2.155376  | 0.221386  |
| 6  | 4.968966                                                    | -0.233761 | 0.295199  |
| 8  | -1.951160                                                   | 1.774469  | -0.041091 |
| 6  | 3.652042                                                    | -0.067274 | 0.036107  |



|           |           |           |           |                              |
|-----------|-----------|-----------|-----------|------------------------------|
| 6         | -0.680639 | 2.062878  | 0.043543  |                              |
| 8         | -3.291522 | -3.451123 | 0.821639  |                              |
| 12        | -2.521436 | -0.202366 | -0.453204 |                              |
| 6         | -3.242150 | -2.322396 | 0.640879  |                              |
| 6         | 0.543007  | 2.143096  | 0.107322  |                              |
| 6         | 2.726452  | -1.100475 | -0.313285 |                              |
| 6         | 1.850959  | 1.791359  | 0.132656  |                              |
| 6         | -0.929158 | -1.438067 | -0.929496 |                              |
| 6         | 0.268134  | -1.676895 | -0.769744 |                              |
| 6         | 2.904810  | 1.153615  | 0.113970  |                              |
| 6         | 1.617514  | -1.574683 | -0.570535 |                              |
| 16        |           |           |           |                              |
| 87.084331 | Kcal/mol  | 3.776339  | eV        | -101.244903 H MutD_2_66.log  |
| 12        | -0.606984 | 0.388059  | -1.536474 |                              |
| 6         | -2.485734 | 1.770179  | 1.013331  |                              |
| 6         | -0.019645 | 1.958063  | 0.414916  |                              |
| 6         | 0.958169  | 1.310624  | -0.315687 |                              |
| 6         | 6.911812  | -1.103837 | 0.231657  |                              |
| 6         | 3.378711  | 0.471889  | 0.020385  |                              |
| 8         | -4.888891 | -2.904752 | 1.007726  |                              |
| 8         | -4.384480 | 0.332660  | 0.272419  |                              |
| 12        | -3.312342 | -0.579138 | -1.171854 |                              |
| 6         | -4.364195 | -2.405202 | 0.123305  |                              |
| 6         | 2.226411  | 0.978991  | -0.108230 |                              |
| 6         | 5.695763  | -0.602170 | 0.241904  |                              |
| 6         | -3.527153 | 1.138004  | 0.790363  |                              |
| 6         | 8.065671  | -1.679864 | 0.269918  |                              |
| 6         | -1.182074 | 2.059860  | 0.867390  |                              |
| 6         | 4.545409  | -0.084926 | 0.160546  |                              |
| 16        |           |           |           |                              |
| 87.225608 | Kcal/mol  | 3.782465  | eV        | -101.244678 H MutD_16_32.log |
| 6         | 3.621446  | 0.093581  | 2.539192  |                              |
| 6         | -3.060230 | 2.255664  | 0.025822  |                              |
| 6         | 2.178144  | -0.159193 | -1.124892 |                              |
| 12        | -4.383852 | -0.402617 | 0.597008  |                              |
| 6         | -0.591991 | 2.510506  | -0.611182 |                              |
| 6         | 0.400453  | -1.973094 | -0.522636 |                              |
| 6         | 0.597771  | 1.917218  | -0.861804 |                              |
| 8         | -0.601697 | -2.664895 | -0.143432 |                              |
| 6         | 4.785929  | -0.400936 | -1.495230 |                              |
| 6         | -4.096556 | 1.601976  | 0.293839  |                              |
| 6         | -1.787755 | 2.600084  | -0.320764 |                              |
| 8         | 4.482521  | 0.840510  | 2.678452  |                              |
| 12        | -2.380937 | -2.396578 | 0.399460  |                              |
| 6         | 3.516418  | -0.253409 | -1.364152 |                              |
| 6         | 1.474831  | 1.079996  | -1.040210 |                              |
| 6         | 1.316686  | -1.241489 | -0.890946 |                              |
| 16        |           |           |           |                              |
| 87.418498 | Kcal/mol  | 3.790830  | eV        | -101.244370 H Child_2_24.log |
| 6         | 2.601019  | 0.424825  | -0.276394 |                              |
| 8         | -4.085118 | -1.558799 | -0.210890 |                              |
| 6         | 5.810682  | -1.631548 | 0.755623  |                              |
| 6         | -3.375462 | 1.772485  | 0.588074  |                              |
| 6         | 4.666696  | -1.152181 | 0.429805  |                              |
| 12        | -4.557068 | 0.194197  | 0.343440  |                              |

|                                                             |           |           |           |
|-------------------------------------------------------------|-----------|-----------|-----------|
| 8                                                           | 2.709091  | 2.808951  | -0.362101 |
| 6                                                           | -2.845362 | -1.850891 | -0.286920 |
| 6                                                           | 2.076320  | -0.834109 | -0.175218 |
| 6                                                           | -2.143386 | 1.859392  | 0.380044  |
| 6                                                           | 3.491471  | -0.638307 | 0.053118  |
| 6                                                           | -1.625450 | -2.025565 | -0.310250 |
| 6                                                           | 2.018519  | 1.775959  | -0.341399 |
| 6                                                           | -0.299001 | -1.845610 | -0.255358 |
| 6                                                           | 0.883100  | -1.499542 | -0.186065 |
| 12                                                          | -0.155153 | 1.794916  | -0.148976 |
| 16                                                          |           |           |           |
| 87.439313 Kcal/mol 3.791732 eV -101.244337 H Child_9_22.log |           |           |           |
| 8                                                           | -5.619643 | -1.985013 | 0.397431  |
| 8                                                           | 7.098092  | -1.524571 | 0.327076  |
| 6                                                           | -4.515937 | -1.589761 | 0.308217  |
| 6                                                           | 2.512541  | 2.001560  | -0.239357 |
| 6                                                           | -3.292026 | -1.054788 | 0.186060  |
| 6                                                           | 6.514737  | -1.418975 | 1.312361  |
| 6                                                           | -2.105498 | -1.800292 | -0.094640 |
| 6                                                           | 2.566883  | 0.685042  | -0.522310 |
| 6                                                           | -0.969069 | -2.199930 | -0.365641 |
| 6                                                           | 2.586040  | -0.565711 | -0.743854 |
| 6                                                           | -3.177457 | 0.369612  | 0.273850  |
| 6                                                           | 1.457071  | 2.801037  | -0.056834 |
| 12                                                          | 0.992237  | -1.861594 | -0.741058 |
| 6                                                           | 0.441852  | 3.548602  | 0.089194  |
| 6                                                           | -2.891919 | 1.572701  | 0.294474  |
| 12                                                          | -1.541479 | 3.026768  | 0.037294  |
| 16                                                          |           |           |           |
| 87.460419 Kcal/mol 3.792648 eV -101.244303 H Child_3_48.log |           |           |           |
| 12                                                          | -2.557196 | 0.560063  | -1.459858 |
| 6                                                           | 5.722148  | 1.425334  | 0.038748  |
| 6                                                           | -3.104045 | -1.181123 | -0.095654 |
| 6                                                           | 4.484531  | 1.018217  | 0.027796  |
| 6                                                           | -3.580033 | -0.195683 | 0.592839  |
| 6                                                           | 3.272688  | 0.604448  | 0.016377  |
| 12                                                          | -1.281891 | -2.024708 | 0.193352  |
| 6                                                           | 2.004600  | 0.182035  | 0.025058  |
| 6                                                           | -1.532822 | 1.902646  | -0.012358 |
| 8                                                           | 2.701777  | -2.110933 | -0.001664 |
| 6                                                           | -3.724498 | 1.086803  | 1.029751  |
| 6                                                           | 0.929814  | 1.090651  | 0.033082  |
| 6                                                           | -2.606109 | 1.735183  | 0.717258  |
| 6                                                           | 1.759903  | -1.313855 | 0.023044  |
| 8                                                           | 0.480505  | -1.660148 | 0.057628  |
| 6                                                           | -0.191045 | 1.602743  | 0.062456  |
| 16                                                          |           |           |           |
| 87.664038 Kcal/mol 3.801477 eV -101.243979 H Child_1_28.log |           |           |           |
| 8                                                           | 5.628071  | -1.688635 | 0.797077  |
| 6                                                           | -0.750438 | 1.267093  | 0.031017  |
| 6                                                           | 4.739246  | -1.248044 | 0.199813  |
| 6                                                           | -2.192619 | 1.242186  | 0.117395  |
| 8                                                           | 3.774382  | -0.842749 | -0.385727 |
| 6                                                           | 1.323781  | 2.509262  | 0.011175  |
| 12                                                          | 2.031446  | 0.382530  | -0.360751 |

|                                                             |           |           |           |
|-------------------------------------------------------------|-----------|-----------|-----------|
| 6                                                           | -0.045021 | 2.539565  | 0.056409  |
| 6                                                           | -5.271260 | -0.838710 | 0.460517  |
| 6                                                           | -3.368253 | 0.950753  | 0.229633  |
| 6                                                           | 2.614150  | 2.454389  | -0.076369 |
| 12                                                          | -3.358006 | -1.616911 | -0.044705 |
| 6                                                           | -1.526339 | -2.105396 | -0.660369 |
| 6                                                           | -4.509919 | 0.200455  | 0.305787  |
| 6                                                           | -0.805335 | -1.168140 | -0.253191 |
| 6                                                           | -0.091477 | 0.040528  | -0.159372 |
| 16                                                          |           |           |           |
| 88.063536 Kcal/mol 3.818801 eV -101.243342 H MutD_6_66.log  |           |           |           |
| 6                                                           | 2.279077  | 1.345365  | 0.216096  |
| 12                                                          | -0.603533 | -0.800063 | 0.035769  |
| 6                                                           | 3.579189  | -1.001300 | -0.020637 |
| 6                                                           | 1.488492  | -1.052840 | 0.101620  |
| 12                                                          | 0.183439  | 3.506829  | -0.027326 |
| 8                                                           | 4.778832  | -0.976770 | -0.209955 |
| 6                                                           | -4.686415 | -1.305991 | 0.025917  |
| 8                                                           | -5.642314 | -2.035596 | 0.103062  |
| 6                                                           | -3.752644 | -0.434928 | -0.055526 |
| 6                                                           | -2.189262 | 1.475818  | -0.166731 |
| 6                                                           | -2.533762 | 0.110093  | -0.088999 |
| 6                                                           | 2.510133  | -2.146370 | -0.008296 |
| 6                                                           | 2.448512  | -0.041415 | 0.149028  |
| 6                                                           | 1.924789  | 2.536725  | 0.225012  |
| 6                                                           | -1.605266 | 2.579432  | -0.188358 |
| 6                                                           | 2.528653  | -3.461631 | -0.063486 |
| 16                                                          |           |           |           |
| 88.096898 Kcal/mol 3.820248 eV -101.243289 H MutD_14_70.log |           |           |           |
| 12                                                          | -1.545854 | -1.765037 | -0.087304 |
| 6                                                           | 2.762024  | -1.303953 | -0.006472 |
| 6                                                           | 3.664224  | -2.285321 | 0.147077  |
| 6                                                           | -2.906549 | 0.975864  | 0.248531  |
| 12                                                          | 2.584273  | 2.147646  | -0.185861 |
| 6                                                           | -1.182714 | 2.895130  | 0.195242  |
| 6                                                           | 1.424708  | -0.865351 | -0.088397 |
| 6                                                           | -4.176815 | -1.323875 | -0.065766 |
| 6                                                           | -3.389420 | -0.173298 | 0.244232  |
| 6                                                           | 2.406902  | 0.106088  | -0.083884 |
| 8                                                           | 0.163316  | -1.152563 | -0.132990 |
| 6                                                           | -2.114236 | 2.075084  | 0.269526  |
| 6                                                           | 0.055073  | 3.412509  | 0.063748  |
| 6                                                           | 4.477693  | -3.245283 | 0.363976  |
| 6                                                           | 1.242004  | 3.700235  | -0.205777 |
| 8                                                           | -3.418115 | -2.397221 | -0.268788 |
| 16                                                          |           |           |           |
| 88.312019 Kcal/mol 3.829576 eV -101.242946 H Child_5_46.log |           |           |           |
| 12                                                          | -7.811700 | -0.187004 | -1.072569 |
| 8                                                           | 6.498562  | 0.437944  | -0.988800 |
| 6                                                           | -2.395584 | 1.640254  | 1.711009  |
| 6                                                           | 5.462093  | 0.154001  | -0.443189 |
| 6                                                           | -1.477868 | -2.036363 | 0.520340  |
| 6                                                           | 2.017852  | 0.802878  | 0.101220  |
| 6                                                           | -0.241352 | -2.267576 | 0.488979  |
| 6                                                           | 0.981647  | 1.462832  | 0.086306  |

|                                                                 |           |           |           |
|-----------------------------------------------------------------|-----------|-----------|-----------|
| 6                                                               | -1.345881 | 1.835187  | 1.026010  |
| 6                                                               | 4.267985  | -0.167939 | -0.135991 |
| 6                                                               | 1.091396  | -2.057357 | 0.392209  |
| 6                                                               | -0.435898 | 1.500225  | -0.010932 |
| 6                                                               | 2.183516  | -1.475892 | 0.272931  |
| 6                                                               | 2.955969  | -0.290876 | 0.085835  |
| 12                                                              | -2.404669 | -0.208988 | 0.351243  |
| 8                                                               | -0.971916 | 0.831513  | -1.000257 |
| 16                                                              |           |           |           |
| 88.346630 Kcal/mol 3.831077 eV -101.242891 H Original3D_8_3.log |           |           |           |
| 8                                                               | -2.227322 | -1.067158 | -1.006753 |
| 12                                                              | -1.327585 | -2.681685 | -0.817108 |
| 6                                                               | 2.239401  | -1.703628 | 0.491985  |
| 6                                                               | 1.492967  | -2.864107 | 0.546674  |
| 6                                                               | 2.826240  | -0.614261 | 0.391654  |
| 6                                                               | 0.727268  | 2.789440  | -0.058614 |
| 6                                                               | 0.322178  | -3.448029 | 0.138407  |
| 6                                                               | -1.215799 | 1.130147  | -0.356281 |
| 6                                                               | 2.003097  | 3.257647  | -0.119729 |
| 6                                                               | 1.221687  | -4.233362 | 0.966060  |
| 8                                                               | -4.922403 | 2.257280  | 0.826028  |
| 6                                                               | -0.262950 | 2.062909  | -0.142686 |
| 6                                                               | -1.773388 | 0.090347  | -0.675656 |
| 6                                                               | 3.246829  | 3.453288  | -0.250821 |
| 6                                                               | -5.176290 | 1.143656  | 0.905383  |
| 12                                                              | 3.268449  | 1.356246  | 0.019404  |
| 16                                                              |           |           |           |
| 88.461977 Kcal/mol 3.836079 eV -101.242707 H MutI_5_71.log      |           |           |           |
| 6                                                               | 2.029082  | -2.909671 | 0.450109  |
| 6                                                               | 4.825552  | 1.312445  | -0.448767 |
| 6                                                               | -4.857031 | -0.059288 | -0.545375 |
| 12                                                              | 0.009412  | -2.638951 | 0.386481  |
| 6                                                               | -2.424575 | -0.704485 | -0.107580 |
| 6                                                               | 3.669970  | 0.689937  | -0.243127 |
| 8                                                               | -2.237282 | 2.972102  | 1.202937  |
| 6                                                               | 2.605990  | -1.821301 | 0.253821  |
| 6                                                               | -1.167207 | -0.979714 | 0.042259  |
| 6                                                               | 5.929061  | 1.922847  | -0.658256 |
| 6                                                               | -3.665237 | -0.358150 | -0.260789 |
| 12                                                              | 0.141360  | 0.673611  | -0.133636 |
| 6                                                               | 2.936476  | -0.493383 | 0.036017  |
| 8                                                               | -5.984973 | 0.252913  | -0.808336 |
| 6                                                               | 2.231062  | 0.685584  | -0.194055 |
| 6                                                               | -1.451680 | 2.345837  | 0.643916  |
| 16                                                              |           |           |           |
| 88.612892 Kcal/mol 3.842624 eV -101.242467 H Child_18_18.log    |           |           |           |
| 8                                                               | 4.188921  | -2.014082 | 0.947494  |
| 6                                                               | -1.774384 | 1.944446  | 1.195804  |
| 6                                                               | 3.368432  | -1.305077 | 0.520509  |
| 6                                                               | -1.235833 | 3.047039  | 0.964792  |
| 6                                                               | 2.605839  | 0.894677  | -0.219156 |
| 6                                                               | -2.801039 | -0.384551 | 0.747899  |
| 6                                                               | 2.394234  | -0.514001 | -0.018714 |
| 6                                                               | -2.268365 | 0.682603  | 1.107268  |
| 6                                                               | 2.181568  | 2.024882  | -0.530235 |

|                                                                  |           |           |           |
|------------------------------------------------------------------|-----------|-----------|-----------|
| 6                                                                | -2.832536 | -1.615634 | 0.035303  |
| 6                                                                | 1.140243  | -1.106289 | -0.397593 |
| 6                                                                | 0.297827  | -0.201651 | -1.005516 |
| 8                                                                | -3.811814 | -2.085502 | -0.563520 |
| 6                                                                | -0.380974 | 0.779083  | -1.457386 |
| 12                                                               | -0.773264 | -2.133687 | -0.176921 |
| 12                                                               | 0.174353  | 2.743978  | -0.550550 |
| 16                                                               |           |           |           |
| 88.630566 Kcal/mol 3.843390 eV -101.242439 H Original2D_0_31.log |           |           |           |
| 6                                                                | 2.979364  | 2.054551  | -0.000000 |
| 6                                                                | 0.394545  | 2.178040  | -0.000000 |
| 6                                                                | -1.309639 | -1.230763 | 0.000000  |
| 6                                                                | 1.635426  | 2.363402  | -0.000000 |
| 12                                                               | 1.642185  | -0.203825 | -0.000000 |
| 6                                                                | 0.000000  | -1.653096 | -0.000000 |
| 6                                                                | 4.425646  | 1.917207  | -0.000000 |
| 12                                                               | -1.645542 | 1.988584  | 0.000000  |
| 6                                                                | 1.785265  | -3.517989 | -0.000000 |
| 6                                                                | 3.527808  | 0.767888  | -0.000000 |
| 8                                                                | -3.390237 | 1.358969  | 0.000000  |
| 6                                                                | -3.675249 | 0.038585  | 0.000000  |
| 6                                                                | 0.791905  | -2.668209 | -0.000000 |
| 6                                                                | -2.426023 | -0.716969 | 0.000000  |
| 8                                                                | -4.799309 | -0.448882 | 0.000000  |
| 6                                                                | 2.797060  | -4.315613 | -0.000000 |
| 16                                                               |           |           |           |
| 88.637831 Kcal/mol 3.843705 eV -101.242427 H MutD_7_74.log       |           |           |           |
| 8                                                                | 5.671332  | 0.174342  | 0.580152  |
| 6                                                                | -3.530784 | 2.806210  | 0.042643  |
| 6                                                                | -4.423438 | 3.645986  | 0.431579  |
| 6                                                                | -1.043392 | -0.055657 | -0.606345 |
| 6                                                                | 3.132930  | -2.331239 | 0.012787  |
| 6                                                                | -5.845028 | -3.112548 | 0.099771  |
| 6                                                                | -0.342904 | -1.087019 | -0.658407 |
| 12                                                               | 1.169467  | -2.416619 | -0.446325 |
| 12                                                               | 0.453405  | 1.888369  | -0.239940 |
| 8                                                                | -6.609380 | -2.556147 | 0.749095  |
| 6                                                                | -1.556355 | 1.228761  | -0.476998 |
| 6                                                                | 3.443047  | 0.960380  | 0.272666  |
| 6                                                                | -2.592918 | 1.949704  | -0.249701 |
| 6                                                                | 4.466434  | -0.054724 | 0.389494  |
| 6                                                                | 3.872446  | -1.359504 | 0.221690  |
| 6                                                                | 2.424949  | 1.641891  | 0.121022  |
| 16                                                               |           |           |           |
| 88.797853 Kcal/mol 3.850644 eV -101.242172 H MutD_2_64.log       |           |           |           |
| 6                                                                | 3.708565  | -1.260662 | 0.339202  |
| 8                                                                | -0.576680 | -2.152436 | 0.171226  |
| 6                                                                | 2.437715  | -1.018435 | 0.147743  |
| 6                                                                | 4.956977  | -1.506750 | 0.526192  |
| 6                                                                | -1.576004 | 1.288025  | 1.148591  |
| 12                                                               | -2.453896 | -1.882416 | -0.343504 |
| 6                                                                | -0.584395 | 0.980632  | -1.512483 |
| 6                                                                | -0.565346 | 2.110003  | 1.397525  |
| 6                                                                | 1.248298  | -0.612992 | -0.084787 |
| 6                                                                | -1.123053 | 0.009026  | -0.650134 |

|                                                             |           |           |           |
|-------------------------------------------------------------|-----------|-----------|-----------|
| 6                                                           | -0.098580 | -0.970360 | -0.168606 |
| 6                                                           | 0.172939  | 1.771151  | -2.138602 |
| 12                                                          | 1.510717  | 1.746299  | -0.503394 |
| 6                                                           | -2.175699 | 0.350570  | 0.449211  |
| 8                                                           | -3.262238 | -0.423102 | 0.591932  |
| 6                                                           | 0.603498  | 2.566077  | 1.222396  |
| 16                                                          |           |           |           |
| 88.855483 Kcal/mol 3.853143 eV -101.242080 H Child_9_21.log |           |           |           |
| 12                                                          | -1.063411 | -1.654906 | 0.161761  |
| 6                                                           | 0.848853  | 2.834245  | 0.858240  |
| 8                                                           | 1.320826  | -3.850064 | 0.961589  |
| 6                                                           | -0.368240 | 2.857500  | 0.287533  |
| 6                                                           | 0.794413  | -2.996922 | 0.375794  |
| 6                                                           | 2.014278  | 2.482726  | 1.111228  |
| 6                                                           | -2.904683 | -0.342604 | 0.648913  |
| 6                                                           | -1.371001 | 2.611935  | -0.422438 |
| 6                                                           | 1.793542  | -0.764936 | -1.303014 |
| 6                                                           | 2.965548  | 1.584357  | 0.799726  |
| 6                                                           | -0.744681 | -0.550670 | -1.739249 |
| 6                                                           | 3.297671  | 0.525557  | 0.223709  |
| 12                                                          | -2.236247 | 0.892516  | -1.147718 |
| 6                                                           | 0.514835  | -0.702972 | -1.730837 |
| 6                                                           | 2.758966  | -0.376909 | -0.611378 |
| 8                                                           | -3.570966 | -0.377332 | 1.643675  |
| 16                                                          |           |           |           |
| 88.873788 Kcal/mol 3.853937 eV -101.242051 H Child_6_14.log |           |           |           |
| 8                                                           | 6.772347  | -0.706650 | -1.081607 |
| 6                                                           | -4.151579 | 0.757208  | -0.610590 |
| 6                                                           | 5.685648  | -0.397097 | -0.660927 |
| 6                                                           | -3.336762 | 1.644418  | -0.486356 |
| 6                                                           | 4.539947  | -0.066754 | -0.169881 |
| 8                                                           | -4.786987 | -0.420831 | -0.687585 |
| 6                                                           | 2.123847  | 0.356419  | 0.678574  |
| 6                                                           | -2.224823 | 2.403496  | -0.249097 |
| 6                                                           | 0.978059  | -0.396136 | 0.972997  |
| 6                                                           | -1.076998 | 2.805430  | 0.028655  |
| 6                                                           | 3.330767  | 0.125952  | 0.254018  |
| 6                                                           | -3.984740 | -1.487386 | -0.457022 |
| 6                                                           | -0.172865 | -0.838601 | 1.224237  |
| 6                                                           | -3.154274 | -2.410546 | -0.252710 |
| 12                                                          | 0.670168  | 1.938104  | 0.575405  |
| 12                                                          | -1.271856 | -2.434651 | 0.468107  |
| 16                                                          |           |           |           |
| 89.062461 Kcal/mol 3.862119 eV -101.241750 H Child_6_17.log |           |           |           |
| 8                                                           | 4.008302  | 3.060774  | 0.260574  |
| 12                                                          | 0.179979  | -5.118464 | 1.278345  |
| 6                                                           | 3.040539  | 2.282704  | 0.193039  |
| 6                                                           | -5.531069 | 0.752770  | -0.066393 |
| 6                                                           | 1.698670  | 2.620985  | 0.593560  |
| 6                                                           | -2.336173 | 0.333236  | -0.115303 |
| 6                                                           | 3.118788  | 0.926743  | -0.302435 |
| 8                                                           | -6.247657 | 1.612339  | -0.333653 |
| 6                                                           | 0.481150  | 2.527326  | 0.719537  |
| 6                                                           | -1.921307 | -0.793691 | -0.440378 |
| 6                                                           | 3.053342  | -0.240604 | -0.707331 |

|                                                              |           |           |           |
|--------------------------------------------------------------|-----------|-----------|-----------|
| 6                                                            | -0.954158 | -1.704071 | -0.671728 |
| 6                                                            | -0.817308 | 2.165121  | 0.667404  |
| 6                                                            | -1.799154 | 1.488715  | 0.350933  |
| 6                                                            | 0.194931  | -2.175542 | -0.736441 |
| 12                                                           | 2.198799  | -2.088791 | -0.971858 |
| 16                                                           |           |           |           |
| 89.075774 Kcal/mol 3.862696 eV -101.241729 H Child_12_40.log |           |           |           |
| 12                                                           | -4.003076 | -0.214505 | 0.632886  |
| 6                                                            | -0.780228 | 1.951190  | -0.811684 |
| 6                                                            | -0.522420 | -2.555688 | 0.197223  |
| 12                                                           | 0.676831  | -0.676102 | -1.488541 |
| 6                                                            | 0.701439  | -2.310565 | 0.209670  |
| 6                                                            | -0.307210 | 1.061834  | -1.506583 |
| 6                                                            | -1.877139 | -2.395063 | 0.263017  |
| 6                                                            | 1.893118  | -1.687235 | -0.056731 |
| 6                                                            | -3.769537 | 1.785742  | 0.663662  |
| 8                                                            | 5.671309  | 1.571291  | 0.714730  |
| 6                                                            | -2.686097 | 2.303339  | 0.355465  |
| 6                                                            | 4.771606  | 0.783103  | 0.580326  |
| 6                                                            | -3.044904 | -1.964659 | 0.240699  |
| 6                                                            | 3.829210  | -0.065350 | 0.424976  |
| 6                                                            | 2.901871  | -0.949445 | 0.278883  |
| 8                                                            | -1.514221 | 2.796719  | -0.060440 |
| 16                                                           |           |           |           |
| 89.385240 Kcal/mol 3.876116 eV -101.241236 H Child_5_37.log  |           |           |           |
| 8                                                            | -5.876518 | 1.780090  | 0.253922  |
| 8                                                            | 4.977819  | 0.295185  | 0.071934  |
| 6                                                            | -2.081441 | -2.288730 | -0.066242 |
| 6                                                            | -4.766779 | 1.349396  | 0.119578  |
| 12                                                           | -0.411539 | -3.391171 | 0.094308  |
| 6                                                            | 3.344886  | 3.187384  | 0.119255  |
| 6                                                            | 3.801678  | 0.567333  | 0.078228  |
| 6                                                            | -3.513964 | 1.073135  | -0.034468 |
| 6                                                            | 1.400885  | -2.530247 | 0.031980  |
| 6                                                            | 2.989462  | 1.920920  | 0.045501  |
| 6                                                            | 2.012873  | -1.451633 | 0.048072  |
| 6                                                            | 1.765338  | 1.061519  | -0.054463 |
| 6                                                            | 2.486270  | -0.133669 | 0.034842  |
| 6                                                            | -2.401871 | 0.339152  | -0.177024 |
| 6                                                            | -2.334505 | -1.067905 | -0.125092 |
| 12                                                           | -0.340743 | 0.994327  | -0.321628 |
| 16                                                           |           |           |           |
| 89.391993 Kcal/mol 3.876409 eV -101.241225 H MutD_9_66.log   |           |           |           |
| 6                                                            | -4.315810 | 0.095460  | 0.271552  |
| 12                                                           | -0.599477 | -1.819106 | -0.207017 |
| 6                                                            | -3.198453 | -2.142391 | 0.144739  |
| 6                                                            | -4.024280 | -1.229580 | 0.216040  |
| 6                                                            | -4.097701 | 1.311041  | 0.275391  |
| 8                                                            | -2.152347 | -2.900511 | 0.026054  |
| 12                                                           | -0.615108 | 1.856766  | -0.047735 |
| 6                                                            | 2.955546  | 0.148081  | -0.816083 |
| 6                                                            | 4.030231  | 0.352347  | -1.719250 |
| 6                                                            | -2.211337 | 3.102415  | 0.175330  |
| 8                                                            | 5.898755  | -0.240264 | 1.598226  |
| 6                                                            | -3.222276 | 2.356767  | 0.225701  |

|                                                              |           |           |           |
|--------------------------------------------------------------|-----------|-----------|-----------|
| 6                                                            | 0.390824  | 0.003928  | -0.287592 |
| 6                                                            | 5.150137  | -0.074299 | 0.685663  |
| 6                                                            | 1.659068  | 0.069060  | -0.542184 |
| 6                                                            | 4.318012  | 0.119551  | -0.285510 |
| 16                                                           |           |           |           |
| 89.439874 Kcal/mol 3.878485 eV -101.241149 H Child_18_13.log |           |           |           |
| 6                                                            | -4.364780 | -0.583257 | 0.135309  |
| 6                                                            | 5.820167  | -1.874166 | 0.777832  |
| 6                                                            | -4.377289 | -1.806485 | -0.175991 |
| 6                                                            | 4.809993  | -1.148525 | 0.451761  |
| 6                                                            | -3.951292 | 0.679395  | 0.431466  |
| 6                                                            | 3.831459  | -0.354879 | 0.137632  |
| 6                                                            | -3.178462 | 1.641652  | 0.560369  |
| 6                                                            | 2.731954  | 0.299183  | -0.099871 |
| 6                                                            | -2.003169 | 2.301950  | 0.522369  |
| 8                                                            | 2.648347  | 1.474159  | -0.880801 |
| 12                                                           | -2.373695 | -2.289798 | -0.328588 |
| 6                                                            | 1.585863  | 2.228568  | -0.597447 |
| 6                                                            | -0.833256 | 2.500424  | 0.272175  |
| 6                                                            | 0.457581  | 2.349955  | -0.160673 |
| 8                                                            | -0.669773 | -1.691860 | -0.272584 |
| 12                                                           | 0.790261  | -0.681976 | -0.029954 |
| 16                                                           |           |           |           |
| 89.453211 Kcal/mol 3.879063 eV -101.241128 H Child_11_15.log |           |           |           |
| 6                                                            | 6.660448  | 0.431811  | 0.775632  |
| 6                                                            | -4.165955 | 1.725165  | 0.653653  |
| 6                                                            | 5.472793  | 0.005449  | 0.438576  |
| 6                                                            | -4.737451 | 0.552864  | 1.034203  |
| 6                                                            | 7.834560  | 0.936716  | 1.091275  |
| 6                                                            | -3.160939 | 2.212614  | 0.107417  |
| 6                                                            | 4.327901  | -0.383473 | 0.089751  |
| 12                                                           | -3.306400 | -1.761220 | 0.521508  |
| 6                                                            | 3.120020  | -0.767790 | -0.288362 |
| 6                                                            | -4.967293 | -0.676997 | 1.228305  |
| 6                                                            | 1.958832  | -1.111184 | -0.638170 |
| 6                                                            | -1.979901 | 2.325150  | -0.493654 |
| 8                                                            | -0.160357 | 0.884168  | -1.372325 |
| 8                                                            | -1.710181 | -1.745943 | -0.310613 |
| 12                                                           | -0.120359 | -1.116417 | -0.928700 |
| 6                                                            | -1.015447 | 1.653981  | -0.940325 |
| 16                                                           |           |           |           |
| 89.853073 Kcal/mol 3.896403 eV -101.240491 H MutI_6_79.log   |           |           |           |
| 12                                                           | -4.235837 | -1.515087 | 0.241734  |
| 6                                                            | -1.645784 | 1.742429  | 0.324257  |
| 6                                                            | -3.834101 | 0.478472  | 0.587746  |
| 6                                                            | -2.483551 | -2.404307 | -0.346527 |
| 6                                                            | -2.880858 | 1.281503  | 0.621628  |
| 6                                                            | 2.559661  | 0.707377  | 0.302438  |
| 6                                                            | 1.185962  | -1.392458 | -0.301131 |
| 8                                                            | 4.864132  | -1.257982 | 0.121039  |
| 6                                                            | -1.323368 | -2.070590 | -0.538503 |
| 6                                                            | 2.451759  | -0.877405 | 0.009000  |
| 8                                                            | 3.658821  | 1.169100  | 0.601547  |
| 6                                                            | -1.148220 | 2.783262  | -0.404029 |
| 6                                                            | 3.677447  | -1.413336 | 0.009080  |



|                                                              |           |           |           |
|--------------------------------------------------------------|-----------|-----------|-----------|
| 12                                                           | 0.474731  | 1.219362  | -0.044237 |
| 6                                                            | 0.006529  | -1.707504 | -0.536666 |
| 6                                                            | -0.407199 | 3.582517  | -1.085735 |
| 16                                                           |           |           |           |
| 89.926077 Kcal/mol 3.899569 eV -101.240374 H Child_12_36.log |           |           |           |
| 6                                                            | 4.260976  | -2.072933 | 1.702081  |
| 6                                                            | 1.236906  | 2.509138  | 0.283742  |
| 8                                                            | 3.605906  | -1.505352 | 0.932120  |
| 6                                                            | 0.054645  | 1.771634  | 0.522335  |
| 6                                                            | 0.987153  | -2.116612 | -1.018221 |
| 6                                                            | -1.290249 | 1.518541  | 0.581141  |
| 6                                                            | -0.252665 | -2.160485 | -0.889839 |
| 6                                                            | -2.403973 | 1.009284  | 0.455626  |
| 6                                                            | -1.541179 | -1.820959 | -0.616294 |
| 12                                                           | 3.196592  | 2.323213  | -0.906216 |
| 12                                                           | 2.322433  | -0.587873 | -0.566720 |
| 8                                                            | -5.768306 | 0.102707  | 0.247968  |
| 6                                                            | -2.586656 | -1.252006 | -0.305437 |
| 6                                                            | -4.600728 | 0.029322  | 0.187126  |
| 6                                                            | 1.244240  | 1.058178  | 0.332839  |
| 6                                                            | -3.263320 | -0.073588 | 0.137321  |
| 16                                                           |           |           |           |
| 90.595375 Kcal/mol 3.928592 eV -101.239308 H Child_16_13.log |           |           |           |
| 12                                                           | -2.741729 | 2.308445  | 0.094719  |
| 6                                                            | 7.876540  | -0.746930 | 0.103658  |
| 6                                                            | -0.651721 | 2.073137  | 0.008787  |
| 6                                                            | 6.604083  | -0.573119 | 0.148191  |
| 6                                                            | -3.384325 | 0.297312  | -0.033968 |
| 6                                                            | 5.302080  | -0.389752 | 0.151035  |
| 6                                                            | 0.560235  | 1.742025  | -0.035331 |
| 6                                                            | 4.052208  | -0.272582 | 0.094061  |
| 12                                                           | -1.353863 | -0.402979 | -0.197814 |
| 8                                                            | 0.376473  | -1.308055 | -0.220469 |
| 6                                                            | -4.425542 | -0.491233 | 0.035944  |
| 6                                                            | -5.465788 | -1.248187 | 0.126593  |
| 6                                                            | 1.412627  | -0.536374 | -0.209955 |
| 6                                                            | 1.604636  | 0.828459  | -0.140636 |
| 6                                                            | 2.741021  | -0.079668 | 0.001439  |
| 8                                                            | -6.402624 | -2.002460 | 0.187749  |
| 16                                                           |           |           |           |
| 90.787291 Kcal/mol 3.936915 eV -101.239002 H Child_4_42.log  |           |           |           |
| 8                                                            | 4.175112  | -1.412392 | -0.251508 |
| 6                                                            | 1.160758  | 3.580809  | 0.351934  |
| 8                                                            | 0.826729  | -1.860531 | -0.031961 |
| 6                                                            | 1.853978  | 2.501738  | 0.253707  |
| 12                                                           | -0.693062 | -2.915490 | 0.253874  |
| 6                                                            | -0.362090 | 0.234445  | -0.204187 |
| 6                                                            | -4.942658 | 1.233570  | -0.287187 |
| 6                                                            | 0.812072  | -0.504664 | -0.122182 |
| 12                                                           | -0.482975 | 2.314220  | -0.104858 |
| 6                                                            | 3.229384  | -0.743585 | -0.155201 |
| 6                                                            | -4.057007 | 0.328509  | -0.110633 |
| 6                                                            | 2.150618  | 0.096846  | -0.065170 |
| 6                                                            | 2.629178  | 1.397910  | 0.138940  |
| 6                                                            | -2.282732 | -1.667570 | 0.238646  |

|           |           |           |                                 |
|-----------|-----------|-----------|---------------------------------|
| 6         | -2.952279 | -0.401936 | 0.108103                        |
| 6         | -1.556267 | -0.489633 | -0.066842                       |
| 16        |           |           |                                 |
| 91.169971 | Kcal/mol  | 3.953509  | eV -101.238392 H Child_6_44.log |
| 6         | -4.051013 | -3.514111 | -0.122828                       |
| 6         | 3.740184  | 2.303346  | 0.337406                        |
| 6         | -3.227752 | -2.589082 | 0.215782                        |
| 6         | 4.266241  | 1.387674  | -0.313579                       |
| 8         | -8.548201 | 1.911320  | -1.347522                       |
| 6         | 4.480270  | 0.180967  | -1.085809                       |
| 6         | -2.315295 | -1.703264 | 0.536695                        |
| 12        | 1.905593  | 2.218952  | 1.215054                        |
| 6         | -8.078477 | 2.632909  | -0.592760                       |
| 6         | 3.480870  | -0.799462 | -0.719067                       |
| 6         | -1.288546 | -1.014408 | 0.877918                        |
| 6         | 2.518459  | -1.477836 | -0.361210                       |
| 6         | -0.586708 | 0.138824  | 1.166250                        |
| 6         | 0.266001  | 1.027919  | 1.337866                        |
| 8         | 5.332833  | -0.002452 | -1.965470                       |
| 12        | 0.635869  | -1.778269 | 0.355275                        |
| 16        |           |           |                                 |
| 91.373257 | Kcal/mol  | 3.962324  | eV -101.238068 H Child_3_37.log |
| 6         | -3.538198 | 1.257348  | 0.034351                        |
| 8         | 3.527026  | -0.787737 | 0.034790                        |
| 6         | -4.827640 | 1.290252  | 0.062630                        |
| 12        | 1.488127  | -1.428517 | 0.030347                        |
| 6         | -2.212463 | 1.108946  | -0.000230                       |
| 6         | 3.610149  | 0.439260  | 0.005368                        |
| 6         | -2.031772 | -2.658818 | -0.062047                       |
| 6         | 3.467754  | 1.697475  | -0.023187                       |
| 6         | -1.377039 | -0.102488 | -0.047809                       |
| 6         | -0.023601 | 0.250657  | -0.023897                       |
| 8         | -1.348097 | 2.204931  | 0.020256                        |
| 6         | 2.293490  | 2.332160  | -0.026060                       |
| 6         | -1.857072 | -1.419979 | -0.087569                       |
| 6         | 1.050206  | 2.516978  | -0.016885                       |
| 6         | -0.038276 | 1.694351  | -0.003213                       |
| 12        | -0.198515 | -3.719350 | 0.027230                        |
| 16        |           |           |                                 |
| 91.495673 | Kcal/mol  | 3.967633  | eV -101.237873 H Child_1_59.log |
| 6         | 3.576239  | -1.230861 | 1.131624                        |
| 6         | -3.697931 | 1.430318  | -0.247592                       |
| 12        | 2.768385  | 0.722399  | 1.111971                        |
| 12        | -2.683484 | -1.496153 | -0.157548                       |
| 8         | 3.756066  | 1.016073  | -0.825833                       |
| 6         | -4.281548 | 0.374871  | 0.021676                        |
| 6         | 2.699733  | -1.833845 | 0.404338                        |
| 6         | -1.297367 | 2.205638  | -0.067811                       |
| 6         | 3.590501  | 1.094009  | -1.981074                       |
| 6         | -0.772264 | -2.093390 | -0.581522                       |
| 6         | 1.782713  | -2.517214 | -0.288967                       |
| 6         | 1.181902  | 1.914770  | 0.651729                        |
| 6         | -2.506675 | 2.086447  | -0.256699                       |
| 6         | 0.014052  | 2.148194  | 0.263077                        |
| 6         | 0.474951  | -2.275354 | -0.509901                       |

|           |           |           |           |                               |
|-----------|-----------|-----------|-----------|-------------------------------|
| 8         | -4.456647 | -0.833129 | 0.490040  |                               |
| 16        |           |           |           |                               |
| 91.854606 | Kcal/mol  | 3.983198  | eV        | -101.237301 H Child_3_11.log  |
| 6         | 4.813729  | -1.383475 | -0.418301 |                               |
| 8         | -3.938232 | 2.352699  | -0.693881 |                               |
| 6         | 3.363696  | -1.472347 | -0.260186 |                               |
| 6         | -3.114227 | 1.544146  | -0.217487 |                               |
| 6         | 3.947525  | -0.212549 | -0.386089 |                               |
| 6         | -2.248522 | -0.819463 | 0.078018  |                               |
| 12        | 1.323857  | -1.637151 | 0.172455  |                               |
| 6         | -2.217981 | 0.688549  | 0.141222  |                               |
| 6         | 3.585554  | 1.110935  | -0.243464 |                               |
| 12        | 1.060537  | 1.824340  | 0.549803  |                               |
| 6         | -0.076706 | -0.093153 | 0.399403  |                               |
| 6         | -3.307541 | -1.630794 | 0.003408  |                               |
| 6         | 2.999117  | 2.220464  | -0.057322 |                               |
| 8         | -4.165921 | -2.432374 | -0.095175 |                               |
| 6         | -0.862612 | -1.319036 | 0.206235  |                               |
| 6         | -0.845283 | 1.098579  | 0.362123  |                               |
| 16        |           |           |           |                               |
| 91.875911 | Kcal/mol  | 3.984122  | eV        | -101.237267 H Child_12_30.log |
| 6         | -4.595665 | -1.901221 | 0.225349  |                               |
| 8         | 3.379000  | 0.774100  | 0.263526  |                               |
| 6         | -3.542449 | 0.644969  | 0.684902  |                               |
| 6         | 3.770081  | -0.425374 | 0.489672  |                               |
| 6         | -3.874077 | -0.654607 | 0.398860  |                               |
| 6         | 0.856613  | -1.061611 | -0.711276 |                               |
| 6         | -2.779606 | 1.618171  | 0.654353  |                               |
| 6         | 4.299218  | -1.617154 | 1.133621  |                               |
| 6         | -3.200454 | -1.724747 | -0.181246 |                               |
| 6         | 1.886550  | -1.680297 | -0.283552 |                               |
| 6         | -0.555347 | 2.602566  | -0.060490 |                               |
| 6         | 3.131595  | -1.650702 | 0.277094  |                               |
| 6         | -1.673499 | 2.347429  | 0.397707  |                               |
| 12        | 1.663173  | 1.073382  | -0.608271 |                               |
| 8         | 0.635214  | 2.654633  | -0.540421 |                               |
| 12        | -1.200796 | -1.607915 | -0.719630 |                               |
| 16        |           |           |           |                               |
| 91.925296 | Kcal/mol  | 3.986263  | eV        | -101.237188 H MutD_14_76.log  |
| 12        | -1.186881 | -2.195646 | 0.416849  |                               |
| 6         | 1.991126  | 2.734787  | -0.118187 |                               |
| 6         | -0.192415 | -1.474174 | -2.715498 |                               |
| 6         | -1.751441 | 2.954280  | 0.172921  |                               |
| 6         | 1.988074  | -2.341239 | 0.797596  |                               |
| 6         | -3.218974 | -0.347661 | 0.416417  |                               |
| 8         | -0.688870 | -1.455323 | -1.666266 |                               |
| 6         | 3.233580  | -1.949198 | 0.624378  |                               |
| 6         | 2.861939  | 1.849995  | -0.322797 |                               |
| 6         | 0.765395  | 3.301705  | -0.002464 |                               |
| 12        | 3.601316  | 0.054843  | 0.208665  |                               |
| 6         | 0.742999  | -2.687413 | 0.738163  |                               |
| 8         | -2.998239 | -1.611635 | 0.470965  |                               |
| 6         | -0.467078 | 3.356031  | 0.081930  |                               |
| 6         | -3.230992 | 0.879973  | 0.382657  |                               |
| 6         | -2.634937 | 2.093797  | 0.287590  |                               |

16  
91.941694 Kcal/mol 3.986974 eV -101.237162 H MutD\_5\_74.log  
8 -5.138039 2.696055 -1.684426  
6 -1.439600 -2.777124 -0.016134  
6 -4.920480 3.103648 -0.630953  
6 1.882708 -1.820306 -0.802853  
8 -2.072979 -3.756243 -0.070852  
6 2.912384 2.572381 0.760412  
12 4.526821 1.598219 -0.117562  
6 -0.314992 0.584821 0.794537  
6 -0.633807 -1.696756 0.039861  
6 -3.738322 -0.550252 1.408201  
6 0.600836 1.401178 0.882421  
6 0.700822 -1.808472 -0.431255  
12 3.738405 -0.964923 -0.984980  
6 -1.205426 -0.492366 0.640631  
6 -2.516022 -0.482735 1.027805  
6 1.756138 2.112975 0.872780

16  
92.143260 Kcal/mol 3.995715 eV -101.236841 H Child\_2\_8.log  
8 -0.183966 -0.043879 0.061926  
6 3.685833 0.728087 -0.924781  
6 -0.709913 -2.632933 0.266357  
6 3.112130 1.753901 -0.417351  
6 -0.806800 -1.226283 0.067763  
6 2.018655 2.440416 0.100205  
8 3.281897 -2.904454 0.304167  
6 0.837414 2.665428 0.424908  
6 2.788878 -1.876799 0.414323  
6 -3.180334 1.691849 0.162101  
6 -3.995142 -0.639707 -0.333687  
6 -3.271815 -1.641983 -0.455342  
6 -3.906955 0.712595 -0.134717  
6 -1.949576 -1.938355 -0.153965  
12 -1.102721 1.854351 0.365578  
12 1.726246 0.093096 -0.117547

16  
92.175270 Kcal/mol 3.997103 eV -101.236790 H Child\_15\_8.log  
6 0.521716 -3.394976 0.331898  
12 -2.732817 0.975013 -0.133713  
6 2.700867 -0.937727 -0.059627  
8 -1.917966 2.844183 0.022417  
6 0.630912 -2.073918 0.186400  
6 -0.714162 2.409723 0.110799  
6 1.354229 -0.836459 0.086571  
6 -0.543652 0.921853 0.074251  
6 3.812565 -0.311725 -0.214783  
6 -3.946014 -0.674379 -0.338954  
6 -0.787461 -2.602708 0.154952  
6 0.741246 0.490649 0.138486  
8 4.914967 0.126918 -0.385648  
6 -3.145994 -1.627677 -0.173864  
6 -1.994374 -2.302423 -0.009711  
12 1.419877 2.514137 0.232658

92.184631 Kcal/mol 3.997509 eV -101.236775 H Original3D\_0\_34.log

|    |           |           |           |
|----|-----------|-----------|-----------|
| 6  | -0.501206 | -3.074305 | -1.327279 |
| 6  | -1.393159 | -2.179518 | -1.537977 |
| 12 | -1.252041 | 2.922672  | -0.782386 |
| 12 | 1.379055  | -2.724577 | -0.765950 |
| 6  | 1.568945  | 3.010725  | 0.288357  |
| 8  | -3.299964 | -0.722038 | 2.795372  |
| 8  | -2.340424 | 1.445989  | -1.016992 |
| 6  | 0.478080  | 3.515499  | -0.001539 |
| 6  | -4.173875 | -1.461014 | 2.690898  |
| 6  | 3.125270  | 1.032011  | 0.606944  |
| 6  | -2.281772 | 0.143376  | -1.256585 |
| 6  | 2.570833  | 2.135439  | 0.580845  |
| 6  | 3.322378  | -0.345691 | 0.685251  |
| 6  | -2.130052 | -1.036367 | -1.497983 |
| 6  | 3.832148  | -1.547811 | 1.290165  |
| 6  | 2.848900  | -1.553803 | 0.204404  |

16

92.303366 Kcal/mol 4.002658 eV -101.236586 H Child\_6\_49.log

|    |           |           |           |
|----|-----------|-----------|-----------|
| 12 | -1.060741 | 1.761723  | 0.166379  |
| 6  | -4.245976 | 3.374529  | -0.142289 |
| 6  | 0.190051  | 0.031634  | 0.089621  |
| 6  | -3.815397 | 0.593975  | -0.206494 |
| 6  | 1.473106  | -0.204531 | 0.235927  |
| 6  | -3.245736 | -0.519341 | -0.194720 |
| 6  | 2.787517  | -0.254849 | 0.261462  |
| 6  | -3.903920 | 1.978243  | -0.156976 |
| 6  | 4.061258  | -0.164872 | 0.170696  |
| 6  | -4.045845 | -4.003734 | -0.119999 |
| 8  | 7.787289  | 0.207395  | -0.344219 |
| 12 | -1.341388 | -1.304990 | 0.151936  |
| 6  | 6.605235  | 0.071014  | -0.155410 |
| 6  | -2.869320 | 2.874056  | 0.044583  |
| 6  | 5.356465  | -0.078849 | 0.068436  |
| 8  | -2.944674 | -3.665449 | -0.054381 |

16

92.532573 Kcal/mol 4.012597 eV -101.236220 H Child\_7\_10.log

|    |           |           |           |
|----|-----------|-----------|-----------|
| 6  | 4.345638  | 0.643966  | -0.431934 |
| 6  | -3.078766 | -2.349089 | 0.145221  |
| 6  | -0.558461 | 4.232044  | 0.604202  |
| 6  | -3.902626 | -1.450476 | -0.094038 |
| 8  | 4.430073  | -0.678035 | -0.201870 |
| 6  | -1.758505 | -2.611417 | 0.304405  |
| 6  | 2.923997  | 0.985627  | -0.167296 |
| 6  | -3.925351 | -0.109975 | -0.350085 |
| 8  | -0.892737 | 3.165933  | 0.295589  |
| 6  | -0.609281 | -2.134852 | 0.277502  |
| 6  | 1.742220  | 0.612852  | -0.009416 |
| 6  | 0.537854  | -1.363663 | 0.212381  |
| 6  | 0.454367  | 0.032326  | -0.010143 |
| 6  | -3.482572 | 1.053378  | -0.526868 |
| 12 | -1.398198 | 1.114932  | -0.237270 |
| 12 | 2.695718  | -1.543892 | 0.197826  |

16

92.889857 Kcal/mol 4.028091 eV -101.235651 H Child\_4\_19.log

|           |           |           |                                  |
|-----------|-----------|-----------|----------------------------------|
| 12        | 2.330888  | 1.976238  | -0.001165                        |
| 8         | -6.724332 | 0.556275  | -0.015922                        |
| 6         | 4.399563  | 1.895658  | -0.025460                        |
| 6         | -5.660725 | 0.060551  | -0.010675                        |
| 6         | 4.427673  | 0.634048  | -0.017237                        |
| 6         | -4.502558 | -0.504115 | -0.008982                        |
| 6         | 0.600254  | 0.902024  | 0.021193                         |
| 6         | -3.322037 | -0.936566 | -0.006437                        |
| 6         | -0.643693 | 1.250867  | 0.020343                         |
| 6         | -2.112506 | -1.436356 | -0.003810                        |
| 6         | 4.263066  | -0.736240 | -0.009934                        |
| 12        | 1.183578  | -1.156133 | 0.018782                         |
| 6         | 4.591333  | -2.143777 | -0.008819                        |
| 6         | -0.884976 | -1.733500 | 0.002134                         |
| 6         | 3.218451  | -1.650665 | 0.004539                         |
| 8         | -1.827751 | 1.512118  | 0.021855                         |
| 16        |           |           |                                  |
| 92.897931 | Kcal/mol  | 4.028441  | eV -101.235638 H Child_1_18.log  |
| 6         | 8.751446  | -1.288172 | 0.429611                         |
| 6         | 0.313346  | 1.598537  | 0.124784                         |
| 6         | 7.568822  | -0.804473 | 0.301095                         |
| 6         | -0.930319 | 1.780819  | 0.160417                         |
| 6         | 6.359426  | -0.337782 | 0.206822                         |
| 8         | -4.368987 | 0.397539  | -0.445512                        |
| 6         | 5.171842  | 0.085643  | 0.126674                         |
| 8         | -7.138997 | -0.851074 | 1.445635                         |
| 6         | 3.926863  | 0.429372  | 0.048358                         |
| 6         | -6.503678 | -1.158823 | 0.536202                         |
| 6         | 2.700333  | 0.708012  | -0.036836                        |
| 6         | -2.238111 | 1.597508  | 0.014339                         |
| 6         | -3.435409 | 1.211674  | -0.145325                        |
| 6         | 1.369624  | 0.735109  | -0.105984                        |
| 12        | -0.388981 | -0.595679 | -0.655667                        |
| 12        | -3.466122 | -1.380675 | -0.841160                        |
| 16        |           |           |                                  |
| 93.223510 | Kcal/mol  | 4.042559  | eV -101.235119 H Child_12_52.log |
| 6         | 4.557179  | 0.668468  | -0.469738                        |
| 8         | -5.721139 | -0.600136 | -0.750948                        |
| 6         | 4.486314  | -0.577946 | -0.595404                        |
| 6         | -4.604500 | -0.382391 | -0.496930                        |
| 8         | 3.891770  | -1.701156 | -0.598438                        |
| 6         | -3.292986 | -0.162637 | -0.257545                        |
| 6         | 3.334883  | 1.250661  | -0.160492                        |
| 6         | -2.613824 | 1.068359  | -0.562195                        |
| 6         | 2.103424  | 1.357577  | 0.099285                         |
| 6         | -2.557036 | -1.115287 | 0.479390                         |
| 12        | 2.020493  | -1.013397 | -0.060591                        |
| 6         | -1.315159 | -1.106990 | 0.819244                         |
| 12        | 0.107960  | 1.798284  | 0.544721                         |
| 6         | -1.702988 | 1.908413  | -0.457482                        |
| 6         | -0.338433 | -0.197582 | 1.604385                         |
| 6         | 0.125379  | -1.212029 | 0.828403                         |
| 16        |           |           |                                  |
| 93.272313 | Kcal/mol  | 4.044675  | eV -101.235042 H Child_3_53.log  |
| 8         | 5.604339  | 0.028632  | -0.463657                        |

|           |           |           |           |                              |
|-----------|-----------|-----------|-----------|------------------------------|
| 6         | -4.239386 | -1.623374 | 0.196469  |                              |
| 6         | 4.468883  | -0.230905 | -0.211029 |                              |
| 6         | -3.138371 | 0.846675  | -0.559057 |                              |
| 8         | -0.558327 | 2.144462  | 2.477327  |                              |
| 6         | 1.070916  | -1.636465 | 0.603518  |                              |
| 6         | -3.467948 | -0.469491 | -0.227014 |                              |
| 6         | 2.235518  | -1.217814 | 0.421916  |                              |
| 6         | -2.740638 | 2.053159  | -0.624051 |                              |
| 6         | 3.180541  | -0.335262 | -0.023789 |                              |
| 6         | -1.468827 | -1.938054 | 0.416370  |                              |
| 6         | -0.013593 | 1.709591  | 1.596209  |                              |
| 6         | -2.774675 | -1.583653 | 0.193561  |                              |
| 6         | -0.237585 | -1.870292 | 0.492833  |                              |
| 12        | 1.353732  | 0.795832  | -0.622631 |                              |
| 12        | -1.155158 | 0.903381  | -1.857784 |                              |
| 16        |           |           |           |                              |
| 93.363695 | Kcal/mol  | 4.048638  | eV        | -101.234896 H MutD_13_66.log |
| 6         | 1.142373  | 1.138850  | 0.531885  |                              |
| 6         | -0.097740 | 1.783035  | 0.548587  |                              |
| 12        | 2.946283  | 2.226839  | -1.119239 |                              |
| 6         | -2.584063 | -1.337978 | -0.258734 |                              |
| 12        | 2.270542  | -0.576807 | -0.213612 |                              |
| 6         | 1.044414  | -2.148612 | -0.814653 |                              |
| 8         | -5.854468 | -0.016466 | 0.199231  |                              |
| 6         | -3.344856 | -0.175909 | 0.112152  |                              |
| 6         | 1.045957  | 2.547993  | 0.198979  |                              |
| 6         | 5.132158  | -1.626052 | 1.191647  |                              |
| 6         | -4.688152 | -0.117147 | 0.104099  |                              |
| 6         | -1.436884 | 1.478286  | 0.606313  |                              |
| 8         | 4.057407  | -1.315973 | 0.784832  |                              |
| 6         | -0.204470 | -2.174678 | -0.744361 |                              |
| 6         | -1.511770 | -1.846810 | -0.536601 |                              |
| 6         | -2.534534 | 0.955543  | 0.414305  |                              |
| 16        |           |           |           |                              |
| 93.488741 | Kcal/mol  | 4.054061  | eV        | -101.234697 H MutD_17_48.log |
| 6         | 6.669524  | -1.864038 | 1.592397  |                              |
| 6         | 2.668080  | 0.340597  | -0.797989 |                              |
| 6         | 1.635221  | 1.322692  | -0.512453 |                              |
| 6         | -3.109310 | 0.183982  | 0.222305  |                              |
| 6         | -0.521175 | 2.072129  | 0.710977  |                              |
| 8         | 0.332444  | -0.198465 | -1.957459 |                              |
| 6         | -4.908418 | -1.683908 | 0.246091  |                              |
| 6         | 3.792465  | -0.230316 | -0.379710 |                              |
| 6         | -3.997012 | -0.777472 | 0.207022  |                              |
| 6         | 1.389671  | 0.364092  | -1.463383 |                              |
| 12        | -1.306540 | 0.283638  | -0.976904 |                              |
| 6         | 4.749707  | -0.758508 | 0.242121  |                              |
| 6         | 0.640619  | 1.894265  | 0.282193  |                              |
| 8         | -5.734423 | -2.554937 | 0.271213  |                              |
| 12        | -2.462181 | 1.778882  | 1.470957  |                              |
| 6         | 5.730712  | -1.317354 | 0.910652  |                              |
| 16        |           |           |           |                              |
| 93.684343 | Kcal/mol  | 4.062543  | eV        | -101.234385 H MutI_13_45.log |
| 6         | 3.608614  | 0.597134  | 0.118338  |                              |
| 6         | 2.294354  | 2.815146  | 0.092240  |                              |

|                                                             |           |           |           |
|-------------------------------------------------------------|-----------|-----------|-----------|
| 6                                                           | 3.228938  | -1.962164 | 0.031292  |
| 6                                                           | -0.145337 | 3.713188  | 0.089079  |
| 6                                                           | -5.614755 | -1.386815 | 0.412614  |
| 8                                                           | -0.720938 | -1.589031 | -0.164079 |
| 6                                                           | -2.228963 | 0.481392  | -0.266351 |
| 6                                                           | 2.957800  | 1.718342  | 0.103776  |
| 6                                                           | 1.053492  | 3.322792  | 0.064123  |
| 8                                                           | 2.647301  | -3.139094 | -0.030407 |
| 6                                                           | 3.388412  | -0.719844 | 0.093418  |
| 6                                                           | -4.418074 | -1.033578 | 0.179980  |
| 6                                                           | -1.762165 | -0.810532 | -0.188095 |
| 12                                                          | -1.765225 | 2.497916  | -0.173680 |
| 6                                                           | -3.153786 | -0.629831 | -0.053063 |
| 12                                                          | 0.876719  | -2.398447 | -0.035338 |
| 16                                                          |           |           |           |
| 93.758873 Kcal/mol 4.065775 eV -101.234266 H MutD_14_56.log |           |           |           |
| 12                                                          | -0.256864 | 2.156990  | -0.284580 |
| 6                                                           | -1.298502 | -2.582352 | -0.450288 |
| 6                                                           | 1.671760  | 1.616481  | -0.670537 |
| 6                                                           | -2.197363 | -1.687665 | 0.099930  |
| 8                                                           | 2.893958  | -1.440492 | 0.732807  |
| 6                                                           | -0.110190 | -2.608993 | -0.891022 |
| 6                                                           | 3.965559  | 0.718296  | 0.202106  |
| 6                                                           | -2.341334 | 2.589500  | 0.030426  |
| 6                                                           | 3.642694  | -0.434967 | 0.585760  |
| 6                                                           | 2.862933  | 1.379514  | -0.326189 |
| 6                                                           | -2.976644 | 0.175861  | 0.431489  |
| 6                                                           | -3.001854 | 1.555093  | 0.308450  |
| 8                                                           | -0.505525 | 0.127671  | 0.283792  |
| 6                                                           | -3.635830 | -1.148764 | 0.089107  |
| 12                                                          | 1.208945  | -0.868548 | -0.320819 |
| 6                                                           | -1.669967 | -0.398461 | 0.446101  |
| 16                                                          |           |           |           |
| 93.969040 Kcal/mol 4.074888 eV -101.233931 H MutI_15_79.log |           |           |           |
| 6                                                           | -3.776918 | -1.304638 | 0.016687  |
| 6                                                           | -1.450028 | 1.635104  | -0.067258 |
| 12                                                          | 0.417587  | -3.301879 | 0.313270  |
| 6                                                           | -1.157463 | -1.698110 | 0.054699  |
| 6                                                           | 3.532280  | 0.725244  | 0.006440  |
| 8                                                           | 4.581923  | 0.182403  | -0.001906 |
| 6                                                           | 2.337026  | 1.232166  | 0.056385  |
| 8                                                           | -0.111931 | 3.725900  | 0.205579  |
| 6                                                           | -0.236057 | 0.776521  | -0.000344 |
| 6                                                           | -0.947297 | 2.934894  | -0.029588 |
| 6                                                           | -0.194468 | -0.707655 | -0.106655 |
| 6                                                           | 1.085325  | -1.263884 | -0.328545 |
| 6                                                           | 2.081057  | -2.012630 | -0.419650 |
| 6                                                           | -2.532372 | -1.484153 | 0.029802  |
| 12                                                          | -3.301782 | 0.671605  | -0.117756 |
| 6                                                           | 1.067315  | 1.216619  | 0.125437  |
| 16                                                          |           |           |           |
| 94.083223 Kcal/mol 4.079840 eV -101.233749 H Child_3_23.log |           |           |           |
| 6                                                           | 4.373637  | 1.261393  | 0.133529  |
| 8                                                           | -6.937417 | 1.480207  | 0.443049  |
| 6                                                           | 2.500791  | -0.629869 | 0.195659  |



|                                                              |           |           |           |
|--------------------------------------------------------------|-----------|-----------|-----------|
| 6                                                            | -5.806087 | 1.230064  | 0.151266  |
| 6                                                            | 3.254121  | 0.635662  | 0.138000  |
| 6                                                            | -4.610210 | 0.916048  | -0.160127 |
| 6                                                            | 5.530097  | 1.863191  | 0.078355  |
| 6                                                            | -3.409254 | 0.451928  | -0.184936 |
| 6                                                            | 1.775629  | 0.496886  | -0.007167 |
| 6                                                            | -2.173712 | 0.056776  | -0.282827 |
| 6                                                            | 6.612785  | 2.568058  | -0.054271 |
| 6                                                            | -1.513760 | -1.183544 | -0.181139 |
| 8                                                            | 0.135921  | -3.100217 | -0.071534 |
| 6                                                            | -0.755052 | -2.146029 | -0.143002 |
| 12                                                           | 1.902787  | -2.585737 | 0.229906  |
| 12                                                           | -0.257949 | 0.905462  | -0.319252 |
| 16                                                           |           |           |           |
| 94.137528 Kcal/mol 4.082195 eV -101.233663 H Child_14_17.log |           |           |           |
| 6                                                            | 0.174303  | 2.563495  | -0.334551 |
| 8                                                            | 5.281212  | -0.730435 | 0.176772  |
| 12                                                           | -1.538366 | 1.478988  | -0.287621 |
| 6                                                            | 4.072380  | -0.451638 | 0.120063  |
| 12                                                           | -3.792836 | -3.554139 | -0.022919 |
| 6                                                            | 2.966763  | -1.363655 | 0.142295  |
| 8                                                            | -3.208915 | 2.722226  | 0.163566  |
| 6                                                            | 1.762887  | -1.672705 | 0.114349  |
| 6                                                            | 1.385759  | 2.294752  | -0.237688 |
| 6                                                            | 3.500634  | 0.874808  | 0.007824  |
| 6                                                            | -4.005937 | 3.426530  | 0.635156  |
| 6                                                            | 0.446429  | -1.826748 | 0.063904  |
| 6                                                            | -1.945490 | -0.565496 | -0.145232 |
| 6                                                            | -0.805114 | -1.632665 | -0.011894 |
| 6                                                            | -2.258769 | -1.860231 | -0.072916 |
| 6                                                            | 2.605495  | 1.708134  | -0.114014 |
| 16                                                           |           |           |           |
| 94.724731 Kcal/mol 4.107658 eV -101.232727 H Child_5_33.log  |           |           |           |
| 6                                                            | 3.349509  | 1.874030  | 0.218279  |
| 6                                                            | -5.419737 | -0.034311 | -0.334555 |
| 6                                                            | 2.576126  | 2.834147  | 0.095145  |
| 6                                                            | -4.072388 | -0.027077 | 0.164064  |
| 6                                                            | 3.954545  | -0.604470 | 0.264442  |
| 6                                                            | -5.183481 | -0.052854 | 1.080822  |
| 6                                                            | 3.893543  | 0.630383  | 0.291901  |
| 6                                                            | -2.739064 | -0.032081 | -0.047224 |
| 6                                                            | 3.482217  | -1.872459 | 0.150099  |
| 6                                                            | -1.470595 | 0.618248  | -0.227089 |
| 12                                                           | 0.585105  | 2.899125  | -0.206966 |
| 6                                                            | -1.502180 | -0.741382 | -0.184440 |
| 6                                                            | 2.736038  | -2.857554 | -0.004952 |
| 12                                                           | 0.744654  | -2.661073 | -0.187032 |
| 8                                                            | -0.895565 | -1.896334 | -0.206413 |
| 8                                                            | -0.802473 | 1.738294  | -0.302459 |
| 16                                                           |           |           |           |
| 94.835905 Kcal/mol 4.112479 eV -101.232550 H Child_5_61.log  |           |           |           |
| 12                                                           | -4.003403 | 0.154618  | 0.189006  |
| 8                                                            | 5.302611  | -0.299377 | 0.109816  |
| 8                                                            | -2.937865 | -1.547055 | 0.077782  |
| 6                                                            | 4.154619  | -0.116422 | 0.075253  |

|                                                             |           |           |           |
|-------------------------------------------------------------|-----------|-----------|-----------|
| 6                                                           | -1.714382 | -1.134145 | 0.015274  |
| 6                                                           | 2.808605  | 0.056122  | 0.023499  |
| 6                                                           | -0.487535 | -1.921627 | -0.029480 |
| 6                                                           | 2.212696  | 1.365531  | -0.100986 |
| 6                                                           | -2.298094 | 1.339971  | -0.247073 |
| 6                                                           | 0.889027  | 1.510978  | -0.067524 |
| 6                                                           | -1.380583 | 0.294771  | -0.092439 |
| 6                                                           | 2.017590  | -1.145838 | 0.116132  |
| 6                                                           | -0.458224 | -3.238647 | -0.220317 |
| 6                                                           | 0.075415  | 0.354396  | -0.105911 |
| 12                                                          | -0.818798 | 2.869252  | 0.022830  |
| 6                                                           | 0.672271  | -0.950922 | -0.040229 |
| 16                                                          |           |           |           |
| 94.872154 Kcal/mol 4.114051 eV -101.232492 H MutD_16_62.log |           |           |           |
| 6                                                           | 2.566043  | 2.620164  | 0.004053  |
| 6                                                           | 0.309024  | -2.731252 | -0.001847 |
| 12                                                          | -2.546340 | -1.204283 | 0.003589  |
| 6                                                           | 3.680126  | 1.847247  | 0.004820  |
| 6                                                           | 4.317227  | 0.787386  | 0.003214  |
| 6                                                           | -0.881553 | -2.373649 | -0.000529 |
| 6                                                           | 1.388138  | 3.023308  | 0.001594  |
| 6                                                           | -3.499634 | 1.085814  | -0.005404 |
| 6                                                           | 4.425783  | -0.556591 | 0.000205  |
| 6                                                           | -2.282012 | 1.366148  | -0.004274 |
| 6                                                           | 1.658676  | -2.825982 | -0.003238 |
| 6                                                           | 2.857748  | -2.525419 | -0.003486 |
| 8                                                           | -4.498329 | -0.949808 | 0.009288  |
| 8                                                           | -4.707937 | 0.593874  | -0.003141 |
| 6                                                           | 3.907005  | -1.681096 | -0.002192 |
| 12                                                          | -0.539434 | 2.423534  | -0.004146 |
| 16                                                          |           |           |           |
| 95.337183 Kcal/mol 4.134217 eV -101.231751 H Child_3_58.log |           |           |           |
| 6                                                           | 1.837809  | -0.943852 | 0.286275  |
| 6                                                           | -3.295378 | 1.779959  | 0.782291  |
| 8                                                           | 4.106098  | -1.314932 | 0.931920  |
| 8                                                           | -3.780659 | 2.265952  | 1.703167  |
| 6                                                           | 0.700999  | -1.706855 | 0.238253  |
| 12                                                          | -2.141156 | 0.393302  | -0.783522 |
| 6                                                           | 3.254044  | -0.542608 | 0.450317  |
| 6                                                           | 1.612011  | 2.855297  | -0.809420 |
| 6                                                           | -0.279856 | -2.682703 | 0.244266  |
| 6                                                           | -3.440681 | -1.304238 | -0.837981 |
| 6                                                           | 0.596464  | -0.315559 | -0.130926 |
| 6                                                           | 0.802750  | 1.889320  | -0.691270 |
| 6                                                           | -1.488020 | -2.793520 | -0.015065 |
| 6                                                           | -0.093625 | 0.781878  | -0.561191 |
| 6                                                           | -2.647630 | -2.191821 | -0.419856 |
| 12                                                          | 3.144754  | 1.560038  | -0.241049 |
| 16                                                          |           |           |           |
| 95.481684 Kcal/mol 4.140483 eV -101.231521 H MutD_16_52.log |           |           |           |
| 8                                                           | 4.642586  | 0.636364  | 0.268972  |
| 6                                                           | -3.673749 | 1.850424  | 0.125532  |
| 6                                                           | 2.253792  | 1.367855  | -0.196118 |
| 6                                                           | -0.282902 | -2.762096 | -0.174878 |
| 6                                                           | 3.453086  | 1.089414  | 0.020134  |

|           |           |           |                                  |
|-----------|-----------|-----------|----------------------------------|
| 12        | 2.551245  | -1.206862 | -0.076431                        |
| 6         | -4.372864 | -0.571391 | 0.181801                         |
| 12        | 0.513701  | 2.427034  | -0.223027                        |
| 6         | -3.861453 | -1.695784 | 0.098004                         |
| 8         | 4.471603  | -0.919619 | 0.278693                         |
| 6         | -2.825322 | -2.547831 | -0.016765                        |
| 6         | -1.631312 | -2.852996 | -0.113465                        |
| 6         | 0.904666  | -2.395691 | -0.198427                        |
| 6         | -2.572375 | 2.635957  | 0.025563                         |
| 6         | -4.271474 | 0.772169  | 0.199540                         |
| 6         | -1.402238 | 3.047298  | -0.082227                        |
| 16        |           |           |                                  |
| 95.523945 | Kcal/mol  | 4.142316  | eV -101.231453 H Child_10_20.log |
| 6         | 4.309072  | -0.897027 | -0.176638                        |
| 8         | -3.900838 | 0.365731  | 0.345996                         |
| 6         | 4.017961  | 0.325871  | -0.430492                        |
| 6         | -2.936347 | 1.197776  | 0.727973                         |
| 12        | 3.049452  | -2.378683 | 0.408759                         |
| 6         | -1.998235 | 1.970057  | 0.944059                         |
| 6         | 3.778929  | 1.596674  | -0.736309                        |
| 6         | -3.519403 | -0.735409 | -0.505578                        |
| 6         | 2.664642  | 2.311552  | -0.519350                        |
| 6         | -2.351531 | -1.418690 | -0.101665                        |
| 6         | 1.090287  | -2.909496 | 0.483697                         |
| 12        | -0.275300 | 2.862099  | 0.427630                         |
| 6         | 1.609922  | 2.976018  | -0.302571                        |
| 6         | -1.320614 | -2.033729 | 0.123306                         |
| 6         | -0.093280 | -2.567883 | 0.350471                         |
| 8         | -4.198942 | -0.952640 | -1.493257                        |
| 16        |           |           |                                  |
| 95.658081 | Kcal/mol  | 4.148132  | eV -101.231240 H MutD_13_62.log  |
| 6         | 1.001736  | -2.888750 | -0.187516                        |
| 6         | 2.175055  | -2.504381 | -0.248493                        |
| 6         | 4.499582  | -1.027779 | 0.095642                         |
| 8         | 5.698209  | -1.163332 | 0.326764                         |
| 6         | -0.340758 | -2.745165 | -0.123153                        |
| 6         | -1.402169 | 0.560545  | 0.135128                         |
| 6         | 3.331704  | -0.193074 | -0.073381                        |
| 6         | -1.700964 | -0.653415 | 0.075595                         |
| 12        | -0.262704 | 4.840234  | -0.173615                        |
| 6         | -1.263185 | -1.917848 | -0.007748                        |
| 8         | -8.435833 | -0.678673 | 0.299545                         |
| 6         | 0.278540  | 2.555047  | 0.075283                         |
| 6         | -0.619103 | 1.645446  | 0.131716                         |
| 12        | 2.073414  | 1.476602  | 0.009137                         |
| 6         | -9.137565 | -1.417869 | -0.230282                        |
| 6         | 3.205873  | -1.590425 | -0.148914                        |
| 16        |           |           |                                  |
| 95.778472 | Kcal/mol  | 4.153353  | eV -101.231048 H Child_9_28.log  |
| 8         | 5.636667  | 0.718027  | 0.174975                         |
| 6         | -5.928677 | 1.279519  | -0.393717                        |
| 6         | 4.464831  | 0.654457  | 0.096658                         |
| 6         | -4.718019 | 1.462978  | 0.036462                         |
| 6         | 2.405449  | 0.459604  | -1.214760                        |
| 6         | -3.462819 | 1.330380  | 0.368538                         |

|                                                             |           |           |           |
|-------------------------------------------------------------|-----------|-----------|-----------|
| 12                                                          | -1.579147 | -2.411145 | -0.169647 |
| 6                                                           | 1.133261  | 0.030491  | 1.477883  |
| 6                                                           | 3.135069  | 0.562667  | 0.015475  |
| 6                                                           | -2.264667 | 0.982967  | 0.657639  |
| 6                                                           | 1.442487  | 0.259504  | -1.969234 |
| 6                                                           | -1.130019 | 0.393842  | 0.808172  |
| 12                                                          | -0.444727 | -0.552128 | -1.968850 |
| 6                                                           | -0.191256 | -0.462708 | 1.320104  |
| 6                                                           | 2.251615  | 0.397018  | 1.132454  |
| 8                                                           | -0.453798 | -1.786157 | 1.281014  |
| 16                                                          |           |           |           |
| 95.886651 Kcal/mol 4.158044 eV -101.230875 H Child_5_28.log |           |           |           |
| 6                                                           | -4.612373 | 0.270536  | 0.189537  |
| 8                                                           | 4.545710  | -0.741175 | -0.206445 |
| 12                                                          | -3.094665 | -1.199736 | 0.153075  |
| 12                                                          | 2.003076  | 2.626245  | -0.017640 |
| 6                                                           | -3.635601 | 1.072810  | 0.151711  |
| 6                                                           | 3.507312  | -0.166872 | -0.091500 |
| 6                                                           | -0.947247 | -1.150897 | -0.084108 |
| 6                                                           | 2.475121  | 0.635424  | -0.008031 |
| 8                                                           | -1.577763 | -1.499868 | -1.150136 |
| 6                                                           | 1.036262  | 0.433720  | -0.003302 |
| 6                                                           | -2.392404 | 1.629822  | 0.137065  |
| 6                                                           | 0.208336  | 1.567842  | 0.080929  |
| 6                                                           | 1.272033  | -1.993681 | 0.157142  |
| 6                                                           | 0.498923  | -0.911429 | -0.033682 |
| 6                                                           | -1.146622 | 1.598140  | 0.121190  |
| 6                                                           | 1.962176  | -2.850374 | 0.920954  |
| 16                                                          |           |           |           |
| 95.967472 Kcal/mol 4.161549 eV -101.230747 H Child_3_19.log |           |           |           |
| 8                                                           | -5.676752 | -1.344512 | -0.128283 |
| 6                                                           | 4.861835  | -0.822419 | -1.392808 |
| 6                                                           | 8.727591  | 0.677159  | 0.289324  |
| 6                                                           | 3.646362  | -0.650318 | -1.056268 |
| 6                                                           | -4.704053 | 0.857165  | 0.206857  |
| 12                                                          | -0.179773 | -1.840105 | 0.605389  |
| 6                                                           | -3.950969 | 1.847815  | 0.133207  |
| 6                                                           | 2.394598  | -0.608581 | -0.626692 |
| 6                                                           | -4.718874 | -0.588559 | 0.119848  |
| 6                                                           | 1.190606  | -0.566863 | -0.176872 |
| 6                                                           | -2.747058 | 2.450683  | 0.045773  |
| 6                                                           | -2.096645 | -1.135265 | 0.436481  |
| 6                                                           | -1.517092 | 2.516684  | -0.119977 |
| 12                                                          | -0.272559 | 0.902025  | -0.392985 |
| 8                                                           | 8.041061  | 0.523634  | 1.190632  |
| 6                                                           | -3.334052 | -1.006837 | 0.299852  |
| 16                                                          |           |           |           |
| 95.992135 Kcal/mol 4.162618 eV -101.230707 H MutD_4_72.log  |           |           |           |
| 8                                                           | -0.581538 | 3.962843  | -0.051524 |
| 12                                                          | -2.225738 | 3.090632  | 0.267457  |
| 12                                                          | 7.984516  | -0.702626 | 0.504358  |
| 6                                                           | -0.271454 | -3.065779 | -0.197750 |
| 6                                                           | 1.557630  | -1.312702 | -0.408102 |
| 6                                                           | -3.525862 | 0.204614  | 0.280011  |
| 6                                                           | 1.386147  | 2.439155  | -0.386529 |

|           |           |           |                                      |
|-----------|-----------|-----------|--------------------------------------|
| 6         | -1.380318 | -3.569130 | -0.078252                            |
| 6         | 0.847740  | -2.319304 | -0.321749                            |
| 8         | -2.729228 | -3.581835 | 0.084813                             |
| 6         | 1.896602  | 1.189150  | -0.464582                            |
| 6         | 0.486706  | 3.265715  | -0.246075                            |
| 6         | -3.491241 | -1.157372 | 0.225834                             |
| 6         | 1.998601  | -0.042696 | -0.470961                            |
| 6         | -3.246633 | -2.346116 | 0.169111                             |
| 6         | -3.361120 | 1.430445  | 0.311029                             |
| 16        |           |           |                                      |
| 96.128461 | Kcal/mol  | 4.168530  | eV -101.230490 H MutD_8_74.log       |
| 8         | -1.876472 | 2.022989  | 0.708293                             |
| 6         | 4.470306  | 0.301056  | 0.169247                             |
| 6         | -4.216187 | 1.851051  | -0.163288                            |
| 12        | -0.410903 | -2.505184 | -0.071269                            |
| 6         | -4.683715 | 0.658495  | -0.600997                            |
| 6         | -3.069610 | 2.058332  | 0.294925                             |
| 6         | 4.420619  | 0.015311  | 1.633054                             |
| 6         | -4.573691 | -0.566852 | -0.849136                            |
| 12        | -1.023070 | 0.237703  | 0.492415                             |
| 6         | 5.102753  | 0.672960  | -0.895574                            |
| 6         | 3.272893  | -0.194305 | 0.838299                             |
| 6         | 1.997504  | -0.549028 | 0.668954                             |
| 8         | 5.666969  | 1.020162  | -1.889811                            |
| 6         | -3.432240 | -1.277883 | -0.597550                            |
| 6         | 0.781384  | -0.897890 | 0.497964                             |
| 6         | -2.256068 | -1.593820 | -0.262832                            |
| 16        |           |           |                                      |
| 96.264717 | Kcal/mol  | 4.174439  | eV -101.230273 H Child_12_20.log     |
| 8         | -3.611009 | 2.511640  | -0.208993                            |
| 6         | 8.357738  | -0.403199 | 0.568838                             |
| 12        | -5.244192 | -0.973198 | 1.021790                             |
| 6         | 7.092923  | -0.177925 | 0.413209                             |
| 6         | -3.035392 | 1.416664  | 0.007288                             |
| 6         | 5.816638  | 0.031900  | 0.254910                             |
| 6         | -3.751658 | 0.196568  | 0.339088                             |
| 6         | 4.570092  | 0.211326  | 0.108433                             |
| 6         | -1.585054 | 1.324486  | -0.043593                            |
| 6         | 3.291317  | 0.328107  | -0.056616                            |
| 6         | -3.411341 | -1.172384 | 0.156818                             |
| 6         | 2.034740  | 0.376400  | -0.229161                            |
| 6         | -0.403892 | 0.991135  | -0.218908                            |
| 6         | 0.743642  | 0.249370  | -0.456897                            |
| 8         | -2.345885 | -1.673076 | -0.454287                            |
| 12        | -0.644423 | -1.272068 | -1.001307                            |
| 16        |           |           |                                      |
| 96.444784 | Kcal/mol  | 4.182247  | eV -101.229986 H Original2D_0_25.log |
| 6         | -1.104828 | -0.091983 | -0.000000                            |
| 6         | -3.403487 | 1.160684  | -0.000000                            |
| 6         | 0.000000  | 1.055346  | -0.000000                            |
| 6         | -0.944839 | -1.404955 | 0.000000                             |
| 6         | 0.139128  | -2.220032 | 0.000000                             |
| 12        | 2.835100  | -1.565424 | 0.000000                             |
| 6         | 1.235059  | -2.855366 | 0.000000                             |
| 6         | -2.076392 | 1.018276  | -0.000000                            |

|                                                             |           |           |           |
|-------------------------------------------------------------|-----------|-----------|-----------|
| 6                                                           | 1.375337  | 0.867806  | -0.000000 |
| 6                                                           | -4.638533 | 0.832917  | -0.000000 |
| 6                                                           | -0.966545 | 2.029339  | -0.000000 |
| 6                                                           | 2.555691  | 0.463353  | 0.000000  |
| 8                                                           | -5.826614 | 0.667902  | -0.000000 |
| 6                                                           | 4.935903  | -2.603111 | 0.000000  |
| 12                                                          | -1.468819 | 4.078445  | -0.000000 |
| 8                                                           | 5.947321  | -3.126640 | 0.000000  |
| 16                                                          |           |           |           |
| 96.638045 Kcal/mol 4.190628 eV -101.229678 H Child_9_8.log  |           |           |           |
| 8                                                           | -6.788592 | -1.236374 | 0.096279  |
| 8                                                           | 7.534852  | -1.088790 | -0.049931 |
| 6                                                           | -5.586771 | -1.015068 | 0.055257  |
| 6                                                           | 6.362619  | -0.822810 | -0.001347 |
| 6                                                           | -4.349997 | -0.692980 | -0.003614 |
| 6                                                           | 5.114787  | -0.562603 | 0.042873  |
| 6                                                           | -3.034467 | -0.542589 | -0.058865 |
| 6                                                           | 1.437951  | 0.660993  | 0.059091  |
| 6                                                           | -2.387378 | 0.778197  | -0.102868 |
| 6                                                           | 2.626183  | 0.092323  | 0.040805  |
| 6                                                           | -0.984550 | 1.073528  | 0.001176  |
| 6                                                           | 3.863848  | -0.228145 | 0.057494  |
| 12                                                          | -1.133023 | -1.548767 | -0.065371 |
| 12                                                          | 0.456653  | 2.599988  | 0.054918  |
| 6                                                           | 0.077258  | 0.183941  | 0.019457  |
| 6                                                           | -2.781757 | 2.072990  | -0.150351 |
| 16                                                          |           |           |           |
| 96.847398 Kcal/mol 4.199706 eV -101.229344 H Child_4_20.log |           |           |           |
| 12                                                          | -1.211271 | 2.055442  | 0.607380  |
| 8                                                           | 4.336189  | -1.409791 | -0.162175 |
| 6                                                           | -3.100380 | 1.755854  | -0.038176 |
| 6                                                           | 0.715985  | -0.102835 | -0.390468 |
| 6                                                           | -3.181686 | 0.512233  | -0.225332 |
| 12                                                          | -0.987153 | -0.737622 | -1.546839 |
| 6                                                           | -1.555640 | -2.265543 | 1.096040  |
| 8                                                           | 2.446827  | 3.104542  | 0.082518  |
| 6                                                           | -2.882247 | -0.827473 | -0.490458 |
| 6                                                           | 0.691543  | 1.304551  | 0.115204  |
| 6                                                           | -2.514940 | -1.753207 | 0.388114  |
| 6                                                           | 1.653307  | 2.194999  | 0.079390  |
| 6                                                           | -0.257286 | -2.114353 | 1.069612  |
| 6                                                           | 3.176738  | -1.201166 | -0.140616 |
| 6                                                           | 1.888322  | -0.992520 | -0.056967 |
| 6                                                           | 0.719110  | -1.405847 | 0.578783  |
| 16                                                          |           |           |           |
| 97.396126 Kcal/mol 4.223501 eV -101.228470 H Child_6_9.log  |           |           |           |
| 6                                                           | 3.063612  | 1.934557  | 1.046251  |
| 6                                                           | -1.447074 | -0.651232 | -0.531160 |
| 6                                                           | 3.584402  | -1.778667 | 0.789401  |
| 6                                                           | -0.278859 | -0.245894 | -0.950630 |
| 6                                                           | 3.511487  | 0.698649  | 1.377877  |
| 6                                                           | -2.624109 | -0.717962 | -0.079358 |
| 6                                                           | 3.697199  | -0.517503 | 1.305537  |
| 6                                                           | 0.882735  | 0.170707  | -1.361339 |
| 6                                                           | 3.352020  | -2.782830 | 0.055025  |

|                                                              |           |           |           |
|--------------------------------------------------------------|-----------|-----------|-----------|
| 6                                                            | -3.891744 | -0.685147 | 0.245490  |
| 6                                                            | 2.499282  | 2.891679  | 0.483176  |
| 6                                                            | -5.088227 | 0.007759  | 0.231995  |
| 8                                                            | -4.718681 | -0.408895 | 1.555625  |
| 12                                                           | 1.361339  | 2.188613  | -1.064750 |
| 12                                                           | 2.090943  | -1.558675 | -1.088616 |
| 8                                                            | -5.905285 | 0.720899  | -0.284774 |
| 16                                                           |           |           |           |
| 97.442199 Kcal/mol 4.225499 eV -101.228396 H Child_11_22.log |           |           |           |
| 6                                                            | -1.300856 | 1.300996  | 0.532835  |
| 8                                                            | -4.461461 | -1.212023 | -0.994474 |
| 6                                                            | -1.843119 | 2.350050  | -0.005719 |
| 6                                                            | -3.452393 | -1.043047 | -0.404761 |
| 12                                                           | 0.760480  | 0.832045  | 1.021890  |
| 6                                                            | 1.454398  | -2.370572 | -0.096181 |
| 6                                                            | 2.330106  | 2.105107  | 0.242412  |
| 12                                                           | -0.522765 | -2.087601 | 0.488174  |
| 8                                                            | -2.144317 | 3.384916  | -0.513633 |
| 6                                                            | 2.554195  | -1.550938 | -0.350458 |
| 6                                                            | -1.301885 | -0.088574 | 0.594190  |
| 6                                                            | 3.560162  | -0.848473 | -1.018754 |
| 6                                                            | 1.724133  | -1.174893 | 0.728955  |
| 6                                                            | 3.661282  | 0.398954  | -0.995158 |
| 6                                                            | -2.293388 | -1.027064 | 0.202192  |
| 6                                                            | 3.239640  | 1.562375  | -0.438873 |
| 16                                                           |           |           |           |
| 97.614890 Kcal/mol 4.232988 eV -101.228121 H Child_9_57.log  |           |           |           |
| 12                                                           | 1.902187  | 1.180658  | -0.979436 |
| 12                                                           | -6.408466 | -2.280076 | 0.306620  |
| 6                                                            | 0.704583  | 2.720225  | -0.396758 |
| 6                                                            | -1.365726 | -1.611519 | -0.261923 |
| 6                                                            | 2.391350  | -0.914278 | -0.771906 |
| 6                                                            | -2.404453 | -1.036206 | 0.101339  |
| 8                                                            | 3.525712  | -1.330788 | -0.475818 |
| 6                                                            | -3.164421 | 0.032247  | 0.416481  |
| 6                                                            | 6.994293  | -1.222061 | 1.115303  |
| 6                                                            | -0.066899 | -1.790070 | -0.565610 |
| 6                                                            | -0.402791 | 3.220340  | -0.114953 |
| 6                                                            | -3.262350 | 1.254300  | 0.620063  |
| 6                                                            | -1.687671 | 3.135002  | 0.312813  |
| 6                                                            | 1.148550  | -1.632348 | -0.766301 |
| 6                                                            | -2.710321 | 2.483751  | 0.591949  |
| 8                                                            | 6.103098  | -0.499622 | 1.274669  |
| 16                                                           |           |           |           |
| 97.729990 Kcal/mol 4.237979 eV -101.227938 H Child_12_23.log |           |           |           |
| 8                                                            | -6.647655 | -0.749754 | 0.504469  |
| 8                                                            | 5.710118  | -0.139068 | 0.160199  |
| 6                                                            | -1.191174 | 1.133813  | -0.713623 |
| 6                                                            | 4.484120  | -0.199925 | 0.143107  |
| 6                                                            | -1.782071 | -0.069857 | -0.600900 |
| 6                                                            | 2.407832  | -2.030760 | 0.380845  |
| 6                                                            | -1.761698 | -1.305421 | -0.440320 |
| 6                                                            | 3.269636  | -0.964137 | 0.258645  |
| 6                                                            | -7.275854 | -1.471484 | -0.131653 |
| 6                                                            | 1.361961  | -2.689205 | 0.359977  |

|                                                              |           |           |           |
|--------------------------------------------------------------|-----------|-----------|-----------|
| 6                                                            | -0.427069 | 2.140386  | -0.587208 |
| 6                                                            | -1.064518 | -2.414578 | -0.139795 |
| 6                                                            | 0.042320  | -2.890446 | 0.173683  |
| 6                                                            | 3.187666  | 0.410356  | -0.035040 |
| 12                                                           | 1.589797  | 1.688496  | -0.453331 |
| 12                                                           | -1.590348 | 4.079681  | 0.676359  |
| 16                                                           |           |           |           |
| 97.981596 Kcal/mol 4.248890 eV -101.227537 H Child_10_47.log |           |           |           |
| 8                                                            | -3.413278 | 1.226827  | 0.247823  |
| 6                                                            | 4.052792  | 0.656457  | 0.023018  |
| 6                                                            | -2.151274 | 1.544300  | 0.062674  |
| 6                                                            | 3.591164  | -0.500566 | 0.097985  |
| 8                                                            | -5.143925 | -0.239349 | 0.277331  |
| 6                                                            | -3.965999 | -0.114274 | 0.098730  |
| 6                                                            | 3.039965  | -1.761522 | 0.188669  |
| 6                                                            | -1.022180 | 2.016478  | -0.053957 |
| 6                                                            | 3.169085  | -3.191722 | 0.379887  |
| 6                                                            | -2.972495 | -1.085134 | -0.205682 |
| 12                                                           | 3.228505  | 2.491729  | -0.034863 |
| 6                                                            | -2.010256 | -1.832906 | -0.409494 |
| 6                                                            | 1.898484  | -2.526399 | 0.130465  |
| 6                                                            | 0.226064  | 2.558047  | -0.130002 |
| 6                                                            | 1.322110  | 3.112985  | -0.167702 |
| 12                                                           | -0.112433 | -2.587920 | -0.322535 |
| 16                                                           |           |           |           |
| 98.577399 Kcal/mol 4.274726 eV -101.226587 H MutD_11_64.log  |           |           |           |
| 6                                                            | 11.381728 | -2.113682 | -0.451167 |
| 6                                                            | -3.097499 | 0.499671  | -0.761828 |
| 6                                                            | -4.809100 | -1.389171 | -0.610803 |
| 6                                                            | -4.085230 | -0.239626 | -0.849979 |
| 8                                                            | 0.958779  | 3.482329  | -0.367560 |
| 6                                                            | 1.271595  | 0.296167  | 1.371176  |
| 6                                                            | -1.774373 | 0.783862  | -0.296013 |
| 6                                                            | -4.423457 | -2.516671 | 0.125706  |
| 6                                                            | 0.117208  | 0.004762  | 0.973157  |
| 6                                                            | -1.178914 | -0.230749 | 0.484611  |
| 8                                                            | 10.258469 | -1.877376 | -0.518443 |
| 6                                                            | -5.749730 | -2.483401 | -0.497677 |
| 6                                                            | -1.073863 | 1.987474  | -0.569325 |
| 12                                                           | 1.803188  | 2.116802  | 0.710445  |
| 6                                                            | -0.142852 | 2.789829  | -0.533960 |
| 12                                                           | -2.499110 | -1.881003 | 0.688274  |
| 16                                                           |           |           |           |
| 98.651888 Kcal/mol 4.277956 eV -101.226469 H Child_15_18.log |           |           |           |
| 6                                                            | -1.663250 | 0.090192  | -0.462790 |
| 6                                                            | 3.425970  | -1.846171 | 0.025365  |
| 6                                                            | -0.732838 | 1.095310  | -0.500736 |
| 6                                                            | 2.311614  | -1.043370 | -0.446878 |
| 6                                                            | 0.227702  | 1.877095  | -0.571510 |
| 6                                                            | 3.449727  | -0.413327 | 0.046313  |
| 6                                                            | -2.927898 | -0.095018 | -0.244108 |
| 12                                                           | 0.230172  | -0.957191 | -0.644561 |
| 12                                                           | 2.215361  | 2.261610  | -0.251226 |
| 6                                                            | -7.961022 | -0.008631 | 0.762960  |
| 6                                                            | -4.175785 | -0.309504 | 0.007453  |



|           |           |           |                                  |
|-----------|-----------|-----------|----------------------------------|
| 6         | -6.722039 | -0.265881 | 0.466266                         |
| 6         | 3.806973  | 0.976356  | 0.453111                         |
| 6         | -5.409236 | -0.312820 | 0.234867                         |
| 8         | 4.737228  | 1.199286  | 1.242451                         |
| 8         | 3.872034  | -2.964087 | 0.273496                         |
| 16        |           |           |                                  |
| 98.800247 | Kcal/mol  | 4.284390  | eV -101.226232 H Child_3_8.log   |
| 12        | 4.945743  | -1.926466 | 0.051060                         |
| 12        | -2.724583 | 1.290031  | 0.065343                         |
| 6         | 3.725867  | -0.168003 | 0.021159                         |
| 8         | 1.551909  | 3.920460  | -0.132575                        |
| 6         | 2.400117  | -0.243337 | 0.031541                         |
| 6         | -4.464171 | 0.214698  | 0.121737                         |
| 6         | 1.046890  | -0.864332 | 0.037350                         |
| 6         | 1.031477  | 2.866802  | -0.049582                        |
| 6         | 0.159578  | -1.898225 | -0.050591                        |
| 6         | -4.126402 | -0.991537 | 0.026919                         |
| 6         | -0.892461 | -2.548151 | -0.094325                        |
| 8         | -0.976559 | 1.702281  | 0.021203                         |
| 6         | 0.389037  | 1.684799  | 0.013921                         |
| 6         | -2.240616 | -2.641219 | -0.116859                        |
| 6         | -3.363656 | -2.118615 | -0.078064                        |
| 6         | 1.124888  | 0.483001  | 0.052485                         |
| 16        |           |           |                                  |
| 99.502677 | Kcal/mol  | 4.314850  | eV -101.225113 H Child_10_26.log |
| 6         | 3.442989  | 1.838026  | -0.018877                        |
| 6         | -4.119786 | -1.824514 | 0.524344                         |
| 6         | 3.885124  | 0.445558  | 0.105927                         |
| 6         | -3.969039 | -0.577287 | 0.391249                         |
| 6         | 4.826339  | -0.445930 | 0.226679                         |
| 12        | -1.950515 | -2.021794 | -0.195138                        |
| 8         | 5.657789  | -1.280406 | 0.332563                         |
| 6         | -3.123895 | 0.484587  | 0.067349                         |
| 6         | 2.477511  | 0.791539  | -0.091776                        |
| 6         | -3.021352 | 1.846705  | 0.325089                         |
| 6         | 1.216197  | 0.341617  | -0.257319                        |
| 8         | -2.002706 | 0.021022  | -0.536015                        |
| 6         | 0.754841  | -0.979745 | -0.174426                        |
| 6         | -2.291587 | 2.877154  | 0.418293                         |
| 12        | -0.565111 | 1.480657  | -0.358689                        |
| 6         | 0.080467  | -2.036259 | -0.137610                        |
| 16        |           |           |                                  |
| 99.764443 | Kcal/mol  | 4.326201  | eV -101.224696 H Child_2_50.log  |
| 6         | 3.896339  | 4.351266  | -1.681846                        |
| 12        | -8.204523 | 1.586931  | -0.310128                        |
| 8         | 3.695115  | 3.844829  | -0.666241                        |
| 6         | -1.037162 | -2.906238 | -0.351320                        |
| 6         | 1.951923  | 1.177772  | 0.747031                         |
| 8         | -0.442736 | -4.048079 | -0.483431                        |
| 6         | 2.821613  | -1.195443 | 0.357321                         |
| 6         | -1.446792 | -1.761318 | -0.153904                        |
| 6         | 2.561985  | 0.114291  | 0.606520                         |
| 6         | -1.487985 | -0.426700 | 0.044363                         |
| 6         | 0.883821  | 2.041817  | 0.817164                         |
| 12        | 1.416993  | -3.824527 | -0.147777                        |

|                                                               |           |           |           |
|---------------------------------------------------------------|-----------|-----------|-----------|
| 6                                                             | 2.809922  | -2.413163 | 0.094065  |
| 6                                                             | -1.232845 | 0.761061  | 0.278250  |
| 6                                                             | -0.015275 | 3.158880  | 1.073508  |
| 6                                                             | -0.466988 | 1.843964  | 0.617553  |
| 16                                                            |           |           |           |
| 100.486028 Kcal/mol 4.357492 eV -101.223546 H Child_11_32.log |           |           |           |
| 6                                                             | 0.457350  | -2.116773 | -0.185870 |
| 6                                                             | 2.113447  | 1.936167  | -0.455380 |
| 6                                                             | 1.786823  | -2.119958 | 0.046791  |
| 6                                                             | 3.424837  | 1.703276  | -0.213176 |
| 6                                                             | -2.123419 | -1.944080 | -0.497749 |
| 6                                                             | 4.576881  | 1.363710  | 0.122330  |
| 8                                                             | -3.592146 | 1.440803  | 1.255955  |
| 6                                                             | 0.886867  | 1.871326  | -0.544071 |
| 6                                                             | -0.764826 | -2.002954 | -0.373264 |
| 6                                                             | -0.449245 | 1.758075  | -0.488198 |
| 6                                                             | -3.358177 | -1.912495 | -0.521147 |
| 6                                                             | -1.648006 | 1.539158  | -0.365094 |
| 6                                                             | 3.003420  | -2.028681 | 0.283973  |
| 12                                                            | 4.455990  | -0.628170 | 0.555859  |
| 8                                                             | -2.894376 | 1.278114  | -0.274662 |
| 12                                                            | -4.084617 | -0.207828 | 0.385373  |
| 16                                                            |           |           |           |
| 100.886830 Kcal/mol 4.374873 eV -101.222907 H MutD_11_72.log  |           |           |           |
| 6                                                             | 0.812060  | 2.789183  | 1.059830  |
| 6                                                             | -2.664103 | -0.988416 | 1.029263  |
| 6                                                             | -0.398872 | 1.123616  | 2.629271  |
| 6                                                             | -1.645447 | 0.700304  | -1.880964 |
| 12                                                            | 0.575482  | 2.586258  | -0.970691 |
| 6                                                             | 6.058034  | -2.873184 | -0.438442 |
| 6                                                             | 0.300122  | 2.082262  | 1.962221  |
| 12                                                            | -4.745193 | -2.927254 | -0.844638 |
| 6                                                             | -2.439237 | -0.213062 | -1.277862 |
| 6                                                             | 2.634727  | 1.455074  | -1.166360 |
| 6                                                             | -1.200216 | 0.189443  | 2.663141  |
| 8                                                             | 3.497171  | 0.738595  | -0.981015 |
| 6                                                             | -2.860584 | -0.921282 | -0.329636 |
| 6                                                             | -2.098537 | -0.631645 | 2.071005  |
| 6                                                             | -0.793159 | 1.591656  | -2.126546 |
| 8                                                             | 5.978804  | -3.455060 | 0.557820  |
| 16                                                            |           |           |           |
| 101.020676 Kcal/mol 4.380677 eV -101.222694 H Child_4_30.log  |           |           |           |
| 6                                                             | 4.521114  | -1.827340 | 0.048727  |
| 6                                                             | -2.511142 | 0.916718  | -0.019611 |
| 6                                                             | 4.701498  | -0.556806 | 0.022884  |
| 6                                                             | -4.025932 | 0.421605  | 0.025804  |
| 12                                                            | 2.414949  | -1.624762 | -0.006566 |
| 8                                                             | -5.061860 | 1.020674  | 0.075566  |
| 6                                                             | 4.837392  | 0.794770  | 0.042565  |
| 6                                                             | -1.568385 | 1.805934  | -0.029782 |
| 6                                                             | 3.674658  | 1.503466  | 0.007229  |
| 6                                                             | -2.130662 | -0.502890 | -0.041895 |
| 6                                                             | 0.454159  | -0.993954 | -0.057989 |
| 6                                                             | -3.476116 | -1.033155 | 0.000721  |
| 6                                                             | 2.526269  | 2.024839  | 0.006439  |

|                                                               |           |           |           |
|---------------------------------------------------------------|-----------|-----------|-----------|
| 8                                                             | -4.006297 | -2.135440 | 0.018646  |
| 6                                                             | -0.794153 | -0.905782 | -0.056103 |
| 12                                                            | 0.526139  | 1.544238  | -0.030737 |
| 16                                                            |           |           |           |
| 101.055898 Kcal/mol 4.382204 eV -101.222638 H Child_9_26.log  |           |           |           |
| 6                                                             | 3.165996  | -2.228567 | 0.057640  |
| 12                                                            | -2.257464 | 1.634829  | -0.063303 |
| 6                                                             | 1.927486  | -2.369119 | 0.048360  |
| 6                                                             | -0.399032 | 2.364675  | -0.043837 |
| 12                                                            | 4.449309  | -0.703219 | 0.067941  |
| 6                                                             | 0.843049  | 2.354826  | -0.004946 |
| 6                                                             | 0.581196  | -2.459541 | -0.042396 |
| 6                                                             | 2.193968  | 2.171125  | -0.003736 |
| 6                                                             | -0.639163 | -2.251803 | -0.079726 |
| 6                                                             | -3.656899 | 0.117348  | -0.083407 |
| 8                                                             | 4.512004  | 1.172143  | 0.015572  |
| 8                                                             | -5.059314 | -0.039925 | 0.105490  |
| 6                                                             | -1.871761 | -1.737029 | -0.154574 |
| 6                                                             | 3.351834  | 1.762751  | 0.004598  |
| 6                                                             | -2.905610 | -1.035952 | -0.110556 |
| 6                                                             | -6.245007 | -0.061558 | 0.241888  |
| 16                                                            |           |           |           |
| 101.164310 Kcal/mol 4.386905 eV -101.222465 H Child_8_59.log  |           |           |           |
| 8                                                             | -4.351090 | -1.196115 | 0.243235  |
| 6                                                             | 2.170651  | 1.756052  | -1.442296 |
| 6                                                             | -3.710994 | 1.204511  | 0.525153  |
| 12                                                            | 3.406206  | -1.400373 | 0.351306  |
| 6                                                             | -4.210640 | 0.070826  | 0.434878  |
| 6                                                             | 2.424040  | 1.386257  | -0.164142 |
| 12                                                            | -2.396497 | -1.443005 | -0.201855 |
| 8                                                             | 1.730495  | -1.651499 | -0.534186 |
| 6                                                             | -2.510742 | 1.823857  | 0.369764  |
| 6                                                             | 3.349778  | 0.883188  | 0.756547  |
| 6                                                             | -1.300674 | 1.776245  | 0.099798  |
| 6                                                             | 4.124199  | 0.168626  | 1.462541  |
| 6                                                             | -0.560655 | -0.552809 | -0.430951 |
| 6                                                             | 0.880807  | -0.678497 | -0.629069 |
| 6                                                             | -0.322265 | 0.863254  | -0.283831 |
| 6                                                             | 1.141200  | 0.782064  | -0.609358 |
| 16                                                            |           |           |           |
| 101.535409 Kcal/mol 4.402998 eV -101.221874 H Child_12_53.log |           |           |           |
| 6                                                             | 3.560642  | -1.786769 | 1.067628  |
| 6                                                             | -0.994394 | 2.862842  | 0.089518  |
| 12                                                            | 4.037603  | 0.018625  | 0.247505  |
| 6                                                             | -1.721300 | 1.871563  | 0.278806  |
| 6                                                             | 2.358590  | -1.838654 | 0.711708  |
| 6                                                             | -2.428264 | 0.681064  | 0.388674  |
| 6                                                             | 1.220255  | -1.220194 | 0.039781  |
| 12                                                            | 0.924936  | 2.708903  | -0.475217 |
| 6                                                             | -0.044557 | -1.515413 | -0.222873 |
| 6                                                             | -3.554461 | -0.221029 | 0.597358  |
| 6                                                             | 2.299106  | 1.165662  | -0.531699 |
| 8                                                             | -4.711165 | -0.407108 | 0.940509  |
| 6                                                             | -1.344602 | -1.520444 | -0.659137 |
| 6                                                             | -2.286475 | -0.647853 | 0.086957  |

|                                                               |           |           |           |
|---------------------------------------------------------------|-----------|-----------|-----------|
| 6                                                             | 1.667223  | 0.071194  | -0.374573 |
| 8                                                             | -1.781465 | -2.110662 | -1.703054 |
| 16                                                            |           |           |           |
| 101.622325 Kcal/mol 4.406767 eV -101.221735 H MutD_14_68.log  |           |           |           |
| 6                                                             | 2.040324  | -0.555410 | 0.044584  |
| 8                                                             | 2.635962  | 2.782281  | 0.426953  |
| 6                                                             | -3.013994 | 0.229450  | -0.098790 |
| 6                                                             | 3.123769  | -1.180732 | -0.257265 |
| 6                                                             | 4.273428  | -1.789887 | -0.529894 |
| 12                                                            | 0.201272  | -1.467263 | 0.405432  |
| 6                                                             | -2.818059 | -1.076164 | 0.454827  |
| 6                                                             | -0.683280 | 1.434049  | -0.484488 |
| 6                                                             | -4.247434 | 0.614217  | -0.446315 |
| 12                                                            | 1.343072  | 1.315266  | -0.416338 |
| 6                                                             | -3.174116 | -2.355458 | 0.991601  |
| 6                                                             | -1.787947 | -1.925090 | 0.765591  |
| 6                                                             | -1.827099 | 0.999399  | -0.351100 |
| 6                                                             | 5.393971  | -2.349722 | -0.818906 |
| 8                                                             | -5.335713 | 0.886192  | -0.778311 |
| 6                                                             | 3.231418  | 3.368046  | 1.220444  |
| 16                                                            |           |           |           |
| 101.781684 Kcal/mol 4.413677 eV -101.221481 H Child_11_28.log |           |           |           |
| 6                                                             | -0.231700 | 2.130145  | -0.535199 |
| 6                                                             | 0.215810  | -1.981535 | -0.027573 |
| 6                                                             | -1.436067 | 2.378272  | -0.648537 |
| 12                                                            | -1.774476 | -1.870851 | 0.464731  |
| 6                                                             | -2.740467 | 2.067266  | -0.491283 |
| 6                                                             | 1.302908  | -2.488560 | -0.561289 |
| 6                                                             | 1.018777  | 1.642745  | -0.212920 |
| 8                                                             | 2.215721  | -3.029426 | -1.114235 |
| 6                                                             | -3.622668 | 1.281238  | -0.116644 |
| 6                                                             | -3.718356 | -1.225623 | 0.536304  |
| 12                                                            | 3.045315  | 2.108850  | 0.158146  |
| 6                                                             | 2.518908  | -0.056944 | 0.630817  |
| 6                                                             | -3.870953 | -0.025153 | 0.203458  |
| 6                                                             | 1.188570  | 0.337970  | 0.218096  |
| 6                                                             | 3.730681  | 0.226715  | 0.802005  |
| 8                                                             | 0.111439  | -0.542473 | 0.331994  |
| 16                                                            |           |           |           |
| 102.138546 Kcal/mol 4.429152 eV -101.220912 H MutD_12_70.log  |           |           |           |
| 6                                                             | 1.486451  | 3.441313  | 0.113448  |
| 6                                                             | -4.444250 | -2.414280 | 0.179393  |
| 6                                                             | 2.014577  | 1.603221  | 1.662502  |
| 8                                                             | -5.228696 | -3.231200 | 0.522663  |
| 6                                                             | 0.146730  | -0.060466 | 1.077291  |
| 6                                                             | -3.741891 | 0.690969  | -1.713596 |
| 6                                                             | -2.423819 | 0.615006  | -1.044772 |
| 8                                                             | 9.521166  | -2.278048 | -0.307285 |
| 6                                                             | 0.535112  | 3.475819  | -0.713848 |
| 12                                                            | -0.694728 | 1.766720  | -0.804243 |
| 6                                                             | -3.368234 | -0.386302 | -0.828329 |
| 6                                                             | 8.867222  | -2.744278 | -1.129722 |
| 6                                                             | -3.482856 | -1.557214 | -0.063368 |
| 6                                                             | 1.148526  | 0.562735  | 1.499082  |
| 6                                                             | 2.097950  | 2.685385  | 1.056148  |

|                                                              |           |           |           |
|--------------------------------------------------------------|-----------|-----------|-----------|
| 12                                                           | -1.584677 | -1.049843 | 0.613543  |
| 16                                                           |           |           |           |
| 102.532923 Kcal/mol 4.446254 eV -101.220284 H MutD_15_64.log |           |           |           |
| 6                                                            | -1.062896 | -0.996532 | -0.220619 |
| 12                                                           | -0.774156 | 1.080387  | -0.386490 |
| 8                                                            | -2.766244 | 1.847966  | -0.506140 |
| 6                                                            | -4.555990 | -1.909972 | 1.208713  |
| 6                                                            | 2.143744  | 0.815574  | 3.925880  |
| 8                                                            | 2.582512  | 1.392580  | 3.032488  |
| 6                                                            | -2.227943 | -1.302578 | 0.217135  |
| 6                                                            | 1.711381  | 1.874844  | -1.368554 |
| 6                                                            | 2.672639  | 0.915644  | -1.485477 |
| 12                                                           | 0.541519  | -2.292985 | -0.338170 |
| 6                                                            | 2.969092  | -1.549623 | -1.032838 |
| 6                                                            | -3.430273 | -1.594118 | 0.684176  |
| 6                                                            | -3.782322 | 2.319514  | -0.794686 |
| 6                                                            | 2.548452  | -2.651985 | -0.601298 |
| 6                                                            | 0.624932  | 2.422391  | -1.070952 |
| 6                                                            | 3.099434  | -0.238692 | -1.380624 |
| 16                                                           |           |           |           |
| 102.570953 Kcal/mol 4.447903 eV -101.220223 H Child_7_34.log |           |           |           |
| 8                                                            | -5.939003 | 0.174449  | -1.018281 |
| 12                                                           | 3.565184  | 1.535212  | -0.530141 |
| 6                                                            | -4.846851 | 0.245466  | -0.539168 |
| 8                                                            | 2.056554  | 1.683919  | 0.564437  |
| 12                                                           | -2.082800 | -1.299145 | -0.001549 |
| 6                                                            | 4.227904  | -0.130658 | -1.473317 |
| 6                                                            | 1.176319  | 0.727768  | 0.739811  |
| 6                                                            | -3.637307 | 0.174651  | -0.082278 |
| 6                                                            | 3.439115  | -0.913775 | -0.894492 |
| 6                                                            | 2.400764  | -2.459164 | 0.905168  |
| 6                                                            | -0.175956 | 0.571379  | 0.955606  |
| 6                                                            | 1.287910  | -0.789821 | 0.334029  |
| 6                                                            | -1.442411 | 1.165361  | 0.839933  |
| 6                                                            | -0.068759 | -0.925030 | 0.479331  |
| 6                                                            | 2.465961  | -1.555382 | -0.088483 |
| 6                                                            | -2.614859 | 0.939246  | 0.492363  |
| 16                                                           |           |           |           |
| 102.928572 Kcal/mol 4.463411 eV -101.219653 H MutD_11_74.log |           |           |           |
| 6                                                            | -2.299451 | -1.196537 | -0.191445 |
| 12                                                           | -2.815251 | 1.338189  | -0.091540 |
| 6                                                            | 2.761728  | -0.764855 | -0.088923 |
| 6                                                            | 4.162854  | -1.242376 | 0.101054  |
| 6                                                            | 1.478765  | -1.274013 | -0.217977 |
| 6                                                            | 4.775042  | -2.420555 | 0.248495  |
| 6                                                            | -1.284226 | 2.632992  | -0.019484 |
| 6                                                            | -3.560090 | -0.630524 | -0.052021 |
| 6                                                            | 3.208884  | 0.543842  | -0.018493 |
| 6                                                            | 0.262320  | -1.443295 | -0.289774 |
| 8                                                            | -5.926751 | -1.261005 | 0.356752  |
| 6                                                            | -1.087802 | -1.417618 | -0.278221 |
| 6                                                            | -0.035883 | 2.770514  | 0.028909  |
| 6                                                            | -4.777295 | -1.032998 | 0.155072  |
| 8                                                            | 4.620574  | 0.136460  | 0.155248  |
| 12                                                           | 1.883613  | 2.149220  | 0.061612  |

```

16
103.246159 Kcal/mol 4.477183 eV -101.219147 H Child_6_32.log
8   -6.499971  0.136047  -0.095999
6    5.969686  -1.590402  0.037808
6   -5.326070  -0.096437  -0.067576
6    4.793345  -1.098632  -0.014724
6   -4.078450  -0.337852  -0.027461
6    3.556394  -0.582003  -0.100615
6   -2.813490  -0.591046  -0.019020
6    2.695052  0.543753  -0.310708
6   -1.572051  -0.940559  0.026526
6    2.152812  -0.732619  -0.018816
8    0.957496  4.717633  0.464315
12   0.805808  1.373773  -0.420868
6    0.809710  3.643644  0.114568
6    0.862762  -1.298917  0.105298
12   -0.512324  -2.837101  0.336875
6   -0.246702  -0.463847  -0.048384
16
103.587025 Kcal/mol 4.491964 eV -101.218604 H Original3D_10_6.log
6    3.825587  2.245646  0.055362
6    3.551151  -0.213690  -0.510427
6    4.247149  0.953874  -0.315303
6    2.605731  -1.017096  -0.594478
6    1.195225  -1.049929  -0.295477
6   -0.631353  -2.927881  -0.494137
6    0.347171  -2.204139  -0.456010
8   -1.810214  -3.480352  -0.324036
8   -6.139232  2.510720  -0.590920
12   1.816221  1.864508  0.482512
6    0.640191  0.122736  0.253261
12   -2.417557  -1.868924  0.612908
6   -6.769507  3.472160  -0.560063
6    5.253745  2.006000  -0.148501
6   -1.786194  -0.099155  1.329773
6   -0.676962  0.013151  0.765099
16
103.707782 Kcal/mol 4.497201 eV -101.218412 H MutD_16_70.log
6    4.032929  -0.204333  0.109421
6    3.563713  1.249541  0.344859
6   -0.353284  -1.109969  -0.689790
6    1.297936  2.300284  -0.203803
6    3.220781  -1.220983  -0.280624
6    2.132085  -1.757630  -0.562777
12   -2.301135  -2.151302  0.637223
6    0.061470  2.148998  -0.383729
6    2.567514  2.012814  0.077792
6    4.762136  0.599927  0.951854
8   -4.843048  1.604932  -0.022186
8   -2.827146  -0.421808  0.624349
6   -0.441841  -2.483097  -0.263579
12   -1.553903  0.762659  -0.223109
6   -3.698677  1.574706  -0.146355
6    0.792237  -1.910471  -0.584382
16

```

103.792568 Kcal/mol 4.500877 eV -101.218276 H Child\_2\_36.log

|    |           |           |           |
|----|-----------|-----------|-----------|
| 6  | 1.731576  | -2.821749 | -0.306564 |
| 6  | -4.893800 | 0.479568  | 0.586516  |
| 6  | 0.617707  | -2.308377 | -0.057213 |
| 6  | -3.695633 | 0.268305  | 0.111255  |
| 12 | 3.203016  | -1.437576 | -0.047023 |
| 6  | -2.382866 | 0.116097  | -0.056004 |
| 6  | -0.335035 | -1.291296 | 0.247654  |
| 6  | 2.617050  | 1.958368  | -0.126311 |
| 6  | 0.271525  | -0.187314 | 0.811699  |
| 12 | -0.919842 | 1.667505  | -0.009291 |
| 6  | 1.507305  | 0.210945  | 0.971445  |
| 8  | 0.409897  | 3.011551  | -0.627627 |
| 6  | -1.735456 | -1.235999 | -0.198335 |
| 6  | 1.604731  | 2.626304  | -0.418427 |
| 8  | -2.296521 | -2.190543 | -0.763222 |
| 6  | 2.642048  | 0.630614  | 0.401378  |

16

104.246767 Kcal/mol 4.520573 eV -101.217553 H MutI\_9\_77.log

|    |           |           |           |
|----|-----------|-----------|-----------|
| 6  | -4.159944 | 0.671888  | 0.171202  |
| 6  | 8.847894  | -0.413988 | -0.188065 |
| 6  | -3.716169 | 1.789718  | -0.120811 |
| 12 | -0.098787 | -3.064930 | -0.170139 |
| 6  | 1.823178  | -0.594139 | 0.673018  |
| 6  | -3.040989 | -2.864012 | -0.179701 |
| 6  | -2.046286 | -3.578981 | -0.426130 |
| 6  | -1.663207 | 3.202391  | -0.413737 |
| 6  | -3.914465 | -1.848275 | 0.033407  |
| 6  | 2.222454  | 0.637936  | 1.024158  |
| 8  | -0.418460 | 3.469957  | -0.254756 |
| 8  | 7.832057  | 0.011345  | -0.487430 |
| 6  | -2.819880 | 2.753411  | -0.387418 |
| 6  | -4.268031 | -0.669955 | 0.178044  |
| 6  | 1.400076  | -1.788445 | 0.406298  |
| 12 | 0.824074  | 2.095287  | 0.279797  |

16

104.335274 Kcal/mol 4.524411 eV -101.217412 H Child\_5\_53.log

|    |           |           |           |
|----|-----------|-----------|-----------|
| 6  | 3.973142  | 1.478614  | 0.024404  |
| 8  | -2.434152 | -2.482490 | -0.074520 |
| 12 | 1.791329  | 1.698531  | -0.157733 |
| 12 | -2.643862 | -0.441894 | 0.112405  |
| 6  | 4.018615  | 0.218464  | 0.119151  |
| 6  | -1.193720 | -2.595256 | -0.115749 |
| 8  | -1.532009 | 2.566174  | -0.030704 |
| 6  | 0.063283  | -2.580054 | -0.112401 |
| 6  | -3.813897 | 1.315500  | 0.142018  |
| 6  | -0.408099 | 1.780682  | -0.065860 |
| 6  | 1.053823  | -1.627512 | -0.026123 |
| 6  | -2.745566 | 1.964186  | 0.052892  |
| 6  | 3.464040  | -1.013701 | 0.172006  |
| 6  | 0.715408  | -0.178197 | -0.092536 |
| 6  | -0.579328 | 0.343883  | 0.006517  |
| 6  | 2.445578  | -1.731462 | 0.126638  |

16

104.658712 Kcal/mol 4.538437 eV -101.216896 H MutD\_10\_76.log

|                                                              |           |           |           |
|--------------------------------------------------------------|-----------|-----------|-----------|
| 6                                                            | -0.724895 | -2.719369 | -0.003709 |
| 6                                                            | -1.910633 | -2.396760 | -0.075562 |
| 8                                                            | -3.113151 | 3.293861  | 0.154933  |
| 12                                                           | 2.351753  | 1.851668  | -0.134849 |
| 6                                                            | 0.625447  | 0.645900  | 0.014284  |
| 6                                                            | -2.886939 | -1.430282 | -0.105381 |
| 6                                                            | -4.192122 | -0.769228 | -0.139938 |
| 6                                                            | -2.930455 | -0.072208 | -0.071637 |
| 6                                                            | -2.560709 | 2.262230  | 0.093203  |
| 6                                                            | 3.785832  | -0.876164 | 0.096763  |
| 8                                                            | 0.537680  | -2.884357 | 0.071052  |
| 6                                                            | -0.607652 | 0.839450  | 0.020207  |
| 6                                                            | -2.021309 | 1.035719  | 0.014171  |
| 6                                                            | 4.152780  | 0.370203  | -0.012470 |
| 12                                                           | 1.730090  | -1.397868 | 0.123454  |
| 6                                                            | 4.540932  | 1.656905  | -0.108454 |
| 16                                                           |           |           |           |
| 104.692617 Kcal/mol 4.539907 eV -101.216842 H MutI_18_35.log |           |           |           |
| 6                                                            | 1.814014  | 1.436404  | -0.810605 |
| 6                                                            | 2.156262  | -1.134203 | 1.083786  |
| 12                                                           | 4.468151  | 0.765475  | 0.789710  |
| 6                                                            | 3.262839  | -0.716797 | 1.474795  |
| 6                                                            | 4.235599  | 2.330886  | -0.536118 |
| 6                                                            | 0.982340  | -1.520064 | 0.464600  |
| 6                                                            | -0.822481 | -1.243891 | -1.068888 |
| 6                                                            | -5.977570 | 0.947661  | 1.606105  |
| 6                                                            | 3.003760  | 2.096635  | -0.666984 |
| 6                                                            | -4.037779 | 0.311053  | -1.238829 |
| 6                                                            | 0.962382  | 0.546936  | -0.825120 |
| 6                                                            | 0.402796  | -0.723543 | -0.541316 |
| 8                                                            | -3.346945 | 1.092239  | -1.714748 |
| 8                                                            | -5.721552 | 2.061595  | 1.790026  |
| 12                                                           | -0.550349 | -2.976881 | 0.316581  |
| 6                                                            | -1.726436 | -2.113377 | -1.254380 |
| 16                                                           |           |           |           |
| 104.970539 Kcal/mol 4.551959 eV -101.216399 H MutI_15_57.log |           |           |           |
| 6                                                            | -6.023259 | 0.950453  | -0.366854 |
| 6                                                            | 5.355248  | 1.532512  | -0.143767 |
| 6                                                            | 0.934923  | -2.093974 | -0.007184 |
| 12                                                           | 1.067210  | 0.290673  | 0.406301  |
| 6                                                            | -1.493060 | -1.058751 | 0.141581  |
| 8                                                            | 6.275837  | 2.267775  | -0.365007 |
| 6                                                            | -7.271502 | 0.683851  | -0.588312 |
| 6                                                            | -1.173993 | 0.397238  | 0.391901  |
| 6                                                            | -4.771278 | 1.099436  | -0.067928 |
| 6                                                            | 3.320577  | -0.056431 | 0.064976  |
| 6                                                            | -3.536612 | 1.288294  | 0.232163  |
| 6                                                            | -0.269342 | -1.798993 | 0.034744  |
| 6                                                            | 4.323225  | 0.770738  | 0.047552  |
| 8                                                            | -2.625923 | -1.516793 | 0.033687  |
| 12                                                           | 2.949592  | -2.189634 | -0.276591 |
| 6                                                            | -2.295083 | 1.082238  | 0.443469  |
| 16                                                           |           |           |           |
| 105.095360 Kcal/mol 4.557372 eV -101.216200 H Child_5_9.log  |           |           |           |
| 6                                                            | -3.667853 | -0.580900 | -0.428018 |



|            |           |           |                                  |
|------------|-----------|-----------|----------------------------------|
| 12         | 3.133711  | 1.437266  | -1.491428                        |
| 6          | -2.677470 | -1.408089 | -0.187700                        |
| 8          | 2.458801  | -0.211189 | -0.775950                        |
| 6          | -4.367109 | 0.483540  | -0.427276                        |
| 12         | 2.502195  | 3.296569  | 0.548551                         |
| 6          | -1.633754 | -2.059259 | 0.069507                         |
| 8          | 1.539239  | -4.091536 | 0.258689                         |
| 6          | -4.951597 | 1.649565  | -0.279067                        |
| 6          | 1.379586  | 0.755348  | 1.027973                         |
| 6          | -5.174870 | 2.846080  | 0.163837                         |
| 6          | 1.609218  | -0.382434 | 0.212262                         |
| 6          | 0.929227  | -3.029057 | 0.224228                         |
| 6          | 1.324927  | 1.889837  | 1.549288                         |
| 6          | -0.322982 | -2.287408 | 0.300392                         |
| 6          | 0.950146  | -1.607928 | 0.350012                         |
| 16         |           |           |                                  |
| 105.322078 | Kcal/mol  | 4.567203  | eV -101.215839 H Child_6_59.log  |
| 6          | -2.829764 | -1.057520 | -0.541077                        |
| 12         | 3.180691  | -1.167344 | -0.495722                        |
| 6          | -2.812125 | 0.172221  | -0.315550                        |
| 8          | 3.645421  | 2.973895  | 0.682936                         |
| 6          | -2.390453 | 1.511915  | -0.055118                        |
| 6          | 2.691479  | 0.800885  | -0.060228                        |
| 12         | -0.887155 | -1.784663 | -0.523262                        |
| 6          | 3.134385  | 1.957739  | 0.324682                         |
| 6          | -3.196802 | 2.580125  | 0.162011                         |
| 6          | 1.086627  | -1.106448 | -0.518565                        |
| 8          | -0.859966 | -3.618882 | 0.648418                         |
| 6          | 1.339278  | 0.247425  | -0.241695                        |
| 6          | -0.657519 | -4.574994 | 1.271763                         |
| 6          | -3.871053 | 3.650732  | 0.397765                         |
| 6          | 0.171502  | 1.061316  | -0.115483                        |
| 6          | -0.966568 | 1.520601  | -0.045675                        |
| 16         |           |           |                                  |
| 105.507796 | Kcal/mol  | 4.575257  | eV -101.215543 H MutI_6_71.log   |
| 6          | -3.267574 | -0.375694 | 0.131857                         |
| 6          | 1.062217  | -2.761870 | 0.228950                         |
| 6          | 2.976746  | 1.844507  | -0.051896                        |
| 6          | -1.882422 | -0.082041 | 0.307017                         |
| 8          | 0.362156  | 4.493217  | -0.062706                        |
| 6          | -0.959933 | -1.177946 | 0.426536                         |
| 12         | -6.577132 | -0.480797 | -0.403063                        |
| 6          | -0.046847 | -1.993147 | 0.388777                         |
| 12         | 3.861503  | -2.442409 | -0.271100                        |
| 6          | 2.212122  | 2.840850  | 0.071152                         |
| 6          | 2.100599  | -3.380738 | -0.069685                        |
| 6          | 3.693308  | 0.736606  | -0.152616                        |
| 6          | 4.191292  | -0.418676 | -0.191978                        |
| 6          | 1.264383  | 3.714284  | -0.040883                        |
| 8          | -1.434445 | 1.091651  | 0.320640                         |
| 6          | -4.482914 | -0.546213 | -0.042818                        |
| 16         |           |           |                                  |
| 105.712767 | Kcal/mol  | 4.584145  | eV -101.215216 H Child_12_17.log |
| 8          | 5.640237  | -0.181765 | 0.309839                         |
| 6          | -3.541647 | 0.368719  | -0.155198                        |

|                                                               |           |           |           |
|---------------------------------------------------------------|-----------|-----------|-----------|
| 6                                                             | 5.618216  | -1.644100 | 0.156567  |
| 6                                                             | -2.283865 | 0.586572  | -0.202857 |
| 6                                                             | 4.560183  | 0.573344  | 0.229602  |
| 6                                                             | -4.808808 | 0.126329  | -0.085175 |
| 6                                                             | 4.290820  | -1.994419 | -0.068692 |
| 6                                                             | -1.003090 | 0.774180  | -0.208202 |
| 6                                                             | 3.468231  | 1.162479  | 0.133762  |
| 6                                                             | -6.056027 | -0.155189 | 0.017633  |
| 6                                                             | 3.070670  | -2.259967 | -0.265765 |
| 6                                                             | 0.281176  | 0.934227  | -0.189744 |
| 12                                                            | 1.769445  | 2.393090  | 0.027949  |
| 6                                                             | -7.239364 | -0.614933 | 0.157486  |
| 12                                                            | 1.867681  | -0.523877 | -0.192707 |
| 8                                                             | -8.363299 | -1.014987 | 0.297736  |
| 16                                                            |           |           |           |
| 105.957196 Kcal/mol 4.594745 eV -101.214827 H Child_16_24.log |           |           |           |
| 8                                                             | 1.144304  | -3.408212 | -0.379025 |
| 12                                                            | -2.692796 | -0.303854 | 0.445848  |
| 6                                                             | 1.342176  | -2.264022 | -0.175384 |
| 8                                                             | -4.578630 | 0.615164  | 0.082001  |
| 6                                                             | 2.845605  | -0.497506 | 0.471756  |
| 6                                                             | -5.388595 | 1.238742  | -0.464847 |
| 6                                                             | -1.370045 | 0.260839  | 1.948201  |
| 6                                                             | 3.908878  | 0.111323  | 0.728014  |
| 6                                                             | -1.813246 | -0.815565 | -1.387310 |
| 6                                                             | 1.569207  | -0.983886 | 0.086732  |
| 6                                                             | -0.398008 | 0.236871  | 1.168014  |
| 12                                                            | 3.466714  | 1.883820  | -0.162095 |
| 6                                                             | -0.686686 | -0.453658 | -0.993138 |
| 6                                                             | 0.400099  | 0.056269  | -0.094602 |
| 6                                                             | 1.619826  | 2.351252  | -0.896029 |
| 6                                                             | 1.002053  | 1.323474  | -0.562883 |
| 16                                                            |           |           |           |
| 106.475609 Kcal/mol 4.617225 eV -101.214001 H MutI_2_79.log   |           |           |           |
| 6                                                             | -3.499015 | 2.569930  | 0.226087  |
| 6                                                             | 5.658830  | -1.728704 | 0.492111  |
| 12                                                            | -4.504631 | 0.793711  | 0.031754  |
| 6                                                             | 2.011506  | -0.426864 | 0.441115  |
| 6                                                             | -0.071270 | 0.949770  | 0.382319  |
| 6                                                             | -2.269023 | -2.683016 | -0.946054 |
| 6                                                             | -1.041841 | 1.721317  | 0.331268  |
| 6                                                             | 4.436900  | -1.301129 | 0.425032  |
| 12                                                            | -0.916055 | -1.643014 | 0.170304  |
| 6                                                             | 0.706342  | -0.205914 | 0.411730  |
| 8                                                             | 5.406636  | 1.409424  | -0.911199 |
| 6                                                             | 5.202538  | 2.508976  | -0.692896 |
| 6                                                             | 3.202594  | -0.886314 | 0.413853  |
| 8                                                             | -4.031407 | -0.938363 | -0.276420 |
| 6                                                             | -2.288480 | 2.293908  | 0.266074  |
| 6                                                             | -3.041347 | -1.741435 | -0.571263 |
| 16                                                            |           |           |           |
| 106.480760 Kcal/mol 4.617449 eV -101.213993 H Child_7_21.log  |           |           |           |
| 6                                                             | 2.120675  | 0.428374  | -1.268477 |
| 6                                                             | -2.989421 | 1.784349  | 0.497023  |
| 6                                                             | 1.067690  | -0.234970 | -1.365848 |

|                                                               |           |           |           |
|---------------------------------------------------------------|-----------|-----------|-----------|
| 6                                                             | -1.971323 | 2.496348  | 0.579260  |
| 6                                                             | -0.185978 | -0.782634 | -1.352111 |
| 12                                                            | -2.950091 | -0.066568 | -0.321432 |
| 6                                                             | -1.390033 | -1.052205 | -1.204206 |
| 6                                                             | -4.036621 | -2.016396 | 0.389265  |
| 12                                                            | 1.986704  | 2.255111  | -0.385202 |
| 8                                                             | -4.309823 | -3.094772 | 0.647045  |
| 6                                                             | -0.718743 | 3.063266  | 0.543966  |
| 6                                                             | 3.308566  | -1.317940 | 1.407978  |
| 8                                                             | 3.959834  | -2.449813 | -0.692536 |
| 6                                                             | 0.475224  | 3.356082  | 0.384818  |
| 6                                                             | 3.082722  | -0.818946 | 2.575931  |
| 6                                                             | 3.630670  | -1.889636 | 0.286322  |
| 16                                                            |           |           |           |
| 106.612992 Kcal/mol 4.623183 eV -101.213782 H Child_2_9.log   |           |           |           |
| 6                                                             | -4.787258 | -1.885612 | -0.812320 |
| 6                                                             | 3.127801  | 0.437253  | -0.052586 |
| 6                                                             | -3.994860 | -0.927993 | -0.470483 |
| 6                                                             | 2.407069  | 1.634294  | -0.012800 |
| 6                                                             | -3.069132 | -0.035651 | -0.207221 |
| 6                                                             | 4.006105  | -0.683506 | -0.243028 |
| 12                                                            | -2.011582 | 3.020805  | 0.114563  |
| 6                                                             | 2.616901  | -0.868995 | 0.109657  |
| 6                                                             | -2.177736 | 0.844301  | 0.062515  |
| 6                                                             | 1.283694  | 2.154203  | -0.011509 |
| 6                                                             | -0.752289 | 0.947989  | 0.182597  |
| 12                                                            | 0.539122  | -0.764681 | 0.341948  |
| 8                                                             | 5.110683  | -1.117709 | -0.575393 |
| 6                                                             | -0.103036 | 2.179774  | 0.110289  |
| 6                                                             | -1.537760 | -3.360376 | 0.471036  |
| 8                                                             | -0.666617 | -2.593236 | 0.546017  |
| 16                                                            |           |           |           |
| 106.884340 Kcal/mol 4.634950 eV -101.213349 H Child_5_35.log  |           |           |           |
| 6                                                             | 1.521094  | -2.730039 | 0.961706  |
| 6                                                             | -2.175847 | 2.270590  | 1.284201  |
| 6                                                             | 0.266118  | -2.603366 | 0.820911  |
| 8                                                             | 4.071422  | 0.836205  | 0.440798  |
| 6                                                             | -1.038191 | -2.276960 | 0.560941  |
| 6                                                             | 2.939083  | 1.178528  | 0.248023  |
| 6                                                             | -2.112827 | -1.825154 | 0.177226  |
| 6                                                             | 1.681322  | 1.416575  | -0.029080 |
| 12                                                            | 1.766023  | -1.515645 | -0.682977 |
| 6                                                             | -2.584051 | 1.309897  | 0.581720  |
| 8                                                             | -3.056050 | -1.009895 | -0.302277 |
| 6                                                             | -1.389258 | 0.464075  | -1.235804 |
| 12                                                            | -0.257196 | 2.296352  | 0.358254  |
| 6                                                             | -2.447049 | 0.323342  | -0.426269 |
| 6                                                             | 1.104743  | 0.465019  | -0.993873 |
| 6                                                             | -0.136618 | 0.677664  | -1.484952 |
| 16                                                            |           |           |           |
| 107.055464 Kcal/mol 4.642370 eV -101.213077 H Child_15_12.log |           |           |           |
| 12                                                            | -3.104947 | 1.267961  | 0.347932  |
| 6                                                             | 3.109316  | -1.542292 | -0.379461 |
| 6                                                             | -3.596876 | -0.853893 | 0.532763  |
| 6                                                             | 4.201348  | -1.954607 | 0.141585  |

|                                                               |           |           |           |
|---------------------------------------------------------------|-----------|-----------|-----------|
| 8                                                             | -1.428341 | 2.209386  | 0.137146  |
| 8                                                             | 5.280338  | -2.203914 | 0.602361  |
| 6                                                             | -2.304404 | -0.809958 | 0.790720  |
| 6                                                             | 2.089690  | -0.804062 | -0.535805 |
| 6                                                             | -0.349837 | 1.490729  | -0.067586 |
| 6                                                             | 1.180087  | 0.123783  | -0.355534 |
| 6                                                             | -0.994154 | -0.804819 | 0.772782  |
| 6                                                             | 2.040425  | 2.533785  | -0.504535 |
| 6                                                             | -0.198441 | 0.082726  | 0.130455  |
| 6                                                             | 3.023749  | 3.289171  | -0.134855 |
| 6                                                             | 1.072627  | 1.608566  | -0.434061 |
| 12                                                            | -4.099816 | -2.451174 | -0.819172 |
| 16                                                            |           |           |           |
| 107.075709 Kcal/mol 4.643248 eV -101.213044 H Child_1_53.log  |           |           |           |
| 12                                                            | -2.837396 | 1.080292  | 0.382014  |
| 6                                                             | 2.710019  | 3.380400  | -0.772405 |
| 8                                                             | -2.498172 | 0.378557  | -1.414938 |
| 12                                                            | 1.730427  | -1.737167 | 0.743203  |
| 6                                                             | -1.373021 | -0.304679 | -1.151033 |
| 6                                                             | 2.331932  | 2.398775  | -0.030388 |
| 6                                                             | -0.273691 | -0.603035 | -1.814770 |
| 6                                                             | 1.753007  | 1.451646  | 0.644506  |
| 8                                                             | -1.118600 | 1.528297  | 1.216469  |
| 6                                                             | 1.941182  | -1.756632 | -1.382219 |
| 6                                                             | -1.012572 | -0.668389 | 0.286318  |
| 6                                                             | 1.054825  | 0.450705  | 1.131734  |
| 6                                                             | 0.910315  | -1.193047 | -1.878328 |
| 6                                                             | -0.361674 | 0.473514  | 0.980188  |
| 6                                                             | -0.566193 | -1.918577 | 0.709313  |
| 6                                                             | -0.077828 | -2.939404 | 1.291274  |
| 16                                                            |           |           |           |
| 107.440229 Kcal/mol 4.659055 eV -101.212464 H Child_14_23.log |           |           |           |
| 6                                                             | 0.347935  | 1.645558  | -1.107782 |
| 8                                                             | 6.850416  | -0.949328 | -0.177311 |
| 6                                                             | 1.176839  | 0.861424  | -0.607620 |
| 6                                                             | 5.666609  | -0.795193 | -0.093755 |
| 12                                                            | -1.587963 | 2.154253  | -0.784586 |
| 6                                                             | 4.411468  | -0.625708 | -0.007951 |
| 6                                                             | 1.888970  | -0.112627 | 0.120090  |
| 6                                                             | 3.162878  | -0.385924 | 0.067876  |
| 8                                                             | -4.811036 | -2.820048 | -0.185208 |
| 6                                                             | -2.002728 | 1.021089  | 1.213010  |
| 6                                                             | -2.834985 | 0.311642  | -0.984119 |
| 6                                                             | -1.471672 | 2.010012  | 1.824690  |
| 6                                                             | -4.181852 | -1.820053 | -0.265847 |
| 6                                                             | -2.151452 | -0.054020 | 0.247962  |
| 6                                                             | -3.401578 | -0.779809 | -0.312193 |
| 12                                                            | -0.076839 | -0.279530 | 0.979084  |
| 16                                                            |           |           |           |
| 107.529685 Kcal/mol 4.662934 eV -101.212321 H Child_6_13.log  |           |           |           |
| 12                                                            | -1.411233 | -2.602358 | 0.270452  |
| 6                                                             | -7.015493 | 1.241349  | -0.331717 |
| 6                                                             | -1.916700 | -1.076024 | -0.899463 |
| 6                                                             | 2.263922  | 3.215578  | 0.735993  |
| 8                                                             | 2.764071  | 0.065973  | -1.256270 |

|    |           |           |           |
|----|-----------|-----------|-----------|
| 8  | -6.603187 | 1.572615  | 0.686937  |
| 6  | 0.631556  | -2.448023 | 0.636111  |
| 6  | 2.183335  | 2.035464  | 1.164290  |
| 6  | 1.575698  | -0.532978 | -1.139852 |
| 6  | 2.026101  | 0.795111  | 1.702541  |
| 6  | 0.393553  | 0.157127  | -1.279031 |
| 6  | 1.783619  | -0.395015 | 1.872267  |
| 6  | 1.503804  | -1.526868 | 1.140653  |
| 6  | -0.843092 | -0.431016 | -1.081814 |
| 12 | 1.926276  | 1.825555  | -1.036455 |
| 6  | 1.502433  | -1.665881 | -0.228863 |

16

107.683095 Kcal/mol 4.669587 eV -101.212077 H Child\_2\_52.log

|    |           |           |           |
|----|-----------|-----------|-----------|
| 8  | -4.776454 | -0.351628 | -0.929475 |
| 6  | 2.509884  | 0.148884  | -0.483116 |
| 6  | -3.765104 | -0.240288 | -0.417815 |
| 6  | 1.688620  | 0.265979  | 0.725941  |
| 8  | -1.087550 | -1.902200 | 0.242012  |
| 6  | 3.006863  | -1.062493 | -0.987287 |
| 6  | -0.022353 | 2.289961  | -0.727433 |
| 12 | 0.452339  | 1.560565  | 1.682169  |
| 12 | -1.598371 | -0.026984 | 0.405305  |
| 6  | -1.043699 | 2.042964  | -0.005339 |
| 6  | 1.229457  | 2.168676  | -1.253220 |
| 6  | 0.220544  | -1.791447 | 0.469244  |
| 6  | 0.631435  | -0.562218 | 1.131637  |
| 6  | 2.198474  | 1.375351  | -1.166714 |
| 6  | 2.256574  | -2.032936 | -0.467050 |
| 6  | 1.200040  | -2.664491 | -0.077178 |

16

107.706278 Kcal/mol 4.670592 eV -101.212040 H Child\_4\_49.log

|    |           |           |           |
|----|-----------|-----------|-----------|
| 8  | -5.337250 | 0.886553  | -1.047868 |
| 6  | 5.171556  | 2.937583  | -0.040852 |
| 6  | -4.470396 | 0.230316  | -0.715048 |
| 6  | 4.477791  | 1.858836  | -0.151441 |
| 12 | -2.592801 | -0.631213 | 0.264963  |
| 6  | 3.721403  | 0.801074  | -0.118844 |
| 6  | -2.019325 | 1.423534  | 0.771030  |
| 6  | 2.830600  | -0.129835 | -0.156975 |
| 6  | -1.033928 | -1.937409 | 0.007545  |
| 12 | 0.779463  | 0.598096  | -0.351552 |
| 6  | 0.168947  | -2.257424 | -0.023663 |
| 6  | 2.623053  | -1.508542 | -0.024129 |
| 6  | -1.020886 | 1.404632  | 0.005432  |
| 6  | 2.864696  | -2.959931 | 0.143037  |
| 6  | 1.550409  | -2.348077 | 0.014012  |
| 8  | -3.090684 | 1.027055  | 1.395174  |

16

107.724493 Kcal/mol 4.671382 eV -101.212011 H Original2D\_2\_1.log

|    |           |           |           |
|----|-----------|-----------|-----------|
| 6  | 0.423922  | 1.020202  | 0.000000  |
| 6  | 1.727550  | 1.191163  | 0.000000  |
| 12 | -1.303109 | 2.421545  | 0.000000  |
| 6  | -2.430734 | 0.105514  | -0.000000 |
| 6  | -0.000000 | -0.361381 | -0.000000 |
| 6  | -3.305192 | 1.005835  | -0.000000 |

|                                                               |           |           |           |
|---------------------------------------------------------------|-----------|-----------|-----------|
| 8                                                             | -0.038458 | -2.600219 | -0.000000 |
| 6                                                             | 0.809237  | -1.545962 | -0.000000 |
| 6                                                             | 3.142158  | -0.707950 | 0.000000  |
| 12                                                            | -3.968108 | 3.024408  | -0.000000 |
| 6                                                             | -1.357246 | -0.808116 | -0.000000 |
| 6                                                             | 2.231631  | -1.856893 | 0.000000  |
| 8                                                             | 2.697678  | -3.013062 | 0.000000  |
| 6                                                             | -1.458935 | -2.235485 | -0.000000 |
| 6                                                             | 2.933349  | 0.708310  | 0.000000  |
| 6                                                             | 4.281065  | 0.077230  | 0.000000  |
| 16                                                            |           |           |           |
| 107.792696 Kcal/mol 4.674340 eV -101.211902 H Child_9_39.log  |           |           |           |
| 12                                                            | -2.274513 | -1.725740 | 0.635364  |
| 8                                                             | -0.501920 | 2.827905  | -0.403024 |
| 8                                                             | 3.005629  | -3.243482 | -0.744657 |
| 6                                                             | 0.723133  | 2.689615  | -0.083611 |
| 6                                                             | -4.482285 | -1.623784 | 0.502511  |
| 12                                                            | -1.691521 | 1.341194  | -0.546419 |
| 6                                                             | 2.551838  | -2.194445 | -0.506410 |
| 6                                                             | -0.601872 | -0.632843 | -0.034631 |
| 6                                                             | 1.876526  | 2.385780  | 0.233958  |
| 6                                                             | 0.630994  | -0.823070 | -0.121664 |
| 6                                                             | -4.106123 | -0.384976 | 0.115481  |
| 6                                                             | 2.039392  | -0.997302 | -0.161627 |
| 6                                                             | -3.722507 | 0.748836  | -0.397458 |
| 6                                                             | 2.902052  | 0.060477  | 0.297754  |
| 6                                                             | 2.818896  | 1.417400  | 0.470891  |
| 6                                                             | 3.963742  | 0.677508  | 1.037159  |
| 16                                                            |           |           |           |
| 107.856322 Kcal/mol 4.677099 eV -101.211800 H MutI_11_67.log  |           |           |           |
| 6                                                             | 3.631748  | 0.878283  | 0.013210  |
| 6                                                             | -2.091200 | -1.373270 | -0.423579 |
| 6                                                             | -0.337643 | -2.463290 | 0.074931  |
| 6                                                             | -2.930478 | 1.774655  | 0.510487  |
| 6                                                             | 3.772907  | -0.348583 | 0.179103  |
| 12                                                            | -0.163297 | 2.265476  | -0.078540 |
| 12                                                            | -3.592856 | -0.019309 | 0.047445  |
| 6                                                             | -2.027000 | 2.627463  | 0.688054  |
| 6                                                             | 1.898475  | 2.686287  | -0.238997 |
| 6                                                             | 2.156881  | -2.279849 | 0.312923  |
| 6                                                             | 0.892589  | -2.672930 | 0.235837  |
| 8                                                             | -0.316147 | 0.376003  | -0.693014 |
| 8                                                             | -1.660527 | -2.721581 | 0.029733  |
| 6                                                             | 3.142704  | -1.521766 | 0.261983  |
| 6                                                             | -0.918593 | -0.706992 | -0.545443 |
| 6                                                             | 2.957482  | 2.035096  | -0.121945 |
| 16                                                            |           |           |           |
| 108.009914 Kcal/mol 4.683759 eV -101.211556 H Child_13_15.log |           |           |           |
| 6                                                             | -1.504649 | 2.072499  | 0.744790  |
| 6                                                             | 1.303835  | -1.570914 | -0.257387 |
| 6                                                             | -0.593984 | 2.098305  | -0.096833 |
| 6                                                             | 2.418534  | -1.321228 | 0.442235  |
| 8                                                             | -2.546425 | 1.648860  | 1.408299  |
| 12                                                            | 1.892486  | -0.279762 | -1.827369 |
| 6                                                             | 0.475170  | 1.979018  | -0.935616 |

|                                                               |           |           |           |
|---------------------------------------------------------------|-----------|-----------|-----------|
| 6                                                             | -0.017874 | -1.791768 | 0.120914  |
| 12                                                            | -2.291301 | 0.003329  | 0.329618  |
| 6                                                             | 3.556474  | -0.846020 | 0.760913  |
| 6                                                             | 1.408989  | 1.664319  | -1.703164 |
| 6                                                             | -1.264462 | -1.734796 | 0.252028  |
| 6                                                             | 5.754007  | 0.460334  | 1.196093  |
| 8                                                             | -5.560402 | -1.304679 | -0.209380 |
| 6                                                             | 4.722359  | -0.298994 | 1.026543  |
| 6                                                             | -4.651668 | -0.616798 | -0.153571 |
| 16                                                            |           |           |           |
| 108.204716 Kcal/mol 4.692207 eV -101.211245 H Child_2_17.log  |           |           |           |
| 6                                                             | -0.374804 | 2.274869  | 0.000202  |
| 8                                                             | 5.177113  | -0.454569 | -0.007710 |
| 12                                                            | -1.321456 | 0.809920  | 1.408517  |
| 6                                                             | 4.088633  | 0.014350  | 0.011065  |
| 6                                                             | 0.733978  | 1.676016  | -0.001964 |
| 6                                                             | -3.323330 | 0.325155  | -0.701635 |
| 6                                                             | -0.369767 | -0.780635 | -0.014524 |
| 6                                                             | -3.328761 | -0.909505 | 0.010010  |
| 6                                                             | -3.311256 | 0.324603  | 0.721486  |
| 6                                                             | -2.573744 | -2.066181 | 0.001722  |
| 6                                                             | 1.694487  | 0.616979  | 0.004600  |
| 6                                                             | 3.028596  | 0.781626  | 0.015172  |
| 6                                                             | 1.057832  | -0.788912 | -0.007342 |
| 12                                                            | -1.341809 | 0.829608  | -1.412817 |
| 6                                                             | -1.332043 | -1.764533 | -0.006535 |
| 8                                                             | 1.825417  | -1.782597 | -0.010032 |
| 16                                                            |           |           |           |
| 108.379813 Kcal/mol 4.699799 eV -101.210966 H Child_11_27.log |           |           |           |
| 8                                                             | -4.239090 | 1.187202  | -0.014012 |
| 6                                                             | 2.890636  | -2.019355 | -0.008085 |
| 12                                                            | -0.993309 | 1.985268  | 0.024062  |
| 6                                                             | 3.889362  | -1.302640 | -0.015077 |
| 6                                                             | -2.781309 | 0.905316  | 0.023249  |
| 6                                                             | 1.592265  | -2.390359 | 0.006212  |
| 6                                                             | 0.996170  | 2.440790  | -0.002921 |
| 8                                                             | 4.796587  | -0.378340 | -0.021600 |
| 6                                                             | -4.444855 | -0.247925 | -0.021871 |
| 6                                                             | 0.359150  | -2.434503 | 0.021326  |
| 6                                                             | -5.549958 | -0.989751 | -0.071402 |
| 6                                                             | -0.934991 | -2.055684 | 0.033638  |
| 6                                                             | -2.969516 | -0.462236 | 0.020680  |
| 6                                                             | -2.024210 | -1.478775 | 0.032938  |
| 6                                                             | 2.236831  | 2.303359  | 0.010269  |
| 12                                                            | 3.991857  | 1.341373  | -0.014798 |
| 16                                                            |           |           |           |
| 108.679216 Kcal/mol 4.712783 eV -101.210489 H Child_2_38.log  |           |           |           |
| 8                                                             | -1.213286 | -2.457298 | 1.484001  |
| 8                                                             | 0.200294  | 3.921449  | 1.715388  |
| 6                                                             | -3.279369 | -2.268904 | -0.022071 |
| 6                                                             | -0.268869 | 3.394106  | 0.816472  |
| 6                                                             | -1.143692 | -1.559714 | 0.603031  |
| 12                                                            | 3.620732  | -0.820193 | -0.410440 |
| 6                                                             | -2.437236 | -1.220307 | -0.082127 |
| 6                                                             | 2.859667  | 1.077259  | -0.834197 |

|                                                              |           |           |           |
|--------------------------------------------------------------|-----------|-----------|-----------|
| 6                                                            | 0.166019  | -1.011646 | 0.183619  |
| 6                                                            | 1.679381  | 0.702910  | -0.575433 |
| 6                                                            | -2.803347 | 1.010319  | -1.484830 |
| 6                                                            | 2.460723  | -2.340374 | 0.244116  |
| 6                                                            | 1.313607  | -1.856193 | 0.296135  |
| 6                                                            | -2.716931 | -0.053333 | -0.833310 |
| 6                                                            | 0.374955  | 0.294559  | -0.269775 |
| 12                                                           | -1.047857 | 1.759751  | -0.743302 |
| 16                                                           |           |           |           |
| 108.703346 Kcal/mol 4.713829 eV -101.210451 H MutI_17_37.log |           |           |           |
| 6                                                            | 2.619299  | 1.089283  | -0.062590 |
| 6                                                            | -4.003512 | -1.008685 | 0.006996  |
| 12                                                           | -0.002554 | -0.331259 | 0.017740  |
| 6                                                            | 2.880031  | -0.306052 | 0.021752  |
| 6                                                            | -4.851475 | -1.997481 | -0.022521 |
| 12                                                           | -2.587359 | 1.984870  | 0.019939  |
| 8                                                            | -1.794082 | 0.049206  | 0.017752  |
| 6                                                            | 5.281298  | -1.350194 | -0.018652 |
| 6                                                            | -3.213668 | 0.017599  | 0.069274  |
| 6                                                            | -5.620388 | -3.036731 | -0.097289 |
| 6                                                            | 4.099610  | -0.849038 | -0.006636 |
| 6                                                            | -0.686725 | 2.798842  | 0.000098  |
| 6                                                            | 6.469508  | -1.898701 | -0.021231 |
| 8                                                            | 1.722406  | -1.036462 | 0.108488  |
| 6                                                            | 1.764193  | 1.979134  | -0.068277 |
| 6                                                            | 0.537224  | 2.571143  | -0.044599 |
| 16                                                           |           |           |           |
| 108.745095 Kcal/mol 4.715640 eV -101.210384 H MutD_16_58.log |           |           |           |
| 6                                                            | -1.532844 | 4.151118  | -0.029347 |
| 8                                                            | -3.078994 | 0.952264  | 0.129103  |
| 6                                                            | 1.918769  | 0.829668  | -0.062345 |
| 6                                                            | -1.712767 | 2.880249  | 0.022866  |
| 12                                                           | -1.981041 | -2.794528 | -0.275013 |
| 6                                                            | -1.761030 | 1.536466  | 0.104382  |
| 6                                                            | -0.578543 | -0.722611 | 0.199513  |
| 6                                                            | -3.268356 | -0.321637 | -0.152022 |
| 6                                                            | 4.365057  | 0.259442  | -0.242048 |
| 6                                                            | 0.711677  | 1.082768  | 0.041891  |
| 12                                                           | 1.877637  | -1.550030 | 0.525519  |
| 8                                                            | 5.542879  | 0.302072  | -0.407950 |
| 6                                                            | -0.167866 | -1.938123 | 0.292841  |
| 6                                                            | 3.104345  | 0.091993  | 0.014575  |
| 6                                                            | -3.505878 | -1.509759 | -0.427583 |
| 6                                                            | -0.650936 | 0.677093  | 0.108059  |
| 16                                                           |           |           |           |
| 108.811105 Kcal/mol 4.718502 eV -101.210279 H MutD_15_70.log |           |           |           |
| 6                                                            | -2.484119 | 1.071054  | 0.850287  |
| 6                                                            | 4.073382  | 0.895157  | -0.637699 |
| 6                                                            | 0.502509  | -2.356280 | 0.365421  |
| 6                                                            | 4.151436  | -1.471032 | -0.015189 |
| 6                                                            | 2.150925  | 2.514678  | -0.284095 |
| 6                                                            | 1.850409  | -2.440085 | 0.341882  |
| 6                                                            | 3.062584  | -2.254068 | 0.231810  |
| 6                                                            | 4.554442  | -0.357546 | -0.395430 |
| 8                                                            | -4.406472 | 0.529848  | -0.715328 |



|                                                               |           |           |           |
|---------------------------------------------------------------|-----------|-----------|-----------|
| 6                                                             | -3.346740 | 0.895479  | -0.033158 |
| 6                                                             | 3.294592  | 1.853275  | -0.591745 |
| 12                                                            | -2.589699 | -1.389235 | 0.133189  |
| 6                                                             | 1.024228  | 2.854560  | 0.122362  |
| 8                                                             | -4.187205 | -0.979496 | -0.955335 |
| 6                                                             | -0.720402 | -2.131318 | 0.346735  |
| 12                                                            | -0.737806 | 2.152064  | 0.829996  |
| 16                                                            |           |           |           |
| 109.093404 Kcal/mol 4.730744 eV -101.209829 H Child_12_44.log |           |           |           |
| 8                                                             | 5.994252  | -1.756303 | 0.632997  |
| 6                                                             | -6.969524 | -0.459696 | 0.624207  |
| 6                                                             | 5.061137  | -1.062032 | 0.367634  |
| 6                                                             | -5.685572 | -0.485366 | 0.431483  |
| 6                                                             | 4.036924  | -0.337652 | 0.111208  |
| 6                                                             | -4.404415 | -0.528149 | 0.198330  |
| 6                                                             | 2.979584  | 0.343958  | -0.096859 |
| 6                                                             | -3.139224 | -0.612396 | -0.065968 |
| 6                                                             | 1.811291  | 0.999752  | -0.222985 |
| 6                                                             | -1.998696 | -1.459848 | -0.496133 |
| 6                                                             | 0.586836  | 0.219843  | -0.276502 |
| 6                                                             | -1.780370 | -0.135622 | -0.220688 |
| 12                                                            | 0.018008  | -1.788264 | -0.554167 |
| 6                                                             | -0.674638 | 0.777445  | -0.101297 |
| 12                                                            | -0.088054 | 2.748133  | 0.135836  |
| 8                                                             | 1.743317  | 2.371324  | -0.194823 |
| 16                                                            |           |           |           |
| 109.472148 Kcal/mol 4.747168 eV -101.209225 H MutD_13_36.log  |           |           |           |
| 6                                                             | 2.510855  | 0.138330  | -0.087395 |
| 6                                                             | -2.494868 | 0.772671  | 0.880977  |
| 8                                                             | -0.542386 | -2.216335 | -2.172922 |
| 6                                                             | -0.532643 | -1.383698 | -1.203800 |
| 12                                                            | 5.175958  | -1.222054 | 1.099327  |
| 6                                                             | 0.384486  | -0.368557 | -1.031513 |
| 6                                                             | -2.335144 | -0.582792 | 0.614289  |
| 12                                                            | -1.228067 | 3.370098  | 0.211853  |
| 6                                                             | 1.274788  | 0.558169  | -0.693645 |
| 6                                                             | 0.957342  | 1.958674  | -0.777917 |
| 8                                                             | -3.250914 | -2.969439 | 1.055021  |
| 6                                                             | 0.533529  | 3.127916  | -0.740685 |
| 6                                                             | -2.515689 | 2.009736  | 0.991604  |
| 6                                                             | -2.612462 | -2.015308 | 0.630918  |
| 6                                                             | 3.576826  | -0.177746 | 0.458805  |
| 6                                                             | -1.585068 | -1.419117 | -0.173464 |
| 16                                                            |           |           |           |
| 109.597896 Kcal/mol 4.752621 eV -101.209025 H Child_17_26.log |           |           |           |
| 6                                                             | -2.628939 | -2.105587 | -0.108479 |
| 12                                                            | 3.178402  | 2.622526  | -0.149887 |
| 6                                                             | -3.456740 | -1.132036 | -0.239752 |
| 12                                                            | 0.123048  | 1.888964  | 0.313232  |
| 6                                                             | -1.566657 | -2.730489 | 0.249379  |
| 6                                                             | 2.907678  | 0.514500  | -0.164110 |
| 6                                                             | -3.720866 | 0.137532  | -0.443232 |
| 6                                                             | 1.878195  | -0.296597 | 0.004298  |
| 6                                                             | -0.253406 | -2.800964 | 0.299589  |
| 6                                                             | -1.622401 | 3.028432  | 0.336346  |

|            |           |           |                                 |
|------------|-----------|-----------|---------------------------------|
| 6          | -3.517919 | 1.364929  | -0.209049                       |
| 8          | 3.173606  | -2.322573 | -0.425421                       |
| 6          | 2.109159  | -1.798267 | -0.003608                       |
| 6          | -2.640165 | 2.382035  | -0.062976                       |
| 8          | 0.546849  | 0.023749  | 0.097335                        |
| 6          | 0.948554  | -2.521369 | 0.452350                        |
| 16         |           |           |                                 |
| 109.743291 | Kcal/mol  | 4.758926  | eV -101.208793 H Child_5_12.log |
| 8          | -5.372684 | -0.083947 | -1.359469                       |
| 6          | 5.152506  | -0.934261 | -1.499479                       |
| 6          | -4.344323 | -0.274514 | -0.789437                       |
| 6          | 3.932050  | -0.985748 | -1.145607                       |
| 6          | -3.264262 | -0.607436 | -0.143116                       |
| 12         | 4.915082  | 0.471625  | 0.251424                        |
| 6          | -1.179301 | 2.506597  | 0.162152                        |
| 6          | 2.875156  | -0.670522 | -0.284550                       |
| 8          | -0.732872 | 3.613905  | 0.329404                        |
| 6          | 1.625660  | -0.439830 | 0.420225                        |
| 6          | -2.018361 | 0.075427  | 0.106034                        |
| 6          | 0.347345  | -0.655354 | 0.587896                        |
| 12         | -2.504196 | -2.199308 | 0.998294                        |
| 6          | -1.778097 | 1.398742  | -0.023927                       |
| 6          | 2.904816  | 0.166313  | 0.814038                        |
| 6          | -0.934222 | -0.830658 | 0.669755                        |
| 16         |           |           |                                 |
| 109.816099 | Kcal/mol  | 4.762083  | eV -101.208677 H Child_3_42.log |
| 12         | -8.084521 | 0.920857  | -0.013069                       |
| 6          | 3.160908  | 0.943964  | -0.016840                       |
| 6          | -1.402304 | -2.311999 | 0.041185                        |
| 6          | 3.011793  | -0.406426 | 0.070951                        |
| 6          | -1.682566 | -1.009748 | 0.148799                        |
| 6          | 3.032914  | 2.159520  | 0.075419                        |
| 6          | -0.643731 | -3.288517 | -0.092452                       |
| 6          | 2.864055  | -1.634261 | 0.102015                        |
| 6          | -1.607909 | 0.228938  | 0.128291                        |
| 8          | 2.977633  | 3.487875  | 0.029547                        |
| 8          | 0.304544  | -4.142305 | -0.161032                       |
| 6          | 1.701149  | 4.063766  | -0.168368                       |
| 6          | -1.072187 | 1.431492  | 0.093288                        |
| 6          | 0.645942  | 3.287891  | -0.139177                       |
| 6          | -0.351740 | 2.449057  | -0.030080                       |
| 12         | 2.068241  | -3.441408 | -0.005790                       |
| 16         |           |           |                                 |
| 109.855836 | Kcal/mol  | 4.763806  | eV -101.208614 H MutD_17_44.log |
| 6          | 0.816350  | -0.777669 | -0.501489                       |
| 6          | 4.604450  | -0.497980 | -0.917141                       |
| 6          | -3.904242 | 0.222993  | 0.079619                        |
| 6          | -4.094840 | 2.706542  | -0.598359                       |
| 8          | -3.678356 | -2.060506 | 0.500208                        |
| 12         | -5.536080 | -1.285033 | 0.805837                        |
| 8          | 5.947111  | 1.160416  | 1.506232                        |
| 12         | 6.707305  | -0.460180 | -0.871010                       |
| 6          | -3.921402 | 1.454664  | -0.281657                       |
| 6          | 5.349184  | 1.600927  | 2.387030                        |
| 6          | -1.727097 | -0.903294 | -0.155072                       |

|                                                               |           |           |           |
|---------------------------------------------------------------|-----------|-----------|-----------|
| 6                                                             | 2.031648  | -0.680750 | -0.670683 |
| 6                                                             | 3.369547  | -0.583912 | -0.815782 |
| 6                                                             | -0.509834 | -0.856724 | -0.311344 |
| 6                                                             | -3.098423 | -0.940167 | 0.140042  |
| 6                                                             | -4.282798 | 3.945918  | -0.900072 |
| 16                                                            |           |           |           |
| 109.987092 Kcal/mol 4.769498 eV -101.208405 H Child_10_58.log |           |           |           |
| 6                                                             | -1.037029 | -1.354646 | 0.377789  |
| 6                                                             | 8.663949  | 1.684736  | -0.640804 |
| 6                                                             | -2.091726 | -1.644273 | -0.351877 |
| 6                                                             | 7.536092  | 1.096576  | -0.427372 |
| 12                                                            | 0.999705  | -1.603520 | 0.403350  |
| 6                                                             | 6.370968  | 0.530334  | -0.193179 |
| 6                                                             | -3.193849 | -1.705687 | -1.045976 |
| 6                                                             | 5.253304  | -0.002668 | 0.019354  |
| 6                                                             | -4.215094 | -0.850074 | -1.136172 |
| 8                                                             | -5.375605 | 2.416542  | -0.285497 |
| 6                                                             | 2.897157  | -0.989350 | 0.433101  |
| 6                                                             | 4.044902  | -0.518992 | 0.237525  |
| 8                                                             | -3.746976 | 1.184073  | 0.765885  |
| 6                                                             | -4.733439 | 1.382053  | -0.138046 |
| 6                                                             | -4.936785 | 0.160829  | -0.966897 |
| 12                                                            | -2.197209 | 0.308690  | 1.192669  |
| 16                                                            |           |           |           |
| 110.262529 Kcal/mol 4.781442 eV -101.207966 H Child_8_56.log  |           |           |           |
| 6                                                             | 5.064939  | 1.529405  | -0.210239 |
| 8                                                             | -5.427047 | 2.054140  | 0.863778  |
| 6                                                             | 4.262277  | 0.401769  | 0.223006  |
| 12                                                            | -0.770696 | 0.673162  | -0.494623 |
| 8                                                             | 3.974434  | -0.782531 | 0.723299  |
| 6                                                             | -4.638212 | 1.225878  | 0.518735  |
| 12                                                            | 2.247288  | -1.508618 | 0.667998  |
| 6                                                             | 1.012309  | 1.653317  | -0.701687 |
| 6                                                             | -3.898078 | 0.227431  | 0.174904  |
| 6                                                             | -0.949210 | -1.922330 | -0.002384 |
| 6                                                             | 2.252244  | 1.688727  | -0.590473 |
| 6                                                             | 0.258209  | -1.831671 | 0.277169  |
| 6                                                             | -2.709137 | -0.237674 | -0.190471 |
| 6                                                             | -2.302923 | -1.693283 | -0.396478 |
| 6                                                             | 3.590908  | 1.437255  | -0.341899 |
| 6                                                             | -2.959694 | -2.503392 | -1.223034 |
| 16                                                            |           |           |           |
| 110.294851 Kcal/mol 4.782843 eV -101.207914 H Child_7_50.log  |           |           |           |
| 8                                                             | 5.653431  | 1.343394  | 0.289438  |
| 8                                                             | -6.795409 | 0.866269  | 0.705712  |
| 6                                                             | 3.184340  | 0.989444  | -0.325745 |
| 6                                                             | -5.694160 | 0.479210  | 0.406358  |
| 6                                                             | 4.502943  | 0.978971  | 0.127280  |
| 6                                                             | 3.865200  | -1.564647 | 1.089646  |
| 6                                                             | 1.830588  | 1.078692  | -0.455251 |
| 6                                                             | -4.522071 | 0.106586  | 0.073499  |
| 12                                                            | -1.424679 | 0.965842  | -0.271794 |
| 6                                                             | 2.691203  | -1.413752 | 0.448289  |
| 6                                                             | 3.564271  | -0.206356 | 0.227109  |
| 6                                                             | -3.240568 | -0.118979 | -0.160580 |

|                                                              |           |           |           |
|--------------------------------------------------------------|-----------|-----------|-----------|
| 6                                                            | -2.432901 | -1.296578 | -0.351435 |
| 6                                                            | 0.604563  | 0.882626  | -0.572785 |
| 6                                                            | -1.350439 | -1.939511 | -0.495236 |
| 12                                                           | 0.684513  | -1.426804 | -0.397214 |
| 16                                                           |           |           |           |
| 110.413956 Kcal/mol 4.788008 eV -101.207725 H MutD_16_50.log |           |           |           |
| 6                                                            | 5.751658  | -0.211897 | -0.069140 |
| 6                                                            | -2.520272 | 0.032224  | -0.309741 |
| 6                                                            | 1.070322  | -0.609845 | -0.138204 |
| 6                                                            | -0.222934 | 1.373910  | 0.036757  |
| 6                                                            | -0.638388 | 2.698289  | 0.184101  |
| 6                                                            | 1.112286  | 0.815206  | 0.004780  |
| 6                                                            | 2.337741  | 1.420831  | 0.079776  |
| 12                                                           | -1.408270 | -1.797259 | -0.362480 |
| 6                                                            | -1.305679 | -4.007194 | 0.162679  |
| 6                                                            | 4.790923  | 0.640178  | 0.030396  |
| 12                                                           | -3.436614 | 2.005476  | 0.052128  |
| 8                                                            | -1.818972 | 3.184147  | 0.258005  |
| 6                                                            | -1.330208 | 0.509081  | -0.147792 |
| 8                                                            | -0.855039 | -5.001307 | 0.482504  |
| 6                                                            | 0.639745  | -1.778061 | -0.272034 |
| 6                                                            | 3.569922  | 1.123724  | 0.071781  |
| 16                                                           |           |           |           |
| 110.718761 Kcal/mol 4.801226 eV -101.207239 H MutI_4_65.log  |           |           |           |
| 6                                                            | -3.176330 | 1.578653  | 0.067865  |
| 12                                                           | -0.201566 | 2.284597  | 0.052387  |
| 6                                                            | 0.965588  | -3.685884 | 0.082531  |
| 6                                                            | 3.103810  | 0.595467  | -0.000981 |
| 6                                                            | -3.138710 | -1.055940 | -0.153870 |
| 8                                                            | 1.603387  | 2.479380  | -0.005524 |
| 6                                                            | 3.946503  | 2.817780  | -0.253756 |
| 8                                                            | -1.960642 | 2.112022  | 0.095811  |
| 6                                                            | -0.272100 | -3.542143 | -0.040138 |
| 6                                                            | -2.461740 | -2.212371 | -0.183216 |
| 6                                                            | -4.499156 | 1.513249  | 0.164827  |
| 12                                                           | 2.677048  | -2.600006 | 0.133843  |
| 6                                                            | 3.200005  | -0.639268 | 0.097757  |
| 6                                                            | -1.504772 | -3.002998 | -0.129811 |
| 6                                                            | -3.512274 | 0.137864  | -0.064155 |
| 6                                                            | 2.874550  | 2.004538  | -0.079895 |
| 16                                                           |           |           |           |
| 110.738381 Kcal/mol 4.802077 eV -101.207208 H Child_9_61.log |           |           |           |
| 8                                                            | 4.828534  | -2.068378 | -0.022218 |
| 12                                                           | -1.763017 | 1.521982  | -0.017682 |
| 6                                                            | 4.013647  | -1.185423 | -0.010738 |
| 8                                                            | 0.038020  | 1.748331  | -0.017536 |
| 6                                                            | 3.240394  | -0.150691 | 0.009844  |
| 6                                                            | -3.703844 | 0.747311  | -0.011519 |
| 6                                                            | -0.234051 | -1.584582 | 0.010055  |
| 6                                                            | 0.819401  | -0.944088 | -0.004342 |
| 6                                                            | -4.324427 | -0.066791 | -1.084867 |
| 6                                                            | -1.548939 | -1.912716 | 0.018005  |
| 6                                                            | -4.326937 | -0.049830 | 1.083868  |
| 6                                                            | -2.780110 | -1.822466 | 0.018773  |
| 6                                                            | 1.317390  | 1.407399  | -0.005298 |

|                                                              |           |           |           |
|--------------------------------------------------------------|-----------|-----------|-----------|
| 6                                                            | 1.784716  | 0.078104  | -0.004987 |
| 6                                                            | -3.886001 | -0.959897 | 0.011290  |
| 12                                                           | 3.333028  | 1.913218  | 0.029142  |
| 16                                                           |           |           |           |
| 110.882516 Kcal/mol 4.808327 eV -101.206978 H Child_17_8.log |           |           |           |
| 8                                                            | 5.094653  | 2.213963  | 0.080721  |
| 6                                                            | -1.862683 | -1.614130 | 0.103652  |
| 6                                                            | -8.619298 | 1.965006  | -0.180740 |
| 6                                                            | -3.044734 | -1.189848 | 0.144988  |
| 6                                                            | 3.841088  | 2.605899  | 0.074387  |
| 6                                                            | -0.610383 | -2.001417 | 0.048771  |
| 12                                                           | 5.424327  | 0.260913  | -0.040978 |
| 6                                                            | -4.235422 | -0.672449 | 0.127962  |
| 6                                                            | -7.551029 | 1.234068  | -0.104454 |
| 6                                                            | 0.607899  | -2.321142 | -0.011790 |
| 6                                                            | 2.771705  | 1.763338  | 0.083625  |
| 6                                                            | -5.360208 | -0.114499 | 0.089554  |
| 6                                                            | -6.471730 | 0.544067  | -0.006004 |
| 12                                                           | 2.560396  | -1.450768 | -0.087711 |
| 6                                                            | 1.918257  | 0.840121  | -0.041547 |
| 8                                                            | 4.390666  | -1.208440 | -0.133991 |
| 16                                                           |           |           |           |
| 110.989126 Kcal/mol 4.812950 eV -101.206808 H MutD_18_40.log |           |           |           |
| 6                                                            | -2.612457 | -0.392350 | -0.063582 |
| 6                                                            | -2.106376 | 0.923784  | 0.116028  |
| 6                                                            | 2.257152  | -1.205714 | -0.204903 |
| 6                                                            | -0.276235 | 2.717714  | 0.315606  |
| 12                                                           | 0.181457  | -1.349980 | -0.412643 |
| 6                                                            | 0.837625  | 3.272112  | 0.173138  |
| 6                                                            | -5.177709 | -0.800617 | 0.255352  |
| 6                                                            | 4.773941  | -1.335158 | 0.488125  |
| 6                                                            | 6.009470  | -1.337386 | 0.876932  |
| 6                                                            | 3.514117  | -1.268791 | 0.125657  |
| 6                                                            | -3.920236 | -0.634445 | 0.074035  |
| 6                                                            | -1.332679 | 1.860139  | 0.337012  |
| 8                                                            | -1.679049 | -1.347831 | -0.342035 |
| 8                                                            | 1.614335  | 0.023475  | -0.655881 |
| 12                                                           | 2.103376  | 1.811512  | -0.402109 |
| 6                                                            | -6.449991 | -0.956543 | 0.466659  |
| 16                                                           |           |           |           |
| 111.574873 Kcal/mol 4.838351 eV -101.205875 H MutI_1_65.log  |           |           |           |
| 6                                                            | 3.602250  | 2.918037  | 0.000000  |
| 8                                                            | 4.578480  | 3.555841  | 0.000000  |
| 6                                                            | 1.174577  | -1.415784 | 0.000000  |
| 6                                                            | 1.222806  | 2.939152  | 0.000000  |
| 8                                                            | -3.494243 | 0.751663  | 0.000000  |
| 6                                                            | -3.617301 | -0.580125 | 0.000000  |
| 12                                                           | -1.958387 | 1.871283  | 0.000000  |
| 6                                                            | 0.507838  | 4.186211  | 0.000000  |
| 6                                                            | 2.455789  | 2.204270  | 0.000000  |
| 12                                                           | -1.702916 | -9.042718 | 0.000000  |
| 6                                                            | -1.330329 | -1.866444 | 0.000000  |
| 6                                                            | 2.475057  | 0.792920  | 0.000000  |
| 6                                                            | 0.000000  | -1.837267 | 0.000000  |
| 6                                                            | 1.968088  | -0.332485 | 0.000000  |

|                                                               |           |           |           |
|---------------------------------------------------------------|-----------|-----------|-----------|
| 6                                                             | -0.142948 | 2.870165  | 0.000000  |
| 6                                                             | -2.438870 | -1.279118 | 0.000000  |
| 16                                                            |           |           |           |
| 111.675208 Kcal/mol 4.842701 eV -101.205715 H Child_10_34.log |           |           |           |
| 8                                                             | 3.334431  | 2.946183  | 0.280744  |
| 6                                                             | -2.071888 | 2.417135  | -0.348200 |
| 6                                                             | 3.869138  | -0.631000 | 0.386212  |
| 6                                                             | -2.209234 | -0.932453 | -0.376431 |
| 6                                                             | 3.226415  | 1.792394  | 0.290008  |
| 6                                                             | -3.233944 | 0.020598  | -0.075238 |
| 6                                                             | 3.315840  | -1.861134 | 0.250926  |
| 6                                                             | -2.755687 | 1.363767  | -0.223027 |
| 6                                                             | 2.862521  | 0.435045  | 0.231099  |
| 6                                                             | -4.425060 | -0.296179 | 0.428332  |
| 6                                                             | 2.782631  | -3.012493 | 0.023520  |
| 6                                                             | -1.099231 | -1.440149 | -0.630573 |
| 6                                                             | 1.513140  | 0.365120  | -0.034960 |
| 8                                                             | -5.468328 | -0.607033 | 0.863291  |
| 12                                                            | -0.364362 | 1.196887  | -0.475947 |
| 12                                                            | 0.899639  | -1.866647 | -0.247577 |
| 16                                                            |           |           |           |
| 111.874538 Kcal/mol 4.851345 eV -101.205397 H Child_7_22.log  |           |           |           |
| 6                                                             | 5.024759  | -0.852652 | 0.249214  |
| 12                                                            | -6.506635 | 0.063825  | 0.598752  |
| 6                                                             | 3.972737  | -1.579385 | 0.166922  |
| 12                                                            | -3.640008 | -0.679970 | 0.001327  |
| 6                                                             | 6.001586  | -0.004330 | 0.309702  |
| 6                                                             | -2.223875 | -2.051284 | -0.566577 |
| 6                                                             | 2.793638  | -2.075156 | 0.055920  |
| 6                                                             | -0.496487 | 2.433721  | -0.136558 |
| 6                                                             | 6.726749  | 1.081836  | 0.291853  |
| 6                                                             | -1.010966 | -2.341557 | -0.379161 |
| 8                                                             | 1.401927  | 4.010543  | -0.216357 |
| 6                                                             | -1.477818 | 1.665043  | -0.181525 |
| 6                                                             | 0.503559  | 3.250787  | -0.172735 |
| 6                                                             | 0.297063  | -2.471198 | -0.223898 |
| 6                                                             | 1.545232  | -2.396584 | -0.075843 |
| 8                                                             | -2.424095 | 0.919242  | -0.186748 |
| 16                                                            |           |           |           |
| 112.026141 Kcal/mol 4.857919 eV -101.205155 H Child_2_32.log  |           |           |           |
| 12                                                            | 1.693168  | 1.279611  | 1.056778  |
| 6                                                             | -2.550182 | -1.657871 | -0.161844 |
| 6                                                             | 2.474626  | -0.447041 | 0.139201  |
| 12                                                            | -2.116913 | -0.024014 | 1.111917  |
| 8                                                             | 0.916876  | 2.098423  | -0.502571 |
| 6                                                             | -1.483193 | -1.490905 | -0.803174 |
| 6                                                             | 1.538774  | -1.569655 | 0.563780  |
| 6                                                             | 1.774153  | -0.590360 | -1.078587 |
| 8                                                             | -2.113416 | 1.570250  | -0.130223 |
| 6                                                             | 0.656158  | -1.071554 | 1.568506  |
| 6                                                             | -0.181652 | -0.240316 | 2.020573  |
| 6                                                             | 0.529619  | -0.043412 | -1.585856 |
| 6                                                             | -0.169022 | -1.317681 | -1.258399 |
| 6                                                             | -1.246216 | 1.686701  | -1.035747 |
| 6                                                             | 0.064659  | 1.236452  | -1.108658 |

|                                                                  |           |           |           |
|------------------------------------------------------------------|-----------|-----------|-----------|
| 6                                                                | 1.035153  | -1.897114 | -0.753460 |
| 16                                                               |           |           |           |
| 112.027307 Kcal/mol 4.857970 eV -101.205154 H Child_11_62.log    |           |           |           |
| 6                                                                | 3.104681  | -2.969949 | -0.564176 |
| 6                                                                | -2.547722 | -0.987315 | -0.622803 |
| 6                                                                | 2.986342  | -1.694627 | -0.625147 |
| 6                                                                | -1.717982 | -2.206861 | -0.203523 |
| 6                                                                | 2.730770  | -0.399776 | -0.706946 |
| 6                                                                | -1.947799 | 0.256514  | -0.076770 |
| 6                                                                | 2.371701  | 0.817214  | -0.581291 |
| 6                                                                | -1.007869 | -2.187849 | 0.851695  |
| 6                                                                | 1.598086  | 1.899897  | -0.945740 |
| 6                                                                | -1.060193 | 0.157285  | 0.963038  |
| 6                                                                | 0.701677  | 2.764485  | -1.085891 |
| 6                                                                | -0.296612 | -1.079463 | 1.220863  |
| 8                                                                | -0.440874 | 1.314551  | 1.456998  |
| 12                                                               | -1.116533 | 2.270788  | -0.252342 |
| 12                                                               | 1.340889  | 0.381791  | 1.321589  |
| 8                                                                | -3.581969 | -1.070587 | -1.278350 |
| 16                                                               |           |           |           |
| 112.484681 Kcal/mol 4.877804 eV -101.204425 H Original3D_4_6.log |           |           |           |
| 12                                                               | 0.591421  | -0.541819 | 0.073304  |
| 6                                                                | 2.563622  | -0.431927 | 1.745936  |
| 6                                                                | -1.883569 | -1.983781 | 0.153760  |
| 6                                                                | -0.875366 | 1.682806  | -0.784628 |
| 6                                                                | 2.688897  | 0.782832  | 1.339354  |
| 6                                                                | 1.564574  | -1.336601 | -1.529323 |
| 6                                                                | -2.095345 | 1.338948  | -0.636678 |
| 6                                                                | 2.823284  | -1.395461 | -1.465500 |
| 6                                                                | -4.370342 | 0.536895  | 0.123131  |
| 6                                                                | 0.374434  | 1.926695  | -0.484046 |
| 8                                                                | -5.339161 | 0.096398  | 0.676403  |
| 8                                                                | -2.820828 | -2.625870 | 0.300894  |
| 6                                                                | 2.762275  | 1.834272  | 0.460886  |
| 12                                                               | 3.939819  | -0.815375 | 0.092218  |
| 6                                                                | 1.593596  | 2.120128  | -0.112244 |
| 6                                                                | -3.328557 | 1.012211  | -0.444757 |
| 16                                                               |           |           |           |
| 112.682833 Kcal/mol 4.886396 eV -101.204109 H Child_12_46.log    |           |           |           |
| 8                                                                | -2.607648 | 1.431439  | 2.465370  |
| 6                                                                | -2.683017 | -1.722104 | -2.008549 |
| 8                                                                | 4.481062  | 2.419493  | -1.198156 |
| 12                                                               | -0.980687 | -1.356946 | -0.695840 |
| 6                                                                | 3.379631  | 2.128837  | -0.834244 |
| 6                                                                | -2.501461 | 1.069100  | 1.283555  |
| 6                                                                | -3.384345 | -0.761723 | -1.588070 |
| 6                                                                | 2.200756  | 1.859460  | -0.411668 |
| 6                                                                | 0.993546  | -1.922292 | -0.328840 |
| 6                                                                | 1.057305  | 1.479290  | 0.018716  |
| 6                                                                | -3.731814 | 0.238029  | -0.734230 |
| 6                                                                | -0.105552 | 1.110598  | 0.429947  |
| 6                                                                | 2.197250  | -2.030323 | 0.014027  |
| 6                                                                | -3.517587 | 0.937600  | 0.263980  |
| 6                                                                | -1.244040 | 0.535952  | 0.686269  |
| 12                                                               | 3.401408  | -2.671554 | 1.455584  |

```

16
112.922282 Kcal/mol 4.896780 eV -101.203727 H Original2D_5_1.log
6 0.919500 2.309032 0.000000
6 1.287175 0.970921 0.000000
6 -0.369902 2.854097 0.000000
12 -0.000000 -0.740692 -0.000000
6 2.358116 2.852108 0.000000
6 -1.574287 3.183189 0.000000
6 -2.489892 -0.412680 -0.000000
6 -2.679421 -1.661453 -0.000000
6 2.753919 1.390773 0.000000
6 -2.307972 -2.977620 -0.000000
6 -0.982893 -3.372399 -0.000000
8 0.120501 -2.707785 -0.000000
6 -2.004407 -4.409110 -0.000000
6 3.919042 0.790657 0.000000
12 -2.811290 1.618453 -0.000000
8 4.974701 0.253006 0.000000
16
112.979184 Kcal/mol 4.899247 eV -101.203637 H Child_2_53.log
8 -2.698238 0.697102 -0.220864
8 2.862948 -1.475791 0.719351
6 -2.214275 -0.093015 0.707705
6 -0.480973 -2.679210 -0.488246
12 -0.516912 0.743819 1.822206
6 -1.621299 -2.323809 0.129532
6 0.488392 2.252989 0.018316
6 2.306888 -0.574887 0.066345
6 -2.397235 -1.481899 0.656542
6 0.462501 -1.960258 -0.892519
6 1.269163 1.420549 -0.822129
6 1.238894 -0.807503 -1.020419
6 0.657422 0.374344 -1.574127
6 2.222543 0.864594 0.276050
6 1.298724 1.502274 1.112296
12 -1.208267 1.528222 -1.239203
16
113.364488 Kcal/mol 4.915956 eV -101.203023 H Original2D_14_2.log
6 -2.774596 -1.086166 0.000000
6 -1.180500 0.447660 0.000000
6 -1.338338 -0.964556 0.000000
6 -0.131420 -1.678583 0.000000
6 1.062802 -0.916570 -0.000000
8 -3.427996 1.221786 0.000000
6 -3.645394 -0.165994 0.000000
6 0.000000 1.242294 -0.000000
6 2.567052 0.931017 -0.000000
6 1.198971 0.554154 -0.000000
12 1.164649 -3.402317 0.000000
6 -0.837843 2.507605 -0.000000
8 -0.720309 3.703185 -0.000000
6 -2.089924 1.473707 0.000000
6 3.808640 0.721172 -0.000000
12 3.281163 -1.413867 -0.000000
16

```



113.492744 Kcal/mol 4.921517 eV -101.202818 H Child\_2\_30.log

|    |           |           |           |
|----|-----------|-----------|-----------|
| 8  | 5.312071  | 0.483097  | 0.188473  |
| 6  | -3.843055 | -3.016036 | 0.196757  |
| 6  | 4.086732  | 0.335781  | 0.160869  |
| 6  | -2.815024 | -2.270305 | -0.046727 |
| 6  | -4.445703 | 2.468136  | 1.128844  |
| 6  | -2.082114 | -0.999793 | -0.483480 |
| 6  | 2.586120  | -1.867391 | 0.251526  |
| 6  | -0.507330 | 2.318678  | -0.467861 |
| 6  | 3.389303  | -0.928005 | 0.235986  |
| 12 | -2.103338 | 1.056353  | -0.600615 |
| 8  | -3.805606 | 1.928616  | 0.330623  |
| 6  | 3.110640  | 1.393499  | 0.023257  |
| 6  | -1.326070 | -2.075617 | -0.268845 |
| 6  | 2.025168  | 1.950306  | -0.113224 |
| 6  | 0.722761  | 2.272435  | -0.296165 |
| 12 | 0.648314  | -2.455005 | 0.094082  |

16

113.499181 Kcal/mol 4.921797 eV -101.202808 H Child\_9\_16.log

|    |           |           |           |
|----|-----------|-----------|-----------|
| 12 | -1.448533 | -2.230194 | -0.766793 |
| 6  | 6.901135  | 1.856975  | 0.270266  |
| 6  | -1.507075 | -0.222959 | -1.343930 |
| 6  | 5.792719  | 1.159633  | 0.227006  |
| 6  | -1.760490 | 0.926017  | -0.900340 |
| 6  | 4.754789  | 0.376777  | 0.198980  |
| 6  | -2.790951 | -2.952642 | 0.678304  |
| 6  | 3.725243  | -0.371108 | 0.150140  |
| 6  | -2.239913 | 1.937751  | -0.077432 |
| 6  | 2.646082  | -1.080755 | 0.042655  |
| 6  | -2.861602 | -1.787911 | 1.169716  |
| 6  | 1.583030  | -1.711362 | -0.196410 |
| 6  | -2.642066 | 3.172086  | -0.174818 |
| 8  | 0.514221  | -2.239173 | -0.440289 |
| 8  | -3.063746 | 4.276037  | -0.172985 |
| 12 | -2.652235 | 0.221033  | 1.153573  |

16

113.578284 Kcal/mol 4.925227 eV -101.202682 H Child\_3\_18.log

|    |           |           |           |
|----|-----------|-----------|-----------|
| 8  | -4.052695 | -2.189538 | -0.391284 |
| 6  | -0.853590 | 0.809064  | -2.219148 |
| 8  | -1.039533 | -0.552022 | 0.932925  |
| 6  | 2.841976  | 0.010082  | -1.658628 |
| 6  | 1.071831  | -1.390707 | 1.728159  |
| 6  | 0.391352  | 0.808997  | -2.099126 |
| 6  | -3.451326 | -1.225073 | -0.464245 |
| 6  | 3.292035  | -0.751172 | -0.699358 |
| 6  | 0.170033  | -0.396141 | 1.343559  |
| 6  | 2.215552  | -1.564777 | 1.181344  |
| 6  | 1.603949  | 0.653461  | -1.350539 |
| 12 | -1.978462 | 0.588495  | -0.451045 |
| 12 | -0.932618 | 2.553952  | 1.477947  |
| 6  | 0.757391  | 1.020233  | 1.130827  |
| 6  | 3.238699  | -1.525159 | 0.347379  |
| 6  | 1.333896  | 0.921711  | -0.016214 |

16

113.866532 Kcal/mol 4.937726 eV -101.202223 H MutD\_16\_68.log

|                                                               |           |           |           |
|---------------------------------------------------------------|-----------|-----------|-----------|
| 6                                                             | -3.983017 | -0.157097 | -0.168917 |
| 6                                                             | 2.316491  | 2.826825  | 0.081238  |
| 6                                                             | 4.500647  | 1.402641  | 0.180395  |
| 6                                                             | -5.246355 | -0.219570 | -0.056239 |
| 8                                                             | -0.227044 | 0.197704  | -0.315044 |
| 6                                                             | -6.520796 | -0.259898 | 0.070418  |
| 6                                                             | -2.690759 | -0.067302 | -0.260892 |
| 6                                                             | -1.446302 | 0.065676  | -0.293292 |
| 12                                                            | 1.612506  | 0.741063  | -0.095033 |
| 6                                                             | -7.802125 | -0.291539 | 0.209928  |
| 6                                                             | 3.318053  | -0.722503 | -0.007746 |
| 6                                                             | 4.546320  | 0.097464  | 0.133575  |
| 8                                                             | 3.430697  | -1.993310 | -0.053592 |
| 6                                                             | -9.094856 | -0.316252 | 0.358881  |
| 12                                                            | 5.564796  | -1.867570 | 0.151317  |
| 6                                                             | 3.476557  | 2.288708  | 0.131598  |
| 16                                                            |           |           |           |
| 114.574866 Kcal/mol 4.968443 eV -101.201094 H MutD_17_66.log  |           |           |           |
| 6                                                             | 2.795269  | 1.096242  | 1.203443  |
| 6                                                             | 1.539993  | -0.748831 | 0.531865  |
| 12                                                            | 1.619022  | -4.053898 | -0.230930 |
| 6                                                             | -0.447171 | 0.636608  | 2.181571  |
| 6                                                             | 1.060123  | -1.156339 | -0.568542 |
| 6                                                             | 2.929134  | 1.752849  | 0.153395  |
| 8                                                             | -6.028374 | -0.083553 | 0.178132  |
| 6                                                             | -1.479384 | 0.818450  | 1.343783  |
| 6                                                             | 0.746791  | 0.383001  | 2.474513  |
| 6                                                             | -1.623712 | 0.643869  | 0.109053  |
| 6                                                             | 2.478836  | 2.004747  | -1.100763 |
| 6                                                             | 1.627727  | 1.794207  | -2.000886 |
| 6                                                             | 1.801171  | 0.155516  | 1.576210  |
| 8                                                             | -1.567676 | 0.586955  | -1.137900 |
| 12                                                            | 0.220516  | 0.214175  | -1.972552 |
| 6                                                             | -4.979789 | -0.372075 | -0.216986 |
| 16                                                            |           |           |           |
| 114.685518 Kcal/mol 4.973241 eV -101.200917 H MutI_8_75.log   |           |           |           |
| 6                                                             | 1.357428  | -2.281847 | -0.844234 |
| 12                                                            | -3.410890 | 0.219241  | -0.172473 |
| 6                                                             | -2.579734 | 2.001844  | -0.790345 |
| 6                                                             | -1.368747 | 2.123505  | -0.397858 |
| 8                                                             | 3.415744  | 1.330860  | -0.758207 |
| 6                                                             | -1.160213 | -2.045487 | -0.874621 |
| 6                                                             | 2.392100  | 1.879031  | -0.462150 |
| 6                                                             | 2.389501  | -1.685058 | -0.193803 |
| 6                                                             | -0.086489 | 2.072560  | -0.156080 |
| 6                                                             | -1.985159 | -0.590131 | 1.178139  |
| 8                                                             | -0.795271 | -0.421684 | 1.512197  |
| 6                                                             | -2.193125 | -1.495561 | -0.353673 |
| 6                                                             | 0.125376  | -2.377125 | -1.042875 |
| 6                                                             | 3.008141  | -0.822175 | 0.506112  |
| 12                                                            | 1.137749  | -0.087524 | 1.332550  |
| 6                                                             | 1.153239  | 1.744776  | 0.105913  |
| 16                                                            |           |           |           |
| 114.846078 Kcal/mol 4.980204 eV -101.200662 H Child_11_57.log |           |           |           |
| 6                                                             | 0.964422  | 2.269967  | 1.935813  |

|                                                               |           |           |           |
|---------------------------------------------------------------|-----------|-----------|-----------|
| 12                                                            | 2.800483  | -1.995205 | -0.279376 |
| 6                                                             | 0.178855  | 1.305872  | 1.720920  |
| 6                                                             | 1.167064  | -3.114484 | 0.444669  |
| 12                                                            | 0.536972  | 2.373137  | -0.255551 |
| 6                                                             | 0.053820  | -2.544939 | 0.676919  |
| 6                                                             | -0.924476 | 0.755751  | 1.063813  |
| 6                                                             | 3.369604  | -0.176055 | -0.705304 |
| 6                                                             | -1.683919 | 1.392110  | 0.068442  |
| 8                                                             | -4.524038 | -0.711911 | -1.372235 |
| 6                                                             | 2.571988  | 0.679044  | -1.170671 |
| 6                                                             | -3.588104 | -0.334803 | -0.759327 |
| 6                                                             | -0.985393 | -1.751513 | 0.873332  |
| 6                                                             | -1.602659 | -0.589764 | 0.780545  |
| 6                                                             | -2.554765 | 0.098782  | -0.079161 |
| 8                                                             | 1.793029  | 1.652539  | -1.462868 |
| 16                                                            |           |           |           |
| 115.210162 Kcal/mol 4.995992 eV -101.200081 H Child_11_43.log |           |           |           |
| 8                                                             | -3.368740 | -2.393524 | 0.078777  |
| 12                                                            | 4.592956  | -0.586132 | 0.468655  |
| 6                                                             | -2.102250 | -2.711198 | -0.040247 |
| 8                                                             | 2.447851  | 2.687673  | -0.296847 |
| 12                                                            | -3.002685 | -0.476301 | 0.064966  |
| 6                                                             | 2.939959  | 0.385496  | -0.033226 |
| 6                                                             | -0.869871 | -2.679924 | -0.154204 |
| 6                                                             | 2.020887  | 1.507690  | -0.251227 |
| 6                                                             | 0.435077  | -2.350530 | -0.191241 |
| 6                                                             | 0.562241  | 1.357390  | -0.295906 |
| 6                                                             | -3.570524 | 3.584491  | 0.306043  |
| 6                                                             | 1.490956  | -1.705016 | -0.170911 |
| 6                                                             | -0.660502 | 1.380371  | -0.201398 |
| 6                                                             | 2.653244  | -1.001329 | -0.010649 |
| 6                                                             | -2.804224 | 2.540510  | 0.221426  |
| 6                                                             | -2.047684 | 1.424717  | 0.045057  |
| 16                                                            |           |           |           |
| 115.428370 Kcal/mol 5.005454 eV -101.199734 H Child_8_61.log  |           |           |           |
| 8                                                             | 1.226714  | 2.539454  | -0.936086 |
| 6                                                             | -5.621410 | 1.560645  | 0.228078  |
| 12                                                            | 3.050230  | 2.366285  | -0.229745 |
| 8                                                             | -5.571226 | 1.675898  | 1.387395  |
| 6                                                             | -0.439111 | -2.578190 | -0.102464 |
| 6                                                             | 3.047266  | 0.421461  | 0.644764  |
| 6                                                             | 0.658043  | -1.912110 | 0.568846  |
| 6                                                             | 0.838381  | 1.374804  | -0.424125 |
| 6                                                             | -1.617301 | -2.170898 | -0.687338 |
| 6                                                             | 1.733890  | 0.444379  | 0.332887  |
| 6                                                             | -1.088160 | -3.433397 | -1.118383 |
| 6                                                             | -0.232387 | 0.473777  | -0.393024 |
| 6                                                             | -1.474154 | 0.187486  | -0.987302 |
| 6                                                             | 0.595002  | -0.545606 | 0.360549  |
| 6                                                             | -2.100472 | -0.891022 | -0.824557 |
| 12                                                            | 2.696318  | -1.642184 | 1.129907  |
| 16                                                            |           |           |           |
| 115.437530 Kcal/mol 5.005851 eV -101.199719 H Child_13_8.log  |           |           |           |
| 6                                                             | 3.595173  | 0.416977  | -0.030414 |
| 6                                                             | -1.855667 | -3.510855 | 0.609638  |

|                                                               |           |           |           |
|---------------------------------------------------------------|-----------|-----------|-----------|
| 6                                                             | 4.826772  | 0.172937  | -0.072097 |
| 8                                                             | -2.281610 | -2.495534 | 0.219670  |
| 6                                                             | 2.320892  | 0.772479  | 0.065855  |
| 6                                                             | -5.619936 | -1.067392 | -0.578476 |
| 6                                                             | 1.112802  | 1.102997  | 0.184760  |
| 6                                                             | -5.669310 | 0.202161  | -0.356432 |
| 6                                                             | 6.104238  | -0.089643 | -0.115544 |
| 12                                                            | -3.470093 | -0.806609 | -0.244077 |
| 8                                                             | 8.531417  | -0.545105 | -0.193191 |
| 6                                                             | -5.308655 | 1.488695  | -0.084159 |
| 6                                                             | 7.349529  | -0.320326 | -0.151891 |
| 6                                                             | -3.999344 | 1.641874  | 0.109664  |
| 12                                                            | -0.752785 | 1.754915  | 0.335577  |
| 6                                                             | -2.743815 | 1.347671  | 0.200793  |
| 16                                                            |           |           |           |
| 115.456693 Kcal/mol 5.006682 eV -101.199689 H MutD_18_52.log  |           |           |           |
| 8                                                             | -3.875869 | 4.390582  | 0.126845  |
| 6                                                             | -5.640254 | -1.263752 | -0.163537 |
| 6                                                             | -2.018611 | -1.879065 | -0.001540 |
| 12                                                            | 0.000062  | -2.200144 | 0.084363  |
| 6                                                             | 4.338805  | -0.697817 | 0.165143  |
| 6                                                             | -6.808007 | -1.785253 | -0.218859 |
| 6                                                             | -4.287476 | 0.679221  | -0.016428 |
| 8                                                             | 6.555415  | 0.403123  | -0.194221 |
| 6                                                             | -4.171202 | 1.935047  | 0.020930  |
| 12                                                            | 8.047224  | 1.465022  | -0.146522 |
| 6                                                             | 1.936660  | -1.662835 | 0.299021  |
| 6                                                             | -4.015658 | 3.219687  | 0.077832  |
| 6                                                             | -4.383453 | -0.690932 | -0.094831 |
| 6                                                             | 5.429223  | -0.161476 | -0.001151 |
| 6                                                             | -3.145238 | -1.380738 | -0.074158 |
| 6                                                             | 3.097911  | -1.233448 | 0.221731  |
| 16                                                            |           |           |           |
| 115.499340 Kcal/mol 5.008532 eV -101.199621 H Child_11_29.log |           |           |           |
| 6                                                             | 3.328631  | -0.422395 | -0.014680 |
| 8                                                             | -4.846708 | -0.635933 | -0.031444 |
| 6                                                             | 1.947682  | 0.093925  | -0.035006 |
| 6                                                             | -3.695065 | -0.250065 | -0.003274 |
| 6                                                             | 3.234498  | -1.823899 | -0.003149 |
| 8                                                             | -3.458365 | 1.153604  | 0.007487  |
| 12                                                            | 3.832514  | 1.674319  | 0.002689  |
| 6                                                             | -2.223297 | 1.669549  | 0.014647  |
| 6                                                             | 0.748288  | -0.414645 | -0.028584 |
| 6                                                             | -2.497938 | -1.026549 | 0.013497  |
| 6                                                             | 2.178030  | -2.552793 | 0.012090  |
| 6                                                             | -1.079823 | 2.132806  | 0.023706  |
| 6                                                             | 0.033845  | -1.621858 | 0.003225  |
| 6                                                             | -1.380499 | -1.510510 | 0.011678  |
| 6                                                             | 0.881332  | -2.757804 | 0.029713  |
| 12                                                            | 0.966360  | 2.222686  | 0.001351  |
| 16                                                            |           |           |           |
| 115.814552 Kcal/mol 5.022201 eV -101.199118 H MutD_13_56.log  |           |           |           |
| 6                                                             | 5.792350  | -2.025970 | -0.420900 |
| 6                                                             | -3.360297 | 1.104092  | -0.050955 |
| 8                                                             | 4.094217  | 0.793534  | -0.185944 |

|                                                              |           |           |           |
|--------------------------------------------------------------|-----------|-----------|-----------|
| 6                                                            | -2.879572 | -0.040613 | -0.086043 |
| 12                                                           | -2.446591 | 2.876520  | 0.197747  |
| 6                                                            | 0.686306  | 2.664444  | -0.031686 |
| 8                                                            | 5.787773  | -2.384963 | 0.672366  |
| 6                                                            | 2.876035  | 0.893955  | -0.146692 |
| 6                                                            | -2.532670 | -2.543308 | -0.117918 |
| 6                                                            | -0.688814 | -1.001124 | -0.166785 |
| 6                                                            | -0.433015 | 3.126901  | 0.224001  |
| 6                                                            | -2.101803 | -1.245879 | -0.135423 |
| 6                                                            | 1.553801  | 0.286352  | -0.127735 |
| 12                                                           | -4.655743 | -2.977828 | 0.103398  |
| 6                                                            | 1.657636  | 1.669195  | -0.079875 |
| 6                                                            | 0.458726  | -0.563525 | -0.110840 |
| 16                                                           |           |           |           |
| 116.264750 Kcal/mol 5.041723 eV -101.198401 H MutD_7_70.log  |           |           |           |
| 6                                                            | 1.003635  | 2.084148  | 0.007800  |
| 6                                                            | -2.875583 | -2.852675 | -0.052653 |
| 6                                                            | 2.028810  | 1.401463  | 0.013885  |
| 8                                                            | -4.782487 | 0.641835  | 0.010986  |
| 6                                                            | 1.166528  | -1.821646 | 0.002243  |
| 8                                                            | 6.599850  | -0.348476 | -0.010160 |
| 6                                                            | -0.272650 | 2.522953  | -0.020276 |
| 6                                                            | -2.815166 | 2.202545  | -0.016171 |
| 6                                                            | 2.851485  | 0.243559  | 0.011633  |
| 12                                                           | -4.171402 | -1.165560 | 0.030525  |
| 6                                                            | 4.198449  | 0.241899  | 0.011993  |
| 6                                                            | -3.834134 | 1.512750  | -0.005076 |
| 6                                                            | -1.507179 | 2.528256  | -0.018883 |
| 12                                                           | -0.739039 | -2.534951 | -0.003445 |
| 6                                                            | 5.419641  | -0.116183 | 0.004629  |
| 6                                                            | 2.033896  | -0.937192 | 0.005616  |
| 16                                                           |           |           |           |
| 116.310611 Kcal/mol 5.043712 eV -101.198328 H Child_8_44.log |           |           |           |
| 6                                                            | -0.399138 | 2.314698  | -0.241997 |
| 8                                                            | -5.236427 | 0.279675  | -1.483693 |
| 6                                                            | -1.075547 | 1.250742  | -0.191606 |
| 6                                                            | -4.980106 | 0.406249  | -0.350337 |
| 6                                                            | -1.513459 | -0.052470 | -0.132206 |
| 6                                                            | 2.431976  | -0.192455 | -0.033974 |
| 12                                                           | 1.558239  | 1.709855  | -0.115477 |
| 6                                                            | -4.710057 | 0.521371  | 0.911486  |
| 8                                                            | 6.017143  | 0.814921  | 0.083906  |
| 6                                                            | 2.253874  | -1.560102 | 0.038919  |
| 6                                                            | 4.849875  | 0.605034  | 0.074995  |
| 6                                                            | 1.867442  | -2.790900 | 0.083426  |
| 6                                                            | 3.529191  | 0.639091  | -0.009303 |
| 6                                                            | -1.688617 | -1.289508 | -0.102192 |
| 6                                                            | -4.345562 | 0.555493  | 2.142019  |
| 12                                                           | -0.188652 | -2.643206 | -0.045947 |
| 16                                                           |           |           |           |
| 116.444403 Kcal/mol 5.049514 eV -101.198114 H Child_2_48.log |           |           |           |
| 6                                                            | 0.482951  | -1.771873 | -0.385709 |
| 6                                                            | -1.720863 | 5.329228  | 0.192491  |
| 8                                                            | 1.201784  | -2.866089 | -0.476040 |
| 8                                                            | -1.919340 | 4.574040  | -0.652371 |

|                                                              |           |           |           |
|--------------------------------------------------------------|-----------|-----------|-----------|
| 6                                                            | -0.918840 | -1.626896 | -0.545643 |
| 6                                                            | 2.213894  | 1.469766  | 0.471995  |
| 12                                                           | -8.267225 | -1.966440 | 0.547368  |
| 12                                                           | 2.986701  | -1.910476 | -0.050203 |
| 6                                                            | 1.001567  | 0.789572  | 0.136288  |
| 6                                                            | -1.666885 | -0.617406 | -0.514707 |
| 6                                                            | 3.415650  | 1.204589  | 0.613707  |
| 6                                                            | -1.391426 | 0.671001  | -0.265829 |
| 6                                                            | 1.239046  | -0.581969 | -0.067227 |
| 6                                                            | 4.812237  | -0.923571 | 0.338738  |
| 6                                                            | -0.329862 | 1.291082  | -0.012559 |
| 6                                                            | 4.380318  | 0.243040  | 0.548672  |
| 16                                                           |           |           |           |
| 116.474248 Kcal/mol 5.050808 eV -101.198067 H Child_4_39.log |           |           |           |
| 8                                                            | -6.465094 | -0.689359 | 0.652993  |
| 8                                                            | 4.057150  | 2.088969  | 1.481582  |
| 6                                                            | -5.285318 | -0.544326 | 0.477211  |
| 6                                                            | 3.717583  | 1.064165  | 0.974809  |
| 6                                                            | -4.021827 | -0.478856 | 0.349801  |
| 6                                                            | -2.777944 | -0.070207 | 0.040178  |
| 6                                                            | 3.468371  | -0.062177 | 0.376090  |
| 6                                                            | -2.424844 | 1.143329  | -0.661624 |
| 12                                                           | 0.152317  | 1.529571  | -1.045966 |
| 6                                                            | -1.549421 | -0.734199 | 0.326443  |
| 6                                                            | 2.247446  | -0.800514 | 0.108849  |
| 6                                                            | -1.821792 | 2.087936  | -1.222292 |
| 6                                                            | 0.941958  | -0.263626 | -0.129573 |
| 6                                                            | -0.306419 | -0.727561 | 0.211156  |
| 6                                                            | 2.145538  | -2.129642 | -0.253383 |
| 12                                                           | 4.286313  | -1.704805 | -0.675916 |
| 16                                                           |           |           |           |
| 116.534474 Kcal/mol 5.053419 eV -101.197971 H Child_12_9.log |           |           |           |
| 8                                                            | -4.096029 | -1.290407 | 0.976212  |
| 6                                                            | 4.238041  | -0.000374 | 0.101714  |
| 6                                                            | -3.050142 | -1.036132 | 0.357041  |
| 6                                                            | 3.671372  | 1.107251  | 0.332891  |
| 6                                                            | -1.890834 | -1.858593 | 0.269103  |
| 6                                                            | 3.007214  | 2.239691  | 0.598643  |
| 6                                                            | -3.452383 | 1.477276  | -0.264524 |
| 6                                                            | 1.728807  | 2.591607  | 0.440707  |
| 6                                                            | -0.757597 | -2.323445 | 0.185665  |
| 12                                                           | 3.509220  | -1.843769 | -0.302900 |
| 12                                                           | -1.261447 | 2.313965  | -0.387345 |
| 6                                                            | -2.882217 | 0.274455  | -0.292157 |
| 6                                                            | 1.715995  | -2.801477 | -0.386864 |
| 6                                                            | 0.534877  | -2.670356 | -0.058140 |
| 6                                                            | 0.533627  | 2.985278  | 0.316344  |
| 8                                                            | -1.823200 | 0.596226  | -1.141164 |
| 16                                                           |           |           |           |
| 116.558461 Kcal/mol 5.054460 eV -101.197933 H MutD_14_44.log |           |           |           |
| 6                                                            | 0.333095  | -2.570590 | 0.542731  |
| 6                                                            | -4.227313 | -1.534886 | -0.560094 |
| 6                                                            | 1.300419  | -0.193966 | 0.772400  |
| 6                                                            | -3.270609 | -2.318154 | -0.305447 |
| 6                                                            | 0.346152  | 2.179271  | 0.578068  |

|                                                              |           |           |           |
|--------------------------------------------------------------|-----------|-----------|-----------|
| 6                                                            | 5.561098  | -1.784746 | -0.104275 |
| 12                                                           | -4.017721 | 0.505992  | -0.471671 |
| 6                                                            | -0.921160 | -2.887119 | 0.275713  |
| 6                                                            | 0.892927  | -1.397562 | 0.703567  |
| 6                                                            | 0.922534  | 1.088672  | 0.708170  |
| 6                                                            | 4.943442  | -0.685047 | -0.345868 |
| 12                                                           | -2.282308 | 2.749349  | -0.011995 |
| 6                                                            | 4.337569  | 0.425981  | -0.615325 |
| 8                                                            | 3.822835  | 1.442728  | -0.885417 |
| 8                                                            | -0.431166 | 3.184003  | 0.400958  |
| 6                                                            | -2.140321 | -3.001510 | -0.036363 |
| 16                                                           |           |           |           |
| 116.781835 Kcal/mol 5.064146 eV -101.197577 H Child_6_52.log |           |           |           |
| 8                                                            | 4.714796  | 1.172064  | 0.934161  |
| 8                                                            | -4.209326 | 1.548614  | 1.041857  |
| 6                                                            | 3.744180  | 0.547690  | 0.630108  |
| 6                                                            | -3.311638 | 1.294550  | 0.375287  |
| 6                                                            | 2.670412  | -0.129674 | 0.353713  |
| 12                                                           | -1.832639 | -1.800411 | 0.795239  |
| 6                                                            | 0.419125  | 0.640208  | -2.088625 |
| 12                                                           | -1.076820 | 1.311365  | -0.311325 |
| 6                                                            | 0.754604  | -0.636109 | -1.510753 |
| 6                                                            | -0.847633 | -0.029008 | 1.438260  |
| 6                                                            | 1.689210  | -0.744264 | -0.501001 |
| 6                                                            | -0.327903 | -1.556906 | -1.360530 |
| 6                                                            | 0.342610  | -0.522554 | 1.449989  |
| 6                                                            | -1.294261 | -2.325666 | -1.109295 |
| 6                                                            | -0.216670 | 1.726168  | -2.189714 |
| 6                                                            | 1.522924  | -0.913914 | 0.910042  |
| 16                                                           |           |           |           |
| 116.895035 Kcal/mol 5.069055 eV -101.197396 H Child_3_40.log |           |           |           |
| 6                                                            | -3.796742 | -1.043008 | 0.490541  |
| 6                                                            | 4.005947  | -1.017446 | 0.434780  |
| 6                                                            | -3.546824 | -0.017937 | -0.450246 |
| 12                                                           | 2.704462  | -1.625478 | -1.023729 |
| 6                                                            | -4.795343 | -0.712684 | -0.532842 |
| 6                                                            | 3.228886  | -0.054930 | 0.689187  |
| 6                                                            | -2.514913 | 0.843414  | -0.756553 |
| 6                                                            | 2.161001  | 0.830387  | 0.604056  |
| 12                                                           | -1.801084 | -0.785780 | 1.213429  |
| 6                                                            | 0.769917  | 2.526376  | -0.074256 |
| 6                                                            | -1.395754 | 1.377428  | -0.753743 |
| 6                                                            | 1.926639  | 2.141974  | 0.435755  |
| 6                                                            | 0.756977  | 0.117610  | 0.016925  |
| 8                                                            | 0.021126  | -0.540689 | 0.990487  |
| 6                                                            | -0.058353 | 1.520860  | -0.438905 |
| 8                                                            | 1.067727  | -0.726458 | -1.023562 |
| 16                                                           |           |           |           |
| 116.930755 Kcal/mol 5.070604 eV -101.197339 H MutD_11_70.log |           |           |           |
| 6                                                            | 1.963750  | 1.891827  | -0.318803 |
| 6                                                            | -3.873796 | -0.951661 | -0.989650 |
| 6                                                            | -0.598437 | -0.374824 | -0.082229 |
| 8                                                            | 3.260376  | 2.088513  | -0.452043 |
| 6                                                            | -2.739675 | 1.934406  | 1.030049  |
| 6                                                            | -1.397807 | -1.445842 | -0.209593 |

|    |           |           |           |
|----|-----------|-----------|-----------|
| 6  | 0.795816  | 1.595749  | -0.134729 |
| 6  | -0.421417 | 0.954460  | 0.183365  |
| 6  | 3.552040  | -0.191561 | -0.055764 |
| 6  | -2.696566 | -1.317965 | -0.746174 |
| 6  | 2.951285  | -1.244207 | 0.192113  |
| 12 | -4.111481 | 0.827150  | -0.003720 |
| 6  | -1.570295 | 1.578567  | 0.767012  |
| 12 | 0.346129  | -2.418890 | 0.352208  |
| 6  | 4.248153  | 0.981148  | -0.312374 |
| 8  | 2.227865  | -2.258477 | 0.436896  |

16

117.551965 Kcal/mol 5.097542 eV -101.196349 H Child\_8\_58.log

|    |           |           |           |
|----|-----------|-----------|-----------|
| 6  | -6.401428 | 0.274567  | -0.125028 |
| 8  | 3.892368  | 2.744685  | -0.686545 |
| 8  | -1.084480 | -3.084723 | -0.216695 |
| 6  | 2.853907  | 2.272087  | -0.344436 |
| 6  | 3.098958  | -1.478404 | 0.666777  |
| 6  | -5.109587 | 0.353316  | -0.090022 |
| 6  | 1.665635  | 1.803286  | -0.050938 |
| 6  | -3.797590 | 0.386058  | -0.114530 |
| 12 | 2.294196  | -3.201465 | -0.096877 |
| 6  | -2.538694 | 0.422622  | -0.099059 |
| 6  | 2.276865  | -0.571237 | 0.405279  |
| 6  | -0.009806 | 0.031952  | 0.015560  |
| 12 | -0.250060 | 2.606617  | 0.550015  |
| 6  | -1.223151 | 0.539640  | 0.033884  |
| 6  | 1.315801  | 0.416956  | 0.111724  |
| 6  | 0.036967  | -2.807765 | -0.111165 |

16

117.558863 Kcal/mol 5.097841 eV -101.196338 H Original3D\_8\_7.log

|    |           |           |           |
|----|-----------|-----------|-----------|
| 6  | 2.132442  | -1.611831 | -0.148915 |
| 6  | 1.128098  | -2.336120 | -0.254010 |
| 6  | -0.690069 | 1.537919  | 0.465123  |
| 6  | -0.093022 | -2.918821 | -0.369430 |
| 6  | -1.283325 | -3.283588 | -0.467335 |
| 8  | -1.616607 | 0.718250  | 1.220633  |
| 6  | -0.981957 | 2.699826  | -0.051778 |
| 12 | -3.080677 | -2.336957 | -0.396704 |
| 12 | 1.229426  | 0.639143  | 0.410444  |
| 8  | 5.312643  | 0.285575  | -0.040324 |
| 6  | -1.194432 | 5.100077  | -1.025178 |
| 6  | -3.660592 | -0.462638 | 0.166152  |
| 6  | 2.959917  | -0.505794 | 0.058029  |
| 6  | 4.208470  | -0.163116 | -0.012691 |
| 6  | -2.658454 | 0.122622  | 0.631544  |
| 6  | -1.092619 | 3.878659  | -0.592737 |

16

117.656576 Kcal/mol 5.102078 eV -101.196183 H Child\_4\_37.log

|   |           |           |           |
|---|-----------|-----------|-----------|
| 8 | 4.508542  | 1.219189  | -1.588191 |
| 6 | -4.818251 | -0.683376 | -1.319125 |
| 6 | 3.682340  | 0.812345  | -0.842715 |
| 6 | -3.647594 | -0.347545 | -0.753948 |
| 6 | 2.820044  | 0.203283  | -0.078076 |
| 6 | -3.271444 | 0.997777  | -0.445810 |
| 6 | 2.902957  | -1.749861 | -0.324156 |



|                                                               |           |           |           |
|---------------------------------------------------------------|-----------|-----------|-----------|
| 6                                                             | -2.756138 | 2.071060  | -0.109251 |
| 6                                                             | 1.717530  | 0.597118  | 0.637337  |
| 6                                                             | -2.713913 | -1.381517 | -0.412943 |
| 6                                                             | 0.667338  | 1.442258  | 1.045400  |
| 12                                                            | -1.000933 | 2.614821  | 0.693751  |
| 6                                                             | 0.589003  | 0.058877  | 1.326768  |
| 6                                                             | -1.789022 | -2.097888 | -0.008812 |
| 12                                                            | 0.045905  | -1.927279 | 0.863184  |
| 8                                                             | 1.886860  | -2.192399 | 0.216788  |
| 16                                                            |           |           |           |
| 118.021563 Kcal/mol 5.117906 eV -101.195601 H Child_10_8.log  |           |           |           |
| 8                                                             | 5.759067  | 0.566810  | 0.994989  |
| 6                                                             | -4.388797 | 2.472822  | 0.776199  |
| 6                                                             | 4.682993  | 0.719087  | 0.494315  |
| 8                                                             | -4.227264 | -0.018136 | 0.673969  |
| 6                                                             | 3.467256  | 0.688908  | 0.037572  |
| 6                                                             | -3.766582 | 1.336483  | 0.423839  |
| 6                                                             | 1.226856  | 1.644943  | -0.834025 |
| 6                                                             | -3.010433 | -0.495912 | -0.007637 |
| 12                                                            | 2.164038  | -0.986675 | -0.280239 |
| 6                                                             | -2.568903 | 0.785453  | -0.255362 |
| 6                                                             | 0.713220  | -2.409837 | -0.186214 |
| 12                                                            | -1.813519 | -2.230896 | -0.153792 |
| 6                                                             | 2.423858  | 1.462774  | -0.468367 |
| 6                                                             | -1.306792 | 1.250276  | -0.696051 |
| 6                                                             | -0.103802 | -3.300881 | 0.241790  |
| 6                                                             | -0.112317 | 1.549461  | -0.883274 |
| 16                                                            |           |           |           |
| 118.053638 Kcal/mol 5.119297 eV -101.195550 H Child_14_12.log |           |           |           |
| 6                                                             | -3.934226 | 0.146731  | -0.513269 |
| 6                                                             | 1.786262  | -0.230279 | 1.593082  |
| 6                                                             | -3.176380 | -0.874201 | -0.496040 |
| 6                                                             | 1.190311  | 0.816009  | 1.861452  |
| 6                                                             | -1.953634 | -1.554457 | -0.435493 |
| 6                                                             | 3.793822  | 0.618900  | -1.487721 |
| 8                                                             | -0.962741 | -0.654627 | -0.184306 |
| 6                                                             | 2.000345  | -1.444401 | 1.018924  |
| 12                                                            | -0.043653 | -2.483709 | -0.151816 |
| 6                                                             | 2.567368  | 1.022786  | -1.446855 |
| 6                                                             | -0.850097 | 2.330668  | 1.457981  |
| 6                                                             | 0.200556  | 1.745738  | 1.805457  |
| 6                                                             | 1.946668  | -2.539563 | 0.408417  |
| 6                                                             | 1.316852  | 1.322257  | -1.413728 |
| 8                                                             | 0.165081  | 1.573550  | -1.423970 |
| 12                                                            | -1.868497 | 1.190999  | 0.047897  |
| 16                                                            |           |           |           |
| 118.152138 Kcal/mol 5.123568 eV -101.195393 H Child_6_46.log  |           |           |           |
| 6                                                             | -2.878782 | -2.035899 | -0.012258 |
| 8                                                             | 6.682950  | 0.135392  | 0.026981  |
| 6                                                             | -3.951953 | -1.432080 | 0.025058  |
| 6                                                             | 5.491887  | -0.028119 | 0.036005  |
| 6                                                             | -1.567308 | -2.335317 | -0.045611 |
| 6                                                             | 1.320278  | 1.914020  | 0.017589  |
| 8                                                             | -4.969048 | -0.643647 | 0.068560  |
| 6                                                             | 2.154712  | 0.999229  | 0.028671  |

|                                                               |           |           |           |
|---------------------------------------------------------------|-----------|-----------|-----------|
| 6                                                             | -0.332370 | -2.347230 | -0.065405 |
| 6                                                             | 4.250527  | -0.300290 | 0.036992  |
| 6                                                             | 0.954110  | -1.953093 | -0.053220 |
| 6                                                             | 2.906328  | -0.223939 | 0.013797  |
| 12                                                            | -4.392169 | 1.184136  | 0.087019  |
| 12                                                            | -0.603870 | 2.565300  | -0.024683 |
| 6                                                             | 2.016467  | -1.330479 | -0.028084 |
| 6                                                             | -2.657020 | 2.251998  | -0.205594 |
| 16                                                            |           |           |           |
| 118.323293 Kcal/mol 5.130990 eV -101.195120 H Child_14_29.log |           |           |           |
| 6                                                             | 1.797510  | 2.451201  | -0.187143 |
| 6                                                             | 1.085200  | -2.338072 | -0.055782 |
| 12                                                            | -0.229912 | 2.523624  | 0.110779  |
| 6                                                             | -0.127655 | -2.347624 | -0.304448 |
| 6                                                             | 2.814841  | 1.748477  | -0.218452 |
| 12                                                            | 3.077378  | -1.804188 | 0.007586  |
| 6                                                             | -2.145392 | 2.056679  | -0.724037 |
| 8                                                             | -1.417437 | -1.944525 | -0.393533 |
| 6                                                             | 3.743297  | 0.744710  | -0.196381 |
| 6                                                             | -1.888714 | -0.925641 | 0.354877  |
| 6                                                             | -2.832507 | 1.022921  | -0.642847 |
| 6                                                             | -1.189387 | -0.322742 | 1.353456  |
| 6                                                             | 4.424060  | -0.310746 | -0.182270 |
| 6                                                             | -0.605566 | 0.789587  | 1.514957  |
| 8                                                             | -4.269645 | -0.854115 | -0.171047 |
| 6                                                             | -3.187842 | -0.276102 | -0.195887 |
| 16                                                            |           |           |           |
| 118.595943 Kcal/mol 5.142813 eV -101.194686 H Child_13_21.log |           |           |           |
| 6                                                             | 1.558439  | -1.822050 | 2.461780  |
| 8                                                             | -4.672376 | 0.585985  | 1.102856  |
| 8                                                             | 1.614711  | -1.726874 | 1.304351  |
| 6                                                             | -1.748004 | 2.213093  | -0.295687 |
| 6                                                             | -0.056666 | -2.696226 | -1.289923 |
| 6                                                             | -2.825815 | 1.722931  | 0.052449  |
| 12                                                            | 1.503584  | -1.457171 | -0.809889 |
| 6                                                             | -3.627178 | 0.593365  | 0.432132  |
| 12                                                            | 4.815530  | 1.416730  | 0.187537  |
| 6                                                             | -1.130572 | -2.124751 | -1.016176 |
| 6                                                             | -0.427800 | 2.168556  | -0.659107 |
| 6                                                             | 1.747616  | 0.617690  | -0.551983 |
| 6                                                             | -2.170486 | -1.364735 | -0.589375 |
| 6                                                             | -2.950622 | -0.585033 | -0.047102 |
| 6                                                             | 0.594609  | 1.428748  | -0.659261 |
| 6                                                             | 2.475135  | 1.450482  | 0.197347  |
| 16                                                            |           |           |           |
| 119.122366 Kcal/mol 5.165641 eV -101.193847 H Child_6_57.log  |           |           |           |
| 6                                                             | -3.196486 | -1.377461 | 1.508289  |
| 8                                                             | 2.996635  | 1.337496  | 1.732074  |
| 8                                                             | 8.002815  | -1.180403 | -0.748510 |
| 6                                                             | -0.958568 | 2.352187  | -0.660484 |
| 6                                                             | -1.957291 | -1.485308 | 1.708506  |
| 12                                                            | -3.014405 | 2.016606  | -0.902486 |
| 6                                                             | 7.813852  | -0.107870 | -1.072297 |
| 6                                                             | 0.011860  | 1.783547  | -0.123333 |
| 12                                                            | -4.095701 | -0.578691 | -0.355206 |

|                                                              |           |           |           |
|--------------------------------------------------------------|-----------|-----------|-----------|
| 6                                                            | 1.984645  | 1.099751  | 1.169088  |
| 6                                                            | -2.587709 | -1.497544 | -1.740410 |
| 6                                                            | 0.845943  | 0.823772  | 0.523707  |
| 6                                                            | -0.761802 | -1.288875 | 1.072751  |
| 6                                                            | -1.386376 | -1.558386 | -1.354178 |
| 6                                                            | 0.253466  | -0.512391 | 0.510741  |
| 6                                                            | -0.507256 | -1.316712 | -0.338414 |
| 16                                                           |           |           |           |
| 119.213803 Kcal/mol 5.169606 eV -101.193701 H MutD_13_42.log |           |           |           |
| 12                                                           | -2.619892 | 2.935011  | 0.264362  |
| 6                                                            | -4.037775 | 1.469115  | 0.619687  |
| 6                                                            | -3.831760 | -1.130286 | 0.393304  |
| 6                                                            | -0.829916 | -1.510609 | -0.587146 |
| 6                                                            | 0.107760  | -0.729601 | -0.707054 |
| 6                                                            | -4.270915 | -2.556786 | 0.474977  |
| 6                                                            | 1.049394  | 0.314697  | -0.692826 |
| 6                                                            | 2.357020  | 0.131609  | -0.512629 |
| 8                                                            | -1.729914 | -2.473704 | -0.346387 |
| 8                                                            | 7.185698  | -0.434474 | 0.818330  |
| 6                                                            | 4.825738  | -0.158030 | 0.114896  |
| 6                                                            | 3.590334  | -0.007765 | -0.220379 |
| 12                                                           | -0.008933 | 2.193236  | -0.554480 |
| 6                                                            | -2.988488 | -2.117974 | 0.054477  |
| 6                                                            | -4.025212 | 0.228139  | 0.538846  |
| 6                                                            | 6.037089  | -0.311431 | 0.474823  |
| 16                                                           |           |           |           |
| 119.379088 Kcal/mol 5.176774 eV -101.193438 H Child_8_51.log |           |           |           |
| 8                                                            | -4.012832 | 1.627065  | -0.006175 |
| 6                                                            | 3.763581  | 1.048510  | 0.397941  |
| 12                                                           | -1.330361 | -1.677045 | -0.628103 |
| 12                                                           | 1.491931  | 2.652688  | -0.032467 |
| 8                                                            | -3.750195 | -0.946989 | 1.348657  |
| 6                                                            | 3.476039  | 2.265429  | 0.182834  |
| 6                                                            | -2.975551 | -0.579056 | 0.476876  |
| 6                                                            | 4.006448  | -0.273632 | 0.436481  |
| 6                                                            | 0.169127  | -3.121414 | -0.493998 |
| 6                                                            | -0.341436 | 1.721190  | -0.481673 |
| 6                                                            | -2.966261 | 0.978892  | 0.069456  |
| 6                                                            | 1.347747  | -2.841304 | -0.132759 |
| 6                                                            | -0.666390 | 0.407972  | -0.971499 |
| 6                                                            | -1.656761 | 1.278569  | -0.459046 |
| 6                                                            | 3.294334  | -1.352793 | 0.368108  |
| 6                                                            | 2.576686  | -2.390420 | 0.138442  |
| 16                                                           |           |           |           |
| 119.493900 Kcal/mol 5.181752 eV -101.193255 H MutD_8_76.log  |           |           |           |
| 6                                                            | 0.580003  | -0.339693 | -1.543925 |
| 6                                                            | 2.309438  | 0.614498  | -0.218686 |
| 12                                                           | 0.641305  | 2.046395  | -0.442661 |
| 6                                                            | -1.958052 | -3.005628 | 0.651009  |
| 6                                                            | -3.289896 | 3.134420  | 1.333332  |
| 6                                                            | 1.710080  | -0.563713 | -0.786029 |
| 6                                                            | -1.530088 | 1.918749  | -0.208649 |
| 6                                                            | 3.383028  | 0.759677  | 0.520443  |
| 6                                                            | -2.359032 | -0.535612 | -0.179479 |
| 8                                                            | -0.639746 | -3.229401 | 0.640087  |

|                                                              |           |           |           |
|--------------------------------------------------------------|-----------|-----------|-----------|
| 8                                                            | 4.316577  | 1.022173  | 1.207257  |
| 12                                                           | 0.949665  | -2.366431 | 0.085839  |
| 6                                                            | -0.590715 | 0.156004  | -1.511659 |
| 6                                                            | -2.240197 | -1.639947 | 0.372151  |
| 6                                                            | -1.661021 | 0.567314  | -0.757059 |
| 6                                                            | -2.437929 | 2.516976  | 0.579070  |
| 16                                                           |           |           |           |
| 119.535227 Kcal/mol 5.183545 eV -101.193189 H Child_7_62.log |           |           |           |
| 8                                                            | 3.982383  | -2.426452 | 0.483306  |
| 12                                                           | -4.783950 | 0.194370  | 0.561944  |
| 6                                                            | 2.976298  | -1.728161 | 0.175504  |
| 6                                                            | -3.019661 | 1.544838  | 0.119060  |
| 6                                                            | 2.954005  | -0.277527 | 0.098104  |
| 6                                                            | -2.298426 | 0.370928  | -0.390579 |
| 6                                                            | 1.710543  | -2.193091 | -0.144343 |
| 12                                                           | -2.758734 | -1.744780 | -0.297804 |
| 6                                                            | 2.742451  | 0.925632  | 0.048253  |
| 6                                                            | -1.644139 | 1.568908  | -0.150753 |
| 6                                                            | 0.451721  | -2.466239 | -0.221376 |
| 6                                                            | -0.823717 | -2.492051 | -0.345817 |
| 6                                                            | 2.276738  | 2.278154  | -0.041589 |
| 6                                                            | -0.370583 | 2.104095  | -0.114030 |
| 6                                                            | 0.830702  | 2.315555  | -0.076302 |
| 8                                                            | 2.992196  | 3.288787  | -0.096614 |
| 16                                                           |           |           |           |
| 119.548130 Kcal/mol 5.184104 eV -101.193168 H Child_6_24.log |           |           |           |
| 12                                                           | -6.485941 | -0.831946 | -0.174825 |
| 6                                                            | 4.623475  | 1.364961  | 0.089001  |
| 8                                                            | -0.947834 | 0.875175  | -1.289372 |
| 6                                                            | 3.503578  | 0.642805  | -0.029215 |
| 6                                                            | -0.339873 | 1.537884  | -0.357592 |
| 8                                                            | 4.673111  | -1.468961 | 0.048480  |
| 12                                                           | -2.533195 | 0.092447  | -0.046697 |
| 6                                                            | -1.190184 | 1.938394  | 0.699214  |
| 6                                                            | 3.573876  | -0.902526 | 0.018881  |
| 6                                                            | -2.230580 | 1.852260  | 1.413192  |
| 6                                                            | 2.306770  | -1.534450 | 0.067650  |
| 6                                                            | 1.075291  | 1.589157  | -0.328392 |
| 6                                                            | -1.410908 | -1.607661 | 0.302142  |
| 6                                                            | -0.219615 | -1.981039 | 0.261917  |
| 6                                                            | 1.133907  | -1.888540 | 0.162554  |
| 6                                                            | 2.245498  | 1.259466  | -0.201786 |
| 16                                                           |           |           |           |
| 119.753951 Kcal/mol 5.193029 eV -101.192840 H Child_8_8.log  |           |           |           |
| 6                                                            | 5.467843  | -0.732522 | -2.057256 |
| 6                                                            | 0.710587  | 2.956208  | 0.617739  |
| 6                                                            | 4.612572  | -0.886082 | -1.064526 |
| 6                                                            | 1.386571  | 1.985668  | 1.027364  |
| 6                                                            | 0.075312  | -1.870900 | 0.569976  |
| 6                                                            | -3.316025 | 0.022359  | -0.596552 |
| 8                                                            | -3.068708 | -3.507597 | 0.080002  |
| 6                                                            | -3.217045 | 1.364589  | -0.790184 |
| 6                                                            | -1.089760 | -2.203075 | 0.318318  |
| 6                                                            | -2.855244 | 2.549457  | -0.852846 |
| 6                                                            | 3.635904  | -1.027423 | -0.244933 |

|                                                              |           |           |           |
|--------------------------------------------------------------|-----------|-----------|-----------|
| 6                                                            | -3.105373 | -1.159535 | -0.346899 |
| 12                                                           | 1.817026  | -0.874025 | 0.966101  |
| 8                                                            | 2.051856  | 0.947695  | 1.388973  |
| 6                                                            | -2.484494 | -2.409432 | 0.014237  |
| 12                                                           | -1.049549 | 3.285970  | -0.242637 |
| 16                                                           |           |           |           |
| 119.760994 Kcal/mol 5.193335 eV -101.192829 H Child_8_26.log |           |           |           |
| 8                                                            | -4.035114 | -3.795254 | 0.078625  |
| 6                                                            | 6.716900  | -0.909728 | 0.814557  |
| 6                                                            | -3.599514 | -2.698868 | -0.009781 |
| 6                                                            | 7.253493  | -0.476978 | -0.268403 |
| 6                                                            | -3.307188 | -0.214687 | -0.114501 |
| 6                                                            | 3.083260  | 0.352723  | -0.341338 |
| 8                                                            | -3.507373 | 3.411337  | 0.033902  |
| 12                                                           | 5.114167  | -0.034362 | -0.214788 |
| 6                                                            | -3.316746 | 1.019314  | -0.107350 |
| 6                                                            | -2.838880 | 2.367322  | 0.047772  |
| 6                                                            | 1.854301  | 0.492928  | -0.129486 |
| 6                                                            | -2.959632 | -1.560961 | -0.082407 |
| 6                                                            | -0.355246 | 1.593679  | 0.215633  |
| 6                                                            | -1.395234 | 2.270109  | 0.205223  |
| 6                                                            | 0.505578  | 0.527787  | 0.054030  |
| 12                                                           | -0.906388 | -1.091013 | -0.002204 |
| 16                                                           |           |           |           |
| 120.169648 Kcal/mol 5.211056 eV -101.192178 H MutD_18_44.log |           |           |           |
| 6                                                            | 6.748517  | -0.221594 | -0.043513 |
| 6                                                            | 4.193691  | 0.009253  | 0.026208  |
| 8                                                            | 7.940709  | -0.365826 | -0.091364 |
| 6                                                            | -2.068478 | -1.782472 | 0.031981  |
| 6                                                            | -4.161658 | 1.424249  | -0.026875 |
| 6                                                            | -1.714766 | 2.106198  | 0.007538  |
| 6                                                            | 2.931275  | 0.126409  | 0.046407  |
| 6                                                            | -0.417701 | 1.778826  | 0.028186  |
| 6                                                            | 1.604882  | 0.152234  | 0.059375  |
| 12                                                           | -4.118475 | -1.774155 | -0.021143 |
| 12                                                           | -0.053870 | -1.248866 | 0.067412  |
| 6                                                            | 0.677814  | 1.179622  | 0.045742  |
| 8                                                            | -5.673973 | -0.578826 | -0.061224 |
| 6                                                            | 5.495731  | -0.005406 | -0.005743 |
| 6                                                            | -5.017137 | 0.531987  | -0.046921 |
| 6                                                            | -2.949795 | 2.006273  | -0.011470 |
| 16                                                           |           |           |           |
| 120.653954 Kcal/mol 5.232057 eV -101.191406 H Child_7_40.log |           |           |           |
| 8                                                            | 4.703148  | -0.366661 | -0.842192 |
| 6                                                            | -2.353725 | -4.073774 | -1.112485 |
| 6                                                            | 3.629162  | -0.166103 | -0.365664 |
| 6                                                            | -2.645972 | 1.166903  | -0.382511 |
| 6                                                            | 2.430134  | -0.080052 | 0.144956  |
| 6                                                            | -1.821168 | -3.073483 | -0.484405 |
| 12                                                           | 1.045528  | -1.788203 | 0.387960  |
| 6                                                            | -2.536931 | 0.040823  | 0.153194  |
| 6                                                            | 1.558890  | 0.993924  | 0.569904  |
| 6                                                            | -2.645290 | 2.572101  | -0.419327 |
| 12                                                           | 0.388572  | 2.593356  | -0.244023 |
| 6                                                            | -0.591645 | -0.173353 | 1.344652  |

|                                                              |           |           |           |
|--------------------------------------------------------------|-----------|-----------|-----------|
| 6                                                            | 0.460020  | 0.527014  | 1.223377  |
| 6                                                            | -1.118088 | -2.165065 | 0.204299  |
| 8                                                            | -1.448216 | 3.126489  | -0.542112 |
| 6                                                            | -1.573496 | -0.859011 | 0.681875  |
| 16                                                           |           |           |           |
| 120.655197 Kcal/mol 5.232111 eV -101.191404 H MutD_17_42.log |           |           |           |
| 6                                                            | 1.572859  | 0.262083  | 0.034260  |
| 12                                                           | -0.072404 | -1.137612 | 0.221548  |
| 12                                                           | -4.013081 | -1.858952 | -0.181766 |
| 6                                                            | -1.752152 | 2.193182  | 0.065486  |
| 8                                                            | 7.890978  | -0.461117 | -0.114424 |
| 6                                                            | 0.654560  | 1.299882  | 0.031589  |
| 6                                                            | -4.153076 | 1.374836  | 0.007412  |
| 6                                                            | 4.156980  | 0.037217  | -0.039638 |
| 6                                                            | -4.958093 | 0.440956  | -0.090091 |
| 6                                                            | -0.442510 | 1.894910  | 0.042672  |
| 8                                                            | -5.574817 | -0.684438 | -0.245259 |
| 6                                                            | 6.699233  | -0.292832 | -0.091903 |
| 6                                                            | 5.443673  | -0.096159 | -0.071690 |
| 6                                                            | -2.052376 | -1.814464 | 0.475288  |
| 6                                                            | 2.891845  | 0.206862  | -0.025129 |
| 6                                                            | -2.978190 | 2.014062  | 0.061758  |
| 16                                                           |           |           |           |
| 121.078612 Kcal/mol 5.250472 eV -101.190729 H Child_7_60.log |           |           |           |
| 6                                                            | -4.456672 | -0.555079 | 0.029252  |
| 6                                                            | 1.705163  | 2.382494  | -0.359023 |
| 6                                                            | -3.968588 | -1.668513 | -0.169318 |
| 12                                                           | 3.207614  | 0.983854  | -0.077353 |
| 6                                                            | -2.771232 | -2.303557 | -0.289855 |
| 6                                                            | 0.477465  | 2.595154  | -0.190118 |
| 6                                                            | -4.149445 | 0.760085  | 0.217380  |
| 6                                                            | 4.709170  | -0.528301 | -0.153690 |
| 6                                                            | -1.532654 | -2.342072 | -0.321973 |
| 6                                                            | 3.811811  | -1.392241 | 0.038235  |
| 6                                                            | -3.268289 | 1.627026  | 0.251629  |
| 6                                                            | -0.870545 | 2.544743  | -0.010223 |
| 6                                                            | -2.051545 | 2.232073  | 0.134558  |
| 12                                                           | 0.051661  | -1.139056 | 0.042899  |
| 8                                                            | 2.620135  | -1.872854 | 0.308341  |
| 8                                                            | 1.764971  | -0.408202 | 0.360699  |
| 16                                                           |           |           |           |
| 121.203053 Kcal/mol 5.255868 eV -101.190531 H MutD_15_56.log |           |           |           |
| 6                                                            | 0.503881  | -1.355524 | -0.027678 |
| 6                                                            | -5.010866 | 1.918891  | 0.094186  |
| 8                                                            | -5.573164 | 2.963110  | 0.146967  |
| 12                                                           | -1.603255 | -0.623398 | -0.553407 |
| 6                                                            | -3.704222 | -0.309873 | -0.049525 |
| 6                                                            | 3.408749  | 0.489720  | 0.185444  |
| 6                                                            | -4.350935 | 0.791226  | 0.041090  |
| 6                                                            | 2.151185  | 0.495654  | 0.182558  |
| 6                                                            | 0.888371  | 0.049670  | -0.058450 |
| 6                                                            | 5.970755  | 0.390410  | 0.205254  |
| 6                                                            | -0.254330 | -2.297944 | -0.378306 |
| 8                                                            | -0.170670 | 0.782014  | -0.452089 |
| 6                                                            | 8.548866  | 0.097920  | -0.004330 |

|                                                              |           |           |           |
|--------------------------------------------------------------|-----------|-----------|-----------|
| 12                                                           | -4.639160 | -2.382601 | 0.489212  |
| 6                                                            | 7.274936  | 0.243115  | 0.136888  |
| 6                                                            | 4.716886  | 0.505237  | 0.208088  |
| 16                                                           |           |           |           |
| 121.310717 Kcal/mol 5.260537 eV -101.190360 H MutI_13_63.log |           |           |           |
| 6                                                            | 0.432347  | 3.432017  | 0.138361  |
| 6                                                            | -1.164625 | 0.810615  | 1.759548  |
| 8                                                            | -2.419831 | -2.157298 | -1.166130 |
| 6                                                            | -4.403707 | 0.998754  | -0.994304 |
| 12                                                           | 2.933234  | -2.179074 | -0.207033 |
| 6                                                            | 1.561505  | 3.119052  | -0.532392 |
| 6                                                            | -0.922074 | -0.427714 | 1.748406  |
| 6                                                            | 2.568173  | 2.648696  | -1.139800 |
| 6                                                            | -3.907231 | -0.190630 | -1.111428 |
| 6                                                            | 0.508114  | -2.387329 | 0.907087  |
| 6                                                            | -3.144467 | -1.237752 | -1.114033 |
| 6                                                            | -0.446349 | 2.875016  | 0.863977  |
| 12                                                           | 2.967923  | 0.610715  | -1.002737 |
| 6                                                            | -0.197018 | -1.481459 | 1.376631  |
| 8                                                            | 1.355294  | -3.192172 | 0.389701  |
| 6                                                            | -1.267603 | 2.110077  | 1.552726  |
| 16                                                           |           |           |           |
| 121.505830 Kcal/mol 5.268998 eV -101.190049 H Child_3_22.log |           |           |           |
| 6                                                            | 2.698734  | 1.610345  | 1.166071  |
| 6                                                            | -2.467505 | -1.821063 | 1.439266  |
| 6                                                            | 3.429662  | 0.930678  | 0.383135  |
| 8                                                            | -2.263752 | -0.531874 | 1.447682  |
| 6                                                            | 1.560398  | 1.962893  | 1.773341  |
| 6                                                            | -1.295833 | -2.524073 | 0.956254  |
| 6                                                            | 3.143318  | 0.186692  | -0.674337 |
| 6                                                            | -0.360045 | -2.959137 | 0.259438  |
| 6                                                            | 0.304314  | 1.888393  | 1.694260  |
| 8                                                            | -3.110020 | 2.152895  | -2.133691 |
| 6                                                            | 2.358744  | -0.556599 | -1.379618 |
| 12                                                           | -1.242800 | 0.830236  | 0.597028  |
| 6                                                            | 1.010032  | -0.091798 | -1.509667 |
| 6                                                            | -2.641470 | 1.897634  | -1.122709 |
| 6                                                            | -0.164448 | 0.232901  | -1.219773 |
| 12                                                           | 1.037365  | -2.289350 | -1.022519 |
| 16                                                           |           |           |           |
| 121.924392 Kcal/mol 5.287149 eV -101.189382 H MutD_17_34.log |           |           |           |
| 6                                                            | 3.527356  | 1.669986  | -0.076903 |
| 6                                                            | -0.244611 | -0.608002 | 0.245948  |
| 12                                                           | 4.675405  | -2.596133 | -0.252921 |
| 6                                                            | 0.986369  | -0.683321 | 0.189286  |
| 6                                                            | -2.729467 | 0.345587  | 0.627030  |
| 6                                                            | -2.916080 | -0.931736 | 0.113140  |
| 6                                                            | 4.056364  | 2.866235  | -0.233725 |
| 6                                                            | 4.553932  | 4.035700  | -0.415204 |
| 12                                                           | -5.210192 | 1.008115  | -0.256814 |
| 6                                                            | -4.095597 | -1.274988 | -0.525530 |
| 6                                                            | 2.389425  | -0.675243 | 0.189451  |
| 8                                                            | -3.482105 | 1.393269  | 0.698406  |
| 8                                                            | 3.028165  | -1.836218 | 0.310926  |
| 6                                                            | -1.585294 | -0.445782 | 0.338446  |

|                                                                   |           |           |           |
|-------------------------------------------------------------------|-----------|-----------|-----------|
| 6                                                                 | 3.036457  | 0.525597  | 0.060518  |
| 6                                                                 | -5.304028 | -1.057397 | -0.838764 |
| 16                                                                |           |           |           |
| 121.994772 Kcal/mol 5.290201 eV -101.189269 H Child_4_27.log      |           |           |           |
| 12                                                                | -3.377639 | -1.504635 | 0.510829  |
| 8                                                                 | 2.600236  | 3.428995  | 0.748815  |
| 6                                                                 | -1.654015 | -2.530024 | 1.104766  |
| 6                                                                 | 2.994932  | 2.334454  | 0.458791  |
| 8                                                                 | -5.039388 | 2.034433  | -0.906790 |
| 6                                                                 | -4.090816 | 1.411960  | -0.584714 |
| 6                                                                 | 3.218999  | 1.111763  | 0.107395  |
| 6                                                                 | -1.049744 | -1.489155 | 0.704221  |
| 6                                                                 | 3.108006  | -2.074953 | -0.758905 |
| 6                                                                 | -3.109241 | 0.644218  | -0.228986 |
| 6                                                                 | 4.066944  | 0.085913  | -0.262497 |
| 6                                                                 | -0.743732 | -0.184467 | 0.232964  |
| 6                                                                 | 1.872756  | -2.388568 | -0.868695 |
| 6                                                                 | -1.760759 | 0.527934  | -0.079642 |
| 6                                                                 | 4.099964  | -1.136267 | -0.559070 |
| 12                                                                | 1.527093  | -0.294054 | -0.038327 |
| 16                                                                |           |           |           |
| 122.045668 Kcal/mol 5.292408 eV -101.189188 H Child_6_25.log      |           |           |           |
| 12                                                                | -2.905602 | -0.134184 | 0.497464  |
| 8                                                                 | 5.764083  | 3.866295  | 0.092283  |
| 6                                                                 | -2.043001 | -1.933157 | 0.516418  |
| 6                                                                 | 5.441839  | 2.715615  | 0.016728  |
| 6                                                                 | -1.082525 | -2.674627 | 0.273291  |
| 6                                                                 | -2.217459 | 2.104989  | 0.201575  |
| 8                                                                 | -7.127105 | 1.089308  | -0.523762 |
| 6                                                                 | 5.111405  | 1.505580  | -0.130969 |
| 6                                                                 | -5.970135 | 1.296582  | -0.331011 |
| 12                                                                | 3.126037  | -2.620495 | -0.287687 |
| 6                                                                 | 4.665622  | 0.259803  | -0.082655 |
| 6                                                                 | -4.702801 | 1.332190  | -0.076996 |
| 6                                                                 | 0.137399  | -3.218809 | 0.003169  |
| 6                                                                 | 4.202817  | -0.913749 | -0.031588 |
| 6                                                                 | 1.323024  | -3.495116 | -0.238251 |
| 6                                                                 | -3.489691 | 1.922584  | 0.036041  |
| 16                                                                |           |           |           |
| 122.112323 Kcal/mol 5.295298 eV -101.189082 H Original2D_0_13.log |           |           |           |
| 6                                                                 | 1.411291  | -0.172274 | -0.000000 |
| 6                                                                 | -0.039167 | -1.629617 | 0.000000  |
| 6                                                                 | 1.398605  | -1.693945 | -0.000000 |
| 6                                                                 | 2.742713  | -2.049415 | -0.000000 |
| 6                                                                 | -2.616535 | -0.411532 | 0.000000  |
| 6                                                                 | -1.239379 | -2.511178 | 0.000000  |
| 6                                                                 | 3.497384  | -0.933653 | -0.000000 |
| 6                                                                 | -2.242718 | 0.937887  | 0.000000  |
| 6                                                                 | -0.000000 | -0.156989 | 0.000000  |
| 6                                                                 | 2.678699  | 0.396460  | -0.000000 |
| 6                                                                 | -0.850226 | 0.966520  | 0.000000  |
| 6                                                                 | -2.393012 | -1.631805 | 0.000000  |
| 12                                                                | 1.762385  | 2.323451  | -0.000000 |
| 8                                                                 | -1.185702 | -3.748406 | 0.000000  |
| 8                                                                 | -0.198511 | 2.209036  | -0.000000 |



|                                                              |           |           |           |
|--------------------------------------------------------------|-----------|-----------|-----------|
| 12                                                           | -2.013403 | 3.147566  | -0.000000 |
| 16                                                           |           |           |           |
| 122.264731 Kcal/mol 5.301907 eV -101.188839 H Child_9_31.log |           |           |           |
| 6                                                            | 4.216873  | -1.061546 | -0.083355 |
| 12                                                           | -4.673031 | -1.051879 | -0.056770 |
| 6                                                            | 4.019643  | -2.333156 | -0.001292 |
| 6                                                            | -4.586603 | 1.033983  | -0.120397 |
| 6                                                            | 4.378467  | 0.259391  | -0.319835 |
| 8                                                            | -2.820843 | -1.496285 | -0.056632 |
| 12                                                           | 1.945176  | -1.946590 | 0.226703  |
| 6                                                            | -3.355569 | 0.763591  | -0.067153 |
| 6                                                            | 3.356191  | 1.123844  | -0.179058 |
| 6                                                            | -2.281558 | -0.191786 | -0.024113 |
| 6                                                            | 2.361285  | 1.878492  | -0.136787 |
| 6                                                            | 0.377883  | -0.562059 | 0.122195  |
| 6                                                            | 0.235849  | 0.796792  | 0.065776  |
| 6                                                            | 0.950009  | 2.060472  | 0.074195  |
| 6                                                            | -0.955810 | 0.018360  | 0.046098  |
| 8                                                            | 0.375129  | 3.154204  | 0.269526  |
| 16                                                           |           |           |           |
| 122.278502 Kcal/mol 5.302504 eV -101.188817 H Child_6_33.log |           |           |           |
| 8                                                            | 7.250597  | 1.044046  | 0.458513  |
| 6                                                            | -3.276640 | 0.734987  | 0.039400  |
| 6                                                            | 6.241319  | 0.418969  | 0.270987  |
| 6                                                            | -2.934532 | 1.996100  | -0.028418 |
| 6                                                            | 5.169687  | -0.232977 | 0.079329  |
| 6                                                            | -4.173568 | -0.422368 | 0.302780  |
| 6                                                            | 4.067641  | -0.886587 | -0.114424 |
| 6                                                            | -2.519271 | 3.200626  | -0.081329 |
| 6                                                            | 2.989636  | -1.518044 | -0.299813 |
| 6                                                            | -1.978020 | 4.370454  | -0.065731 |
| 6                                                            | 1.765262  | -2.007328 | -0.442969 |
| 8                                                            | -1.476051 | 5.449485  | -0.057738 |
| 6                                                            | 0.573459  | -2.395985 | -0.522374 |
| 12                                                           | -3.951240 | -3.475448 | 0.568779  |
| 12                                                           | -1.439699 | -2.168189 | -0.369195 |
| 6                                                            | -2.842490 | -0.628615 | -0.070974 |
| 16                                                           |           |           |           |
| 122.401550 Kcal/mol 5.307840 eV -101.188621 H MutD_10_72.log |           |           |           |
| 6                                                            | -1.504952 | 3.341001  | 0.054200  |
| 6                                                            | 3.488206  | -0.077286 | 0.017718  |
| 8                                                            | 5.787438  | 0.866573  | 0.057498  |
| 6                                                            | -2.860624 | -2.046779 | 0.055722  |
| 6                                                            | 4.681622  | 0.402693  | 0.037261  |
| 6                                                            | -2.608647 | -0.724237 | 0.017832  |
| 12                                                           | 1.222210  | -2.571075 | -0.019312 |
| 12                                                           | -0.076593 | 1.767174  | -0.075355 |
| 6                                                            | -2.608120 | 2.742102  | 0.031226  |
| 8                                                            | -1.307109 | -0.194225 | -0.049305 |
| 6                                                            | -3.227351 | -3.274151 | 0.048586  |
| 6                                                            | -3.468920 | 0.382170  | 0.010778  |
| 6                                                            | 2.303994  | -0.639987 | -0.018110 |
| 6                                                            | -3.362650 | 1.613485  | 0.021646  |
| 6                                                            | -0.079243 | -0.940678 | -0.041538 |
| 6                                                            | 0.981681  | -0.066996 | -0.056911 |

```

16
122.605614 Kcal/mol 5.316689 eV -101.188296 H MutI_1_69.log
12  1.569616  -1.013567  -0.418150
 6  -0.341001  1.372371   2.194223
 6  3.984602  -0.486781   0.495832
 6  -2.496282  1.926636   -0.796795
 8  -0.222734  -1.282385   -0.219714
 8  -1.433163  1.095556   1.947303
 6  -2.121770  -3.176610   -0.591937
 6  3.752113  -1.711291   0.833816
 6  -1.323410  -2.017844   -0.350403
 6  2.482822  1.245524   -0.653316
 6  3.417773  0.596544   -0.136883
 6  -1.278938  2.178110   -0.984795
 6  0.077371  2.143153   -0.998685
 6  1.278823  1.829144   -0.854712
12  -2.850969  0.125378   0.246724
 6  -2.661535  -1.873471   -0.116947
16
122.612616 Kcal/mol 5.316993 eV -101.188285 H Original3D_2_7.log
 6  -0.046336  -1.207725   0.096503
 8  1.179502  -0.518264   0.070921
 6  -1.309967  -0.519665   -0.111945
 6  -3.889413  0.777730   -0.275433
12  2.973399  -0.689328   -0.557607
 6  -0.102454  -2.520377   0.350268
 6  3.417337  1.350431   0.092444
 6  4.460804  0.806563   -0.387144
 6  -1.476828  0.861251   0.086376
 6  -2.770301  1.455321   -0.035194
 6  -0.576521  2.115644   0.308863
 6  -1.745406  2.641799   -0.069996
12  1.388746  1.510290   0.541702
 8  -0.133869  -3.700760   0.429879
 6  -2.521219  -1.267438   -0.348567
 6  -3.558161  -0.510095   -0.342098
16
122.847518 Kcal/mol 5.327179 eV -101.187910 H Original3D_18_4.log
 8  4.888797  -1.464777   0.404433
 6  -0.347883  -0.579138   -2.100402
 6  -0.591406  0.389780   -1.263938
 6  -0.706160  0.091241   0.269289
 6  1.974326  0.835301   0.796341
 6  0.563669  0.704325   0.771778
 6  3.174662  0.271578   0.766058
 6  -1.946743  0.839306   0.699711
 6  -1.765703  -2.333972   0.736834
 8  -0.152819  -1.436790   -2.899270
12  -0.309141  2.455145   -0.954688
12  -3.442578  -1.113643   0.920168
 6  1.061873  1.979913   0.604145
 6  4.019793  -0.663921   0.599367
 6  -3.171500  0.956979   0.937769
 6  -1.076128  -1.305640   0.578535
16

```

123.149306 Kcal/mol 5.340266 eV -101.187430 H Child\_10\_25.log

|    |           |           |           |
|----|-----------|-----------|-----------|
| 12 | 0.581470  | -2.864113 | -0.122996 |
| 6  | 0.923068  | 3.675130  | -0.952706 |
| 6  | -2.430107 | -1.709992 | -0.075678 |
| 12 | 2.225099  | 2.284709  | 0.106295  |
| 8  | 2.425518  | -2.952011 | -0.042216 |
| 6  | -0.176803 | 3.133589  | -0.614035 |
| 8  | -4.689070 | -0.941003 | -0.065838 |
| 6  | 0.120264  | 2.446604  | 1.074512  |
| 6  | -3.470745 | -0.718164 | -0.014642 |
| 6  | -0.978971 | 2.358089  | 0.311417  |
| 6  | -1.396733 | -2.384178 | -0.106098 |
| 6  | 3.050843  | 0.428010  | 0.096231  |
| 6  | 3.522809  | -2.200578 | 0.070143  |
| 6  | -2.096272 | 1.528772  | 0.211102  |
| 6  | -2.879047 | 0.599711  | 0.116436  |
| 6  | 3.216625  | -0.807501 | 0.060793  |

16

123.204116 Kcal/mol 5.342643 eV -101.187342 H MutI\_3\_79.log

|    |           |           |           |
|----|-----------|-----------|-----------|
| 12 | -0.460783 | -0.477222 | 2.144397  |
| 6  | 0.301135  | 1.395332  | 1.101359  |
| 6  | -1.519884 | 0.361490  | -1.449567 |
| 6  | -0.180656 | 2.010133  | -0.099879 |
| 6  | -0.313542 | -1.778068 | -1.937383 |
| 6  | -1.255354 | 1.402320  | -0.834953 |
| 6  | 2.537280  | 0.257533  | 1.215709  |
| 6  | -3.456329 | -0.276735 | 0.907159  |
| 12 | 2.229312  | -1.856106 | 0.877260  |
| 8  | 1.770291  | 3.093306  | -1.280566 |
| 8  | -4.540187 | -0.457614 | 0.574927  |
| 6  | 0.816369  | 2.650336  | -0.791191 |
| 6  | -1.169976 | -0.878297 | -1.890877 |
| 6  | 0.837631  | -2.420056 | -1.603298 |
| 6  | 1.912799  | -2.730188 | -1.033445 |
| 6  | 1.646664  | 1.158603  | 1.313903  |

16

123.286535 Kcal/mol 5.346217 eV -101.187211 H Child\_2\_51.log

|    |           |           |           |
|----|-----------|-----------|-----------|
| 6  | -2.072720 | -1.749593 | -0.667060 |
| 6  | 2.886892  | 1.861087  | -2.480508 |
| 6  | -3.198983 | -2.231187 | -0.409046 |
| 6  | 3.063596  | 1.290397  | -1.339535 |
| 6  | -0.972609 | -0.861931 | -0.852625 |
| 6  | -3.455276 | 1.468157  | 0.570061  |
| 6  | 2.691770  | -0.693229 | 0.190122  |
| 6  | 3.236883  | 0.602731  | -0.211866 |
| 6  | 1.545189  | -1.134475 | -0.409733 |
| 8  | 3.333024  | -1.271554 | 1.229196  |
| 6  | -1.402474 | 0.476466  | -0.655768 |
| 6  | -2.255112 | 1.242858  | -0.145013 |
| 6  | 0.351887  | -1.151995 | -0.783703 |
| 12 | 4.428135  | 0.304976  | 1.567434  |
| 12 | -4.234019 | -0.647325 | 0.438853  |
| 8  | -3.938481 | 2.445614  | 1.157378  |

16

123.353431 Kcal/mol 5.349118 eV -101.187104 H Child\_5\_18.log

|                                                                   |           |           |           |
|-------------------------------------------------------------------|-----------|-----------|-----------|
| 6                                                                 | -5.197559 | -0.472075 | 1.008690  |
| 12                                                                | 4.001682  | 1.089175  | -0.391627 |
| 6                                                                 | -3.209026 | -1.371154 | -0.374070 |
| 6                                                                 | 2.229152  | 2.056074  | -0.667590 |
| 6                                                                 | -2.264737 | -1.872945 | -1.091604 |
| 6                                                                 | 1.107326  | 1.612752  | -0.371251 |
| 6                                                                 | -1.295994 | -2.392708 | -1.777381 |
| 12                                                                | 3.025921  | -1.744267 | 0.751636  |
| 6                                                                 | -4.194351 | -0.925246 | 0.318709  |
| 6                                                                 | -0.030183 | 0.856071  | 0.059877  |
| 8                                                                 | -3.480831 | 2.443444  | 0.214473  |
| 6                                                                 | 0.383035  | -0.439701 | 0.504528  |
| 6                                                                 | 1.008726  | -1.449624 | 0.869049  |
| 6                                                                 | -2.407960 | 1.909322  | 0.133387  |
| 6                                                                 | -1.296545 | 1.309640  | 0.055305  |
| 8                                                                 | 4.315512  | -0.576110 | 0.244776  |
| 16                                                                |           |           |           |
| 123.370146 Kcal/mol 5.349843 eV -101.187078 H Child_3_36.log      |           |           |           |
| 8                                                                 | -4.206432 | -0.930653 | 2.102546  |
| 6                                                                 | 4.792743  | -0.284490 | -0.290592 |
| 6                                                                 | -3.785683 | -0.736832 | 0.967242  |
| 6                                                                 | 4.228683  | 0.844669  | -0.207086 |
| 6                                                                 | -3.800122 | -0.122582 | -0.333794 |
| 6                                                                 | 3.310074  | 1.807528  | -0.112587 |
| 6                                                                 | -2.777284 | -1.005175 | -0.024282 |
| 12                                                                | 3.832071  | -2.036552 | 0.020406  |
| 12                                                                | -4.525567 | 1.348355  | -1.695501 |
| 6                                                                 | 2.335782  | 2.599971  | 0.024370  |
| 6                                                                 | -1.575906 | -1.577285 | -0.318718 |
| 6                                                                 | 2.022524  | -2.819393 | -0.128145 |
| 6                                                                 | -0.470662 | -2.108835 | -0.342461 |
| 6                                                                 | 1.328917  | 3.230624  | 0.361785  |
| 8                                                                 | 0.428804  | 4.002820  | 0.894444  |
| 6                                                                 | 0.814763  | -2.548026 | -0.241528 |
| 16                                                                |           |           |           |
| 123.659592 Kcal/mol 5.362394 eV -101.186616 H Original3D_18_7.log |           |           |           |
| 12                                                                | 3.869384  | 1.502001  | 0.433700  |
| 6                                                                 | 1.043882  | -1.335146 | 0.700421  |
| 12                                                                | -1.053361 | -1.076322 | 0.361062  |
| 6                                                                 | 2.961917  | -1.648016 | -0.952365 |
| 6                                                                 | 1.666831  | -0.262931 | 1.362893  |
| 6                                                                 | -2.395496 | 0.832643  | -0.358628 |
| 6                                                                 | -3.031477 | -0.411252 | 0.032668  |
| 6                                                                 | 2.346968  | 0.765889  | 1.603808  |
| 6                                                                 | 4.559481  | 0.349459  | -1.150824 |
| 6                                                                 | -4.231968 | -0.908989 | 0.005859  |
| 6                                                                 | -2.945176 | 2.091555  | -0.437470 |
| 8                                                                 | -5.261974 | -1.494066 | 0.003581  |
| 8                                                                 | -1.069012 | 0.669436  | -0.520897 |
| 6                                                                 | -3.102563 | 3.356123  | -0.336583 |
| 6                                                                 | 1.999454  | -1.826662 | -0.161288 |
| 6                                                                 | 3.937416  | -0.754525 | -1.208259 |
| 16                                                                |           |           |           |
| 123.695690 Kcal/mol 5.363960 eV -101.186559 H Child_6_34.log      |           |           |           |
| 6                                                                 | -7.647924 | -0.214151 | -0.275183 |

|    |           |           |           |
|----|-----------|-----------|-----------|
| 8  | 4.289399  | -0.646306 | -0.393457 |
| 6  | -6.356634 | -0.144878 | -0.232753 |
| 12 | 3.825855  | 1.097692  | -0.478347 |
| 6  | -5.062822 | -0.067530 | -0.154280 |
| 12 | 3.132460  | -1.937464 | 0.136774  |
| 6  | -3.795661 | -0.008643 | -0.037146 |
| 6  | 2.146687  | 2.289159  | -0.086845 |
| 6  | 1.136895  | -1.491611 | 0.526308  |
| 6  | -2.517520 | 0.058642  | 0.036534  |
| 6  | 0.850123  | 1.933502  | 0.208856  |
| 6  | 1.195267  | 3.316075  | 0.372513  |
| 6  | 0.085438  | -0.537812 | 0.485807  |
| 6  | -1.233068 | 0.105004  | 0.201483  |
| 6  | 0.029343  | 0.801313  | 0.334810  |
| 8  | 1.150535  | -2.623339 | -0.129261 |

16

123.732887 Kcal/mol 5.365573 eV -101.186500 H Child\_6\_41.log

|    |           |           |           |
|----|-----------|-----------|-----------|
| 8  | -5.399081 | -2.030837 | -0.411891 |
| 6  | 4.722729  | -1.461637 | 0.028695  |
| 6  | -4.420873 | -1.364172 | -0.235731 |
| 6  | 4.055734  | -0.931919 | -0.907049 |
| 6  | -3.411366 | -0.619372 | -0.045061 |
| 12 | 3.107517  | -1.024991 | 1.280609  |
| 6  | -2.275167 | 0.030608  | 0.149711  |
| 6  | 3.045875  | -0.266436 | -1.568163 |
| 6  | -2.104443 | 1.425255  | 0.330110  |
| 6  | 1.200620  | -0.225112 | 1.122397  |
| 6  | -1.846834 | 2.641341  | 0.444137  |
| 6  | 2.002264  | 0.351625  | -1.305853 |
| 12 | 0.136805  | 2.699322  | -0.074750 |
| 6  | 0.166129  | -0.113495 | 0.322080  |
| 6  | 1.006932  | 0.855218  | -0.443685 |
| 8  | -1.073600 | -0.722087 | 0.184411  |

16

123.774087 Kcal/mol 5.367359 eV -101.186434 H Original2D\_0\_26.log

|    |           |           |           |
|----|-----------|-----------|-----------|
| 6  | -1.572794 | 1.234785  | -0.000000 |
| 8  | -1.831405 | 2.599875  | -0.000000 |
| 6  | -2.138844 | -0.014972 | 0.000000  |
| 6  | -1.338118 | -1.129205 | 0.000000  |
| 6  | 0.513571  | 2.224079  | -0.000000 |
| 12 | -1.310440 | -3.193531 | 0.000000  |
| 6  | -0.000000 | -0.478230 | 0.000000  |
| 6  | -0.199241 | 0.934630  | -0.000000 |
| 6  | 0.166345  | -4.717243 | 0.000000  |
| 6  | 1.231803  | -1.249258 | 0.000000  |
| 8  | -0.507128 | 4.488414  | -0.000000 |
| 6  | 1.025004  | -3.781087 | 0.000000  |
| 6  | 1.845797  | 2.334387  | -0.000000 |
| 6  | 1.465559  | -2.501945 | 0.000000  |
| 6  | -0.567644 | 3.280058  | -0.000000 |
| 12 | 2.653742  | 0.400006  | -0.000000 |

16

123.967935 Kcal/mol 5.375765 eV -101.186125 H Child\_12\_18.log

|   |           |           |           |
|---|-----------|-----------|-----------|
| 8 | -5.258751 | -0.234241 | -0.434971 |
| 6 | 2.735471  | -0.919611 | -1.328719 |

|                                                              |           |           |           |
|--------------------------------------------------------------|-----------|-----------|-----------|
| 6                                                            | -3.465313 | 1.256785  | 0.421807  |
| 6                                                            | 3.706259  | -0.174987 | -1.041096 |
| 6                                                            | -2.256164 | 1.490841  | 0.591428  |
| 8                                                            | 1.519041  | -3.668106 | 1.360680  |
| 6                                                            | -4.100611 | 0.094404  | -0.210102 |
| 6                                                            | 1.109994  | -2.853088 | 0.672113  |
| 6                                                            | -1.054957 | 0.722642  | 0.238117  |
| 12                                                           | 3.722531  | 1.594037  | -0.084520 |
| 6                                                            | -2.812654 | -0.567605 | -0.487948 |
| 12                                                           | 0.775864  | -0.961212 | -0.698486 |
| 6                                                            | -1.532556 | -0.520508 | -0.425734 |
| 6                                                            | 1.167114  | 1.890068  | 0.713954  |
| 6                                                            | 2.190153  | 2.619809  | 0.859621  |
| 6                                                            | 0.302754  | 0.898731  | 0.328292  |
| 16                                                           |           |           |           |
| 124.061112 Kcal/mol 5.379806 eV -101.185976 H Child_6_30.log |           |           |           |
| 12                                                           | 0.914376  | -3.142102 | 0.238927  |
| 8                                                            | -4.381131 | 2.809891  | 0.762602  |
| 6                                                            | -0.923561 | -3.252877 | -0.466354 |
| 6                                                            | -3.686064 | 1.883290  | 0.466640  |
| 6                                                            | 1.874733  | -1.346505 | 0.488545  |
| 6                                                            | 1.049796  | 1.898847  | -1.192054 |
| 6                                                            | 2.826674  | -0.557843 | 0.766924  |
| 6                                                            | -2.933943 | 0.901110  | 0.162306  |
| 6                                                            | 3.785249  | 0.383419  | 0.872696  |
| 6                                                            | 2.146038  | 2.432143  | -0.858652 |
| 6                                                            | -1.801820 | -2.375885 | -0.399277 |
| 6                                                            | -2.066556 | -0.049506 | -0.127806 |
| 6                                                            | 3.739034  | 1.591363  | 0.444262  |
| 6                                                            | 3.406312  | 2.591556  | -0.342086 |
| 12                                                           | 0.081704  | 0.152523  | -0.452118 |
| 8                                                            | -2.674906 | -1.399856 | -0.304173 |
| 16                                                           |           |           |           |
| 124.385833 Kcal/mol 5.393887 eV -101.185459 H Child_8_23.log |           |           |           |
| 6                                                            | 4.215001  | -1.951319 | -0.031401 |
| 6                                                            | -2.783285 | 2.147462  | 0.059730  |
| 6                                                            | 2.772992  | -1.635154 | 0.079608  |
| 12                                                           | -0.847213 | 2.009001  | 0.486580  |
| 6                                                            | 3.651203  | -0.626141 | -0.172159 |
| 6                                                            | -3.644487 | 1.284785  | -0.190531 |
| 12                                                           | 0.729170  | -1.344482 | 0.362310  |
| 8                                                            | 4.404286  | 1.601466  | -0.746373 |
| 8                                                            | -1.089403 | -1.533559 | 0.281720  |
| 6                                                            | -4.291718 | 0.082922  | -0.372847 |
| 6                                                            | -2.336611 | -1.545290 | 0.047519  |
| 6                                                            | 2.200686  | 1.185154  | 0.139641  |
| 6                                                            | 3.549286  | 0.828208  | -0.304708 |
| 6                                                            | 1.022371  | 1.087242  | 0.506885  |
| 6                                                            | -5.020961 | -1.005336 | -0.606858 |
| 6                                                            | -3.518238 | -1.272113 | -0.233123 |
| 16                                                           |           |           |           |
| 124.389466 Kcal/mol 5.394045 eV -101.185453 H Child_3_13.log |           |           |           |
| 6                                                            | -3.428773 | 1.043473  | 0.526618  |
| 6                                                            | 1.671068  | 0.411418  | 1.741241  |
| 6                                                            | -2.542037 | 1.235433  | 1.406718  |

|                                                                   |           |           |           |
|-------------------------------------------------------------------|-----------|-----------|-----------|
| 6                                                                 | 2.141996  | -0.809550 | 1.145734  |
| 12                                                                | -2.439407 | 0.145460  | -1.028877 |
| 6                                                                 | 1.605434  | -2.046970 | 0.822703  |
| 6                                                                 | -0.423688 | 0.830348  | -1.645775 |
| 6                                                                 | 2.433052  | 0.393532  | 0.546748  |
| 8                                                                 | 2.961587  | 1.496017  | -1.591581 |
| 12                                                                | -0.565397 | 0.835745  | 1.694553  |
| 6                                                                 | 0.769713  | 0.610015  | -1.070079 |
| 6                                                                 | 0.563206  | -2.285193 | 0.177279  |
| 6                                                                 | 2.181098  | 0.922380  | -0.840122 |
| 6                                                                 | -0.218683 | -0.152539 | -0.267453 |
| 6                                                                 | -0.523692 | -1.557267 | -0.455110 |
| 8                                                                 | -1.625900 | -1.914133 | -0.973309 |
| 16                                                                |           |           |           |
| 124.862321 Kcal/mol 5.414550 eV -101.184700 H Original2D_0_17.log |           |           |           |
| 6                                                                 | -0.000000 | -1.194665 | 0.000000  |
| 6                                                                 | 0.308911  | 1.402557  | -0.000000 |
| 6                                                                 | 1.402871  | -0.850475 | -0.000000 |
| 8                                                                 | 0.553376  | -4.026466 | 0.000000  |
| 6                                                                 | -1.089280 | 1.057957  | 0.000000  |
| 6                                                                 | 1.488557  | 0.516747  | -0.000000 |
| 6                                                                 | -1.166291 | -0.306586 | 0.000000  |
| 6                                                                 | -0.776388 | -3.729091 | 0.000000  |
| 6                                                                 | -0.848614 | -2.284332 | 0.000000  |
| 6                                                                 | 1.088954  | 2.573310  | -0.000000 |
| 12                                                                | -0.310316 | 4.143192  | -0.000000 |
| 6                                                                 | -1.951026 | 2.190402  | -0.000000 |
| 8                                                                 | -2.086721 | -1.345509 | 0.000000  |
| 6                                                                 | -2.241689 | 3.407761  | -0.000000 |
| 12                                                                | 2.026399  | -2.829297 | 0.000000  |
| 6                                                                 | 2.396288  | 1.751259  | -0.000000 |
| 16                                                                |           |           |           |
| 125.152232 Kcal/mol 5.427121 eV -101.184238 H MutD_15_34.log      |           |           |           |
| 6                                                                 | 1.776119  | -1.771988 | -0.644567 |
| 6                                                                 | 2.814723  | -1.173442 | -0.355935 |
| 6                                                                 | -2.225691 | -0.513228 | 1.566806  |
| 12                                                                | -0.396074 | 2.315408  | 0.640250  |
| 8                                                                 | 4.808420  | 0.074182  | 0.103530  |
| 6                                                                 | 0.420335  | -1.951044 | -0.832636 |
| 12                                                                | -1.936146 | 0.038351  | -1.166654 |
| 6                                                                 | -0.807177 | -1.770659 | -0.934373 |
| 6                                                                 | -1.595413 | 0.586334  | 1.559177  |
| 6                                                                 | 2.617287  | 1.076403  | 0.275109  |
| 8                                                                 | -2.003099 | -2.652669 | 0.578093  |
| 6                                                                 | -1.985796 | 2.295781  | -0.768218 |
| 6                                                                 | 1.644838  | 1.809980  | 0.531533  |
| 6                                                                 | -2.413480 | -1.787315 | 1.287563  |
| 6                                                                 | -2.896002 | 1.914856  | -1.558009 |
| 6                                                                 | 3.574269  | 0.014785  | 0.017527  |
| 16                                                                |           |           |           |
| 125.801670 Kcal/mol 5.455284 eV -101.183203 H Child_10_38.log     |           |           |           |
| 8                                                                 | 5.079114  | 1.009373  | -1.341240 |
| 6                                                                 | -3.016757 | -1.308949 | -1.097523 |
| 6                                                                 | 4.110124  | 0.590539  | -0.754584 |
| 6                                                                 | -3.486504 | -0.259599 | -1.661037 |

|                                                               |           |           |           |
|---------------------------------------------------------------|-----------|-----------|-----------|
| 6                                                             | 3.094308  | 0.322476  | -0.013955 |
| 6                                                             | -2.589647 | -2.405594 | -0.476489 |
| 6                                                             | 2.218701  | -0.594880 | 0.796406  |
| 6                                                             | -1.522168 | -2.811653 | 0.205455  |
| 6                                                             | 1.664352  | 0.520262  | 0.284605  |
| 6                                                             | -0.507090 | -3.211733 | 0.854552  |
| 12                                                            | 1.297427  | -2.358001 | 1.263038  |
| 12                                                            | -2.320019 | 1.432542  | -1.440624 |
| 6                                                             | 0.540512  | 1.182145  | -0.139885 |
| 6                                                             | -2.094169 | 3.408674  | 2.459716  |
| 8                                                             | -2.003790 | 2.520400  | 1.732882  |
| 6                                                             | -0.466909 | 1.712863  | -0.624281 |
| 16                                                            |           |           |           |
| 126.395965 Kcal/mol 5.481055 eV -101.182256 H MutD_15_78.log  |           |           |           |
| 6                                                             | 2.538766  | 2.817623  | 0.249340  |
| 6                                                             | 4.343384  | 1.026321  | -0.328127 |
| 6                                                             | -9.128423 | -0.318055 | -0.160166 |
| 12                                                            | 6.055260  | -1.470676 | -0.833720 |
| 6                                                             | -2.705403 | 0.003114  | -0.144699 |
| 6                                                             | 3.497572  | 2.060571  | -0.142801 |
| 12                                                            | 1.586255  | 0.793572  | 0.440077  |
| 8                                                             | -0.255525 | 0.373502  | 0.003937  |
| 6                                                             | 3.129532  | -0.920393 | 0.564425  |
| 6                                                             | -6.544711 | -0.293908 | -0.090069 |
| 6                                                             | -5.258531 | -0.247649 | -0.121366 |
| 6                                                             | -1.464299 | 0.178255  | -0.087939 |
| 6                                                             | -7.826219 | -0.327607 | -0.082771 |
| 8                                                             | 3.104895  | -2.039854 | 1.058993  |
| 6                                                             | 4.329754  | -0.252627 | -0.138877 |
| 6                                                             | -3.993613 | -0.149635 | -0.146902 |
| 16                                                            |           |           |           |
| 126.517291 Kcal/mol 5.486316 eV -101.182062 H Child_10_35.log |           |           |           |
| 8                                                             | -4.788582 | -2.218625 | 0.548311  |
| 6                                                             | 3.236081  | -0.310638 | -0.685205 |
| 6                                                             | -4.716946 | -1.039744 | 0.449584  |
| 6                                                             | 3.471080  | -1.547892 | -0.573710 |
| 6                                                             | -4.473186 | 0.232794  | 0.364587  |
| 6                                                             | 2.618692  | 0.882234  | -0.682846 |
| 6                                                             | -4.763798 | 1.677778  | 0.391437  |
| 6                                                             | 1.566299  | 1.535861  | -0.579507 |
| 6                                                             | -3.420437 | 1.249720  | 0.123164  |
| 6                                                             | 0.309957  | 1.963253  | -0.388872 |
| 6                                                             | -2.106617 | 1.241933  | -0.148192 |
| 6                                                             | 6.149722  | -0.293552 | 1.144461  |
| 6                                                             | -0.906914 | 1.844926  | -0.239870 |
| 12                                                            | 1.497291  | -2.127591 | -0.369591 |
| 12                                                            | -0.856685 | -0.655159 | -0.360329 |
| 8                                                             | 6.104723  | 0.815245  | 1.165296  |
| 16                                                            |           |           |           |
| 126.592546 Kcal/mol 5.489579 eV -101.181942 H Child_12_14.log |           |           |           |
| 6                                                             | 0.270635  | -4.592645 | -0.425850 |
| 6                                                             | -2.012653 | 2.404792  | -0.539796 |
| 6                                                             | 0.714877  | -3.390036 | -0.212277 |
| 6                                                             | -2.474119 | 1.140087  | -0.297528 |
| 6                                                             | 1.139941  | -2.191383 | -0.016977 |



|                                                                   |           |           |           |
|-------------------------------------------------------------------|-----------|-----------|-----------|
| 6                                                                 | -0.823710 | 2.803787  | -0.373098 |
| 6                                                                 | 2.759843  | -0.336995 | -0.324502 |
| 12                                                                | -3.553552 | -0.642312 | -0.113538 |
| 6                                                                 | 3.639579  | 0.523989  | -0.567445 |
| 6                                                                 | 0.289082  | 2.133724  | 0.085395  |
| 6                                                                 | 1.586621  | -0.960906 | 0.157516  |
| 6                                                                 | -1.423683 | 0.280997  | 0.214881  |
| 8                                                                 | 0.852103  | -0.048235 | 1.001725  |
| 6                                                                 | -0.121997 | 0.801295  | 0.403429  |
| 12                                                                | 2.372513  | 2.043599  | 0.075708  |
| 8                                                                 | -1.738856 | -1.016225 | 0.477209  |
| 16                                                                |           |           |           |
| 126.714756 Kcal/mol 5.494879 eV -101.181748 H Original3D_0_67.log |           |           |           |
| 6                                                                 | -1.498611 | 2.099168  | -0.220058 |
| 6                                                                 | 0.890863  | 1.293346  | -0.404838 |
| 12                                                                | 3.459232  | 0.933005  | 0.528480  |
| 6                                                                 | 1.008944  | 3.163444  | -0.500453 |
| 6                                                                 | -2.649048 | 1.655068  | 0.124573  |
| 6                                                                 | 2.964825  | -1.071301 | 0.495964  |
| 8                                                                 | -2.418726 | -2.639575 | -0.611470 |
| 6                                                                 | 2.193989  | -2.072031 | 0.559573  |
| 6                                                                 | 0.019757  | -2.503702 | -0.136966 |
| 6                                                                 | -3.695757 | 1.037128  | 0.492702  |
| 12                                                                | 0.914384  | -0.712825 | -0.930807 |
| 6                                                                 | 1.080126  | -2.896848 | 0.670438  |
| 6                                                                 | -1.266171 | -2.708138 | -0.306271 |
| 6                                                                 | -0.222597 | 2.263092  | -0.401369 |
| 8                                                                 | -4.678829 | 0.456523  | 0.855425  |
| 6                                                                 | 1.889856  | 2.211150  | 0.106085  |
| 16                                                                |           |           |           |
| 126.755894 Kcal/mol 5.496663 eV -101.181682 H MutD_4_68.log       |           |           |           |
| 6                                                                 | -2.298338 | -1.574593 | 0.000512  |
| 8                                                                 | 4.036430  | -0.131376 | -0.000956 |
| 6                                                                 | 3.011323  | 0.483345  | -0.001374 |
| 6                                                                 | -0.905705 | -1.237822 | 0.000355  |
| 6                                                                 | 0.046905  | -0.309735 | -0.000694 |
| 6                                                                 | -3.922859 | 0.551526  | -0.001096 |
| 8                                                                 | 2.127547  | -3.603447 | 0.001720  |
| 6                                                                 | 1.976372  | 1.264280  | -0.001367 |
| 6                                                                 | -2.774658 | -2.836292 | 0.001909  |
| 6                                                                 | 0.512773  | 1.064154  | -0.000972 |
| 6                                                                 | 1.333872  | -2.703157 | -0.000600 |
| 6                                                                 | -0.380066 | 2.141521  | 0.000369  |
| 6                                                                 | 0.474030  | -1.744301 | -0.001230 |
| 12                                                                | -2.412594 | 1.935557  | -0.000615 |
| 6                                                                 | -3.235460 | -0.490254 | -0.000563 |
| 12                                                                | 1.384182  | 3.249990  | 0.002480  |
| 16                                                                |           |           |           |
| 126.841530 Kcal/mol 5.500376 eV -101.181546 H Original3D_3_5.log  |           |           |           |
| 6                                                                 | -1.262490 | 0.303408  | 0.059367  |
| 6                                                                 | 2.510825  | 0.326280  | -0.223339 |
| 6                                                                 | -0.169530 | -0.578124 | -0.170983 |
| 6                                                                 | -2.444815 | -0.504487 | 0.166319  |
| 6                                                                 | -3.648771 | -0.016020 | 0.434082  |
| 6                                                                 | 1.532854  | 1.394827  | -0.277483 |

|                                                               |           |           |           |
|---------------------------------------------------------------|-----------|-----------|-----------|
| 12                                                            | -0.361370 | 2.244430  | -0.022049 |
| 6                                                             | 1.113125  | 0.070858  | -0.275435 |
| 12                                                            | -1.719113 | 4.966427  | 0.069329  |
| 6                                                             | -1.947610 | -1.947263 | -0.048149 |
| 6                                                             | -2.673026 | -3.069286 | -0.034118 |
| 6                                                             | -0.547554 | -1.965093 | -0.249636 |
| 6                                                             | 3.752616  | -0.121408 | -0.109954 |
| 6                                                             | 4.734690  | -0.881906 | 0.140638  |
| 8                                                             | -3.316137 | -4.045529 | -0.012293 |
| 8                                                             | 5.724127  | -1.529596 | 0.382892  |
| 16                                                            |           |           |           |
| 126.912421 Kcal/mol 5.503450 eV -101.181433 H Child_14_26.log |           |           |           |
| 6                                                             | 2.416182  | -1.054831 | -0.030535 |
| 6                                                             | -1.773534 | 3.451828  | 0.043716  |
| 6                                                             | 1.158209  | -0.806062 | -0.024568 |
| 8                                                             | 2.939767  | 1.617587  | -0.083418 |
| 6                                                             | 3.704576  | -1.042893 | -0.003099 |
| 6                                                             | 1.757473  | 1.717055  | -0.036610 |
| 6                                                             | -0.117616 | -1.201794 | 0.012895  |
| 6                                                             | -0.738262 | 2.383448  | 0.032040  |
| 8                                                             | -4.327521 | -1.162416 | 0.008225  |
| 6                                                             | -2.184578 | 2.144709  | -0.013200 |
| 6                                                             | 4.983416  | -1.159740 | 0.046305  |
| 6                                                             | 0.488818  | 1.968548  | 0.016285  |
| 6                                                             | -1.359156 | -1.463444 | 0.021209  |
| 12                                                            | -3.228382 | 0.341690  | 0.014381  |
| 12                                                            | -3.158554 | -2.535161 | -0.024608 |
| 6                                                             | 6.288681  | -1.156778 | 0.056271  |
| 16                                                            |           |           |           |
| 126.941697 Kcal/mol 5.504720 eV -101.181386 H Child_7_35.log  |           |           |           |
| 6                                                             | 1.003767  | -3.171587 | -0.201385 |
| 6                                                             | 5.367731  | 1.441435  | 0.325698  |
| 6                                                             | 0.295141  | -1.908399 | -0.125949 |
| 8                                                             | 4.366846  | 2.092311  | -0.051969 |
| 6                                                             | -0.240282 | -0.568399 | -0.129287 |
| 8                                                             | -7.732361 | 0.549861  | 0.340762  |
| 6                                                             | -1.539040 | -0.231974 | -0.171938 |
| 6                                                             | -6.552223 | 0.519879  | 0.164737  |
| 6                                                             | 1.683117  | -1.850032 | -0.109768 |
| 6                                                             | -5.283417 | 0.495659  | -0.009703 |
| 6                                                             | 0.927930  | 0.347855  | -0.097724 |
| 6                                                             | -4.030269 | 0.317914  | -0.103610 |
| 6                                                             | -2.764063 | 0.091234  | -0.195669 |
| 12                                                            | 2.479558  | 1.634996  | -0.291340 |
| 6                                                             | 2.116605  | -0.449294 | -0.074578 |
| 12                                                            | 4.271620  | -0.913589 | 0.463400  |
| 16                                                            |           |           |           |
| 127.103701 Kcal/mol 5.511745 eV -101.181128 H MutD_3_72.log   |           |           |           |
| 6                                                             | 4.096201  | 0.562773  | 0.795236  |
| 6                                                             | 2.922265  | -0.366562 | 0.864844  |
| 12                                                            | -0.249189 | -2.545730 | -0.114375 |
| 8                                                             | 1.940098  | 2.692122  | -1.055559 |
| 6                                                             | -3.375257 | -1.515696 | -0.256329 |
| 6                                                             | -0.601964 | 0.542492  | -1.238556 |
| 6                                                             | 1.414219  | -2.477597 | 1.138426  |

|                                                              |           |           |           |
|--------------------------------------------------------------|-----------|-----------|-----------|
| 6                                                            | 2.191333  | -1.492825 | 1.139273  |
| 6                                                            | -2.844841 | 1.976710  | 1.061890  |
| 8                                                            | -3.015317 | 2.649001  | 1.990496  |
| 6                                                            | 0.253589  | -0.660653 | -1.153625 |
| 6                                                            | -2.311268 | -2.138493 | -0.076242 |
| 6                                                            | 1.905077  | 1.491653  | -0.737844 |
| 6                                                            | 0.771460  | 0.631047  | -1.104138 |
| 6                                                            | 2.851283  | 0.810084  | 0.125915  |
| 12                                                           | -2.670047 | 0.303515  | -0.788341 |
| 16                                                           |           |           |           |
| 127.115342 Kcal/mol 5.512250 eV -101.181109 H Child_9_45.log |           |           |           |
| 6                                                            | 3.480538  | 1.438100  | 1.146341  |
| 6                                                            | -3.649634 | 0.509016  | -1.587131 |
| 8                                                            | 3.554319  | -0.618590 | -1.749613 |
| 6                                                            | -3.133068 | -0.229919 | -0.515025 |
| 6                                                            | 2.864109  | 0.573399  | 0.175617  |
| 6                                                            | -2.765429 | 1.115857  | -0.538718 |
| 6                                                            | 2.881030  | -0.585663 | -0.683925 |
| 6                                                            | -2.819934 | -1.399684 | 0.161444  |
| 6                                                            | 2.154827  | 1.670534  | 0.596051  |
| 8                                                            | -1.644507 | 2.944357  | 0.694011  |
| 6                                                            | 2.037356  | -1.653416 | -0.222285 |
| 6                                                            | -1.770252 | 1.941647  | -0.135229 |
| 6                                                            | 1.216984  | -2.464961 | 0.205592  |
| 6                                                            | -2.436022 | -2.443200 | 0.710290  |
| 12                                                           | 0.267640  | 2.419974  | 0.271592  |
| 12                                                           | -0.571100 | -3.206340 | 0.775632  |
| 16                                                           |           |           |           |
| 127.166793 Kcal/mol 5.514481 eV -101.181027 H Child_3_25.log |           |           |           |
| 8                                                            | -1.246591 | 1.777159  | -0.215398 |
| 8                                                            | 6.299505  | -0.874082 | 0.172381  |
| 12                                                           | -4.691755 | -0.179119 | 0.170104  |
| 6                                                            | 5.352900  | -0.226569 | 0.073028  |
| 6                                                            | -3.955509 | -2.059917 | 0.291749  |
| 12                                                           | 3.035199  | 0.395170  | -0.029917 |
| 6                                                            | -0.191851 | -2.189682 | -0.148489 |
| 6                                                            | 2.064904  | 2.188661  | 0.245563  |
| 6                                                            | 1.134452  | -1.892412 | -0.237940 |
| 6                                                            | 0.849443  | 2.471462  | 0.138034  |
| 6                                                            | -2.746753 | -2.311904 | 0.114673  |
| 6                                                            | -2.574029 | 1.757802  | -0.222673 |
| 6                                                            | 2.312865  | -1.482017 | -0.295415 |
| 6                                                            | -0.473439 | 2.913237  | 0.059756  |
| 6                                                            | -1.399781 | -2.371700 | -0.046236 |
| 6                                                            | -3.797308 | 1.566833  | -0.195071 |
| 16                                                           |           |           |           |
| 127.241868 Kcal/mol 5.517737 eV -101.180908 H MutI_2_65.log  |           |           |           |
| 6                                                            | -1.458439 | 6.277974  | -0.000000 |
| 6                                                            | -0.986903 | -3.513310 | -0.000000 |
| 6                                                            | 0.169556  | -4.041825 | 0.000000  |
| 12                                                           | 2.167016  | -3.152645 | 0.000000  |
| 6                                                            | -2.369486 | 0.016517  | -0.000000 |
| 8                                                            | 4.657382  | -1.484123 | 0.000000  |
| 6                                                            | -2.303164 | -1.321596 | -0.000000 |
| 6                                                            | 4.932339  | -0.363965 | 0.000000  |

|                                                               |           |           |           |
|---------------------------------------------------------------|-----------|-----------|-----------|
| 6                                                             | -2.510720 | 1.275495  | -0.000000 |
| 12                                                            | 0.000000  | -1.186370 | 0.000000  |
| 6                                                             | -2.527843 | 2.588517  | -0.000000 |
| 6                                                             | -2.014745 | 5.113947  | -0.000000 |
| 6                                                             | -1.939530 | -2.533443 | -0.000000 |
| 6                                                             | -2.291707 | 3.830841  | -0.000000 |
| 6                                                             | 0.738990  | 0.942711  | 0.000000  |
| 8                                                             | 1.513335  | 1.788748  | 0.000000  |
| 16                                                            |           |           |           |
| 127.636480 Kcal/mol 5.534849 eV -101.180279 H Child_8_13.log  |           |           |           |
| 6                                                             | 4.207244  | 0.651587  | -0.474618 |
| 12                                                            | -3.099269 | 1.627298  | -0.009710 |
| 12                                                            | 2.780524  | -1.093001 | 0.184280  |
| 6                                                             | -1.446198 | 2.800538  | 0.080178  |
| 6                                                             | 0.520978  | -3.198330 | -0.062878 |
| 6                                                             | -3.291501 | -0.382222 | 0.663214  |
| 6                                                             | 3.066894  | 1.175458  | -0.320765 |
| 6                                                             | -1.964085 | -2.556378 | -0.076547 |
| 6                                                             | -0.832751 | -3.047785 | -0.075706 |
| 6                                                             | -0.216048 | 2.687031  | 0.007318  |
| 6                                                             | 1.706815  | -2.816162 | -0.003924 |
| 6                                                             | -3.156261 | -0.338650 | -0.843787 |
| 6                                                             | 1.744558  | 1.398635  | 0.107866  |
| 6                                                             | -2.787188 | -1.454491 | -0.096271 |
| 8                                                             | 1.191325  | 0.424042  | 0.699549  |
| 8                                                             | 1.122450  | 2.585090  | -0.139463 |
| 16                                                            |           |           |           |
| 127.778505 Kcal/mol 5.541007 eV -101.180052 H Child_16_16.log |           |           |           |
| 8                                                             | -4.624941 | 3.185581  | 0.684665  |
| 6                                                             | 6.897555  | 1.826952  | -1.365321 |
| 6                                                             | -3.790134 | 2.403578  | 0.774357  |
| 6                                                             | 5.860667  | 1.312870  | -0.774382 |
| 6                                                             | -2.490745 | -1.364853 | -1.699254 |
| 6                                                             | 4.834164  | 0.804743  | -0.192630 |
| 6                                                             | -1.850245 | -2.323690 | -1.253907 |
| 6                                                             | 3.809252  | 0.305092  | 0.384995  |
| 6                                                             | -1.015804 | -2.980569 | -0.397784 |
| 6                                                             | 2.777511  | -0.204290 | 0.915840  |
| 6                                                             | -2.985768 | -0.090962 | -1.744774 |
| 8                                                             | 1.774927  | -0.647685 | 1.400664  |
| 6                                                             | -3.252011 | 1.132099  | -1.551450 |
| 12                                                            | -0.223511 | -1.236611 | 1.369300  |
| 6                                                             | -0.254518 | -3.213725 | 0.577748  |
| 12                                                            | -2.146442 | 0.741059  | 0.403763  |
| 16                                                            |           |           |           |
| 127.888986 Kcal/mol 5.545798 eV -101.179876 H MutD_3_66.log   |           |           |           |
| 6                                                             | -0.421389 | 1.744716  | -0.153625 |
| 8                                                             | -2.053708 | 3.521908  | -0.767163 |
| 6                                                             | 2.736905  | 2.757863  | 0.667355  |
| 6                                                             | 0.924094  | 1.213913  | 0.100111  |
| 6                                                             | 0.316289  | -2.142651 | -0.276804 |
| 8                                                             | -3.926869 | 0.253960  | 0.688330  |
| 6                                                             | -2.963442 | -0.406172 | 0.435532  |
| 6                                                             | -1.251698 | 2.671833  | -0.484251 |
| 6                                                             | 2.303692  | 1.515057  | 0.362078  |

|                                                                   |           |           |           |
|-------------------------------------------------------------------|-----------|-----------|-----------|
| 12                                                                | 2.356245  | -1.907044 | -0.368597 |
| 6                                                                 | -0.534808 | -1.055815 | -0.052819 |
| 6                                                                 | 3.889896  | -0.620354 | 0.085283  |
| 6                                                                 | -1.989385 | -1.219113 | 0.165417  |
| 6                                                                 | -0.031015 | 0.303718  | -0.047200 |
| 6                                                                 | 3.225141  | 0.422263  | 0.260365  |
| 12                                                                | -1.471334 | -3.202830 | -0.109569 |
| 16                                                                |           |           |           |
| 128.086887 Kcal/mol 5.554380 eV -101.179561 H MutI_4_79.log       |           |           |           |
| 6                                                                 | -3.185765 | -1.319171 | 0.125220  |
| 6                                                                 | -2.436830 | -2.443941 | 0.061220  |
| 6                                                                 | -3.570209 | -0.164023 | 0.164046  |
| 6                                                                 | -1.446921 | 1.823834  | 0.001457  |
| 6                                                                 | -2.832915 | 2.065524  | -0.086790 |
| 8                                                                 | -3.864149 | 1.117271  | 0.224545  |
| 12                                                                | 4.680067  | 1.514214  | 0.110793  |
| 6                                                                 | -0.092053 | -3.369968 | -0.098400 |
| 12                                                                | 1.859943  | 1.590207  | 0.047580  |
| 6                                                                 | 2.149721  | -2.179830 | -0.116168 |
| 6                                                                 | 1.093769  | -3.029500 | -0.130328 |
| 6                                                                 | -3.077928 | 3.332303  | -0.464571 |
| 6                                                                 | 2.784194  | -1.134768 | -0.069228 |
| 8                                                                 | 3.237417  | 0.100733  | -0.013495 |
| 6                                                                 | -1.419422 | -3.132356 | -0.033431 |
| 6                                                                 | -0.210016 | 1.719048  | 0.048828  |
| 16                                                                |           |           |           |
| 128.642166 Kcal/mol 5.578459 eV -101.178676 H Original2D_0_19.log |           |           |           |
| 12                                                                | -0.026199 | -2.866641 | 0.000000  |
| 6                                                                 | -3.002162 | -0.690666 | 0.000000  |
| 6                                                                 | -2.378136 | 0.431654  | 0.000000  |
| 6                                                                 | 1.297553  | -0.118884 | -0.000000 |
| 6                                                                 | -2.191042 | -3.046490 | 0.000000  |
| 6                                                                 | -0.000000 | -0.703651 | 0.000000  |
| 6                                                                 | -2.930075 | -2.021125 | 0.000000  |
| 6                                                                 | 1.934447  | 1.078576  | -0.000000 |
| 6                                                                 | 2.749238  | -0.081565 | -0.000000 |
| 6                                                                 | 0.219382  | 2.832925  | -0.000000 |
| 6                                                                 | -0.797249 | 1.808176  | -0.000000 |
| 6                                                                 | -2.218168 | 1.972013  | -0.000000 |
| 8                                                                 | 1.691797  | 2.376669  | -0.000000 |
| 12                                                                | 2.903599  | -2.317375 | 0.000000  |
| 8                                                                 | 0.107775  | 4.031523  | -0.000000 |
| 6                                                                 | -0.838017 | 0.362813  | 0.000000  |
| 16                                                                |           |           |           |
| 128.734113 Kcal/mol 5.582447 eV -101.178530 H Child_7_43.log      |           |           |           |
| 12                                                                | -3.278947 | -0.057326 | 0.258437  |
| 8                                                                 | 1.939011  | -1.833953 | -0.380277 |
| 8                                                                 | -3.529103 | 4.241741  | 0.043657  |
| 6                                                                 | 2.952411  | -1.190203 | -0.206720 |
| 6                                                                 | -3.037391 | 3.156735  | -0.040216 |
| 6                                                                 | 3.994834  | -0.494467 | -0.008734 |
| 6                                                                 | -2.622438 | 1.932659  | -0.087270 |
| 12                                                                | -0.100113 | -1.724041 | -0.437837 |
| 6                                                                 | -1.458095 | 1.201872  | -0.391415 |
| 6                                                                 | 4.919187  | 0.379416  | 0.152065  |

|                                                              |           |           |           |
|--------------------------------------------------------------|-----------|-----------|-----------|
| 6                                                            | -2.974823 | -2.100873 | 0.414928  |
| 6                                                            | -2.925163 | -3.520171 | 0.629551  |
| 6                                                            | 5.810999  | 1.304182  | 0.305374  |
| 6                                                            | 6.680872  | 2.252616  | 0.441107  |
| 6                                                            | -0.680995 | 0.236432  | -0.535190 |
| 6                                                            | -1.781153 | -2.805845 | 0.134148  |
| 16                                                           |           |           |           |
| 128.844783 Kcal/mol 5.587246 eV -101.178353 H MutI_16_35.log |           |           |           |
| 6                                                            | -3.436738 | -0.164667 | -0.122529 |
| 6                                                            | 1.806345  | -1.395678 | 1.769576  |
| 6                                                            | -5.472260 | 0.979602  | 1.026608  |
| 8                                                            | 1.067463  | -0.368086 | -1.570108 |
| 12                                                           | 0.631434  | -2.275890 | -0.546166 |
| 6                                                            | 1.768815  | 1.167067  | 2.170515  |
| 6                                                            | -4.501017 | 0.355341  | 0.426213  |
| 6                                                            | 1.891406  | -0.073953 | 2.122864  |
| 6                                                            | 2.027333  | 0.598121  | -1.583822 |
| 6                                                            | -0.205982 | 0.117980  | -1.027116 |
| 12                                                           | 1.484404  | 2.143909  | 0.389139  |
| 6                                                            | 1.612163  | -2.494095 | 1.201600  |
| 6                                                            | -1.118435 | -1.008575 | -0.899633 |
| 6                                                            | -2.371351 | -0.691082 | -0.576191 |
| 8                                                            | -0.184339 | 1.250501  | -0.531011 |
| 6                                                            | 2.590548  | 1.697346  | -1.392537 |
| 16                                                           |           |           |           |
| 128.878615 Kcal/mol 5.588713 eV -101.178299 H MutI_10_79.log |           |           |           |
| 6                                                            | 3.198801  | 1.103688  | 0.528704  |
| 6                                                            | -4.806347 | 1.569305  | 0.228474  |
| 8                                                            | -5.631383 | 2.418139  | 0.394988  |
| 12                                                           | 5.777236  | 1.067184  | -1.046869 |
| 12                                                           | -1.235693 | -2.814734 | -0.429049 |
| 6                                                            | 4.414561  | 1.423130  | 0.528951  |
| 6                                                            | 1.963705  | 0.555291  | 0.598112  |
| 6                                                            | -4.160827 | 0.468897  | 0.043942  |
| 8                                                            | 1.985701  | -0.709904 | 1.325545  |
| 6                                                            | 0.491657  | -2.614444 | 0.518864  |
| 6                                                            | -1.623477 | 0.110296  | -0.760357 |
| 6                                                            | -3.041854 | 0.005710  | -0.533163 |
| 6                                                            | 0.765656  | 0.816243  | -0.029788 |
| 6                                                            | 1.233152  | -1.708764 | 0.927212  |
| 6                                                            | -0.387436 | 0.606428  | -0.436682 |
| 6                                                            | -2.269768 | -1.118327 | -0.956475 |
| 16                                                           |           |           |           |
| 129.012435 Kcal/mol 5.594516 eV -101.178086 H Child_7_20.log |           |           |           |
| 6                                                            | 5.098019  | -1.028228 | -0.006227 |
| 8                                                            | -4.723768 | -0.133385 | 0.002611  |
| 6                                                            | 3.487909  | 1.278434  | 0.002866  |
| 6                                                            | -3.931016 | -1.277824 | 0.007733  |
| 6                                                            | 4.117227  | 0.049452  | 0.000439  |
| 6                                                            | -3.908485 | 0.903943  | -0.002623 |
| 6                                                            | 2.643455  | 2.192729  | 0.004211  |
| 6                                                            | -2.871820 | -1.913843 | -0.005229 |
| 6                                                            | 3.652623  | -1.235586 | 0.000611  |
| 6                                                            | -2.808156 | 1.448226  | -0.002127 |
| 12                                                           | 0.627355  | 2.129814  | 0.000498  |

|                                                               |           |           |           |
|---------------------------------------------------------------|-----------|-----------|-----------|
| 6                                                             | -1.439893 | 1.676259  | -0.003295 |
| 6                                                             | 2.398050  | -1.811450 | 0.002972  |
| 12                                                            | -0.821931 | -1.527560 | -0.001726 |
| 6                                                             | 1.175776  | -2.030838 | 0.003527  |
| 8                                                             | -0.694633 | 0.541548  | -0.002912 |
| 16                                                            |           |           |           |
| 129.118367 Kcal/mol 5.599109 eV -101.177917 H Child_3_35.log  |           |           |           |
| 6                                                             | -0.858352 | 2.210601  | -0.816763 |
| 6                                                             | 1.784143  | -1.042537 | 0.994456  |
| 6                                                             | -1.266414 | 2.261594  | 0.569932  |
| 6                                                             | 4.717807  | 1.600931  | -0.338936 |
| 6                                                             | -2.363876 | 1.798896  | 1.242078  |
| 8                                                             | 4.847994  | 0.674509  | -1.015834 |
| 6                                                             | 0.089908  | 2.138389  | 0.212246  |
| 6                                                             | 1.118611  | -2.037320 | 0.649186  |
| 12                                                            | -2.352707 | 0.929974  | -1.660289 |
| 6                                                             | 0.144245  | -2.908461 | 0.062413  |
| 6                                                             | -2.877998 | 0.697242  | 0.760380  |
| 6                                                             | -1.160166 | -2.318369 | 0.109130  |
| 6                                                             | -2.903386 | -0.368265 | -0.087784 |
| 6                                                             | -2.042981 | -1.461192 | 0.057433  |
| 12                                                            | 1.657978  | 0.985813  | 0.977675  |
| 8                                                             | 0.407946  | -3.976821 | -0.520573 |
| 16                                                            |           |           |           |
| 129.165356 Kcal/mol 5.601147 eV -101.177842 H Child_18_28.log |           |           |           |
| 8                                                             | -7.399950 | 0.637701  | 0.116323  |
| 6                                                             | 5.481534  | 0.656887  | 0.555555  |
| 6                                                             | -6.280547 | 0.230677  | 0.147578  |
| 12                                                            | 4.494555  | -1.218317 | 0.213597  |
| 6                                                             | -5.072019 | -0.208213 | 0.187922  |
| 6                                                             | 4.383080  | 1.241928  | 0.291724  |
| 8                                                             | -0.489690 | 2.672235  | -0.217217 |
| 6                                                             | 0.579616  | 2.142438  | -0.194973 |
| 6                                                             | 2.415070  | -1.323933 | -0.311749 |
| 6                                                             | -3.889606 | -0.664435 | 0.160840  |
| 12                                                            | 0.491125  | -1.992663 | -0.260869 |
| 6                                                             | 1.682472  | 1.446383  | -0.196384 |
| 6                                                             | 2.356938  | 0.025442  | -0.338178 |
| 6                                                             | 3.063937  | 1.207801  | -0.110962 |
| 6                                                             | -1.498315 | -1.592541 | -0.035791 |
| 6                                                             | -2.674000 | -1.153722 | 0.073489  |
| 16                                                            |           |           |           |
| 129.284949 Kcal/mol 5.606333 eV -101.177652 H MutD_18_34.log  |           |           |           |
| 8                                                             | 9.189880  | 0.382251  | -1.148893 |
| 6                                                             | 0.756402  | -1.617202 | 0.846185  |
| 6                                                             | -2.364886 | -1.552605 | -0.201214 |
| 6                                                             | 1.423621  | 0.853584  | 1.090170  |
| 6                                                             | -5.926750 | -0.701308 | -1.346715 |
| 6                                                             | -0.108106 | -2.724130 | 0.543820  |
| 6                                                             | -3.336862 | -0.630048 | -0.519084 |
| 6                                                             | 1.199759  | -0.484000 | 1.002958  |
| 12                                                            | -0.160070 | 3.373980  | 0.574047  |
| 6                                                             | 1.376636  | 2.098751  | 1.079926  |
| 6                                                             | -3.655910 | 0.660738  | -0.622132 |
| 12                                                            | -2.727505 | 2.522544  | -0.289763 |

|                                                              |           |           |           |
|--------------------------------------------------------------|-----------|-----------|-----------|
| 6                                                            | -1.390740 | -2.219308 | 0.121609  |
| 6                                                            | 10.019151 | -0.378307 | -0.911377 |
| 6                                                            | -4.726491 | -0.371708 | -0.959007 |
| 8                                                            | 0.192113  | -3.927879 | 0.628612  |
| 16                                                           |           |           |           |
| 129.479189 Kcal/mol 5.614756 eV -101.177342 H Child_3_16.log |           |           |           |
| 8                                                            | -5.719609 | -1.080306 | -0.156242 |
| 8                                                            | 5.125336  | -0.650865 | -0.887851 |
| 6                                                            | -4.607953 | -0.841391 | -0.161186 |
| 6                                                            | 3.982215  | -0.654883 | -0.611350 |
| 6                                                            | -2.125566 | 1.884749  | -0.833933 |
| 6                                                            | 2.691958  | -0.626735 | -0.226324 |
| 6                                                            | -0.917424 | 2.236798  | -0.784004 |
| 6                                                            | 1.763557  | -1.591250 | -0.590431 |
| 6                                                            | 0.413216  | 2.138606  | -0.497836 |
| 6                                                            | 2.151930  | 0.551667  | 0.653384  |
| 12                                                           | -2.510440 | -0.090480 | -0.387065 |
| 6                                                            | 0.465449  | -1.512164 | -0.210943 |
| 6                                                            | 1.413600  | 1.548825  | -0.065288 |
| 6                                                            | 1.876392  | 0.328474  | 1.957664  |
| 12                                                           | -0.262932 | 0.115518  | 1.797516  |
| 6                                                            | -0.768267 | -1.204546 | -0.058531 |
| 16                                                           |           |           |           |
| 129.767041 Kcal/mol 5.627239 eV -101.176883 H MutD_3_78.log  |           |           |           |
| 6                                                            | -1.150371 | 1.313833  | 0.140214  |
| 6                                                            | 4.055715  | 0.809774  | -0.563594 |
| 6                                                            | -3.390573 | -0.996810 | -0.311243 |
| 12                                                           | -0.859204 | -1.732046 | -0.294044 |
| 6                                                            | 2.235443  | 2.434222  | 0.211708  |
| 12                                                           | 3.186100  | -1.113533 | -0.645875 |
| 6                                                            | -0.238515 | 2.271167  | 0.430524  |
| 6                                                            | 3.297151  | 1.754862  | -0.161285 |
| 6                                                            | -2.916255 | -2.138442 | -0.540993 |
| 8                                                            | 1.581175  | -2.758492 | 1.451888  |
| 8                                                            | -0.623455 | 0.118306  | -0.148790 |
| 6                                                            | -3.972272 | 1.756623  | 0.113588  |
| 6                                                            | 0.991479  | 2.626900  | 0.402635  |
| 6                                                            | -2.586209 | 1.354809  | 0.125737  |
| 6                                                            | -3.493869 | 0.363463  | -0.087306 |
| 6                                                            | 1.237523  | -2.338994 | 0.382387  |
| 16                                                           |           |           |           |
| 129.958522 Kcal/mol 5.635542 eV -101.176578 H Child_2_15.log |           |           |           |
| 8                                                            | 3.682829  | -2.259956 | -0.150227 |
| 6                                                            | -5.503316 | -2.136807 | -0.269838 |
| 6                                                            | 2.395215  | -2.241528 | 0.046456  |
| 6                                                            | -4.422619 | -1.414248 | -0.155078 |
| 6                                                            | 1.193282  | -1.952570 | 0.171472  |
| 12                                                           | 0.844023  | 2.919809  | -0.202838 |
| 6                                                            | 0.412167  | -0.798290 | 0.302760  |
| 8                                                            | -2.439209 | 1.513409  | -0.070377 |
| 12                                                           | 3.639628  | -0.263957 | -0.216831 |
| 6                                                            | -3.360287 | -0.700220 | -0.043500 |
| 6                                                            | -0.877533 | -0.211319 | 0.317212  |
| 6                                                            | -1.139610 | 2.136111  | 0.051738  |
| 6                                                            | 1.061061  | 0.589444  | 0.280372  |



|                                                                   |           |           |           |
|-------------------------------------------------------------------|-----------|-----------|-----------|
| 6                                                                 | -2.274073 | 0.049088  | 0.071212  |
| 6                                                                 | 2.220607  | 1.250072  | -0.002829 |
| 6                                                                 | -0.330355 | 1.113958  | 0.363497  |
| 16                                                                |           |           |           |
| 130.105530 Kcal/mol 5.641917 eV -101.176344 H Child_4_61.log      |           |           |           |
| 6                                                                 | 0.041400  | 2.529009  | -1.216847 |
| 8                                                                 | 4.398519  | -0.781037 | 1.187636  |
| 12                                                                | 2.062246  | 2.191093  | -1.161988 |
| 6                                                                 | 2.034989  | -1.291484 | 0.402669  |
| 6                                                                 | -0.215540 | 1.436568  | -0.646517 |
| 12                                                                | 0.472462  | -2.527877 | -0.320612 |
| 8                                                                 | -3.913271 | 2.255515  | 1.617099  |
| 6                                                                 | -4.714016 | -1.883613 | -0.725077 |
| 6                                                                 | -3.070847 | 1.557921  | 1.263880  |
| 6                                                                 | 3.272144  | -0.547501 | 0.764933  |
| 6                                                                 | -0.084849 | 0.158587  | -0.025428 |
| 6                                                                 | -3.492012 | -1.525891 | -0.540397 |
| 6                                                                 | 2.518597  | 0.546100  | 0.114368  |
| 6                                                                 | -2.233545 | -1.207398 | -0.377947 |
| 6                                                                 | 1.214321  | -0.094525 | 0.366812  |
| 6                                                                 | -0.987054 | -0.970175 | -0.154897 |
| 16                                                                |           |           |           |
| 130.504215 Kcal/mol 5.659205 eV -101.175709 H Child_9_40.log      |           |           |           |
| 6                                                                 | -1.024105 | 2.969114  | 0.777123  |
| 6                                                                 | -4.344607 | -1.190161 | 1.608588  |
| 8                                                                 | -1.289118 | 2.199991  | -0.055994 |
| 6                                                                 | -1.553318 | -0.978277 | 1.195877  |
| 6                                                                 | 4.121424  | 0.363645  | 0.502948  |
| 6                                                                 | -2.928555 | -1.061255 | 1.267461  |
| 8                                                                 | 3.786597  | 1.216300  | 1.304471  |
| 6                                                                 | -0.475045 | -0.759635 | 0.614023  |
| 12                                                                | -1.101276 | 0.480130  | -1.460319 |
| 12                                                                | 5.086636  | -1.174079 | -0.525108 |
| 6                                                                 | -3.860172 | -0.806418 | 0.288764  |
| 6                                                                 | -3.038888 | -0.028415 | -2.040909 |
| 6                                                                 | 0.508912  | -0.294528 | -0.263128 |
| 6                                                                 | 3.120813  | -0.546800 | -0.351276 |
| 6                                                                 | 1.818029  | -0.431883 | -0.284669 |
| 6                                                                 | -3.645179 | -0.402541 | -1.008581 |
| 16                                                                |           |           |           |
| 130.526548 Kcal/mol 5.660174 eV -101.175673 H Original2D_16_2.log |           |           |           |
| 6                                                                 | -0.056967 | 1.981912  | -0.000000 |
| 6                                                                 | -1.231879 | 1.221167  | 0.000000  |
| 12                                                                | -3.318700 | 3.071744  | 0.000000  |
| 6                                                                 | 1.260577  | 1.585072  | -0.000000 |
| 6                                                                 | 2.175154  | 0.759059  | -0.000000 |
| 6                                                                 | -1.731655 | -0.077802 | 0.000000  |
| 8                                                                 | 2.970767  | -0.257792 | -0.000000 |
| 6                                                                 | -1.260670 | 2.689853  | -0.000000 |
| 6                                                                 | -3.991780 | 0.803084  | 0.000000  |
| 6                                                                 | 2.168190  | -1.679002 | -0.000000 |
| 6                                                                 | -3.132069 | -0.256693 | 0.000000  |
| 12                                                                | -0.000000 | -1.268356 | 0.000000  |
| 6                                                                 | -4.932249 | 1.699213  | 0.000000  |
| 6                                                                 | 3.977944  | -3.513059 | -0.000000 |

|                                                              |           |           |           |
|--------------------------------------------------------------|-----------|-----------|-----------|
| 8                                                            | 4.830839  | -4.337480 | -0.000000 |
| 6                                                            | 2.990664  | -2.692548 | -0.000000 |
| 16                                                           |           |           |           |
| 130.572866 Kcal/mol 5.662183 eV -101.175599 H MutD_18_66.log |           |           |           |
| 12                                                           | 1.639065  | -2.784753 | 0.195664  |
| 6                                                            | -2.890920 | 0.470924  | 0.492363  |
| 6                                                            | -7.829632 | -0.681532 | -0.372547 |
| 6                                                            | -4.131507 | 0.208439  | 0.337919  |
| 6                                                            | -1.630075 | 0.721421  | 0.620913  |
| 6                                                            | 2.533023  | -0.279724 | -1.498398 |
| 8                                                            | 3.279961  | 1.102312  | 1.388488  |
| 6                                                            | 3.208876  | -1.253601 | -0.855293 |
| 6                                                            | 0.856247  | 1.136161  | 1.010237  |
| 6                                                            | 1.865904  | 0.697668  | -1.998111 |
| 6                                                            | -0.400638 | 0.920831  | 0.718153  |
| 6                                                            | 2.086262  | 1.120568  | 1.160899  |
| 6                                                            | -6.611725 | -0.390974 | -0.052152 |
| 6                                                            | -5.362345 | -0.085057 | 0.164203  |
| 8                                                            | 1.100203  | 1.532959  | -2.374147 |
| 12                                                           | 4.594091  | -0.264657 | 0.597349  |
| 16                                                           |           |           |           |
| 130.672875 Kcal/mol 5.666519 eV -101.175440 H MutD_7_72.log  |           |           |           |
| 8                                                            | -3.143025 | 3.016198  | 0.947652  |
| 12                                                           | 1.550095  | -1.635227 | 0.685752  |
| 8                                                            | -2.882505 | -1.383221 | -0.643748 |
| 6                                                            | 6.451052  | 1.223319  | -0.631326 |
| 6                                                            | 4.586337  | -0.459381 | 0.051423  |
| 6                                                            | 7.295336  | 2.159440  | -0.981864 |
| 6                                                            | -2.457093 | 0.657077  | 0.430251  |
| 6                                                            | -4.465514 | 0.362927  | -0.985270 |
| 6                                                            | -0.161912 | -0.505467 | 1.055775  |
| 6                                                            | -2.831578 | 1.910021  | 0.696363  |
| 6                                                            | 5.526649  | 0.409442  | -0.271475 |
| 6                                                            | -5.501821 | 0.931309  | -1.468231 |
| 12                                                           | -1.241821 | -2.250291 | -0.261593 |
| 6                                                            | 3.527060  | -1.055632 | 0.428708  |
| 6                                                            | -1.219287 | 0.132897  | 0.870237  |
| 6                                                            | -3.331735 | -0.172219 | -0.448114 |
| 16                                                           |           |           |           |
| 130.728092 Kcal/mol 5.668914 eV -101.175352 H MutD_5_68.log  |           |           |           |
| 8                                                            | 2.912201  | -0.025743 | -0.155965 |
| 6                                                            | -5.488035 | -1.258966 | -0.112502 |
| 6                                                            | -0.656793 | -0.578605 | 0.128512  |
| 12                                                           | 2.739742  | 1.771502  | -0.289515 |
| 6                                                            | -6.628169 | -1.846441 | -0.254338 |
| 8                                                            | 1.535245  | -1.846765 | 0.140990  |
| 6                                                            | 4.881725  | -2.972092 | 0.117685  |
| 6                                                            | 3.870000  | -2.202751 | -0.003802 |
| 6                                                            | -3.080612 | -0.348527 | 0.007388  |
| 6                                                            | 0.467402  | -1.077161 | 0.139549  |
| 6                                                            | -1.853114 | 0.151941  | 0.137373  |
| 12                                                           | -1.485485 | 2.249106  | 0.280299  |
| 6                                                            | 1.353437  | 3.194499  | -0.096671 |
| 6                                                            | -4.300624 | -0.711248 | -0.081435 |
| 6                                                            | 0.136387  | 3.425474  | 0.077734  |

|                                                               |           |           |           |
|---------------------------------------------------------------|-----------|-----------|-----------|
| 6                                                             | 2.859953  | -1.320661 | -0.021094 |
| 16                                                            |           |           |           |
| 130.831381 Kcal/mol 5.673393 eV -101.175187 H MutD_14_64.log  |           |           |           |
| 6                                                             | 1.763381  | 0.087430  | 0.187389  |
| 6                                                             | -4.912222 | -1.427548 | -0.068087 |
| 6                                                             | 1.751521  | 3.892311  | -0.403108 |
| 6                                                             | 2.837255  | -0.650993 | 0.162630  |
| 8                                                             | -0.109773 | 1.475002  | 0.066450  |
| 6                                                             | -6.129773 | -0.678757 | -0.099237 |
| 6                                                             | 3.786673  | -1.505052 | 0.139825  |
| 12                                                            | -0.418352 | 3.454954  | 0.095093  |
| 6                                                             | -3.559005 | -1.411475 | 0.075290  |
| 8                                                             | 5.378833  | -3.341590 | -0.266148 |
| 6                                                             | 1.295745  | 1.363465  | 0.000279  |
| 12                                                            | -0.497201 | -0.442409 | 0.245228  |
| 6                                                             | 1.836641  | 2.642869  | -0.202544 |
| 6                                                             | 4.613093  | -2.464623 | -0.061925 |
| 6                                                             | -2.320206 | -1.323239 | 0.186848  |
| 6                                                             | -6.157411 | -2.060693 | -0.331739 |
| 16                                                            |           |           |           |
| 130.905860 Kcal/mol 5.676623 eV -101.175069 H Child_9_33.log  |           |           |           |
| 8                                                             | 4.793653  | -1.951575 | 1.354905  |
| 8                                                             | -8.142912 | -0.200881 | 0.540996  |
| 6                                                             | 3.986474  | -1.379036 | 0.696251  |
| 6                                                             | -7.921293 | 0.588053  | -0.266384 |
| 6                                                             | 1.533121  | 3.667202  | 0.158600  |
| 6                                                             | -1.798378 | -2.697629 | -0.577120 |
| 6                                                             | 3.288747  | -0.568792 | -0.012630 |
| 6                                                             | -1.756628 | -1.382708 | -0.037364 |
| 6                                                             | 0.520335  | 2.958305  | 0.412466  |
| 6                                                             | -1.627140 | -0.206017 | 0.339385  |
| 12                                                            | 2.657589  | 2.260131  | -0.837295 |
| 6                                                             | -0.488042 | -2.696407 | -0.614142 |
| 6                                                             | -0.464115 | 2.051016  | 0.582027  |
| 6                                                             | -1.137830 | 1.035640  | 0.525985  |
| 6                                                             | 2.489281  | 0.128211  | -0.830130 |
| 12                                                            | 1.262983  | -1.574079 | -0.615111 |
| 16                                                            |           |           |           |
| 131.016955 Kcal/mol 5.681440 eV -101.174892 H Child_11_63.log |           |           |           |
| 6                                                             | -1.326696 | 2.302129  | -0.109903 |
| 12                                                            | -3.179605 | -1.763694 | 0.112061  |
| 12                                                            | 0.610230  | 1.687830  | 0.207248  |
| 8                                                             | -1.360222 | -1.860702 | 0.053426  |
| 6                                                             | -2.541669 | 1.973000  | -0.238122 |
| 6                                                             | -0.151162 | -1.446883 | 0.101498  |
| 8                                                             | 3.933698  | 1.165365  | 0.155819  |
| 6                                                             | 2.537200  | 0.902392  | 0.316942  |
| 6                                                             | -5.010840 | -0.725473 | 0.015545  |
| 6                                                             | 0.984120  | -0.977250 | 0.157679  |
| 6                                                             | 4.476152  | -0.056080 | -0.157780 |
| 6                                                             | -4.382809 | 0.392923  | -0.160763 |
| 6                                                             | 5.061064  | -1.342070 | -0.471406 |
| 6                                                             | -3.832814 | 1.604784  | -0.270301 |
| 6                                                             | 3.580974  | -1.085722 | -0.230954 |
| 6                                                             | 2.313926  | -0.462905 | 0.129954  |

```

16
131.025167 Kcal/mol 5.681796 eV -101.174879 H MutD_2_76.log
8   1.345774   -2.226345   -0.380301
6   4.321150   2.901485    1.259908
6   0.336716   -1.299075   -0.689737
6   2.960500   0.931226    0.264513
6   -1.066208  1.724897    -1.155451
8   3.483417   -2.135331    0.482010
6   -4.195046  -0.381391    1.198286
6   3.642935   1.912185    0.727197
12  -1.767132   -1.176756   -0.558834
6   -4.897951  -0.621405    2.279500
6   2.536059   -1.523724    0.024764
12  -3.033853   1.824849    -0.656638
6   -3.486961  -0.084655    0.117673
6   -0.045462  1.055088    -0.923145
6   0.841367   -0.019396   -0.652063
6   2.215953   -0.075852   -0.156112
16
131.031267 Kcal/mol 5.682061 eV -101.174869 H Child_4_60.log
6   -3.203288  -2.218808   -0.113430
6   -4.328297  1.871158    -0.121659
6   -1.838383  -1.995985    0.195716
6   -3.210888  2.351082    0.144680
6   0.377508   -2.293700   -0.182748
12  4.688792   2.720581    -0.408052
12  0.172190   0.067859    0.235054
6   -4.982413  0.720587    -0.366276
6   -4.270386  -1.623230   -0.333746
6   -1.872637  2.410911    0.373909
6   -0.697028  -2.830305    0.204381
6   -0.700036  1.983292    0.492617
6   9.424359   -1.440729   -0.528752
6   -5.041006  -0.515057   -0.463563
8   9.525202   -0.767391    0.403414
8   -1.559806  -0.729680    0.380236
16
131.570797 Kcal/mol 5.705457 eV -101.174009 H MutD_17_56.log
6   -0.080876  2.064353    -0.077640
6   1.734970   0.314791    -0.193032
6   2.606891   1.474826    -0.005720
6   2.327396   -2.025010   -0.095499
6   -1.303294  1.910164    -0.014999
8   -6.367611  -0.987490    0.301012
6   -2.726092  -0.053179   -0.087301
6   -3.977905  -0.411062    0.021766
12  4.485428   0.606348    0.232147
6   4.891484   -1.447154    0.317138
6   -5.228806  -0.671426    0.165653
8   -2.542575  1.537068    0.044771
6   1.327744   -1.028677   -0.287870
12  -0.759630  -1.019314   -0.331095
6   3.633836   -1.653893    0.091557
6   1.223303   1.619430    -0.097202
16

```

131.739658 Kcal/mol 5.712779 eV -101.173740 H Child\_4\_17.log

|    |           |           |           |
|----|-----------|-----------|-----------|
| 12 | 0.355999  | 3.280708  | 0.046812  |
| 6  | -2.570554 | -2.952191 | -0.001424 |
| 6  | -1.672808 | 3.477963  | 0.009940  |
| 12 | -0.581007 | -3.280166 | 0.041102  |
| 6  | 2.149725  | 2.323680  | 0.051250  |
| 6  | -3.287685 | -1.916772 | -0.026142 |
| 6  | 3.129452  | 1.554525  | 0.030132  |
| 8  | 1.147514  | -2.780896 | 0.060121  |
| 6  | -2.661776 | 2.696829  | -0.009344 |
| 8  | 4.242514  | -0.496570 | -0.087012 |
| 6  | 4.352490  | 0.865365  | -0.067769 |
| 6  | 3.082117  | -1.201784 | -0.025649 |
| 6  | 2.188901  | -2.020193 | 0.016456  |
| 6  | -3.647755 | 1.789862  | -0.033550 |
| 6  | -3.963467 | -0.763356 | -0.048882 |
| 6  | -3.835327 | 0.514942  | -0.034989 |

16

131.802472 Kcal/mol 5.715503 eV -101.173640 H Child\_4\_35.log

|    |           |           |           |
|----|-----------|-----------|-----------|
| 6  | 3.754313  | -0.758826 | 2.314471  |
| 8  | -3.380048 | -2.128162 | -0.497862 |
| 6  | 3.027574  | -0.172387 | 1.451853  |
| 6  | -1.005560 | -1.936352 | -0.310804 |
| 6  | 2.258308  | 0.558916  | 0.528210  |
| 6  | -2.357385 | -1.484174 | -0.187638 |
| 8  | -3.952361 | 2.012504  | 0.447446  |
| 6  | 0.210732  | -2.112050 | -0.482340 |
| 6  | 2.702591  | 0.574187  | -0.819150 |
| 6  | -2.439421 | -0.090197 | 0.269757  |
| 12 | 1.672153  | 2.102224  | -1.885600 |
| 6  | -1.604478 | 0.914589  | 0.661677  |
| 6  | 0.943380  | 1.094176  | 0.798154  |
| 12 | 2.118185  | -1.487618 | -0.867350 |
| 6  | -3.028516 | 1.202326  | 0.469561  |
| 6  | -0.265669 | 1.134792  | 0.879370  |

16

132.440902 Kcal/mol 5.743188 eV -101.172622 H Child\_9\_58.log

|    |           |           |           |
|----|-----------|-----------|-----------|
| 8  | -4.244991 | -0.171076 | -0.822658 |
| 6  | 4.562142  | 0.946584  | -0.353785 |
| 6  | -4.317563 | -0.625005 | 0.505196  |
| 6  | 3.828596  | 0.822207  | 0.675435  |
| 6  | -2.165337 | 1.184461  | -1.517627 |
| 6  | 2.796340  | 0.722051  | 1.559056  |
| 6  | -3.187126 | 0.552995  | -1.246599 |
| 6  | -2.163882 | 0.057889  | 1.826408  |
| 8  | 1.214254  | -4.104573 | -0.484911 |
| 6  | 1.645309  | 0.652654  | 2.028270  |
| 6  | 1.910353  | -4.881329 | -0.968697 |
| 6  | 0.334775  | 0.492554  | 2.254040  |
| 6  | -3.217472 | -0.205980 | 1.225569  |
| 6  | -0.899490 | 0.350648  | 2.131414  |
| 12 | -0.185805 | 1.625852  | -1.792330 |
| 12 | 2.642973  | 1.189715  | -1.395296 |

16

132.458101 Kcal/mol 5.743934 eV -101.172595 H Child\_5\_29.log

|                                                              |           |           |           |
|--------------------------------------------------------------|-----------|-----------|-----------|
| 6                                                            | -3.211409 | 3.311059  | -0.244702 |
| 6                                                            | 0.488905  | -3.471413 | 0.038601  |
| 6                                                            | -1.999867 | 2.518058  | -0.333717 |
| 8                                                            | 1.812536  | -3.478472 | -0.164755 |
| 6                                                            | -0.643863 | 2.338561  | -0.513461 |
| 6                                                            | -0.692747 | -3.218823 | 0.172438  |
| 6                                                            | 4.101805  | 2.868204  | 1.317157  |
| 6                                                            | -1.947596 | -2.703796 | 0.317827  |
| 6                                                            | 0.563544  | 2.072006  | -0.629225 |
| 6                                                            | 2.345060  | -2.244517 | -0.344002 |
| 6                                                            | -3.172601 | 1.876352  | 0.016160  |
| 6                                                            | -2.988643 | -2.033844 | 0.403835  |
| 8                                                            | 3.580095  | 2.125892  | 0.603025  |
| 6                                                            | 2.694931  | -1.072058 | -0.485122 |
| 12                                                           | 2.222717  | 0.889742  | -0.541975 |
| 12                                                           | -3.586564 | -0.107917 | 0.391899  |
| 16                                                           |           |           |           |
| 132.510885 Kcal/mol 5.746223 eV -101.172511 H Child_5_54.log |           |           |           |
| 6                                                            | 5.034773  | -1.404136 | -1.101180 |
| 6                                                            | -0.740848 | -2.984882 | 0.973703  |
| 6                                                            | 1.188008  | 0.894103  | -2.943484 |
| 6                                                            | -0.076929 | -2.104694 | 1.555894  |
| 6                                                            | 0.506816  | 1.213077  | -1.883307 |
| 6                                                            | 0.527255  | -0.977243 | 2.040284  |
| 8                                                            | 5.274243  | -0.549130 | -0.373239 |
| 6                                                            | 0.925423  | 0.173850  | 2.296818  |
| 6                                                            | -0.011097 | 1.649866  | -0.751865 |
| 12                                                           | -2.158883 | -2.781784 | -0.421498 |
| 6                                                            | -1.315511 | 1.977593  | -0.128382 |
| 12                                                           | 0.508784  | 1.998000  | 1.497029  |
| 6                                                            | -2.298136 | 1.258725  | -0.662362 |
| 6                                                            | -3.060932 | -1.129429 | -1.277894 |
| 8                                                            | -1.242547 | 2.742557  | 0.959939  |
| 6                                                            | -2.754218 | 0.076166  | -1.051553 |
| 16                                                           |           |           |           |
| 132.678573 Kcal/mol 5.753495 eV -101.172244 H Child_3_24.log |           |           |           |
| 6                                                            | 3.238424  | 0.130303  | 0.629462  |
| 6                                                            | -3.642428 | -3.123580 | -0.047150 |
| 12                                                           | 3.332056  | -1.874941 | 0.050710  |
| 6                                                            | -3.069752 | -1.973955 | 0.002735  |
| 8                                                            | 1.952694  | 2.057823  | -0.393941 |
| 6                                                            | -0.896359 | -0.896083 | 0.148781  |
| 6                                                            | 2.365216  | 0.854412  | -0.085256 |
| 6                                                            | -2.355491 | -0.816981 | 0.092182  |
| 12                                                           | 0.018395  | 2.258349  | -0.035652 |
| 6                                                            | 0.045565  | -1.782044 | -0.354901 |
| 6                                                            | 1.377978  | -0.302423 | 0.038638  |
| 6                                                            | -2.826405 | 0.510487  | 0.120361  |
| 8                                                            | -1.876463 | 2.827138  | -0.034917 |
| 6                                                            | 0.045844  | 0.145903  | 0.405312  |
| 6                                                            | 1.379530  | -1.719577 | -0.460483 |
| 6                                                            | -2.464664 | 1.693441  | 0.052015  |
| 16                                                           |           |           |           |
| 132.751368 Kcal/mol 5.756651 eV -101.172128 H MutD_1_64.log  |           |           |           |
| 8                                                            | 0.391014  | 1.949431  | 0.004034  |

|                                                               |           |           |           |
|---------------------------------------------------------------|-----------|-----------|-----------|
| 6                                                             | 0.632759  | -1.444053 | -0.071229 |
| 6                                                             | -3.159200 | 1.872939  | 0.004232  |
| 8                                                             | -1.923894 | 2.481335  | 0.007078  |
| 6                                                             | -3.686858 | -0.577090 | 0.002356  |
| 12                                                            | 1.853950  | 0.701734  | -0.008472 |
| 6                                                             | -1.344768 | 0.280810  | -0.044626 |
| 6                                                             | 6.147410  | 0.428170  | 0.073300  |
| 6                                                             | -0.837822 | 1.566535  | -0.013053 |
| 12                                                            | 2.546901  | -2.242275 | -0.027568 |
| 6                                                             | 4.916383  | -0.031558 | 0.047937  |
| 6                                                             | -2.790031 | 0.395294  | -0.020327 |
| 6                                                             | -0.419619 | -0.769747 | -0.065193 |
| 6                                                             | -4.554214 | -1.520537 | 0.037310  |
| 6                                                             | 3.674849  | -0.467907 | 0.016901  |
| 6                                                             | -5.336750 | -2.559463 | 0.089656  |
| 16                                                            |           |           |           |
| 133.030911 Kcal/mol 5.768774 eV -101.171682 H Child_8_22.log  |           |           |           |
| 8                                                             | -0.960213 | -3.505303 | 0.059210  |
| 6                                                             | 4.989430  | 0.242920  | 0.479136  |
| 6                                                             | -0.784934 | -2.278137 | 0.217727  |
| 8                                                             | 3.949843  | 0.779988  | 0.477908  |
| 6                                                             | 1.830425  | -1.744038 | -0.650778 |
| 6                                                             | -1.989447 | 2.607002  | -0.258206 |
| 6                                                             | 0.506814  | -1.625254 | -0.030135 |
| 6                                                             | 1.167341  | -0.499252 | 0.153419  |
| 6                                                             | 2.985571  | -1.842762 | -1.218445 |
| 12                                                            | 1.921346  | 1.438096  | 0.185849  |
| 12                                                            | -2.582000 | -1.162994 | 0.522715  |
| 6                                                             | -2.998098 | 1.882513  | -0.285712 |
| 6                                                             | -4.412245 | -0.299452 | 0.025431  |
| 6                                                             | -0.679183 | 2.935581  | -0.242652 |
| 6                                                             | -3.836918 | 0.816057  | -0.169885 |
| 6                                                             | 0.556377  | 2.888369  | -0.153189 |
| 16                                                            |           |           |           |
| 133.072127 Kcal/mol 5.770561 eV -101.171617 H Child_10_17.log |           |           |           |
| 6                                                             | 1.952451  | 2.953589  | 0.057913  |
| 12                                                            | -3.421088 | -1.208653 | -0.067458 |
| 6                                                             | 2.533836  | 1.760535  | 0.001521  |
| 6                                                             | -1.353451 | -1.259500 | 0.121215  |
| 8                                                             | 3.843479  | 1.145784  | -0.162191 |
| 6                                                             | -4.233122 | 0.631461  | -0.189444 |
| 6                                                             | 1.868126  | 0.442050  | 0.115212  |
| 6                                                             | 3.211680  | -1.496038 | -0.139409 |
| 6                                                             | 3.132115  | -0.138820 | -0.038449 |
| 6                                                             | -3.975399 | 1.865293  | -0.090767 |
| 6                                                             | 0.693490  | -0.294559 | 0.153689  |
| 6                                                             | 0.848067  | -1.715087 | 0.051569  |
| 6                                                             | -0.726000 | -0.025514 | 0.190592  |
| 6                                                             | 2.139551  | -2.170341 | -0.065546 |
| 12                                                            | -1.914904 | 1.709005  | 0.063082  |
| 8                                                             | -0.407998 | -2.311112 | 0.042683  |
| 16                                                            |           |           |           |
| 133.259076 Kcal/mol 5.778668 eV -101.171319 H MutD_18_50.log  |           |           |           |
| 6                                                             | -0.888959 | 2.322855  | -0.009027 |
| 6                                                             | -5.341711 | -0.135882 | 0.002784  |

|                                                                   |           |           |           |
|-------------------------------------------------------------------|-----------|-----------|-----------|
| 8                                                                 | 7.349994  | -0.856421 | -0.011160 |
| 6                                                                 | -3.320412 | 1.556464  | 0.008897  |
| 6                                                                 | -1.213399 | -1.560116 | 0.029164  |
| 6                                                                 | 0.394242  | 1.971330  | -0.010378 |
| 12                                                                | 0.742732  | -0.900340 | 0.021075  |
| 6                                                                 | 6.203461  | -0.533999 | -0.006722 |
| 6                                                                 | -2.122475 | 2.118681  | 0.001321  |
| 6                                                                 | 2.482355  | 0.441919  | 0.006444  |
| 6                                                                 | 4.975379  | -0.194491 | -0.005089 |
| 8                                                                 | -5.241570 | -1.452937 | -0.019367 |
| 6                                                                 | 1.504740  | 1.391583  | -0.004262 |
| 6                                                                 | -4.170437 | 0.617308  | 0.009793  |
| 12                                                                | -3.276546 | -1.654964 | -0.015017 |
| 6                                                                 | 3.753611  | 0.194100  | 0.005661  |
| 16                                                                |           |           |           |
| 133.597990 Kcal/mol 5.793364 eV -101.170778 H Child_5_14.log      |           |           |           |
| 6                                                                 | 5.358200  | -2.213615 | 0.003173  |
| 8                                                                 | -8.604025 | -0.534952 | -0.105465 |
| 6                                                                 | 3.883754  | -2.346776 | -0.016836 |
| 6                                                                 | -7.415022 | -0.329805 | -0.085920 |
| 6                                                                 | 4.461105  | -1.091241 | 0.010089  |
| 6                                                                 | -6.164445 | -0.126077 | -0.050051 |
| 8                                                                 | 5.252294  | 2.367120  | -0.201335 |
| 6                                                                 | -4.886178 | 0.116599  | 0.005671  |
| 6                                                                 | 4.681907  | 1.360371  | -0.076362 |
| 6                                                                 | -3.652259 | 0.342987  | 0.056970  |
| 6                                                                 | 3.876944  | 0.241571  | 0.016811  |
| 6                                                                 | -2.365720 | 0.636099  | 0.121164  |
| 12                                                                | 1.901425  | -1.682624 | -0.007941 |
| 6                                                                 | -1.131937 | 0.921132  | 0.184331  |
| 12                                                                | 0.766258  | 1.485961  | 0.094449  |
| 6                                                                 | 2.487261  | 0.439190  | 0.067011  |
| 16                                                                |           |           |           |
| 134.039534 Kcal/mol 5.812512 eV -101.170075 H Original3D_15_7.log |           |           |           |
| 6                                                                 | 0.983127  | -0.671902 | 1.097679  |
| 6                                                                 | -1.073984 | -0.060190 | -0.289794 |
| 6                                                                 | -1.214707 | 0.773592  | 0.750027  |
| 12                                                                | -3.177811 | 1.307903  | 0.904190  |
| 6                                                                 | -1.960499 | -1.034905 | -0.987226 |
| 6                                                                 | 0.236087  | 0.413660  | 0.353311  |
| 6                                                                 | -3.318816 | -0.542975 | -0.864065 |
| 8                                                                 | 0.586745  | -1.189036 | 2.153356  |
| 6                                                                 | 2.201345  | -1.129289 | 0.451819  |
| 6                                                                 | 3.317348  | -0.671443 | -0.209170 |
| 6                                                                 | 1.697788  | 2.471149  | -0.642233 |
| 8                                                                 | -1.598158 | -2.112405 | -1.462247 |
| 6                                                                 | 3.164588  | -2.111985 | -0.002004 |
| 6                                                                 | 1.068773  | 1.465299  | -0.209436 |
| 6                                                                 | -4.231497 | 0.245198  | -0.528929 |
| 12                                                                | 3.417310  | 1.319954  | -0.824918 |
| 16                                                                |           |           |           |
| 134.143858 Kcal/mol 5.817036 eV -101.169909 H Original2D_6_2.log  |           |           |           |
| 8                                                                 | -0.560480 | -1.693825 | -0.000000 |
| 12                                                                | 1.538569  | -1.385899 | 0.000000  |
| 12                                                                | -2.319023 | -2.609798 | -0.000000 |



|                                                              |           |           |           |
|--------------------------------------------------------------|-----------|-----------|-----------|
| 6                                                            | 3.891809  | -1.410034 | 0.000000  |
| 6                                                            | -3.987957 | -1.448942 | -0.000000 |
| 8                                                            | 4.524750  | -0.436095 | 0.000000  |
| 6                                                            | -3.263995 | -0.411645 | -0.000000 |
| 6                                                            | -2.066518 | 0.314761  | -0.000000 |
| 6                                                            | -0.848297 | -0.358488 | -0.000000 |
| 6                                                            | 1.361567  | 0.798818  | 0.000000  |
| 6                                                            | -1.327676 | 1.604953  | -0.000000 |
| 6                                                            | 3.564123  | 2.221782  | 0.000000  |
| 6                                                            | -1.831337 | 4.181465  | -0.000000 |
| 6                                                            | -0.000000 | 0.807887  | 0.000000  |
| 6                                                            | -1.632196 | 2.904498  | -0.000000 |
| 6                                                            | 2.415690  | 1.626231  | 0.000000  |
| 16                                                           |           |           |           |
| 134.356802 Kcal/mol 5.826270 eV -101.169569 H Child_9_29.log |           |           |           |
| 6                                                            | 5.330088  | -2.356581 | -0.008366 |
| 12                                                           | -6.107919 | -0.867906 | -0.242401 |
| 6                                                            | 4.293827  | -1.584532 | -0.007616 |
| 6                                                            | -0.680647 | -1.123044 | -0.010010 |
| 6                                                            | 3.405471  | 0.750852  | -0.012147 |
| 6                                                            | -1.906800 | -0.850924 | 0.036923  |
| 6                                                            | 2.205080  | 1.436591  | -0.001612 |
| 6                                                            | 0.643232  | -1.244525 | -0.033553 |
| 6                                                            | 3.222908  | -0.758875 | -0.017697 |
| 6                                                            | -3.083789 | -0.136409 | 0.154549  |
| 6                                                            | 1.060763  | 2.034017  | -0.092179 |
| 6                                                            | 1.882252  | -1.156567 | -0.027526 |
| 6                                                            | -0.192846 | 2.253272  | -0.151813 |
| 12                                                           | -2.146635 | 1.766595  | 0.076430  |
| 8                                                            | -4.278358 | -0.618774 | 0.344844  |
| 8                                                            | 4.525537  | 1.323283  | 0.032399  |
| 16                                                           |           |           |           |
| 134.370338 Kcal/mol 5.826857 eV -101.169548 H MutD_18_76.log |           |           |           |
| 6                                                            | 3.535204  | -2.590525 | 2.330246  |
| 12                                                           | 5.618178  | 1.572162  | -0.703859 |
| 6                                                            | 2.684347  | -0.890520 | 0.526012  |
| 6                                                            | 3.085283  | -1.761129 | 1.465340  |
| 6                                                            | -2.324392 | -0.721709 | -0.546225 |
| 6                                                            | -3.569827 | 2.603132  | 0.869044  |
| 6                                                            | -3.277443 | 0.216851  | -0.078178 |
| 8                                                            | -2.775810 | -1.892764 | -0.919752 |
| 6                                                            | 1.636205  | -0.288510 | -0.250364 |
| 6                                                            | -3.827473 | 3.756472  | 1.391915  |
| 6                                                            | -3.361972 | 1.418715  | 0.373189  |
| 6                                                            | -0.935632 | -0.463719 | -0.565872 |
| 12                                                           | -4.717247 | -1.530566 | -0.431090 |
| 8                                                            | 3.787102  | 0.976623  | -0.889517 |
| 6                                                            | 0.277144  | -0.325732 | -0.466211 |
| 6                                                            | 2.928305  | 0.185004  | -0.366639 |
| 16                                                           |           |           |           |
| 134.382721 Kcal/mol 5.827394 eV -101.169528 H Child_5_43.log |           |           |           |
| 12                                                           | -4.224367 | -1.431242 | 0.271121  |
| 8                                                            | 7.072705  | 0.005773  | 0.746448  |
| 8                                                            | -3.601930 | 0.391742  | 0.192040  |
| 6                                                            | 7.538259  | -0.058089 | -0.302283 |

|                                                              |           |           |           |
|--------------------------------------------------------------|-----------|-----------|-----------|
| 6                                                            | -2.061893 | -1.413095 | 0.046636  |
| 6                                                            | 0.536289  | 4.316553  | -0.163382 |
| 6                                                            | -2.288102 | 0.019135  | 0.060616  |
| 6                                                            | 1.029435  | 3.137447  | -0.237520 |
| 6                                                            | -0.980943 | -2.153783 | -0.055020 |
| 12                                                           | -1.331905 | 3.151559  | -0.001698 |
| 6                                                            | -0.019695 | -2.981470 | -0.139635 |
| 6                                                            | 1.045114  | 1.773775  | -0.257639 |
| 6                                                            | -1.282901 | 0.944445  | -0.036171 |
| 6                                                            | 0.964070  | -3.829342 | -0.230197 |
| 6                                                            | 0.076831  | 0.963028  | -0.172826 |
| 6                                                            | 1.928378  | -4.689258 | -0.302742 |
| 16                                                           |           |           |           |
| 134.477088 Kcal/mol 5.831486 eV -101.169378 H Child_6_18.log |           |           |           |
| 12                                                           | -4.025768 | 1.318469  | 0.245591  |
| 6                                                            | 6.462055  | 0.368789  | 1.061040  |
| 8                                                            | -2.173486 | 1.539071  | 0.080269  |
| 6                                                            | 5.352618  | -0.014325 | 0.512945  |
| 6                                                            | -5.340728 | -0.249181 | 0.312126  |
| 6                                                            | 4.177897  | -0.369730 | 0.075076  |
| 6                                                            | -0.961157 | 1.241806  | -0.114465 |
| 6                                                            | 3.152001  | -1.164951 | -0.219122 |
| 6                                                            | -4.323858 | -1.027450 | 0.300212  |
| 12                                                           | 0.013749  | -1.368270 | -0.345337 |
| 6                                                            | 0.259752  | 1.021528  | -0.394971 |
| 6                                                            | 2.031965  | -1.697182 | -0.398105 |
| 6                                                            | -3.128730 | -1.662032 | 0.180146  |
| 6                                                            | -1.922584 | -1.911423 | -0.007743 |
| 6                                                            | 1.526419  | 1.519762  | -0.518351 |
| 8                                                            | 2.727276  | 1.493921  | -0.522240 |
| 16                                                           |           |           |           |
| 134.655773 Kcal/mol 5.839234 eV -101.169093 H MutD_14_62.log |           |           |           |
| 12                                                           | -0.257081 | -0.806483 | -0.390512 |
| 8                                                            | -1.685571 | -0.091418 | -1.531483 |
| 6                                                            | -2.527300 | 0.143285  | -0.510678 |
| 6                                                            | -2.058258 | -0.305920 | 0.763536  |
| 6                                                            | 1.726550  | -1.469717 | -0.379885 |
| 6                                                            | -4.807705 | 1.412073  | -0.857572 |
| 6                                                            | 5.907488  | 3.371919  | 0.473171  |
| 6                                                            | 4.326573  | 1.353865  | 0.038350  |
| 6                                                            | 5.132860  | 2.365649  | 0.235972  |
| 6                                                            | -2.501818 | -0.335926 | 1.978320  |
| 12                                                           | 2.386016  | -3.462786 | -0.446613 |
| 6                                                            | 2.637088  | -0.565917 | -0.265810 |
| 6                                                            | -3.710741 | 0.782228  | -0.706305 |
| 6                                                            | 3.532155  | 0.386002  | -0.137439 |
| 6                                                            | -5.910916 | 2.092977  | -1.078070 |
| 8                                                            | -2.817312 | -0.427567 | 3.121978  |
| 16                                                           |           |           |           |
| 134.680511 Kcal/mol 5.840307 eV -101.169053 H Child_8_62.log |           |           |           |
| 6                                                            | -2.565544 | -2.392190 | 0.003700  |
| 8                                                            | 5.317751  | -0.438217 | 0.859501  |
| 6                                                            | -1.796839 | -3.364348 | -0.241643 |
| 6                                                            | 4.447152  | 0.099349  | 0.263039  |
| 12                                                           | -0.071053 | -2.226314 | -0.121832 |

|    |                                                               |           |           |
|----|---------------------------------------------------------------|-----------|-----------|
| 6  | 3.399421                                                      | 0.646091  | -0.268456 |
| 6  | 1.113576                                                      | -0.457656 | -0.144909 |
| 6  | 1.881728                                                      | 0.731886  | -0.242513 |
| 6  | -3.200415                                                     | -1.199044 | 0.149761  |
| 6  | 2.755541                                                      | 1.212651  | -1.391276 |
| 8  | -0.216956                                                     | -0.209151 | -0.004163 |
| 12 | -0.191364                                                     | 1.769178  | 0.172805  |
| 6  | -3.346268                                                     | 0.018631  | 0.252889  |
| 6  | -2.202601                                                     | 2.344666  | 0.234942  |
| 6  | -3.204117                                                     | 1.377168  | 0.202112  |
| 6  | -3.557859                                                     | 2.760224  | -0.060042 |
| 16 | 134.685849 Kcal/mol 5.840539 eV -101.169045 H Child_11_16.log |           |           |
| 8  | 5.627367                                                      | -1.563241 | -0.047307 |
| 6  | -1.977638                                                     | 3.349004  | 0.536020  |
| 6  | 4.440418                                                      | -1.531776 | -0.094597 |
| 8  | 1.436010                                                      | 4.753255  | -0.469840 |
| 6  | 3.170048                                                      | -1.499518 | -0.156769 |
| 6  | 0.489584                                                      | 4.098436  | -0.163795 |
| 6  | 1.906763                                                      | -1.319426 | -0.047028 |
| 6  | -0.534168                                                     | 3.375190  | 0.163766  |
| 6  | 0.615786                                                      | -1.233488 | 0.077466  |
| 6  | -1.298407                                                     | 2.154845  | 0.225245  |
| 6  | -1.245904                                                     | 0.802576  | 0.097968  |
| 6  | -2.698565                                                     | -1.538458 | 0.596965  |
| 12 | -4.054447                                                     | -2.061758 | -0.831692 |
| 12 | -0.964758                                                     | -2.970542 | 0.339595  |
| 6  | -0.416074                                                     | -0.335762 | 0.127797  |
| 6  | -1.831272                                                     | -0.510372 | 0.310689  |
| 16 | 134.714072 Kcal/mol 5.841762 eV -101.169000 H MutD_5_72.log   |           |           |
| 6  | 1.567184                                                      | 1.884481  | 0.022153  |
| 8  | 4.744421                                                      | 0.206487  | -0.074223 |
| 6  | 2.540534                                                      | 1.115700  | 0.033267  |
| 6  | -1.424804                                                     | -0.834676 | 0.072265  |
| 6  | -2.575371                                                     | -1.665893 | 0.012940  |
| 8  | 3.522083                                                      | -2.349192 | -0.034036 |
| 6  | 2.810691                                                      | -1.343811 | 0.012240  |
| 6  | -3.616122                                                     | -2.542871 | -0.112564 |
| 6  | 3.521009                                                      | 0.056050  | -0.004692 |
| 6  | -4.050075                                                     | 0.196592  | 0.004540  |
| 6  | -1.717318                                                     | 0.502040  | 0.034078  |
| 6  | -1.947345                                                     | 1.956961  | -0.015087 |
| 12 | 0.642083                                                      | -1.152092 | 0.089112  |
| 6  | -3.051919                                                     | 1.101741  | -0.007886 |
| 6  | -3.950121                                                     | -1.103297 | -0.030172 |
| 12 | -0.206256                                                     | 2.919053  | -0.027481 |
| 16 | 134.800176 Kcal/mol 5.845496 eV -101.168863 H Child_8_31.log  |           |           |
| 6  | 0.023354                                                      | -2.743763 | -2.086261 |
| 6  | -3.949596                                                     | -0.289103 | 0.784090  |
| 8  | 5.589371                                                      | -0.040090 | 0.290814  |
| 6  | -3.247778                                                     | 0.389599  | -0.000286 |
| 8  | -1.016274                                                     | -3.091928 | -1.741251 |
| 6  | 4.388944                                                      | -0.088294 | 0.390033  |

|                                                               |           |           |            |
|---------------------------------------------------------------|-----------|-----------|------------|
| 6                                                             | -2.302493 | 1.146901  | -0.701364  |
| 6                                                             | 3.127798  | -0.197191 | 0.560408   |
| 12                                                            | -2.346020 | -0.896597 | 1.930334   |
| 6                                                             | 1.809787  | -0.032131 | 0.413183   |
| 6                                                             | -1.463242 | 2.263178  | -0.282840  |
| 12                                                            | 0.824284  | 1.332376  | -0.911844  |
| 6                                                             | -0.335090 | -0.733409 | 1.764991   |
| 6                                                             | 0.764842  | -0.531351 | 1.210802   |
| 6                                                             | -1.407350 | 1.083543  | -1.698810  |
| 6                                                             | -0.463164 | 3.036486  | -0.457010  |
| 16                                                            |           |           |            |
| 134.844249 Kcal/mol 5.847407 eV -101.168792 H Child_10_48.log |           |           |            |
| 6                                                             | -8.007958 | 0.277736  | -0.870472  |
| 8                                                             | 5.044786  | -0.665504 | -1.058973  |
| 6                                                             | -6.757281 | 0.109914  | -0.541375  |
| 12                                                            | 4.368866  | 1.048943  | -0.453797  |
| 6                                                             | -5.500419 | -0.018904 | -0.210433  |
| 6                                                             | 2.806379  | 2.203377  | 0.099487   |
| 6                                                             | -4.266643 | -0.110187 | 0.097623   |
| 6                                                             | 1.615781  | 1.948146  | 0.356370   |
| 6                                                             | -3.001280 | -0.074730 | 0.365559   |
| 8                                                             | 4.036745  | -0.863198 | 0.214429   |
| 6                                                             | -1.718102 | -0.092348 | 0.569111   |
| 6                                                             | 0.364337  | 1.471167  | 0.551727   |
| 6                                                             | 1.750835  | -1.946343 | 0.074648   |
| 6                                                             | 2.930769  | -1.516902 | 0.017289   |
| 6                                                             | -0.709017 | 0.856695  | 0.617562   |
| 12                                                            | -0.176921 | -1.583619 | 0.453278   |
| 16                                                            |           |           |            |
| 135.056962 Kcal/mol 5.856632 eV -101.168453 H MutI_9_79.log   |           |           |            |
| 8                                                             | 0.000000  | 0.000000  | -0.847138  |
| 6                                                             | 0.000000  | 0.000000  | 0.403179   |
| 8                                                             | 0.000000  | 0.000000  | 10.748562  |
| 6                                                             | 0.000000  | 0.000000  | 1.652186   |
| 6                                                             | 0.000000  | 0.000000  | 2.954641   |
| 6                                                             | 0.000000  | 0.000000  | 9.586988   |
| 12                                                            | 0.000000  | 0.000000  | -2.694741  |
| 6                                                             | 0.000000  | 0.000000  | -8.479622  |
| 6                                                             | 0.000000  | 0.000000  | -11.086236 |
| 6                                                             | 0.000000  | 0.000000  | -5.898070  |
| 6                                                             | 0.000000  | 0.000000  | 5.523786   |
| 6                                                             | 0.000000  | 0.000000  | -7.229511  |
| 6                                                             | 0.000000  | 0.000000  | 4.243343   |
| 6                                                             | 0.000000  | 0.000000  | -9.802159  |
| 6                                                             | 0.000000  | 0.000000  | -4.645199  |
| 12                                                            | 0.000000  | 0.000000  | 7.482129   |
| 16                                                            |           |           |            |
| 135.610456 Kcal/mol 5.880633 eV -101.167571 H MutI_14_33.log  |           |           |            |
| 6                                                             | 1.479387  | -1.302663 | -0.406726  |
| 6                                                             | 0.394351  | -1.834719 | -0.632723  |
| 6                                                             | 0.166431  | 1.781880  | 0.456864   |
| 6                                                             | 1.261225  | 2.091418  | -0.099254  |
| 6                                                             | -0.908628 | -2.209425 | -0.716298  |
| 6                                                             | 3.558391  | -1.042099 | 0.773555   |
| 6                                                             | 2.518731  | 1.683075  | -0.655758  |

|                                                               |           |           |           |
|---------------------------------------------------------------|-----------|-----------|-----------|
| 12                                                            | -3.277859 | -0.809680 | -0.018269 |
| 12                                                            | -5.830553 | 0.837081  | 0.271920  |
| 6                                                             | -2.153169 | 0.703202  | 0.792551  |
| 6                                                             | -2.146313 | -2.371184 | -0.693327 |
| 6                                                             | 2.687252  | -0.658488 | -0.157168 |
| 6                                                             | -1.065175 | 1.314479  | 0.663043  |
| 8                                                             | 3.125622  | 0.493768  | -0.904661 |
| 8                                                             | 4.356588  | -1.415444 | 1.553369  |
| 6                                                             | 2.448059  | 3.018623  | -0.697004 |
| 16                                                            |           |           |           |
| 135.655403 Kcal/mol 5.882582 eV -101.167500 H Child_16_22.log |           |           |           |
| 8                                                             | 2.419926  | -2.052856 | -0.602437 |
| 8                                                             | -3.558125 | 1.573032  | -0.253463 |
| 12                                                            | 4.226299  | -2.198860 | 0.217717  |
| 6                                                             | -2.298140 | 1.419127  | -0.273011 |
| 6                                                             | 2.176851  | -0.784695 | -0.313653 |
| 12                                                            | -5.266487 | 0.753607  | -0.112531 |
| 6                                                             | 3.296045  | -0.005289 | 0.058939  |
| 6                                                             | -1.743654 | 0.007813  | 0.006370  |
| 6                                                             | 3.841529  | 1.147956  | 0.137518  |
| 6                                                             | -3.937705 | -1.162373 | 0.343134  |
| 6                                                             | 4.490354  | 2.279423  | 0.222831  |
| 6                                                             | -5.223927 | -1.296688 | 0.484574  |
| 6                                                             | -0.354665 | -0.163724 | -0.105310 |
| 6                                                             | 5.132269  | 3.386839  | 0.230592  |
| 6                                                             | 0.844763  | -0.355623 | -0.263537 |
| 6                                                             | -2.625746 | -0.942496 | 0.402380  |
| 16                                                            |           |           |           |
| 135.773236 Kcal/mol 5.887692 eV -101.167312 H Child_2_11.log  |           |           |           |
| 8                                                             | 6.311856  | 0.926606  | 0.125079  |
| 12                                                            | -3.651071 | 2.141274  | 0.180774  |
| 6                                                             | 5.141480  | 0.692351  | 0.086154  |
| 6                                                             | -2.501698 | 0.288313  | 0.156410  |
| 6                                                             | 3.893024  | 0.448529  | 0.047016  |
| 8                                                             | -1.978010 | 3.137711  | -0.326564 |
| 6                                                             | 2.634428  | 0.209713  | 0.012586  |
| 12                                                            | -2.767590 | -1.803947 | 0.255662  |
| 6                                                             | -1.258937 | 0.831490  | -0.025625 |
| 6                                                             | 1.383955  | -0.132500 | 0.010152  |
| 6                                                             | -0.993918 | 2.344453  | -0.408406 |
| 6                                                             | -0.096545 | -2.510897 | -0.042184 |
| 6                                                             | -0.152764 | -3.891147 | -0.576162 |
| 6                                                             | 0.377805  | -1.216426 | 0.078167  |
| 6                                                             | -0.064471 | 0.046730  | 0.044171  |
| 6                                                             | -1.303500 | -3.204353 | 0.013497  |
| 16                                                            |           |           |           |
| 136.166989 Kcal/mol 5.904767 eV -101.166685 H Child_6_29.log  |           |           |           |
| 8                                                             | 5.094560  | 0.595489  | -0.337594 |
| 8                                                             | -3.541824 | 3.061827  | -0.305212 |
| 6                                                             | 3.942485  | 0.392419  | -0.100090 |
| 6                                                             | -2.895142 | 2.051939  | -0.300115 |
| 6                                                             | 2.679858  | 0.120805  | 0.088801  |
| 6                                                             | -1.720548 | -3.083876 | -0.128818 |
| 12                                                            | 1.404281  | -1.528184 | -0.388979 |
| 6                                                             | -1.683968 | -1.547543 | -0.196921 |

|    |                                                                   |           |           |
|----|-------------------------------------------------------------------|-----------|-----------|
| 6  | 1.596157                                                          | 0.942800  | 0.622433  |
| 6  | -2.015348                                                         | 1.094573  | -0.275906 |
| 6  | 0.536517                                                          | 0.416849  | 1.266959  |
| 6  | -0.582693                                                         | -2.193289 | -0.638501 |
| 6  | -1.698670                                                         | -0.174508 | 0.361744  |
| 12 | -0.000534                                                         | 2.154916  | -0.261192 |
| 6  | -2.350121                                                         | -4.159835 | 0.184970  |
| 6  | -0.686336                                                         | 0.009780  | 1.272861  |
| 16 | 136.183697 Kcal/mol 5.905491 eV -101.166658 H Child_15_13.log     |           |           |
| 6  | 2.401769                                                          | 2.288618  | -0.596392 |
| 8  | -3.549264                                                         | -1.892166 | -1.399084 |
| 6  | 1.180796                                                          | 2.061278  | -0.673366 |
| 6  | -2.654694                                                         | -2.092182 | -0.709458 |
| 6  | 3.674811                                                          | 1.905060  | -0.375644 |
| 12 | -0.496946                                                         | -1.930895 | 0.077510  |
| 6  | -1.352811                                                         | 1.388565  | -0.021976 |
| 12 | -3.360561                                                         | 1.686659  | 0.599989  |
| 6  | -0.005178                                                         | 1.441470  | -0.401292 |
| 6  | 1.378284                                                          | -2.484698 | 0.664635  |
| 6  | 4.367714                                                          | 0.930456  | -0.033655 |
| 6  | 2.574311                                                          | -2.129847 | 0.665039  |
| 6  | -0.609712                                                         | 0.180801  | -0.208483 |
| 6  | 3.703843                                                          | -1.393828 | 0.520445  |
| 6  | 4.379999                                                          | -0.374701 | 0.316836  |
| 8  | -4.943823                                                         | 0.967777  | 1.022819  |
| 16 | 136.268304 Kcal/mol 5.909160 eV -101.166523 H Child_6_36.log      |           |           |
| 8  | 4.786789                                                          | 1.171820  | 1.233337  |
| 8  | -4.525828                                                         | 1.690468  | 0.770910  |
| 6  | 3.768597                                                          | 0.834805  | 0.721160  |
| 6  | -3.478946                                                         | 1.145402  | 0.618645  |
| 6  | 2.646626                                                          | 0.494991  | 0.146890  |
| 12 | -0.677332                                                         | 1.315606  | -0.859161 |
| 6  | 1.513952                                                          | 1.041379  | -0.660449 |
| 6  | -2.323339                                                         | 0.610872  | 0.356981  |
| 6  | 1.853307                                                          | -0.713585 | -0.168161 |
| 6  | -1.893086                                                         | -0.733198 | 0.526541  |
| 6  | 0.242121                                                          | -0.503889 | -2.273364 |
| 6  | 1.315422                                                          | -0.172566 | -1.434614 |
| 6  | -0.625326                                                         | -1.245600 | -1.579899 |
| 12 | 0.444209                                                          | -1.889863 | 0.990607  |
| 6  | -1.181316                                                         | -1.547973 | -0.437923 |
| 6  | -1.719714                                                         | -1.878509 | 1.248972  |
| 16 | 136.572293 Kcal/mol 5.922343 eV -101.166039 H Original3D_0_74.log |           |           |
| 6  | -1.754080                                                         | -0.538833 | 0.045947  |
| 8  | 3.185491                                                          | 1.178142  | 1.064079  |
| 6  | 2.898561                                                          | -2.132547 | -0.292463 |
| 6  | 2.344909                                                          | 1.701209  | 0.028346  |
| 12 | -0.192340                                                         | -1.976292 | 0.002516  |
| 6  | 0.955625                                                          | 1.649871  | 0.012993  |
| 6  | -1.530030                                                         | 0.819373  | -0.045907 |
| 6  | -0.239015                                                         | 1.388134  | -0.056774 |
| 6  | 1.724534                                                          | -2.576539 | -0.247622 |

|                                                              |           |           |           |
|--------------------------------------------------------------|-----------|-----------|-----------|
| 6                                                            | -3.854071 | 0.629606  | -0.026108 |
| 6                                                            | -2.845080 | 1.519171  | -0.115346 |
| 12                                                           | 3.791184  | -0.339648 | -0.051066 |
| 6                                                            | -4.235017 | 2.031584  | -0.247557 |
| 6                                                            | -3.242103 | -0.759719 | 0.110308  |
| 6                                                            | 3.372818  | 1.798196  | -0.824906 |
| 8                                                            | -3.781544 | -1.851362 | 0.253065  |
| 16                                                           |           |           |           |
| 136.678471 Kcal/mol 5.926947 eV -101.165869 H Child_7_38.log |           |           |           |
| 8                                                            | 14.433920 | -0.274708 | -0.309828 |
| 6                                                            | -6.206293 | 3.968177  | -0.011329 |
| 6                                                            | 15.160055 | 0.614030  | -0.354608 |
| 6                                                            | -5.607166 | 2.832329  | -0.099839 |
| 8                                                            | 3.599265  | 1.757336  | 0.599732  |
| 6                                                            | -4.991191 | 1.685508  | -0.187771 |
| 12                                                           | -1.250583 | -3.008002 | 0.485453  |
| 12                                                           | -5.413228 | -1.774355 | -0.438314 |
| 6                                                            | -0.665576 | -0.845870 | 0.007337  |
| 6                                                            | -4.404999 | 0.557392  | -0.230400 |
| 6                                                            | 2.589989  | 1.157783  | 0.416754  |
| 6                                                            | -3.355488 | -0.296627 | -0.126656 |
| 6                                                            | 0.396785  | -0.107946 | 0.092620  |
| 6                                                            | 1.508794  | 0.511270  | 0.215262  |
| 6                                                            | -2.025751 | -0.779800 | -0.132076 |
| 6                                                            | -3.115785 | -1.708371 | -0.070110 |
| 16                                                           |           |           |           |
| 136.838664 Kcal/mol 5.933894 eV -101.165614 H MutD_18_62.log |           |           |           |
| 6                                                            | -0.726602 | -3.378491 | -0.144710 |
| 6                                                            | 1.381601  | 1.369567  | -0.431048 |
| 6                                                            | 5.261544  | 0.877166  | -0.029909 |
| 6                                                            | -1.564541 | -2.385302 | -0.066167 |
| 6                                                            | 0.313839  | -4.127870 | -0.312483 |
| 6                                                            | -1.074394 | 0.622698  | -0.268124 |
| 6                                                            | -2.410749 | -1.416753 | 0.020208  |
| 12                                                           | 3.428549  | 1.431037  | -0.325691 |
| 6                                                            | -3.533434 | 0.796797  | 0.103560  |
| 6                                                            | 0.157478  | 1.032547  | -0.365723 |
| 6                                                            | 6.270310  | 0.145643  | 0.298514  |
| 8                                                            | 7.214713  | -0.554742 | 0.603582  |
| 12                                                           | -4.429088 | -1.022203 | 0.341200  |
| 6                                                            | -3.824626 | 2.064839  | 0.151966  |
| 6                                                            | -2.263827 | 0.064952  | -0.072012 |
| 8                                                            | -4.203852 | 3.192148  | 0.210100  |
| 16                                                           |           |           |           |
| 136.964999 Kcal/mol 5.939372 eV -101.165413 H MutD_16_60.log |           |           |           |
| 6                                                            | 3.627227  | -1.685389 | -0.341114 |
| 6                                                            | 4.170669  | -0.551045 | -0.307772 |
| 6                                                            | 3.824280  | 0.793624  | -0.197803 |
| 12                                                           | -0.818600 | 0.728923  | 0.517908  |
| 6                                                            | 2.572040  | -2.473767 | -0.111344 |
| 12                                                           | 2.414674  | 2.348495  | 0.201285  |
| 6                                                            | -4.388732 | -0.035684 | -0.036900 |
| 6                                                            | -5.452481 | 0.561964  | -0.410063 |
| 6                                                            | 1.356924  | -2.721059 | 0.052149  |
| 8                                                            | 4.144772  | 1.866808  | -0.854593 |

|                                                              |           |           |           |
|--------------------------------------------------------------|-----------|-----------|-----------|
| 8                                                            | -6.448863 | 1.135776  | -0.742900 |
| 6                                                            | -2.064074 | -1.083819 | 0.275211  |
| 6                                                            | -1.070409 | -2.003997 | 0.274112  |
| 6                                                            | 0.043572  | -2.559256 | 0.221791  |
| 6                                                            | 0.535942  | 2.259200  | 1.135674  |
| 6                                                            | -3.274983 | -0.659054 | 0.137664  |
| 16                                                           |           |           |           |
| 136.980591 Kcal/mol 5.940048 eV -101.165388 H Child_6_23.log |           |           |           |
| 8                                                            | 3.618866  | -1.641727 | -0.826533 |
| 6                                                            | -1.855555 | 3.066989  | -0.647351 |
| 8                                                            | 4.431001  | 0.891614  | -0.024110 |
| 6                                                            | 2.767326  | -0.903043 | -0.303386 |
| 6                                                            | -1.769676 | 1.875486  | -0.074792 |
| 6                                                            | 3.239827  | 0.582536  | -0.027607 |
| 6                                                            | -2.794885 | 0.808612  | -0.025807 |
| 12                                                           | 0.790605  | -1.554968 | 0.288952  |
| 12                                                           | -3.977594 | -0.714397 | -0.704753 |
| 6                                                            | 2.099143  | 1.422575  | 0.236616  |
| 6                                                            | -2.128632 | -0.256657 | 0.577953  |
| 6                                                            | 0.893160  | 1.655325  | 0.312051  |
| 6                                                            | -0.466209 | 1.285564  | 0.431119  |
| 6                                                            | -1.230196 | -2.303804 | 0.318763  |
| 6                                                            | -0.719099 | 0.004540  | 0.857025  |
| 6                                                            | -2.394382 | -1.699241 | 0.311207  |
| 16                                                           |           |           |           |
| 137.227104 Kcal/mol 5.950738 eV -101.164995 H MutD_10_70.log |           |           |           |
| 6                                                            | -4.491688 | 1.100083  | -0.334946 |
| 12                                                           | 3.557736  | 1.365878  | 0.152288  |
| 6                                                            | 2.794300  | -3.143121 | 0.334731  |
| 6                                                            | 3.187475  | -1.879472 | 0.257068  |
| 6                                                            | 3.471431  | -0.668182 | 0.242866  |
| 8                                                            | -5.767030 | 2.848593  | 0.917280  |
| 6                                                            | -3.292731 | -1.155741 | -0.524182 |
| 6                                                            | 3.230501  | 3.312904  | -0.023528 |
| 6                                                            | -3.905833 | -0.050279 | -0.467821 |
| 12                                                           | -2.014832 | -2.812674 | -0.388994 |
| 6                                                            | 2.793687  | 4.507480  | -0.237891 |
| 6                                                            | 2.240238  | -4.263230 | 0.328018  |
| 6                                                            | -5.169932 | 1.963428  | 0.381720  |
| 6                                                            | 0.847021  | -4.293718 | 0.073605  |
| 6                                                            | -0.275664 | -3.839094 | -0.195370 |
| 8                                                            | 2.381070  | 5.628307  | -0.437924 |
| 16                                                           |           |           |           |
| 137.239857 Kcal/mol 5.951291 eV -101.164975 H Child_4_47.log |           |           |           |
| 6                                                            | 7.045585  | -0.203450 | -0.566689 |
| 8                                                            | -5.154618 | 1.344877  | -0.671790 |
| 6                                                            | 5.770673  | -0.096348 | -0.385821 |
| 6                                                            | -4.113659 | 0.902596  | -0.402580 |
| 6                                                            | 4.483606  | 0.014103  | -0.203038 |
| 6                                                            | -3.356184 | -2.479968 | -0.236330 |
| 6                                                            | 3.215613  | 0.126004  | -0.025767 |
| 6                                                            | -2.949757 | 0.304584  | -0.071190 |
| 6                                                            | 1.980488  | 0.901252  | 0.136797  |
| 6                                                            | -2.883822 | -1.134735 | -0.094353 |
| 12                                                           | 0.251342  | 1.979295  | 0.343830  |



|                                                               |           |           |           |
|---------------------------------------------------------------|-----------|-----------|-----------|
| 6                                                             | -1.948394 | -2.141571 | 0.023825  |
| 6                                                             | 1.856658  | -0.457473 | 0.175217  |
| 6                                                             | -1.775161 | 1.078570  | 0.243503  |
| 8                                                             | -0.759577 | 0.318877  | 0.640145  |
| 12                                                            | 0.028632  | -1.495245 | 0.380480  |
| 16                                                            |           |           |           |
| 137.412218 Kcal/mol 5.958765 eV -101.164700 H Child_11_39.log |           |           |           |
| 6                                                             | 4.530307  | 1.245358  | -1.770788 |
| 8                                                             | -4.981192 | 0.230673  | -0.392792 |
| 8                                                             | 3.664921  | 1.429294  | -1.013856 |
| 6                                                             | -2.953138 | 1.295013  | 0.326288  |
| 6                                                             | 0.661556  | -1.585617 | -1.679042 |
| 6                                                             | -3.757471 | 0.242040  | -0.211735 |
| 6                                                             | -1.801495 | -1.496245 | -0.639330 |
| 6                                                             | -1.907993 | 1.856398  | 0.652493  |
| 6                                                             | 0.522545  | -2.047918 | 0.325554  |
| 6                                                             | 0.631219  | 2.171832  | 0.951196  |
| 6                                                             | -0.458184 | -1.846413 | -0.651013 |
| 6                                                             | -0.612593 | 2.180913  | 0.888657  |
| 6                                                             | 1.170486  | -0.940186 | -0.514760 |
| 6                                                             | -2.839384 | -0.835435 | -0.539390 |
| 12                                                            | 2.195739  | -1.979833 | 1.826812  |
| 12                                                            | 2.088848  | 0.753319  | 0.541887  |
| 16                                                            |           |           |           |
| 137.469849 Kcal/mol 5.961264 eV -101.164608 H Child_1_25.log  |           |           |           |
| 12                                                            | 2.416662  | 1.696493  | 0.000000  |
| 6                                                             | -2.179175 | -2.979274 | -0.000000 |
| 6                                                             | 2.793915  | -0.322801 | 0.000000  |
| 6                                                             | -2.431944 | -1.756991 | -0.000000 |
| 6                                                             | 0.395487  | 2.244566  | 0.000000  |
| 6                                                             | -2.435724 | 4.971209  | 0.000000  |
| 6                                                             | -0.919918 | 2.842748  | 0.000000  |
| 12                                                            | -0.097734 | -3.031998 | -0.000000 |
| 6                                                             | 2.328368  | -1.678276 | -0.000000 |
| 8                                                             | -2.320775 | -0.413804 | -0.000000 |
| 6                                                             | 1.381962  | -0.665572 | -0.000000 |
| 6                                                             | 0.000000  | -0.895575 | -0.000000 |
| 8                                                             | 2.202084  | -2.950758 | -0.000000 |
| 6                                                             | -0.987417 | 0.034708  | -0.000000 |
| 6                                                             | -0.728435 | 1.435949  | 0.000000  |
| 6                                                             | -1.696719 | 3.926399  | 0.000000  |
| 16                                                            |           |           |           |
| 137.515105 Kcal/mol 5.963227 eV -101.164536 H MutI_18_73.log  |           |           |           |
| 6                                                             | -4.007548 | -1.793814 | -0.140650 |
| 12                                                            | 1.336246  | 1.413254  | 0.088433  |
| 6                                                             | -0.720302 | 1.885057  | 0.115662  |
| 6                                                             | -1.373726 | -2.026918 | -0.137740 |
| 6                                                             | 1.194046  | -1.777998 | -0.014076 |
| 6                                                             | -2.707143 | -1.912425 | -0.159924 |
| 6                                                             | 4.984382  | 0.948368  | -0.034406 |
| 6                                                             | 2.411730  | -1.661000 | 0.080847  |
| 6                                                             | -3.343532 | 1.870954  | 0.410261  |
| 12                                                            | -4.436814 | 0.175438  | 0.198864  |
| 6                                                             | -0.150128 | -1.928261 | -0.083123 |
| 8                                                             | 3.683602  | -1.453505 | 0.288460  |

|                                                                   |            |           |           |
|-------------------------------------------------------------------|------------|-----------|-----------|
| 8                                                                 | -0.288013  | 1.574694  | -1.075547 |
| 6                                                                 | 3.452786   | 1.109374  | 0.062757  |
| 6                                                                 | -2.104929  | 2.050560  | 0.290312  |
| 6                                                                 | 4.038050   | -0.102866 | 0.084937  |
| 16                                                                |            |           |           |
| 137.571382 Kcal/mol 5.965667 eV -101.164446 H Original3D_16_6.log |            |           |           |
| 8                                                                 | -4.473601  | 0.052804  | -0.335092 |
| 6                                                                 | 2.047411   | 0.895236  | 0.710360  |
| 6                                                                 | 4.572098   | 1.167075  | 0.538814  |
| 6                                                                 | 3.313342   | 1.333417  | 0.131946  |
| 6                                                                 | 3.537914   | -2.672799 | -0.837824 |
| 8                                                                 | 3.099450   | -1.699864 | -1.258553 |
| 6                                                                 | -0.212526  | 1.541589  | -0.306422 |
| 6                                                                 | -1.612492  | -2.082319 | 0.558212  |
| 12                                                                | -3.506727  | 1.501083  | 0.012932  |
| 6                                                                 | 1.193768   | 1.613323  | -0.185725 |
| 6                                                                 | -1.416545  | 1.274271  | -0.303592 |
| 6                                                                 | 2.343851   | 1.753059  | -1.043841 |
| 6                                                                 | 0.592545   | -1.001062 | 1.287787  |
| 12                                                                | -3.278434  | -1.312777 | -0.408942 |
| 6                                                                 | -0.565800  | -1.693985 | 1.047362  |
| 6                                                                 | 1.608957   | -0.308336 | 1.319801  |
| 16                                                                |            |           |           |
| 137.582509 Kcal/mol 5.966150 eV -101.164429 H Child_11_59.log     |            |           |           |
| 8                                                                 | -10.278460 | -0.932325 | -0.325519 |
| 8                                                                 | 2.746806   | -4.863639 | -0.263829 |
| 6                                                                 | -9.166039  | -1.201270 | -0.405631 |
| 6                                                                 | 2.438763   | -3.667779 | -0.166139 |
| 12                                                                | -1.190107  | 1.437613  | 0.897605  |
| 6                                                                 | 2.784107   | -2.295296 | -0.041525 |
| 6                                                                 | 0.417529   | 3.489071  | 0.283211  |
| 6                                                                 | 3.563020   | 0.127147  | -0.066250 |
| 6                                                                 | 3.463657   | -1.103198 | 0.007243  |
| 6                                                                 | 1.585228   | 3.355446  | -0.575494 |
| 6                                                                 | 3.273665   | 1.452114  | -0.173920 |
| 12                                                                | -0.159606  | -1.267242 | 0.475457  |
| 6                                                                 | 2.648390   | 2.480952  | -0.322843 |
| 6                                                                 | 0.893948   | 3.910339  | -1.586964 |
| 6                                                                 | 1.429655   | -2.651069 | 0.042785  |
| 6                                                                 | -0.590290  | 3.490751  | 1.045202  |
| 16                                                                |            |           |           |
| 137.720977 Kcal/mol 5.972154 eV -101.164208 H Child_16_27.log     |            |           |           |
| 6                                                                 | 2.188405   | -2.742101 | -0.026039 |
| 6                                                                 | -4.317037  | -0.531412 | 0.026325  |
| 12                                                                | 3.523041   | 0.853477  | -0.165537 |
| 6                                                                 | -3.648231  | -1.584287 | 0.044026  |
| 8                                                                 | 3.962308   | -0.967312 | -0.086042 |
| 6                                                                 | -2.702899  | -2.556478 | 0.052541  |
| 6                                                                 | 3.112677   | -1.934096 | -0.058328 |
| 12                                                                | -3.649564  | 1.365303  | -0.046768 |
| 6                                                                 | 2.326593   | 2.401247  | 0.614954  |
| 6                                                                 | -1.605602  | -3.121182 | 0.051023  |
| 8                                                                 | 1.293618   | 2.958350  | 0.157741  |
| 6                                                                 | -0.288857  | -3.399849 | 0.038554  |
| 6                                                                 | 0.305422   | 3.752157  | -0.193438 |

|                                                              |           |           |           |
|--------------------------------------------------------------|-----------|-----------|-----------|
| 6                                                            | -2.104437 | 2.690167  | -0.122613 |
| 6                                                            | -0.956128 | 3.175460  | -0.114909 |
| 6                                                            | 0.935238  | -3.241904 | 0.016916  |
| 16                                                           |           |           |           |
| 137.851748 Kcal/mol 5.977825 eV -101.164000 H Child_6_58.log |           |           |           |
| 6                                                            | -5.254013 | -0.199000 | -0.258221 |
| 6                                                            | 1.497453  | -2.852018 | 0.786284  |
| 6                                                            | -4.013455 | 0.084170  | -0.175530 |
| 6                                                            | 2.138911  | -1.961476 | -0.047345 |
| 6                                                            | -2.695115 | 0.338240  | -0.059385 |
| 6                                                            | 0.406007  | -3.321242 | 1.224598  |
| 8                                                            | -2.332223 | 1.687603  | 0.193103  |
| 6                                                            | 2.701486  | -0.806245 | -0.559329 |
| 8                                                            | -1.708087 | -0.479811 | -0.150496 |
| 6                                                            | 3.410697  | 0.365284  | -0.355397 |
| 6                                                            | -1.071139 | 2.081941  | 0.268881  |
| 6                                                            | 1.507206  | -1.276059 | -1.143259 |
| 12                                                           | -0.523584 | -1.877693 | -0.278900 |
| 6                                                            | 3.640246  | 1.550967  | -0.060838 |
| 6                                                            | 0.070806  | 2.540126  | 0.342012  |
| 12                                                           | 2.047580  | 2.800153  | 0.269259  |
| 16                                                           |           |           |           |
| 137.896577 Kcal/mol 5.979769 eV -101.163928 H Child_2_45.log |           |           |           |
| 6                                                            | 3.082121  | -1.180694 | -0.212702 |
| 12                                                           | -5.112875 | 1.885388  | 0.117276  |
| 6                                                            | 3.537902  | 0.120770  | -0.225045 |
| 6                                                            | -4.117971 | 0.055524  | 0.536531  |
| 6                                                            | 2.999073  | 1.334421  | -0.374462 |
| 6                                                            | -2.877382 | -0.268674 | 0.097974  |
| 6                                                            | 2.090887  | -1.909888 | -0.149251 |
| 6                                                            | -1.854017 | 0.644999  | -0.255250 |
| 6                                                            | 4.304405  | 1.242134  | 0.357590  |
| 6                                                            | -0.788683 | 1.245902  | -0.426258 |
| 6                                                            | 1.713708  | 1.792612  | -0.485937 |
| 8                                                            | 1.010010  | -2.578510 | -0.050494 |
| 6                                                            | 0.485484  | 1.679690  | -0.532972 |
| 12                                                           | -0.816994 | -2.377765 | 0.073553  |
| 6                                                            | 5.201496  | 1.784702  | 1.153882  |
| 8                                                            | -2.447972 | -1.589049 | 0.151176  |
| 16                                                           |           |           |           |
| 138.028217 Kcal/mol 5.985478 eV -101.163718 H Child_16_9.log |           |           |           |
| 12                                                           | 4.527810  | 0.132228  | -1.052271 |
| 6                                                            | -4.940437 | -0.903193 | -0.265573 |
| 6                                                            | 6.219305  | -0.051788 | 0.304135  |
| 6                                                            | -4.846280 | 0.350033  | -0.201115 |
| 8                                                            | 7.264283  | -0.207239 | 0.780079  |
| 6                                                            | -4.222722 | 1.553477  | -0.057689 |
| 6                                                            | 2.699610  | 0.225025  | -0.275069 |
| 6                                                            | -3.154917 | 2.158760  | 0.121221  |
| 6                                                            | 1.474303  | 0.385260  | -0.074961 |
| 12                                                           | -3.056695 | -1.729218 | -0.064013 |
| 6                                                            | -0.635842 | -0.783083 | 0.416147  |
| 6                                                            | -1.814830 | 2.108608  | 0.285132  |
| 6                                                            | -1.254465 | -1.488941 | 1.375927  |
| 6                                                            | -0.701937 | 1.571192  | 0.222497  |

|                                                               |            |           |           |
|---------------------------------------------------------------|------------|-----------|-----------|
| 6                                                             | 0.134206   | 0.444474  | 0.210369  |
| 8                                                             | -1.187950  | -1.574644 | -0.651418 |
| 16                                                            |            |           |           |
| 138.149011 Kcal/mol 5.990716 eV -101.163526 H MutD_5_76.log   |            |           |           |
| 12                                                            | 0.087457   | -3.180133 | -0.673782 |
| 6                                                             | 2.716337   | -1.330336 | -0.068503 |
| 6                                                             | -2.820716  | 1.186174  | -0.331525 |
| 6                                                             | -3.754304  | 0.350679  | -0.437592 |
| 6                                                             | 1.020477   | 1.562596  | 0.368337  |
| 8                                                             | 3.877048   | -1.032246 | -0.084696 |
| 6                                                             | -0.946994  | -1.883143 | 0.545493  |
| 6                                                             | 0.224059   | -1.163802 | 0.413230  |
| 6                                                             | 0.237365   | 0.291702  | 0.499022  |
| 6                                                             | -1.655971  | 2.016703  | -0.200993 |
| 12                                                            | -2.862918  | -1.216860 | 0.529843  |
| 6                                                             | 2.076403   | 2.258632  | 0.091318  |
| 6                                                             | -0.438213  | 1.411799  | 0.251376  |
| 6                                                             | 1.498002   | -1.773986 | -0.070068 |
| 6                                                             | -1.828518  | 3.302867  | -0.580083 |
| 8                                                             | 3.040198   | 2.955322  | -0.059404 |
| 16                                                            |            |           |           |
| 138.245957 Kcal/mol 5.994920 eV -101.163371 H MutI_14_49.log  |            |           |           |
| 6                                                             | 0.256343   | -2.717870 | 0.291448  |
| 6                                                             | 5.583145   | -2.244018 | -0.179349 |
| 6                                                             | -4.973173  | 0.299459  | -0.144937 |
| 6                                                             | -6.007407  | -2.035902 | 0.083611  |
| 12                                                            | 3.247994   | 1.212944  | 0.094829  |
| 6                                                             | -3.191525  | 2.118649  | -0.334019 |
| 6                                                             | -4.137371  | 1.305648  | -0.249570 |
| 6                                                             | -5.557978  | -0.805480 | -0.015023 |
| 6                                                             | -1.997008  | 2.652986  | -0.210483 |
| 6                                                             | -0.783101  | 2.870027  | -0.028263 |
| 8                                                             | 5.135216   | -3.225432 | -0.570134 |
| 6                                                             | -6.349861  | -3.235868 | 0.358255  |
| 6                                                             | 1.774266   | 2.575292  | 0.195643  |
| 6                                                             | 0.539106   | 2.784053  | 0.109796  |
| 12                                                            | 6.028620   | 0.356769  | 0.273743  |
| 8                                                             | -0.416716  | -1.804368 | 0.109445  |
| 16                                                            |            |           |           |
| 138.368319 Kcal/mol 6.000226 eV -101.163176 H Child_11_58.log |            |           |           |
| 6                                                             | 1.522682   | -1.022500 | -1.746486 |
| 8                                                             | -12.110700 | -0.537392 | -0.673815 |
| 6                                                             | 1.875249   | -1.844882 | -0.735889 |
| 6                                                             | -11.013761 | -0.344090 | -0.392612 |
| 12                                                            | 4.000690   | -0.079748 | -0.712810 |
| 12                                                            | 0.047491   | 2.418090  | 1.153430  |
| 6                                                             | 3.194046   | -1.979341 | -0.083242 |
| 8                                                             | -0.305901  | 0.794316  | 2.035577  |
| 6                                                             | 1.933289   | 0.195543  | -1.894063 |
| 6                                                             | 1.272539   | 3.240794  | -0.193576 |
| 6                                                             | 1.525591   | -2.228371 | 0.613831  |
| 6                                                             | 1.901692   | 2.390888  | -0.872931 |
| 6                                                             | 0.690388   | -1.419543 | 1.393671  |
| 6                                                             | 2.560896   | 1.308154  | -1.471503 |
| 6                                                             | 2.827728   | -2.954496 | 0.943722  |

|            |           |           |                                 |
|------------|-----------|-----------|---------------------------------|
| 6          | 0.168765  | -0.361404 | 1.742157                        |
| 16         |           |           |                                 |
| 138.408177 | Kcal/mol  | 6.001954  | eV -101.163113 H Child_4_51.log |
| 12         | 3.879989  | 1.019636  | -0.294002                       |
| 12         | -1.646763 | 2.656586  | -0.101128                       |
| 6          | 0.151993  | 0.408385  | 0.382148                        |
| 6          | 3.641428  | -2.201046 | -1.045567                       |
| 6          | 0.463323  | -0.910341 | 0.710553                        |
| 8          | -5.435956 | -1.508608 | -0.857695                       |
| 6          | 1.651046  | -1.596153 | 0.742514                        |
| 6          | -4.538562 | -0.805691 | -0.468257                       |
| 8          | -0.892457 | -1.275756 | 1.004260                        |
| 6          | -3.629096 | -0.007896 | -0.045483                       |
| 6          | 2.776994  | -1.621432 | 0.165321                        |
| 6          | 2.118343  | 2.035494  | -0.169871                       |
| 6          | 1.031586  | 1.442074  | 0.021367                        |
| 6          | -2.452691 | 0.539684  | 0.199242                        |
| 6          | -1.244632 | 0.108637  | 0.612532                        |
| 6          | 4.001700  | -1.031673 | -0.509660                       |
| 16         |           |           |                                 |
| 138.506853 | Kcal/mol  | 6.006233  | eV -101.162956 H Child_4_29.log |
| 8          | 4.130748  | -1.652625 | 0.015103                        |
| 6          | -3.898475 | 1.166177  | 1.348891                        |
| 6          | 2.889683  | -2.145182 | 0.205826                        |
| 6          | -4.818863 | -1.384975 | -1.590286                       |
| 6          | 4.139975  | -0.315693 | -0.179772                       |
| 8          | -3.876778 | -1.060784 | -1.003093                       |
| 6          | 3.993969  | 0.896738  | -0.341992                       |
| 6          | -2.821078 | 1.612236  | 0.780592                        |
| 6          | 1.687862  | -2.274098 | 0.343687                        |
| 12         | -2.330134 | -0.552495 | 0.368632                        |
| 6          | 0.329786  | -2.234489 | 0.458809                        |
| 6          | -1.619984 | 1.563218  | 0.166763                        |
| 12         | 2.609833  | 2.343902  | -0.409552                       |
| 6          | -0.881179 | -1.971680 | 0.518040                        |
| 6          | -0.527592 | 2.329490  | -0.078700                       |
| 6          | 0.627870  | 2.793325  | -0.232697                       |
| 16         |           |           |                                 |
| 138.627101 | Kcal/mol  | 6.011448  | eV -101.162764 H Child_5_63.log |
| 6          | 4.773192  | 0.910909  | -0.299667                       |
| 8          | -2.548220 | 2.795867  | -1.995420                       |
| 8          | 3.711105  | 1.240228  | 0.004195                        |
| 6          | -1.707232 | 0.743728  | -0.886967                       |
| 6          | -0.225203 | 1.297717  | 2.311031                        |
| 6          | -1.930706 | -0.364757 | -0.219682                       |
| 6          | 0.426340  | 2.154765  | 1.656090                        |
| 6          | -1.823929 | -1.366307 | 0.633950                        |
| 6          | -1.018425 | 0.188463  | 2.476112                        |
| 6          | -2.250402 | 1.782992  | -1.457897                       |
| 6          | -1.536693 | -0.792360 | 1.923221                        |
| 12         | -0.752924 | -3.100210 | 0.000389                        |
| 12         | 0.766768  | 1.112256  | -0.147385                       |
| 6          | 1.408615  | -0.687047 | -0.983910                       |
| 6          | 1.245892  | -1.973078 | -1.038461                       |
| 6          | 1.060349  | -3.300577 | -1.164862                       |

16  
139.055206 Kcal/mol 6.030012 eV -101.162082 H MutD\_17\_58.log  
12 -2.985189 -1.639460 -0.087534  
8 -4.850511 -1.617060 0.469293  
8 7.030559 -1.203489 0.394745  
6 -4.432649 0.556597 -0.061069  
12 0.953156 -0.804166 -0.423154  
6 0.237689 2.025931 0.070611  
6 3.745123 0.504196 -0.043630  
6 -2.301103 2.004257 -0.027458  
6 2.464931 0.733224 -0.105622  
6 6.007834 -0.556523 0.206280  
6 -3.489735 1.381680 -0.061649  
6 -1.077818 2.217265 0.055171  
6 1.404096 1.571992 0.026965  
6 -5.377404 -0.363972 0.426186  
6 -0.979529 -1.504742 -0.607521  
6 4.955899 0.078081 -0.008938  
16  
139.233982 Kcal/mol 6.037765 eV -101.161797 H Child\_17\_27.log  
6 5.637167 0.538760 -0.051971  
8 -7.205863 -0.424145 -0.603484  
6 4.374051 0.393689 -0.283720  
6 -7.871953 0.496123 -0.793789  
6 3.179608 -0.492302 -0.463843  
6 -1.214629 -2.218534 0.956239  
6 2.007077 1.824781 -0.493832  
6 -1.188929 -0.990922 1.075168  
6 0.990128 2.464536 -0.336900  
6 -1.027644 0.352395 1.041104  
6 2.983917 0.833373 -0.461421  
12 -0.138517 -3.696577 0.035517  
12 2.130837 -2.329941 -0.430202  
6 -0.766775 1.538381 0.846813  
6 -0.279049 2.755623 0.273532  
8 -0.899843 3.841996 0.214976  
16  
139.394492 Kcal/mol 6.044725 eV -101.161541 H MutI\_18\_55.log  
6 0.883612 1.159044 0.035149  
6 4.769339 1.305827 -0.329020  
8 -2.377388 2.839640 0.875047  
12 1.026923 -4.761876 0.727199  
8 -3.252388 -1.555531 -0.834716  
6 3.463421 1.256829 -0.180160  
6 -1.112401 2.662152 1.088376  
6 -0.394171 -1.965413 -0.251132  
6 -2.494007 -0.607472 -0.596604  
6 6.051310 1.330413 -0.455273  
12 -3.152750 1.476757 -0.316493  
6 2.214556 1.192460 -0.061569  
6 0.081495 -3.049666 0.110751  
6 -0.335451 1.840509 0.271215  
6 -0.335933 0.448497 -0.143327  
6 -1.033748 -0.715086 -0.363593  
16

139.565099 Kcal/mol 6.052123 eV -101.161269 H MutD\_18\_72.log

|    |           |           |           |
|----|-----------|-----------|-----------|
| 6  | 0.669006  | -0.585815 | -0.253655 |
| 6  | 3.544401  | 4.349138  | 0.090133  |
| 6  | -1.222983 | -0.787491 | 1.406108  |
| 6  | -2.748834 | 0.128985  | -1.420842 |
| 6  | -0.630068 | -0.509619 | -0.106826 |
| 6  | 3.329376  | 3.078733  | 0.151574  |
| 8  | -2.471957 | -0.498692 | 1.472680  |
| 6  | 2.974598  | 1.806103  | 0.119299  |
| 6  | -5.245393 | 0.574424  | -0.839841 |
| 6  | 2.001688  | -0.627535 | -0.015780 |
| 6  | -1.607840 | -0.156115 | -1.055722 |
| 8  | 2.632983  | -1.813977 | 0.076766  |
| 12 | 4.236016  | -2.639391 | -0.349669 |
| 6  | 2.666881  | 0.592331  | 0.092141  |
| 6  | -4.094159 | 0.387027  | -1.331316 |
| 12 | -4.161703 | 0.056088  | 0.899068  |

16

139.861677 Kcal/mol 6.064984 eV -101.160797 H Child\_4\_10.log

|    |           |           |           |
|----|-----------|-----------|-----------|
| 6  | -4.643978 | 2.611389  | 0.315939  |
| 6  | -1.442156 | -4.657009 | 0.273357  |
| 6  | -3.394526 | 2.418297  | 0.130446  |
| 8  | -1.004512 | -3.603452 | 0.056805  |
| 6  | -2.114207 | 2.184153  | -0.045677 |
| 6  | 4.326627  | -0.450149 | 0.187179  |
| 8  | -3.256627 | -0.599052 | -0.058588 |
| 12 | -0.071036 | -1.654233 | -0.284885 |
| 6  | -0.871136 | 2.012266  | -0.121097 |
| 6  | 3.121178  | -0.816561 | 0.100355  |
| 6  | -2.110805 | -0.725930 | -0.164583 |
| 6  | 1.699261  | -0.803440 | 0.022952  |
| 6  | 0.437143  | 1.658011  | -0.141077 |
| 12 | 3.851485  | 1.535656  | 0.091643  |
| 6  | 1.296639  | 0.525784  | -0.070251 |
| 6  | 1.816581  | 1.883682  | -0.098679 |

16

141.286243 Kcal/mol 6.126759 eV -101.158526 H Child\_2\_33.log

|    |           |           |           |
|----|-----------|-----------|-----------|
| 8  | 5.748400  | -0.198198 | 0.273827  |
| 12 | -2.098601 | 2.575372  | 0.373545  |
| 6  | 4.585847  | -0.246073 | 0.175978  |
| 8  | -0.250085 | 2.338773  | -0.331157 |
| 6  | 2.305642  | -1.342587 | 0.107686  |
| 6  | -2.572877 | 0.505103  | 0.095262  |
| 6  | 3.263299  | -0.284976 | 0.060715  |
| 6  | -0.178139 | 1.026161  | -0.396039 |
| 6  | 0.989041  | -1.224973 | -0.091854 |
| 6  | -4.617706 | -1.465214 | 0.152927  |
| 12 | -1.078944 | -1.889740 | -0.180517 |
| 6  | -3.501708 | -0.558923 | 0.183385  |
| 6  | 2.334208  | 0.820330  | -0.129972 |
| 6  | -1.363575 | 0.212147  | -0.467704 |
| 6  | -3.240858 | -1.931332 | 0.235807  |
| 6  | 1.020828  | 0.264973  | -0.235805 |

16

141.430813 Kcal/mol 6.133028 eV -101.158296 H Child\_4\_46.log

|            |           |           |                                     |
|------------|-----------|-----------|-------------------------------------|
| 8          | 4.993870  | 1.516305  | -1.274378                           |
| 8          | 4.053509  | -2.117426 | 1.740645                            |
| 6          | 3.983070  | 1.700973  | -0.760870                           |
| 6          | 1.040415  | -0.020445 | 0.799252                            |
| 6          | -3.647660 | 0.329872  | 1.071846                            |
| 6          | 4.688319  | -1.703745 | 0.877964                            |
| 12         | -3.122548 | -1.577534 | -0.886880                           |
| 12         | -0.248587 | 1.810554  | 0.391986                            |
| 6          | -1.863999 | 2.119485  | 1.647225                            |
| 6          | 0.572794  | -1.112575 | 0.338720                            |
| 6          | -2.819288 | 1.328717  | 1.506219                            |
| 6          | -0.086148 | -1.648781 | -0.684405                           |
| 6          | -0.845159 | 1.262962  | -1.620137                           |
| 6          | -1.061501 | 0.044552  | -1.849072                           |
| 6          | -4.195512 | -0.644775 | 0.509064                            |
| 6          | -1.086233 | -1.320783 | -1.467709                           |
| 16         |           |           |                                     |
| 141.652278 | Kcal/mol  | 6.142632  | eV -101.157943 H MutD_17_40.log     |
| 6          | -3.519252 | -0.886191 | -0.489867                           |
| 6          | -3.314964 | -2.117739 | -0.381227                           |
| 6          | -2.740381 | -3.366443 | -0.073963                           |
| 6          | -1.582492 | -2.937273 | 0.291451                            |
| 6          | 6.170306  | 0.452176  | -0.148592                           |
| 6          | -1.906205 | 3.411952  | 0.470391                            |
| 8          | 1.282367  | -0.892908 | 0.151371                            |
| 6          | 4.939931  | 0.067020  | -0.215230                           |
| 6          | 2.468721  | -0.586951 | -0.016162                           |
| 12         | -3.799082 | 2.502667  | -0.355799                           |
| 6          | -1.706162 | 2.151123  | 0.412615                            |
| 12         | -0.635547 | -0.989754 | 0.523305                            |
| 8          | 7.328676  | 0.767929  | -0.144765                           |
| 6          | -3.189674 | 0.427998  | -0.302710                           |
| 6          | 3.675290  | -0.244223 | -0.133953                           |
| 6          | -1.907253 | 0.769361  | 0.243426                            |
| 16         |           |           |                                     |
| 141.695707 | Kcal/mol  | 6.144515  | eV -101.157874 H MutD_17_62.log     |
| 6          | 1.388781  | 2.918070  | 0.807378                            |
| 6          | -0.804686 | -1.176197 | 1.434254                            |
| 12         | 2.781196  | 1.805809  | -0.210574                           |
| 6          | -0.455752 | 1.311229  | 1.634891                            |
| 6          | -0.276444 | -2.192458 | 0.964012                            |
| 6          | -2.509542 | 3.588979  | -1.121562                           |
| 12         | 2.956611  | -1.590395 | -0.901713                           |
| 8          | -2.605771 | 2.488358  | -1.436724                           |
| 6          | -0.868819 | 0.147987  | 1.689208                            |
| 6          | 0.408845  | 2.298863  | 1.280236                            |
| 6          | 1.727108  | -3.135652 | -0.351749                           |
| 6          | -3.879301 | -1.624223 | -0.425457                           |
| 6          | -2.780730 | -2.151602 | -0.896891                           |
| 6          | -5.022858 | -1.098303 | -0.094280                           |
| 8          | 3.287503  | 0.179918  | -0.804551                           |
| 6          | 0.688808  | -2.875219 | 0.292899                            |
| 16         |           |           |                                     |
| 141.766431 | Kcal/mol  | 6.147582  | eV -101.157761 H Original3D_5_7.log |
| 6          | -1.372354 | -1.263704 | 0.105316                            |



|                                                              |           |           |           |
|--------------------------------------------------------------|-----------|-----------|-----------|
| 6                                                            | -1.568136 | 2.335868  | -1.066294 |
| 6                                                            | -1.579734 | 2.539715  | 0.228391  |
| 8                                                            | -1.459825 | 2.165387  | 2.643990  |
| 6                                                            | -0.100584 | -1.154842 | 0.366644  |
| 12                                                           | 1.041868  | 0.563559  | -0.638952 |
| 6                                                            | -1.533413 | 2.362778  | 1.496873  |
| 6                                                            | 0.903527  | -1.941107 | 0.929745  |
| 6                                                            | 3.029316  | -1.281974 | -0.156050 |
| 6                                                            | -2.575430 | -1.221781 | -0.338570 |
| 6                                                            | 3.287836  | -0.318873 | -0.927576 |
| 6                                                            | 2.264821  | -2.052368 | 0.709035  |
| 6                                                            | 1.692468  | -2.795292 | 1.825347  |
| 8                                                            | -4.705830 | -1.207544 | -1.563897 |
| 12                                                           | 3.679559  | 1.809023  | -1.176545 |
| 6                                                            | -3.670298 | -1.230707 | -0.981991 |
| 16                                                           |           |           |           |
| 141.862308 Kcal/mol 6.151740 eV -101.157608 H MutD_2_70.log  |           |           |           |
| 6                                                            | 4.524855  | -0.287389 | -1.158559 |
| 6                                                            | 1.567806  | -0.210476 | 0.585285  |
| 12                                                           | 0.175009  | -2.626363 | 0.485786  |
| 6                                                            | -2.492718 | 0.888430  | 0.463232  |
| 6                                                            | -2.394510 | 1.093275  | -0.988862 |
| 6                                                            | -2.611268 | -0.206306 | 1.263127  |
| 6                                                            | 0.478727  | 3.636052  | 0.241802  |
| 12                                                           | -2.199106 | -0.889120 | -1.652862 |
| 6                                                            | 1.347897  | 0.999874  | 0.527090  |
| 6                                                            | 0.710251  | 2.202763  | 0.367205  |
| 8                                                            | 5.275032  | -0.068717 | -0.315726 |
| 8                                                            | 1.696985  | -1.484239 | 0.632716  |
| 6                                                            | -0.562425 | 2.646201  | 0.099575  |
| 6                                                            | -1.765318 | -2.276223 | -0.108723 |
| 6                                                            | -1.772988 | 1.966722  | -0.099967 |
| 6                                                            | -2.278138 | -1.351350 | 0.720293  |
| 16                                                           |           |           |           |
| 142.076587 Kcal/mol 6.161032 eV -101.157267 H Child_6_56.log |           |           |           |
| 6                                                            | -4.161540 | 4.604814  | -0.628798 |
| 8                                                            | 4.409416  | 3.613958  | 1.604184  |
| 6                                                            | -1.989077 | -2.807419 | -0.056276 |
| 6                                                            | 4.663195  | 2.680549  | 0.927673  |
| 6                                                            | -2.359167 | -1.589522 | -0.233839 |
| 6                                                            | 4.891717  | 1.685992  | 0.149234  |
| 6                                                            | -2.730232 | -0.355804 | -0.403668 |
| 12                                                           | -1.128701 | -3.590940 | 1.773477  |
| 6                                                            | -3.782063 | 3.354583  | -0.569195 |
| 6                                                            | 5.003217  | 0.498916  | -0.301554 |
| 6                                                            | -3.093961 | 0.861857  | -0.480159 |
| 6                                                            | 5.104257  | -0.705417 | -0.701007 |
| 6                                                            | -3.422159 | 2.106028  | -0.551000 |
| 6                                                            | 5.127795  | -1.930666 | -1.055593 |
| 8                                                            | 5.148597  | -3.068717 | -1.381029 |
| 12                                                           | -6.869299 | -0.974508 | 0.029846  |
| 16                                                           |           |           |           |
| 142.162752 Kcal/mol 6.164768 eV -101.157130 H Child_7_9.log  |           |           |           |
| 6                                                            | -2.825080 | 0.246908  | 0.512739  |
| 6                                                            | 3.929382  | 0.970455  | 0.453071  |

|                                                               |           |           |           |
|---------------------------------------------------------------|-----------|-----------|-----------|
| 6                                                             | -1.789309 | 2.170494  | -1.173414 |
| 6                                                             | 2.612664  | 1.060469  | 0.217202  |
| 6                                                             | -2.389077 | 1.382065  | -0.218444 |
| 6                                                             | 3.035440  | -0.341830 | 0.009127  |
| 12                                                            | -2.929964 | -1.790504 | 0.202733  |
| 6                                                             | 2.316919  | -1.518298 | -0.277852 |
| 6                                                             | -1.726520 | 1.017191  | 0.966478  |
| 6                                                             | 3.662535  | -1.783622 | -0.060848 |
| 8                                                             | -1.407607 | -2.657654 | -0.320382 |
| 12                                                            | 0.759202  | 1.938191  | 0.009102  |
| 6                                                             | -0.671809 | 2.605561  | -1.562907 |
| 6                                                             | 0.999129  | -1.924094 | -0.418926 |
| 8                                                             | -0.581981 | 1.259772  | 1.461872  |
| 6                                                             | -0.159966 | -2.316830 | -0.391882 |
| 16                                                            |           |           |           |
| 142.216928 Kcal/mol 6.167117 eV -101.157043 H Child_13_30.log |           |           |           |
| 6                                                             | 16.643967 | -1.389565 | -0.361728 |
| 6                                                             | -1.446360 | 2.254181  | 0.549792  |
| 8                                                             | 17.178441 | -0.391466 | -0.136831 |
| 12                                                            | 0.557150  | 2.223745  | 0.237202  |
| 8                                                             | -6.311598 | -2.869546 | -0.143602 |
| 6                                                             | -2.474617 | 1.559063  | 0.623201  |
| 6                                                             | -5.516134 | -2.018463 | -0.014886 |
| 6                                                             | -4.678851 | -1.021815 | 0.149606  |
| 6                                                             | -4.316429 | 0.235597  | -0.553538 |
| 12                                                            | -1.144284 | -0.723169 | 0.623193  |
| 6                                                             | 0.750739  | -0.253558 | 0.294945  |
| 6                                                             | -3.980516 | 0.518643  | -1.838926 |
| 6                                                             | -3.533091 | 0.664018  | 0.645315  |
| 6                                                             | 1.676070  | 0.555047  | 0.565308  |
| 6                                                             | -3.525363 | -0.677329 | 1.034542  |
| 6                                                             | -2.914272 | 0.921045  | -2.440511 |
| 16                                                            |           |           |           |
| 142.458344 Kcal/mol 6.177586 eV -101.156659 H Child_12_12.log |           |           |           |
| 6                                                             | -2.976169 | 1.471380  | -0.001676 |
| 6                                                             | 4.553108  | -1.436301 | 0.057277  |
| 6                                                             | -4.054411 | 0.896756  | 0.064395  |
| 6                                                             | 3.085784  | -1.300673 | -0.024707 |
| 6                                                             | -1.726939 | 1.988347  | -0.036087 |
| 8                                                             | 5.167878  | -0.270636 | 0.108852  |
| 8                                                             | -5.125558 | 0.104643  | 0.097593  |
| 6                                                             | 1.900352  | -1.701354 | -0.057542 |
| 6                                                             | -0.529765 | 2.263273  | -0.055390 |
| 6                                                             | 0.564057  | -1.894583 | -0.055448 |
| 6                                                             | 0.822484  | 2.344724  | -0.056081 |
| 12                                                            | 3.645346  | 0.959902  | 0.018614  |
| 6                                                             | -4.984480 | -1.309231 | 0.060604  |
| 6                                                             | -0.676242 | -1.991602 | -0.051385 |
| 6                                                             | 2.056034  | 2.215129  | -0.043349 |
| 12                                                            | -2.690466 | -1.622172 | -0.056550 |
| 16                                                            |           |           |           |
| 142.512301 Kcal/mol 6.179926 eV -101.156573 H Child_9_25.log  |           |           |           |
| 6                                                             | 3.223938  | 2.363740  | -0.020102 |
| 6                                                             | -3.070331 | -2.008703 | 0.034357  |
| 6                                                             | 2.000205  | 2.789382  | 0.005896  |

|                                                               |           |           |           |
|---------------------------------------------------------------|-----------|-----------|-----------|
| 6                                                             | -1.735810 | -2.379031 | -0.040012 |
| 6                                                             | 3.887237  | 1.198889  | -0.037103 |
| 6                                                             | -0.582428 | -2.826043 | -0.001603 |
| 6                                                             | 0.795670  | 3.212072  | 0.026244  |
| 8                                                             | -3.208621 | -0.714002 | -0.095324 |
| 6                                                             | 4.437089  | 0.063493  | -0.051218 |
| 6                                                             | 0.761869  | -2.992683 | 0.019293  |
| 6                                                             | -0.518672 | 2.982289  | 0.036059  |
| 6                                                             | 2.004578  | -2.954061 | 0.074895  |
| 6                                                             | -1.731648 | 2.671370  | 0.029451  |
| 12                                                            | -3.182106 | 1.269732  | 0.001532  |
| 12                                                            | 3.698185  | -1.825794 | 0.010103  |
| 8                                                             | -4.669271 | -0.042442 | 0.020751  |
| 16                                                            |           |           |           |
| 143.028915 Kcal/mol 6.202329 eV -101.155749 H MutD_18_74.log  |           |           |           |
| 6                                                             | 3.704585  | 0.158728  | -0.058585 |
| 6                                                             | 4.066590  | -0.990504 | 0.243656  |
| 12                                                            | 2.747201  | -2.620442 | 0.287142  |
| 6                                                             | 1.056097  | -1.635724 | -0.456362 |
| 6                                                             | -5.039910 | -0.427239 | -0.142438 |
| 6                                                             | -2.656100 | -1.023461 | 0.230788  |
| 12                                                            | -2.397164 | 1.509976  | 0.476795  |
| 6                                                             | -1.472130 | -1.367365 | 0.111013  |
| 8                                                             | 2.020794  | 1.555950  | 0.674576  |
| 6                                                             | -0.172282 | -1.567925 | -0.141386 |
| 6                                                             | -0.471273 | 2.105741  | 0.498123  |
| 6                                                             | -6.015087 | -0.597543 | -0.987588 |
| 8                                                             | 2.802408  | 1.899356  | -1.485263 |
| 6                                                             | -3.758843 | -0.186643 | 0.169100  |
| 6                                                             | 0.737836  | 1.874274  | 0.528842  |
| 6                                                             | 2.889510  | 1.271518  | -0.442119 |
| 16                                                            |           |           |           |
| 143.356043 Kcal/mol 6.216514 eV -101.155228 H Child_5_51.log  |           |           |           |
| 12                                                            | 3.013689  | -1.271505 | -1.050947 |
| 6                                                             | -1.567096 | -4.053217 | -0.644492 |
| 6                                                             | 1.619013  | -1.671147 | 0.688974  |
| 8                                                             | -0.521013 | -4.327211 | -0.254495 |
| 6                                                             | 1.775580  | 0.872183  | 0.131662  |
| 6                                                             | -2.782024 | 2.317326  | -0.716322 |
| 6                                                             | 1.130740  | -0.375832 | 0.604347  |
| 6                                                             | -3.687520 | 1.425429  | -0.208543 |
| 6                                                             | 2.900442  | 1.466188  | 0.434063  |
| 6                                                             | -3.471969 | 0.350581  | 0.427734  |
| 6                                                             | -0.272565 | -0.292982 | 0.768703  |
| 6                                                             | -1.735088 | 2.943686  | -1.043980 |
| 8                                                             | 3.873247  | 2.131628  | 0.621927  |
| 6                                                             | -2.813170 | -0.652408 | 1.004336  |
| 6                                                             | -1.490079 | -0.626973 | 0.973584  |
| 12                                                            | -0.051644 | 1.883810  | -0.404039 |
| 16                                                            |           |           |           |
| 143.453613 Kcal/mol 6.220745 eV -101.155073 H Child_18_30.log |           |           |           |
| 8                                                             | 4.800925  | 0.563313  | 1.069865  |
| 6                                                             | -4.737071 | 1.361338  | 0.471611  |
| 6                                                             | 3.876180  | 0.351273  | 0.257912  |
| 6                                                             | -3.642765 | 0.444560  | 0.350527  |

|    |                                                                   |           |           |
|----|-------------------------------------------------------------------|-----------|-----------|
| 6  | 3.207765                                                          | 1.321546  | -0.533887 |
| 6  | -3.301637                                                         | 1.778094  | 0.384423  |
| 6  | 3.138669                                                          | -0.878697 | 0.054977  |
| 6  | -2.750952                                                         | -0.627955 | 0.107213  |
| 6  | 2.231467                                                          | -1.707288 | -0.098449 |
| 12 | -1.226910                                                         | 1.844712  | -0.227516 |
| 6  | 2.015367                                                          | 1.894099  | -0.467503 |
| 6  | -1.450837                                                         | -0.504415 | -0.485422 |
| 6  | 0.781371                                                          | 2.195353  | -0.513459 |
| 6  | -1.957156                                                         | -1.744788 | 0.061305  |
| 12 | 0.316968                                                          | -2.212959 | -0.455636 |
| 8  | -1.493813                                                         | -2.923281 | 0.262926  |
| 16 | 143.561900 Kcal/mol 6.225441 eV -101.154900 H Original3D_0_40.log |           |           |
| 6  | 1.887559                                                          | -0.605018 | 0.448745  |
| 6  | 0.760063                                                          | -1.160209 | -0.433480 |
| 6  | 1.243753                                                          | 0.017168  | 1.558905  |
| 12 | -0.668136                                                         | 2.360632  | 1.026272  |
| 12 | -0.773347                                                         | -1.643882 | 1.004733  |
| 8  | 4.198265                                                          | -0.522259 | -0.516637 |
| 6  | 0.224638                                                          | 0.620532  | 1.972955  |
| 6  | -2.902978                                                         | -1.823050 | 0.664167  |
| 6  | 0.407278                                                          | 1.159358  | -1.319109 |
| 6  | -1.980133                                                         | 0.024914  | -0.967458 |
| 6  | 0.251883                                                          | -0.274705 | -1.327566 |
| 6  | -2.728814                                                         | -0.908140 | -0.181204 |
| 6  | 3.134905                                                          | -0.577921 | 0.027018  |
| 6  | -1.838666                                                         | 1.253992  | -0.429403 |
| 6  | 0.239442                                                          | 2.323779  | -0.890780 |
| 8  | -1.060238                                                         | -0.590890 | -1.871962 |
| 16 | 143.565569 Kcal/mol 6.225600 eV -101.154894 H Child_7_28.log      |           |           |
| 12 | 2.624997                                                          | -3.218788 | 1.536989  |
| 8  | -3.413931                                                         | 3.530597  | 1.474385  |
| 6  | -0.772597                                                         | -2.901984 | -0.612637 |
| 8  | 4.529726                                                          | 2.688762  | -1.831216 |
| 6  | 0.268265                                                          | -2.378119 | -0.167529 |
| 6  | -3.623632                                                         | 2.537118  | 0.813879  |
| 6  | 3.790381                                                          | 2.271250  | -1.006476 |
| 12 | -2.640741                                                         | -2.338476 | -1.139186 |
| 6  | -3.867437                                                         | 1.522357  | 0.098868  |
| 6  | 1.833392                                                          | -0.552364 | 0.378963  |
| 6  | 2.986930                                                          | 1.795018  | -0.097127 |
| 6  | -3.876159                                                         | -0.771477 | -1.098335 |
| 6  | 2.225410                                                          | 0.700118  | 0.465376  |
| 6  | 1.394916                                                          | -1.765735 | 0.363490  |
| 6  | -3.903480                                                         | 0.354792  | -0.512055 |
| 6  | 2.087773                                                          | 2.011074  | 1.053751  |
| 16 | 143.583862 Kcal/mol 6.226393 eV -101.154865 H MutI_18_69.log      |           |           |
| 6  | -3.134019                                                         | 0.156425  | -0.217087 |
| 6  | -0.098875                                                         | 2.584529  | -0.068687 |
| 6  | -1.324427                                                         | 2.023924  | -0.210384 |
| 6  | -6.527855                                                         | -1.447704 | 0.740879  |
| 6  | -4.302064                                                         | -0.281604 | 0.109949  |

|    |                                                                   |           |            |
|----|-------------------------------------------------------------------|-----------|------------|
| 6  | 4.560577                                                          | -1.238602 | 0.400356   |
| 6  | 3.680084                                                          | -0.247637 | 0.447602   |
| 6  | 1.111003                                                          | 2.815733  | 0.116665   |
| 12 | 2.750485                                                          | 1.616774  | 0.225521   |
| 6  | -2.312503                                                         | 1.272601  | -0.241945  |
| 8  | 2.340632                                                          | -0.380834 | -0.164079  |
| 12 | -1.294645                                                         | -0.865314 | -0.446732  |
| 8  | 0.439590                                                          | -1.429884 | -0.551148  |
| 6  | 1.680787                                                          | -1.715881 | -0.409161  |
| 6  | -5.421634                                                         | -0.861480 | 0.429194   |
| 6  | 5.470281                                                          | -2.148932 | 0.298676   |
| 16 | 143.632624 Kcal/mol 6.228508 eV -101.154787 H Original3D_0_59.log |           |            |
| 6  | -0.045182                                                         | -1.649906 | -0.386427  |
| 6  | -0.245948                                                         | -0.189269 | -0.495645  |
| 6  | 3.400325                                                          | 0.391659  | 0.096364   |
| 6  | 2.193415                                                          | 1.060478  | -0.256756  |
| 6  | 0.879147                                                          | 0.706233  | -0.486447  |
| 8  | 3.299923                                                          | -0.936035 | 0.449444   |
| 6  | 1.200262                                                          | 2.093350  | -0.363180  |
| 12 | 1.789888                                                          | -1.998241 | 0.476809   |
| 6  | -1.488777                                                         | 0.479162  | -0.363343  |
| 6  | -1.305039                                                         | -2.180110 | -0.375199  |
| 6  | 4.619831                                                          | 0.966082  | 0.180516   |
| 8  | -4.796691                                                         | 0.422362  | 0.864074   |
| 12 | -0.872252                                                         | 2.490276  | 0.155102   |
| 6  | -2.493955                                                         | -1.762328 | -0.505791  |
| 6  | -2.674148                                                         | -0.346304 | -0.235384  |
| 6  | -3.879509                                                         | 0.131782  | 0.176114   |
| 16 | 143.661755 Kcal/mol 6.229771 eV -101.154741 H Original1D_2_0.log  |           |            |
| 6  | 0.000000                                                          | 0.000000  | 3.029627   |
| 6  | 0.000000                                                          | 0.000000  | 4.318047   |
| 6  | 0.000000                                                          | 0.000000  | 1.721340   |
| 6  | 0.000000                                                          | 0.000000  | 5.600562   |
| 6  | 0.000000                                                          | 0.000000  | 0.455669   |
| 12 | 0.000000                                                          | 0.000000  | 7.546666   |
| 6  | 0.000000                                                          | 0.000000  | 9.661961   |
| 12 | 0.000000                                                          | 0.000000  | -1.527918  |
| 8  | 0.000000                                                          | 0.000000  | 10.822331  |
| 8  | 0.000000                                                          | 0.000000  | -3.335550  |
| 6  | 0.000000                                                          | 0.000000  | -4.604473  |
| 6  | 0.000000                                                          | 0.000000  | -5.839401  |
| 6  | 0.000000                                                          | 0.000000  | -7.168593  |
| 6  | 0.000000                                                          | 0.000000  | -8.420949  |
| 6  | 0.000000                                                          | 0.000000  | -9.741779  |
| 6  | 0.000000                                                          | 0.000000  | -11.031884 |
| 16 | 143.951196 Kcal/mol 6.242323 eV -101.154280 H Child_13_11.log     |           |            |
| 12 | -3.396642                                                         | -1.802250 | -0.264940  |
| 8  | 3.205929                                                          | -2.112056 | -1.700175  |
| 6  | -4.065049                                                         | 0.092512  | -0.639824  |
| 6  | 2.846708                                                          | 0.980160  | -1.429771  |
| 6  | -1.723664                                                         | -2.441940 | 0.641088   |
| 6  | 3.052812                                                          | -1.644664 | -0.660835  |

|                                                               |           |           |           |
|---------------------------------------------------------------|-----------|-----------|-----------|
| 6                                                             | -3.325448 | 1.118919  | -0.608950 |
| 6                                                             | 2.096947  | 1.527668  | -0.553380 |
| 6                                                             | -0.495409 | -2.186429 | 0.959793  |
| 6                                                             | 1.147346  | 1.978403  | 0.394488  |
| 6                                                             | -2.433402 | 2.096916  | -0.490376 |
| 6                                                             | 0.001693  | 2.667015  | 0.054581  |
| 6                                                             | 0.652314  | -1.685637 | 1.315748  |
| 12                                                            | 2.111009  | -0.262226 | 0.950345  |
| 6                                                             | -1.227405 | 2.443943  | -0.240549 |
| 8                                                             | 1.326940  | 1.498618  | 1.615558  |
| 16                                                            |           |           |           |
| 144.695848 Kcal/mol 6.274614 eV -101.153093 H Child_12_16.log |           |           |           |
| 12                                                            | -0.703310 | -2.560277 | 0.381686  |
| 8                                                             | -9.542285 | -0.051899 | 0.789397  |
| 6                                                             | -0.615467 | -0.557063 | -0.650799 |
| 6                                                             | -8.434698 | -0.132489 | 0.505684  |
| 6                                                             | -1.360968 | 1.270062  | -1.760246 |
| 6                                                             | 4.057944  | 0.288105  | 1.810526  |
| 6                                                             | 0.489304  | 0.168223  | -0.155699 |
| 6                                                             | 3.531977  | 1.386254  | 1.451108  |
| 6                                                             | -0.459892 | 2.111996  | -1.393465 |
| 12                                                            | 2.300595  | -0.555355 | 0.820198  |
| 6                                                             | 2.630912  | 2.196199  | 0.802858  |
| 6                                                             | -1.543138 | 0.009911  | -1.426327 |
| 6                                                             | 1.622700  | 2.265907  | 0.099818  |
| 6                                                             | 4.351041  | -1.974204 | -1.406214 |
| 6                                                             | 0.531410  | 1.614888  | -0.534167 |
| 8                                                             | 3.545514  | -1.760495 | -0.599531 |
| 16                                                            |           |           |           |
| 144.719785 Kcal/mol 6.275652 eV -101.153055 H MutI_14_55.log  |           |           |           |
| 6                                                             | 1.515484  | -1.694629 | -0.542839 |
| 8                                                             | 0.224605  | -1.377538 | -0.489811 |
| 6                                                             | -0.848811 | -2.325489 | -0.008459 |
| 6                                                             | -5.392137 | -0.091685 | 0.951764  |
| 6                                                             | -2.588001 | 1.771821  | -0.664259 |
| 6                                                             | -4.354446 | -0.794198 | 0.655483  |
| 8                                                             | -3.463789 | 2.481393  | -0.823490 |
| 6                                                             | 4.656850  | 1.301419  | 0.678862  |
| 12                                                            | 4.283459  | -0.621183 | 0.011853  |
| 6                                                             | 3.458241  | 1.673331  | 0.570599  |
| 12                                                            | -0.692989 | 0.453836  | -0.193720 |
| 6                                                             | -1.921180 | -1.448892 | 0.136891  |
| 6                                                             | 2.742171  | -1.798744 | -0.509854 |
| 6                                                             | -3.156284 | -1.245959 | 0.402899  |
| 6                                                             | 0.916558  | 1.674514  | 0.068523  |
| 6                                                             | 2.109528  | 1.841399  | 0.375191  |
| 16                                                            |           |           |           |
| 145.062717 Kcal/mol 6.290523 eV -101.152508 H Child_1_20.log  |           |           |           |
| 6                                                             | 1.306707  | -1.119491 | -0.797386 |
| 6                                                             | -4.670436 | 2.132645  | -0.029841 |
| 8                                                             | 3.685541  | -0.638796 | -1.091668 |
| 6                                                             | -3.503718 | 1.576711  | -0.108996 |
| 6                                                             | 0.113668  | -1.318989 | -0.483425 |
| 6                                                             | -2.317912 | 0.947935  | -0.188872 |
| 6                                                             | -1.520015 | -2.034354 | 1.131029  |

|                                                               |           |           |           |
|---------------------------------------------------------------|-----------|-----------|-----------|
| 6                                                             | -1.081945 | 1.490608  | 0.172440  |
| 6                                                             | -1.916544 | -2.525035 | 2.257467  |
| 6                                                             | 0.077742  | 1.771947  | 0.520242  |
| 6                                                             | 2.493719  | -0.441826 | -0.676886 |
| 6                                                             | -2.273413 | -0.504560 | -0.638412 |
| 6                                                             | -1.170571 | -1.360753 | 0.004936  |
| 8                                                             | -3.091610 | -0.999633 | -1.409472 |
| 12                                                            | 2.051482  | 1.255083  | 0.780772  |
| 12                                                            | 4.783923  | 0.529784  | 0.305506  |
| 16                                                            |           |           |           |
| 145.075886 Kcal/mol 6.291094 eV -101.152487 H Child_9_14.log  |           |           |           |
| 8                                                             | -1.551287 | -3.128094 | -0.089382 |
| 8                                                             | 5.228236  | 1.609371  | 0.139603  |
| 6                                                             | -0.243688 | -2.851662 | -0.232614 |
| 6                                                             | 4.160850  | 1.065773  | 0.094457  |
| 6                                                             | -2.391413 | -2.099702 | 0.145924  |
| 6                                                             | -3.604619 | 4.086170  | -0.504170 |
| 6                                                             | -3.725019 | -1.680541 | 0.460611  |
| 6                                                             | 3.008081  | 0.466059  | 0.047022  |
| 6                                                             | 0.950274  | -2.573312 | -0.331424 |
| 6                                                             | -2.929894 | 3.023674  | -0.270283 |
| 6                                                             | -2.580338 | -0.777292 | 0.234621  |
| 12                                                            | 1.172844  | 1.304771  | 0.259682  |
| 12                                                            | 2.655650  | -1.500062 | -0.284559 |
| 6                                                             | -2.218593 | 1.924865  | -0.023684 |
| 6                                                             | -2.063967 | 0.533284  | 0.166138  |
| 6                                                             | -0.921263 | 1.298232  | 0.196193  |
| 16                                                            |           |           |           |
| 145.321649 Kcal/mol 6.301751 eV -101.152096 H Child_7_56.log  |           |           |           |
| 6                                                             | 2.338076  | -1.777503 | 0.247758  |
| 12                                                            | -2.424519 | 1.870589  | -0.116792 |
| 6                                                             | 1.325876  | -2.516586 | 0.191458  |
| 8                                                             | 0.334858  | 3.141697  | 0.266546  |
| 12                                                            | 6.522011  | 0.233418  | -0.493726 |
| 8                                                             | -3.896944 | 0.682022  | -0.330847 |
| 6                                                             | 0.056374  | -1.860819 | 0.144490  |
| 6                                                             | -0.273406 | 2.047341  | 0.182697  |
| 6                                                             | 0.414532  | 0.772336  | 0.232757  |
| 6                                                             | -1.254543 | -1.490417 | 0.055707  |
| 6                                                             | 1.855924  | 0.524106  | 0.280438  |
| 6                                                             | -2.644816 | -1.497030 | -0.132277 |
| 6                                                             | -0.212966 | -0.456515 | 0.193226  |
| 6                                                             | -4.036097 | -2.004278 | -0.151404 |
| 6                                                             | 2.640832  | -0.446535 | 0.318279  |
| 6                                                             | -3.655325 | -0.600406 | -0.256360 |
| 16                                                            |           |           |           |
| 145.321980 Kcal/mol 6.301765 eV -101.152095 H Child_16_25.log |           |           |           |
| 8                                                             | 5.522933  | -1.549926 | -0.061990 |
| 6                                                             | -6.663264 | -0.123901 | 1.140604  |
| 6                                                             | 4.451335  | -0.925540 | 0.000061  |
| 8                                                             | -5.353726 | -0.350472 | -1.160409 |
| 6                                                             | 3.136436  | -1.527750 | 0.015956  |
| 6                                                             | -5.665801 | -0.171622 | 0.275194  |
| 6                                                             | 4.322440  | 0.513318  | 0.055079  |
| 6                                                             | -4.311426 | -0.141890 | -0.138018 |

|                                                              |           |           |           |
|--------------------------------------------------------------|-----------|-----------|-----------|
| 6                                                            | 1.932758  | -1.804306 | 0.052766  |
| 6                                                            | -3.031778 | -0.066509 | -0.036465 |
| 6                                                            | 3.936981  | 1.689810  | 0.079367  |
| 6                                                            | -0.840267 | 1.065834  | -0.034188 |
| 12                                                           | 2.076540  | 2.468389  | -0.005494 |
| 6                                                            | -1.722888 | -0.035995 | 0.034256  |
| 12                                                           | -0.043186 | -1.338851 | 0.132975  |
| 6                                                            | 0.163159  | 1.803340  | -0.069708 |
| 16                                                           |           |           |           |
| 145.817460 Kcal/mol 6.323252 eV -101.151306 H Child_7_33.log |           |           |           |
| 6                                                            | -5.843577 | -0.342389 | -0.231895 |
| 6                                                            | 0.974448  | 6.507259  | -0.220437 |
| 12                                                           | -3.845265 | -1.364115 | -0.453183 |
| 6                                                            | 6.564839  | -0.165995 | 0.662481  |
| 6                                                            | -6.894651 | 0.127504  | 0.457409  |
| 6                                                            | 5.482494  | -0.770999 | 0.601267  |
| 6                                                            | -1.915129 | -1.931775 | -0.167740 |
| 6                                                            | 4.320595  | -1.441956 | 0.604468  |
| 6                                                            | -7.943802 | 0.500398  | 1.164090  |
| 8                                                            | -0.002425 | 6.748733  | 0.337481  |
| 6                                                            | -0.707064 | -2.078114 | 0.082025  |
| 6                                                            | 3.141897  | -1.856095 | 0.727906  |
| 8                                                            | -5.359573 | -0.448062 | -1.425395 |
| 6                                                            | 0.609610  | -2.148813 | 0.300037  |
| 6                                                            | 1.819193  | -2.094084 | 0.524845  |
| 12                                                           | 7.615504  | 0.011198  | -1.073770 |
| 16                                                           |           |           |           |
| 145.944672 Kcal/mol 6.328768 eV -101.151103 H MutD_18_42.log |           |           |           |
| 6                                                            | 2.717380  | -0.164326 | -0.474382 |
| 6                                                            | -0.430969 | 2.252530  | -0.684054 |
| 8                                                            | 1.521415  | -0.395180 | -0.679808 |
| 12                                                           | -5.273591 | 1.993290  | 0.614993  |
| 12                                                           | -0.344754 | -0.687783 | -0.460329 |
| 6                                                            | 6.382137  | 0.389765  | 0.459179  |
| 6                                                            | 5.192134  | 0.225097  | 0.029213  |
| 6                                                            | -2.223459 | -2.581946 | 0.258502  |
| 6                                                            | -3.502153 | -2.090007 | 0.338448  |
| 8                                                            | 7.511560  | 0.522121  | 0.840189  |
| 6                                                            | -0.971481 | -2.585561 | 0.127097  |
| 6                                                            | -2.610826 | 0.856370  | -0.194508 |
| 6                                                            | 3.934185  | 0.033535  | -0.252016 |
| 6                                                            | -3.772525 | 0.369212  | 0.067960  |
| 6                                                            | -4.056301 | -0.988893 | 0.240143  |
| 6                                                            | -1.465399 | 1.503957  | -0.438750 |
| 16                                                           |           |           |           |
| 145.946616 Kcal/mol 6.328852 eV -101.151100 H Child_9_41.log |           |           |           |
| 8                                                            | 3.610047  | -3.057095 | -0.419305 |
| 6                                                            | -6.992119 | 0.904537  | -0.018079 |
| 6                                                            | 2.818479  | -2.184938 | -0.219455 |
| 6                                                            | -5.752266 | 0.517709  | -0.000033 |
| 6                                                            | 1.845926  | -1.333027 | -0.003931 |
| 6                                                            | -4.510365 | 0.154070  | -0.013415 |
| 12                                                           | -0.206303 | -1.865096 | -0.306962 |
| 8                                                            | 2.943996  | 3.334618  | -1.376916 |
| 6                                                            | 1.857328  | 0.070074  | 0.410563  |



|    |                                                                   |           |           |
|----|-------------------------------------------------------------------|-----------|-----------|
| 6  | -3.259279                                                         | -0.195394 | -0.009192 |
| 6  | 0.571540                                                          | 0.575963  | 0.499798  |
| 6  | 3.118566                                                          | 2.564476  | -0.528447 |
| 6  | -0.665598                                                         | 0.760034  | 0.413362  |
| 6  | -1.860034                                                         | 0.121012  | 0.174215  |
| 6  | -2.171813                                                         | -1.165348 | -0.221101 |
| 12 | 3.336758                                                          | 1.285497  | 1.262300  |
| 16 | 146.527752 Kcal/mol 6.354053 eV -101.150174 H Child_17_14.log     |           |           |
| 12 | -2.854442                                                         | 1.937186  | 0.165367  |
| 6  | 3.832982                                                          | -0.570698 | -0.350533 |
| 6  | -3.769062                                                         | -1.130682 | -0.271341 |
| 12 | 3.157595                                                          | -2.415573 | -0.099366 |
| 8  | -4.636730                                                         | -1.924724 | -0.469235 |
| 6  | 3.383304                                                          | 0.573544  | -0.228636 |
| 6  | -2.928579                                                         | -0.158538 | -0.076138 |
| 6  | 1.252681                                                          | -2.806131 | 0.488587  |
| 6  | -1.483847                                                         | -0.096711 | 0.124747  |
| 8  | 2.973622                                                          | 1.825132  | -0.105503 |
| 6  | -0.909126                                                         | 1.245126  | 0.204535  |
| 6  | 0.215645                                                          | -2.077900 | 0.387404  |
| 6  | 1.632983                                                          | 2.176662  | -0.054998 |
| 6  | -0.733983                                                         | -1.181625 | 0.362164  |
| 6  | 0.816750                                                          | 3.274156  | -0.044920 |
| 6  | 0.301423                                                          | 1.842362  | 0.093445  |
| 16 | 146.949586 Kcal/mol 6.372345 eV -101.149501 H Child_4_34.log      |           |           |
| 12 | -5.563838                                                         | -1.556416 | -0.160168 |
| 8  | 6.518529                                                          | -1.507122 | -1.141397 |
| 8  | -2.719804                                                         | -1.537818 | 0.230259  |
| 6  | 5.490974                                                          | -1.221953 | -0.657037 |
| 6  | -1.547113                                                         | -1.118336 | 0.715856  |
| 6  | 1.906449                                                          | 2.257447  | 0.959134  |
| 6  | -3.608426                                                         | -0.701877 | -0.572846 |
| 6  | 0.968441                                                          | 2.651212  | 0.202979  |
| 6  | 4.345851                                                          | -0.927879 | -0.114734 |
| 6  | -0.447572                                                         | -0.709264 | 1.114825  |
| 6  | -0.201703                                                         | 2.723865  | -0.458645 |
| 6  | -3.131183                                                         | 0.553333  | -0.774770 |
| 6  | 3.237352                                                          | -0.623851 | 0.408022  |
| 12 | 1.385142                                                          | 0.210407  | 1.232010  |
| 6  | -2.395459                                                         | 1.551300  | -0.953119 |
| 6  | -1.325186                                                         | 2.317940  | -0.798499 |
| 16 | 147.014753 Kcal/mol 6.375171 eV -101.149397 H Original3D_14_3.log |           |           |
| 6  | 1.465437                                                          | 0.748986  | -1.053424 |
| 12 | -0.571452                                                         | 1.096015  | -1.710087 |
| 8  | 2.550254                                                          | 1.676050  | -0.567794 |
| 6  | 2.062939                                                          | 1.294312  | 0.738728  |
| 6  | 1.772669                                                          | 2.108530  | 1.755602  |
| 6  | 0.896788                                                          | 2.795085  | 2.404527  |
| 6  | 1.322744                                                          | 0.143014  | 0.189942  |
| 12 | -4.336389                                                         | -0.734736 | 0.151677  |
| 6  | -2.601018                                                         | 1.033125  | -1.559937 |
| 6  | -1.925851                                                         | -1.841692 | 1.115676  |

|                                                                   |           |           |           |
|-------------------------------------------------------------------|-----------|-----------|-----------|
| 6                                                                 | 0.342617  | -0.715481 | 0.668828  |
| 6                                                                 | -3.153825 | -2.059938 | 1.132947  |
| 6                                                                 | 4.470609  | -2.672538 | 0.041305  |
| 6                                                                 | -0.666530 | -1.362740 | 0.949109  |
| 6                                                                 | -3.720740 | 0.707254  | -1.109903 |
| 8                                                                 | 4.612130  | -2.351406 | -1.049642 |
| 16                                                                |           |           |           |
| 147.187159 Kcal/mol 6.382647 eV -101.149123 H MutI_17_61.log      |           |           |           |
| 6                                                                 | 2.073244  | -2.020509 | -0.016865 |
| 12                                                                | 2.429179  | 0.499392  | -0.042902 |
| 6                                                                 | 0.622420  | 1.468206  | 0.103510  |
| 6                                                                 | 3.350616  | -1.635431 | 0.206614  |
| 6                                                                 | 4.666293  | 1.225277  | -0.186094 |
| 6                                                                 | 0.845487  | -2.120145 | -0.158282 |
| 6                                                                 | -0.482176 | -1.987239 | -0.209831 |
| 6                                                                 | -0.563785 | 1.817619  | 0.214564  |
| 8                                                                 | 5.704835  | 1.712998  | -0.366522 |
| 6                                                                 | 4.490496  | -1.066272 | 0.346134  |
| 6                                                                 | -5.843903 | 0.422145  | -0.206925 |
| 6                                                                 | -4.688913 | 0.961603  | -0.012682 |
| 6                                                                 | -6.896956 | -0.357904 | -0.392407 |
| 12                                                                | -2.500960 | 1.226191  | 0.284188  |
| 8                                                                 | -2.601172 | -0.755028 | 0.226590  |
| 6                                                                 | -1.567480 | -1.435809 | 0.016267  |
| 16                                                                |           |           |           |
| 147.330334 Kcal/mol 6.388856 eV -101.148895 H Original3D_0_73.log |           |           |           |
| 6                                                                 | -0.262671 | 1.014622  | -0.364885 |
| 6                                                                 | 0.092564  | -0.287037 | -0.750818 |
| 12                                                                | -0.671052 | -2.776792 | -0.526700 |
| 6                                                                 | -2.557867 | -0.934684 | 0.257704  |
| 8                                                                 | 2.661385  | -0.954335 | 1.439668  |
| 6                                                                 | -3.969044 | 0.875241  | 0.013247  |
| 6                                                                 | 0.930199  | 1.755700  | -0.422445 |
| 6                                                                 | 2.167329  | -0.907245 | 2.481640  |
| 6                                                                 | 0.734261  | -1.359743 | -1.029733 |
| 12                                                                | 2.652941  | -0.472870 | -0.794245 |
| 6                                                                 | 2.289946  | 1.526482  | -0.658276 |
| 6                                                                 | -1.517234 | 1.464000  | 0.187705  |
| 6                                                                 | -2.697082 | 0.486934  | 0.173132  |
| 6                                                                 | 1.911830  | 2.856541  | -0.360577 |
| 8                                                                 | -1.671310 | 2.588781  | 0.693945  |
| 6                                                                 | -2.406108 | -2.170747 | 0.270377  |
| 16                                                                |           |           |           |
| 147.400942 Kcal/mol 6.391918 eV -101.148782 H Child_4_59.log      |           |           |           |
| 8                                                                 | 2.372100  | 2.240448  | -1.095539 |
| 8                                                                 | 2.591513  | -3.781205 | 0.327364  |
| 12                                                                | 3.089154  | 0.499143  | -1.140634 |
| 6                                                                 | 2.210387  | -2.616753 | 0.196306  |
| 6                                                                 | 1.377653  | 2.757721  | -0.505960 |
| 6                                                                 | -4.442897 | -0.923338 | -1.317547 |
| 12                                                                | -3.360213 | -0.395329 | 0.223890  |
| 6                                                                 | 0.317683  | 3.079175  | 0.043734  |
| 6                                                                 | -5.001342 | -1.706226 | -2.149067 |
| 6                                                                 | 0.371322  | -0.833938 | 1.239195  |
| 6                                                                 | -1.850032 | 0.531551  | 1.421920  |

|                                                                   |           |           |           |
|-------------------------------------------------------------------|-----------|-----------|-----------|
| 6                                                                 | -1.550077 | 1.865904  | 1.275585  |
| 6                                                                 | 1.424049  | -1.481917 | 0.628146  |
| 6                                                                 | 2.513936  | -1.275881 | -0.240543 |
| 6                                                                 | -0.684297 | -0.243267 | 1.516045  |
| 6                                                                 | -0.762419 | 2.693682  | 0.749908  |
| 16                                                                |           |           |           |
| 147.606913 Kcal/mol 6.400850 eV -101.148454 H Original3D_12_7.log |           |           |           |
| 8                                                                 | 0.808087  | -1.061967 | -1.290190 |
| 12                                                                | 0.970197  | -2.020430 | 0.426952  |
| 6                                                                 | -0.933261 | -2.508841 | 1.119254  |
| 6                                                                 | -1.506040 | 0.652634  | -1.098149 |
| 6                                                                 | -2.022142 | 0.721969  | 0.260200  |
| 6                                                                 | -2.343471 | -0.649628 | 0.007915  |
| 6                                                                 | 0.865601  | 0.273018  | -1.277219 |
| 6                                                                 | 2.094139  | 0.689636  | -0.527575 |
| 6                                                                 | -1.839001 | -1.752641 | 0.714079  |
| 6                                                                 | -0.195872 | 1.154006  | -1.256280 |
| 6                                                                 | 1.821555  | 0.998522  | 0.895165  |
| 12                                                                | 0.056110  | 2.231542  | 0.645361  |
| 6                                                                 | 3.363304  | 0.088224  | -0.253969 |
| 8                                                                 | -1.793826 | 1.577643  | 1.186605  |
| 6                                                                 | 2.383417  | -0.314188 | 0.900701  |
| 6                                                                 | -2.426524 | -0.462503 | -1.490637 |
| 16                                                                |           |           |           |
| 147.645571 Kcal/mol 6.402526 eV -101.148392 H Original2D_8_2.log  |           |           |           |
| 8                                                                 | 0.000000  | -0.808132 | 0.000000  |
| 12                                                                | -1.491138 | 0.989973  | -0.000000 |
| 6                                                                 | 1.986438  | 0.273875  | 0.000000  |
| 6                                                                 | 1.385946  | -0.953323 | 0.000000  |
| 6                                                                 | 2.591291  | 1.361077  | 0.000000  |
| 6                                                                 | 2.746650  | 2.699254  | -0.000000 |
| 8                                                                 | -0.798333 | 2.659569  | -0.000000 |
| 6                                                                 | -2.859223 | -0.611927 | -0.000000 |
| 6                                                                 | 2.585240  | 3.950212  | -0.000000 |
| 6                                                                 | -0.757358 | -2.059687 | 0.000000  |
| 6                                                                 | -2.125919 | -1.802484 | 0.000000  |
| 12                                                                | 0.477554  | 3.910741  | -0.000000 |
| 6                                                                 | 0.878915  | -5.605387 | 0.000000  |
| 6                                                                 | -0.121285 | -3.221088 | 0.000000  |
| 6                                                                 | 0.338233  | -4.420230 | 0.000000  |
| 6                                                                 | -3.557315 | -1.880300 | -0.000000 |
| 16                                                                |           |           |           |
| 147.724088 Kcal/mol 6.405931 eV -101.148267 H Child_3_33.log      |           |           |           |
| 6                                                                 | -4.942736 | -4.427979 | -0.869635 |
| 8                                                                 | 4.452380  | -0.695228 | 0.778454  |
| 8                                                                 | -4.463626 | -3.382472 | -0.841828 |
| 6                                                                 | 2.145514  | -0.173654 | 0.230061  |
| 6                                                                 | 2.009404  | 0.905634  | -0.483145 |
| 12                                                                | -2.935408 | 2.450879  | 0.495227  |
| 6                                                                 | 1.526556  | 1.970796  | -1.066196 |
| 12                                                                | -1.818249 | 0.165984  | 1.832586  |
| 6                                                                 | 3.484801  | -1.122653 | 0.145366  |
| 6                                                                 | -1.795289 | 3.563839  | -0.887864 |
| 6                                                                 | 0.593429  | 2.777755  | -1.302634 |
| 6                                                                 | 0.042558  | -0.689219 | 1.737414  |

|                                                              |           |           |           |
|--------------------------------------------------------------|-----------|-----------|-----------|
| 6                                                            | 3.172348  | -2.207665 | -0.618084 |
| 6                                                            | -0.605525 | 3.370541  | -1.247407 |
| 6                                                            | 1.090873  | -0.540203 | 1.090447  |
| 6                                                            | 2.800375  | -3.223987 | -1.299450 |
| 16                                                           |           |           |           |
| 147.881079 Kcal/mol 6.412739 eV -101.148017 H Child_5_25.log |           |           |           |
| 8                                                            | 0.855025  | 3.695955  | -0.030177 |
| 6                                                            | 3.331523  | -2.666263 | -0.180804 |
| 6                                                            | -0.882729 | 2.084777  | 0.040405  |
| 6                                                            | 2.176623  | -2.153837 | 0.081155  |
| 6                                                            | 0.472245  | 2.509460  | 0.062526  |
| 6                                                            | -5.323332 | -1.838415 | -0.172736 |
| 6                                                            | -1.979853 | 1.484851  | -0.070034 |
| 6                                                            | 1.021990  | -1.352417 | 0.300055  |
| 8                                                            | -3.084748 | 0.836925  | -0.188362 |
| 6                                                            | -4.190343 | -1.233861 | -0.145459 |
| 6                                                            | 1.381451  | 1.356411  | 0.154663  |
| 6                                                            | -3.004743 | -0.621729 | -0.042046 |
| 6                                                            | 2.589172  | 0.796825  | 0.018516  |
| 6                                                            | 1.364823  | -0.042880 | 0.253898  |
| 12                                                           | 4.037348  | -0.732364 | -0.298652 |
| 12                                                           | -1.029279 | -1.451017 | 0.294276  |
| 16                                                           |           |           |           |
| 147.927936 Kcal/mol 6.414771 eV -101.147942 H Child_2_44.log |           |           |           |
| 6                                                            | -2.490108 | -2.052296 | 0.820977  |
| 8                                                            | 4.788126  | -0.684482 | 1.262241  |
| 12                                                           | -4.046327 | -0.612209 | 0.825561  |
| 6                                                            | 3.759533  | -0.352752 | 0.855391  |
| 6                                                            | -1.435614 | -1.583145 | 0.273946  |
| 6                                                            | 2.243048  | 2.732508  | 0.045476  |
| 6                                                            | -4.231499 | 1.305314  | 0.271912  |
| 6                                                            | 2.095475  | 1.313383  | 0.094229  |
| 6                                                            | -0.507055 | -0.893472 | -0.398599 |
| 6                                                            | 2.540038  | -0.048823 | 0.259391  |
| 6                                                            | 0.780792  | -1.269658 | -0.962141 |
| 6                                                            | 0.972595  | 2.020326  | -0.242135 |
| 6                                                            | -3.039979 | 1.466372  | -0.121582 |
| 6                                                            | 1.959943  | -1.225410 | -0.154417 |
| 8                                                            | 0.817459  | -1.518016 | -2.203043 |
| 12                                                           | -1.014314 | 1.374368  | -0.569585 |
| 16                                                           |           |           |           |
| 147.985445 Kcal/mol 6.417264 eV -101.147851 H Child_5_48.log |           |           |           |
| 6                                                            | 1.142755  | 3.304706  | 0.414765  |
| 6                                                            | 1.738246  | -2.630605 | 0.764042  |
| 6                                                            | -5.308092 | 1.408358  | 0.402414  |
| 6                                                            | 0.591035  | -2.959969 | 0.303438  |
| 6                                                            | 0.130814  | 2.459358  | 0.223070  |
| 6                                                            | -0.577588 | -3.237162 | -0.161853 |
| 8                                                            | -4.246576 | 1.030474  | 0.153657  |
| 6                                                            | 2.417313  | -1.521749 | 1.110188  |
| 6                                                            | -0.736566 | 1.504506  | 0.013387  |
| 6                                                            | -1.668841 | -2.521781 | -0.497392 |
| 8                                                            | 3.001122  | 0.820055  | -1.350776 |
| 6                                                            | 2.950306  | -0.398300 | 1.334290  |
| 6                                                            | 3.672134  | 0.519580  | -2.228011 |

|                                                              |           |           |           |
|--------------------------------------------------------------|-----------|-----------|-----------|
| 6                                                            | -2.650305 | -1.766978 | -0.767364 |
| 12                                                           | -2.301321 | 0.234344  | -0.376616 |
| 12                                                           | 2.281018  | 1.451987  | 0.719208  |
| 16                                                           |           |           |           |
| 147.996309 Kcal/mol 6.417735 eV -101.147833 H MutD_3_70.log  |           |           |           |
| 12                                                           | 4.141820  | -0.594892 | -0.655326 |
| 6                                                            | -1.076746 | 2.008930  | 0.099802  |
| 8                                                            | -4.926131 | -0.826175 | -1.003109 |
| 12                                                           | 0.950280  | 1.426022  | 0.318374  |
| 6                                                            | 2.625034  | -2.067381 | -0.792947 |
| 8                                                            | -0.509763 | -1.377506 | 2.091465  |
| 6                                                            | -2.646710 | -0.094354 | -0.152719 |
| 6                                                            | -2.220806 | 1.281112  | -0.088358 |
| 6                                                            | 4.260280  | 1.321784  | -0.081678 |
| 6                                                            | 0.528632  | -0.862613 | 0.147010  |
| 6                                                            | -1.974983 | -1.234866 | 0.225377  |
| 6                                                            | -2.370970 | 2.700708  | -0.119743 |
| 6                                                            | 3.030367  | 1.497287  | 0.157547  |
| 6                                                            | 1.507916  | -1.591777 | -0.400942 |
| 6                                                            | -3.897203 | -0.473281 | -0.614619 |
| 6                                                            | -0.701151 | -1.209567 | 0.844030  |
| 16                                                           |           |           |           |
| 147.998345 Kcal/mol 6.417824 eV -101.147830 H Child_8_19.log |           |           |           |
| 6                                                            | -1.782346 | 2.695911  | 0.003162  |
| 8                                                            | 5.874961  | 0.608498  | -0.036196 |
| 6                                                            | -3.033569 | 2.418746  | -0.033678 |
| 6                                                            | 4.676353  | 0.478798  | -0.015239 |
| 8                                                            | -3.912294 | 1.376400  | -0.037057 |
| 6                                                            | 3.400329  | 0.338375  | -0.001275 |
| 12                                                           | 0.217105  | 1.912440  | 0.034656  |
| 6                                                            | 0.801399  | -2.694119 | 0.001398  |
| 6                                                            | -2.887494 | 0.356980  | 0.001906  |
| 6                                                            | 1.529273  | -1.689335 | 0.008000  |
| 6                                                            | -1.665454 | 0.984340  | 0.024731  |
| 12                                                           | -1.131984 | -3.252648 | -0.004724 |
| 6                                                            | 2.167443  | -0.461530 | 0.016490  |
| 6                                                            | 1.991572  | 0.871135  | 0.027602  |
| 6                                                            | -2.893437 | -2.245618 | 0.003772  |
| 6                                                            | -3.091198 | -1.019801 | 0.000940  |
| 16                                                           |           |           |           |
| 148.065269 Kcal/mol 6.420726 eV -101.147723 H Child_2_12.log |           |           |           |
| 6                                                            | -1.140902 | -2.919487 | 0.196467  |
| 12                                                           | -2.016272 | 1.628444  | 0.049985  |
| 6                                                            | 0.071149  | -3.318510 | 0.140900  |
| 6                                                            | 3.140817  | 0.930648  | -0.277535 |
| 6                                                            | -2.525604 | -0.903921 | 0.306021  |
| 6                                                            | 2.331409  | 1.843384  | -0.158735 |
| 8                                                            | -2.163850 | -0.038586 | 1.237474  |
| 8                                                            | 0.896817  | 3.796360  | 0.642619  |
| 6                                                            | -3.074542 | -0.314013 | -0.859598 |
| 6                                                            | 3.639489  | -0.343562 | -0.300077 |
| 6                                                            | -2.242482 | -2.254882 | 0.412537  |
| 6                                                            | 1.176492  | 2.595678  | 0.026809  |
| 6                                                            | 3.764636  | -1.575930 | -0.256363 |
| 6                                                            | -0.125980 | 2.435359  | -0.160863 |

|                                                                  |           |           |           |
|------------------------------------------------------------------|-----------|-----------|-----------|
| 6                                                                | -3.324893 | 0.620168  | -1.666263 |
| 12                                                               | 2.016167  | -2.531094 | -0.005028 |
| 16                                                               |           |           |           |
| 148.362087 Kcal/mol 6.433597 eV -101.147250 H Original3D_3_4.log |           |           |           |
| 6                                                                | 3.695525  | 0.542400  | -0.641162 |
| 6                                                                | -1.706371 | -1.853702 | 0.929802  |
| 12                                                               | 2.299631  | 1.920128  | 0.025936  |
| 6                                                                | -2.687487 | -1.071589 | 1.089158  |
| 6                                                                | -2.360879 | 1.725629  | -0.516473 |
| 6                                                                | 0.952829  | 0.499016  | 0.809034  |
| 6                                                                | 1.566271  | -0.666303 | 0.349159  |
| 8                                                                | -2.639232 | 2.491721  | 0.347944  |
| 6                                                                | -0.406105 | -2.230510 | 0.646719  |
| 8                                                                | -1.767134 | -1.487028 | -2.134390 |
| 6                                                                | 0.759228  | -1.847667 | 0.447781  |
| 12                                                               | -1.015212 | 0.265273  | 1.537274  |
| 6                                                                | -1.952303 | 0.864202  | -1.375392 |
| 6                                                                | -1.835920 | -0.360881 | -1.825611 |
| 6                                                                | 4.351699  | -0.753003 | -0.453158 |
| 6                                                                | 2.929832  | -0.557984 | -0.204350 |
| 16                                                               |           |           |           |
| 148.898364 Kcal/mol 6.456852 eV -101.146396 H Child_11_44.log    |           |           |           |
| 8                                                                | -5.536056 | 1.434428  | -0.053054 |
| 6                                                                | 3.121994  | -1.967817 | -0.037822 |
| 6                                                                | -4.443089 | 1.008138  | 0.047320  |
| 8                                                                | 5.708935  | 0.491183  | 0.288090  |
| 6                                                                | -3.219409 | 0.453309  | 0.056208  |
| 6                                                                | 3.289515  | -0.487427 | -0.076433 |
| 6                                                                | -3.092547 | -0.973451 | 0.083276  |
| 6                                                                | 4.455223  | 0.616458  | 0.057290  |
| 6                                                                | -3.417245 | -2.377882 | 0.013397  |
| 6                                                                | 2.022089  | -1.110308 | -0.132620 |
| 6                                                                | -1.958414 | 1.125714  | 0.094357  |
| 6                                                                | 3.251031  | 1.171248  | -0.294860 |
| 12                                                               | 1.294255  | 1.729702  | -0.042077 |
| 12                                                               | -0.018006 | -1.518173 | -0.085228 |
| 6                                                                | -0.739293 | 1.401771  | 0.008242  |
| 6                                                                | -2.052855 | -1.850292 | 0.122873  |
| 16                                                               |           |           |           |
| 148.926533 Kcal/mol 6.458074 eV -101.146351 H Child_17_28.log    |           |           |           |
| 12                                                               | -7.307125 | -0.971091 | 0.653461  |
| 6                                                                | 6.745188  | -0.498883 | 1.771800  |
| 8                                                                | -5.914953 | 0.273910  | 0.426421  |
| 6                                                                | 5.690710  | -0.268636 | 1.067619  |
| 6                                                                | -4.682584 | 0.539831  | 0.259798  |
| 6                                                                | 3.962760  | 1.114047  | -0.105358 |
| 6                                                                | -3.483708 | 0.766949  | 0.077934  |
| 6                                                                | 4.562719  | -0.093857 | 0.341810  |
| 6                                                                | -2.181957 | 1.027650  | -0.130767 |
| 8                                                                | 0.315925  | -2.005814 | -1.359058 |
| 6                                                                | -0.983331 | 1.292949  | -0.351412 |
| 6                                                                | 1.224197  | -1.434847 | -0.801309 |
| 6                                                                | 2.524407  | -1.537923 | -0.396294 |
| 6                                                                | 3.016424  | 1.835899  | -0.479387 |
| 12                                                               | 1.017955  | 1.324291  | -0.648026 |

|            |           |           |                                 |
|------------|-----------|-----------|---------------------------------|
| 6          | 3.648886  | -1.140374 | -0.021788                       |
| 16         |           |           |                                 |
| 149.111411 | Kcal/mol  | 6.466091  | eV -101.146056 H Child_5_24.log |
| 12         | -8.320089 | -0.678887 | -0.012433                       |
| 8          | 4.966982  | -2.327956 | -0.802530                       |
| 6          | -1.094666 | -3.253457 | -0.479524                       |
| 6          | 4.158684  | -1.743108 | -0.194182                       |
| 8          | -0.759056 | -2.330490 | 0.117805                        |
| 6          | 3.259026  | -1.104308 | 0.490872                        |
| 6          | 0.068664  | 1.613079  | -2.112392                       |
| 6          | 2.388498  | -0.406631 | 1.091201                        |
| 6          | -1.589121 | 0.766022  | 0.768848                        |
| 6          | 2.399959  | 2.276533  | 0.548162                        |
| 6          | 1.178585  | 2.003909  | -1.716235                       |
| 12         | 1.043408  | 1.184934  | 1.780084                        |
| 6          | -1.692341 | 0.864128  | -0.590290                       |
| 6          | 2.009524  | 2.204157  | -0.648758                       |
| 6          | -1.129479 | 1.142165  | -1.661007                       |
| 6          | -1.014538 | 0.836678  | 1.880970                        |
| 16         |           |           |                                 |
| 149.455164 | Kcal/mol  | 6.480997  | eV -101.145508 H Child_5_19.log |
| 8          | 0.944379  | 5.078249  | -1.100523                       |
| 8          | 4.542360  | -1.549589 | -0.857883                       |
| 6          | 3.423832  | -1.383848 | -0.544846                       |
| 6          | 0.809277  | 3.987159  | -1.061262                       |
| 6          | 0.326439  | 1.416140  | 2.205629                        |
| 6          | -3.819066 | 0.245153  | -0.784960                       |
| 6          | 2.249105  | -1.229039 | -0.020667                       |
| 6          | -3.405186 | -0.920669 | -0.764647                       |
| 12         | 1.620743  | 0.067442  | 1.479634                        |
| 6          | -2.551958 | -2.002425 | -0.349027                       |
| 6          | 1.087665  | -1.910758 | -0.272832                       |
| 6          | -0.614426 | 1.528396  | 1.376464                        |
| 6          | -0.058929 | -2.381190 | -0.450263                       |
| 12         | -2.305215 | 1.295307  | 0.230576                        |
| 6          | -1.305619 | -2.368905 | -0.991207                       |
| 6          | -2.087842 | -2.410392 | 0.848406                        |
| 16         |           |           |                                 |
| 150.032849 | Kcal/mol  | 6.506048  | eV -101.144588 H Child_4_11.log |
| 6          | -2.093138 | -2.035257 | -0.046392                       |
| 8          | 3.667788  | 2.330232  | -0.138953                       |
| 6          | -3.141005 | -1.117580 | 0.026635                        |
| 6          | 2.785753  | 1.556152  | 0.026858                        |
| 6          | -4.171681 | -0.225137 | 0.168793                        |
| 8          | 5.051389  | -0.290648 | 0.167336                        |
| 12         | -0.173358 | -2.610838 | -0.083327                       |
| 12         | 0.588245  | 0.803802  | -0.063272                       |
| 6          | -1.831916 | -0.536006 | -0.100817                       |
| 6          | -3.700515 | 2.492820  | 0.040934                        |
| 6          | -4.056925 | 1.063767  | 0.127081                        |
| 6          | 3.835975  | -0.383430 | 0.087498                        |
| 6          | 1.396707  | -1.253722 | -0.023209                       |
| 6          | 2.683863  | -1.112478 | 0.068796                        |
| 6          | -1.515805 | 0.800070  | -0.098491                       |
| 6          | -2.646657 | 1.645427  | -0.022334                       |

16  
150.134267 Kcal/mol 6.510446 eV -101.144426 H MutD\_12\_64.log  
6 1.173078 -2.887280 -0.097932  
12 -0.764824 -3.287283 -0.334201  
6 1.701375 -1.771347 0.021588  
6 4.566456 0.364134 0.357476  
6 3.348934 -0.025966 0.290606  
6 -2.706836 0.427125 0.237121  
6 -2.378943 -0.754637 -0.302373  
6 -0.289670 3.123094 -0.518726  
8 -0.061028 4.270921 -0.634151  
6 -2.340535 -1.997243 -0.476512  
6 2.069740 -0.398466 0.139883  
6 -5.224961 0.908351 0.888632  
6 5.795374 0.766038 0.321567  
12 -0.753407 0.909091 -0.004710  
6 -4.017203 0.621266 0.522534  
8 1.065768 0.515065 0.104618

16  
150.280823 Kcal/mol 6.516801 eV -101.144193 H Child\_1\_44.log  
12 3.665952 -0.767664 -0.427952  
6 -4.125265 -1.533665 -0.072091  
6 3.833580 1.013390 0.619968  
6 -3.144835 -0.757593 -0.380971  
6 2.632715 1.377977 0.654206  
6 -2.195669 0.175801 -0.462314  
6 1.301392 0.982330 0.265937  
12 -2.552434 2.292990 -0.084622  
6 -1.172271 -3.294608 1.040533  
6 -0.783526 0.124792 -0.494034  
6 1.372679 -0.254608 -0.358130  
6 0.202410 -0.856732 -0.836714  
8 -0.730747 2.392253 0.482159  
6 1.653595 -1.429523 -0.959374  
6 -0.067971 1.303936 0.154678  
8 -0.569656 -2.318865 0.907930

16  
150.449953 Kcal/mol 6.524136 eV -101.143923 H MutD\_3\_76.log  
8 -7.963678 -2.337030 1.000227  
6 0.881321 1.334843 0.347987  
6 3.365495 -3.543517 -0.745603  
6 1.987151 1.070468 1.189969  
12 3.628748 -1.281197 1.268401  
6 2.983203 0.584303 1.742655  
6 -1.113968 2.252985 -0.695427  
12 1.467508 -1.361937 -1.186556  
8 -2.074496 2.937079 -1.024036  
6 2.964471 -2.431303 -0.286562  
6 -0.673348 -0.067570 -2.129744  
6 -0.115466 2.454442 0.423362  
6 0.571114 0.475441 -0.683569  
6 -6.886052 -2.063998 0.716692  
6 -0.116990 3.437892 1.323162  
6 -0.655210 0.982217 -1.334868

16



150.455893 Kcal/mol 6.524393 eV -101.143914 H MutI\_16\_79.log

|    |           |           |           |
|----|-----------|-----------|-----------|
| 8  | -3.347617 | 2.301824  | 0.606431  |
| 6  | -3.313759 | -0.746306 | 0.139022  |
| 6  | 2.734957  | -1.203404 | 1.092964  |
| 6  | 4.045899  | -1.189002 | 0.846426  |
| 6  | 1.327548  | 2.170473  | -0.919885 |
| 6  | 2.557493  | 2.005063  | -0.956612 |
| 8  | -0.417227 | -3.126947 | -1.744891 |
| 6  | -0.009422 | 2.175930  | -0.684364 |
| 6  | -4.154282 | -1.648351 | -0.281562 |
| 6  | -1.175767 | 2.044257  | -0.321632 |
| 6  | -2.403105 | 1.578206  | 0.260596  |
| 6  | -0.560120 | -2.425237 | -0.853449 |
| 12 | -0.518273 | -0.910594 | 0.941941  |
| 6  | -2.342448 | 0.110257  | 0.484120  |
| 6  | 1.453963  | -1.316784 | 1.249284  |
| 12 | 3.947691  | 0.683125  | -0.210422 |

16

150.545539 Kcal/mol 6.528281 eV -101.143771 H MutI\_4\_67.log

|    |           |           |           |
|----|-----------|-----------|-----------|
| 6  | 1.664355  | -1.485971 | -0.028994 |
| 6  | 0.922353  | -0.298555 | -0.068029 |
| 12 | -3.333332 | 1.898313  | -0.080605 |
| 6  | 1.520533  | 3.106342  | 0.070392  |
| 12 | -0.419611 | 2.391148  | 0.124647  |
| 6  | 3.466501  | -0.103750 | -0.040262 |
| 6  | -1.276262 | -0.966665 | 0.019527  |
| 6  | -0.336907 | 0.080444  | -0.042330 |
| 6  | -0.639857 | -2.410294 | 0.056880  |
| 8  | 3.096350  | -1.395101 | -0.049353 |
| 8  | -1.410048 | -3.373132 | 0.133772  |
| 6  | -3.790138 | -0.243380 | -0.116642 |
| 6  | 2.453884  | 2.278651  | 0.008792  |
| 6  | -2.636562 | -0.744100 | 0.029357  |
| 6  | 0.824213  | -2.505206 | -0.045305 |
| 6  | 3.085370  | 1.071206  | -0.044027 |

16

150.694330 Kcal/mol 6.534733 eV -101.143534 H Child\_2\_46.log

|    |           |           |           |
|----|-----------|-----------|-----------|
| 8  | -4.621234 | 0.838222  | -2.387512 |
| 12 | 3.442088  | 1.756516  | -0.726321 |
| 6  | -4.524463 | 0.005700  | -3.166687 |
| 6  | 3.970398  | -0.189655 | -0.635929 |
| 6  | -1.880254 | -0.619937 | 1.654472  |
| 6  | 1.913446  | 3.017103  | -0.373944 |
| 6  | -1.236681 | -1.693978 | 1.076016  |
| 6  | 3.287570  | -1.229157 | -0.557362 |
| 6  | -2.926353 | -0.081618 | 2.477179  |
| 6  | 0.795230  | 3.084182  | 0.185892  |
| 6  | -1.876313 | 0.743325  | 1.877868  |
| 6  | 2.362349  | -2.225228 | -0.451445 |
| 6  | -0.639414 | -2.615846 | 0.544250  |
| 12 | -0.806538 | 2.386271  | 1.213170  |
| 8  | 0.189758  | -3.476016 | -0.035915 |
| 6  | 1.392020  | -2.963408 | -0.372773 |

16

150.735522 Kcal/mol 6.536519 eV -101.143468 H Child\_10\_55.log

|                                                               |           |           |           |
|---------------------------------------------------------------|-----------|-----------|-----------|
| 6                                                             | -3.802605 | -1.157758 | -0.666435 |
| 8                                                             | 0.587346  | 1.282932  | 1.389446  |
| 6                                                             | -4.182704 | 1.271510  | -1.534478 |
| 6                                                             | 1.670650  | -1.986732 | 0.730135  |
| 6                                                             | -4.220115 | 0.161801  | -0.628062 |
| 6                                                             | 0.641038  | -2.597194 | 0.338296  |
| 6                                                             | -2.961079 | -2.055980 | -0.614444 |
| 8                                                             | 10.347095 | 0.560187  | -0.965732 |
| 6                                                             | -1.783357 | -2.686375 | -0.423116 |
| 6                                                             | 9.181646  | 0.783250  | -0.825574 |
| 6                                                             | -4.478146 | 1.121236  | 0.425540  |
| 12                                                            | 1.776433  | -0.042435 | 1.403873  |
| 6                                                             | -3.600331 | 2.157701  | -0.302649 |
| 6                                                             | -2.493217 | 2.812668  | -0.081048 |
| 6                                                             | -0.604815 | -2.869046 | -0.105866 |
| 12                                                            | -0.749542 | 1.336148  | 0.157502  |
| 16                                                            |           |           |           |
| 150.737708 Kcal/mol 6.536614 eV -101.143465 H Child_8_41.log  |           |           |           |
| 8                                                             | 3.508303  | -1.846354 | 0.173738  |
| 6                                                             | -5.259652 | 1.254921  | 0.384092  |
| 6                                                             | -0.281100 | -1.986762 | -0.295445 |
| 6                                                             | -4.037954 | 0.883919  | 0.259829  |
| 6                                                             | 2.274238  | -2.116351 | -0.027715 |
| 8                                                             | -1.641087 | 1.065135  | 0.226504  |
| 6                                                             | 1.058822  | -2.175847 | -0.206639 |
| 6                                                             | -2.756786 | 0.409975  | 0.111237  |
| 6                                                             | -1.475390 | -1.673389 | -0.319628 |
| 6                                                             | 2.201672  | 1.320324  | 0.102480  |
| 12                                                            | 3.852474  | 0.030606  | 0.352016  |
| 6                                                             | -2.716172 | -1.024327 | -0.210329 |
| 6                                                             | 2.199397  | 3.845822  | -0.672454 |
| 6                                                             | -3.993875 | -1.500939 | -0.326596 |
| 6                                                             | 2.222952  | 2.594144  | -0.265753 |
| 12                                                            | 0.184639  | 0.574462  | 0.114617  |
| 16                                                            |           |           |           |
| 151.107244 Kcal/mol 6.552639 eV -101.142876 H MutI_17_47.log  |           |           |           |
| 6                                                             | -1.635158 | 0.099724  | -0.558773 |
| 6                                                             | 0.401560  | 1.027619  | -0.247382 |
| 8                                                             | -0.292433 | -3.661649 | -0.052661 |
| 6                                                             | 0.174941  | -2.596361 | -0.252370 |
| 6                                                             | -2.416178 | 1.198598  | -0.343334 |
| 6                                                             | -0.250840 | -0.165858 | -0.511614 |
| 6                                                             | -3.077097 | -0.139940 | -0.585347 |
| 6                                                             | 1.959632  | -1.064645 | -0.941699 |
| 12                                                            | 2.663935  | 1.553803  | -0.922033 |
| 8                                                             | 1.318615  | -0.887065 | 2.845040  |
| 6                                                             | -4.190150 | -0.826509 | -0.661276 |
| 6                                                             | 0.454322  | -0.125135 | 2.828625  |
| 6                                                             | 0.833413  | 2.199532  | 0.018823  |
| 6                                                             | 2.978184  | -0.432429 | -1.309703 |
| 12                                                            | -1.269378 | 2.578219  | 0.633949  |
| 6                                                             | 0.610014  | -1.373688 | -0.582955 |
| 16                                                            |           |           |           |
| 151.238351 Kcal/mol 6.558324 eV -101.142667 H Child_12_33.log |           |           |           |
| 8                                                             | 6.328280  | -3.863328 | -0.030894 |

|                                                                   |           |           |           |
|-------------------------------------------------------------------|-----------|-----------|-----------|
| 6                                                                 | -6.883000 | -3.252785 | 1.006304  |
| 6                                                                 | 4.164561  | 0.671703  | 0.122656  |
| 6                                                                 | -5.955152 | -2.491711 | 0.495602  |
| 6                                                                 | 3.416719  | 1.765717  | 0.065248  |
| 6                                                                 | -5.045386 | -1.778281 | -0.063318 |
| 6                                                                 | 5.848532  | -2.764229 | 0.027856  |
| 6                                                                 | -4.106060 | -1.033437 | -0.597612 |
| 6                                                                 | 4.742986  | -0.444039 | 0.125662  |
| 8                                                                 | -3.069097 | 1.215687  | 0.073778  |
| 6                                                                 | 5.333537  | -1.604079 | 0.093144  |
| 6                                                                 | -3.323574 | 0.158256  | -0.601249 |
| 6                                                                 | 2.643558  | 2.755281  | 0.008734  |
| 6                                                                 | -3.096543 | -0.718325 | -1.665842 |
| 12                                                                | -1.826746 | 2.579812  | 0.426663  |
| 12                                                                | 0.783869  | 3.553246  | 0.036155  |
| 16                                                                |           |           |           |
| 151.395412 Kcal/mol 6.565135 eV -101.142416 H Original3D_0_47.log |           |           |           |
| 6                                                                 | -0.131105 | 0.666224  | -1.496684 |
| 6                                                                 | -0.078255 | -0.583118 | -1.212597 |
| 6                                                                 | -0.307283 | 1.743784  | -0.682615 |
| 6                                                                 | 0.611905  | 1.731292  | 0.528270  |
| 8                                                                 | -0.343233 | -1.687009 | -0.755268 |
| 6                                                                 | -0.619336 | -0.097397 | 1.983885  |
| 6                                                                 | -0.046286 | 0.888200  | 1.471990  |
| 12                                                                | -2.446572 | 1.639130  | -0.712938 |
| 6                                                                 | -3.595639 | -1.170351 | 0.120930  |
| 8                                                                 | 2.913694  | -3.148759 | -0.349023 |
| 6                                                                 | 1.922745  | 1.889039  | 0.477794  |
| 12                                                                | -1.801393 | -1.537497 | 1.028774  |
| 6                                                                 | 3.224388  | -2.044304 | -0.257359 |
| 6                                                                 | 3.204009  | 1.802919  | 0.311423  |
| 6                                                                 | 4.405897  | 1.439253  | -0.047310 |
| 6                                                                 | -3.522390 | -0.021117 | -0.357012 |
| 16                                                                |           |           |           |
| 151.423290 Kcal/mol 6.566344 eV -101.142372 H Child_7_52.log      |           |           |           |
| 6                                                                 | 0.588247  | -2.422765 | 0.253161  |
| 6                                                                 | -4.134986 | 0.004580  | -2.547744 |
| 6                                                                 | 1.734733  | -2.249455 | -0.260705 |
| 6                                                                 | -3.287925 | 0.532518  | -1.666540 |
| 12                                                                | -1.189189 | -1.679348 | 1.063367  |
| 8                                                                 | -2.436554 | 1.218545  | -1.084679 |
| 6                                                                 | 2.839981  | -1.757432 | -0.725730 |
| 6                                                                 | 1.598496  | 1.919971  | 0.725337  |
| 6                                                                 | -0.316275 | 0.606693  | 1.968708  |
| 6                                                                 | 2.666655  | 2.047625  | 0.113509  |
| 6                                                                 | 3.704678  | -0.943164 | -1.074752 |
| 12                                                                | -2.082176 | 0.939912  | 0.795497  |
| 6                                                                 | 3.740959  | 1.512042  | -0.501496 |
| 6                                                                 | 0.478377  | 1.318352  | 1.283874  |
| 6                                                                 | 4.049186  | 0.397193  | -0.929333 |
| 8                                                                 | -2.902993 | -0.834011 | 0.817666  |
| 16                                                                |           |           |           |
| 151.448254 Kcal/mol 6.567426 eV -101.142332 H Child_18_31.log     |           |           |           |
| 8                                                                 | 2.803983  | -2.736619 | 0.376828  |
| 8                                                                 | -2.568371 | 2.013858  | -0.187951 |

|                                                              |            |           |           |
|--------------------------------------------------------------|------------|-----------|-----------|
| 6                                                            | 1.759181   | -2.060510 | 0.283437  |
| 6                                                            | -2.851276  | 0.740003  | -0.305351 |
| 6                                                            | 0.428632   | -2.655493 | 0.269720  |
| 6                                                            | -2.870997  | -0.515814 | -0.329397 |
| 6                                                            | 4.350232   | 2.099039  | -0.764606 |
| 6                                                            | -0.260370  | 4.611444  | 0.672375  |
| 6                                                            | -0.767025  | -2.958287 | 0.158614  |
| 6                                                            | -0.718243  | 3.443232  | 0.347958  |
| 6                                                            | 3.473787   | 1.190974  | -0.449419 |
| 6                                                            | 2.608304   | 0.266667  | -0.130626 |
| 6                                                            | -1.098394  | 2.189242  | 0.151205  |
| 6                                                            | 1.682247   | -0.608488 | 0.101354  |
| 12                                                           | -2.685986  | -2.507229 | -0.255685 |
| 12                                                           | -0.339128  | 0.118065  | 0.127134  |
| 16                                                           |            |           |           |
| 151.761490 Kcal/mol 6.581009 eV -101.141833 H Child_1_32.log |            |           |           |
| 8                                                            | 4.754682   | -1.305558 | 1.477320  |
| 6                                                            | -0.271883  | 3.160892  | -0.516700 |
| 6                                                            | 5.854874   | -1.078760 | 1.251188  |
| 12                                                           | -1.768976  | 2.605744  | 0.723910  |
| 6                                                            | 0.299942   | -1.599270 | -1.224331 |
| 6                                                            | 0.682361   | 2.493395  | -0.938829 |
| 6                                                            | -0.479532  | -2.553368 | -1.402436 |
| 8                                                            | 1.723354   | 1.784989  | -1.415335 |
| 6                                                            | 0.152107   | 0.126976  | 0.303469  |
| 6                                                            | -2.108857  | 0.611509  | 1.354214  |
| 6                                                            | -3.512098  | -1.532743 | 0.699905  |
| 6                                                            | -0.819230  | 0.292514  | 1.098921  |
| 6                                                            | 0.806975   | -0.326328 | -0.795852 |
| 6                                                            | 1.876325   | 0.395868  | -1.489399 |
| 6                                                            | -2.979378  | -0.489709 | 1.149563  |
| 12                                                           | -2.300518  | -2.675853 | -0.510090 |
| 16                                                           |            |           |           |
| 151.879718 Kcal/mol 6.586136 eV -101.141645 H Child_1_36.log |            |           |           |
| 6                                                            | -3.515400  | -0.514209 | 1.285306  |
| 6                                                            | 4.344571   | 0.042946  | 0.211340  |
| 6                                                            | -3.077873  | 0.597875  | 0.835805  |
| 6                                                            | 3.280566   | -0.560771 | -0.276981 |
| 6                                                            | -2.468197  | 1.714473  | 0.324090  |
| 6                                                            | 2.039253   | -0.972139 | -0.558556 |
| 6                                                            | -1.604168  | 2.438806  | -0.224660 |
| 12                                                           | 2.588126   | 0.896154  | 1.395061  |
| 12                                                           | -2.022848  | -1.471788 | 0.281965  |
| 6                                                            | 1.046106   | -1.357107 | -1.418919 |
| 6                                                            | -0.566879  | 3.024076  | -0.808616 |
| 6                                                            | 1.049318   | -0.811232 | 0.966296  |
| 6                                                            | 0.399558   | 3.525434  | -1.475119 |
| 6                                                            | -0.186627  | -1.564014 | -1.594541 |
| 8                                                            | -0.000001  | -1.436899 | 1.076589  |
| 8                                                            | -1.403087  | -1.872753 | -1.541211 |
| 16                                                           |            |           |           |
| 151.975308 Kcal/mol 6.590281 eV -101.141492 H Child_6_40.log |            |           |           |
| 6                                                            | -11.904397 | -3.104127 | 0.525925  |
| 12                                                           | 0.670839   | 2.749399  | 0.185580  |
| 6                                                            | 4.267423   | -1.877809 | -0.115522 |

|                                                              |            |           |           |
|--------------------------------------------------------------|------------|-----------|-----------|
| 6                                                            | 1.063606   | 0.426651  | -0.202921 |
| 8                                                            | 4.013179   | -4.259741 | 0.733951  |
| 6                                                            | 2.139250   | -0.355361 | -0.181148 |
| 6                                                            | 6.916169   | -1.484722 | -0.282662 |
| 6                                                            | -1.621232  | 3.431398  | -0.641663 |
| 6                                                            | 4.080827   | -3.183780 | 0.318662  |
| 6                                                            | -0.266133  | 0.368877  | -0.311350 |
| 6                                                            | 5.638851   | -1.621751 | -0.243482 |
| 6                                                            | -1.752633  | 2.173600  | -0.636404 |
| 6                                                            | -1.418756  | 0.878631  | -0.483968 |
| 6                                                            | 3.148724   | -1.089192 | -0.186815 |
| 8                                                            | -11.118441 | -3.219442 | -0.302595 |
| 12                                                           | -1.079847  | 4.955515  | 0.747523  |
| 16                                                           |            |           |           |
| 152.089414 Kcal/mol 6.595230 eV -101.141311 H MutI_9_75.log  |            |           |           |
| 6                                                            | -2.765792  | -1.552928 | -0.132112 |
| 12                                                           | 2.739501   | -2.549509 | -0.205471 |
| 6                                                            | 3.075169   | 0.252582  | -0.041364 |
| 6                                                            | -1.637399  | -2.121911 | -0.077125 |
| 8                                                            | -4.919410  | -0.339578 | -0.252758 |
| 6                                                            | 1.264394   | 0.891984  | 1.933382  |
| 6                                                            | -0.431296  | -2.646201 | -0.036550 |
| 8                                                            | -2.625308  | 1.939683  | 0.264660  |
| 6                                                            | 3.728893   | -0.825229 | -0.186743 |
| 6                                                            | -3.880692  | -0.906166 | -0.195278 |
| 6                                                            | 2.232483   | 1.318130  | 0.010737  |
| 6                                                            | 0.940030   | 1.415926  | 0.735649  |
| 6                                                            | -0.148274  | 2.143492  | 0.111254  |
| 12                                                           | 1.431116   | 2.990035  | -1.005619 |
| 6                                                            | -1.430688  | 2.033512  | 0.241633  |
| 6                                                            | 0.771562   | -3.017715 | 0.042830  |
| 16                                                           |            |           |           |
| 152.284096 Kcal/mol 6.603672 eV -101.141000 H Child_8_18.log |            |           |           |
| 8                                                            | -6.098889  | 1.823767  | 1.023207  |
| 6                                                            | 4.231365   | 2.462385  | -0.300064 |
| 8                                                            | -5.907281  | -0.447753 | -1.435677 |
| 12                                                           | 5.518134   | 0.873704  | -0.420283 |
| 6                                                            | -5.135018  | 0.013346  | -0.496052 |
| 6                                                            | 5.057385   | -1.113748 | -0.129612 |
| 6                                                            | -3.829193  | -0.442787 | -0.171760 |
| 6                                                            | 3.902057   | -1.514696 | 0.131733  |
| 6                                                            | -5.584222  | 1.086178  | 0.265198  |
| 6                                                            | -2.695322  | -0.848393 | 0.113226  |
| 6                                                            | 2.545863   | -1.434913 | 0.353293  |
| 12                                                           | -0.835527  | -1.531239 | 0.371835  |
| 6                                                            | 1.215393   | -1.567573 | 0.340618  |
| 6                                                            | 3.117616   | 1.905859  | -0.046703 |
| 6                                                            | 2.080187   | 1.081828  | 0.225227  |
| 6                                                            | 1.736901   | -0.147101 | 0.361752  |
| 16                                                           |            |           |           |
| 152.438243 Kcal/mol 6.610356 eV -101.140755 H MutI_17_55.log |            |           |           |
| 6                                                            | -1.287682  | -0.062679 | 0.510218  |
| 12                                                           | -1.112885  | -2.136847 | -0.062870 |
| 6                                                            | -0.611876  | 1.103192  | 0.806608  |
| 6                                                            | -3.166579  | -1.107558 | -0.538498 |

|    |                                                               |           |           |
|----|---------------------------------------------------------------|-----------|-----------|
| 6  | 3.462004                                                      | -0.843362 | -0.203757 |
| 6  | -3.106082                                                     | -2.327850 | -0.846235 |
| 6  | -3.063705                                                     | 1.455793  | -0.126323 |
| 6  | 0.953087                                                      | -2.854977 | 0.388281  |
| 8  | 1.302485                                                      | 2.248942  | -0.360918 |
| 6  | -2.641802                                                     | 0.114089  | -0.027382 |
| 6  | 0.260838                                                      | 2.111002  | 0.338890  |
| 12 | 2.975133                                                      | 1.310161  | -0.584070 |
| 6  | -1.077805                                                     | 2.480444  | 0.559792  |
| 8  | 2.070082                                                      | -2.914392 | 0.618158  |
| 6  | 4.441633                                                      | -0.020368 | -0.047374 |
| 6  | -2.383283                                                     | 2.492913  | 0.136674  |
| 16 | 152.681511 Kcal/mol 6.620905 eV -101.140367 H MutD_18_54.log  |           |           |
| 6  | 7.247256                                                      | -0.545874 | -0.617714 |
| 12 | -1.794573                                                     | -1.763506 | 0.258022  |
| 6  | -3.050681                                                     | 1.907475  | -0.243531 |
| 6  | -4.000522                                                     | -1.540858 | -0.327849 |
| 6  | 6.002346                                                      | -0.423873 | -0.337175 |
| 6  | -2.138203                                                     | 2.721185  | -0.085623 |
| 6  | -3.357270                                                     | -0.338262 | -0.191967 |
| 8  | 0.000585                                                      | -1.414223 | 0.500056  |
| 8  | -3.902320                                                     | 0.873981  | -0.435435 |
| 6  | 2.177116                                                      | 0.023129  | 0.283599  |
| 6  | 0.852128                                                      | -0.440135 | 0.432264  |
| 6  | 4.715888                                                      | -0.290390 | -0.101864 |
| 6  | 1.038078                                                      | 0.928082  | 0.371631  |
| 12 | -0.139911                                                     | 2.607187  | 0.198932  |
| 6  | -3.901781                                                     | -2.823878 | -0.281123 |
| 6  | 3.486927                                                      | -0.143642 | 0.099281  |
| 16 | 153.007071 Kcal/mol 6.635023 eV -101.139848 H Child_15_17.log |           |           |
| 8  | 7.255625                                                      | 1.785336  | -0.556640 |
| 6  | -5.636442                                                     | 1.232647  | -0.701742 |
| 6  | 6.213096                                                      | 1.211967  | -0.334598 |
| 6  | -5.056586                                                     | 0.120230  | -0.851970 |
| 6  | 5.379130                                                      | 0.208615  | -0.186934 |
| 6  | -4.101716                                                     | -0.843652 | -0.878780 |
| 8  | 4.140384                                                      | -0.041405 | 0.056844  |
| 12 | 2.548548                                                      | -0.857464 | 0.391891  |
| 6  | -2.979219                                                     | -1.242991 | -0.527363 |
| 6  | 0.034535                                                      | -3.032028 | 0.197690  |
| 6  | -2.316486                                                     | 1.497010  | 0.967245  |
| 6  | 0.754314                                                      | -1.781141 | 0.349656  |
| 6  | -1.756226                                                     | -0.940381 | 0.107649  |
| 6  | -0.618440                                                     | -1.741734 | 0.187507  |
| 6  | -1.861936                                                     | 0.377411  | 0.640383  |
| 12 | -4.172899                                                     | 2.161866  | 0.456934  |
| 16 | 153.099198 Kcal/mol 6.639018 eV -101.139701 H Child_17_15.log |           |           |
| 6  | 1.998712                                                      | 2.745046  | -0.139887 |
| 6  | -7.319894                                                     | -0.343863 | -0.386620 |
| 6  | 2.967198                                                      | 1.988476  | -0.242697 |
| 6  | -6.046833                                                     | -0.395314 | -0.248368 |
| 12 | 0.026638                                                      | 2.526793  | 0.234513  |

|                                                              |           |           |           |
|--------------------------------------------------------------|-----------|-----------|-----------|
| 6                                                            | -4.743613 | -0.347659 | -0.061856 |
| 8                                                            | 3.892307  | 1.006377  | -0.269906 |
| 6                                                            | -3.501453 | -0.301000 | 0.107535  |
| 6                                                            | -1.062054 | 0.785631  | 0.362872  |
| 8                                                            | 0.039777  | -1.523303 | 0.188268  |
| 6                                                            | 3.377276  | -0.243439 | -0.177945 |
| 6                                                            | -2.184696 | -0.135662 | 0.242422  |
| 6                                                            | 4.206671  | -2.658778 | 0.072059  |
| 6                                                            | -0.842277 | -0.576066 | 0.272266  |
| 6                                                            | 4.135143  | -1.377851 | -0.057618 |
| 12                                                           | 1.859883  | -1.751936 | -0.051168 |
| 16                                                           |           |           |           |
| 153.192194 Kcal/mol 6.643051 eV -101.139553 H MutD_2_72.log  |           |           |           |
| 6                                                            | -2.314479 | -1.002869 | -0.662837 |
| 6                                                            | -0.250282 | -0.595794 | -0.181107 |
| 12                                                           | 4.875678  | 1.676729  | -1.521837 |
| 6                                                            | -2.152745 | 2.401665  | 0.500320  |
| 6                                                            | 1.019928  | -0.127654 | -0.547059 |
| 6                                                            | -3.697949 | -0.558208 | -0.670404 |
| 6                                                            | -1.081488 | -1.818423 | -0.804675 |
| 6                                                            | -3.822913 | 0.605801  | -0.206309 |
| 6                                                            | 3.056441  | -0.971720 | 2.063684  |
| 8                                                            | -0.741519 | -2.932448 | -1.159040 |
| 6                                                            | 2.869858  | -0.428035 | 0.922122  |
| 6                                                            | -2.512147 | 1.181848  | 0.100172  |
| 6                                                            | -1.577997 | 0.073111  | -0.178082 |
| 8                                                            | -1.784304 | 3.458724  | 0.830699  |
| 12                                                           | 0.924180  | -1.399156 | 1.688504  |
| 6                                                            | 2.231822  | -0.016570 | -0.231371 |
| 16                                                           |           |           |           |
| 153.484678 Kcal/mol 6.655734 eV -101.139087 H Child_7_30.log |           |           |           |
| 6                                                            | -2.117839 | 2.002195  | 0.556424  |
| 12                                                           | -0.850248 | 0.069306  | -0.240538 |
| 12                                                           | -0.222592 | 2.868377  | 0.512524  |
| 8                                                            | -2.265324 | -1.198390 | -0.518091 |
| 6                                                            | -3.156209 | 1.274393  | 0.404864  |
| 6                                                            | 4.317696  | 0.165395  | -1.584683 |
| 6                                                            | -3.976107 | 0.347508  | -0.128064 |
| 6                                                            | 2.083498  | 0.780883  | -0.333596 |
| 6                                                            | -3.551365 | -1.016099 | -0.225889 |
| 6                                                            | 4.445660  | -0.528060 | -0.247386 |
| 6                                                            | -4.468665 | -1.990955 | 0.049543  |
| 6                                                            | 3.284617  | 0.239858  | -0.581421 |
| 6                                                            | -5.428746 | -2.818447 | 0.285141  |
| 6                                                            | 5.128882  | -1.317982 | 0.508597  |
| 6                                                            | 0.907492  | 1.281008  | -0.159233 |
| 8                                                            | 5.772900  | -2.022905 | 1.201891  |
| 16                                                           |           |           |           |
| 153.530022 Kcal/mol 6.657700 eV -101.139015 H MutD_10_68.log |           |           |           |
| 6                                                            | -3.022781 | 1.043113  | -1.018178 |
| 12                                                           | -7.068504 | -1.397140 | -0.268842 |
| 6                                                            | -0.292353 | 2.023535  | 0.564136  |
| 6                                                            | -0.441525 | -1.231749 | 1.095156  |
| 12                                                           | -2.091311 | 1.165551  | 1.050832  |
| 6                                                            | 3.319712  | 0.721297  | -0.170542 |

|                                                               |           |           |           |
|---------------------------------------------------------------|-----------|-----------|-----------|
| 6                                                             | 0.852004  | -1.396150 | 0.740184  |
| 6                                                             | -1.599173 | -0.814413 | 1.325967  |
| 6                                                             | 3.258478  | -0.799989 | -0.102823 |
| 6                                                             | 2.015267  | -1.282716 | 0.351887  |
| 8                                                             | -3.233518 | 0.714571  | -2.095552 |
| 6                                                             | 0.955595  | 1.851281  | 0.341422  |
| 6                                                             | 4.304579  | -1.550381 | -0.486357 |
| 6                                                             | 5.347009  | -2.191128 | -0.903348 |
| 8                                                             | 4.355874  | 1.358519  | -0.508296 |
| 6                                                             | 2.126344  | 1.326357  | 0.170313  |
| 16                                                            |           |           |           |
| 153.835638 Kcal/mol 6.670953 eV -101.138528 H Child_7_25.log  |           |           |           |
| 6                                                             | -4.816080 | -0.476535 | -0.299757 |
| 6                                                             | 0.488241  | 3.199036  | 0.081028  |
| 6                                                             | -3.941191 | -1.364234 | -0.144312 |
| 6                                                             | 1.666213  | 2.833189  | 0.011791  |
| 8                                                             | -2.779121 | -2.078649 | -0.001733 |
| 6                                                             | 3.441479  | 1.016491  | -0.149835 |
| 6                                                             | -1.703310 | -1.260405 | 0.121680  |
| 6                                                             | 2.752284  | 2.039920  | -0.086032 |
| 12                                                            | -3.046765 | 0.846742  | -0.013688 |
| 6                                                             | 3.783224  | -0.315528 | -0.142298 |
| 12                                                            | 0.235227  | -2.202863 | 0.192193  |
| 6                                                             | -2.002742 | 2.596580  | 0.133430  |
| 6                                                             | -0.864902 | 3.090881  | 0.128132  |
| 6                                                             | 3.187695  | -1.531712 | -0.025326 |
| 6                                                             | 4.622970  | -1.517652 | -0.127276 |
| 8                                                             | 2.036016  | -2.119694 | 0.108056  |
| 16                                                            |           |           |           |
| 153.876742 Kcal/mol 6.672735 eV -101.138462 H Child_4_25.log  |           |           |           |
| 8                                                             | -3.861886 | 2.024152  | 0.300559  |
| 6                                                             | 2.782236  | 0.749561  | -0.119464 |
| 6                                                             | -4.844600 | -1.150052 | -1.262545 |
| 12                                                            | 3.996233  | -1.002461 | -0.537620 |
| 6                                                             | -4.343794 | -0.142959 | -0.634749 |
| 8                                                             | 2.439769  | -2.034879 | -0.118820 |
| 6                                                             | -3.583510 | 0.864457  | -0.001224 |
| 6                                                             | 1.423649  | -1.337111 | 0.289008  |
| 6                                                             | -2.238572 | 0.252114  | 0.251479  |
| 6                                                             | 0.241305  | -1.903267 | 0.702931  |
| 6                                                             | -0.971447 | 0.857848  | 0.130473  |
| 6                                                             | -1.006549 | -1.718791 | 0.688024  |
| 6                                                             | -2.172350 | -1.096925 | 0.564268  |
| 6                                                             | 1.577315  | 0.223432  | 0.192770  |
| 6                                                             | 0.274288  | 0.820855  | 0.225142  |
| 12                                                            | 3.382860  | 2.800032  | -0.096596 |
| 16                                                            |           |           |           |
| 154.055807 Kcal/mol 6.680500 eV -101.138177 H Child_11_12.log |           |           |           |
| 6                                                             | 1.461233  | 0.946367  | 1.424481  |
| 6                                                             | 4.985456  | -2.533921 | 0.563260  |
| 6                                                             | 0.129443  | 0.855377  | 1.506625  |
| 6                                                             | 4.646313  | 0.242571  | -2.267438 |
| 6                                                             | -1.093935 | 0.707308  | 1.374960  |
| 6                                                             | 5.679656  | 0.912497  | -1.929932 |
| 6                                                             | 2.651414  | 0.956036  | 1.044503  |



|                                                                   |           |           |           |
|-------------------------------------------------------------------|-----------|-----------|-----------|
| 8                                                                 | -4.692996 | -1.712356 | -0.722918 |
| 6                                                                 | -2.321506 | 0.360515  | 0.864921  |
| 6                                                                 | -3.747974 | -1.579942 | 0.156924  |
| 6                                                                 | -3.237354 | 1.258608  | 0.199327  |
| 8                                                                 | 4.644951  | -1.443329 | 0.488097  |
| 6                                                                 | -2.839811 | -0.942237 | 0.720449  |
| 6                                                                 | -4.226298 | 1.647491  | -0.469146 |
| 12                                                                | 4.267209  | 0.620040  | -0.223941 |
| 12                                                                | -5.278498 | 0.068415  | -1.213978 |
| 16                                                                |           |           |           |
| 155.244507 Kcal/mol 6.732047 eV -101.136283 H Child_15_11.log     |           |           |           |
| 6                                                                 | 0.961135  | -1.677182 | -0.390490 |
| 6                                                                 | -0.767391 | 1.548458  | -0.147944 |
| 6                                                                 | -1.550549 | -2.065231 | -0.788495 |
| 8                                                                 | 1.612475  | 1.733476  | 0.505039  |
| 6                                                                 | 2.235710  | -1.368666 | -0.197454 |
| 6                                                                 | -1.975952 | 1.611857  | -0.571238 |
| 12                                                                | 5.497353  | -0.571766 | 0.049735  |
| 6                                                                 | -3.187746 | 1.744108  | -0.962315 |
| 6                                                                 | 3.422552  | -0.955217 | -0.003065 |
| 6                                                                 | 0.444487  | 1.602441  | 0.191700  |
| 6                                                                 | -0.255154 | -1.901457 | -0.593176 |
| 6                                                                 | -4.391755 | 1.902349  | -1.458418 |
| 6                                                                 | -2.823817 | -2.146070 | -0.929948 |
| 12                                                                | 3.531068  | 1.182185  | 0.638335  |
| 8                                                                 | -5.701131 | -1.036040 | 1.663591  |
| 6                                                                 | -4.716820 | -0.446140 | 1.583198  |
| 16                                                                |           |           |           |
| 155.401627 Kcal/mol 6.738861 eV -101.136032 H Child_4_41.log      |           |           |           |
| 6                                                                 | -2.522326 | -3.648106 | -1.413157 |
| 6                                                                 | 2.186286  | -0.645497 | 0.719356  |
| 8                                                                 | -2.114607 | -3.236448 | -0.417385 |
| 8                                                                 | 2.650544  | 1.608615  | -1.678080 |
| 6                                                                 | -3.119290 | 1.342088  | 0.767327  |
| 6                                                                 | 3.314467  | 2.559226  | -1.588908 |
| 12                                                                | -1.603587 | 1.241393  | 2.159564  |
| 12                                                                | 1.355413  | -0.108302 | -1.185536 |
| 6                                                                 | -4.182047 | 1.207023  | -0.217298 |
| 6                                                                 | 1.262702  | -0.023371 | 1.577291  |
| 6                                                                 | -2.781515 | 1.019915  | -0.535886 |
| 6                                                                 | 3.247554  | -1.390807 | 1.074239  |
| 6                                                                 | 0.301286  | 0.554125  | 2.124907  |
| 6                                                                 | -1.662841 | 0.685066  | -1.276462 |
| 6                                                                 | 4.296066  | -2.100878 | 1.350979  |
| 6                                                                 | -0.558579 | 0.345478  | -1.736489 |
| 16                                                                |           |           |           |
| 155.504855 Kcal/mol 6.743337 eV -101.135868 H Original3D_0_51.log |           |           |           |
| 6                                                                 | 1.051690  | -2.296015 | -0.668181 |
| 12                                                                | 2.909543  | 0.005995  | -0.060739 |
| 6                                                                 | 0.520725  | 1.414390  | -0.008127 |
| 6                                                                 | 0.148217  | 0.037619  | -0.167763 |
| 6                                                                 | 2.464147  | 2.995789  | 0.070617  |
| 6                                                                 | 1.213397  | -4.687240 | -1.645236 |
| 6                                                                 | 1.089535  | -3.525913 | -1.116954 |
| 8                                                                 | -1.188201 | -2.189218 | 2.633043  |

|                                                               |           |           |           |
|---------------------------------------------------------------|-----------|-----------|-----------|
| 6                                                             | 1.817661  | 1.849204  | 0.028553  |
| 6                                                             | -2.459201 | 0.050644  | -0.349601 |
| 6                                                             | 1.104516  | -1.074477 | -0.274123 |
| 6                                                             | -1.194626 | -0.090632 | -0.229587 |
| 8                                                             | 3.179323  | 3.940879  | 0.099718  |
| 6                                                             | -0.893582 | -1.126179 | 2.967687  |
| 6                                                             | -3.743545 | 0.129919  | -0.543201 |
| 12                                                            | -4.796425 | 1.987676  | -0.793143 |
| 16                                                            |           |           |           |
| 155.737904 Kcal/mol 6.753443 eV -101.135496 H Child_10_19.log |           |           |           |
| 8                                                             | 3.796270  | -1.691475 | 0.209323  |
| 6                                                             | -0.611092 | 3.396426  | -0.006152 |
| 6                                                             | 1.017176  | -3.904831 | -0.164488 |
| 6                                                             | -1.699929 | 2.807400  | 0.015119  |
| 6                                                             | 1.409339  | -2.532206 | -0.043459 |
| 6                                                             | 0.728076  | 3.579993  | -0.027029 |
| 6                                                             | 2.438407  | -1.553204 | 0.030156  |
| 6                                                             | -2.727987 | 1.952555  | 0.028574  |
| 6                                                             | 0.066575  | -2.767638 | -0.055161 |
| 6                                                             | 1.976570  | 3.522006  | -0.048964 |
| 6                                                             | 2.601494  | -0.244578 | -0.027371 |
| 6                                                             | -3.386023 | 0.894280  | 0.041555  |
| 12                                                            | -1.904878 | -2.173639 | 0.008037  |
| 6                                                             | -4.218312 | -0.218459 | 0.014918  |
| 12                                                            | 2.971486  | 1.763087  | -0.043340 |
| 8                                                             | -3.591902 | -1.391507 | 0.025359  |
| 16                                                            |           |           |           |
| 155.880275 Kcal/mol 6.759617 eV -101.135269 H MutI_9_71.log   |           |           |           |
| 6                                                             | 1.522797  | -2.669449 | -0.037043 |
| 12                                                            | -2.833160 | -2.526791 | 0.185877  |
| 6                                                             | -0.991460 | -3.274222 | -0.262478 |
| 8                                                             | 4.494581  | -0.238125 | -0.081812 |
| 6                                                             | -0.341474 | 2.790480  | -0.000806 |
| 12                                                            | 3.164834  | -1.538293 | 0.119616  |
| 6                                                             | -3.964137 | -0.845935 | 0.137063  |
| 6                                                             | 0.887219  | 2.668562  | 0.066083  |
| 6                                                             | 0.265438  | -2.931217 | -0.216741 |
| 6                                                             | -2.856958 | 2.318050  | -0.101574 |
| 6                                                             | 3.257534  | 1.695223  | 0.096783  |
| 8                                                             | -4.048230 | 1.725492  | -0.125912 |
| 6                                                             | -4.048058 | 0.377488  | 0.025053  |
| 6                                                             | -1.672655 | 2.607830  | -0.052320 |
| 6                                                             | 4.507408  | 1.097507  | -0.074067 |
| 6                                                             | 2.175864  | 2.312693  | 0.086026  |
| 16                                                            |           |           |           |
| 156.057605 Kcal/mol 6.767307 eV -101.134987 H Child_14_19.log |           |           |           |
| 6                                                             | -5.963244 | -1.737974 | 0.261797  |
| 6                                                             | 5.126346  | 0.312732  | 0.043501  |
| 6                                                             | -6.702964 | -0.646951 | -0.158431 |
| 12                                                            | 4.681418  | -1.620937 | 0.252550  |
| 6                                                             | -5.323399 | -0.464753 | 0.146707  |
| 6                                                             | 2.727048  | -2.247390 | 0.062653  |
| 6                                                             | -4.211716 | 0.300679  | 0.204143  |
| 6                                                             | 4.068587  | 0.989383  | 0.019866  |
| 6                                                             | -3.178220 | 0.994176  | 0.233808  |

|                                                                  |           |           |           |
|------------------------------------------------------------------|-----------|-----------|-----------|
| 6                                                                | 1.544581  | -1.807594 | -0.095427 |
| 12                                                               | -1.211071 | 1.376445  | -0.039002 |
| 6                                                                | 2.880918  | 1.641670  | -0.005826 |
| 8                                                                | 0.451177  | 2.244879  | 0.045818  |
| 8                                                                | -0.504277 | -0.445734 | -0.518207 |
| 6                                                                | 0.481125  | -1.169617 | -0.495792 |
| 6                                                                | 1.681045  | 1.925764  | -0.014244 |
| 16                                                               |           |           |           |
| 156.107099 Kcal/mol 6.769453 eV -101.134908 H Original3D_1_4.log |           |           |           |
| 6                                                                | -0.858859 | -1.339916 | -0.803713 |
| 8                                                                | 1.476640  | -1.620798 | -1.787888 |
| 6                                                                | 0.387270  | 1.817424  | -0.082397 |
| 6                                                                | 3.928035  | 2.124440  | 0.699656  |
| 6                                                                | -1.858215 | -1.420912 | 0.069524  |
| 6                                                                | 2.494045  | -1.213839 | -0.936262 |
| 6                                                                | -3.005945 | -0.611429 | 0.071414  |
| 12                                                               | -2.755159 | 1.940482  | -0.316550 |
| 6                                                                | 1.430768  | -0.417987 | -0.050119 |
| 6                                                                | 0.387187  | -0.996985 | -1.043372 |
| 6                                                                | 2.782725  | 1.630409  | 0.361126  |
| 6                                                                | -3.866692 | 0.297972  | 0.147710  |
| 6                                                                | 1.589514  | 1.090606  | 0.055827  |
| 6                                                                | -0.750918 | 2.290383  | -0.217600 |
| 8                                                                | 1.241247  | -0.968027 | 1.230701  |
| 12                                                               | -0.386223 | -1.839681 | 1.552111  |
| 16                                                               |           |           |           |
| 156.149837 Kcal/mol 6.771306 eV -101.134840 H Child_8_29.log     |           |           |           |
| 8                                                                | 4.385876  | 0.493380  | 0.502028  |
| 8                                                                | -8.592026 | -0.262218 | -0.379518 |
| 6                                                                | 3.866686  | 1.698863  | 0.784586  |
| 6                                                                | -8.865021 | 0.700836  | 0.186520  |
| 6                                                                | 2.500159  | 1.874699  | 0.480840  |
| 6                                                                | 1.883134  | -2.328742 | 0.548569  |
| 6                                                                | 3.582706  | -0.594872 | -0.018574 |
| 12                                                               | 2.939380  | -0.149074 | -2.142331 |
| 6                                                                | 1.306762  | 2.224112  | 0.353621  |
| 6                                                                | 0.678532  | -2.646294 | 0.444991  |
| 6                                                                | 2.972757  | -1.556038 | 0.572892  |
| 6                                                                | -0.630512 | -2.357997 | 0.359418  |
| 6                                                                | -1.615372 | -1.617517 | 0.232622  |
| 12                                                               | -0.725838 | 2.069519  | 0.092788  |
| 6                                                                | -2.169226 | -0.390142 | 0.056579  |
| 6                                                                | -2.329488 | 0.843987  | -0.066324 |
| 16                                                               |           |           |           |
| 156.702247 Kcal/mol 6.795261 eV -101.133959 H MutI_13_35.log     |           |           |           |
| 12                                                               | -0.278676 | 1.970346  | 0.171238  |
| 6                                                                | 1.682946  | 1.584941  | 0.771735  |
| 6                                                                | -3.882795 | -1.140313 | 0.790217  |
| 6                                                                | -1.232854 | 0.438728  | -1.052502 |
| 8                                                                | -0.036132 | -0.118398 | -3.164024 |
| 6                                                                | 2.649944  | -4.444525 | -0.372757 |
| 8                                                                | -2.183661 | 2.002362  | 0.429685  |
| 12                                                               | 3.621023  | 2.363856  | 0.430667  |
| 6                                                                | -0.680835 | 0.077997  | -2.158582 |
| 6                                                                | 2.332772  | -3.336487 | 0.184679  |

|                                                               |            |           |           |
|---------------------------------------------------------------|------------|-----------|-----------|
| 6                                                             | 1.779292   | -0.995950 | 1.062430  |
| 6                                                             | 1.654455   | 0.304800  | 0.959475  |
| 6                                                             | -3.110975  | -0.222407 | 0.358500  |
| 6                                                             | -2.249593  | 0.735996  | -0.113793 |
| 6                                                             | 2.050866   | -2.163066 | 0.666501  |
| 6                                                             | -4.718192  | -2.020070 | 1.346073  |
| 16                                                            |            |           |           |
| 156.741861 Kcal/mol 6.796979 eV -101.133896 H Child_5_42.log  |            |           |           |
| 6                                                             | 6.250520   | -1.283031 | 0.404598  |
| 8                                                             | -13.029054 | -0.118521 | -0.092137 |
| 6                                                             | 5.496283   | -0.043681 | 0.339284  |
| 6                                                             | -13.475918 | -0.055108 | 0.964246  |
| 6                                                             | 5.038384   | 1.257823  | 0.305260  |
| 6                                                             | -2.549778  | -0.646835 | -0.536933 |
| 6                                                             | 4.795163   | -1.217076 | 0.247668  |
| 6                                                             | -1.325902  | -0.901468 | -0.412745 |
| 6                                                             | 4.281703   | 2.256193  | 0.233285  |
| 6                                                             | 0.042569   | -0.475622 | -0.260110 |
| 6                                                             | 3.466972   | -1.513981 | 0.098641  |
| 12                                                            | -1.654240  | 1.303960  | -0.408547 |
| 6                                                             | 2.243188   | -1.472629 | -0.036520 |
| 8                                                             | 0.970032   | -1.656101 | -0.179589 |
| 12                                                            | 2.351591   | 1.517232  | 0.015787  |
| 6                                                             | 0.420809   | 0.819196  | -0.198855 |
| 16                                                            |            |           |           |
| 156.773584 Kcal/mol 6.798355 eV -101.133846 H Child_13_18.log |            |           |           |
| 6                                                             | 6.381119   | -1.949532 | -0.008319 |
| 8                                                             | -6.950488  | -1.239724 | -0.000456 |
| 6                                                             | 5.169653   | -1.499399 | -0.004473 |
| 8                                                             | -1.757929  | 1.592479  | -0.000799 |
| 6                                                             | 3.952391   | -0.935307 | -0.000378 |
| 6                                                             | -5.817982  | -0.886499 | -0.001090 |
| 6                                                             | -4.591795  | -0.504631 | -0.000487 |
| 6                                                             | 2.662240   | -1.384521 | 0.001576  |
| 6                                                             | -3.382742  | -0.131254 | 0.003264  |
| 12                                                            | 3.413877   | 1.177642  | 0.005775  |
| 6                                                             | -2.093883  | 0.267108  | 0.002424  |
| 6                                                             | 1.409547   | -1.411145 | 0.003096  |
| 12                                                            | -0.012892  | 2.255522  | -0.015883 |
| 6                                                             | 0.115494   | -1.101975 | 0.004558  |
| 6                                                             | -1.050128  | -0.666407 | 0.004644  |
| 6                                                             | 2.055339   | 2.866892  | 0.017074  |
| 16                                                            |            |           |           |
| 156.846018 Kcal/mol 6.801496 eV -101.133730 H Child_9_17.log  |            |           |           |
| 6                                                             | 2.362757   | 2.752352  | -0.143012 |
| 6                                                             | -3.137337  | 0.195016  | 0.204294  |
| 6                                                             | 1.139489   | 2.945524  | -0.176709 |
| 6                                                             | -3.773419  | -2.407507 | -0.454542 |
| 12                                                            | 3.361097   | 1.011026  | 0.053345  |
| 6                                                             | -3.148653  | -1.165753 | -0.007829 |
| 6                                                             | -0.223795  | 3.059498  | -0.154932 |
| 6                                                             | -2.367664  | -2.280917 | -0.090065 |
| 6                                                             | 3.783050   | -1.136421 | 0.269047  |
| 8                                                             | 2.569954   | -0.743524 | -0.288440 |
| 12                                                            | 2.114243   | -2.604553 | 0.039894  |

|                                                                   |           |           |           |
|-------------------------------------------------------------------|-----------|-----------|-----------|
| 6                                                                 | -3.004496 | 1.399282  | 0.209477  |
| 6                                                                 | -1.416095 | 3.020259  | 0.004666  |
| 6                                                                 | -1.079400 | -2.763017 | 0.052749  |
| 6                                                                 | 0.114705  | -3.045501 | 0.228487  |
| 8                                                                 | -2.719819 | 2.704203  | 0.192358  |
| 16                                                                |           |           |           |
| 156.863122 Kcal/mol 6.802237 eV -101.133703 H MutD_6_76.log       |           |           |           |
| 6                                                                 | 4.081267  | -1.002173 | -0.878553 |
| 6                                                                 | 0.158116  | 2.093373  | 0.638321  |
| 6                                                                 | 1.533720  | 1.850162  | 0.576007  |
| 12                                                                | 2.181197  | -1.596612 | -0.351064 |
| 12                                                                | -1.949076 | 0.613984  | 0.594249  |
| 6                                                                 | 0.085339  | -1.681025 | -0.080748 |
| 8                                                                 | -5.243001 | 1.149096  | -1.318737 |
| 6                                                                 | 3.852249  | 1.454724  | -0.118917 |
| 6                                                                 | -3.024215 | -1.115733 | 1.085194  |
| 8                                                                 | -1.047717 | -2.517152 | 0.113150  |
| 6                                                                 | -0.177424 | -0.350194 | 0.091365  |
| 6                                                                 | 0.653662  | 0.763671  | 0.342523  |
| 6                                                                 | 4.217924  | 0.240325  | -0.615754 |
| 6                                                                 | 2.897896  | 2.069569  | 0.376234  |
| 6                                                                 | -2.166762 | -1.901685 | 0.593895  |
| 6                                                                 | -4.188389 | 1.368315  | -0.888486 |
| 16                                                                |           |           |           |
| 156.940404 Kcal/mol 6.805589 eV -101.133580 H Original3D_11_3.log |           |           |           |
| 8                                                                 | 3.522897  | 2.191654  | -0.113114 |
| 12                                                                | 1.901812  | 1.008080  | 0.596806  |
| 8                                                                 | -1.252660 | -2.675978 | -0.567157 |
| 6                                                                 | 3.856493  | -0.142830 | -0.844052 |
| 6                                                                 | -1.355390 | 0.572613  | 0.227568  |
| 6                                                                 | 3.915699  | 1.092113  | -0.643417 |
| 6                                                                 | -2.785829 | 0.364822  | 0.166575  |
| 6                                                                 | -2.245753 | -1.876886 | -0.551546 |
| 6                                                                 | 2.296176  | -1.493171 | 0.759970  |
| 6                                                                 | -3.018381 | -0.929654 | -0.358732 |
| 6                                                                 | -3.734101 | 1.053779  | 1.161157  |
| 6                                                                 | -3.734005 | 1.680068  | -0.104153 |
| 6                                                                 | 3.151856  | -1.051438 | -0.077090 |
| 12                                                                | 0.298610  | -1.865141 | 0.360672  |
| 6                                                                 | -0.113478 | 0.514904  | 0.294417  |
| 6                                                                 | -3.661111 | 2.575566  | -1.038626 |
| 16                                                                |           |           |           |
| 157.054433 Kcal/mol 6.810533 eV -101.133398 H Original3D_3_3.log  |           |           |           |
| 6                                                                 | -2.931317 | 1.771412  | -0.386506 |
| 8                                                                 | -0.268954 | 3.715460  | -0.167430 |
| 6                                                                 | -1.029141 | -0.117342 | -0.719677 |
| 12                                                                | 1.907498  | -0.608984 | -1.749233 |
| 6                                                                 | 3.285194  | -0.418596 | 0.546989  |
| 6                                                                 | -1.934158 | 0.898669  | -0.556478 |
| 8                                                                 | -2.562921 | -1.723906 | 0.391547  |
| 6                                                                 | -1.847081 | -0.616187 | 0.519496  |
| 6                                                                 | 3.670531  | -0.575263 | -0.649289 |
| 6                                                                 | 1.348417  | -0.168680 | 2.181096  |
| 6                                                                 | 0.331657  | 4.635841  | -0.494734 |
| 6                                                                 | -0.060091 | -0.805025 | -1.392582 |

|                                                              |           |           |           |
|--------------------------------------------------------------|-----------|-----------|-----------|
| 6                                                            | -0.000249 | -0.171380 | 2.225304  |
| 12                                                           | -1.116402 | -2.659664 | -0.697956 |
| 6                                                            | -1.114187 | -0.276123 | 1.697203  |
| 6                                                            | 2.474067  | -0.275435 | 1.624733  |
| 16                                                           |           |           |           |
| 157.095163 Kcal/mol 6.812300 eV -101.133333 H Child_7_48.log |           |           |           |
| 8                                                            | 5.024258  | -0.108308 | 0.463226  |
| 6                                                            | -6.298099 | -0.858883 | 0.030464  |
| 6                                                            | 3.834993  | 0.010096  | 0.164849  |
| 6                                                            | -5.051008 | -0.610900 | 0.008739  |
| 6                                                            | 3.014278  | 1.185072  | 0.145865  |
| 6                                                            | -3.716468 | -0.297608 | 0.077979  |
| 8                                                            | 3.422039  | -2.148642 | -0.850133 |
| 6                                                            | -2.588595 | -1.115745 | 0.291692  |
| 6                                                            | 2.938402  | -1.236758 | -0.185375 |
| 6                                                            | -3.031198 | 0.917457  | -0.130320 |
| 6                                                            | 1.994339  | 1.887052  | 0.053273  |
| 6                                                            | -1.276764 | -1.168503 | 0.178758  |
| 12                                                           | 0.017623  | 2.317086  | -0.205907 |
| 6                                                            | -1.826347 | 1.415775  | -0.356043 |
| 6                                                            | -0.945679 | 0.257832  | -0.043601 |
| 12                                                           | 0.827586  | -1.004895 | 0.345705  |
| 16                                                           |           |           |           |
| 157.130503 Kcal/mol 6.813832 eV -101.133277 H Child_7_51.log |           |           |           |
| 6                                                            | -6.427973 | 0.924502  | 1.394816  |
| 6                                                            | 5.582419  | 0.298742  | 1.787094  |
| 6                                                            | -5.316582 | 0.581969  | 0.844876  |
| 6                                                            | 4.493334  | -0.087836 | 1.189944  |
| 6                                                            | -2.209531 | -1.268287 | -0.365667 |
| 8                                                            | 2.341571  | 2.948353  | -0.734954 |
| 6                                                            | -4.186699 | 0.157728  | 0.340130  |
| 6                                                            | 3.410156  | -0.539599 | 0.629496  |
| 6                                                            | -1.260488 | -2.057808 | -0.560584 |
| 6                                                            | 1.708645  | 1.930997  | -0.727845 |
| 6                                                            | -3.033195 | -0.168254 | -0.141251 |
| 6                                                            | 2.366388  | -1.112021 | 0.097061  |
| 12                                                           | -1.194698 | 0.873804  | -0.528943 |
| 6                                                            | 0.880289  | 0.924309  | -0.649688 |
| 8                                                            | 1.338770  | -0.446870 | -0.731421 |
| 12                                                           | 0.737757  | -2.333682 | -0.412665 |
| 16                                                           |           |           |           |
| 157.348807 Kcal/mol 6.823299 eV -101.132929 H MutD_9_68.log  |           |           |           |
| 6                                                            | 1.422922  | 2.745854  | 0.815467  |
| 6                                                            | -1.326353 | -1.517544 | 1.110519  |
| 6                                                            | 1.199454  | -1.742266 | 0.494339  |
| 6                                                            | -3.188952 | 1.774469  | -1.618306 |
| 6                                                            | -2.451493 | -1.720013 | 2.024759  |
| 6                                                            | -2.954999 | 0.645929  | -0.891477 |
| 6                                                            | 0.000282  | -1.634739 | 0.798311  |
| 6                                                            | 0.281322  | 2.430041  | 0.353058  |
| 6                                                            | -0.839156 | 2.034407  | -0.150803 |
| 12                                                           | 3.105589  | -1.688581 | -0.216244 |
| 6                                                            | -2.570557 | -1.183366 | 0.684475  |
| 8                                                            | -4.129201 | -1.404818 | -1.074078 |
| 8                                                            | 2.509966  | 3.042510  | 1.246361  |

|                                                                  |           |           |           |
|------------------------------------------------------------------|-----------|-----------|-----------|
| 6                                                                | -3.308069 | -0.689595 | -0.469808 |
| 6                                                                | -1.939330 | 1.612725  | -0.678214 |
| 12                                                               | 5.811365  | -0.781166 | -1.134772 |
| 16                                                               |           |           |           |
| 157.367367 Kcal/mol 6.824104 eV -101.132900 H Child_3_52.log     |           |           |           |
| 6                                                                | -0.160294 | -1.700848 | -1.968835 |
| 6                                                                | -2.141785 | 1.206742  | 1.231044  |
| 6                                                                | -1.261216 | -1.135847 | -1.850345 |
| 6                                                                | -3.417650 | 1.665930  | 0.926719  |
| 6                                                                | -2.368945 | -0.429730 | -1.476830 |
| 6                                                                | -0.995896 | 0.921036  | 1.590636  |
| 12                                                               | 1.590920  | -2.070350 | -0.951148 |
| 12                                                               | 3.727743  | 3.806121  | -0.825835 |
| 6                                                                | -3.242598 | 0.245754  | -0.963448 |
| 6                                                                | 0.243229  | 0.338137  | 1.557640  |
| 8                                                                | -3.951772 | 1.114739  | -0.211017 |
| 8                                                                | 1.973350  | -0.038900 | -0.358440 |
| 6                                                                | 1.640649  | -3.107024 | 0.987703  |
| 6                                                                | 1.277434  | -2.170885 | 1.732911  |
| 6                                                                | 1.049624  | -0.801578 | 1.799067  |
| 6                                                                | 1.378019  | 0.062318  | 0.746978  |
| 16                                                               |           |           |           |
| 157.416527 Kcal/mol 6.826235 eV -101.132821 H MutD_4_76.log      |           |           |           |
| 6                                                                | 0.291283  | 1.454792  | -0.194379 |
| 6                                                                | 2.863115  | -2.056853 | -0.671379 |
| 6                                                                | -1.725262 | 2.489928  | 0.022552  |
| 6                                                                | -0.689890 | 0.393069  | -0.373287 |
| 6                                                                | 1.583411  | 0.998668  | -0.152729 |
| 6                                                                | 2.874496  | 1.288736  | 0.192679  |
| 12                                                               | 4.462091  | -0.888594 | 0.177630  |
| 6                                                                | -3.158707 | 0.392872  | -0.092249 |
| 12                                                               | 0.893650  | -1.072219 | -0.523683 |
| 6                                                                | -2.000392 | 1.060787  | -0.161050 |
| 6                                                                | 4.081318  | 1.142500  | 0.566994  |
| 6                                                                | -5.255925 | -1.020939 | 0.205865  |
| 6                                                                | -0.494114 | 2.723880  | 0.046872  |
| 8                                                                | -6.200978 | -1.709227 | 0.365716  |
| 8                                                                | 2.554122  | -1.783922 | 0.602051  |
| 6                                                                | -4.218344 | -0.288282 | 0.011859  |
| 16                                                               |           |           |           |
| 157.565388 Kcal/mol 6.832691 eV -101.132584 H Original3D_2_4.log |           |           |           |
| 6                                                                | -0.360331 | 0.348188  | 0.087538  |
| 8                                                                | 0.919167  | 2.680382  | -0.187027 |
| 6                                                                | 1.878765  | 1.947856  | -0.548702 |
| 6                                                                | 0.957144  | -0.065264 | -0.079323 |
| 12                                                               | -1.077915 | 2.334063  | 0.238971  |
| 6                                                                | 2.260882  | 0.607703  | -0.158098 |
| 6                                                                | -3.431926 | 1.003112  | -0.006941 |
| 6                                                                | 4.398519  | -0.853942 | 0.077798  |
| 8                                                                | 5.341906  | -1.599064 | 0.161099  |
| 6                                                                | -3.217642 | 2.165545  | 0.551441  |
| 6                                                                | -0.718597 | -2.219367 | 0.275149  |
| 6                                                                | -1.406028 | -3.198880 | 0.211067  |
| 6                                                                | -3.327375 | -0.259712 | -0.420800 |
| 6                                                                | 3.501398  | 0.017625  | -0.051832 |

|                                                                   |           |           |           |
|-------------------------------------------------------------------|-----------|-----------|-----------|
| 12                                                                | -3.334019 | -2.306601 | -0.267850 |
| 6                                                                 | -0.059036 | -0.989546 | 0.155032  |
| 16                                                                |           |           |           |
| 158.238810 Kcal/mol 6.861893 eV -101.131511 H Child_16_10.log     |           |           |           |
| 6                                                                 | -2.897044 | -1.791001 | -0.459619 |
| 6                                                                 | -0.109300 | 2.592622  | 0.808437  |
| 12                                                                | 1.416269  | -2.380641 | 0.400707  |
| 6                                                                 | 1.086462  | 2.449813  | 0.509133  |
| 6                                                                 | -1.759467 | -1.648969 | 0.369404  |
| 6                                                                 | 2.315980  | 2.012728  | 0.110930  |
| 6                                                                 | -3.595302 | -0.857939 | -0.894527 |
| 6                                                                 | 3.238540  | 1.397057  | -0.387310 |
| 6                                                                 | -0.652773 | -2.309390 | 0.735366  |
| 12                                                                | -1.823654 | 1.528089  | 0.498904  |
| 6                                                                 | -3.867682 | 0.458156  | -1.066190 |
| 6                                                                 | 3.791385  | -0.716230 | -0.582992 |
| 6                                                                 | 3.172269  | -1.747250 | -0.311902 |
| 8                                                                 | -1.453056 | -0.416742 | 0.887939  |
| 6                                                                 | -3.583026 | 1.655194  | -0.799624 |
| 8                                                                 | 4.209101  | 0.574476  | -0.760685 |
| 16                                                                |           |           |           |
| 158.785976 Kcal/mol 6.885620 eV -101.130639 H Original2D_0_27.log |           |           |           |
| 6                                                                 | 1.034176  | -0.094139 | 0.000000  |
| 8                                                                 | -0.820345 | 1.333141  | 0.000000  |
| 8                                                                 | 1.553351  | -2.887681 | -0.000000 |
| 6                                                                 | -0.000000 | -1.013282 | -0.000000 |
| 6                                                                 | -0.430614 | 2.577435  | 0.000000  |
| 6                                                                 | -1.461082 | -0.807078 | -0.000000 |
| 6                                                                 | 2.200778  | 0.447972  | 0.000000  |
| 12                                                                | 2.889570  | -1.576145 | -0.000000 |
| 6                                                                 | -2.016355 | 0.467004  | -0.000000 |
| 6                                                                 | -4.403135 | 1.549744  | -0.000000 |
| 6                                                                 | 0.289771  | -2.425804 | -0.000000 |
| 6                                                                 | 0.253741  | 3.635919  | 0.000000  |
| 6                                                                 | -3.246977 | 1.009899  | -0.000000 |
| 6                                                                 | -1.913403 | -2.159579 | -0.000000 |
| 12                                                                | 1.969508  | 2.536043  | 0.000000  |
| 6                                                                 | -1.002399 | -3.035165 | -0.000000 |
| 16                                                                |           |           |           |
| 159.216728 Kcal/mol 6.904299 eV -101.129952 H MutI_6_77.log       |           |           |           |
| 6                                                                 | -4.188878 | -0.218021 | -0.159250 |
| 6                                                                 | 0.678867  | -0.142329 | 0.147865  |
| 6                                                                 | -2.537987 | 1.781277  | 0.010890  |
| 8                                                                 | -2.295805 | -1.728704 | -0.069966 |
| 6                                                                 | 3.985228  | -1.786240 | -0.724975 |
| 12                                                                | -0.462822 | -2.113572 | -0.018837 |
| 6                                                                 | -0.509619 | 0.296558  | 0.176698  |
| 6                                                                 | 4.160032  | -0.522096 | -0.452146 |
| 6                                                                 | -1.907101 | 0.584874  | -0.001411 |
| 6                                                                 | 4.182494  | 0.761092  | -0.205984 |
| 6                                                                 | -2.869506 | -0.541316 | -0.088682 |
| 6                                                                 | -5.395395 | 0.208209  | -0.183669 |
| 6                                                                 | 4.173835  | 2.040234  | -0.028521 |
| 12                                                                | 2.301497  | -1.425911 | 0.744022  |
| 8                                                                 | -3.271002 | 2.697293  | 0.042227  |



|                                                                   |           |           |           |
|-------------------------------------------------------------------|-----------|-----------|-----------|
| 6                                                                 | 3.973091  | 3.325274  | 0.095800  |
| 16                                                                |           |           |           |
| 159.272297 Kcal/mol 6.906709 eV -101.129864 H Child_2_27.log      |           |           |           |
| 6                                                                 | 6.943291  | 1.339215  | -0.818393 |
| 12                                                                | -4.562400 | 2.329559  | -1.750288 |
| 6                                                                 | 5.804113  | 0.801460  | -0.467120 |
| 6                                                                 | -4.290222 | 0.765421  | -0.357354 |
| 6                                                                 | 4.675094  | 0.251879  | -0.182865 |
| 8                                                                 | -4.867803 | 0.374955  | 2.131989  |
| 6                                                                 | 3.391294  | 0.058487  | 0.252728  |
| 6                                                                 | -4.434258 | 0.283631  | 0.991350  |
| 6                                                                 | 2.902722  | 1.210464  | 0.869727  |
| 6                                                                 | -2.613312 | -1.288759 | -0.307347 |
| 6                                                                 | 1.931328  | -2.140481 | -0.054223 |
| 6                                                                 | -1.734929 | -2.156613 | -0.403498 |
| 6                                                                 | 2.616852  | -1.127501 | 0.105073  |
| 6                                                                 | -3.595668 | -0.373029 | 0.011331  |
| 12                                                                | 0.112955  | -2.918107 | -0.378120 |
| 8                                                                 | 2.844742  | 2.289736  | 1.331068  |
| 16                                                                |           |           |           |
| 159.627925 Kcal/mol 6.922131 eV -101.129297 H Original3D_0_57.log |           |           |           |
| 6                                                                 | 0.002103  | -0.898021 | -0.820596 |
| 6                                                                 | 2.493090  | 0.188259  | -0.081676 |
| 6                                                                 | 3.782630  | -0.082597 | 0.148462  |
| 6                                                                 | -2.028983 | 0.422902  | -1.795775 |
| 6                                                                 | -2.877379 | 0.522933  | 0.632550  |
| 8                                                                 | -2.962974 | -0.627839 | 1.252547  |
| 8                                                                 | -0.153079 | -2.194961 | -0.274222 |
| 6                                                                 | -2.228331 | 1.746972  | 0.509244  |
| 12                                                                | -1.811953 | -2.010633 | 0.590190  |
| 6                                                                 | -2.597882 | 0.956442  | -0.665002 |
| 6                                                                 | 5.161269  | -0.052415 | -0.284741 |
| 6                                                                 | 4.860693  | -0.464745 | 1.030928  |
| 6                                                                 | 1.151910  | -0.112131 | -0.467672 |
| 6                                                                 | -0.970333 | -0.295706 | -1.540094 |
| 12                                                                | -0.196703 | 2.342086  | 0.446806  |
| 6                                                                 | 1.423263  | 1.168932  | -0.044053 |
| 16                                                                |           |           |           |
| 159.977210 Kcal/mol 6.937277 eV -101.128740 H Child_10_56.log     |           |           |           |
| 6                                                                 | 9.415290  | -0.592082 | -0.957878 |
| 12                                                                | -4.201713 | 0.799551  | 0.030580  |
| 8                                                                 | 9.142376  | -0.154366 | 0.064737  |
| 6                                                                 | -4.262363 | -1.220922 | 0.000945  |
| 8                                                                 | 2.156869  | 0.713415  | 1.387441  |
| 6                                                                 | -3.433780 | -2.139203 | -0.098214 |
| 6                                                                 | 1.187869  | 0.430581  | 0.636760  |
| 6                                                                 | -2.853994 | 2.295381  | -0.157659 |
| 6                                                                 | 0.695584  | -0.894519 | 0.408933  |
| 6                                                                 | 0.008289  | -1.885768 | 0.166149  |
| 6                                                                 | -2.309645 | -2.935807 | -0.197566 |
| 12                                                                | 0.119936  | 2.166023  | -0.069954 |
| 6                                                                 | -1.961311 | 3.209225  | -0.393619 |
| 6                                                                 | -0.952997 | -2.827445 | -0.102838 |
| 6                                                                 | -1.514192 | -4.119308 | -0.490574 |
| 6                                                                 | -0.920855 | 4.003322  | -0.671929 |

```

16
160.030035 Kcal/mol 6.939568 eV -101.128656 H Child_10_22.log
6   4.049455   -1.690480   -1.167187
6   -5.711268   1.493755   -1.144704
6   4.127548   -0.452757   -0.904595
6   -4.846877   0.670520   -0.595400
6   3.654642   0.782740   -0.553468
6   -4.001716   -0.114776   -0.072293
12  2.022392   -1.513328   -0.556995
6   -3.035587   -1.059015   0.266111
6   2.703466   1.463508   -0.157624
6   -1.730672   -0.553507   0.222373
6   1.253637   1.514297   -0.105261
6   -0.558268   -0.181738   0.134078
6   0.784815   0.102980   0.146764
12  1.518402   0.368064   2.372347
8   -3.361247   -2.272683   0.506706
8   0.533176   2.508934   -0.281330
16
160.203863 Kcal/mol 6.947106 eV -101.128379 H Child_4_52.log
12  4.291291   3.256875   -0.578349
6   -0.061344   -1.954411   -0.173065
6   0.209956   1.983237   -1.141219
12  -2.027289   -2.461656   0.465864
6   -3.542688   1.507360   -0.029999
6   -1.125159   1.620428   -0.612133
6   1.044757   -2.570985   -0.365289
6   -0.141611   0.649617   -0.686247
6   2.120027   -3.294422   -0.529238
6   2.695853   0.724617   1.727789
6   3.179873   -4.015422   -0.659761
6   -2.318515   0.970304   -0.131353
6   -2.007491   -0.438191   0.102736
6   -0.652552   -0.635146   -0.257989
8   -4.628280   1.933695   0.017293
8   1.681448   0.963237   2.218260
16
160.295754 Kcal/mol 6.951091 eV -101.128233 H Child_8_9.log
6   1.594552   3.927197   -0.571184
6   1.518498   -2.022167   0.628057
6   1.351598   2.673028   -0.304264
12  6.618671   -0.940944   -0.261133
6   1.706733   1.254860   0.044107
6   2.201770   -0.923725   0.544597
6   2.665640   0.280774   0.361418
6   0.206905   -2.168158   0.453980
6   -3.338921   1.665067   0.528409
6   -3.463817   -1.878210   -0.461561
6   0.408390   1.504993   -0.175214
6   -2.232026   -1.529342   -0.166600
12  -1.440396   0.463781   -0.181800
6   -1.015737   -2.062414   0.186534
8   -4.588456   -1.917449   -0.816122
8   -4.381646   2.091765   0.679310
16

```

```

160.381388 Kcal/mol 6.954804 eV -101.128096 H MutD_1_70.log
6 0.639721 -1.986388 0.011590
6 1.790294 -2.617047 0.009826
6 -2.633860 -0.291017 -0.004348
6 -2.442499 2.470985 0.005317
6 2.482816 2.783160 -0.003005
6 1.275449 2.428124 -0.002004
6 -2.372595 0.985288 0.001878
6 0.510960 0.180361 0.002689
6 -1.220466 1.892308 0.003074
8 -1.640697 -1.343417 0.001491
12 -4.550434 -1.149977 -0.007428
8 3.762721 -1.145298 -0.011342
6 -0.290175 -1.017903 0.005719
6 2.923781 -2.058521 -0.005148
6 0.151324 1.527083 0.001513
12 2.728376 0.660904 0.000445
16
160.624238 Kcal/mol 6.965335 eV -101.127709 H Child_8_11.log
12 -5.061755 1.032992 -0.498296
6 2.105699 -2.367309 0.028943
6 -2.900315 0.476840 0.571158
8 3.364713 -1.888649 0.075108
6 2.919810 3.385788 -0.032763
6 0.916052 -2.626544 0.075690
6 -1.924706 1.265342 0.375499
6 -0.504887 -2.484730 -0.033471
6 2.839400 1.950425 -0.150399
6 3.446025 -0.555077 -0.019066
6 1.657903 2.644844 -0.079703
12 -2.056700 -1.399542 0.885349
6 0.311045 2.428653 -0.112410
8 -1.154928 -2.631007 -1.109259
6 -0.838852 1.997279 0.097301
6 3.263359 0.643798 -0.116017
16
161.406778 Kcal/mol 6.999269 eV -101.126462 H Original3D_6_4.log
6 1.983104 0.487356 0.431688
6 1.776897 -2.082671 0.371111
8 1.579728 -2.667974 1.444448
6 -1.158220 -1.345883 0.200030
6 2.435278 1.729898 0.443778
6 -0.203836 -0.387987 0.106751
6 2.548438 2.994743 0.358022
6 -2.391116 -1.534066 0.049550
12 0.629280 3.526821 -0.238691
6 1.226325 -0.566221 0.311929
6 -0.873030 2.143513 -0.426364
6 2.325966 -2.388950 -0.843238
8 -3.599473 -1.651768 -0.084979
12 -4.255499 0.621702 -0.055901
6 -0.558106 0.958737 -0.222327
6 2.833733 -2.545860 -2.004373
16
161.415394 Kcal/mol 6.999643 eV -101.126449 H MutD_3_68.log

```

|                                                                   |           |           |           |
|-------------------------------------------------------------------|-----------|-----------|-----------|
| 8                                                                 | 2.687890  | -1.260900 | 1.098661  |
| 6                                                                 | 2.985143  | 0.135635  | -0.588328 |
| 6                                                                 | -1.693687 | -1.751344 | -0.310927 |
| 12                                                                | -1.411245 | 2.465352  | 0.436386  |
| 6                                                                 | -3.183116 | 1.438885  | 0.577600  |
| 12                                                                | 4.482433  | -1.421801 | 0.189069  |
| 6                                                                 | 1.607482  | 2.093189  | -0.414381 |
| 6                                                                 | 0.532920  | 2.596628  | -0.123628 |
| 6                                                                 | -3.767802 | 0.386167  | 0.294353  |
| 6                                                                 | -2.922415 | -1.751510 | -0.299924 |
| 6                                                                 | -4.102089 | -0.961180 | -0.089290 |
| 6                                                                 | -5.195504 | -1.705976 | -0.381886 |
| 8                                                                 | 2.714737  | 1.524900  | -0.826763 |
| 6                                                                 | 0.719825  | -0.903056 | -0.154910 |
| 6                                                                 | 2.063624  | -0.587799 | 0.137785  |
| 6                                                                 | -0.390259 | -1.428740 | -0.259905 |
| 16                                                                |           |           |           |
| 161.508494 Kcal/mol 7.003680 eV -101.126300 H Child_15_28.log     |           |           |           |
| 6                                                                 | 0.825014  | 0.604720  | 1.893025  |
| 6                                                                 | -5.536527 | -2.222019 | -0.594584 |
| 6                                                                 | 2.979413  | 1.423340  | -0.895197 |
| 6                                                                 | -4.905798 | -1.163476 | -0.188737 |
| 6                                                                 | 3.742479  | 0.536996  | -1.354072 |
| 8                                                                 | -1.596117 | -0.498611 | -1.466926 |
| 6                                                                 | 1.412584  | -0.496560 | 1.800426  |
| 6                                                                 | -4.270330 | -0.128788 | 0.216576  |
| 6                                                                 | 2.932612  | -2.374646 | 0.824602  |
| 6                                                                 | -0.940490 | 0.426476  | -1.193861 |
| 6                                                                 | -2.985051 | 1.887520  | 1.197437  |
| 6                                                                 | -3.636643 | 0.912922  | 0.632400  |
| 6                                                                 | 2.186233  | -1.560009 | 1.415699  |
| 12                                                                | 1.388888  | 1.819287  | 0.328947  |
| 8                                                                 | -0.275872 | 1.372490  | -0.931450 |
| 12                                                                | 3.957356  | -1.325111 | -0.606887 |
| 16                                                                |           |           |           |
| 162.161971 Kcal/mol 7.032017 eV -101.125259 H Child_4_55.log      |           |           |           |
| 6                                                                 | -5.420779 | 1.149963  | -0.240652 |
| 8                                                                 | 4.357217  | 1.257609  | -0.324261 |
| 6                                                                 | -4.647236 | 1.439774  | 0.903712  |
| 6                                                                 | 0.796212  | 1.096357  | -1.130381 |
| 6                                                                 | -4.101488 | 0.615753  | -0.192792 |
| 6                                                                 | 2.655613  | -1.747645 | 0.226129  |
| 8                                                                 | 0.034289  | 0.247235  | 2.356605  |
| 12                                                                | 2.447619  | 0.265754  | -0.163359 |
| 6                                                                 | -2.972163 | -0.004012 | -0.553315 |
| 6                                                                 | 1.517429  | -2.273819 | 0.113086  |
| 6                                                                 | -1.604666 | 0.111711  | -0.935276 |
| 6                                                                 | -0.405601 | 0.766729  | -1.151935 |
| 6                                                                 | 1.019013  | 0.519916  | 1.829376  |
| 6                                                                 | 5.407741  | 1.741696  | -0.355171 |
| 6                                                                 | -2.065773 | -1.133194 | -0.522104 |
| 12                                                                | -0.464441 | -2.410598 | -0.186876 |
| 16                                                                |           |           |           |
| 162.176872 Kcal/mol 7.032664 eV -101.125235 H Original3D_0_58.log |           |           |           |
| 6                                                                 | 2.721041  | -1.972756 | -0.047446 |

|                                                              |           |           |           |
|--------------------------------------------------------------|-----------|-----------|-----------|
| 6                                                            | 2.143936  | 0.315800  | -0.225438 |
| 8                                                            | 1.449011  | 1.448578  | -0.328102 |
| 6                                                            | 1.487116  | -1.058270 | -0.123353 |
| 6                                                            | 0.189230  | -1.071560 | 0.666375  |
| 6                                                            | -0.816166 | -0.763433 | 1.573345  |
| 6                                                            | -1.065573 | -1.171592 | -1.413488 |
| 6                                                            | 0.097564  | -1.236687 | -0.649914 |
| 6                                                            | -1.983502 | -0.489708 | 1.965756  |
| 12                                                           | 3.154527  | 2.328198  | 0.122874  |
| 6                                                            | 3.535922  | 0.258948  | -0.047386 |
| 6                                                            | -3.887149 | 2.325579  | -0.429336 |
| 8                                                            | -4.332927 | 1.343523  | -0.014329 |
| 6                                                            | -2.300846 | -1.093827 | -1.620416 |
| 6                                                            | 3.682699  | -1.168077 | 0.105352  |
| 12                                                           | -3.134051 | -0.626807 | 0.228388  |
| 16                                                           |           |           |           |
| 162.251579 Kcal/mol 7.035903 eV -101.125116 H Child_7_37.log |           |           |           |
| 6                                                            | -3.656899 | 2.013279  | -0.456492 |
| 6                                                            | 2.889914  | -2.191803 | -0.932431 |
| 6                                                            | -3.865479 | -1.537824 | 0.132959  |
| 6                                                            | 2.179813  | -1.258934 | -0.290727 |
| 12                                                           | -2.827322 | 0.221405  | 0.635921  |
| 6                                                            | 2.788059  | -0.039675 | 0.309818  |
| 8                                                            | -3.433914 | 3.066976  | -0.825618 |
| 6                                                            | 0.755928  | -1.157181 | -0.057455 |
| 6                                                            | -2.780266 | -2.167823 | -0.095343 |
| 12                                                           | 3.354463  | 2.111166  | -0.145518 |
| 6                                                            | -0.794399 | 0.583561  | 0.707486  |
| 6                                                            | -0.267723 | -2.052993 | -0.248663 |
| 6                                                            | -1.458309 | -2.392424 | -0.216776 |
| 6                                                            | 1.801769  | 0.872871  | 0.647497  |
| 6                                                            | 0.472770  | 0.252574  | 0.454724  |
| 8                                                            | 4.094319  | 0.241446  | 0.124066  |
| 16                                                           |           |           |           |
| 162.283354 Kcal/mol 7.037281 eV -101.125065 H MutD_16_76.log |           |           |           |
| 6                                                            | 4.061014  | 3.528409  | -1.348597 |
| 8                                                            | 1.381403  | -0.351144 | 2.037602  |
| 6                                                            | -2.335837 | 0.647592  | 1.826021  |
| 6                                                            | 1.701449  | -0.917427 | 0.753663  |
| 8                                                            | 3.034426  | 3.391428  | -0.849980 |
| 6                                                            | 2.867321  | -1.336584 | 0.311237  |
| 6                                                            | -0.018111 | -0.169862 | 1.497373  |
| 12                                                           | -3.174341 | -0.718484 | -2.293003 |
| 6                                                            | -1.060753 | 0.373667  | 2.113748  |
| 6                                                            | -0.367208 | -0.996377 | -0.901657 |
| 6                                                            | -3.546898 | 0.919418  | 1.551698  |
| 6                                                            | 0.357518  | -0.750276 | 0.250544  |
| 6                                                            | 3.991955  | -1.737865 | -0.161236 |
| 12                                                           | -4.567849 | 0.541950  | -0.204258 |
| 6                                                            | 5.133092  | -2.133634 | -0.651919 |
| 6                                                            | -1.186935 | -1.127704 | -1.829847 |
| 16                                                           |           |           |           |
| 162.345027 Kcal/mol 7.039956 eV -101.124967 H Child_6_47.log |           |           |           |
| 6                                                            | -6.560339 | 0.564339  | -0.939126 |
| 8                                                            | 4.083865  | -2.224335 | -0.677193 |

|                                                               |           |           |           |
|---------------------------------------------------------------|-----------|-----------|-----------|
| 8                                                             | -5.805960 | 1.023208  | -1.679549 |
| 6                                                             | 2.960452  | -2.203815 | -0.485413 |
| 6                                                             | -3.915189 | 0.239283  | 1.047213  |
| 6                                                             | 6.033283  | 2.227383  | -0.377392 |
| 6                                                             | -2.739505 | -0.569637 | 0.786553  |
| 6                                                             | 4.804771  | 1.823994  | -0.234338 |
| 6                                                             | -2.581622 | 0.802548  | 0.920335  |
| 6                                                             | 3.583354  | 1.396141  | -0.085919 |
| 6                                                             | -1.943470 | -1.665458 | 0.527766  |
| 6                                                             | 2.369501  | 0.999550  | 0.076669  |
| 6                                                             | 1.146434  | 0.543828  | 0.226751  |
| 6                                                             | -1.053642 | -2.510067 | 0.269726  |
| 12                                                            | -0.658257 | 1.534762  | 0.669642  |
| 12                                                            | 0.754305  | -1.558055 | 0.035108  |
| 16                                                            |           |           |           |
| 162.395213 Kcal/mol 7.042132 eV -101.124887 H Child_12_56.log |           |           |           |
| 6                                                             | -3.682588 | 0.426376  | -0.041995 |
| 6                                                             | 3.042249  | 1.077394  | -1.511404 |
| 6                                                             | -4.737429 | 0.326556  | -0.772433 |
| 12                                                            | 3.337975  | -0.957537 | -1.119657 |
| 6                                                             | -2.546398 | 0.122921  | 0.431987  |
| 6                                                             | 1.975269  | 1.164629  | -0.849842 |
| 8                                                             | -5.737829 | 0.184272  | -1.402872 |
| 6                                                             | 0.811513  | 0.993224  | -0.160489 |
| 6                                                             | -1.308376 | -0.248281 | 0.785636  |
| 8                                                             | 1.977775  | 4.316273  | 0.925771  |
| 12                                                            | 1.106212  | -3.263065 | 0.570363  |
| 6                                                             | -0.981382 | -1.528152 | 1.334975  |
| 6                                                             | 3.021094  | -2.975677 | -0.386919 |
| 6                                                             | -0.525631 | -2.650638 | 1.637633  |
| 6                                                             | 1.258974  | 5.212557  | 0.928063  |
| 6                                                             | -0.202267 | 0.519569  | 0.339510  |
| 16                                                            |           |           |           |
| 162.630651 Kcal/mol 7.052341 eV -101.124512 H MutI_5_73.log   |           |           |           |
| 6                                                             | 3.066734  | -1.047523 | -0.078185 |
| 6                                                             | -3.914878 | 0.867186  | -1.035072 |
| 12                                                            | -3.491177 | -0.577834 | 1.326207  |
| 12                                                            | -5.542077 | 0.923142  | 0.259468  |
| 6                                                             | 4.874815  | 3.812414  | 0.425969  |
| 8                                                             | -1.452224 | 0.192191  | -1.347904 |
| 6                                                             | 3.952238  | -3.550485 | -0.062469 |
| 6                                                             | 3.707413  | 0.157070  | 0.064543  |
| 6                                                             | 4.100818  | 1.342361  | 0.201553  |
| 6                                                             | 1.651939  | -0.904129 | -0.209332 |
| 6                                                             | 3.556679  | -2.330618 | -0.084668 |
| 8                                                             | -1.717333 | -0.880569 | 0.668438  |
| 6                                                             | 4.506483  | 2.587714  | 0.321774  |
| 6                                                             | -0.911382 | -0.527329 | -0.255109 |
| 6                                                             | -2.735489 | 0.554582  | -1.258479 |
| 6                                                             | 0.437214  | -0.734021 | -0.295921 |
| 16                                                            |           |           |           |
| 163.017125 Kcal/mol 7.069101 eV -101.123896 H Child_10_52.log |           |           |           |
| 8                                                             | -4.027678 | 0.762499  | -1.064081 |
| 6                                                             | 8.156103  | 0.814169  | -1.191702 |
| 6                                                             | -3.361682 | 1.521149  | -0.186357 |

|                                                               |           |           |           |
|---------------------------------------------------------------|-----------|-----------|-----------|
| 6                                                             | 7.168499  | 0.142367  | -0.686371 |
| 8                                                             | -3.483670 | 2.721245  | -0.010835 |
| 6                                                             | -2.273924 | 0.761161  | 0.506268  |
| 6                                                             | 6.021422  | -0.329159 | -0.243716 |
| 6                                                             | -3.291411 | -2.782710 | -0.056533 |
| 6                                                             | 3.609103  | -0.371751 | 0.617930  |
| 6                                                             | -1.935609 | -0.622816 | 0.479492  |
| 6                                                             | 4.871608  | -0.539009 | 0.250638  |
| 6                                                             | -1.220805 | 1.277135  | 1.220154  |
| 6                                                             | 2.399489  | -0.092926 | 0.782005  |
| 6                                                             | -2.645814 | -1.805672 | 0.497947  |
| 12                                                            | 0.286415  | -0.235472 | 0.793694  |
| 12                                                            | -4.027338 | -1.072994 | -1.071960 |
| 16                                                            |           |           |           |
| 163.226984 Kcal/mol 7.078201 eV -101.123562 H Child_5_39.log  |           |           |           |
| 12                                                            | -2.561185 | -2.468229 | -1.608827 |
| 6                                                             | 0.880137  | 1.250446  | -0.255106 |
| 6                                                             | -2.351203 | -0.470382 | -0.958618 |
| 6                                                             | 1.368356  | 0.138502  | 0.079051  |
| 6                                                             | -2.217878 | -1.013204 | 0.318923  |
| 6                                                             | 8.432359  | 0.326575  | -0.225647 |
| 6                                                             | -2.177875 | -0.036275 | 1.363074  |
| 6                                                             | -1.605102 | 4.675932  | -0.258007 |
| 6                                                             | -1.735985 | -2.441660 | 0.447388  |
| 8                                                             | -1.672553 | 3.547106  | -0.453642 |
| 6                                                             | -2.003240 | 1.066990  | 1.954878  |
| 6                                                             | 1.318130  | -1.119378 | 0.549092  |
| 6                                                             | -0.536719 | -2.631486 | 0.892905  |
| 8                                                             | 7.386982  | -0.150587 | -0.299467 |
| 12                                                            | -1.294749 | 1.422342  | -0.234475 |
| 6                                                             | 0.721649  | -2.182977 | 0.782816  |
| 16                                                            |           |           |           |
| 163.346090 Kcal/mol 7.083366 eV -101.123372 H MutI_15_51.log  |           |           |           |
| 12                                                            | 4.494311  | 0.027096  | -0.186669 |
| 6                                                             | 3.489991  | 1.778474  | 0.262846  |
| 6                                                             | -3.159950 | 0.041712  | -0.843253 |
| 6                                                             | 0.908738  | 2.076792  | 0.066545  |
| 6                                                             | 2.225664  | 1.913127  | 0.177986  |
| 8                                                             | -1.655239 | -0.287183 | 2.718599  |
| 6                                                             | -0.163532 | 1.378616  | -0.275009 |
| 6                                                             | -1.948859 | 0.501780  | -0.616719 |
| 12                                                            | 3.020956  | -2.327287 | -0.439673 |
| 6                                                             | -0.591744 | 0.027480  | -0.454233 |
| 6                                                             | 0.951428  | -2.077906 | -0.271367 |
| 8                                                             | -1.564122 | 1.886007  | -0.463813 |
| 6                                                             | -2.637040 | -0.841203 | 2.967183  |
| 6                                                             | 0.105433  | -1.167791 | -0.394413 |
| 6                                                             | -5.566489 | -0.773462 | -1.324831 |
| 6                                                             | -4.351695 | -0.389003 | -1.048431 |
| 16                                                            |           |           |           |
| 163.511699 Kcal/mol 7.090547 eV -101.123108 H Child_12_39.log |           |           |           |
| 6                                                             | -1.930877 | -2.707390 | 0.008794  |
| 8                                                             | 1.926867  | 2.938570  | -0.018110 |
| 6                                                             | -0.689466 | -2.719605 | 0.027646  |
| 6                                                             | 0.631287  | 3.419849  | -0.086341 |

|                                                              |           |           |           |
|--------------------------------------------------------------|-----------|-----------|-----------|
| 6                                                            | 0.603913  | -2.412265 | 0.110668  |
| 6                                                            | 2.291361  | 1.655561  | 0.077254  |
| 6                                                            | -3.190484 | -2.222452 | -0.050008 |
| 8                                                            | -0.139898 | 2.272937  | 0.047367  |
| 6                                                            | 1.662635  | -1.746789 | 0.115748  |
| 6                                                            | -1.459855 | 2.167696  | 0.006473  |
| 6                                                            | -2.675900 | 1.968762  | -0.022940 |
| 6                                                            | 2.533632  | 0.456051  | 0.108870  |
| 6                                                            | -4.238105 | -1.534366 | -0.051705 |
| 6                                                            | 2.730799  | -0.917679 | 0.251637  |
| 12                                                           | 4.713599  | -1.664971 | -0.219669 |
| 12                                                           | -4.039381 | 0.486948  | -0.047885 |
| 16                                                           |           |           |           |
| 163.605679 Kcal/mol 7.094623 eV -101.122958 H MutI_11_69.log |           |           |           |
| 6                                                            | 0.805284  | -3.640818 | 0.716985  |
| 6                                                            | -1.643053 | 2.672571  | 0.021085  |
| 6                                                            | -2.763498 | 1.917410  | 0.023793  |
| 6                                                            | 4.081154  | 1.172974  | 0.103398  |
| 8                                                            | 2.275810  | -1.785495 | -0.407516 |
| 6                                                            | -4.196152 | -1.297728 | -0.095395 |
| 6                                                            | 0.865451  | 3.116426  | 0.045996  |
| 6                                                            | -0.479885 | 3.073522  | 0.031329  |
| 6                                                            | -0.083390 | -2.659229 | 0.036701  |
| 8                                                            | -4.509074 | 0.059653  | -0.022309 |
| 12                                                           | 3.761634  | -0.797853 | -0.147486 |
| 12                                                           | -2.005235 | -1.892649 | -0.104464 |
| 6                                                            | 3.181939  | 2.031975  | 0.112863  |
| 6                                                            | -3.621327 | 1.047833  | 0.011370  |
| 6                                                            | 1.271563  | -2.524298 | -0.016999 |
| 6                                                            | 2.046803  | 2.771487  | 0.085876  |
| 16                                                           |           |           |           |
| 163.680293 Kcal/mol 7.097858 eV -101.122839 H Child_7_58.log |           |           |           |
| 6                                                            | -4.343915 | 1.081174  | -0.183622 |
| 6                                                            | 3.076132  | 0.359042  | -0.137008 |
| 6                                                            | -1.563436 | -1.527442 | 0.213180  |
| 8                                                            | 2.894346  | -2.014734 | -0.318565 |
| 8                                                            | -5.442732 | 1.338433  | -0.476535 |
| 6                                                            | 2.302198  | -0.906956 | -0.175817 |
| 12                                                           | -2.275491 | 0.379529  | 0.253089  |
| 6                                                            | 3.002783  | 1.730012  | 0.017940  |
| 6                                                            | -0.891603 | -2.881522 | 0.142298  |
| 12                                                           | 1.246829  | 2.782527  | 0.239747  |
| 6                                                            | -0.475547 | 1.574223  | 0.172885  |
| 6                                                            | 4.303828  | 1.092515  | -0.224408 |
| 6                                                            | -0.947058 | -4.199385 | 0.172144  |
| 6                                                            | 0.879248  | -0.711094 | -0.037398 |
| 6                                                            | -0.200554 | -1.601936 | 0.061949  |
| 6                                                            | 0.313093  | 0.568995  | 0.052317  |
| 16                                                           |           |           |           |
| 163.737876 Kcal/mol 7.100355 eV -101.122747 H MutI_14_37.log |           |           |           |
| 6                                                            | 1.409730  | -1.605551 | 1.008903  |
| 6                                                            | 3.501181  | 1.541733  | 0.455794  |
| 6                                                            | 1.551776  | 1.472582  | -1.303241 |
| 8                                                            | -2.579807 | 1.189762  | 2.363284  |
| 6                                                            | 0.621244  | -0.714625 | 0.497809  |



|                                                               |            |           |           |
|---------------------------------------------------------------|------------|-----------|-----------|
| 6                                                             | -2.842619  | 0.326549  | -0.000363 |
| 12                                                            | 2.832117   | -0.101240 | 1.528656  |
| 12                                                            | 0.358521   | -2.962955 | -0.481789 |
| 6                                                             | 0.394480   | 0.757741  | -1.381251 |
| 6                                                             | -1.112661  | -1.507541 | -0.993661 |
| 6                                                             | -2.543581  | 0.970457  | 1.219259  |
| 8                                                             | -3.969722  | 0.575673  | -0.578517 |
| 6                                                             | 0.766485   | 1.552901  | -2.545577 |
| 6                                                             | 2.597547   | 1.632314  | -0.410998 |
| 6                                                             | -0.241966  | -0.191822 | -0.516048 |
| 6                                                             | -1.750186  | -0.460259 | -0.504051 |
| 16                                                            |            |           |           |
| 163.839054 Kcal/mol 7.104743 eV -101.122586 H Child_11_38.log |            |           |           |
| 8                                                             | 3.484603   | -3.952987 | 0.449523  |
| 12                                                            | -6.903139  | -3.019150 | -0.538000 |
| 6                                                             | 3.370022   | -2.901250 | -0.072809 |
| 6                                                             | -2.421475  | 1.462802  | -0.260187 |
| 6                                                             | 3.200549   | -1.722000 | -0.603313 |
| 6                                                             | -1.726367  | 2.233516  | -1.125679 |
| 6                                                             | 3.501301   | -0.758492 | -1.662774 |
| 6                                                             | -0.689605  | 2.815710  | -1.537854 |
| 6                                                             | 2.588137   | -0.405657 | -0.598267 |
| 6                                                             | -2.068665  | 0.859762  | 0.775690  |
| 6                                                             | 1.776552   | 0.421167  | 0.072768  |
| 6                                                             | 0.471818   | 2.685183  | -0.778846 |
| 12                                                            | 0.450598   | 0.836466  | 1.783369  |
| 8                                                             | -1.477944  | 0.349889  | 1.775832  |
| 6                                                             | 1.389904   | 1.747559  | -0.267295 |
| 6                                                             | 0.837363   | 2.731198  | 0.600688  |
| 16                                                            |            |           |           |
| 164.268983 Kcal/mol 7.123386 eV -101.121901 H Child_7_32.log  |            |           |           |
| 6                                                             | -3.483512  | -1.110957 | 0.032076  |
| 6                                                             | 4.463981   | 2.738878  | 0.199207  |
| 8                                                             | -4.670014  | -1.278391 | -0.007356 |
| 6                                                             | 3.149460   | 2.190134  | 0.482599  |
| 6                                                             | -2.240122  | -0.851622 | 0.024607  |
| 6                                                             | 4.042711   | 1.413249  | -0.237669 |
| 6                                                             | -0.931375  | -0.944106 | 0.221747  |
| 6                                                             | 4.046591   | 0.163182  | -0.817810 |
| 6                                                             | -0.011650  | -1.920126 | 0.845675  |
| 12                                                            | 1.295105   | 1.364363  | 0.809585  |
| 6                                                             | 1.034525   | -2.580799 | 1.157917  |
| 6                                                             | 3.827912   | -0.983097 | -1.272680 |
| 6                                                             | -5.675906  | 1.979043  | -0.191302 |
| 6                                                             | 0.332816   | -0.361152 | 0.053532  |
| 12                                                            | 2.038968   | -1.763587 | -0.657105 |
| 8                                                             | -6.747668  | 2.077756  | -0.594787 |
| 16                                                            |            |           |           |
| 164.352005 Kcal/mol 7.126986 eV -101.121769 H Child_13_22.log |            |           |           |
| 6                                                             | -13.550766 | 1.289318  | -1.395676 |
| 6                                                             | 5.378453   | 0.561489  | -1.921115 |
| 8                                                             | -13.831779 | 1.068105  | -0.303794 |
| 12                                                            | 3.434831   | -0.004253 | -1.246753 |
| 6                                                             | -1.145499  | -1.785226 | 1.228934  |
| 6                                                             | 5.330598   | 1.386511  | -0.972489 |

|                                                               |           |           |           |
|---------------------------------------------------------------|-----------|-----------|-----------|
| 6                                                             | -0.812226 | -2.571862 | 0.302738  |
| 6                                                             | 1.698686  | -1.120712 | -0.979472 |
| 6                                                             | -0.983507 | -0.684345 | 1.971783  |
| 8                                                             | 5.088847  | 2.191245  | 0.127066  |
| 6                                                             | -0.049330 | -3.067074 | -0.684045 |
| 6                                                             | 3.886113  | 1.809044  | 0.612014  |
| 6                                                             | -0.679798 | 0.310245  | 2.735269  |
| 12                                                            | 1.022451  | 0.179044  | 0.998602  |
| 6                                                             | 0.895944  | -2.109917 | -0.972551 |
| 6                                                             | 2.774011  | 1.287148  | 0.806549  |
| 16                                                            |           |           |           |
| 164.961251 Kcal/mol 7.153406 eV -101.120798 H Child_3_9.log   |           |           |           |
| 8                                                             | 1.495856  | 0.407404  | 1.162344  |
| 6                                                             | -3.842494 | -1.144210 | -1.246748 |
| 6                                                             | 0.291878  | 0.317108  | 0.881138  |
| 12                                                            | 2.966704  | -4.323902 | -0.158419 |
| 6                                                             | -0.461904 | 2.305203  | 2.158001  |
| 12                                                            | -4.237078 | 0.873346  | -0.895990 |
| 6                                                             | 0.678582  | -2.043434 | 0.295200  |
| 6                                                             | -2.920256 | 2.163205  | -0.050890 |
| 6                                                             | -0.636050 | 1.463253  | 1.135872  |
| 6                                                             | -2.662096 | -1.223147 | -0.745011 |
| 6                                                             | -0.256969 | -0.961387 | 0.320109  |
| 6                                                             | -1.851580 | 1.768580  | 0.451428  |
| 6                                                             | 4.758925  | 3.298153  | -0.666403 |
| 6                                                             | 1.554132  | -2.919886 | 0.255427  |
| 8                                                             | 5.529122  | 3.317608  | -1.523514 |
| 6                                                             | -1.478058 | -1.089010 | -0.197744 |
| 16                                                            |           |           |           |
| 165.040001 Kcal/mol 7.156821 eV -101.120672 H Child_13_28.log |           |           |           |
| 6                                                             | 4.841486  | -0.250935 | 1.004612  |
| 6                                                             | -2.967211 | -3.670756 | -0.963208 |
| 8                                                             | 3.142954  | 3.313498  | -1.117429 |
| 8                                                             | -2.230675 | -2.794893 | -0.782786 |
| 6                                                             | 2.882134  | 2.228746  | -0.776422 |
| 6                                                             | -3.287272 | 0.173602  | 0.167083  |
| 6                                                             | 3.615822  | 0.209586  | 0.363863  |
| 6                                                             | -4.103542 | 1.108133  | 0.388893  |
| 6                                                             | 3.617462  | -1.040622 | 0.940775  |
| 12                                                            | -1.620894 | -0.773666 | -0.281464 |
| 6                                                             | 2.633260  | 0.983984  | -0.340139 |
| 6                                                             | -4.942509 | 2.130801  | 0.623626  |
| 6                                                             | 1.386803  | 0.298265  | -0.453811 |
| 6                                                             | -5.626960 | 3.195308  | 0.842410  |
| 12                                                            | 1.748980  | -1.974762 | 0.830391  |
| 6                                                             | 0.477982  | -0.560730 | -0.361918 |
| 16                                                            |           |           |           |
| 165.972315 Kcal/mol 7.197250 eV -101.119187 H Child_1_37.log  |           |           |           |
| 6                                                             | -3.615933 | 2.639900  | 0.661346  |
| 6                                                             | 3.791129  | -0.938761 | 0.994285  |
| 6                                                             | -3.280841 | 1.351975  | 0.561405  |
| 6                                                             | 2.723950  | -1.560062 | 0.847362  |
| 8                                                             | -3.701592 | 0.055897  | 0.944341  |
| 6                                                             | 1.490241  | -2.036485 | 0.532124  |
| 6                                                             | -2.052793 | 0.930856  | -0.127117 |

|    |                                                               |           |           |
|----|---------------------------------------------------------------|-----------|-----------|
| 12 | 4.151998                                                      | 0.929885  | 0.288925  |
| 12 | -0.263689                                                     | 1.798862  | -0.853663 |
| 6  | 0.357506                                                      | -2.290856 | 0.132131  |
| 6  | -2.434598                                                     | -0.400566 | 0.236307  |
| 6  | 2.904756                                                      | 2.238865  | -0.593453 |
| 6  | 1.685236                                                      | 2.300236  | -0.860050 |
| 6  | -0.927924                                                     | -2.312787 | -0.508342 |
| 6  | -1.967083                                                     | -1.636027 | 0.163691  |
| 8  | -1.136106                                                     | -2.863734 | -1.627002 |
| 16 | 166.063531 Kcal/mol 7.201205 eV -101.119041 H Child_5_30.log  |           |           |
| 6  | -5.796786                                                     | -0.689640 | -0.016685 |
| 6  | 2.872888                                                      | 2.726737  | -0.029532 |
| 6  | -0.988210                                                     | -2.756195 | -0.019964 |
| 6  | 1.821825                                                      | 3.318210  | 0.001193  |
| 6  | 0.322724                                                      | -3.159551 | 0.042507  |
| 6  | 0.437361                                                      | 3.715654  | -0.035014 |
| 8  | -4.823394                                                     | -0.026397 | -0.028857 |
| 6  | 3.533048                                                      | 1.524896  | -0.003845 |
| 6  | -1.602310                                                     | -1.540048 | -0.092804 |
| 6  | -0.764248                                                     | 3.429743  | -0.006200 |
| 6  | 1.630554                                                      | -2.932806 | -0.027693 |
| 6  | 3.976054                                                      | 0.385993  | 0.013840  |
| 6  | 2.816861                                                      | -3.420179 | -0.035864 |
| 12 | 3.272550                                                      | -1.317481 | 0.031124  |
| 12 | -2.490691                                                     | 1.447731  | 0.035314  |
| 8  | -2.544216                                                     | -0.621088 | 0.086747  |
| 16 | 166.299308 Kcal/mol 7.211430 eV -101.118666 H Child_3_27.log  |           |           |
| 6  | -2.156056                                                     | 2.118682  | -0.124006 |
| 8  | 3.766846                                                      | -2.613731 | 0.015970  |
| 12 | -4.031041                                                     | 1.491759  | -0.024455 |
| 6  | -0.029642                                                     | -1.616598 | -0.166389 |
| 6  | -0.959200                                                     | 1.748577  | -0.119580 |
| 12 | 1.908782                                                      | -2.371345 | -0.026204 |
| 6  | 0.252619                                                      | 1.133913  | -0.001802 |
| 6  | -1.421389                                                     | -1.682208 | -0.107974 |
| 6  | -4.749790                                                     | -0.357581 | 0.164802  |
| 6  | -2.660691                                                     | -1.692487 | 0.035338  |
| 8  | 4.502949                                                      | 2.740083  | -0.026502 |
| 6  | 3.033702                                                      | 0.711836  | 0.097180  |
| 6  | -3.891552                                                     | -1.188646 | 0.162322  |
| 6  | 0.490164                                                      | -0.241323 | -0.073783 |
| 6  | 3.713230                                                      | 1.967891  | 0.138728  |
| 6  | 1.596732                                                      | 0.688648  | 0.110524  |
| 16 | 166.761583 Kcal/mol 7.231476 eV -101.117929 H Child_15_10.log |           |           |
| 12 | 4.190746                                                      | 0.159266  | 1.325352  |
| 8  | -6.820995                                                     | 2.331142  | 0.542854  |
| 6  | 2.433676                                                      | 0.648533  | -0.710957 |
| 6  | -5.012892                                                     | -2.336140 | -1.355082 |
| 6  | 3.657884                                                      | 0.526759  | -0.964623 |
| 6  | -3.818617                                                     | -2.285244 | -0.807034 |
| 6  | 5.012821                                                      | 0.347522  | -1.010743 |
| 6  | -5.717137                                                     | 2.420067  | 0.857790  |

|    |                                                                   |           |           |
|----|-------------------------------------------------------------------|-----------|-----------|
| 6  | 1.119444                                                          | 0.703007  | -0.297768 |
| 6  | -2.684014                                                         | -2.121592 | -0.218868 |
| 6  | 0.029127                                                          | 1.149103  | -0.806469 |
| 6  | -1.558795                                                         | -1.898838 | 0.417504  |
| 12 | 1.393091                                                          | -0.667321 | 1.494922  |
| 6  | -0.519501                                                         | -1.584058 | 1.045130  |
| 6  | 6.306221                                                          | 0.259912  | -0.891980 |
| 8  | -0.990924                                                         | 1.559165  | -1.215940 |
| 16 | 166.819489 Kcal/mol 7.233987 eV -101.117837 H Original2D_0_10.log |           |           |
| 6  | -1.529296                                                         | -0.695062 | -0.000000 |
| 6  | -2.931465                                                         | -1.044612 | -0.000000 |
| 8  | -0.530883                                                         | -1.601569 | -0.000000 |
| 6  | 2.689511                                                          | 1.752854  | 0.000000  |
| 12 | -3.161928                                                         | 0.892952  | -0.000000 |
| 6  | -3.103210                                                         | -2.421247 | -0.000000 |
| 8  | 3.951967                                                          | -1.559049 | -0.000000 |
| 12 | -0.788324                                                         | -3.468876 | -0.000000 |
| 6  | -2.858109                                                         | -3.663027 | -0.000000 |
| 6  | -1.130545                                                         | 0.565883  | 0.000000  |
| 6  | 1.199353                                                          | 1.796654  | 0.000000  |
| 6  | 4.953366                                                          | -1.072686 | 0.000000  |
| 6  | 1.978549                                                          | 4.307563  | 0.000000  |
| 6  | 2.116800                                                          | 3.007722  | 0.000000  |
| 6  | 1.954104                                                          | 5.632474  | 0.000000  |
| 6  | 0.000000                                                          | 1.199492  | 0.000000  |
| 16 | 166.903311 Kcal/mol 7.237622 eV -101.117703 H Child_9_62.log      |           |           |
| 6  | 3.506533                                                          | -3.507158 | -0.570876 |
| 6  | -3.854256                                                         | -1.196452 | 1.536520  |
| 6  | 2.479325                                                          | -2.763613 | -0.411886 |
| 6  | -2.744453                                                         | 3.513214  | -0.389638 |
| 6  | 1.390978                                                          | -1.996252 | -0.269058 |
| 6  | -3.653355                                                         | -0.090800 | 0.954824  |
| 6  | -0.002804                                                         | -1.876030 | 0.013145  |
| 6  | -2.743292                                                         | 2.131689  | -0.009796 |
| 8  | 7.438258                                                          | 1.813618  | 1.004016  |
| 6  | -2.952995                                                         | 0.746498  | 0.090488  |
| 6  | 0.730569                                                          | -0.734359 | -0.373999 |
| 6  | -1.512521                                                         | 2.766171  | -0.261978 |
| 6  | 6.756962                                                          | 2.126419  | 0.134002  |
| 8  | -2.087032                                                         | 0.048495  | -0.676404 |
| 12 | -0.212904                                                         | 1.053279  | -0.731494 |
| 12 | -2.054926                                                         | -1.854351 | 0.292212  |
| 16 | 167.010170 Kcal/mol 7.242256 eV -101.117533 H Child_10_14.log     |           |           |
| 8  | 6.407147                                                          | -0.606888 | -0.852672 |
| 8  | -2.271985                                                         | -2.603582 | 1.344683  |
| 6  | 5.379746                                                          | -0.104306 | -0.578666 |
| 6  | -2.626899                                                         | -2.417078 | -2.444790 |
| 6  | 4.246687                                                          | 0.470760  | -0.265068 |
| 6  | -2.096383                                                         | -1.777577 | -1.461032 |
| 6  | 3.152606                                                          | 0.969643  | 0.110735  |
| 6  | -1.588574                                                         | -1.627701 | 1.004964  |
| 6  | -1.732289                                                         | -1.030027 | -0.390231 |

|                                                                   |           |           |           |
|-------------------------------------------------------------------|-----------|-----------|-----------|
| 12                                                                | 1.159747  | 1.242987  | 0.841877  |
| 12                                                                | -4.106525 | 2.468546  | -0.338088 |
| 6                                                                 | 0.334515  | -0.170336 | 2.095429  |
| 6                                                                 | -1.469465 | 0.358381  | -0.527632 |
| 6                                                                 | -1.994240 | 1.652686  | -0.668449 |
| 6                                                                 | -0.631885 | 1.474863  | -0.303883 |
| 6                                                                 | -0.593811 | -0.941746 | 1.765031  |
| 16                                                                |           |           |           |
| 167.062957 Kcal/mol 7.244545 eV -101.117449 H Original3D_18_3.log |           |           |           |
| 8                                                                 | 0.092985  | 1.612444  | -0.059703 |
| 6                                                                 | -0.664407 | 0.638870  | 0.214200  |
| 6                                                                 | 3.381410  | 0.173786  | 0.883968  |
| 6                                                                 | 1.932607  | -1.025112 | -1.396191 |
| 6                                                                 | 2.958282  | -0.980885 | 0.371714  |
| 6                                                                 | 2.157679  | -1.848155 | -0.217857 |
| 6                                                                 | -1.940811 | 0.130139  | 0.351997  |
| 6                                                                 | -0.845909 | -0.697259 | 0.639223  |
| 12                                                                | 1.882842  | 1.779124  | -0.627187 |
| 8                                                                 | -3.563556 | 1.668200  | 0.784007  |
| 6                                                                 | -3.365501 | 0.522256  | 0.272686  |
| 6                                                                 | -4.714871 | -1.302871 | -1.108988 |
| 12                                                                | 0.364032  | -2.357149 | 0.804809  |
| 6                                                                 | 1.921978  | 0.105373  | -1.961005 |
| 6                                                                 | -4.155492 | -0.371015 | -0.423583 |
| 6                                                                 | 3.468715  | 1.436731  | 1.052851  |
| 16                                                                |           |           |           |
| 167.140551 Kcal/mol 7.247909 eV -101.117325 H Child_9_48.log      |           |           |           |
| 8                                                                 | -7.538880 | -3.978117 | 0.170371  |
| 8                                                                 | 4.720718  | -1.588363 | -0.550620 |
| 6                                                                 | -7.878878 | -4.882932 | -0.451293 |
| 6                                                                 | 3.705551  | -0.893820 | -1.160297 |
| 6                                                                 | -2.633143 | 3.043901  | -0.095464 |
| 6                                                                 | -1.625931 | 2.275117  | -0.052951 |
| 6                                                                 | 2.556976  | -0.496035 | 1.073921  |
| 6                                                                 | -3.643304 | 3.873536  | -0.127011 |
| 6                                                                 | 3.674701  | -0.683002 | -2.493519 |
| 6                                                                 | -0.547634 | 1.529192  | 0.110227  |
| 6                                                                 | 2.613418  | -0.349812 | -0.309018 |
| 6                                                                 | -4.598659 | 4.742370  | -0.130860 |
| 6                                                                 | 1.521208  | 0.397868  | -0.908140 |
| 12                                                                | 4.304440  | -1.613034 | 1.277452  |
| 6                                                                 | 0.441772  | 0.994607  | -0.702795 |
| 12                                                                | 0.781296  | 0.548525  | 1.599648  |
| 16                                                                |           |           |           |
| 167.194014 Kcal/mol 7.250228 eV -101.117240 H Child_6_12.log      |           |           |           |
| 6                                                                 | 3.003390  | 1.807477  | -1.323940 |
| 6                                                                 | -3.050018 | -1.799093 | -0.055643 |
| 6                                                                 | 1.879587  | 1.614094  | -0.627602 |
| 6                                                                 | -3.586652 | -0.554233 | -0.088675 |
| 6                                                                 | 1.423496  | 2.108740  | 0.628780  |
| 6                                                                 | -2.183806 | -2.679609 | -0.016081 |
| 8                                                                 | 4.592071  | -1.135490 | 0.297245  |
| 6                                                                 | -3.447786 | 0.670533  | -0.111763 |
| 6                                                                 | 0.505191  | 2.329503  | 1.491216  |
| 6                                                                 | -0.874751 | -3.055490 | 0.025203  |

|                                                                   |           |           |           |
|-------------------------------------------------------------------|-----------|-----------|-----------|
| 6                                                                 | 3.457689  | -0.986073 | 0.227311  |
| 8                                                                 | -3.068832 | 1.902438  | -0.095411 |
| 6                                                                 | 0.587356  | 0.871470  | -0.543647 |
| 6                                                                 | 0.382618  | -3.107102 | 0.059047  |
| 12                                                                | -1.167053 | 2.079869  | 0.033434  |
| 12                                                                | 1.103403  | -1.201276 | -0.000093 |
| 16                                                                |           |           |           |
| 167.413639 Kcal/mol 7.259752 eV -101.116890 H Original2D_10_1.log |           |           |           |
| 12                                                                | -0.000000 | -0.393874 | -0.000000 |
| 6                                                                 | -2.121365 | -0.487975 | -0.000000 |
| 6                                                                 | -3.413508 | 0.263124  | -0.000000 |
| 6                                                                 | 0.290002  | 1.792008  | 0.000000  |
| 6                                                                 | -3.263892 | -2.393099 | -0.000000 |
| 6                                                                 | -4.509859 | -1.947497 | -0.000000 |
| 6                                                                 | -2.004157 | -1.951610 | -0.000000 |
| 12                                                                | -1.884775 | 1.744847  | 0.000000  |
| 8                                                                 | 3.539161  | 3.795852  | 0.000000  |
| 6                                                                 | 2.900641  | -1.678422 | 0.000000  |
| 6                                                                 | 2.430666  | 3.275157  | 0.000000  |
| 6                                                                 | 5.327926  | -2.619459 | 0.000000  |
| 6                                                                 | 4.071031  | -2.225096 | 0.000000  |
| 6                                                                 | 1.399747  | 2.489632  | 0.000000  |
| 8                                                                 | 1.767305  | -1.227527 | -0.000000 |
| 6                                                                 | -4.412969 | -0.643141 | -0.000000 |
| 16                                                                |           |           |           |
| 167.579674 Kcal/mol 7.266952 eV -101.116625 H MutI_17_69.log      |           |           |           |
| 6                                                                 | -3.365550 | -1.211013 | -0.084724 |
| 6                                                                 | 7.387939  | 0.591844  | -0.607800 |
| 6                                                                 | -1.043157 | 1.890518  | 0.256152  |
| 8                                                                 | -3.805535 | -0.005679 | 0.560059  |
| 12                                                                | 1.194204  | -1.974972 | 0.214166  |
| 6                                                                 | 3.633069  | -0.066498 | 0.139994  |
| 6                                                                 | 6.130426  | 0.345530  | -0.350923 |
| 6                                                                 | -3.588022 | 1.263459  | -0.103949 |
| 6                                                                 | 2.349263  | -0.244961 | 0.344372  |
| 6                                                                 | -2.016857 | -1.608890 | -0.067047 |
| 8                                                                 | -4.501543 | 1.778976  | -0.714000 |
| 6                                                                 | -4.398634 | -1.885209 | -0.621438 |
| 12                                                                | 0.895874  | 1.289042  | 0.454843  |
| 6                                                                 | -2.256430 | 1.717801  | 0.097077  |
| 6                                                                 | 4.881457  | 0.121344  | -0.104688 |
| 6                                                                 | -0.817555 | -1.906462 | -0.029792 |
| 16                                                                |           |           |           |
| 167.678135 Kcal/mol 7.271221 eV -101.116468 H Child_11_33.log     |           |           |           |
| 6                                                                 | 3.620000  | -2.628432 | -1.893763 |
| 6                                                                 | -5.488134 | -2.376754 | -0.058439 |
| 6                                                                 | 3.231660  | -1.983283 | -0.847798 |
| 6                                                                 | -4.496773 | -1.567473 | 0.141493  |
| 6                                                                 | 2.566716  | -1.230765 | 0.024695  |
| 6                                                                 | -3.606103 | -0.629354 | 0.202974  |
| 6                                                                 | 2.704953  | -0.203429 | 1.069077  |
| 6                                                                 | -2.713385 | 0.275963  | 0.266537  |
| 6                                                                 | 2.456768  | 1.108585  | 0.448219  |
| 6                                                                 | -1.710520 | 1.216781  | 0.024690  |
| 6                                                                 | 1.928747  | 1.964588  | -0.261514 |

|                                                                  |           |           |           |
|------------------------------------------------------------------|-----------|-----------|-----------|
| 12                                                               | 0.386341  | -1.378998 | -0.186207 |
| 12                                                               | 0.226617  | 2.987154  | -0.738842 |
| 6                                                                | -1.073773 | 0.045330  | 0.125755  |
| 8                                                                | -1.546574 | 2.519802  | -0.326348 |
| 8                                                                | 2.562019  | -0.425853 | 2.282478  |
| 16                                                               |           |           |           |
| 168.562468 Kcal/mol 7.309570 eV -101.115059 H MutI_13_75.log     |           |           |           |
| 8                                                                | -5.498504 | -1.719219 | 0.672068  |
| 6                                                                | -4.564514 | 1.754551  | 1.009147  |
| 6                                                                | 0.047768  | 1.302265  | -1.587616 |
| 6                                                                | 8.613597  | -0.921223 | 0.826006  |
| 6                                                                | -3.277467 | -1.049568 | -0.068095 |
| 6                                                                | 3.763500  | 0.488012  | -0.117460 |
| 6                                                                | -4.750098 | 0.552365  | 0.682348  |
| 6                                                                | -0.704909 | 1.259243  | -0.566205 |
| 12                                                               | 1.765181  | 1.119473  | -0.563285 |
| 8                                                                | -1.247177 | -1.933711 | -1.191982 |
| 6                                                                | -2.287532 | -1.571511 | -0.671394 |
| 6                                                                | 4.902357  | 0.043611  | 0.164254  |
| 6                                                                | 6.137556  | -0.323156 | 0.404825  |
| 6                                                                | -4.622967 | -0.861880 | 0.416351  |
| 6                                                                | 7.349837  | -0.647852 | 0.612313  |
| 12                                                               | -2.571626 | 1.303384  | 0.357658  |
| 16                                                               |           |           |           |
| 168.598240 Kcal/mol 7.311121 eV -101.115002 H Original3D_4_7.log |           |           |           |
| 6                                                                | -2.622900 | 1.423431  | 1.337923  |
| 6                                                                | -4.463979 | -0.388963 | -0.093456 |
| 6                                                                | -0.487570 | 0.863821  | 0.014915  |
| 6                                                                | 0.172884  | -2.143668 | 0.449598  |
| 12                                                               | -1.382687 | -1.084827 | -0.743846 |
| 12                                                               | 0.247722  | 0.397984  | -2.552158 |
| 8                                                                | 3.828403  | -1.693134 | 1.010934  |
| 6                                                                | -1.483125 | 1.246164  | 0.707633  |
| 8                                                                | -3.525223 | -1.063803 | -0.302755 |
| 6                                                                | 0.781888  | 1.091545  | -0.505015 |
| 6                                                                | -3.690281 | 1.557180  | 2.028411  |
| 6                                                                | 2.695070  | -1.863988 | 0.838234  |
| 6                                                                | 1.973458  | 1.403582  | -0.181684 |
| 6                                                                | 3.229340  | 1.694173  | 0.036346  |
| 6                                                                | 4.342418  | 2.230619  | 0.382340  |
| 6                                                                | 1.418486  | -2.064295 | 0.632524  |
| 16                                                               |           |           |           |
| 169.075727 Kcal/mol 7.331827 eV -101.114241 H Child_14_10.log    |           |           |           |
| 8                                                                | -5.731975 | -0.144379 | -0.350863 |
| 6                                                                | 1.538074  | -2.872810 | -0.256079 |
| 6                                                                | -4.539618 | -0.128551 | -0.298131 |
| 6                                                                | 2.530665  | -2.151332 | -0.423128 |
| 6                                                                | -3.234294 | -0.089903 | -0.241163 |
| 8                                                                | 3.396511  | -1.115921 | -0.583264 |
| 6                                                                | -1.988907 | 0.673188  | -0.128973 |
| 6                                                                | 3.053980  | 1.313672  | -0.451231 |
| 6                                                                | -1.936562 | -0.712196 | -0.056341 |
| 6                                                                | 2.836708  | 0.062710  | -0.014751 |
| 12                                                               | -0.339417 | 1.880393  | 0.407092  |
| 6                                                                | 1.280505  | 3.156442  | -0.264546 |

|                                                               |           |           |           |
|---------------------------------------------------------------|-----------|-----------|-----------|
| 6                                                             | 1.696380  | -0.071688 | 0.805501  |
| 12                                                            | -0.159281 | -1.851770 | 0.419092  |
| 6                                                             | 0.595588  | 0.055613  | 1.410020  |
| 6                                                             | 2.278830  | 2.388008  | -0.488045 |
| 16                                                            |           |           |           |
| 169.961910 Kcal/mol 7.370255 eV -101.112829 H Child_9_60.log  |           |           |           |
| 6                                                             | -3.764318 | -1.203061 | -0.398516 |
| 6                                                             | 5.014078  | 2.374890  | -0.514723 |
| 6                                                             | -2.999347 | -2.184351 | -0.398077 |
| 6                                                             | 5.028600  | 1.165640  | -0.132216 |
| 12                                                            | -4.267803 | 0.765475  | -0.226350 |
| 6                                                             | 4.626774  | -0.045410 | 0.198540  |
| 6                                                             | -1.990553 | -3.181050 | -0.323830 |
| 6                                                             | 4.150768  | -1.184895 | 0.504195  |
| 6                                                             | -1.811651 | -4.492397 | -0.606102 |
| 12                                                            | 2.528596  | -2.389242 | 0.699055  |
| 6                                                             | -4.099440 | 2.760346  | 0.088249  |
| 8                                                             | -2.903151 | 4.883493  | 0.660825  |
| 6                                                             | -0.625643 | -2.941662 | 0.088601  |
| 6                                                             | -3.456442 | 3.831303  | 0.373531  |
| 6                                                             | 0.569162  | -2.870401 | 0.414929  |
| 8                                                             | 5.030470  | 3.530443  | -0.840818 |
| 16                                                            |           |           |           |
| 170.348416 Kcal/mol 7.387016 eV -101.112213 H Child_11_36.log |           |           |           |
| 6                                                             | 4.038973  | 1.330059  | 0.028105  |
| 8                                                             | -3.853346 | 0.493933  | -0.250407 |
| 6                                                             | 2.301275  | -3.239345 | -0.235680 |
| 6                                                             | -3.073628 | 1.486449  | -0.126651 |
| 6                                                             | 2.546218  | -2.002211 | -0.179473 |
| 6                                                             | -2.200849 | 2.353853  | 0.002291  |
| 6                                                             | 2.964791  | 0.506592  | -0.083406 |
| 6                                                             | -0.958940 | 2.828233  | 0.095718  |
| 6                                                             | 2.155511  | -0.645499 | -0.079906 |
| 12                                                            | -3.341159 | -1.341762 | -0.125642 |
| 6                                                             | 2.601490  | 1.923250  | 0.027311  |
| 6                                                             | 0.275613  | 3.004398  | 0.137311  |
| 12                                                            | 0.169858  | -2.455127 | 0.032542  |
| 6                                                             | 1.533861  | 2.603916  | 0.103104  |
| 8                                                             | 0.856940  | -0.505984 | 0.039887  |
| 6                                                             | -1.846504 | -2.539850 | 0.778170  |
| 16                                                            |           |           |           |
| 171.454310 Kcal/mol 7.434972 eV -101.110451 H Child_6_26.log  |           |           |           |
| 6                                                             | -5.060413 | -1.182013 | -0.716871 |
| 6                                                             | 3.309433  | -2.445092 | 0.000041  |
| 6                                                             | -5.060553 | -1.180748 | 0.715476  |
| 12                                                            | 4.258929  | -0.649710 | -0.001657 |
| 6                                                             | -3.884647 | -0.768249 | -0.001062 |
| 6                                                             | 2.158963  | -1.939275 | 0.000604  |
| 6                                                             | -2.619813 | -0.299882 | -0.000495 |
| 6                                                             | 2.911041  | 0.950085  | -0.000642 |
| 6                                                             | -1.679454 | 0.782071  | 0.000433  |
| 6                                                             | 1.130909  | -0.956361 | 0.001239  |
| 8                                                             | -1.460552 | 2.069942  | -0.000443 |
| 6                                                             | 1.570542  | 0.308740  | 0.000237  |
| 6                                                             | -1.206983 | -0.488933 | 0.000912  |



|                                                                  |           |           |           |
|------------------------------------------------------------------|-----------|-----------|-----------|
| 6                                                                | 1.833744  | 1.770066  | 0.001069  |
| 8                                                                | -0.233611 | -1.398276 | 0.002066  |
| 12                                                               | 0.169128  | 2.926728  | 0.000105  |
| 16                                                               |           |           |           |
| 171.736122 Kcal/mol 7.447192 eV -101.110001 H Original3D_4_4.log |           |           |           |
| 6                                                                | 1.085643  | -0.164791 | -0.133849 |
| 6                                                                | 2.373451  | 1.925103  | 0.409136  |
| 6                                                                | -0.320199 | -0.100959 | 0.304791  |
| 6                                                                | 2.024960  | -1.051310 | -0.610296 |
| 12                                                               | 0.831252  | -2.706923 | -0.390426 |
| 6                                                                | -1.252458 | -1.112054 | 0.622767  |
| 6                                                                | -4.636271 | 1.082833  | -2.100689 |
| 8                                                                | -0.832673 | -2.378500 | 0.389318  |
| 6                                                                | 3.627899  | 2.035316  | 0.243646  |
| 12                                                               | 3.738674  | 0.092074  | -0.769702 |
| 8                                                                | -3.720780 | 1.296340  | -1.446627 |
| 6                                                                | 1.169606  | 1.274217  | 0.334568  |
| 6                                                                | -0.244818 | 1.360892  | 0.649897  |
| 6                                                                | -3.477280 | -0.216208 | 1.728733  |
| 6                                                                | -0.937601 | 2.404125  | 1.142799  |
| 6                                                                | -2.481512 | -0.764586 | 1.138496  |
| 16                                                               |           |           |           |
| 171.750759 Kcal/mol 7.447827 eV -101.109978 H Child_3_43.log     |           |           |           |
| 6                                                                | -2.979999 | 0.512234  | -0.201154 |
| 12                                                               | 4.431124  | -1.165454 | -0.448299 |
| 6                                                                | -4.127533 | -0.035659 | -0.241332 |
| 6                                                                | 4.389380  | 0.888938  | -0.268812 |
| 6                                                                | -1.762296 | 1.032006  | -0.108462 |
| 6                                                                | 3.190699  | 1.185185  | 0.018775  |
| 6                                                                | -1.352765 | 2.441248  | -0.068405 |
| 6                                                                | 2.490147  | -1.788472 | 0.221051  |
| 6                                                                | -5.236762 | -0.672009 | -0.098735 |
| 6                                                                | 1.896785  | 0.798590  | 0.357474  |
| 6                                                                | -0.509076 | 0.221868  | 0.048850  |
| 12                                                               | 0.304287  | -1.738583 | 0.101586  |
| 6                                                                | 0.549951  | 1.199361  | 0.174510  |
| 6                                                                | -0.107548 | 2.500198  | 0.072006  |
| 8                                                                | -6.263779 | -1.285747 | 0.009115  |
| 8                                                                | 1.829923  | -0.570813 | 0.581629  |
| 16                                                               |           |           |           |
| 172.000346 Kcal/mol 7.458650 eV -101.109580 H Child_2_18.log     |           |           |           |
| 12                                                               | -4.486205 | 1.678050  | 0.272863  |
| 12                                                               | 2.235457  | 0.189386  | -1.632555 |
| 6                                                                | -1.236100 | -4.266047 | 0.734643  |
| 8                                                                | 1.898156  | 3.193656  | 1.089559  |
| 6                                                                | -1.534178 | -3.040425 | 0.418994  |
| 6                                                                | 2.520601  | -1.453226 | -0.096012 |
| 6                                                                | -2.894994 | 0.540584  | -0.692568 |
| 6                                                                | 0.949266  | 1.609851  | -0.511552 |
| 6                                                                | -1.846230 | -1.819909 | 0.110142  |
| 6                                                                | 1.775740  | 2.051612  | 0.637979  |
| 6                                                                | -1.491697 | 0.730920  | -0.513917 |
| 6                                                                | 2.679884  | -0.376890 | 0.835424  |
| 6                                                                | -2.094884 | -0.590609 | -0.214437 |
| 6                                                                | -0.309071 | 1.305424  | -0.549283 |

|                                                               |           |           |           |
|---------------------------------------------------------------|-----------|-----------|-----------|
| 6                                                             | 2.459118  | 0.831665  | 1.044087  |
| 8                                                             | 2.244873  | -2.637023 | 0.047356  |
| 16                                                            |           |           |           |
| 172.386788 Kcal/mol 7.475408 eV -101.108965 H MutD_17_60.log  |           |           |           |
| 6                                                             | 1.965420  | -1.805670 | 1.446488  |
| 6                                                             | -3.109800 | -0.326246 | 0.009587  |
| 6                                                             | 1.262109  | -2.283459 | 0.518978  |
| 6                                                             | 1.788405  | 0.467862  | -1.043056 |
| 6                                                             | -1.809849 | 0.887091  | 1.678852  |
| 6                                                             | 0.818429  | 2.929410  | -1.660829 |
| 6                                                             | -0.943536 | 0.495781  | -0.662846 |
| 12                                                            | 2.352559  | 0.136853  | 1.070341  |
| 12                                                            | 0.365466  | -1.086341 | -1.595446 |
| 8                                                             | -4.079712 | -0.890993 | -0.271126 |
| 6                                                             | 0.530067  | 1.567977  | 1.184773  |
| 6                                                             | -1.980565 | 0.368679  | 0.332135  |
| 6                                                             | 1.207589  | 1.704216  | -1.285840 |
| 8                                                             | 0.540264  | -2.655194 | -0.512738 |
| 6                                                             | -0.657432 | 1.430408  | 1.791411  |
| 6                                                             | 0.212375  | 1.191176  | -0.214292 |
| 16                                                            |           |           |           |
| 172.467246 Kcal/mol 7.478897 eV -101.108836 H MutD_18_56.log  |           |           |           |
| 6                                                             | 1.955976  | -1.874540 | 1.395152  |
| 6                                                             | -1.973051 | 0.381845  | 0.358411  |
| 6                                                             | 0.555107  | 1.517742  | 1.229864  |
| 6                                                             | 1.217792  | 1.719948  | -1.240325 |
| 6                                                             | -1.787044 | 0.838366  | 1.725196  |
| 12                                                            | 2.366937  | 0.070904  | 1.059123  |
| 6                                                             | 0.224590  | 1.200339  | -0.180627 |
| 6                                                             | -0.623371 | 1.357865  | 1.844119  |
| 6                                                             | 1.785127  | 0.464601  | -1.036229 |
| 6                                                             | 1.218194  | -2.304226 | 0.470061  |
| 6                                                             | -3.116139 | -0.273895 | 0.002719  |
| 6                                                             | -0.942753 | 0.532236  | -0.640023 |
| 6                                                             | 0.939987  | 2.964086  | -1.652113 |
| 8                                                             | 0.464375  | -2.629767 | -0.553956 |
| 12                                                            | 0.327208  | -1.045935 | -1.619963 |
| 8                                                             | -4.096406 | -0.800963 | -0.311938 |
| 16                                                            |           |           |           |
| 172.953158 Kcal/mol 7.499968 eV -101.108062 H Child_12_21.log |           |           |           |
| 6                                                             | 2.833754  | 0.811153  | 0.216749  |
| 6                                                             | -6.424133 | -0.961337 | 0.262213  |
| 6                                                             | 3.346158  | -0.287890 | 0.606469  |
| 8                                                             | -5.341581 | -0.572401 | 0.222997  |
| 6                                                             | 1.987938  | 1.790106  | -0.020815 |
| 6                                                             | -1.940925 | -1.537331 | -0.182820 |
| 8                                                             | 5.795167  | 0.190218  | 0.438194  |
| 6                                                             | -0.782498 | -2.078616 | -0.312018 |
| 6                                                             | 0.902458  | 2.473457  | -0.234742 |
| 12                                                            | -3.289973 | -0.018340 | 0.024041  |
| 6                                                             | -0.355835 | 2.667608  | -0.274510 |
| 6                                                             | 0.424492  | -2.446688 | -0.126366 |
| 6                                                             | 5.608942  | -0.454655 | -0.423552 |
| 6                                                             | -2.781911 | 1.972687  | 0.080858  |
| 6                                                             | -1.678111 | 2.481681  | -0.212933 |

|                                                              |           |           |           |
|--------------------------------------------------------------|-----------|-----------|-----------|
| 12                                                           | 2.417418  | -1.941959 | -0.154102 |
| 16                                                           |           |           |           |
| 173.046102 Kcal/mol 7.503999 eV -101.107914 H MutI_8_71.log  |           |           |           |
| 6                                                            | -2.963308 | -1.114446 | 0.013567  |
| 12                                                           | 2.743834  | -0.220169 | 0.491117  |
| 6                                                            | -0.579947 | -1.350718 | -0.005535 |
| 6                                                            | -4.216457 | -0.649238 | 0.330096  |
| 6                                                            | 0.810513  | -1.346826 | -0.183044 |
| 6                                                            | 0.746602  | 0.578800  | 1.431587  |
| 6                                                            | 1.756637  | 1.137057  | 1.955064  |
| 6                                                            | -3.089866 | 0.327735  | -0.016619 |
| 6                                                            | -1.525890 | 2.289253  | -0.561944 |
| 6                                                            | -2.414526 | 1.394563  | -0.270641 |
| 6                                                            | -1.881735 | -2.007651 | -0.204486 |
| 8                                                            | -1.920885 | -3.213977 | -0.556340 |
| 6                                                            | 0.133105  | -0.373489 | 0.653505  |
| 12                                                           | 5.121451  | -1.133703 | -0.874970 |
| 8                                                            | 0.446651  | 3.763652  | -0.759475 |
| 6                                                            | -0.540055 | 3.089801  | -0.619422 |
| 16                                                           |           |           |           |
| 173.085454 Kcal/mol 7.505705 eV -101.107851 H Child_6_11.log |           |           |           |
| 12                                                           | 3.422207  | 1.630415  | 0.622736  |
| 8                                                            | -5.751250 | 0.968405  | -0.475084 |
| 6                                                            | 3.190451  | -0.760837 | -0.423088 |
| 6                                                            | -5.594807 | -0.093239 | -0.051819 |
| 6                                                            | 1.754436  | 2.768200  | 0.292078  |
| 6                                                            | -2.364144 | -0.441047 | 2.346115  |
| 6                                                            | 3.969620  | -0.328193 | 0.481659  |
| 6                                                            | -1.711961 | -0.025328 | 1.321816  |
| 12                                                           | 1.342118  | -1.343858 | -1.078217 |
| 6                                                            | -1.012429 | 0.393669  | 0.260082  |
| 6                                                            | 0.604679  | 2.375884  | -0.009908 |
| 8                                                            | 0.666047  | -3.212067 | -0.022106 |
| 6                                                            | -0.666780 | 1.012250  | -1.794070 |
| 6                                                            | -0.072721 | -3.894505 | 0.532812  |
| 6                                                            | -0.388685 | -0.151303 | -0.964333 |
| 6                                                            | -0.456035 | 1.562883  | -0.417461 |
| 16                                                           |           |           |           |
| 173.205065 Kcal/mol 7.510892 eV -101.107661 H MutD_17_74.log |           |           |           |
| 6                                                            | -1.341361 | 0.136298  | 3.025534  |
| 6                                                            | -1.626544 | 0.044672  | 1.627181  |
| 8                                                            | -1.354803 | -1.502948 | -1.513393 |
| 6                                                            | -0.272724 | 0.165316  | 2.057600  |
| 6                                                            | -3.476023 | 1.099839  | -0.855689 |
| 6                                                            | 2.383615  | -1.412454 | 0.642357  |
| 6                                                            | 2.113741  | 0.898333  | -0.444391 |
| 12                                                           | 3.607453  | 2.220146  | -1.070922 |
| 8                                                            | -4.564033 | 1.437382  | -0.775573 |
| 6                                                            | 0.713650  | 1.025813  | -0.079190 |
| 12                                                           | -1.359873 | 0.230272  | -0.501152 |
| 6                                                            | 1.701028  | -2.266203 | 0.027827  |
| 6                                                            | -0.377465 | -2.211624 | -1.156667 |
| 6                                                            | 2.086860  | -0.041875 | 0.744376  |
| 6                                                            | 0.656529  | -2.728781 | -0.682982 |
| 6                                                            | 0.835317  | 0.477252  | 1.290146  |

16  
173.272512 Kcal/mol 7.513817 eV -101.107553 H MutI\_15\_55.log  
6 -3.584989 1.289322 0.697905  
6 -1.764774 -0.123151 -0.039740  
8 0.749671 0.006480 -0.575991  
12 1.295423 1.886902 -0.530600  
6 -0.898253 -1.919766 -0.751672  
8 4.370572 -1.654702 1.281619  
6 -0.361831 2.948320 -0.012494  
6 -4.795040 1.256835 1.120096  
12 -1.800949 -3.711208 -0.188891  
6 3.459771 1.346220 -0.568761  
6 4.150729 0.420590 -0.053636  
6 -0.415745 -0.580578 -0.473635  
6 -2.242607 -1.493049 -0.277968  
6 -1.382688 2.253776 0.014258  
6 -2.314633 1.152603 0.201943  
6 4.334121 -0.704877 0.641846  
16  
173.705853 Kcal/mol 7.532608 eV -101.106862 H Child\_6\_54.log  
12 -4.534459 -1.537800 -0.195735  
8 8.324606 -0.082820 -0.011879  
6 -5.194522 0.336854 -0.123962  
6 7.198563 0.283377 -0.039777  
6 -2.969291 -2.816998 -0.059252  
6 5.983779 0.644204 -0.048135  
6 -5.281401 1.587029 -0.042874  
6 4.741404 0.949396 -0.104155  
6 -1.894374 -3.449768 0.119305  
6 3.487393 1.194498 -0.104618  
6 -5.317182 2.910122 0.052522  
6 2.218862 1.022184 0.015752  
6 -5.206237 4.188285 0.138089  
6 0.923962 0.757581 0.137722  
12 -0.510605 -2.004137 0.203562  
8 0.224772 -0.309348 0.044676  
16  
173.880940 Kcal/mol 7.540201 eV -101.106583 H Child\_15\_24.log  
6 -7.521588 1.202271 0.288573  
12 2.601213 -1.751916 0.756611  
6 -6.293508 0.800798 0.247950  
8 0.902718 -1.275014 0.132709  
6 -5.051461 0.419146 0.191459  
6 3.653177 -0.067360 0.510162  
6 -3.825473 0.100268 0.080587  
6 -0.385964 -1.579901 -0.368512  
6 5.762573 1.701472 -0.101182  
6 3.202493 1.026091 -0.120048  
8 2.169992 1.685527 -0.570524  
6 4.644459 1.047948 0.095549  
6 -1.320292 -0.483862 -0.113426  
6 -2.595080 -0.286946 -0.009509  
6 -0.755655 -2.370821 -1.387985  
12 0.593473 0.723689 -0.121545  
16

174.097429 Kcal/mol 7.549589 eV -101.106238 H Child\_5\_40.log  
8 -1.167181 2.980293 0.533353  
12 -1.286400 -5.022834 -1.421090  
6 2.325772 1.174079 1.780161  
6 3.034716 -1.094534 -0.832844  
6 1.363377 1.400616 1.017782  
6 1.896794 -0.461134 -1.209749  
6 -0.692853 2.097299 -0.260705  
6 -4.693345 -0.831191 2.480081  
6 0.492078 1.323845 -0.095780  
6 -2.977641 1.662684 -3.487396  
12 3.846148 -0.162483 1.520610  
6 4.026271 -1.409293 -0.123481  
6 -1.419148 1.855215 -1.435712  
6 -2.212232 1.787360 -2.427990  
6 0.990752 0.360708 -1.000954  
8 -4.273348 -1.101557 3.514806

16

174.128539 Kcal/mol 7.550938 eV -101.106189 H Child\_1\_51.log  
12 4.841213 -0.031203 -1.259314  
8 -1.489801 -3.364136 -0.057482  
8 -0.806324 3.486696 -0.683033  
6 2.296245 -0.574739 -0.193000  
6 -1.397353 -2.163276 -0.215047  
6 2.226914 0.837027 2.073081  
6 -2.346629 -1.016907 -0.383947  
6 2.516944 0.086855 1.013184  
6 -3.563835 -0.270446 -0.195461  
6 -1.329291 2.468138 -0.477795  
6 -0.204381 -1.125200 -0.149399  
6 -1.297864 -0.089747 -0.367954  
6 -1.924828 1.285348 -0.231270  
6 1.141300 -1.096567 -0.469385  
6 -3.345056 0.981394 -0.199763  
12 0.303455 0.288557 1.651369

16

174.273520 Kcal/mol 7.557225 eV -101.105958 H Child\_3\_38.log  
8 1.906311 2.191634 0.073515  
8 -4.801668 -3.115767 0.079808  
6 2.927610 1.429089 0.082876  
6 -4.632105 -1.931086 0.057357  
12 0.183680 2.760039 -0.039038  
12 -5.528864 0.058570 0.220408  
6 3.859422 0.634123 0.069425  
6 -3.252938 -1.054984 -0.164957  
6 7.872321 -2.678983 0.016594  
6 4.926007 -0.194516 0.047905  
6 -3.477985 0.349572 -0.087526  
6 -1.736138 2.300300 -0.116673  
6 -2.195658 -1.834799 -0.338536  
6 5.890168 -0.970562 0.009786  
6 6.924870 -1.804381 -0.004934  
6 -2.554729 1.351186 -0.138488

16

174.779958 Kcal/mol 7.579186 eV -101.105151 H Child\_5\_62.log

|    |                                                              |           |           |
|----|--------------------------------------------------------------|-----------|-----------|
| 6  | -3.628175                                                    | 0.511965  | -0.356071 |
| 6  | 3.935889                                                     | -2.257431 | 0.064866  |
| 6  | -2.683657                                                    | 1.154030  | 0.159810  |
| 8  | 2.952275                                                     | -1.656602 | -0.031377 |
| 6  | 0.208691                                                     | 0.551269  | 2.338469  |
| 6  | 2.617514                                                     | 2.508246  | -2.297455 |
| 12 | -3.505824                                                    | -1.643324 | -0.628018 |
| 6  | 1.701593                                                     | 2.027951  | -1.506077 |
| 6  | -1.047402                                                    | -2.030580 | -1.338252 |
| 12 | 1.230168                                                     | -0.543978 | 0.319470  |
| 6  | -1.506568                                                    | 1.636187  | 0.634623  |
| 6  | 0.893248                                                     | 1.513885  | -0.580444 |
| 6  | 1.029266                                                     | -0.394377 | 2.520838  |
| 6  | -0.147729                                                    | 1.912565  | 0.258430  |
| 6  | -0.478533                                                    | 1.469647  | 1.561576  |
| 8  | -0.209394                                                    | -1.514963 | -0.601036 |
| 16 | 174.972933 Kcal/mol 7.587554 eV -101.104843 H MutD_18_48.log |           |           |
| 6  | -1.603508                                                    | 1.112984  | -0.056545 |
| 6  | -0.184247                                                    | -2.351054 | 0.631447  |
| 12 | 1.913758                                                     | -0.675084 | 1.483620  |
| 6  | -2.858247                                                    | 0.616183  | -0.276582 |
| 6  | 0.988629                                                     | 1.450347  | 1.154153  |
| 6  | 2.474971                                                     | 2.104871  | -1.654511 |
| 8  | -0.723880                                                    | -2.559188 | -0.550039 |
| 6  | -0.460732                                                    | 0.795900  | -0.875143 |
| 6  | -1.463805                                                    | 1.717912  | 1.256682  |
| 12 | 0.199440                                                     | -1.216095 | -1.578855 |
| 6  | 0.789451                                                     | 1.089433  | -0.265681 |
| 8  | -3.927000                                                    | 0.168820  | -0.304780 |
| 6  | 2.080649                                                     | 0.955875  | -1.099937 |
| 6  | 2.018946                                                     | -0.383339 | -0.697351 |
| 6  | -0.220938                                                    | 1.865311  | 1.533678  |
| 6  | 0.413608                                                     | -2.004906 | 1.680018  |
| 16 | 175.063689 Kcal/mol 7.591490 eV -101.104699 H Child_1_35.log |           |           |
| 8  | -2.855788                                                    | 2.217515  | 1.096561  |
| 6  | 5.888242                                                     | -1.698352 | 0.057130  |
| 6  | -4.807032                                                    | -0.759960 | -0.905724 |
| 6  | 4.744302                                                     | -1.098983 | -0.023558 |
| 6  | -2.137724                                                    | 1.605946  | 0.273701  |
| 8  | -1.374392                                                    | -2.803589 | 0.341162  |
| 6  | -3.670654                                                    | -0.221838 | -0.569180 |
| 6  | 3.582120                                                     | -0.500660 | -0.077672 |
| 6  | -2.448628                                                    | 0.221782  | -0.278127 |
| 6  | -2.112381                                                    | -3.468347 | 1.031128  |
| 6  | -0.824567                                                    | 1.925199  | -0.183732 |
| 6  | 2.501895                                                     | 0.198392  | -0.092770 |
| 6  | 0.346461                                                     | 1.394937  | -0.217611 |
| 12 | 2.385052                                                     | 2.432120  | 0.077451  |
| 12 | -0.655035                                                    | -0.953581 | -0.421141 |
| 6  | 1.118172                                                     | 0.226239  | -0.243165 |
| 16 | 175.356505 Kcal/mol 7.604187 eV -101.104232 H MutI_17_79.log |           |           |
| 12 | -4.747986                                                    | 0.088252  | 0.617022  |

|    |           |           |           |
|----|-----------|-----------|-----------|
| 6  | -3.270390 | 2.474944  | 0.219474  |
| 6  | 5.573905  | 0.618792  | -0.238943 |
| 6  | -0.022753 | -1.561688 | 0.107521  |
| 12 | -3.208038 | -1.613886 | -0.959270 |
| 8  | 2.266475  | -2.158911 | 0.728145  |
| 6  | 1.155955  | -1.992834 | 0.413364  |
| 6  | 6.632162  | -0.045923 | -0.370100 |
| 6  | -1.798467 | -0.386525 | -0.103631 |
| 6  | 0.508736  | 0.907352  | 0.023616  |
| 6  | 1.758412  | 1.197268  | 0.046702  |
| 6  | 3.055071  | 1.337143  | 0.097248  |
| 6  | 4.327340  | 1.044367  | -0.021908 |
| 6  | -1.407263 | -1.800352 | -0.179335 |
| 6  | -0.395380 | -0.079520 | 0.058783  |
| 8  | -2.420434 | 3.162593  | -0.254366 |

16

175.514942 Kcal/mol 7.611058 eV -101.103980 H Child\_6\_43.log

|    |           |           |           |
|----|-----------|-----------|-----------|
| 6  | -3.753531 | 3.585105  | 1.676401  |
| 6  | 11.013821 | -0.164728 | 1.900715  |
| 6  | -3.188043 | 2.541679  | 1.186818  |
| 8  | 10.813366 | -0.106464 | 0.770352  |
| 6  | -2.613039 | 1.424452  | 0.695083  |
| 12 | 1.069612  | -0.457642 | -2.275747 |
| 6  | -3.079775 | 0.139243  | 1.006297  |
| 6  | 1.315658  | 1.668650  | -2.262341 |
| 6  | -3.416838 | -1.015920 | 1.256774  |
| 6  | 0.347134  | 1.457196  | -1.491704 |
| 6  | -3.412983 | -2.379215 | 1.193330  |
| 6  | -0.656443 | -0.707027 | -0.972913 |
| 6  | -3.097640 | -3.559196 | 0.853343  |
| 6  | -0.658371 | 0.653430  | -0.821580 |
| 12 | -1.674820 | -2.343160 | -0.284518 |
| 8  | -1.505515 | 1.574916  | -0.095122 |

16

176.115208 Kcal/mol 7.637088 eV -101.103023 H Original3D\_9\_6.log

|    |           |           |           |
|----|-----------|-----------|-----------|
| 6  | 0.043359  | 2.080480  | 0.641072  |
| 8  | -1.175378 | 2.515348  | 0.560807  |
| 12 | -2.669966 | 1.676203  | -0.135191 |
| 6  | 2.271270  | 0.770689  | 0.524495  |
| 8  | -2.681370 | -2.168854 | 1.375922  |
| 6  | -1.410813 | -2.120140 | 0.562096  |
| 6  | 4.633284  | -0.262676 | 0.170974  |
| 6  | -1.688709 | -0.109838 | -1.444685 |
| 6  | 3.459702  | 0.319353  | 0.426510  |
| 6  | 1.124554  | 1.495456  | 0.667242  |
| 6  | -0.155890 | -2.051174 | 0.231137  |
| 12 | 1.219493  | -0.624293 | -0.792850 |
| 6  | -0.515076 | -0.046159 | -1.866772 |
| 6  | 5.699875  | -0.869710 | -0.191489 |
| 6  | -2.815281 | -0.356070 | -0.607566 |
| 6  | -2.602999 | -1.416024 | 0.160764  |

16

176.199737 Kcal/mol 7.640753 eV -101.102888 H Child\_3\_39.log

|   |           |           |           |
|---|-----------|-----------|-----------|
| 6 | -7.345591 | -2.104123 | 0.627606  |
| 6 | 2.069065  | -1.644735 | -2.653375 |

|                                                                   |           |           |           |
|-------------------------------------------------------------------|-----------|-----------|-----------|
| 6                                                                 | -6.431473 | -1.193661 | 0.440222  |
| 6                                                                 | 4.201320  | 0.606260  | 0.626496  |
| 6                                                                 | -5.493143 | -0.322498 | 0.276233  |
| 6                                                                 | 1.942940  | -2.270269 | -1.539857 |
| 6                                                                 | -4.507970 | 0.498221  | 0.112185  |
| 8                                                                 | 2.491655  | 2.325842  | -0.093064 |
| 6                                                                 | -3.513551 | 1.265149  | -0.032696 |
| 6                                                                 | 3.387111  | 1.469671  | 0.262238  |
| 6                                                                 | -2.374613 | 1.926916  | -0.155946 |
| 6                                                                 | 1.778130  | -2.887768 | -0.411684 |
| 6                                                                 | -1.261484 | 2.499619  | -0.253562 |
| 8                                                                 | 1.585270  | -3.430064 | 0.611401  |
| 12                                                                | 0.730882  | 2.705984  | -0.289403 |
| 12                                                                | 5.325799  | -0.891227 | 1.294915  |
| 16                                                                |           |           |           |
| 176.331758 Kcal/mol 7.646478 eV -101.102678 H Child_11_45.log     |           |           |           |
| 6                                                                 | 3.673722  | 2.676344  | -0.050261 |
| 8                                                                 | -6.276851 | 2.127198  | 0.461567  |
| 6                                                                 | 3.390451  | 1.407197  | 0.090122  |
| 6                                                                 | -5.207585 | 1.636980  | 0.208585  |
| 6                                                                 | 3.069573  | 0.200363  | 0.221393  |
| 6                                                                 | -4.077767 | 1.112683  | -0.040013 |
| 6                                                                 | 3.734428  | 3.983100  | -0.079438 |
| 6                                                                 | -2.898917 | 0.600048  | -0.314963 |
| 6                                                                 | 3.392611  | 5.244187  | -0.072978 |
| 6                                                                 | -2.036368 | -0.527086 | -0.372816 |
| 12                                                                | 2.492479  | -2.806919 | 0.054238  |
| 12                                                                | -1.494683 | -2.453225 | -0.022385 |
| 6                                                                 | 1.191290  | -4.291913 | -0.120153 |
| 6                                                                 | 0.029317  | -3.803217 | 0.052635  |
| 6                                                                 | -1.494230 | 0.707147  | -0.763473 |
| 8                                                                 | 2.705264  | -0.946357 | 0.421672  |
| 16                                                                |           |           |           |
| 176.736165 Kcal/mol 7.664015 eV -101.102033 H Original2D_9_2.log  |           |           |           |
| 6                                                                 | 0.000000  | -0.836897 | 0.000000  |
| 6                                                                 | -2.425843 | -0.546482 | 0.000000  |
| 6                                                                 | 1.384913  | -1.157870 | 0.000000  |
| 6                                                                 | -3.375204 | 1.785708  | -0.000000 |
| 6                                                                 | -0.883606 | 1.577527  | -0.000000 |
| 6                                                                 | -1.036660 | 0.107857  | -0.000000 |
| 6                                                                 | 3.035267  | 2.277162  | -0.000000 |
| 12                                                                | 3.267461  | -0.398138 | 0.000000  |
| 6                                                                 | -2.094389 | 2.107117  | -0.000000 |
| 12                                                                | 1.060839  | 2.470296  | -0.000000 |
| 6                                                                 | -0.344413 | -2.207967 | 0.000000  |
| 6                                                                 | -3.334974 | 0.504787  | -0.000000 |
| 6                                                                 | -2.757553 | -1.937118 | 0.000000  |
| 6                                                                 | 4.025369  | 1.495892  | -0.000000 |
| 8                                                                 | 0.886646  | -2.741706 | 0.000000  |
| 8                                                                 | -1.523779 | -2.743820 | 0.000000  |
| 16                                                                |           |           |           |
| 176.739201 Kcal/mol 7.664147 eV -101.102029 H Original3D_0_42.log |           |           |           |
| 6                                                                 | 3.824788  | -0.316416 | 0.667040  |
| 8                                                                 | 4.746636  | -0.783540 | 1.166217  |
| 12                                                                | 1.860272  | 0.381322  | -0.347267 |



|                                                                   |           |           |           |
|-------------------------------------------------------------------|-----------|-----------|-----------|
| 12                                                                | -0.555022 | -3.513758 | -0.677456 |
| 6                                                                 | -5.208628 | 0.940234  | 1.114202  |
| 6                                                                 | -3.128157 | -0.283419 | 0.225906  |
| 6                                                                 | -4.243181 | 0.105220  | 0.786324  |
| 8                                                                 | 0.736482  | 0.652382  | 1.382499  |
| 6                                                                 | 0.531485  | -1.216104 | -0.957802 |
| 6                                                                 | 2.037816  | 2.424592  | -1.144117 |
| 6                                                                 | -0.691020 | -1.016008 | -0.691011 |
| 6                                                                 | -1.897404 | -0.177353 | -0.344315 |
| 6                                                                 | -0.489254 | 1.824575  | -1.158832 |
| 6                                                                 | 0.779554  | 2.343174  | -1.303367 |
| 6                                                                 | -1.451567 | 1.109484  | -0.842579 |
| 6                                                                 | 0.014245  | 0.701772  | 2.299710  |
| 16                                                                |           |           |           |
| 177.161531 Kcal/mol 7.682461 eV -101.101356 H Child_13_27.log     |           |           |           |
| 8                                                                 | 8.290573  | 0.174187  | -0.483523 |
| 12                                                                | -5.022320 | 1.524439  | 0.461689  |
| 6                                                                 | 7.091851  | -0.000413 | -0.202707 |
| 6                                                                 | -3.300897 | -0.101254 | 0.142343  |
| 6                                                                 | 5.877365  | -0.245740 | 0.090485  |
| 6                                                                 | -4.369922 | -0.472778 | -0.412898 |
| 6                                                                 | 4.597562  | -0.052784 | 0.194881  |
| 6                                                                 | -6.713603 | 0.514998  | -0.605552 |
| 6                                                                 | 3.337134  | 0.127620  | 0.245638  |
| 6                                                                 | 0.017216  | 1.965188  | -0.071054 |
| 6                                                                 | 2.035775  | 0.340318  | 0.221567  |
| 6                                                                 | -5.700691 | -0.246942 | -0.748699 |
| 12                                                                | -0.312839 | -0.207874 | 0.160693  |
| 6                                                                 | 1.156291  | 1.400489  | 0.085734  |
| 6                                                                 | -1.583898 | -2.049910 | 0.059729  |
| 8                                                                 | -2.120972 | -3.033130 | 0.300348  |
| 16                                                                |           |           |           |
| 178.141578 Kcal/mol 7.724960 eV -101.099794 H Original2D_0_20.log |           |           |           |
| 6                                                                 | 0.000000  | 0.580957  | 0.000000  |
| 6                                                                 | -1.365683 | 1.021986  | -0.000000 |
| 6                                                                 | -2.288766 | -1.360709 | -0.000000 |
| 6                                                                 | 0.579588  | -0.683582 | 0.000000  |
| 12                                                                | 1.135974  | 2.417510  | 0.000000  |
| 6                                                                 | -1.415950 | 2.423762  | -0.000000 |
| 6                                                                 | 3.054321  | 0.031222  | 0.000000  |
| 6                                                                 | 3.961928  | 1.289518  | 0.000000  |
| 6                                                                 | -2.424525 | 0.086691  | -0.000000 |
| 8                                                                 | 0.087848  | -1.985462 | -0.000000 |
| 6                                                                 | -0.866296 | 3.565321  | 0.000000  |
| 6                                                                 | -1.357732 | -2.264813 | -0.000000 |
| 8                                                                 | 3.065421  | 2.261011  | 0.000000  |
| 6                                                                 | 1.998676  | -0.609497 | 0.000000  |
| 12                                                                | -1.371126 | -4.351002 | -0.000000 |
| 6                                                                 | -3.609615 | -0.581271 | -0.000000 |
| 16                                                                |           |           |           |
| 178.343798 Kcal/mol 7.733729 eV -101.099471 H Child_8_20.log      |           |           |           |
| 6                                                                 | -1.893982 | 3.132983  | 0.099410  |
| 6                                                                 | 3.635552  | -0.760592 | -0.092105 |
| 6                                                                 | -1.733107 | 1.808076  | 0.048041  |
| 8                                                                 | 2.969913  | -1.855072 | 0.025721  |

|    |           |           |           |
|----|-----------|-----------|-----------|
| 8  | -3.253458 | -1.646506 | -0.180793 |
| 6  | 4.278768  | 0.317573  | -0.206484 |
| 6  | -2.868097 | 0.917709  | -0.055410 |
| 6  | -3.398516 | -0.315957 | -0.139455 |
| 12 | 3.091127  | 1.874284  | -0.112960 |
| 6  | -0.350437 | 1.391322  | 0.111785  |
| 12 | 1.070869  | -1.832218 | 0.192005  |
| 6  | 1.001027  | 1.696846  | 0.092612  |
| 6  | -0.838433 | -2.524536 | 0.058738  |
| 6  | -4.321692 | 0.754219  | 0.002757  |
| 6  | -2.005435 | -2.157282 | -0.076366 |
| 6  | 0.548418  | 0.324278  | 0.205149  |

16

178.457553 Kcal/mol 7.738662 eV -101.099290 H Child\_3\_62.log

|    |           |           |           |
|----|-----------|-----------|-----------|
| 8  | 5.033077  | 1.071086  | -0.506619 |
| 8  | -4.370866 | 0.032970  | -1.119778 |
| 6  | 3.333088  | -0.516068 | 0.237686  |
| 12 | -4.334890 | 1.388922  | 0.689886  |
| 6  | 3.894744  | 0.784034  | -0.277897 |
| 6  | -3.242826 | -0.361753 | -0.684246 |
| 6  | 2.551210  | -1.574997 | -0.302663 |
| 6  | -2.170583 | 0.230044  | 0.061016  |
| 6  | 1.967564  | -0.290861 | 0.811939  |
| 6  | -2.345462 | -1.264374 | -0.085362 |
| 6  | 2.618002  | 1.526948  | -0.442233 |
| 6  | -1.030350 | 1.006894  | 0.134677  |
| 6  | 1.418664  | -1.580066 | 0.682451  |
| 12 | -0.464637 | -2.262693 | 0.080362  |
| 6  | 0.172956  | 1.267874  | 0.237609  |
| 6  | 1.549097  | 1.047793  | 0.255055  |

16

178.472908 Kcal/mol 7.739328 eV -101.099266 H Child\_4\_8.log

|    |           |           |           |
|----|-----------|-----------|-----------|
| 6  | 5.286007  | -0.015148 | 0.809276  |
| 6  | -6.669036 | 0.045438  | 0.193302  |
| 6  | 5.272568  | 1.295697  | 0.427451  |
| 6  | -4.021376 | 0.181322  | 0.243126  |
| 6  | 4.752456  | -1.131063 | 0.855949  |
| 6  | -1.704268 | -0.657145 | -0.448307 |
| 12 | 2.939145  | 1.764665  | -0.647494 |
| 6  | -5.395192 | 0.299850  | 0.367843  |
| 6  | 4.887238  | 2.397536  | -0.055106 |
| 6  | -7.918993 | -0.230789 | 0.016564  |
| 6  | 3.754754  | -1.994590 | 0.525616  |
| 6  | -2.848874 | -0.298427 | -0.095101 |
| 6  | 2.669572  | -2.386225 | 0.028335  |
| 8  | -0.573870 | -0.960817 | -0.777143 |
| 12 | 1.424461  | -0.873189 | -0.693988 |
| 8  | -4.520181 | 1.493758  | 0.637655  |

16

178.608585 Kcal/mol 7.745211 eV -101.099049 H Original3D\_0\_75.log

|    |           |           |           |
|----|-----------|-----------|-----------|
| 6  | 1.319080  | -1.489431 | 0.139634  |
| 6  | 2.534964  | -1.198724 | -0.216545 |
| 8  | -3.107219 | 2.540525  | -0.631026 |
| 12 | -0.048082 | -3.215699 | -0.446164 |
| 8  | 3.671517  | -1.033393 | -0.508988 |

|                                                               |           |           |           |
|---------------------------------------------------------------|-----------|-----------|-----------|
| 6                                                             | -1.926407 | 2.113010  | -0.443495 |
| 6                                                             | 0.372721  | 0.916908  | 0.198129  |
| 6                                                             | -0.964045 | -1.045276 | 0.744124  |
| 6                                                             | 0.343917  | -0.541828 | 0.453189  |
| 6                                                             | 3.630239  | 3.076789  | 0.272675  |
| 6                                                             | -0.874775 | 1.499328  | -0.137202 |
| 12                                                            | -2.831779 | -0.046479 | -0.175045 |
| 6                                                             | 1.525490  | 1.599996  | 0.153274  |
| 6                                                             | -1.694315 | -1.896359 | -0.239634 |
| 6                                                             | 2.628017  | 2.259990  | 0.124299  |
| 6                                                             | -1.887561 | -0.779557 | 1.713989  |
| 16                                                            |           |           |           |
| 179.454079 Kcal/mol 7.781875 eV -101.097702 H Child_16_17.log |           |           |           |
| 12                                                            | 2.899641  | 4.280841  | -0.235027 |
| 6                                                             | -0.799887 | -2.987242 | -0.251247 |
| 6                                                             | 4.739282  | -3.006766 | 0.698413  |
| 6                                                             | -5.199601 | 0.255721  | -0.583907 |
| 6                                                             | 2.272031  | 1.036160  | -0.069032 |
| 6                                                             | -3.940710 | -0.228735 | -0.436347 |
| 6                                                             | 3.807957  | -2.125329 | 0.448863  |
| 12                                                            | -2.039864 | -1.080192 | -0.517959 |
| 6                                                             | 1.940894  | -0.345144 | -0.015733 |
| 6                                                             | 0.094205  | -2.098173 | -0.177819 |
| 6                                                             | 2.505577  | 2.247159  | -0.116345 |
| 6                                                             | -4.464522 | 0.796906  | 0.534595  |
| 8                                                             | -4.232353 | 1.461090  | 1.516770  |
| 6                                                             | 0.571845  | -0.762624 | -0.204867 |
| 6                                                             | 2.886482  | -1.273707 | 0.217236  |
| 8                                                             | -0.367478 | 0.106766  | -0.420148 |
| 16                                                            |           |           |           |
| 179.576694 Kcal/mol 7.787192 eV -101.097507 H Child_10_37.log |           |           |           |
| 6                                                             | 3.241122  | -1.259099 | 1.229634  |
| 8                                                             | -6.097252 | 1.663369  | 0.158560  |
| 6                                                             | 3.243280  | 0.049945  | 0.942517  |
| 6                                                             | -2.621267 | -1.846441 | 0.979255  |
| 6                                                             | 2.502274  | -2.240973 | 0.830510  |
| 6                                                             | -5.093576 | 0.994154  | 0.178817  |
| 6                                                             | 2.482430  | 0.256683  | -0.274994 |
| 6                                                             | -3.153849 | -0.653593 | 0.299113  |
| 6                                                             | 1.638111  | -2.010545 | -0.212161 |
| 6                                                             | -3.989250 | 0.309398  | 0.167682  |
| 6                                                             | 2.378464  | 1.664843  | -0.736253 |
| 6                                                             | -1.945502 | -1.452251 | -0.160734 |
| 6                                                             | 1.640499  | -0.737527 | -0.839001 |
| 12                                                            | -0.236400 | -1.435072 | -1.347019 |
| 8                                                             | 2.419206  | 2.093216  | -1.870933 |
| 12                                                            | 2.527064  | 2.393386  | 1.286409  |
| 16                                                            |           |           |           |
| 180.254205 Kcal/mol 7.816572 eV -101.096427 H Child_2_13.log  |           |           |           |
| 6                                                             | -2.350282 | 3.910338  | 0.717812  |
| 12                                                            | 3.708994  | -2.742959 | 0.632654  |
| 6                                                             | -1.491332 | 2.989943  | 0.471822  |
| 6                                                             | 2.852496  | -0.890730 | 0.355466  |
| 6                                                             | 0.664159  | 2.308934  | -0.447845 |
| 6                                                             | 1.544249  | -0.661929 | 0.578155  |

|                                                                   |           |           |           |
|-------------------------------------------------------------------|-----------|-----------|-----------|
| 6                                                                 | 1.767492  | 2.415647  | -1.020790 |
| 6                                                                 | 0.384087  | -0.167293 | 0.717219  |
| 6                                                                 | -0.556411 | 2.048229  | 0.218827  |
| 6                                                                 | -3.463720 | -2.412059 | -0.271963 |
| 6                                                                 | -4.234124 | -3.090061 | 0.512594  |
| 8                                                                 | -1.936090 | 0.202373  | 0.984306  |
| 6                                                                 | -0.781807 | 0.596774  | 0.680265  |
| 6                                                                 | -2.636930 | -1.760610 | -1.028944 |
| 8                                                                 | -1.885235 | -1.243257 | -1.763994 |
| 12                                                                | 2.989617  | 0.793291  | -0.854170 |
| 16                                                                |           |           |           |
| 180.305138 Kcal/mol 7.818781 eV -101.096346 H Original3D_0_79.log |           |           |           |
| 6                                                                 | -1.014544 | 0.907040  | 0.961795  |
| 6                                                                 | -0.612521 | 0.227602  | -1.540662 |
| 8                                                                 | 1.091734  | 2.048010  | 1.057559  |
| 6                                                                 | 0.515329  | 0.398441  | -0.745910 |
| 6                                                                 | 1.568398  | -0.526025 | -0.545611 |
| 6                                                                 | -2.524032 | -1.550211 | 0.280322  |
| 8                                                                 | 2.817971  | -0.264854 | -0.426003 |
| 6                                                                 | -1.727698 | -0.455742 | 1.034837  |
| 6                                                                 | 0.947278  | -1.726365 | -0.067856 |
| 12                                                                | 4.650589  | 0.169348  | 0.010929  |
| 6                                                                 | 0.268027  | 1.296050  | 0.433454  |
| 6                                                                 | 0.008227  | -2.294488 | 0.487358  |
| 12                                                                | -3.308727 | 0.693513  | -0.656891 |
| 6                                                                 | -1.735458 | 0.534893  | -1.990514 |
| 6                                                                 | -1.278916 | -1.812961 | 0.795644  |
| 6                                                                 | -2.310753 | 0.898502  | 1.346990  |
| 16                                                                |           |           |           |
| 180.307565 Kcal/mol 7.818886 eV -101.096342 H MutI_14_75.log      |           |           |           |
| 6                                                                 | -0.515444 | -1.006475 | -1.079861 |
| 6                                                                 | 2.118873  | -2.551574 | 0.821511  |
| 6                                                                 | -1.327617 | 2.489518  | 0.339923  |
| 6                                                                 | 1.362744  | 0.527981  | -0.712327 |
| 6                                                                 | 1.121601  | 1.883327  | -0.244991 |
| 6                                                                 | -2.991390 | 0.959865  | 0.460793  |
| 8                                                                 | -2.779336 | -1.434328 | -0.356851 |
| 12                                                                | 0.090663  | -2.885908 | 0.592293  |
| 6                                                                 | -0.190397 | 2.287914  | -0.094876 |
| 8                                                                 | -2.573593 | 2.243453  | 0.733565  |
| 6                                                                 | -1.349559 | -1.840577 | -0.452769 |
| 6                                                                 | -2.942718 | -0.176954 | 0.015520  |
| 6                                                                 | 2.389645  | -1.403093 | 0.345707  |
| 6                                                                 | 2.459531  | -0.049613 | 0.024337  |
| 6                                                                 | 0.449729  | -0.242664 | -1.437000 |
| 12                                                                | 3.185457  | 1.907664  | 0.163581  |
| 16                                                                |           |           |           |
| 180.549371 Kcal/mol 7.829372 eV -101.095957 H Child_6_50.log      |           |           |           |
| 12                                                                | 2.565228  | 1.228191  | -0.861897 |
| 8                                                                 | -5.486538 | -0.151683 | -0.317678 |
| 6                                                                 | 3.070497  | -0.427660 | -1.954397 |
| 6                                                                 | -4.329795 | -0.108552 | -0.117948 |
| 6                                                                 | 1.127425  | 2.560137  | -0.213236 |
| 6                                                                 | -3.005443 | -0.062196 | 0.154191  |
| 8                                                                 | 2.398447  | 0.266666  | 1.034732  |

|                                                                   |           |           |           |
|-------------------------------------------------------------------|-----------|-----------|-----------|
| 6                                                                 | -2.155552 | -1.202707 | 0.031853  |
| 6                                                                 | -0.059599 | 2.345117  | 0.129972  |
| 6                                                                 | -1.107722 | -1.874286 | 0.030437  |
| 6                                                                 | -1.305773 | 1.850498  | 0.201973  |
| 6                                                                 | 1.914473  | -0.992615 | 1.569356  |
| 6                                                                 | 2.376046  | -1.350279 | -1.436711 |
| 12                                                                | 0.944264  | -2.130765 | -0.151532 |
| 6                                                                 | -2.329159 | 1.171236  | 0.327636  |
| 6                                                                 | 2.903074  | -0.256856 | 2.347661  |
| 16                                                                |           |           |           |
| 180.718220 Kcal/mol 7.836694 eV -101.095688 H MutD_7_78.log       |           |           |           |
| 6                                                                 | 4.195074  | 0.265460  | 0.003558  |
| 6                                                                 | -0.708692 | 1.085893  | 0.784813  |
| 12                                                                | -2.785871 | 1.986773  | -1.006416 |
| 6                                                                 | -1.119607 | 2.388149  | 0.619835  |
| 12                                                                | -2.807829 | -2.074744 | -0.596778 |
| 6                                                                 | 5.324333  | 0.209752  | -0.639892 |
| 6                                                                 | -0.390474 | -0.891164 | 0.585618  |
| 6                                                                 | -1.769076 | 3.409208  | 0.236010  |
| 6                                                                 | 6.401300  | -0.132071 | -1.278657 |
| 6                                                                 | -1.541238 | -0.026729 | 0.251410  |
| 8                                                                 | -1.248424 | -3.035917 | 0.076674  |
| 6                                                                 | 0.476993  | 0.228770  | 0.912997  |
| 6                                                                 | 1.811341  | 0.312733  | 0.924078  |
| 8                                                                 | -0.117363 | -2.160194 | 0.519277  |
| 6                                                                 | 3.024079  | 0.303668  | 0.530474  |
| 6                                                                 | -2.695583 | -0.049581 | -0.518460 |
| 16                                                                |           |           |           |
| 180.856128 Kcal/mol 7.842674 eV -101.095468 H Child_14_21.log     |           |           |           |
| 8                                                                 | 5.080079  | -2.203728 | -0.012945 |
| 8                                                                 | -4.036632 | -1.166146 | -1.028580 |
| 6                                                                 | 4.077574  | -1.562855 | -0.058383 |
| 12                                                                | -3.388458 | -1.653695 | 0.790003  |
| 6                                                                 | 2.963548  | -0.905806 | -0.187711 |
| 6                                                                 | -2.237774 | -0.391188 | 1.926045  |
| 6                                                                 | 2.427008  | 0.421789  | -0.213963 |
| 6                                                                 | -3.401966 | -0.063074 | -1.202321 |
| 6                                                                 | 2.540553  | 1.657322  | 0.449103  |
| 6                                                                 | -1.923016 | 0.524176  | 1.114942  |
| 6                                                                 | 1.141352  | 0.114052  | -0.838347 |
| 6                                                                 | -2.634182 | 0.884902  | -0.948367 |
| 6                                                                 | 2.144592  | 2.832648  | 0.693464  |
| 6                                                                 | -1.692162 | 1.350291  | -0.015589 |
| 6                                                                 | 1.382851  | -1.182685 | -0.314605 |
| 12                                                                | 0.298637  | 2.060492  | -0.297788 |
| 16                                                                |           |           |           |
| 180.971892 Kcal/mol 7.847694 eV -101.095283 H Original2D_0_14.log |           |           |           |
| 6                                                                 | -2.803162 | -1.124208 | -0.000000 |
| 6                                                                 | -1.913932 | -1.971420 | -0.000000 |
| 8                                                                 | 0.000000  | -0.199943 | 0.000000  |
| 6                                                                 | -0.585471 | -2.497376 | -0.000000 |
| 12                                                                | -1.753901 | 2.072676  | -0.000000 |
| 6                                                                 | 0.451056  | -1.493477 | 0.000000  |
| 6                                                                 | 0.818025  | 0.903920  | 0.000000  |
| 6                                                                 | 1.721533  | 2.755805  | 0.000000  |

|    |           |           |           |
|----|-----------|-----------|-----------|
| 6  | 0.339172  | 2.185566  | 0.000000  |
| 6  | 2.253288  | 1.249414  | 0.000000  |
| 6  | -3.419107 | 0.089351  | -0.000000 |
| 6  | 2.300491  | 3.940489  | 0.000000  |
| 8  | 3.321213  | 0.677105  | 0.000000  |
| 12 | 1.890403  | -3.131400 | 0.000000  |
| 6  | -3.639506 | 1.326387  | -0.000000 |
| 6  | -0.223674 | -3.883217 | -0.000000 |

16

181.178553 Kcal/mol 7.856656 eV -101.094954 H MutD\_11\_76.log

|    |           |           |           |
|----|-----------|-----------|-----------|
| 6  | 6.508814  | 0.369998  | 1.480019  |
| 6  | -4.891168 | 2.253185  | -0.014428 |
| 6  | -3.753681 | 2.847541  | -0.138726 |
| 6  | 6.818341  | 0.883701  | 0.176426  |
| 8  | -2.677312 | 3.401932  | -0.237258 |
| 6  | 5.585914  | 0.060284  | 0.508686  |
| 6  | -3.069668 | -2.295093 | 0.094448  |
| 6  | 4.406068  | -0.454251 | 0.054578  |
| 6  | -5.468213 | -1.377175 | 0.379728  |
| 8  | 7.387443  | 1.466755  | -0.718289 |
| 6  | -4.278078 | -1.826211 | 0.248574  |
| 12 | -5.950468 | 0.630351  | 0.225549  |
| 6  | -0.543177 | -2.093450 | -0.376365 |
| 6  | -1.782630 | -2.161366 | -0.139775 |
| 12 | 1.389540  | -1.527081 | -0.567338 |
| 6  | 3.309161  | -0.905286 | -0.315525 |

16

181.327492 Kcal/mol 7.863114 eV -101.094717 H Original2D\_0\_11.log

|    |           |           |           |
|----|-----------|-----------|-----------|
| 6  | -1.599497 | -1.315654 | -0.000000 |
| 6  | -1.965273 | 0.013124  | -0.000000 |
| 12 | 0.191695  | -2.336670 | -0.000000 |
| 6  | -2.030859 | 2.463404  | 0.000000  |
| 6  | 3.716924  | 1.818582  | 0.000000  |
| 6  | -1.328649 | 1.300083  | 0.000000  |
| 6  | -2.735719 | 3.531680  | 0.000000  |
| 6  | -3.085657 | -1.569627 | -0.000000 |
| 6  | 3.204897  | -1.685419 | 0.000000  |
| 8  | 0.000000  | 1.251722  | 0.000000  |
| 12 | 1.658939  | 2.053433  | 0.000000  |
| 6  | 3.946135  | 0.561676  | 0.000000  |
| 6  | 4.188449  | -0.761244 | 0.000000  |
| 8  | -3.408129 | -0.175059 | -0.000000 |
| 6  | 2.221111  | -2.475367 | -0.000000 |
| 6  | -3.688959 | -2.750313 | -0.000000 |

16

181.427520 Kcal/mol 7.867452 eV -101.094557 H MutI\_17\_53.log

|    |           |           |           |
|----|-----------|-----------|-----------|
| 6  | 3.004936  | 1.538526  | 0.230651  |
| 6  | -0.449137 | -0.931058 | -0.661356 |
| 6  | -6.515344 | -0.560860 | 0.896387  |
| 6  | -5.337242 | -0.866037 | 0.460840  |
| 6  | 2.289689  | 2.571158  | 0.229411  |
| 12 | 3.269196  | -0.463672 | -0.099994 |
| 6  | 1.439341  | 3.610102  | 0.252951  |
| 8  | -0.961058 | 4.211922  | 0.040719  |
| 6  | 0.763324  | -1.595217 | -0.946754 |

|                                                                  |           |           |           |
|------------------------------------------------------------------|-----------|-----------|-----------|
| 8                                                                | -0.470327 | 0.286253  | -0.274530 |
| 12                                                               | 3.450004  | -3.431415 | 1.061594  |
| 6                                                                | 1.994685  | -1.768039 | -1.080664 |
| 6                                                                | -2.977856 | -1.469791 | -0.423144 |
| 6                                                                | -4.182621 | -1.191067 | -0.009474 |
| 6                                                                | -1.748213 | -1.449288 | -0.678154 |
| 6                                                                | 0.188550  | 3.904179  | 0.117854  |
| 16                                                               |           |           |           |
| 181.826209 Kcal/mol 7.884741 eV -101.093922 H Original3D_7_4.log |           |           |           |
| 6                                                                | 2.502646  | -1.355230 | -0.897268 |
| 6                                                                | 0.815570  | -0.255403 | 1.065788  |
| 6                                                                | -1.538521 | -0.172464 | 0.160194  |
| 12                                                               | 2.221219  | 1.637337  | 0.557696  |
| 6                                                                | -1.935331 | -1.608532 | 0.428002  |
| 6                                                                | -0.286585 | 0.476137  | 0.600958  |
| 6                                                                | 1.579354  | -1.590949 | 0.074847  |
| 8                                                                | 3.264573  | -1.176088 | -1.768357 |
| 6                                                                | 0.428499  | -2.364834 | 0.033813  |
| 6                                                                | 0.064933  | 1.838313  | 0.341929  |
| 6                                                                | 1.973283  | -0.690758 | 1.590202  |
| 6                                                                | -0.530869 | 2.861240  | -0.214826 |
| 6                                                                | -2.303558 | 0.376317  | -0.849666 |
| 8                                                                | -0.852252 | 3.931674  | -0.643000 |
| 6                                                                | -0.799017 | -2.386435 | 0.283450  |
| 12                                                               | -3.814635 | -1.038095 | -0.258837 |
| 16                                                               |           |           |           |
| 182.095058 Kcal/mol 7.896399 eV -101.093493 H Child_10_21.log    |           |           |           |
| 6                                                                | 5.857868  | -0.373240 | -0.719157 |
| 12                                                               | -4.112128 | -2.410835 | 0.254546  |
| 6                                                                | 4.955697  | 0.004591  | 0.048687  |
| 8                                                                | -2.334281 | -2.191150 | 1.314841  |
| 6                                                                | 6.796213  | -0.774998 | -1.544138 |
| 6                                                                | -3.109166 | -0.451973 | -0.065529 |
| 6                                                                | 3.934695  | 0.437306  | 0.801522  |
| 6                                                                | -2.266729 | -1.093817 | 0.767320  |
| 6                                                                | 7.734799  | -1.176620 | -2.338906 |
| 8                                                                | -6.670838 | 1.342922  | -2.008188 |
| 6                                                                | 2.947584  | 0.857920  | 1.458397  |
| 6                                                                | -1.917517 | 0.160732  | 0.329009  |
| 6                                                                | -5.573399 | 1.390060  | -2.240063 |
| 12                                                               | 1.150449  | 1.712592  | 1.590620  |
| 6                                                                | -1.033472 | 1.230109  | 0.404672  |
| 6                                                                | -0.396392 | 2.317388  | 0.332316  |
| 16                                                               |           |           |           |
| 182.163779 Kcal/mol 7.899379 eV -101.093384 H Child_2_59.log     |           |           |           |
| 6                                                                | -0.271305 | -2.577223 | 0.346790  |
| 6                                                                | 0.466361  | 2.531990  | 0.081426  |
| 12                                                               | -8.726707 | -1.009338 | -0.321276 |
| 6                                                                | 1.760249  | 2.113673  | -0.082632 |
| 8                                                                | 0.729350  | -3.372851 | 0.216661  |
| 6                                                                | -0.767813 | 2.047571  | 0.237726  |
| 6                                                                | -1.102726 | -1.671424 | 0.434795  |
| 6                                                                | 2.765205  | 1.416712  | -0.203966 |
| 6                                                                | -1.459994 | -0.369692 | 0.423218  |
| 6                                                                | -0.645416 | 3.513510  | 0.041579  |

|                                                                  |           |           |           |
|------------------------------------------------------------------|-----------|-----------|-----------|
| 12                                                               | 2.418143  | -2.648914 | -0.259283 |
| 6                                                                | -1.441318 | 0.864323  | 0.376916  |
| 6                                                                | -1.184863 | 4.705598  | -0.096983 |
| 6                                                                | 3.480160  | -0.966327 | -0.634376 |
| 6                                                                | 3.609735  | 0.321714  | -0.325676 |
| 8                                                                | 4.827291  | -0.087588 | 0.205065  |
| 16                                                               |           |           |           |
| 182.430257 Kcal/mol 7.910935 eV -101.092959 H Original3D_4_3.log |           |           |           |
| 8                                                                | -1.353746 | -1.028719 | 0.007453  |
| 12                                                               | -0.437967 | -2.372799 | 0.840365  |
| 8                                                                | -1.741877 | 1.104867  | -0.687077 |
| 6                                                                | 1.313928  | 2.499722  | 0.866913  |
| 6                                                                | -4.799591 | -0.688928 | -0.370050 |
| 6                                                                | -3.569563 | -0.352631 | -0.379489 |
| 6                                                                | 2.092797  | 0.798311  | -1.103554 |
| 6                                                                | 1.437676  | -3.071407 | 1.042966  |
| 12                                                               | 2.997708  | -1.044154 | -0.889196 |
| 6                                                                | 2.258349  | -2.484956 | 0.286636  |
| 6                                                                | -0.453782 | 1.482727  | -0.311274 |
| 6                                                                | -2.235417 | -0.137214 | -0.336201 |
| 6                                                                | 0.465644  | 3.294653  | 1.735236  |
| 6                                                                | 1.851696  | 1.890070  | -0.266896 |
| 6                                                                | 0.744518  | 1.274675  | -1.002012 |
| 6                                                                | -0.098242 | 2.227354  | 0.841554  |
| 16                                                               |           |           |           |
| 182.489422 Kcal/mol 7.913500 eV -101.092865 H MutI_14_51.log     |           |           |           |
| 6                                                                | 2.880934  | -0.871332 | -0.105674 |
| 6                                                                | -2.565588 | 3.771588  | -0.077249 |
| 6                                                                | -1.155472 | 3.302524  | 0.024084  |
| 6                                                                | 0.138764  | 3.257118  | 0.039992  |
| 12                                                               | -3.161409 | -2.793375 | -0.897083 |
| 8                                                                | 5.220586  | -1.560225 | -0.463338 |
| 6                                                                | 1.408038  | 2.998265  | 0.073795  |
| 12                                                               | -1.939429 | 0.287337  | -0.173290 |
| 6                                                                | 0.394430  | -0.311787 | 0.245055  |
| 8                                                                | -1.740791 | -3.396948 | 0.822149  |
| 6                                                                | 2.574753  | 2.449884  | 0.252459  |
| 6                                                                | 1.675989  | -0.525797 | 0.098222  |
| 6                                                                | 4.101492  | -1.223286 | -0.280253 |
| 6                                                                | -0.982539 | -2.428717 | 0.882960  |
| 6                                                                | -2.324545 | 2.420515  | -0.124630 |
| 6                                                                | -0.584307 | -1.217334 | 0.633572  |
| 16                                                               |           |           |           |
| 182.521547 Kcal/mol 7.914893 eV -101.092814 H Child_16_26.log    |           |           |           |
| 12                                                               | 3.167589  | 2.059037  | -0.578633 |
| 6                                                                | -8.491394 | 1.159710  | -0.514683 |
| 6                                                                | 3.801640  | 0.063536  | -0.543640 |
| 6                                                                | -7.315161 | 0.589050  | -0.525659 |
| 6                                                                | 4.759088  | -0.556866 | -1.188993 |
| 6                                                                | -6.115349 | 0.106518  | -0.480032 |
| 8                                                                | 5.640584  | -1.036910 | -1.832934 |
| 6                                                                | -4.898154 | -0.321242 | -0.351404 |
| 8                                                                | 3.141811  | -0.723418 | 0.496341  |
| 6                                                                | -3.704105 | -0.753328 | -0.178344 |
| 6                                                                | 2.169271  | 2.485364  | 1.219319  |



|                                                                   |           |           |           |
|-------------------------------------------------------------------|-----------|-----------|-----------|
| 6                                                                 | -2.443748 | -1.114768 | 0.058036  |
| 6                                                                 | 2.138053  | 1.207937  | 1.373825  |
| 6                                                                 | -1.272927 | -1.513420 | 0.239447  |
| 6                                                                 | 2.241683  | -0.171587 | 1.381954  |
| 12                                                                | 0.543033  | -1.475938 | 1.224782  |
| 16                                                                |           |           |           |
| 182.755975 Kcal/mol 7.925059 eV -101.092440 H Child_1_45.log      |           |           |           |
| 12                                                                | 3.380508  | -1.711286 | 0.000000  |
| 6                                                                 | -4.467885 | 2.424079  | -0.000000 |
| 6                                                                 | 2.397729  | 0.203188  | 0.000000  |
| 6                                                                 | -3.473165 | 1.579725  | -0.000000 |
| 6                                                                 | 2.952415  | 1.500235  | 0.000000  |
| 8                                                                 | -3.544211 | -1.311708 | -0.000000 |
| 6                                                                 | 0.916190  | -3.949082 | 0.000000  |
| 6                                                                 | -2.368948 | 0.829920  | -0.000000 |
| 8                                                                 | 1.696197  | -3.077995 | 0.000000  |
| 6                                                                 | -2.475514 | -0.693505 | -0.000000 |
| 6                                                                 | 2.085440  | 2.534200  | 0.000000  |
| 6                                                                 | -1.158099 | -1.359304 | -0.000000 |
| 6                                                                 | 1.081238  | -0.074877 | 0.000000  |
| 12                                                                | -0.454972 | 1.868280  | -0.000000 |
| 6                                                                 | 0.000000  | -0.841087 | 0.000000  |
| 6                                                                 | 1.123545  | 3.385458  | 0.000000  |
| 16                                                                |           |           |           |
| 182.966926 Kcal/mol 7.934207 eV -101.092104 H Original3D_0_72.log |           |           |           |
| 6                                                                 | 1.083965  | -1.767161 | -0.782413 |
| 6                                                                 | -0.154724 | 1.668013  | 0.328684  |
| 6                                                                 | 2.801398  | -0.068929 | 0.493223  |
| 6                                                                 | -0.742121 | 0.683862  | 0.980626  |
| 12                                                                | -0.947663 | -1.891149 | -0.160104 |
| 6                                                                 | 2.317499  | 1.231132  | 0.038120  |
| 6                                                                 | 2.294307  | 2.292306  | -0.868824 |
| 12                                                                | -3.436599 | -0.166287 | 1.144091  |
| 6                                                                 | -1.395800 | -0.387989 | 1.359454  |
| 8                                                                 | -1.987034 | 1.674601  | -1.310176 |
| 6                                                                 | 2.225999  | -1.125116 | -0.335400 |
| 6                                                                 | 2.372216  | -2.190285 | -1.308906 |
| 6                                                                 | 1.107111  | 1.899905  | -0.082084 |
| 6                                                                 | -2.452663 | 0.560692  | -1.137850 |
| 6                                                                 | -2.859573 | -0.649810 | -0.823514 |
| 8                                                                 | 3.615216  | -0.198413 | 1.438360  |
| 16                                                                |           |           |           |
| 182.986617 Kcal/mol 7.935061 eV -101.092073 H Child_2_49.log      |           |           |           |
| 6                                                                 | 0.289516  | 1.184146  | -1.265903 |
| 6                                                                 | -1.256096 | -1.540119 | -0.459435 |
| 6                                                                 | 1.023569  | 1.135360  | -0.085805 |
| 8                                                                 | -4.284605 | -0.925037 | 1.561083  |
| 6                                                                 | -0.802917 | 1.081061  | -1.916466 |
| 6                                                                 | -0.145784 | -2.023888 | -0.229673 |
| 12                                                                | -0.992298 | 1.597054  | 0.761892  |
| 12                                                                | -2.552550 | 0.069878  | -1.293331 |
| 6                                                                 | 5.985939  | 0.147205  | 0.621567  |
| 6                                                                 | 1.207277  | -2.277596 | -0.276747 |
| 6                                                                 | 4.686575  | 0.349345  | 0.563618  |
| 6                                                                 | -3.646637 | -0.015495 | 1.090705  |

|                                                                   |           |           |           |
|-------------------------------------------------------------------|-----------|-----------|-----------|
| 6                                                                 | 3.375451  | 0.436273  | 0.557679  |
| 6                                                                 | -2.939279 | 0.922456  | 0.515830  |
| 6                                                                 | 2.163028  | 0.398114  | 0.195976  |
| 8                                                                 | 2.146395  | -1.423007 | -0.247433 |
| 16                                                                |           |           |           |
| 183.735199 Kcal/mol 7.967522 eV -101.090880 H MutI_9_69.log       |           |           |           |
| 6                                                                 | 0.349634  | 2.572979  | 0.039636  |
| 8                                                                 | -4.065600 | -1.293561 | -0.112967 |
| 6                                                                 | 2.448931  | -2.298813 | 0.199852  |
| 6                                                                 | -3.849934 | 0.022695  | -0.005043 |
| 6                                                                 | -2.861817 | -1.957366 | -0.055993 |
| 6                                                                 | -1.687315 | -2.333388 | -0.001893 |
| 8                                                                 | 2.426353  | 1.207731  | -0.350612 |
| 6                                                                 | 0.858382  | 3.806478  | 0.193206  |
| 6                                                                 | 0.535096  | 0.105282  | -0.273890 |
| 6                                                                 | -3.248778 | 1.071387  | 0.129503  |
| 6                                                                 | -2.188313 | 1.918270  | 0.162703  |
| 6                                                                 | 1.087172  | 1.330085  | -0.198424 |
| 12                                                                | 3.688200  | -0.119333 | -0.015779 |
| 12                                                                | 0.365292  | -2.090299 | 0.007996  |
| 6                                                                 | -1.062044 | 2.399193  | 0.151750  |
| 6                                                                 | 3.697665  | -2.103100 | 0.292264  |
| 16                                                                |           |           |           |
| 183.831316 Kcal/mol 7.971690 eV -101.090727 H Child_1_27.log      |           |           |           |
| 6                                                                 | 3.091829  | -0.668549 | 2.863149  |
| 6                                                                 | -5.070321 | 1.723433  | 0.905448  |
| 6                                                                 | 1.973340  | -0.619690 | 2.172237  |
| 6                                                                 | -3.945041 | 1.248558  | 0.463035  |
| 6                                                                 | 0.970473  | -0.605188 | 1.318250  |
| 6                                                                 | -2.816020 | 0.812892  | 0.010363  |
| 12                                                                | -0.928441 | -1.544270 | 1.294321  |
| 6                                                                 | -1.695696 | 0.333707  | -0.581823 |
| 6                                                                 | 2.896021  | 1.863231  | -0.586287 |
| 6                                                                 | 0.518757  | -2.016901 | -1.903056 |
| 8                                                                 | 3.763547  | 2.582838  | -0.428880 |
| 6                                                                 | 1.721291  | -1.561119 | -1.914507 |
| 6                                                                 | -1.603169 | -1.114821 | -0.838179 |
| 8                                                                 | -0.610408 | 1.060297  | -0.881609 |
| 6                                                                 | -0.721802 | -1.768455 | -1.442888 |
| 12                                                                | 1.166518  | 0.301965  | -0.653533 |
| 16                                                                |           |           |           |
| 183.835526 Kcal/mol 7.971873 eV -101.090720 H Original3D_0_55.log |           |           |           |
| 6                                                                 | -0.258366 | 1.197463  | 0.597463  |
| 6                                                                 | -0.645181 | 2.408398  | 0.193599  |
| 6                                                                 | 0.973386  | 0.576287  | 1.013903  |
| 6                                                                 | -1.397504 | 0.445826  | -0.035905 |
| 6                                                                 | 1.192205  | -2.023154 | 1.352433  |
| 6                                                                 | -1.204933 | -0.278689 | -1.230981 |
| 6                                                                 | 1.264667  | -3.296130 | 1.636889  |
| 6                                                                 | 2.181663  | 1.343536  | 1.130073  |
| 6                                                                 | 3.076767  | 1.023803  | 0.171028  |
| 6                                                                 | 1.099504  | -0.801439 | 0.932344  |
| 6                                                                 | -2.734750 | 0.356490  | 0.584423  |
| 8                                                                 | -0.056495 | -0.282918 | -1.866971 |
| 8                                                                 | -3.156785 | 0.935452  | 1.577649  |

|                                                                  |           |           |           |
|------------------------------------------------------------------|-----------|-----------|-----------|
| 6                                                                | 3.651695  | 0.678810  | -0.926999 |
| 12                                                               | -3.215709 | -0.983130 | -1.044581 |
| 12                                                               | 1.758320  | -0.267492 | -1.471673 |
| 16                                                               |           |           |           |
| 183.967525 Kcal/mol 7.977597 eV -101.090509 H Child_8_34.log     |           |           |           |
| 6                                                                | 0.210302  | 2.489405  | 0.795629  |
| 12                                                               | 3.077763  | -2.831468 | -0.519629 |
| 12                                                               | 2.131921  | 2.116522  | 0.510619  |
| 6                                                                | 1.268371  | -1.545701 | -0.555508 |
| 6                                                                | -1.011156 | 2.408053  | 0.468405  |
| 6                                                                | -2.310458 | 2.275329  | 0.123317  |
| 8                                                                | 4.654047  | -1.574443 | -0.031248 |
| 6                                                                | 3.056725  | 0.260303  | -0.113811 |
| 6                                                                | 4.238130  | 1.101389  | 0.329115  |
| 6                                                                | -3.469893 | 2.061612  | -0.322537 |
| 6                                                                | -6.400831 | -2.968404 | 0.630349  |
| 6                                                                | 4.302131  | -0.335604 | 0.083487  |
| 6                                                                | -4.689622 | 1.845605  | -0.796980 |
| 6                                                                | 1.958970  | -0.479470 | -0.406163 |
| 6                                                                | -5.926724 | 1.737361  | -1.154162 |
| 8                                                                | -5.888030 | -3.990547 | 0.733907  |
| 16                                                               |           |           |           |
| 184.021994 Kcal/mol 7.979959 eV -101.090423 H MutI_15_75.log     |           |           |           |
| 6                                                                | 0.184644  | -1.974505 | -1.688886 |
| 12                                                               | -1.671922 | -1.151245 | -0.861696 |
| 6                                                                | -2.511599 | 0.609449  | 1.031237  |
| 6                                                                | -3.404229 | 0.063747  | 0.079091  |
| 8                                                                | 2.773006  | 1.068494  | -0.424344 |
| 12                                                               | 1.336698  | -1.846018 | 1.098476  |
| 6                                                                | 0.404588  | 3.772410  | -0.268666 |
| 6                                                                | 0.951685  | 2.609681  | -0.281876 |
| 6                                                                | 1.382109  | 1.345412  | -0.306085 |
| 6                                                                | -0.225972 | -0.195614 | 0.983840  |
| 6                                                                | 0.646531  | -1.005069 | -1.012507 |
| 6                                                                | -1.306598 | 0.498814  | 1.438982  |
| 8                                                                | -4.596271 | 0.124333  | -0.170665 |
| 6                                                                | 3.231606  | -1.292251 | 0.490414  |
| 6                                                                | 0.607247  | 0.133714  | -0.120879 |
| 6                                                                | 3.141454  | -0.161698 | -0.024880 |
| 16                                                               |           |           |           |
| 184.087701 Kcal/mol 7.982808 eV -101.090318 H Original3D_9_4.log |           |           |           |
| 6                                                                | -1.807989 | 0.031024  | -0.480968 |
| 6                                                                | -0.465574 | -0.078336 | -0.763974 |
| 6                                                                | 2.149294  | -3.663601 | 0.386184  |
| 8                                                                | 1.416063  | -2.926033 | 0.875568  |
| 6                                                                | 0.752032  | -0.036915 | -1.001347 |
| 12                                                               | 1.170346  | 2.238047  | 0.106669  |
| 6                                                                | -2.758031 | 0.958858  | -0.036415 |
| 6                                                                | 3.181970  | 0.134730  | -1.546552 |
| 8                                                                | 1.527722  | -0.115369 | 2.736447  |
| 6                                                                | -4.011314 | -1.419101 | -0.389286 |
| 6                                                                | 1.427457  | 0.694986  | 1.938465  |
| 6                                                                | 4.366423  | -0.207383 | -1.932504 |
| 12                                                               | -1.664070 | 2.776212  | 0.328051  |
| 6                                                                | -3.144083 | -0.407719 | -0.334093 |

|                                                              |           |           |           |
|--------------------------------------------------------------|-----------|-----------|-----------|
| 6                                                            | -4.651545 | -2.523313 | -0.491154 |
| 6                                                            | 2.023765  | 0.543455  | -1.033816 |
| 16                                                           |           |           |           |
| 184.157555 Kcal/mol 7.985837 eV -101.090207 H Child_3_49.log |           |           |           |
| 8                                                            | 2.388261  | -3.849530 | 0.271049  |
| 6                                                            | -6.092194 | -0.501966 | -0.136719 |
| 6                                                            | 2.303204  | -2.476855 | 0.059767  |
| 6                                                            | -4.822593 | -0.366773 | -0.249202 |
| 6                                                            | 3.126275  | -1.356359 | 0.115481  |
| 6                                                            | -3.520424 | -0.385405 | -0.147988 |
| 6                                                            | 1.023331  | -2.703436 | -0.197005 |
| 6                                                            | 0.740045  | 3.247930  | 0.013008  |
| 6                                                            | 3.362211  | -0.157510 | 0.036372  |
| 6                                                            | -2.234013 | -0.441513 | -0.008191 |
| 6                                                            | 3.208409  | 1.182023  | -0.099960 |
| 6                                                            | -0.414231 | 3.059496  | 0.427143  |
| 12                                                           | -0.876072 | -1.971841 | -0.163541 |
| 8                                                            | 2.031038  | 3.411378  | -0.381433 |
| 6                                                            | 2.752294  | 2.292338  | -0.317355 |
| 12                                                           | -1.786285 | 1.567958  | 0.489455  |
| 16                                                           |           |           |           |
| 184.251401 Kcal/mol 7.989907 eV -101.090057 H MutD_16_40.log |           |           |           |
| 6                                                            | -2.665707 | -1.844091 | -0.005582 |
| 8                                                            | -3.895956 | -1.337807 | 0.060959  |
| 6                                                            | -1.035284 | 2.278794  | 0.001165  |
| 6                                                            | -0.203781 | -2.602083 | 0.005694  |
| 12                                                           | 2.971729  | -2.302561 | 0.032566  |
| 6                                                            | -4.893772 | 1.138208  | -0.060649 |
| 6                                                            | 1.510096  | 2.556896  | 0.044134  |
| 6                                                            | 4.719066  | -1.007431 | -0.147654 |
| 6                                                            | 1.017346  | -2.814694 | 0.020301  |
| 6                                                            | -2.196335 | 1.873432  | -0.039987 |
| 6                                                            | -3.390801 | 1.209084  | -0.046048 |
| 12                                                           | 3.973170  | 1.009680  | -0.003579 |
| 6                                                            | -4.028384 | 0.026766  | -0.008982 |
| 8                                                            | 2.785477  | 2.451126  | 0.041086  |
| 6                                                            | 0.282392  | 2.550790  | 0.047266  |
| 6                                                            | -1.523992 | -2.264336 | -0.003693 |
| 16                                                           |           |           |           |
| 184.823051 Kcal/mol 8.014696 eV -101.089146 H Child_6_15.log |           |           |           |
| 12                                                           | 0.388299  | 2.706351  | -0.079426 |
| 6                                                            | -5.927632 | -0.197384 | 0.519033  |
| 6                                                            | 2.163574  | 1.573043  | 0.200802  |
| 6                                                            | -4.684659 | -0.217535 | 0.228581  |
| 12                                                           | 3.859884  | 0.414072  | 0.133918  |
| 6                                                            | -3.366223 | -0.259730 | -0.107427 |
| 6                                                            | 1.366543  | 0.470704  | 0.097648  |
| 6                                                            | -2.443028 | -1.377030 | -0.250807 |
| 6                                                            | -1.191790 | 1.183810  | -0.156757 |
| 6                                                            | -1.257805 | -1.757207 | -0.284843 |
| 8                                                            | 2.323238  | -1.951971 | 0.318831  |
| 8                                                            | 3.698686  | -1.469558 | -0.154111 |
| 6                                                            | -0.119463 | 0.335790  | -0.005307 |
| 6                                                            | -2.431341 | 0.738255  | -0.368362 |
| 6                                                            | 1.378182  | -1.056692 | -0.027537 |

|                                                                  |           |           |            |
|------------------------------------------------------------------|-----------|-----------|------------|
| 6                                                                | -0.011956 | -1.114833 | -0.173638  |
| 16                                                               |           |           |            |
| 185.015320 Kcal/mol 8.023034 eV -101.088840 H Child_7_54.log     |           |           |            |
| 8                                                                | 4.680389  | 6.282793  | -0.158497  |
| 6                                                                | -2.112756 | 0.549498  | 1.958757   |
| 6                                                                | 5.136843  | 5.268462  | 0.131344   |
| 6                                                                | -2.950845 | 1.114101  | 2.775918   |
| 6                                                                | -3.310027 | 0.394796  | -1.582103  |
| 8                                                                | 2.789301  | -3.233398 | 2.101559   |
| 6                                                                | -2.073347 | 0.282772  | -1.719607  |
| 6                                                                | 2.440046  | -2.520737 | 1.222961   |
| 6                                                                | -4.574857 | 0.402887  | -1.131087  |
| 6                                                                | 2.054527  | -1.813153 | 0.201879   |
| 6                                                                | -0.819167 | -0.062068 | -1.588653  |
| 6                                                                | 1.195850  | -1.101861 | -0.431926  |
| 6                                                                | -5.812223 | 0.163807  | -0.875854  |
| 6                                                                | 0.268158  | -0.476903 | -1.092496  |
| 12                                                               | 4.242089  | -3.576696 | -1.218264  |
| 12                                                               | -3.942984 | 0.442966  | 0.988323   |
| 16                                                               |           |           |            |
| 185.269717 Kcal/mol 8.034065 eV -101.088434 H MutD_17_54.log     |           |           |            |
| 8                                                                | -1.328028 | -0.094837 | -1.275903  |
| 6                                                                | -2.692745 | 1.042184  | 0.132098   |
| 6                                                                | -3.714911 | 0.526769  | 0.634952   |
| 6                                                                | 2.099823  | 1.371976  | 0.338598   |
| 6                                                                | 1.897789  | 2.343512  | 1.150283   |
| 6                                                                | -0.142301 | -0.370378 | -1.813068  |
| 12                                                               | 2.482732  | -0.444273 | -0.952222  |
| 6                                                                | 1.410945  | 3.367575  | 1.813942   |
| 6                                                                | 1.784789  | -2.020853 | 1.018660   |
| 6                                                                | 2.944275  | -1.669004 | 0.668975   |
| 6                                                                | -0.800241 | -2.239890 | 1.126877   |
| 12                                                               | -2.517038 | -1.294920 | 0.624648   |
| 6                                                                | -1.502727 | 1.225722  | -0.611454  |
| 6                                                                | 0.976570  | -0.497451 | -2.355847  |
| 6                                                                | 0.443502  | -2.245427 | 1.168105   |
| 8                                                                | -0.649087 | 2.077575  | -0.686825  |
| 16                                                               |           |           |            |
| 185.413448 Kcal/mol 8.040298 eV -101.088205 H Original1D_0_4.log |           |           |            |
| 12                                                               | 0.000000  | 0.000000  | 6.660115   |
| 12                                                               | 0.000000  | 0.000000  | 3.855425   |
| 6                                                                | 0.000000  | 0.000000  | 8.678098   |
| 8                                                                | 0.000000  | 0.000000  | 9.976276   |
| 6                                                                | 0.000000  | 0.000000  | 1.804546   |
| 6                                                                | 0.000000  | 0.000000  | 11.219461  |
| 6                                                                | 0.000000  | 0.000000  | 0.556084   |
| 6                                                                | 0.000000  | 0.000000  | -0.780509  |
| 6                                                                | 0.000000  | 0.000000  | -2.026061  |
| 6                                                                | 0.000000  | 0.000000  | -3.342936  |
| 6                                                                | 0.000000  | 0.000000  | -4.599068  |
| 6                                                                | 0.000000  | 0.000000  | -5.903415  |
| 6                                                                | 0.000000  | 0.000000  | -7.169281  |
| 6                                                                | 0.000000  | 0.000000  | -8.461866  |
| 6                                                                | 0.000000  | 0.000000  | -9.733425  |
| 8                                                                | 0.000000  | 0.000000  | -10.930808 |

16  
185.419856 Kcal/mol 8.040576 eV -101.088195 H MutI\_12\_77.log  
12 4.807782 0.276735 -0.028836  
6 -0.997157 0.993969 0.113071  
6 1.410236 1.840841 0.011977  
6 0.151366 1.452687 0.024461  
8 -1.906837 -1.354130 0.283900  
6 -7.427621 0.120529 -0.411933  
8 3.886333 1.942089 0.033433  
6 3.057304 -1.849134 -0.226629  
6 -2.132944 0.318818 0.206496  
12 -4.274142 0.564226 -0.012642  
6 1.744659 -1.991378 -0.052432  
6 2.651812 2.005222 0.006756  
6 -0.802123 -1.962392 0.295365  
6 0.502248 -1.862504 0.139310  
6 4.329119 -1.702403 -0.346107  
6 -6.193504 0.169878 -0.100494  
16  
185.509610 Kcal/mol 8.044468 eV -101.088052 H Child\_12\_22.log  
8 8.112900 -1.809812 0.110245  
6 -6.261794 -2.196064 -0.027444  
6 6.968818 -1.738777 0.135015  
6 -5.111815 -1.602739 -0.076156  
12 2.495013 -0.171693 -0.161729  
6 -3.986820 -0.906354 0.015293  
6 0.700981 3.287250 -0.017048  
8 -2.716678 -1.765378 -0.014101  
6 2.877716 1.852316 -0.192775  
6 -1.655527 -0.961282 0.047188  
6 1.793492 2.526485 -0.076728  
12 -2.786844 0.950243 0.136423  
6 -0.359923 -1.433850 -0.003185  
6 -0.608456 3.045042 0.054221  
6 0.888890 -1.471898 -0.067046  
6 -1.856864 2.809692 0.131084  
16  
185.590275 Kcal/mol 8.047966 eV -101.087923 H Child\_1\_22.log  
6 3.668207 -1.615193 1.217693  
6 0.266125 1.970444 -1.542006  
6 2.866721 -0.798701 0.509100  
8 -1.780549 1.586530 3.047259  
8 3.094898 0.443152 0.012117  
6 1.605111 -1.471899 0.336417  
6 -1.694390 1.587897 1.905756  
6 0.642094 -2.563683 0.502149  
12 -2.331833 1.454982 -0.561252  
12 2.186912 1.687553 -0.929866  
6 -3.651662 -2.690788 -0.512993  
6 0.341165 -1.350931 -0.192071  
6 -2.780154 -1.738364 -0.544798  
6 -2.007014 -0.671799 -0.767685  
6 -0.603237 -0.463740 -0.798799  
6 -0.115591 0.815445 -1.209695  
16

185.784108 Kcal/mol 8.056372 eV -101.087615 H Original2D\_0\_30.log

|    |           |           |           |
|----|-----------|-----------|-----------|
| 6  | 3.158421  | 0.231099  | 0.000000  |
| 6  | 0.000000  | -0.881037 | 0.000000  |
| 6  | 2.668329  | -0.920431 | 0.000000  |
| 6  | 0.702988  | -2.154716 | 0.000000  |
| 12 | 1.301260  | 1.157509  | -0.000000 |
| 8  | -1.299788 | -0.856827 | -0.000000 |
| 6  | -0.936660 | -4.147529 | 0.000000  |
| 12 | -2.717932 | 0.347225  | -0.000000 |
| 6  | -1.979162 | -4.928987 | 0.000000  |
| 8  | 2.115087  | -2.143427 | 0.000000  |
| 6  | -0.014367 | 2.897450  | -0.000000 |
| 6  | -1.393776 | 2.696283  | -0.000000 |
| 6  | 0.012035  | -3.283036 | 0.000000  |
| 6  | 0.673922  | 4.049666  | -0.000000 |
| 6  | 1.457523  | 5.085097  | -0.000000 |
| 6  | -2.602976 | 2.347011  | -0.000000 |

16

186.291910 Kcal/mol 8.078392 eV -101.086805 H MutI\_13\_47.log

|    |           |           |           |
|----|-----------|-----------|-----------|
| 6  | 2.909587  | 1.551213  | 0.000000  |
| 6  | 2.506520  | 4.167454  | -0.000000 |
| 6  | 0.492428  | 0.682632  | -0.000000 |
| 6  | 1.976020  | 0.618702  | 0.000000  |
| 6  | -0.359105 | 1.789705  | -0.000000 |
| 12 | 0.488130  | 3.688369  | -0.000000 |
| 6  | -0.000000 | -0.765386 | 0.000000  |
| 6  | -2.586064 | -3.799116 | 0.000000  |
| 6  | -2.885499 | -2.523711 | -0.000000 |
| 12 | -1.895278 | 0.438142  | -0.000000 |
| 6  | 2.697071  | 2.896381  | -0.000000 |
| 6  | 0.066339  | -2.304298 | 0.000000  |
| 8  | 2.350101  | -0.877257 | 0.000000  |
| 6  | -3.062889 | -1.281353 | -0.000000 |
| 6  | 1.199208  | -1.505533 | 0.000000  |
| 8  | -2.454590 | -4.957526 | 0.000000  |

16

186.978764 Kcal/mol 8.108177 eV -101.085711 H MutI\_13\_67.log

|    |           |           |           |
|----|-----------|-----------|-----------|
| 6  | -1.395288 | 1.411170  | -0.027303 |
| 6  | -2.401175 | -1.679675 | -0.316554 |
| 6  | 2.978016  | 1.246699  | 0.472378  |
| 8  | 4.152101  | 0.583628  | 0.752529  |
| 6  | 4.163157  | -1.861055 | -0.188332 |
| 12 | 2.087649  | -1.705277 | -0.433573 |
| 6  | -3.788055 | -2.140687 | -0.105969 |
| 6  | -0.982374 | 2.648746  | -0.326611 |
| 6  | -1.385578 | -0.980592 | -0.403124 |
| 6  | 0.795120  | 0.126028  | -0.336812 |
| 6  | 4.102213  | -0.708097 | 0.308270  |
| 8  | -4.369904 | -1.075466 | 0.478457  |
| 6  | -0.668745 | 3.836813  | -0.752637 |
| 6  | 1.852522  | 0.911641  | 0.005477  |
| 6  | -0.579844 | 0.198144  | -0.306932 |
| 12 | -3.287431 | 0.528601  | 0.601989  |

16

187.408362 Kcal/mol 8.126806 eV -101.085026 H Child\_9\_53.log

|                                                               |           |           |           |
|---------------------------------------------------------------|-----------|-----------|-----------|
| 6                                                             | 2.871826  | -1.062405 | 0.613520  |
| 8                                                             | -4.677496 | 0.510927  | 0.583792  |
| 12                                                            | 2.799531  | 0.727156  | -0.370991 |
| 6                                                             | -3.544131 | 0.815968  | 0.491075  |
| 6                                                             | 2.002916  | -1.927252 | 0.834120  |
| 6                                                             | -2.226317 | 0.868686  | 0.428976  |
| 6                                                             | 1.093421  | 0.762862  | -1.678165 |
| 6                                                             | 2.507145  | 2.898998  | 0.819114  |
| 8                                                             | 1.032853  | -2.877110 | 0.975331  |
| 6                                                             | 1.312313  | 2.469162  | 0.578138  |
| 6                                                             | -0.139311 | 0.545412  | -1.995959 |
| 6                                                             | -1.151097 | 1.622914  | 0.362411  |
| 6                                                             | -0.042526 | -2.716569 | 0.186668  |
| 6                                                             | 0.090795  | 2.006689  | 0.357541  |
| 6                                                             | -1.045832 | -2.864957 | -0.564106 |
| 12                                                            | -1.234370 | -0.859455 | -0.885091 |
| 16                                                            |           |           |           |
| 188.292852 Kcal/mol 8.165161 eV -101.083617 H Child_8_50.log  |           |           |           |
| 6                                                             | -2.991253 | -0.790958 | -0.110869 |
| 6                                                             | 9.103234  | -1.118227 | 1.136038  |
| 6                                                             | -1.713397 | -0.476552 | -0.173724 |
| 6                                                             | 5.552326  | 0.069903  | 0.557798  |
| 6                                                             | -4.232478 | -1.086963 | -0.037060 |
| 8                                                             | -3.631088 | 3.501728  | 0.687448  |
| 6                                                             | -0.496499 | -0.177780 | -0.248842 |
| 8                                                             | 9.072759  | -1.574609 | 0.083345  |
| 6                                                             | -3.940835 | 3.511845  | -0.407943 |
| 6                                                             | 0.770879  | 0.152061  | -0.325393 |
| 6                                                             | 4.619931  | 0.672145  | -0.137810 |
| 6                                                             | 1.973365  | 0.486472  | -0.423244 |
| 6                                                             | 4.183087  | 1.740893  | -1.142919 |
| 12                                                            | -5.761976 | -2.390995 | -0.943103 |
| 12                                                            | -5.896215 | -0.834338 | 1.370570  |
| 6                                                             | 3.232460  | 0.898333  | -0.568690 |
| 16                                                            |           |           |           |
| 188.417753 Kcal/mol 8.170577 eV -101.083418 H Child_15_15.log |           |           |           |
| 8                                                             | -7.426446 | -0.416056 | -0.007230 |
| 6                                                             | 3.271010  | -2.821678 | -0.567573 |
| 6                                                             | -6.228132 | -0.369725 | 0.000792  |
| 6                                                             | 4.091172  | -2.342032 | 0.562790  |
| 6                                                             | -4.957125 | -0.327405 | 0.007694  |
| 6                                                             | 2.434950  | -1.648314 | -0.140076 |
| 6                                                             | -3.666611 | -0.237841 | 0.012497  |
| 6                                                             | 3.653368  | -1.003682 | 0.183176  |
| 6                                                             | -2.400439 | -0.151518 | 0.013242  |
| 12                                                            | 3.321526  | 1.867511  | -0.138016 |
| 6                                                             | -1.096354 | 0.122322  | 0.052476  |
| 6                                                             | 1.116673  | -1.267204 | -0.010188 |
| 12                                                            | -0.086940 | 2.020539  | 0.032356  |
| 6                                                             | 1.708119  | 3.307791  | 0.015587  |
| 6                                                             | -0.002120 | -0.737063 | 0.032485  |
| 8                                                             | 4.131184  | 0.191243  | 0.043545  |
| 16                                                            |           |           |           |
| 188.444081 Kcal/mol 8.171719 eV -101.083376 H Child_9_23.log  |           |           |           |
| 8                                                             | -4.958829 | -0.025506 | -0.484996 |



|    |                                                               |           |           |
|----|---------------------------------------------------------------|-----------|-----------|
| 6  | 2.882085                                                      | -1.575042 | 0.593744  |
| 12 | -0.670133                                                     | 2.089272  | 0.212414  |
| 6  | 4.031355                                                      | -1.107027 | 0.877436  |
| 6  | 1.255944                                                      | 2.595831  | -0.095359 |
| 6  | 2.548174                                                      | -1.077828 | -1.160398 |
| 6  | -2.718497                                                     | 1.177995  | -0.108252 |
| 6  | 1.749774                                                      | -1.727440 | -0.299691 |
| 6  | -3.807429                                                     | 0.132797  | -0.166796 |
| 6  | 0.382048                                                      | -1.958967 | -0.141716 |
| 6  | 2.468590                                                      | 2.320018  | -0.231519 |
| 12 | 3.726886                                                      | 0.745059  | -0.231489 |
| 6  | -1.943332                                                     | 0.537269  | 0.939510  |
| 6  | -0.824281                                                     | -1.950281 | -0.031083 |
| 6  | -2.666100                                                     | -0.605550 | 0.490890  |
| 8  | -2.145050                                                     | -1.797322 | 0.013534  |
| 16 | 189.366761 Kcal/mol 8.211730 eV -101.081905 H MutI_4_75.log   |           |           |
| 8  | -0.301698                                                     | 1.846514  | -0.340720 |
| 6  | -4.973293                                                     | 0.085874  | -0.214848 |
| 6  | 1.652311                                                      | -1.471375 | -0.510959 |
| 6  | -3.977707                                                     | 0.857557  | -0.413899 |
| 12 | 1.418494                                                      | 1.801008  | 0.194799  |
| 6  | 3.792097                                                      | 0.795980  | 0.544177  |
| 6  | -1.573564                                                     | 1.732036  | -0.429787 |
| 8  | -0.849066                                                     | -1.617248 | -0.140576 |
| 6  | 4.432049                                                      | -1.709162 | -0.590539 |
| 6  | 3.368261                                                      | 1.924118  | 0.911620  |
| 6  | -1.462843                                                     | -1.725072 | 1.159897  |
| 12 | -3.598167                                                     | -1.270446 | 0.553645  |
| 6  | -2.776720                                                     | 1.507581  | -0.498339 |
| 6  | 0.448264                                                      | -1.550616 | -0.326113 |
| 6  | 3.023642                                                      | -1.347550 | -0.487912 |
| 6  | 3.941201                                                      | -0.466182 | 0.001540  |
| 16 | 189.835463 Kcal/mol 8.232055 eV -101.081158 H Child_5_49.log  |           |           |
| 6  | -3.879430                                                     | 3.619149  | -0.135469 |
| 6  | 1.887702                                                      | -1.318821 | -0.555933 |
| 8  | -3.430276                                                     | 2.593056  | -0.390166 |
| 12 | 2.951392                                                      | 2.104711  | -0.093426 |
| 6  | -0.552734                                                     | -0.176183 | 1.711276  |
| 12 | 0.247066                                                      | -2.592121 | -0.141286 |
| 6  | 0.155454                                                      | 0.948167  | 1.561515  |
| 6  | 2.774113                                                      | -0.250139 | -0.820909 |
| 6  | -2.788339                                                     | -1.431411 | -0.993784 |
| 6  | 1.672013                                                      | 0.014376  | -0.023474 |
| 6  | -0.462007                                                     | -1.588796 | 2.080954  |
| 6  | -1.746162                                                     | -1.688583 | -0.208460 |
| 6  | 1.205198                                                      | 1.115812  | 0.719660  |
| 8  | 3.766207                                                      | 0.500270  | -1.204273 |
| 6  | -1.312953                                                     | -1.186197 | 1.036901  |
| 6  | -3.797680                                                     | -1.206987 | -1.776934 |
| 16 | 189.873684 Kcal/mol 8.233713 eV -101.081097 H Child_10_29.log |           |           |
| 6  | 4.525522                                                      | 0.989813  | -0.101806 |
| 8  | -2.842315                                                     | 1.737846  | 0.807818  |

|                                                               |           |           |           |
|---------------------------------------------------------------|-----------|-----------|-----------|
| 6                                                             | 3.141942  | -1.447046 | 0.293965  |
| 6                                                             | -0.406101 | 1.598845  | 0.100000  |
| 6                                                             | 3.605782  | -0.155669 | 0.103919  |
| 6                                                             | -1.697062 | 1.595916  | -0.136132 |
| 6                                                             | 2.438095  | -2.481093 | 0.446796  |
| 6                                                             | -3.441164 | 0.616490  | 0.133545  |
| 6                                                             | 3.097699  | 1.076014  | -0.086114 |
| 6                                                             | -2.456420 | 0.554535  | -0.867469 |
| 12                                                            | 0.712757  | -1.292332 | 0.034457  |
| 12                                                            | -3.300397 | -1.451978 | 0.489456  |
| 8                                                             | 1.946111  | 1.753576  | -0.183850 |
| 6                                                             | -1.860866 | -0.707982 | -1.128803 |
| 6                                                             | 0.762268  | 0.990536  | 0.115876  |
| 6                                                             | -1.339475 | -1.796968 | -0.753560 |
| 16                                                            |           |           |           |
| 189.939354 Kcal/mol 8.236560 eV -101.080993 H Child_16_23.log |           |           |           |
| 8                                                             | -2.478680 | 3.283104  | 1.713548  |
| 8                                                             | 3.744960  | 1.344838  | -0.364668 |
| 12                                                            | -4.698501 | -1.855928 | -0.445039 |
| 6                                                             | 3.611646  | 0.059660  | -0.006498 |
| 6                                                             | 3.158001  | -1.029469 | 0.279704  |
| 6                                                             | -2.561147 | -0.967377 | -0.507488 |
| 6                                                             | 2.544781  | 1.929571  | -0.648500 |
| 6                                                             | -1.828966 | 2.973685  | 0.907922  |
| 6                                                             | 2.405857  | -2.153844 | 0.536110  |
| 6                                                             | -1.707743 | 0.064775  | -0.580459 |
| 6                                                             | 2.074208  | -3.478081 | 0.915777  |
| 6                                                             | -1.151321 | -1.299202 | -0.188655 |
| 6                                                             | 1.393510  | 2.289060  | -0.863322 |
| 12                                                            | -0.566689 | 1.828055  | -0.693931 |
| 6                                                             | 1.051908  | -2.494804 | 0.471766  |
| 6                                                             | -0.148725 | -2.008816 | 0.163075  |
| 16                                                            |           |           |           |
| 189.947340 Kcal/mol 8.236907 eV -101.080980 H Child_6_27.log  |           |           |           |
| 12                                                            | 4.047393  | 1.693837  | 1.261845  |
| 6                                                             | -6.473898 | 1.421619  | -0.048309 |
| 6                                                             | 2.395038  | -1.536231 | -1.593699 |
| 8                                                             | -5.379545 | 1.758364  | -0.029827 |
| 12                                                            | 3.627246  | -0.136423 | -0.772682 |
| 6                                                             | -1.903994 | -3.733155 | 1.893709  |
| 8                                                             | 2.232204  | 1.486544  | 0.655678  |
| 6                                                             | -2.133455 | 1.751864  | -0.916173 |
| 6                                                             | 0.922233  | 1.498544  | 0.511799  |
| 6                                                             | -1.450181 | -2.780938 | 1.163820  |
| 6                                                             | 1.200867  | -1.688060 | -1.311823 |
| 6                                                             | -1.003084 | -1.861875 | 0.284121  |
| 6                                                             | -0.179991 | 1.062680  | 0.146406  |
| 6                                                             | -1.358420 | 0.701763  | -0.606468 |
| 6                                                             | -0.085116 | -1.601974 | -0.789220 |
| 6                                                             | -1.082821 | -0.675609 | -0.546958 |
| 16                                                            |           |           |           |
| 190.017902 Kcal/mol 8.239966 eV -101.080868 H Child_2_28.log  |           |           |           |
| 6                                                             | 7.864338  | -0.974222 | 0.395514  |
| 8                                                             | -1.672585 | -3.556559 | -0.622557 |
| 6                                                             | 6.613084  | -0.622337 | 0.370988  |

|                                                               |           |           |           |
|---------------------------------------------------------------|-----------|-----------|-----------|
| 6                                                             | -2.093929 | -2.473429 | -0.292977 |
| 6                                                             | 5.365927  | -0.244771 | 0.288785  |
| 12                                                            | -4.865775 | -0.258329 | 0.228258  |
| 6                                                             | 4.177751  | 0.150596  | 0.181175  |
| 6                                                             | -1.932958 | -1.088217 | 0.107792  |
| 6                                                             | 2.951595  | 0.605046  | 0.025222  |
| 6                                                             | -4.707372 | 1.734171  | 0.579183  |
| 6                                                             | 1.777909  | 0.999516  | -0.112754 |
| 6                                                             | -3.209888 | -1.566712 | -0.011710 |
| 6                                                             | 0.524465  | 1.617625  | -0.479276 |
| 6                                                             | -3.446262 | 1.628915  | 0.612126  |
| 12                                                            | -1.441727 | 1.130031  | 0.309226  |
| 8                                                             | 0.720342  | 2.424370  | -1.431722 |
| 16                                                            |           |           |           |
| 190.500118 Kcal/mol 8.260877 eV -101.080099 H Child_10_63.log |           |           |           |
| 8                                                             | 4.987738  | 0.989335  | 0.023379  |
| 6                                                             | -5.836926 | -0.429033 | -0.056857 |
| 6                                                             | 2.537409  | 1.539071  | -0.047894 |
| 8                                                             | -3.522086 | -1.580511 | -0.050587 |
| 6                                                             | 3.754274  | 1.547422  | -0.005618 |
| 6                                                             | -5.117460 | 0.674802  | 0.069731  |
| 6                                                             | 1.185567  | 1.363237  | -0.045255 |
| 6                                                             | -2.567903 | -0.857290 | -0.027382 |
| 6                                                             | 4.847697  | -0.391053 | -0.018563 |
| 12                                                            | -0.333688 | -1.306764 | 0.000334  |
| 6                                                             | -0.032837 | 1.065192  | -0.024419 |
| 6                                                             | -4.175289 | 1.540139  | 0.085021  |
| 6                                                             | 3.976459  | -1.257190 | 0.007817  |
| 12                                                            | -2.109125 | 1.301581  | 0.001853  |
| 6                                                             | 2.794445  | -1.910942 | 0.024213  |
| 6                                                             | 1.565988  | -2.085757 | 0.071108  |
| 16                                                            |           |           |           |
| 190.776656 Kcal/mol 8.272869 eV -101.079658 H Child_8_43.log  |           |           |           |
| 8                                                             | 4.803863  | 2.402246  | -0.973710 |
| 8                                                             | -4.471425 | 0.412555  | -0.117413 |
| 6                                                             | 3.881360  | 1.767044  | -0.553498 |
| 6                                                             | -3.641302 | 1.484647  | 0.390888  |
| 6                                                             | 3.974943  | -2.241665 | 1.497692  |
| 6                                                             | -3.892222 | 2.610434  | 1.048293  |
| 6                                                             | 2.999221  | -1.718071 | 0.840574  |
| 12                                                            | -2.351502 | -2.084715 | -0.819853 |
| 6                                                             | 2.809701  | 1.214093  | -0.115940 |
| 6                                                             | -3.198443 | -0.306851 | -0.317327 |
| 6                                                             | 1.980017  | -1.106524 | 0.194019  |
| 12                                                            | -0.294798 | 0.767277  | 0.342615  |
| 6                                                             | 0.800092  | -1.751937 | -0.274394 |
| 6                                                             | 1.834208  | 0.365811  | 0.178206  |
| 6                                                             | -0.327333 | -2.144080 | -0.614756 |
| 6                                                             | -2.370894 | 0.708906  | 0.135550  |
| 16                                                            |           |           |           |
| 191.217209 Kcal/mol 8.291973 eV -101.078956 H MutD_14_78.log  |           |           |           |
| 6                                                             | 3.590414  | 0.047777  | 0.237873  |
| 8                                                             | 0.145107  | 2.724475  | -0.859458 |
| 8                                                             | 1.529418  | -1.213737 | -1.352742 |
| 6                                                             | 1.864531  | 1.866828  | 0.541580  |

|                                                               |           |           |           |
|---------------------------------------------------------------|-----------|-----------|-----------|
| 6                                                             | -0.046911 | -0.020879 | 1.603699  |
| 6                                                             | -2.728465 | 0.911766  | -0.350373 |
| 6                                                             | 2.976429  | 1.143392  | 0.534654  |
| 6                                                             | -0.292952 | 0.866732  | 0.583840  |
| 12                                                            | 0.252730  | -1.990534 | 0.104730  |
| 6                                                             | 0.549047  | 1.946973  | 0.064937  |
| 6                                                             | 2.234532  | -1.714491 | -0.500303 |
| 12                                                            | -3.679289 | -1.060453 | 0.210244  |
| 6                                                             | -3.957241 | 0.906803  | -0.803927 |
| 6                                                             | -1.555784 | 0.316933  | 0.125427  |
| 6                                                             | -1.563622 | -1.062603 | 0.518560  |
| 6                                                             | 3.550441  | -1.121575 | -0.236314 |
| 16                                                            |           |           |           |
| 191.318186 Kcal/mol 8.296352 eV -101.078795 H MutI_16_41.log  |           |           |           |
| 6                                                             | -2.238374 | -0.528260 | 0.250576  |
| 12                                                            | -6.230450 | -1.585606 | -0.001342 |
| 6                                                             | 4.615363  | 2.286111  | 0.131237  |
| 8                                                             | 2.464916  | -1.392516 | 1.012006  |
| 6                                                             | -0.031659 | -1.339549 | 0.880389  |
| 6                                                             | -0.449844 | 1.099644  | 0.134721  |
| 6                                                             | -0.880695 | -0.348021 | 0.471809  |
| 6                                                             | 0.827376  | 1.551578  | 0.111879  |
| 6                                                             | 1.282345  | -1.285943 | 1.012753  |
| 6                                                             | -1.646412 | 1.814411  | -0.180026 |
| 8                                                             | 5.703933  | -1.598345 | -1.084681 |
| 6                                                             | -2.851705 | 2.056664  | -0.455010 |
| 6                                                             | 5.310284  | -2.677944 | -0.979783 |
| 6                                                             | 3.332437  | 2.099993  | 0.237379  |
| 6                                                             | 2.029624  | 1.903373  | 0.158112  |
| 12                                                            | -3.864819 | 0.263485  | -0.837226 |
| 16                                                            |           |           |           |
| 191.619286 Kcal/mol 8.309409 eV -101.078316 H Child_6_61.log  |           |           |           |
| 6                                                             | -1.322479 | -3.371321 | -0.286543 |
| 12                                                            | 4.140618  | 0.974299  | 0.113970  |
| 6                                                             | -1.678469 | -1.945426 | -0.029151 |
| 6                                                             | 0.930145  | 1.106535  | 0.673282  |
| 8                                                             | -5.176949 | 0.830605  | 0.096540  |
| 6                                                             | -0.381965 | 1.402712  | 0.744637  |
| 6                                                             | -2.723786 | 0.394277  | 0.288692  |
| 6                                                             | 6.130741  | 0.725612  | -0.288133 |
| 6                                                             | -2.383049 | -0.895622 | 0.168486  |
| 6                                                             | 2.060796  | 0.559469  | 0.547870  |
| 6                                                             | -0.296962 | -2.498300 | -0.080841 |
| 6                                                             | -1.587381 | 1.149952  | 0.633656  |
| 6                                                             | -4.041696 | 1.038974  | -0.325119 |
| 6                                                             | 5.533401  | 0.038335  | -1.203614 |
| 12                                                            | 1.529278  | -1.470588 | 0.287651  |
| 8                                                             | -3.507367 | 1.634932  | -1.331387 |
| 16                                                            |           |           |           |
| 191.857867 Kcal/mol 8.319755 eV -101.077935 H Child_10_27.log |           |           |           |
| 6                                                             | -2.053099 | -2.265730 | 0.162789  |
| 8                                                             | 1.183591  | 2.208110  | 0.376901  |
| 6                                                             | -0.802899 | -2.117644 | 0.116942  |
| 6                                                             | 2.302148  | 1.677452  | 0.222851  |
| 6                                                             | 0.505268  | -1.492081 | 0.073488  |

|                                                              |           |           |           |
|--------------------------------------------------------------|-----------|-----------|-----------|
| 12                                                           | -0.675375 | 1.699671  | 0.199296  |
| 12                                                           | -3.941918 | -1.381465 | 0.181336  |
| 6                                                            | 3.388505  | 1.087283  | 0.055018  |
| 6                                                            | 1.853966  | -1.720203 | -0.118086 |
| 6                                                            | -2.578415 | 2.284897  | -0.479290 |
| 6                                                            | -0.245885 | -0.396924 | 0.264905  |
| 6                                                            | 4.590184  | 0.463714  | -0.169474 |
| 6                                                            | 3.062596  | -1.542871 | -0.215989 |
| 6                                                            | -3.534966 | 1.392219  | -0.364597 |
| 6                                                            | -4.537346 | 0.527880  | -0.393674 |
| 8                                                            | 4.279804  | -1.108914 | -0.314010 |
| 16                                                           |           |           |           |
| 192.003894 Kcal/mol 8.326087 eV -101.077703 H MutD_14_66.log |           |           |           |
| 12                                                           | -3.969401 | -0.563997 | 0.297628  |
| 6                                                            | 1.466485  | -1.226998 | -0.803448 |
| 6                                                            | -7.508875 | 1.687697  | -0.269959 |
| 6                                                            | 7.424913  | 0.930457  | 0.074867  |
| 6                                                            | 6.363400  | 0.363332  | -0.464954 |
| 6                                                            | 9.311046  | 2.182111  | 1.351897  |
| 8                                                            | -8.484310 | 2.381763  | -0.493803 |
| 12                                                           | 3.392342  | -0.777310 | -1.202725 |
| 6                                                            | 5.314986  | -0.159428 | -0.921683 |
| 6                                                            | -0.806992 | -1.673833 | 0.424248  |
| 6                                                            | -2.145339 | -1.435572 | 0.601539  |
| 6                                                            | 8.353994  | 1.549783  | 0.691847  |
| 6                                                            | 0.362000  | -1.442488 | -0.264792 |
| 6                                                            | -6.784207 | 0.713786  | 0.195970  |
| 8                                                            | -5.579218 | 0.246329  | 0.225026  |
| 6                                                            | -1.445923 | -2.310358 | 1.553032  |
| 16                                                           |           |           |           |
| 192.386490 Kcal/mol 8.342678 eV -101.077093 H Child_5_16.log |           |           |           |
| 12                                                           | -2.186770 | -0.542018 | 0.112854  |
| 6                                                            | 4.977163  | 1.447993  | -0.577847 |
| 6                                                            | -4.178313 | -0.492918 | -0.716525 |
| 6                                                            | 3.496811  | 1.478574  | -0.326019 |
| 6                                                            | -5.319906 | -0.406299 | -1.485968 |
| 6                                                            | 2.258361  | 1.785504  | -0.133927 |
| 6                                                            | -5.314293 | 0.262645  | -0.119323 |
| 6                                                            | 4.354807  | 0.266907  | -0.291182 |
| 6                                                            | -0.535348 | -1.791641 | 0.238802  |
| 6                                                            | 0.986072  | 1.826825  | 0.148702  |
| 6                                                            | -5.685827 | 0.985223  | 0.944828  |
| 8                                                            | 4.141621  | -0.973696 | -0.065206 |
| 6                                                            | 0.642570  | -2.195951 | 0.355367  |
| 6                                                            | -0.207595 | 1.561188  | 0.433821  |
| 12                                                           | 2.608898  | -2.011869 | 0.255907  |
| 8                                                            | -1.380690 | 1.258490  | 0.659019  |
| 16                                                           |           |           |           |
| 192.930711 Kcal/mol 8.366278 eV -101.076226 H MutI_11_71.log |           |           |           |
| 8                                                            | 0.984453  | -1.875608 | 0.158642  |
| 6                                                            | -4.257730 | 0.794601  | 1.900342  |
| 6                                                            | -1.432978 | -2.283607 | -0.548024 |
| 6                                                            | -2.915347 | -0.252280 | -0.083112 |
| 6                                                            | 0.465403  | 2.717132  | -0.765167 |
| 6                                                            | -2.296676 | -1.443360 | -0.376274 |

|                                                                   |           |           |           |
|-------------------------------------------------------------------|-----------|-----------|-----------|
| 6                                                                 | -3.697441 | 0.175283  | 0.931558  |
| 6                                                                 | 2.958733  | 2.162642  | -0.349248 |
| 6                                                                 | 2.194360  | -1.494835 | 0.613628  |
| 6                                                                 | 3.318613  | -1.149365 | 0.975974  |
| 6                                                                 | -0.766928 | 2.863179  | -0.679567 |
| 8                                                                 | -0.464359 | -3.131884 | -0.888896 |
| 12                                                                | 3.975584  | 0.749247  | 0.663469  |
| 12                                                                | -2.451778 | 1.815606  | -0.337619 |
| 6                                                                 | 1.804432  | 2.482544  | -0.668172 |
| 6                                                                 | 0.884489  | -3.024983 | -0.629966 |
| 16                                                                |           |           |           |
| 192.967658 Kcal/mol 8.367880 eV -101.076167 H Original3D_16_4.log |           |           |           |
| 8                                                                 | 1.927751  | 0.180908  | 0.689089  |
| 6                                                                 | -0.893391 | -0.158345 | -0.809719 |
| 6                                                                 | -1.144434 | -1.123822 | 0.301139  |
| 6                                                                 | -1.503937 | 0.779200  | 1.912793  |
| 6                                                                 | 1.532117  | 0.844129  | 1.673180  |
| 12                                                                | -3.720939 | 1.129126  | -1.721923 |
| 6                                                                 | 0.839253  | -2.556161 | -0.265686 |
| 12                                                                | 1.259190  | -0.671656 | -1.002958 |
| 6                                                                 | -1.850304 | 0.055337  | 0.803152  |
| 6                                                                 | 0.148954  | -3.644461 | 0.237793  |
| 6                                                                 | 2.731948  | 0.893741  | -1.620443 |
| 6                                                                 | 0.895475  | 1.540583  | 2.486508  |
| 8                                                                 | 3.370140  | 1.818231  | -1.799584 |
| 6                                                                 | -0.426366 | -2.290912 | 0.420083  |
| 6                                                                 | -1.996443 | 0.730701  | -0.566016 |
| 6                                                                 | -0.473228 | 1.349551  | 2.357641  |
| 16                                                                |           |           |           |
| 193.184306 Kcal/mol 8.377275 eV -101.075822 H Child_2_26.log      |           |           |           |
| 8                                                                 | -4.416973 | -2.944912 | -0.708551 |
| 12                                                                | 2.134598  | 2.805329  | -0.057609 |
| 6                                                                 | -3.887915 | -1.975016 | -0.327664 |
| 6                                                                 | 0.307540  | 2.177495  | 0.491052  |
| 6                                                                 | 1.715671  | -4.259681 | 0.616270  |
| 6                                                                 | 4.152309  | 2.333612  | -0.438790 |
| 8                                                                 | -3.319738 | -1.006220 | 0.064579  |
| 6                                                                 | 4.476072  | 1.118699  | -0.488652 |
| 6                                                                 | 2.688168  | -3.425868 | 0.364786  |
| 12                                                                | -2.784506 | 1.096923  | 0.415968  |
| 6                                                                 | 3.494767  | -2.458846 | 0.112012  |
| 6                                                                 | 4.564876  | -0.193073 | -0.349139 |
| 6                                                                 | 4.143362  | -1.374756 | -0.162766 |
| 6                                                                 | -0.806371 | 1.694515  | 0.744680  |
| 6                                                                 | -4.809550 | 1.889013  | 0.410021  |
| 6                                                                 | -4.423499 | 1.937576  | -0.829896 |
| 16                                                                |           |           |           |
| 193.327966 Kcal/mol 8.383505 eV -101.075593 H Child_1_52.log      |           |           |           |
| 6                                                                 | -2.379557 | -1.594697 | 0.059586  |
| 6                                                                 | 1.976955  | 1.119797  | -1.689850 |
| 6                                                                 | -1.549553 | -2.504356 | 0.514574  |
| 6                                                                 | 2.623903  | 1.959236  | -0.852648 |
| 6                                                                 | -2.496121 | -0.142875 | -0.058872 |
| 6                                                                 | 2.345721  | 1.945688  | 0.475065  |
| 6                                                                 | -0.744847 | -1.151057 | 0.933318  |

|                                                                   |           |           |           |
|-------------------------------------------------------------------|-----------|-----------|-----------|
| 6                                                                 | 3.568656  | -2.061591 | 0.458055  |
| 6                                                                 | -3.538883 | 0.618054  | -0.340207 |
| 8                                                                 | 2.579790  | -2.253845 | -0.104971 |
| 6                                                                 | -1.215313 | 0.193413  | 0.628935  |
| 6                                                                 | 1.987755  | 1.944734  | 1.699206  |
| 8                                                                 | -4.424600 | 1.361160  | -0.541064 |
| 6                                                                 | 1.346541  | 0.344005  | -2.488609 |
| 12                                                                | 0.265992  | 0.801917  | 1.921467  |
| 12                                                                | 0.001252  | -0.541969 | -1.160053 |
| 16                                                                |           |           |           |
| 193.626809 Kcal/mol 8.396464 eV -101.075116 H Original3D_0_70.log |           |           |           |
| 6                                                                 | 0.170058  | -0.899722 | 0.347661  |
| 6                                                                 | 0.614473  | -2.310073 | -0.061499 |
| 6                                                                 | 0.891103  | 0.081190  | 0.827835  |
| 6                                                                 | -1.399773 | -1.020009 | 0.149762  |
| 6                                                                 | -2.354677 | 0.051484  | 0.063595  |
| 6                                                                 | -1.924870 | 1.430027  | 0.013208  |
| 8                                                                 | 3.011955  | -3.047241 | -0.170859 |
| 6                                                                 | -3.689812 | -0.287331 | 0.066672  |
| 12                                                                | -4.393721 | 1.703267  | -0.861553 |
| 6                                                                 | -1.567633 | 2.640724  | -0.051879 |
| 6                                                                 | -1.601501 | -2.361372 | -0.078523 |
| 6                                                                 | 6.183045  | 1.840893  | -0.037313 |
| 8                                                                 | 6.080895  | 2.652592  | -0.842287 |
| 12                                                                | -0.008476 | 1.877064  | 1.129025  |
| 6                                                                 | 1.906231  | -2.681484 | -0.151818 |
| 6                                                                 | -0.546051 | -3.118791 | -0.271785 |
| 16                                                                |           |           |           |
| 193.674235 Kcal/mol 8.398520 eV -101.075041 H Child_7_46.log      |           |           |           |
| 6                                                                 | -3.757271 | 1.683646  | -0.203806 |
| 8                                                                 | 6.473906  | 0.371100  | -0.128990 |
| 6                                                                 | -2.479323 | 2.119942  | 0.015236  |
| 6                                                                 | 5.282522  | 0.308935  | -0.101853 |
| 6                                                                 | -4.837204 | 1.080926  | -0.400993 |
| 6                                                                 | 0.675670  | -1.775592 | -0.207264 |
| 6                                                                 | -1.251992 | 2.208728  | 0.188373  |
| 6                                                                 | 3.990432  | 0.193840  | -0.094553 |
| 12                                                                | 0.451783  | 1.072662  | 0.374796  |
| 6                                                                 | 1.925719  | -1.671674 | -0.357132 |
| 12                                                                | -4.524419 | -0.914578 | -0.335362 |
| 6                                                                 | 2.611605  | 0.679177  | 0.145950  |
| 6                                                                 | 2.803991  | -0.637400 | -0.205706 |
| 8                                                                 | -1.673806 | -1.531816 | 0.264320  |
| 6                                                                 | -2.810595 | -1.884673 | 0.736812  |
| 6                                                                 | -0.408417 | -1.074401 | 0.225630  |
| 16                                                                |           |           |           |
| 194.034157 Kcal/mol 8.414128 eV -101.074467 H MutD_17_52.log      |           |           |           |
| 6                                                                 | -7.784084 | -1.292401 | 0.167730  |
| 6                                                                 | 2.862740  | 0.744769  | 0.613218  |
| 6                                                                 | 1.265797  | -3.486101 | 0.346671  |
| 6                                                                 | -1.260874 | 0.582556  | -0.805871 |
| 8                                                                 | -0.431870 | -1.816909 | -0.486747 |
| 6                                                                 | 0.138424  | 3.790542  | 0.058484  |
| 6                                                                 | 2.735795  | -3.042467 | 0.055516  |
| 6                                                                 | 2.101736  | -1.692598 | 0.003729  |

|                                                               |           |           |           |
|---------------------------------------------------------------|-----------|-----------|-----------|
| 6                                                             | 2.541706  | -0.434849 | 0.414926  |
| 8                                                             | -6.824178 | -1.001260 | 0.734786  |
| 12                                                            | -1.342084 | 2.568092  | -0.570768 |
| 6                                                             | 3.910755  | -3.606969 | -0.126836 |
| 6                                                             | 1.214943  | 4.449455  | 0.216799  |
| 12                                                            | 2.282463  | 2.699879  | 0.370356  |
| 6                                                             | -0.772981 | -0.540860 | -0.633969 |
| 6                                                             | 0.840013  | -2.249459 | -0.240292 |
| 16                                                            |           |           |           |
| 194.881829 Kcal/mol 8.450887 eV -101.073116 H Child_13_14.log |           |           |           |
| 6                                                             | 4.951445  | 2.480558  | -0.000077 |
| 12                                                            | -3.176049 | -2.795898 | 0.169336  |
| 8                                                             | 6.580125  | -0.613997 | 0.221199  |
| 6                                                             | -1.724840 | -1.267442 | 0.127055  |
| 6                                                             | 3.732081  | 2.086195  | 0.040634  |
| 6                                                             | -6.257038 | 2.516821  | 0.023983  |
| 6                                                             | 5.475816  | -0.929883 | 0.013909  |
| 8                                                             | -5.654915 | 1.533087  | -0.086350 |
| 6                                                             | 4.268740  | -1.339345 | -0.231983 |
| 12                                                            | -4.511640 | -0.330647 | -0.100530 |
| 6                                                             | 2.508432  | 1.627010  | 0.040757  |
| 6                                                             | -2.430441 | -0.081846 | -0.005725 |
| 6                                                             | 3.071311  | -1.768103 | -0.462579 |
| 6                                                             | -0.966296 | -0.023457 | 0.052442  |
| 6                                                             | 1.334105  | 1.146478  | 0.042448  |
| 6                                                             | 0.178449  | 0.580651  | 0.041724  |
| 16                                                            |           |           |           |
| 195.109064 Kcal/mol 8.460740 eV -101.072754 H Child_1_31.log  |           |           |           |
| 12                                                            | 1.107662  | -2.874546 | 0.141172  |
| 8                                                             | 4.214628  | 2.898334  | -0.713356 |
| 6                                                             | -2.772996 | -2.946752 | -1.078530 |
| 6                                                             | 3.610307  | 1.928858  | -0.408745 |
| 6                                                             | -2.052672 | -2.130537 | -0.379555 |
| 6                                                             | -5.821846 | 1.767787  | 0.174970  |
| 6                                                             | 2.623783  | -1.640811 | -0.333852 |
| 8                                                             | -6.451067 | 2.047295  | -0.711868 |
| 6                                                             | -0.155194 | -1.317689 | 0.755713  |
| 6                                                             | 2.860665  | 0.836020  | -0.144229 |
| 6                                                             | 0.561111  | 1.954493  | 0.502559  |
| 6                                                             | 3.262256  | -0.431224 | -0.438736 |
| 6                                                             | -1.371094 | -1.170905 | 0.229141  |
| 6                                                             | 1.442077  | 0.923199  | 0.410058  |
| 6                                                             | 0.856861  | -0.436048 | 0.614811  |
| 12                                                            | -1.138331 | 0.909264  | 0.857174  |
| 16                                                            |           |           |           |
| 195.109701 Kcal/mol 8.460768 eV -101.072753 H Child_5_11.log  |           |           |           |
| 6                                                             | 1.132727  | 3.968522  | 0.462104  |
| 6                                                             | -4.194059 | -0.341396 | -0.084886 |
| 6                                                             | 1.817992  | 2.725137  | 0.240698  |
| 12                                                            | -2.097457 | -1.176407 | 0.118528  |
| 6                                                             | 0.427133  | 2.617262  | 0.331120  |
| 6                                                             | -3.432622 | 0.671808  | -0.196697 |
| 6                                                             | 2.332897  | 1.481128  | -0.210299 |
| 8                                                             | -0.908865 | -2.555550 | 0.262454  |
| 6                                                             | 0.038564  | 1.315583  | -0.086913 |



|                                                               |           |           |           |
|---------------------------------------------------------------|-----------|-----------|-----------|
| 6                                                             | 0.319171  | -2.929339 | 0.221134  |
| 6                                                             | 2.580362  | 0.147242  | -0.332116 |
| 6                                                             | -2.410949 | 1.627733  | -0.302180 |
| 6                                                             | 1.173759  | 0.599701  | -0.432989 |
| 6                                                             | 1.516614  | -3.293934 | 0.169615  |
| 12                                                            | 2.896520  | -1.926936 | -0.117527 |
| 8                                                             | -1.265923 | 0.768479  | -0.097900 |
| 16                                                            |           |           |           |
| 195.366552 Kcal/mol 8.471906 eV -101.072344 H Child_10_33.log |           |           |           |
| 6                                                             | 4.106143  | 0.364376  | 1.079327  |
| 8                                                             | -1.687950 | 0.015616  | 2.583062  |
| 6                                                             | 3.326654  | 1.105431  | 0.411369  |
| 6                                                             | -1.202426 | -0.524840 | 1.706010  |
| 12                                                            | 2.983307  | -1.350196 | 0.269433  |
| 8                                                             | -2.560716 | 2.111872  | 0.527939  |
| 6                                                             | 2.271738  | 1.318030  | -0.455789 |
| 6                                                             | -3.229254 | 2.904098  | 0.025531  |
| 6                                                             | 1.268013  | 1.918838  | -1.135486 |
| 12                                                            | 0.071536  | -1.679901 | 0.105315  |
| 6                                                             | 1.688085  | -0.031311 | -1.092030 |
| 6                                                             | -3.742413 | -2.172591 | -0.356605 |
| 6                                                             | 0.479314  | 0.501952  | -1.400959 |
| 6                                                             | -2.823305 | -1.457527 | -0.876407 |
| 6                                                             | -1.816339 | -0.681847 | -1.288863 |
| 6                                                             | -0.771008 | -0.021067 | -1.513595 |
| 16                                                            |           |           |           |
| 195.835349 Kcal/mol 8.492235 eV -101.071597 H MutI_11_65.log  |           |           |           |
| 6                                                             | 2.725125  | -0.384741 | 0.198216  |
| 8                                                             | 4.110797  | 0.090768  | 0.236888  |
| 12                                                            | -0.039925 | 1.403730  | 0.569143  |
| 6                                                             | 2.436717  | -1.870899 | -0.001304 |
| 6                                                             | 1.804913  | 0.573221  | -0.232072 |
| 6                                                             | -2.568797 | -0.408179 | 0.246723  |
| 6                                                             | 1.885334  | 1.972853  | -0.549730 |
| 6                                                             | -6.457125 | -0.041968 | -0.059261 |
| 6                                                             | 4.127425  | 1.339683  | -0.037967 |
| 8                                                             | 3.195806  | -2.798094 | 0.292426  |
| 6                                                             | -3.922181 | -0.351026 | 0.187483  |
| 6                                                             | -7.545624 | 0.593963  | -0.242757 |
| 6                                                             | -1.248570 | -0.373884 | 0.180335  |
| 6                                                             | 3.412925  | 2.385421  | -0.227288 |
| 12                                                            | 0.405270  | -1.216089 | -0.720041 |
| 6                                                             | -5.122970 | -0.199956 | 0.133667  |
| 16                                                            |           |           |           |
| 196.413098 Kcal/mol 8.517289 eV -101.070676 H Child_2_25.log  |           |           |           |
| 6                                                             | -1.340286 | -2.174879 | -0.000000 |
| 8                                                             | -1.186362 | 3.089130  | -0.000000 |
| 6                                                             | -2.670741 | -2.200821 | -0.000000 |
| 6                                                             | 6.485653  | 1.213007  | 0.000000  |
| 6                                                             | -3.935708 | -2.062190 | -0.000000 |
| 6                                                             | -3.399007 | 1.772237  | -0.000000 |
| 6                                                             | -0.212728 | -1.531927 | -0.000000 |
| 6                                                             | 5.356716  | 0.577698  | 0.000000  |
| 12                                                            | 1.902793  | -2.362256 | 0.000000  |
| 6                                                             | -2.357847 | 2.436108  | -0.000000 |

|                                                                   |           |           |           |
|-------------------------------------------------------------------|-----------|-----------|-----------|
| 6                                                                 | 0.000000  | -0.167333 | -0.000000 |
| 6                                                                 | 4.197127  | 0.027992  | 0.000000  |
| 12                                                                | -4.299198 | -0.023885 | -0.000000 |
| 6                                                                 | 0.068183  | 2.458230  | 0.000000  |
| 6                                                                 | -0.039652 | 1.075269  | 0.000000  |
| 8                                                                 | 3.167187  | -0.577462 | 0.000000  |
| 16                                                                |           |           |           |
| 196.685063 Kcal/mol 8.529082 eV -101.070243 H Original3D_6_7.log  |           |           |           |
| 6                                                                 | 0.939213  | -1.407305 | -0.349251 |
| 6                                                                 | 0.402975  | -0.222800 | 0.174062  |
| 12                                                                | -1.332486 | 2.244827  | 0.407701  |
| 6                                                                 | -2.344061 | -2.262547 | -0.113548 |
| 6                                                                 | -3.360552 | 2.555227  | 0.066396  |
| 6                                                                 | 0.085325  | 0.793506  | 0.878495  |
| 6                                                                 | -3.566871 | 0.001851  | -0.406320 |
| 6                                                                 | 0.143503  | -2.384578 | -1.032729 |
| 8                                                                 | -1.156956 | -2.237125 | -0.728950 |
| 6                                                                 | 4.101060  | 1.988317  | -2.212366 |
| 12                                                                | 1.899510  | 0.065608  | 2.047455  |
| 8                                                                 | 4.030748  | 1.505301  | -1.173652 |
| 6                                                                 | 3.074680  | -1.347184 | 1.152463  |
| 6                                                                 | -3.105540 | -1.142249 | -0.526373 |
| 6                                                                 | 2.265276  | -1.563869 | 0.206167  |
| 6                                                                 | -3.600777 | 1.346525  | -0.210506 |
| 16                                                                |           |           |           |
| 196.792736 Kcal/mol 8.533751 eV -101.070071 H Child_1_63.log      |           |           |           |
| 6                                                                 | 2.884567  | -3.597813 | 0.140931  |
| 8                                                                 | 1.022322  | 3.334287  | -0.062733 |
| 6                                                                 | 2.177654  | -2.507348 | 0.068878  |
| 6                                                                 | 1.455469  | 2.185339  | -0.071178 |
| 8                                                                 | 2.939014  | 0.473776  | 0.081066  |
| 6                                                                 | -3.799085 | -0.272916 | 0.054527  |
| 6                                                                 | 1.289610  | -1.498501 | 0.016076  |
| 6                                                                 | -2.772083 | -0.269255 | -0.984536 |
| 12                                                                | -0.841911 | -1.855151 | 0.266314  |
| 6                                                                 | -0.720037 | 0.755915  | -0.389970 |
| 6                                                                 | 1.546150  | -0.124597 | -0.146333 |
| 6                                                                 | 2.968303  | 1.789628  | 0.131335  |
| 6                                                                 | -2.932625 | -1.378655 | -0.033205 |
| 6                                                                 | -1.625297 | 0.347047  | -1.289792 |
| 6                                                                 | 0.680016  | 0.928824  | -0.260108 |
| 12                                                                | -2.375300 | 1.137608  | 1.103151  |
| 16                                                                |           |           |           |
| 197.510601 Kcal/mol 8.564881 eV -101.068927 H Original3D_16_3.log |           |           |           |
| 6                                                                 | -0.392588 | -1.202188 | 1.296378  |
| 6                                                                 | 0.048213  | -1.046752 | -0.092129 |
| 6                                                                 | 0.669744  | -0.729173 | 1.970100  |
| 6                                                                 | 0.297168  | -2.753822 | -0.709105 |
| 6                                                                 | -0.657908 | -1.946927 | -1.215957 |
| 6                                                                 | 2.064580  | 0.120654  | 0.433695  |
| 12                                                                | -0.588134 | 1.081264  | -1.429145 |
| 6                                                                 | -1.891124 | 1.816981  | 0.423857  |
| 6                                                                 | -1.452354 | -0.858194 | -1.243681 |
| 8                                                                 | -0.631140 | 2.161888  | 0.244888  |
| 6                                                                 | 1.139323  | -0.268384 | -0.593082 |

|                                                              |           |           |           |
|--------------------------------------------------------------|-----------|-----------|-----------|
| 6                                                            | 1.785023  | -0.114372 | 1.820753  |
| 6                                                            | -3.087680 | 1.445407  | 0.291844  |
| 6                                                            | 3.249459  | 0.564715  | -0.075187 |
| 8                                                            | 4.242672  | 0.817822  | -0.603673 |
| 12                                                           | -2.705482 | -0.581710 | 0.514592  |
| 16                                                           |           |           |           |
| 198.087454 Kcal/mol 8.589896 eV -101.068008 H MutD_13_64.log |           |           |           |
| 6                                                            | -2.107510 | 2.183394  | -0.107300 |
| 6                                                            | -1.181096 | -3.131064 | -0.466836 |
| 6                                                            | -0.026099 | -2.407040 | -0.144644 |
| 6                                                            | -1.149909 | -1.667605 | -0.064985 |
| 6                                                            | 1.289918  | 3.155418  | -0.053850 |
| 6                                                            | 0.044892  | 3.668832  | -0.117031 |
| 6                                                            | -1.074392 | 2.922896  | -0.118454 |
| 8                                                            | -5.590256 | -0.664554 | 0.299482  |
| 6                                                            | 2.123651  | -1.398035 | 0.013720  |
| 6                                                            | -4.474318 | -0.462997 | 0.200606  |
| 6                                                            | 2.429569  | 2.608351  | 0.013370  |
| 6                                                            | 4.732878  | -1.268938 | 0.232079  |
| 8                                                            | 1.340275  | -2.506400 | -0.031408 |
| 12                                                           | -2.197084 | 0.135152  | -0.025456 |
| 6                                                            | 3.475861  | -1.543959 | 0.181768  |
| 12                                                           | 2.988681  | 0.649191  | 0.062519  |
| 16                                                           |           |           |           |
| 198.983713 Kcal/mol 8.628761 eV -101.066580 H Child_5_34.log |           |           |           |
| 12                                                           | -0.080872 | 2.716148  | 0.019136  |
| 6                                                            | 0.192220  | -1.627915 | 0.118436  |
| 6                                                            | 1.762075  | 1.458179  | -0.017382 |
| 6                                                            | 1.493185  | -1.974210 | 0.119803  |
| 8                                                            | -1.591441 | 1.637478  | 0.065759  |
| 6                                                            | 2.731505  | -2.180295 | 0.071042  |
| 12                                                           | 3.747498  | 0.808601  | -0.090481 |
| 6                                                            | -5.079548 | -0.862440 | -0.102870 |
| 6                                                            | 0.806099  | 0.614219  | 0.001069  |
| 6                                                            | 3.951527  | -1.575794 | -0.027338 |
| 6                                                            | -1.588319 | 0.267366  | 0.053985  |
| 8                                                            | -3.885516 | -0.544914 | 0.413776  |
| 6                                                            | -6.291907 | -1.048853 | -0.447095 |
| 6                                                            | -0.251314 | -0.326194 | 0.054598  |
| 6                                                            | 4.991680  | -0.861050 | -0.182378 |
| 6                                                            | -2.747846 | -0.389262 | -0.138561 |
| 16                                                           |           |           |           |
| 199.125634 Kcal/mol 8.634916 eV -101.066353 H MutD_18_46.log |           |           |           |
| 8                                                            | 2.635399  | 2.878582  | -0.380602 |
| 6                                                            | 10.412502 | -2.349293 | -0.040817 |
| 12                                                           | -5.101316 | -0.269101 | 0.440599  |
| 6                                                            | 8.085728  | -1.214602 | -0.050538 |
| 6                                                            | 9.252198  | -1.779126 | -0.054492 |
| 6                                                            | 6.939741  | -0.672292 | -0.043982 |
| 6                                                            | -1.917676 | 0.828338  | 0.357015  |
| 6                                                            | 5.771108  | -0.146705 | -0.037238 |
| 6                                                            | 1.572760  | 2.396093  | -0.204737 |
| 6                                                            | -3.041122 | 0.302879  | 0.576968  |
| 8                                                            | 4.691946  | 0.328554  | -0.028651 |
| 6                                                            | -0.731535 | 1.364685  | 0.161974  |

|                                                                  |            |           |           |
|------------------------------------------------------------------|------------|-----------|-----------|
| 12                                                               | -7.857841  | -0.892092 | 0.062184  |
| 6                                                                | 0.406111   | 1.874907  | -0.021355 |
| 6                                                                | -9.775118  | -1.334351 | -0.192586 |
| 6                                                                | -10.826175 | -1.224329 | -0.910108 |
| 16                                                               |            |           |           |
| 199.316690 Kcal/mol 8.643201 eV -101.066049 H Child_13_29.log    |            |           |           |
| 6                                                                | -1.619388  | -0.781072 | 1.530100  |
| 6                                                                | 4.784355   | -0.791055 | -1.302746 |
| 12                                                               | -3.073543  | 0.188767  | 0.450240  |
| 6                                                                | 5.235554   | 0.262586  | -0.774985 |
| 6                                                                | -4.856412  | 0.755211  | -0.548801 |
| 12                                                               | 3.147802   | -2.028539 | -1.190556 |
| 6                                                                | -0.988106  | -1.340749 | 2.727337  |
| 6                                                                | 5.539804   | 1.404737  | -0.195338 |
| 6                                                                | -6.152349  | 0.955148  | -0.723123 |
| 6                                                                | 5.615558   | 2.497786  | 0.475173  |
| 6                                                                | 1.375743   | -2.279679 | -0.298999 |
| 8                                                                | -3.735993  | 0.978473  | -1.253057 |
| 6                                                                | 0.478451   | -1.973920 | 0.498327  |
| 6                                                                | 5.657481   | 3.673865  | 1.109221  |
| 6                                                                | -0.469539  | -1.516931 | 1.382799  |
| 8                                                                | -7.326258  | 1.131741  | -0.545693 |
| 16                                                               |            |           |           |
| 199.401125 Kcal/mol 8.646862 eV -101.065914 H Child_17_13.log    |            |           |           |
| 6                                                                | -1.366429  | -2.806327 | 0.284435  |
| 8                                                                | 4.162532   | 0.655578  | -1.195868 |
| 6                                                                | -2.314240  | -2.040741 | 0.110479  |
| 6                                                                | 1.510680   | 2.979581  | 1.688578  |
| 8                                                                | -3.299020  | -1.153516 | -0.074958 |
| 6                                                                | 2.023632   | 2.113623  | 0.858738  |
| 6                                                                | -4.253344  | 2.469682  | -0.520762 |
| 6                                                                | 3.182376   | 0.283313  | -0.528308 |
| 6                                                                | -3.502989  | 1.419572  | -0.347810 |
| 6                                                                | 2.120208   | 1.192115  | -0.109057 |
| 6                                                                | -2.908583  | 0.152534  | -0.186698 |
| 6                                                                | 2.836525   | -1.063155 | -0.173647 |
| 12                                                               | 0.583945   | -3.220285 | 0.373241  |
| 6                                                                | 2.281086   | -2.125606 | 0.129944  |
| 6                                                                | -1.897384  | 0.989147  | -0.188871 |
| 12                                                               | -0.015389  | 1.770374  | -0.034534 |
| 16                                                               |            |           |           |
| 199.628621 Kcal/mol 8.656727 eV -101.065552 H Original3D_5_4.log |            |           |           |
| 6                                                                | -2.135655  | 1.586112  | 0.130918  |
| 6                                                                | -0.693166  | 1.029663  | 0.405724  |
| 12                                                               | 1.266121   | 1.819216  | 0.008011  |
| 6                                                                | 5.683136   | -1.192213 | -0.077173 |
| 6                                                                | -3.086851  | 0.436467  | 0.059885  |
| 6                                                                | -2.353569  | -2.071522 | 0.367204  |
| 6                                                                | -2.079262  | 2.897144  | -0.030160 |
| 6                                                                | -1.026592  | -1.660613 | 0.163180  |
| 6                                                                | -0.957251  | -0.273000 | 0.739419  |
| 6                                                                | 5.044910   | -0.093247 | -0.188260 |
| 8                                                                | -4.286402  | 0.209403  | -0.427568 |
| 6                                                                | 3.261142   | 1.790561  | -0.309455 |
| 12                                                               | -4.346649  | -1.846074 | -0.541205 |

|                                                              |            |           |           |
|--------------------------------------------------------------|------------|-----------|-----------|
| 6                                                            | 4.161368   | 0.885190  | -0.306690 |
| 6                                                            | -2.370272  | -0.621209 | 0.619320  |
| 8                                                            | 6.321240   | -2.204115 | 0.046923  |
| 16                                                           |            |           |           |
| 199.725064 Kcal/mol 8.660909 eV -101.065398 H Child_4_9.log  |            |           |           |
| 6                                                            | -2.713160  | 0.092402  | 0.145051  |
| 12                                                           | 3.661796   | 2.555894  | -0.082718 |
| 6                                                            | -7.254539  | 2.308070  | -0.701760 |
| 8                                                            | 5.776586   | -1.067422 | -1.072131 |
| 8                                                            | -1.827263  | -5.354331 | 0.447334  |
| 6                                                            | 4.844942   | -0.444040 | -0.663829 |
| 6                                                            | -3.907908  | 0.391802  | -0.145734 |
| 6                                                            | 3.920794   | 0.363197  | -0.237097 |
| 6                                                            | -6.192080  | 1.538499  | -0.611933 |
| 6                                                            | 2.604990   | 0.244708  | 0.222129  |
| 12                                                           | -0.725046  | 0.043028  | 0.656571  |
| 6                                                            | 1.846405   | 1.476993  | 0.809257  |
| 6                                                            | 1.407103   | -0.350999 | 0.260679  |
| 6                                                            | -5.074606  | 0.935654  | -0.427961 |
| 6                                                            | 0.684619   | 1.512003  | 1.375248  |
| 6                                                            | -1.305825  | -4.703792 | -0.338694 |
| 16                                                           |            |           |           |
| 199.821963 Kcal/mol 8.665111 eV -101.065244 H MutI_6_75.log  |            |           |           |
| 6                                                            | 1.732127   | -0.839674 | 0.246515  |
| 6                                                            | 3.526181   | 1.958638  | 0.083724  |
| 8                                                            | -2.127037  | -0.544222 | 0.607589  |
| 6                                                            | 0.776647   | 0.251741  | 0.146349  |
| 12                                                           | -3.259345  | 0.848173  | 0.047669  |
| 6                                                            | 0.385462   | -1.092416 | 0.191079  |
| 6                                                            | -2.767613  | 2.905952  | -0.341144 |
| 8                                                            | -1.899645  | -1.865021 | 0.032907  |
| 6                                                            | -0.181923  | 2.529955  | -0.224028 |
| 6                                                            | 0.190747   | -4.624160 | -0.472667 |
| 12                                                           | 3.682832   | -0.084836 | -0.000837 |
| 6                                                            | -1.500318  | 2.553579  | -0.262059 |
| 6                                                            | 0.864703   | 1.644525  | -0.040133 |
| 6                                                            | 2.277809   | 1.980109  | -0.036238 |
| 6                                                            | -0.202368  | -3.424281 | -0.252801 |
| 6                                                            | -0.579518  | -2.158317 | 0.013746  |
| 16                                                           |            |           |           |
| 199.885747 Kcal/mol 8.667877 eV -101.065142 H MutD_17_38.log |            |           |           |
| 12                                                           | 5.927881   | -0.059476 | 0.242226  |
| 6                                                            | 1.332152   | -0.925571 | -0.010607 |
| 6                                                            | -7.035918  | 0.358525  | 0.588714  |
| 12                                                           | 8.686108   | 0.607221  | -0.091015 |
| 6                                                            | -9.476795  | 0.655674  | -0.092357 |
| 6                                                            | -1.160826  | -1.389803 | -0.315439 |
| 8                                                            | -2.315118  | -1.618137 | -0.438363 |
| 6                                                            | -10.716948 | 0.826245  | -0.423875 |
| 6                                                            | 10.611869  | 1.091712  | -0.147077 |
| 6                                                            | -11.954662 | 0.956642  | -0.770686 |
| 6                                                            | 0.100180   | -1.145423 | -0.179952 |
| 6                                                            | -8.260554  | 0.514473  | 0.238192  |
| 6                                                            | 3.839950   | -0.509864 | 0.412879  |
| 6                                                            | 11.845098  | 1.027238  | -0.410179 |

|                                                              |           |           |           |
|--------------------------------------------------------------|-----------|-----------|-----------|
| 8                                                            | -5.909618 | 0.227140  | 0.906773  |
| 6                                                            | 2.614789  | -0.700674 | 0.183417  |
| 16                                                           |           |           |           |
| 200.803854 Kcal/mol 8.707690 eV -101.063679 H MutI_17_35.log |           |           |           |
| 6                                                            | 4.574452  | 0.242524  | -0.372841 |
| 6                                                            | 1.009851  | 1.588404  | -0.223369 |
| 12                                                           | -3.193259 | -0.563530 | -1.630741 |
| 6                                                            | 3.418066  | 0.790072  | -0.444964 |
| 6                                                            | -0.193918 | 1.903013  | 0.048787  |
| 6                                                            | 2.229176  | 1.249552  | -0.445989 |
| 8                                                            | -2.472748 | 2.511120  | 0.766889  |
| 6                                                            | -1.384319 | 2.194244  | 0.434337  |
| 6                                                            | 6.813596  | -0.990136 | -0.111522 |
| 6                                                            | -5.389598 | -1.321973 | -1.653319 |
| 8                                                            | -0.805825 | -1.431592 | 1.926287  |
| 12                                                           | -4.758789 | -0.918210 | 0.543300  |
| 6                                                            | -2.685223 | -0.908049 | 0.350004  |
| 6                                                            | 7.900297  | -1.677446 | 0.049873  |
| 6                                                            | -1.709620 | -1.195162 | 1.164350  |
| 6                                                            | 5.692768  | -0.350936 | -0.211367 |
| 16                                                           |           |           |           |
| 201.158122 Kcal/mol 8.723053 eV -101.063114 H Child_2_31.log |           |           |           |
| 6                                                            | -0.071853 | -2.439425 | 0.119368  |
| 8                                                            | -2.861007 | 3.452685  | 0.567919  |
| 6                                                            | 0.507332  | -2.750270 | 1.542095  |
| 6                                                            | -2.865584 | 2.330419  | 0.236693  |
| 6                                                            | 1.056050  | -1.621871 | -0.051177 |
| 6                                                            | -2.715607 | 1.003020  | -0.097351 |
| 6                                                            | 2.074472  | 0.418772  | -1.234346 |
| 6                                                            | -3.644572 | 0.019363  | -0.572160 |
| 6                                                            | 0.817162  | -1.348298 | 1.384359  |
| 6                                                            | -1.384704 | 0.716038  | 0.140829  |
| 6                                                            | 1.745595  | -0.745690 | -0.872106 |
| 12                                                           | 0.642417  | 0.758204  | 0.595748  |
| 6                                                            | 6.667968  | 1.128461  | -0.819972 |
| 6                                                            | -4.007066 | -1.115129 | -0.959032 |
| 8                                                            | 6.165062  | 1.094142  | 0.212913  |
| 12                                                           | -1.934717 | -1.587117 | -0.524903 |
| 16                                                           |           |           |           |
| 201.359034 Kcal/mol 8.731765 eV -101.062794 H Child_2_56.log |           |           |           |
| 6                                                            | 7.651983  | -0.707096 | 0.226455  |
| 6                                                            | -3.430791 | -2.194664 | 0.294039  |
| 8                                                            | 1.921224  | 2.221585  | -0.984425 |
| 12                                                           | -4.090883 | -0.282289 | 0.776221  |
| 8                                                            | 6.738789  | -0.751053 | 0.854718  |
| 6                                                            | -2.351431 | -1.968991 | -0.299806 |
| 6                                                            | 1.024692  | 1.618794  | -0.394265 |
| 6                                                            | -1.250015 | -1.224740 | -0.802895 |
| 6                                                            | -2.398368 | 0.891483  | -0.574823 |
| 6                                                            | 0.165156  | -1.288082 | -0.349675 |
| 6                                                            | -1.559991 | 0.055034  | -1.167923 |
| 6                                                            | -2.910998 | 1.488702  | 0.481246  |
| 6                                                            | 1.145025  | 0.101277  | -0.270080 |
| 6                                                            | 0.581833  | -0.612195 | 0.872806  |
| 6                                                            | 1.457524  | -1.071457 | -1.055873 |

|                                                                  |           |           |           |
|------------------------------------------------------------------|-----------|-----------|-----------|
| 12                                                               | -0.744769 | 1.757902  | 0.830647  |
| 16                                                               |           |           |           |
| 202.520350 Kcal/mol 8.782125 eV -101.060944 H Child_6_22.log     |           |           |           |
| 6                                                                | 4.263805  | -0.504380 | -0.294250 |
| 6                                                                | -4.369598 | -1.650946 | 0.129331  |
| 6                                                                | 4.069026  | 0.710277  | -0.052867 |
| 8                                                                | -3.906958 | 0.861474  | -0.240063 |
| 6                                                                | 3.368577  | 1.830889  | 0.140780  |
| 6                                                                | -3.972756 | -0.412043 | -0.029302 |
| 6                                                                | 3.531163  | -1.595735 | -0.393486 |
| 12                                                               | -2.432267 | 1.915140  | -0.302004 |
| 6                                                                | 2.160776  | 1.774433  | 0.252794  |
| 6                                                                | -2.833220 | -1.479463 | 0.199195  |
| 6                                                                | 2.535785  | -2.406455 | -0.410869 |
| 6                                                                | -1.582433 | -1.590351 | 0.270291  |
| 6                                                                | 0.880454  | 1.413169  | 0.248819  |
| 6                                                                | -0.373577 | 1.997605  | -0.227948 |
| 12                                                               | 0.412115  | -1.536949 | -0.007089 |
| 8                                                                | 1.178684  | 0.005991  | 0.829337  |
| 16                                                               |           |           |           |
| 203.344829 Kcal/mol 8.817877 eV -101.059630 H Original3D_2_5.log |           |           |           |
| 6                                                                | -1.809398 | -1.110795 | -0.281237 |
| 8                                                                | -5.465642 | 0.736451  | -0.379148 |
| 6                                                                | -4.864771 | 1.061246  | 0.552542  |
| 6                                                                | -1.399182 | 0.235188  | 0.091641  |
| 8                                                                | -3.176235 | -1.840447 | -0.040431 |
| 6                                                                | -1.035356 | 1.533215  | -0.150730 |
| 12                                                               | 1.972312  | 2.149540  | 0.042716  |
| 6                                                                | 2.017616  | -1.105310 | 0.820382  |
| 6                                                                | -2.551401 | -1.976301 | -1.245915 |
| 12                                                               | 4.246896  | 0.462246  | -0.831018 |
| 6                                                                | -0.174037 | 2.408426  | -0.251238 |
| 6                                                                | 1.584592  | 0.231618  | 1.151539  |
| 6                                                                | 0.657668  | -0.813197 | 0.952077  |
| 6                                                                | -0.704912 | -0.814999 | 0.609279  |
| 6                                                                | 4.193585  | -1.742475 | -0.426010 |
| 6                                                                | 3.169682  | -1.658193 | 0.313712  |
| 16                                                               |           |           |           |
| 203.387923 Kcal/mol 8.819746 eV -101.059561 H MutD_6_72.log      |           |           |           |
| 12                                                               | -3.755164 | 0.618973  | 0.272403  |
| 6                                                                | 2.743304  | 0.049337  | 0.056232  |
| 6                                                                | -3.568875 | -2.000608 | -0.141679 |
| 6                                                                | 5.990783  | -1.448731 | 0.477940  |
| 8                                                                | 1.382168  | 1.961442  | -0.141210 |
| 6                                                                | -2.329560 | -2.590442 | -0.079130 |
| 8                                                                | 3.732805  | -0.513684 | -0.481106 |
| 6                                                                | 4.859899  | -1.009721 | 0.067921  |
| 6                                                                | -4.494057 | -1.149080 | -0.325506 |
| 6                                                                | 1.535716  | 0.610031  | -0.069153 |
| 6                                                                | -1.871295 | 1.494396  | 0.306719  |
| 6                                                                | 0.267128  | -0.128916 | 0.065234  |
| 6                                                                | -0.005742 | -1.468833 | 0.006392  |
| 6                                                                | -1.157147 | -2.127022 | 0.019298  |
| 6                                                                | -0.854151 | 0.729522  | 0.211850  |
| 12                                                               | -0.212819 | 2.935889  | -0.155584 |

16

204.183703 Kcal/mol 8.854255 eV -101.058293 H Child\_3\_57.log

|    |           |           |           |
|----|-----------|-----------|-----------|
| 6  | 4.140878  | -1.627359 | 0.067316  |
| 12 | -8.054423 | -2.954199 | -0.921940 |
| 6  | 4.683624  | -2.774585 | 0.159408  |
| 6  | 0.422712  | 3.430612  | -0.608599 |
| 6  | 3.168973  | -0.728592 | -0.002065 |
| 6  | -2.413880 | 1.310263  | 0.633014  |
| 6  | 1.766309  | -0.369205 | 0.089870  |
| 6  | -3.538642 | 0.960632  | 1.134385  |
| 6  | 0.529749  | -0.059673 | 0.685102  |
| 6  | -4.635478 | 0.502448  | 1.685533  |
| 6  | 2.718639  | 0.559699  | -0.399475 |
| 6  | -1.221278 | 1.538731  | 0.117273  |
| 8  | 5.262842  | -3.828653 | 0.202527  |
| 6  | -0.508312 | 2.690850  | -0.244199 |
| 8  | -0.364333 | 0.370777  | -0.230213 |
| 12 | 2.232104  | 2.542539  | -0.718384 |

16

204.202345 Kcal/mol 8.855063 eV -101.058263 H Original3D\_0\_53.log

|    |           |           |           |
|----|-----------|-----------|-----------|
| 6  | -1.930028 | 0.585617  | -0.207782 |
| 6  | -0.314957 | -0.795293 | -1.019211 |
| 8  | 0.786896  | -1.143495 | -1.625225 |
| 6  | -2.311562 | -0.729688 | 0.260422  |
| 6  | -1.304962 | -2.979226 | -0.103477 |
| 6  | 3.689048  | 1.925338  | 0.507100  |
| 8  | 3.822346  | -2.245608 | 1.353958  |
| 12 | -4.056052 | -0.031814 | 1.187411  |
| 12 | 1.227728  | 0.903990  | -1.558164 |
| 6  | -0.747116 | 0.575619  | -0.994658 |
| 6  | -1.295768 | -1.654491 | -0.256460 |
| 6  | -2.849141 | 1.605774  | 0.205608  |
| 6  | 2.817109  | 1.654478  | -0.400790 |
| 6  | -3.897542 | 2.064299  | 0.722408  |
| 6  | 4.570933  | 2.022229  | 1.493477  |
| 6  | 3.084978  | -1.500204 | 0.896558  |

16

204.237734 Kcal/mol 8.856598 eV -101.058207 H MutD\_11\_66.log

|    |           |           |           |
|----|-----------|-----------|-----------|
| 6  | -3.404607 | -1.380098 | 0.105447  |
| 6  | -2.957602 | -0.224935 | 0.100422  |
| 6  | 5.829157  | 0.472504  | 0.808919  |
| 6  | -2.169394 | 0.965057  | 0.071038  |
| 8  | -0.817225 | 0.792560  | 0.170648  |
| 6  | -2.719179 | 2.169467  | -0.089152 |
| 6  | 7.469582  | -0.011520 | -1.158230 |
| 6  | -0.686113 | -3.838473 | -0.257906 |
| 6  | -0.069854 | -2.748117 | -0.103915 |
| 6  | 1.806215  | 0.922264  | 0.414707  |
| 12 | -2.606024 | -3.234306 | -0.087003 |
| 6  | 6.652613  | 0.249929  | -0.174119 |
| 12 | 0.227045  | -0.755212 | 0.216436  |
| 6  | -3.268297 | 3.316627  | -0.290307 |
| 6  | -3.804247 | 4.483551  | -0.519034 |
| 8  | 2.376987  | 1.909525  | 0.454301  |

16



204.357522 Kcal/mol 8.861792 eV -101.058016 H Child\_9\_49.log

|    |           |           |           |
|----|-----------|-----------|-----------|
| 6  | -5.450064 | -0.813088 | 0.557170  |
| 6  | 7.889877  | -0.964171 | 0.404272  |
| 6  | -4.333701 | 0.027800  | 0.279360  |
| 6  | 6.668074  | -0.592784 | 0.239149  |
| 8  | -3.652027 | 1.230955  | 0.205371  |
| 6  | 5.406843  | -0.232263 | 0.086348  |
| 6  | -4.070898 | -1.278624 | 0.161754  |
| 6  | 4.206786  | 0.096133  | -0.044617 |
| 6  | -2.330141 | 1.136478  | -0.050512 |
| 6  | 2.908068  | 0.375167  | -0.148982 |
| 6  | -1.858518 | -2.577179 | -0.379530 |
| 6  | 1.709442  | 0.643669  | -0.243363 |
| 6  | -2.983637 | -2.092513 | -0.108539 |
| 8  | 0.400098  | 0.807552  | -0.249327 |
| 12 | -1.009846 | -0.621689 | -0.309317 |
| 12 | -0.703267 | 2.398372  | -0.037634 |

16

204.475422 Kcal/mol 8.866905 eV -101.057828 H MutD\_18\_36.log

|    |           |           |           |
|----|-----------|-----------|-----------|
| 6  | -5.103198 | -0.198066 | 0.801610  |
| 8  | -1.934247 | -1.754572 | -0.184170 |
| 12 | 1.769727  | 1.959026  | 0.184997  |
| 6  | -5.197344 | -0.035480 | -0.461688 |
| 6  | 0.509854  | -2.141627 | -0.325286 |
| 6  | 3.005181  | -1.560858 | -0.087575 |
| 8  | 3.350673  | 0.920223  | 0.402432  |
| 6  | -1.306137 | 1.137639  | 0.286642  |
| 6  | -0.744466 | -1.975073 | -0.262013 |
| 6  | 4.464553  | -1.435346 | 0.081931  |
| 6  | 3.684426  | -0.290453 | 0.221316  |
| 12 | -3.062940 | -0.089632 | 0.181898  |
| 6  | -0.184058 | 1.268664  | 0.955331  |
| 6  | 0.334010  | 2.633611  | -1.273208 |
| 6  | -0.559262 | 1.967822  | -0.693409 |
| 6  | 1.794299  | -1.997155 | -0.268457 |

16

204.830424 Kcal/mol 8.882299 eV -101.057262 H Child\_1\_60.log

|    |           |           |           |
|----|-----------|-----------|-----------|
| 6  | 1.642187  | 2.405936  | 0.039720  |
| 6  | -4.710647 | 0.249106  | -0.356633 |
| 6  | 2.813315  | 1.929735  | 0.177063  |
| 6  | -5.620516 | 0.009545  | -1.227465 |
| 6  | 3.967886  | 1.253447  | 0.211947  |
| 6  | -3.505725 | 0.366529  | 0.220211  |
| 12 | -0.242633 | 1.526922  | -0.272766 |
| 6  | -0.482331 | -1.414840 | 0.403361  |
| 6  | 4.138540  | -0.046071 | -0.035738 |
| 6  | -2.210222 | 1.079304  | 0.271474  |
| 6  | 4.206866  | -1.270643 | -0.443032 |
| 6  | 0.065544  | -2.439877 | -0.237912 |
| 6  | -2.367695 | -0.134629 | 0.855783  |
| 8  | -1.528508 | -1.180154 | 1.266454  |
| 12 | 2.092656  | -1.501875 | -0.448472 |
| 8  | 0.300572  | -0.348074 | -0.093682 |

16

204.928454 Kcal/mol 8.886550 eV -101.057106 H MutI\_14\_69.log

|                                                               |           |           |           |
|---------------------------------------------------------------|-----------|-----------|-----------|
| 6                                                             | -3.352757 | -0.270196 | 0.267663  |
| 12                                                            | -1.627793 | 2.404072  | 0.635508  |
| 6                                                             | 0.614949  | -2.370480 | -0.306890 |
| 6                                                             | 3.097327  | 1.008979  | -0.223281 |
| 12                                                            | -0.900716 | -0.919899 | -0.432807 |
| 6                                                             | -2.723108 | 0.785023  | 0.462422  |
| 6                                                             | 0.555465  | 1.248010  | -0.275473 |
| 6                                                             | -0.004075 | 3.170665  | -0.315083 |
| 6                                                             | 1.257308  | 2.950827  | -0.451343 |
| 6                                                             | 2.914709  | -2.211393 | 0.541288  |
| 8                                                             | -2.452723 | -2.167191 | -0.459290 |
| 6                                                             | 3.784339  | -1.330528 | 0.516102  |
| 6                                                             | 1.666444  | -2.677200 | 0.288271  |
| 6                                                             | 1.862205  | 1.616372  | -0.385625 |
| 6                                                             | 3.670623  | -0.044603 | 0.078693  |
| 8                                                             | -3.762087 | -1.465675 | 0.007680  |
| 16                                                            |           |           |           |
| 204.959935 Kcal/mol 8.887915 eV -101.057056 H MutI_16_55.log  |           |           |           |
| 6                                                             | -5.542031 | 3.827036  | 0.243608  |
| 6                                                             | 4.573134  | 0.812894  | -0.126936 |
| 8                                                             | -2.544221 | 1.589496  | 0.223972  |
| 6                                                             | -3.406061 | 2.394804  | 0.221078  |
| 6                                                             | -3.889424 | -4.711606 | -0.221011 |
| 6                                                             | 0.644356  | -0.077532 | -0.149581 |
| 6                                                             | -0.182118 | -1.076428 | -0.247541 |
| 6                                                             | -1.987813 | -2.928127 | -0.142055 |
| 6                                                             | -2.940215 | -3.838273 | -0.191944 |
| 6                                                             | 5.399998  | 0.319739  | 0.986577  |
| 6                                                             | -1.114898 | -2.006015 | -0.094509 |
| 12                                                            | 3.148014  | 1.026282  | -1.564283 |
| 12                                                            | 2.032880  | -0.554937 | 1.326489  |
| 6                                                             | 3.974298  | 0.031756  | 0.888818  |
| 6                                                             | -4.405533 | 3.225490  | 0.223838  |
| 8                                                             | 1.430110  | 0.723185  | -0.910037 |
| 16                                                            |           |           |           |
| 204.974227 Kcal/mol 8.888535 eV -101.057033 H Child_2_42.log  |           |           |           |
| 6                                                             | 0.601903  | -2.167363 | 0.267148  |
| 12                                                            | -4.946897 | 1.810165  | 0.430951  |
| 6                                                             | -0.580646 | -2.211889 | -0.072127 |
| 6                                                             | 5.138399  | 0.548693  | -0.140483 |
| 8                                                             | -3.632389 | 0.462838  | 0.632493  |
| 6                                                             | 4.421710  | 1.790720  | 0.643983  |
| 6                                                             | -2.903171 | -1.496128 | -0.418389 |
| 6                                                             | -1.531400 | 0.577102  | -0.460116 |
| 12                                                            | 2.500478  | -1.574804 | 0.551855  |
| 6                                                             | -0.442990 | 1.077777  | -0.718488 |
| 8                                                             | -1.839456 | -2.372176 | -0.505136 |
| 6                                                             | 0.847408  | 1.449967  | -0.779191 |
| 6                                                             | -2.648671 | -0.156608 | -0.020788 |
| 6                                                             | 3.302837  | 1.246268  | -0.037237 |
| 6                                                             | 2.066301  | 1.512550  | -0.570822 |
| 6                                                             | 3.916952  | -0.096027 | 0.171090  |
| 16                                                            |           |           |           |
| 204.995359 Kcal/mol 8.889451 eV -101.056999 H Child_10_42.log |           |           |           |
| 6                                                             | 3.849984  | 1.410585  | 0.198658  |

|                                                              |           |           |           |
|--------------------------------------------------------------|-----------|-----------|-----------|
| 6                                                            | -2.855111 | -1.248173 | 0.709138  |
| 6                                                            | 2.578578  | 1.951563  | 0.291466  |
| 6                                                            | -4.135896 | -1.218499 | 1.042089  |
| 8                                                            | 4.773648  | -0.953006 | 0.050349  |
| 6                                                            | -1.884060 | -0.845209 | -0.093066 |
| 8                                                            | 3.644824  | 0.093172  | 0.341632  |
| 6                                                            | -4.820644 | -0.298227 | 0.447433  |
| 6                                                            | 1.361747  | 2.179902  | 0.151816  |
| 6                                                            | -2.171763 | 0.704111  | -0.355504 |
| 6                                                            | 0.045937  | 1.991648  | 0.024835  |
| 12                                                           | 0.094472  | -1.571675 | -0.534929 |
| 6                                                            | -1.106544 | 1.556450  | -0.149566 |
| 6                                                            | -4.697253 | 0.530927  | -0.598517 |
| 12                                                           | 2.946458  | -1.707742 | -0.228278 |
| 6                                                            | -3.471464 | 0.990200  | -0.665010 |
| 16                                                           |           |           |           |
| 205.126131 Kcal/mol 8.895122 eV -101.056791 H Child_2_41.log |           |           |           |
| 6                                                            | 1.938902  | -0.566643 | -1.819051 |
| 6                                                            | -3.232943 | -0.301094 | 2.417456  |
| 6                                                            | 2.643193  | -1.482819 | -0.883196 |
| 8                                                            | -4.315390 | 1.024759  | -0.801561 |
| 12                                                           | -0.106181 | 0.173945  | -1.008546 |
| 6                                                            | -3.236153 | 0.862345  | -1.086306 |
| 6                                                            | 2.764287  | -0.095063 | -0.729866 |
| 8                                                            | -2.089163 | 0.679552  | -1.454595 |
| 12                                                           | 1.427841  | -2.501682 | 0.480245  |
| 6                                                            | -2.271240 | -0.810825 | 1.767047  |
| 6                                                            | 2.444209  | 0.917522  | 0.168601  |
| 6                                                            | 2.727510  | 3.244633  | 1.600382  |
| 6                                                            | 1.206549  | 1.384039  | 0.356072  |
| 6                                                            | -1.255685 | -1.291071 | 1.075762  |
| 6                                                            | -0.297724 | -1.649102 | 0.313479  |
| 6                                                            | 2.465176  | 2.171139  | 0.884429  |
| 16                                                           |           |           |           |
| 205.262575 Kcal/mol 8.901039 eV -101.056574 H Child_3_15.log |           |           |           |
| 6                                                            | 1.691196  | 3.611195  | -0.076779 |
| 6                                                            | 0.891792  | -3.141854 | -0.038189 |
| 6                                                            | 0.548856  | 2.705153  | -0.109641 |
| 6                                                            | -0.296570 | -2.758450 | -0.170943 |
| 8                                                            | -0.792364 | 2.619561  | -0.282747 |
| 12                                                           | 2.722925  | -2.307118 | 0.138346  |
| 6                                                            | 1.740952  | 2.128959  | 0.125193  |
| 12                                                           | -1.796225 | -1.383570 | -0.178263 |
| 6                                                            | 2.489055  | -0.184165 | 1.096552  |
| 8                                                            | -6.193350 | -0.743632 | -0.214452 |
| 6                                                            | -2.313807 | 0.610406  | 0.138497  |
| 6                                                            | -6.004401 | 0.153648  | 0.485205  |
| 6                                                            | 3.496650  | 0.239642  | -0.420648 |
| 6                                                            | -1.417917 | 1.411976  | -0.043725 |
| 6                                                            | 4.144772  | -0.842947 | -0.598487 |
| 6                                                            | 2.490309  | 0.946573  | 0.355733  |
| 16                                                           |           |           |           |
| 205.681974 Kcal/mol 8.919226 eV -101.055905 H Child_1_56.log |           |           |           |
| 6                                                            | 1.920913  | -1.042638 | -1.779241 |
| 6                                                            | -1.375711 | 3.322746  | -0.059832 |

|                                                               |           |           |           |
|---------------------------------------------------------------|-----------|-----------|-----------|
| 12                                                            | 0.977780  | -2.444910 | -0.447428 |
| 6                                                             | -1.244384 | 1.877350  | -0.032186 |
| 8                                                             | -5.410734 | -1.052392 | 0.018872  |
| 6                                                             | -0.096819 | 2.676046  | -0.077941 |
| 8                                                             | -0.908994 | -1.865850 | -0.374972 |
| 6                                                             | -1.486092 | 0.542744  | -0.036012 |
| 12                                                            | 2.490025  | -0.270340 | 1.668219  |
| 6                                                             | 1.229469  | 2.264308  | -0.124965 |
| 6                                                             | 2.391610  | -2.369276 | 1.201412  |
| 6                                                             | 2.245188  | 1.592379  | 0.608854  |
| 6                                                             | -4.968381 | -0.353770 | 0.826514  |
| 6                                                             | 2.093744  | 0.182643  | -1.553752 |
| 6                                                             | -1.231506 | -0.663003 | -0.199524 |
| 6                                                             | 2.012663  | 1.291961  | -0.740109 |
| 16                                                            |           |           |           |
| 206.317974 Kcal/mol 8.946805 eV -101.054892 H MutD_18_70.log  |           |           |           |
| 6                                                             | -1.925224 | 2.343422  | -0.035219 |
| 6                                                             | -0.581386 | 2.483759  | 0.012038  |
| 6                                                             | -3.106613 | 1.979878  | -0.081496 |
| 8                                                             | -4.226874 | 0.097995  | -0.213978 |
| 6                                                             | 4.176445  | -1.766534 | -0.604165 |
| 6                                                             | 4.431634  | 0.726203  | 0.205282  |
| 6                                                             | -4.136643 | -1.123561 | -0.493313 |
| 12                                                            | -2.714545 | -2.352972 | 0.513282  |
| 6                                                             | 2.892079  | -1.592331 | -0.438539 |
| 12                                                            | 2.096361  | 0.955607  | 0.032924  |
| 6                                                             | 0.448749  | -1.823837 | 0.001566  |
| 8                                                             | 5.569362  | 0.777860  | 0.328082  |
| 6                                                             | -0.690483 | -2.271017 | 0.243159  |
| 6                                                             | 0.662717  | 2.418364  | 0.059404  |
| 6                                                             | 1.653903  | -1.165005 | -0.138345 |
| 6                                                             | -4.378795 | 1.417582  | 0.025076  |
| 16                                                            |           |           |           |
| 206.355333 Kcal/mol 8.948425 eV -101.054832 H Child_9_59.log  |           |           |           |
| 8                                                             | 1.222648  | 1.742600  | -1.954224 |
| 6                                                             | 0.796459  | -1.820581 | -0.212616 |
| 6                                                             | 0.328985  | 1.242177  | -1.443541 |
| 6                                                             | -0.428563 | -2.051193 | -0.150818 |
| 6                                                             | -7.896816 | 2.496185  | 0.435516  |
| 6                                                             | 2.065889  | -1.382068 | -0.224122 |
| 6                                                             | -6.983008 | 1.531344  | 0.493070  |
| 6                                                             | -1.777010 | -2.065348 | -0.041852 |
| 6                                                             | -6.065449 | 0.639987  | 0.450374  |
| 6                                                             | 3.148207  | -0.817120 | -0.162177 |
| 6                                                             | 3.971586  | 1.381378  | 0.324328  |
| 6                                                             | -3.002611 | -1.894230 | 0.077550  |
| 12                                                            | 6.015807  | 1.295353  | 1.208508  |
| 6                                                             | 4.224357  | 0.055020  | 0.069201  |
| 8                                                             | 5.578281  | -0.304969 | 0.080714  |
| 12                                                            | -4.740774 | -0.911550 | 0.233042  |
| 16                                                            |           |           |           |
| 206.521823 Kcal/mol 8.955645 eV -101.054567 H Child_10_31.log |           |           |           |
| 6                                                             | 1.061488  | -1.733076 | 0.457556  |
| 6                                                             | 0.199098  | 2.027104  | 0.091273  |
| 6                                                             | 2.253771  | -1.768846 | 0.149610  |

|    |           |           |           |
|----|-----------|-----------|-----------|
| 6  | 1.379335  | 2.353930  | -0.131350 |
| 12 | -0.473092 | -0.591574 | 1.093584  |
| 12 | 3.287969  | 1.684884  | -0.497750 |
| 6  | -4.285675 | -2.661753 | -0.897217 |
| 6  | -4.642559 | 1.008148  | -0.373169 |
| 6  | -0.977804 | 1.355484  | 0.466033  |
| 6  | 4.538456  | -2.116882 | -0.617025 |
| 6  | -2.248320 | 1.491193  | 0.106878  |
| 6  | -3.473207 | 0.648044  | 0.405002  |
| 6  | -3.469636 | 1.820890  | -0.582820 |
| 6  | 3.575503  | -1.316163 | -0.123810 |
| 8  | 3.724132  | 0.024876  | 0.096282  |
| 8  | -3.379286 | -2.495896 | -0.203252 |

16

206.705540 Kcal/mol 8.963612 eV -101.054274 H Child\_3\_55.log

|    |           |           |           |
|----|-----------|-----------|-----------|
| 8  | -3.153982 | -2.290264 | 0.008633  |
| 8  | 1.462573  | 4.013981  | 0.047087  |
| 6  | -1.932645 | -2.678869 | 0.011957  |
| 6  | 1.411588  | 2.659091  | 0.015853  |
| 6  | -0.729029 | -2.924509 | 0.018649  |
| 6  | 2.395497  | 1.661953  | 0.005482  |
| 12 | -3.818343 | -0.532060 | 0.000270  |
| 6  | 3.034683  | 0.617439  | -0.002226 |
| 6  | 0.616596  | -2.864005 | 0.014820  |
| 6  | 0.080622  | 2.668072  | -0.001843 |
| 6  | 1.819581  | -2.592665 | 0.009669  |
| 6  | 3.517285  | -0.672575 | -0.012314 |
| 6  | -3.924064 | 1.611168  | -0.004188 |
| 6  | 4.479849  | -1.752784 | -0.040194 |
| 6  | 3.025716  | -1.950792 | -0.008397 |
| 12 | -1.951890 | 2.492154  | -0.041051 |

16

206.992995 Kcal/mol 8.976077 eV -101.053816 H Original3D\_17\_4.log

|    |           |           |           |
|----|-----------|-----------|-----------|
| 8  | -0.369378 | -0.758792 | -1.149581 |
| 6  | 0.765567  | -0.966390 | -1.760075 |
| 6  | 0.793887  | -0.245493 | 1.853304  |
| 6  | 2.412301  | -2.245783 | 1.395611  |
| 6  | 1.783237  | -1.256221 | 1.667513  |
| 6  | -4.304080 | 3.165990  | 0.233568  |
| 6  | -4.559816 | 1.942962  | -0.331978 |
| 12 | -1.240118 | -0.886858 | 0.551031  |
| 12 | 2.773579  | -1.774244 | -0.525432 |
| 6  | -4.485483 | 0.780648  | -0.438547 |
| 6  | 4.759919  | 2.736994  | -0.172659 |
| 8  | 4.603723  | 3.885126  | -0.153097 |
| 6  | 1.880678  | -1.091363 | -2.343264 |
| 6  | -3.350034 | -1.486774 | 0.004902  |
| 6  | -4.079402 | -0.529376 | -0.394730 |
| 6  | -0.329489 | 0.348564  | 1.972060  |

16

207.209279 Kcal/mol 8.985456 eV -101.053471 H Original3D\_7\_6.log

|   |           |           |           |
|---|-----------|-----------|-----------|
| 6 | -2.014539 | 0.308811  | -0.052825 |
| 6 | -2.786512 | -0.136694 | 1.147627  |
| 6 | 3.346996  | -0.843759 | 1.078361  |
| 6 | 0.976586  | -0.013975 | 0.425757  |

|                                                               |            |           |           |
|---------------------------------------------------------------|------------|-----------|-----------|
| 6                                                             | 1.208496   | -2.008254 | -0.252564 |
| 6                                                             | 0.126274   | -0.992914 | -0.160495 |
| 12                                                            | 0.779233   | 2.156434  | 0.054295  |
| 6                                                             | -2.405962  | -0.802214 | -1.251799 |
| 6                                                             | 2.147255   | -0.980135 | 0.487751  |
| 12                                                            | 3.611874   | 1.393528  | -0.358394 |
| 6                                                             | -3.492230  | -0.177833 | -1.694352 |
| 6                                                             | -1.229345  | 2.826871  | -0.231971 |
| 6                                                             | -1.203008  | -0.798122 | -0.521398 |
| 8                                                             | 1.413671   | -3.079810 | -0.768625 |
| 8                                                             | -2.753831  | -0.774928 | 2.147268  |
| 6                                                             | -1.669344  | 1.657944  | -0.204086 |
| 16                                                            |            |           |           |
| 207.593612 Kcal/mol 9.002122 eV -101.052859 H MutI_18_53.log  |            |           |           |
| 6                                                             | 2.628520   | 0.070484  | -0.133593 |
| 8                                                             | -3.708732  | -1.036647 | 2.545722  |
| 6                                                             | -0.876981  | -1.373183 | 0.601202  |
| 12                                                            | 0.556786   | -2.469077 | -1.621676 |
| 6                                                             | 2.420473   | -1.659337 | -2.044643 |
| 12                                                            | -3.904896  | 0.965539  | -0.171370 |
| 6                                                             | -0.314692  | -0.325148 | 1.288448  |
| 6                                                             | 1.933487   | 0.545245  | 0.778782  |
| 6                                                             | 2.744511   | -0.824345 | -1.161973 |
| 6                                                             | -4.006552  | 3.486031  | -2.188011 |
| 6                                                             | -3.729840  | -0.555122 | 1.502924  |
| 6                                                             | 0.706879   | 0.377868  | 1.351131  |
| 6                                                             | -0.948403  | -2.294188 | -0.243215 |
| 6                                                             | -4.052649  | 2.539095  | -1.324575 |
| 8                                                             | 6.342356   | 1.697398  | 1.187655  |
| 6                                                             | 6.679968   | 2.138675  | 0.181781  |
| 16                                                            |            |           |           |
| 207.673996 Kcal/mol 9.005608 eV -101.052731 H Child_14_18.log |            |           |           |
| 6                                                             | 5.079487   | 0.645606  | 0.206620  |
| 6                                                             | -5.952869  | 0.190024  | 0.629602  |
| 6                                                             | 3.901271   | -0.207170 | 0.227996  |
| 8                                                             | -4.833527  | 0.115328  | 0.345719  |
| 6                                                             | 3.725488   | 1.154363  | 0.120579  |
| 8                                                             | -2.296243  | 1.595603  | -0.265503 |
| 6                                                             | 3.008996   | -1.261879 | 0.181888  |
| 12                                                            | -2.784113  | -0.244878 | -0.183056 |
| 6                                                             | 2.620379   | 1.959600  | 0.000189  |
| 6                                                             | -1.101630  | 2.045692  | -0.233105 |
| 6                                                             | 0.087496   | 2.357474  | -0.184225 |
| 6                                                             | 1.954686   | -1.913637 | 0.826603  |
| 6                                                             | -2.004645  | -2.214467 | -0.453870 |
| 6                                                             | 2.115795   | -1.937724 | -0.653484 |
| 6                                                             | 1.429002   | 2.274729  | -0.100178 |
| 12                                                            | 0.105565   | -2.442050 | -0.154727 |
| 16                                                            |            |           |           |
| 207.743323 Kcal/mol 9.008614 eV -101.052620 H Child_4_18.log  |            |           |           |
| 6                                                             | 0.293005   | 1.287585  | -0.077368 |
| 6                                                             | -2.080686  | 1.403880  | 0.312753  |
| 12                                                            | -0.505794  | 3.016563  | 0.841686  |
| 6                                                             | -1.045296  | 0.597308  | -0.302538 |
| 6                                                             | -10.287099 | -2.000507 | 0.248044  |

|                                                               |           |           |           |
|---------------------------------------------------------------|-----------|-----------|-----------|
| 6                                                             | 4.698317  | -1.248818 | -0.331064 |
| 8                                                             | -9.902678 | -1.469101 | -0.694700 |
| 8                                                             | -1.136775 | -0.489973 | -0.888480 |
| 6                                                             | 1.435364  | 0.685238  | -0.277318 |
| 12                                                            | 4.230493  | -0.044850 | -1.930965 |
| 6                                                             | -2.531182 | 2.487837  | 0.768698  |
| 6                                                             | 3.297736  | -1.735100 | 1.252717  |
| 6                                                             | 2.561703  | -2.299570 | 2.167733  |
| 6                                                             | 4.978599  | -1.729205 | 0.983753  |
| 6                                                             | 2.571731  | 0.103164  | -0.541288 |
| 6                                                             | 3.377679  | -0.883138 | 0.085342  |
| 16                                                            |           |           |           |
| 208.034187 Kcal/mol 9.021228 eV -101.052157 H Child_14_27.log |           |           |           |
| 12                                                            | -3.833274 | -2.386720 | 0.596889  |
| 6                                                             | 7.476930  | -0.444028 | 2.325029  |
| 6                                                             | -5.176566 | -0.885575 | 0.927712  |
| 6                                                             | 6.641197  | 0.082852  | 1.497028  |
| 6                                                             | -1.992730 | -2.834503 | -0.073604 |
| 6                                                             | 5.776063  | 0.611072  | 0.638902  |
| 6                                                             | -0.966920 | -2.516291 | -0.713836 |
| 6                                                             | 4.952151  | 1.089435  | -0.154912 |
| 6                                                             | -5.226864 | 0.372244  | 0.804246  |
| 8                                                             | 4.030960  | 1.502878  | -0.993641 |
| 6                                                             | -5.123349 | 1.677483  | 0.643230  |
| 6                                                             | 3.013940  | 0.683755  | -1.319547 |
| 6                                                             | -4.653468 | 2.782912  | 0.213631  |
| 6                                                             | 2.061740  | -0.048689 | -1.576857 |
| 12                                                            | 0.601699  | -1.465165 | -1.416072 |
| 8                                                             | -4.270188 | 3.846950  | -0.185851 |
| 16                                                            |           |           |           |
| 208.051257 Kcal/mol 9.021968 eV -101.052130 H Child_18_11.log |           |           |           |
| 6                                                             | 6.704666  | -1.332108 | 0.065654  |
| 12                                                            | -4.068940 | -0.757764 | -0.384576 |
| 6                                                             | 5.448015  | -1.062562 | -0.070765 |
| 6                                                             | -2.938481 | 0.913735  | -0.465569 |
| 6                                                             | 4.226756  | -0.620866 | -0.291667 |
| 6                                                             | -3.897071 | -2.916578 | 0.005607  |
| 6                                                             | 2.974716  | -0.384768 | -0.425485 |
| 6                                                             | -1.902395 | 1.503217  | -0.142315 |
| 8                                                             | 1.791738  | -0.031841 | -0.543859 |
| 6                                                             | -0.165537 | 4.499397  | -0.304921 |
| 12                                                            | 0.120717  | -0.627129 | 0.372330  |
| 6                                                             | -2.607531 | -2.579978 | 0.173167  |
| 6                                                             | -0.285002 | 3.308811  | 0.104561  |
| 6                                                             | -1.430318 | -2.065932 | 0.326212  |
| 6                                                             | -0.636596 | 2.017985  | 0.335308  |
| 8                                                             | 0.012180  | 1.148917  | 1.079889  |
| 16                                                            |           |           |           |
| 209.114528 Kcal/mol 9.068076 eV -101.050435 H Child_11_50.log |           |           |           |
| 8                                                             | -5.053571 | 0.948040  | 0.490559  |
| 6                                                             | 5.170559  | -3.643064 | -0.070679 |
| 6                                                             | -3.763930 | 0.854877  | 0.120841  |
| 6                                                             | 4.084339  | -2.746898 | 0.170612  |
| 6                                                             | -2.849757 | 1.772675  | -0.210475 |
| 6                                                             | 5.259275  | -2.787220 | 0.995778  |

|                                                                  |           |           |           |
|------------------------------------------------------------------|-----------|-----------|-----------|
| 12                                                               | -5.270057 | -0.963834 | 0.726182  |
| 6                                                                | 2.870217  | -2.233362 | -0.129140 |
| 6                                                                | -1.636967 | 1.926406  | -0.680064 |
| 6                                                                | 5.747126  | 4.774042  | -0.071940 |
| 6                                                                | -3.173063 | -0.528169 | 0.062283  |
| 6                                                                | 1.762741  | -1.752656 | -0.417294 |
| 6                                                                | -0.584142 | 1.289624  | -1.018418 |
| 8                                                                | 4.908556  | 4.765830  | 0.716342  |
| 6                                                                | -2.067983 | -1.088331 | -0.241885 |
| 12                                                               | -0.042474 | -0.764374 | -0.785592 |
| 16                                                               |           |           |           |
| 209.456528 Kcal/mol 9.082906 eV -101.049890 H Original3D_5_5.log |           |           |           |
| 6                                                                | 2.371509  | -0.076360 | 1.073230  |
| 6                                                                | 0.285343  | -1.695871 | -1.101340 |
| 8                                                                | 3.678361  | -1.331841 | -0.583660 |
| 6                                                                | 2.611182  | -0.897400 | -0.129500 |
| 12                                                               | -3.370264 | -0.027217 | -0.232745 |
| 6                                                                | 1.354365  | -1.227380 | -0.747750 |
| 8                                                                | -0.943940 | -1.996714 | -1.465837 |
| 12                                                               | -0.395692 | -0.679850 | 1.876708  |
| 6                                                                | -2.450765 | 1.787976  | -0.009021 |
| 6                                                                | -1.338277 | 2.380156  | -0.176620 |
| 6                                                                | 1.516959  | 0.145100  | 1.958915  |
| 6                                                                | 2.389606  | 2.694057  | -0.867682 |
| 6                                                                | -1.944611 | -1.401969 | 0.793753  |
| 6                                                                | 1.155333  | 2.941049  | -0.514965 |
| 6                                                                | -0.097820 | 2.738934  | -0.323722 |
| 6                                                                | -1.966806 | -1.536083 | -0.510562 |
| 16                                                               |           |           |           |
| 209.759796 Kcal/mol 9.096057 eV -101.049407 H MutD_16_38.log     |           |           |           |
| 6                                                                | 0.560665  | 2.446343  | -0.353134 |
| 6                                                                | -4.500749 | -0.186170 | 0.138139  |
| 6                                                                | 4.472342  | 1.513915  | 0.927520  |
| 6                                                                | 2.976739  | -0.223328 | -0.262046 |
| 6                                                                | -5.599040 | 0.177715  | -0.414256 |
| 8                                                                | 3.349006  | -2.390614 | -1.086918 |
| 12                                                               | -2.496995 | -0.527940 | 0.719776  |
| 6                                                                | -1.568268 | 1.275846  | 0.364543  |
| 8                                                                | -1.110983 | -1.819063 | 0.686120  |
| 6                                                                | 0.117873  | -1.866416 | 0.385613  |
| 6                                                                | 1.309464  | -1.893945 | 0.070994  |
| 6                                                                | 3.901778  | 0.450077  | 0.433476  |
| 6                                                                | -0.624647 | 2.104303  | 0.018108  |
| 6                                                                | 2.597055  | -1.624082 | -0.443503 |
| 12                                                               | 2.557216  | 1.978964  | -0.400109 |
| 6                                                                | -6.747683 | 0.536599  | -0.970393 |
| 16                                                               |           |           |           |
| 209.829885 Kcal/mol 9.099096 eV -101.049295 H MutD_17_46.log     |           |           |           |
| 6                                                                | -2.943748 | -0.289492 | -0.038888 |
| 8                                                                | -3.553117 | -2.523266 | 0.472099  |
| 6                                                                | -3.563107 | 0.319623  | -1.071921 |
| 6                                                                | -2.656100 | -1.710027 | 0.170423  |
| 6                                                                | -1.265138 | -1.925308 | 0.043040  |
| 8                                                                | 1.205743  | -1.608188 | 0.145854  |
| 6                                                                | 1.422801  | 1.414192  | 1.018151  |



|                                                                   |           |           |           |
|-------------------------------------------------------------------|-----------|-----------|-----------|
| 6                                                                 | 6.954624  | 0.187770  | -1.053258 |
| 6                                                                 | 0.332112  | 2.124265  | 0.949733  |
| 6                                                                 | 5.706540  | 0.026499  | -0.624549 |
| 6                                                                 | 4.513580  | -0.134522 | -0.196141 |
| 6                                                                 | -0.916361 | 2.451598  | 0.858782  |
| 6                                                                 | -0.044107 | -1.774021 | 0.086534  |
| 6                                                                 | -3.940424 | 1.307245  | -1.834484 |
| 12                                                                | 2.496702  | -0.259703 | 0.432314  |
| 12                                                                | -2.732122 | 2.015095  | 0.002006  |
| 16                                                                |           |           |           |
| 210.581548 Kcal/mol 9.131692 eV -101.048097 H Child_7_45.log      |           |           |           |
| 6                                                                 | -3.014320 | 3.181308  | -0.636460 |
| 6                                                                 | -1.000878 | -2.611142 | -0.060632 |
| 6                                                                 | 0.224654  | 2.498435  | 0.500866  |
| 12                                                                | -3.006142 | -2.423036 | 0.266799  |
| 6                                                                 | -2.424408 | 2.111962  | -0.089927 |
| 6                                                                 | 8.131967  | -1.114575 | -0.042892 |
| 6                                                                 | -1.007661 | 2.104397  | 0.201084  |
| 6                                                                 | -0.303495 | -1.571373 | 0.010924  |
| 6                                                                 | -3.138042 | 0.864041  | 0.172679  |
| 8                                                                 | 9.020772  | -0.389234 | -0.117297 |
| 6                                                                 | -0.028169 | 0.975678  | 0.221776  |
| 6                                                                 | -3.115704 | -0.237626 | 1.053759  |
| 6                                                                 | -3.765496 | -0.279033 | -0.240474 |
| 6                                                                 | 0.045698  | -0.271222 | 0.070655  |
| 12                                                                | 4.497081  | 0.695551  | -0.131801 |
| 8                                                                 | -4.210290 | -1.257676 | -0.956217 |
| 16                                                                |           |           |           |
| 210.681558 Kcal/mol 9.136029 eV -101.047938 H MutD_18_32.log      |           |           |           |
| 6                                                                 | -1.195780 | -2.141239 | 0.130186  |
| 6                                                                 | 1.580670  | 1.481729  | 0.290071  |
| 6                                                                 | -3.718899 | -1.761360 | -0.508213 |
| 6                                                                 | -2.381748 | -1.411591 | -0.052011 |
| 6                                                                 | 1.669060  | 0.092077  | 0.317267  |
| 12                                                                | 8.168857  | -0.851977 | -0.320142 |
| 6                                                                 | -4.121553 | -0.221160 | -0.251218 |
| 8                                                                 | 1.092584  | 2.192914  | -0.875809 |
| 8                                                                 | -2.007055 | 1.064321  | 0.016812  |
| 6                                                                 | -0.396828 | -3.344066 | 0.314146  |
| 6                                                                 | 0.154442  | -2.000522 | 0.288402  |
| 12                                                                | -0.645521 | 2.309217  | 0.003845  |
| 6                                                                 | 1.088520  | -0.994743 | 0.323422  |
| 6                                                                 | -5.188975 | 0.536029  | -0.161950 |
| 6                                                                 | 1.363219  | 2.532661  | 1.107442  |
| 6                                                                 | -2.679503 | -0.025273 | -0.019621 |
| 16                                                                |           |           |           |
| 210.742692 Kcal/mol 9.138680 eV -101.047840 H Original3D_0_56.log |           |           |           |
| 6                                                                 | -1.700101 | -0.327184 | 0.828350  |
| 6                                                                 | -1.040132 | 0.165426  | -0.343099 |
| 12                                                                | -0.185625 | 1.534779  | 1.109456  |
| 6                                                                 | -2.359657 | -1.455323 | 0.136213  |
| 8                                                                 | -1.563583 | 0.218117  | 1.995308  |
| 6                                                                 | 2.717157  | 1.111045  | 1.281839  |
| 8                                                                 | -2.244112 | 3.035901  | -2.236752 |
| 6                                                                 | 3.585943  | 0.207338  | 0.740187  |

|                                                                  |           |           |           |
|------------------------------------------------------------------|-----------|-----------|-----------|
| 6                                                                | -1.759109 | 3.160074  | -1.211389 |
| 6                                                                | -1.655304 | -0.943334 | -1.141767 |
| 6                                                                | -3.192639 | -2.450814 | 0.426020  |
| 6                                                                | -3.876827 | -3.485355 | 0.773969  |
| 12                                                               | 5.124208  | -1.696825 | -1.343887 |
| 6                                                                | -1.566247 | -1.230566 | -2.440164 |
| 6                                                                | 4.259573  | -0.628753 | 0.119084  |
| 6                                                                | 1.787102  | 1.862847  | 1.621545  |
| 16                                                               |           |           |           |
| 210.762123 Kcal/mol 9.139522 eV -101.047810 H MutI_15_45.log     |           |           |           |
| 6                                                                | -7.237945 | -0.341224 | 1.516807  |
| 12                                                               | 6.784522  | -0.366850 | 1.627457  |
| 8                                                                | 5.576154  | -0.297769 | 0.294257  |
| 6                                                                | 1.978455  | 0.161159  | -0.935810 |
| 6                                                                | 0.598942  | 2.300296  | -0.369888 |
| 6                                                                | -2.629439 | -1.310609 | -0.346464 |
| 6                                                                | -4.932484 | -0.344534 | 0.198863  |
| 6                                                                | -3.844063 | -0.981333 | -0.033081 |
| 6                                                                | -0.134949 | -1.336178 | -0.840713 |
| 6                                                                | 1.368942  | 1.316878  | -0.716784 |
| 8                                                                | -5.500485 | 1.007370  | -0.022869 |
| 6                                                                | -1.420248 | -1.545024 | -0.624719 |
| 12                                                               | 4.074617  | -0.107939 | -0.694906 |
| 6                                                                | -0.388715 | 2.994651  | 0.114501  |
| 6                                                                | -6.196590 | -0.040146 | 0.770977  |
| 6                                                                | 1.018923  | -0.870492 | -0.960643 |
| 16                                                               |           |           |           |
| 211.037097 Kcal/mol 9.151446 eV -101.047371 H Original3D_5_6.log |           |           |           |
| 8                                                                | 0.323775  | -0.873454 | 0.024272  |
| 8                                                                | 4.983108  | -1.352887 | 0.517297  |
| 6                                                                | 1.193256  | 1.264698  | -0.413393 |
| 6                                                                | -1.930750 | -1.634149 | 0.138102  |
| 6                                                                | -1.011236 | -0.521953 | 0.456931  |
| 6                                                                | 0.254617  | 1.799740  | -1.366388 |
| 6                                                                | -0.761919 | 2.318360  | -1.935153 |
| 6                                                                | -1.497786 | 0.605694  | 1.054452  |
| 6                                                                | 3.857505  | -0.968254 | 0.392819  |
| 6                                                                | -1.880696 | -2.359085 | -0.955650 |
| 12                                                               | -3.225801 | -0.600328 | 1.438857  |
| 12                                                               | -1.108751 | 2.458412  | 0.345009  |
| 6                                                                | 1.451922  | -0.101957 | 0.005682  |
| 6                                                                | 1.227292  | 2.496905  | 0.113197  |
| 6                                                                | -1.953093 | -3.044134 | -2.071519 |
| 6                                                                | 2.644146  | -0.603579 | 0.291094  |
| 16                                                               |           |           |           |
| 211.310571 Kcal/mol 9.163305 eV -101.046936 H Child_18_14.log    |           |           |           |
| 6                                                                | -3.418102 | 3.029701  | 0.020109  |
| 8                                                                | 8.749938  | 0.952039  | -1.317992 |
| 6                                                                | -2.175704 | 2.658092  | 0.354722  |
| 6                                                                | 9.022488  | 1.707604  | -0.497946 |
| 12                                                               | 0.310427  | 0.818861  | 1.372849  |
| 6                                                                | 1.570229  | -1.643529 | 0.793206  |
| 6                                                                | -1.040746 | 2.327043  | 0.877093  |
| 6                                                                | 0.653137  | -2.569322 | 0.177159  |
| 6                                                                | -0.943809 | -1.040303 | 1.211148  |

|                                                                   |           |           |           |
|-------------------------------------------------------------------|-----------|-----------|-----------|
| 6                                                                 | 0.986139  | -3.717099 | -0.422576 |
| 8                                                                 | -3.746693 | -0.462030 | -1.321268 |
| 6                                                                 | 1.908152  | -0.574406 | 1.346363  |
| 6                                                                 | -2.837749 | -1.230381 | -0.894328 |
| 6                                                                 | -0.703679 | -2.002146 | 0.316435  |
| 6                                                                 | -1.882409 | -1.891717 | -0.466152 |
| 12                                                                | -4.214898 | 1.327698  | -1.020960 |
| 16                                                                |           |           |           |
| 211.420547 Kcal/mol 9.168074 eV -101.046760 H MutD_16_44.log      |           |           |           |
| 12                                                                | 4.861255  | -1.555780 | 0.220601  |
| 8                                                                 | -5.432463 | 0.373598  | -0.028378 |
| 8                                                                 | -1.687978 | 0.553937  | 0.304311  |
| 6                                                                 | 1.867539  | -2.295801 | -0.195576 |
| 6                                                                 | 5.526043  | 0.390740  | 0.406386  |
| 6                                                                 | 3.768476  | 2.259747  | 0.078524  |
| 6                                                                 | 4.714980  | 1.358411  | 0.243625  |
| 6                                                                 | -0.506628 | -1.310411 | -0.418418 |
| 6                                                                 | 1.507855  | 3.419016  | -0.440260 |
| 6                                                                 | 0.591676  | -1.872820 | -0.334389 |
| 6                                                                 | -1.725397 | -0.632971 | -0.344640 |
| 6                                                                 | 3.090129  | -2.482642 | -0.060915 |
| 6                                                                 | -7.847982 | -0.372688 | 0.482680  |
| 6                                                                 | -6.643789 | 0.092224  | 0.263311  |
| 6                                                                 | 2.650974  | 2.848734  | -0.156056 |
| 12                                                                | -3.611233 | 0.236654  | -0.166693 |
| 16                                                                |           |           |           |
| 211.427186 Kcal/mol 9.168362 eV -101.046750 H Original3D_9_5.log  |           |           |           |
| 6                                                                 | 1.515559  | -0.157456 | 0.247813  |
| 12                                                                | -1.113082 | 0.979403  | 0.498391  |
| 8                                                                 | 1.158840  | -2.525384 | -0.418679 |
| 6                                                                 | 3.045187  | -0.077695 | 1.149447  |
| 6                                                                 | 0.786838  | 1.670175  | -1.098616 |
| 6                                                                 | -3.267852 | 0.652138  | 0.307712  |
| 6                                                                 | 1.965726  | -1.617984 | -0.541936 |
| 6                                                                 | -4.368652 | 0.189619  | 0.002098  |
| 6                                                                 | -5.484095 | -0.476802 | -0.179027 |
| 6                                                                 | -0.411084 | 2.031476  | -1.174609 |
| 8                                                                 | -6.433349 | -1.148222 | -0.272268 |
| 6                                                                 | 1.921831  | 1.032456  | -0.525598 |
| 12                                                                | 3.960098  | -0.775127 | -0.692628 |
| 6                                                                 | 1.841592  | -0.019612 | 1.803132  |
| 6                                                                 | 3.270048  | 1.195752  | -0.178634 |
| 6                                                                 | 0.523546  | 0.067523  | 1.497955  |
| 16                                                                |           |           |           |
| 211.812571 Kcal/mol 9.185074 eV -101.046136 H Original3D_17_3.log |           |           |           |
| 12                                                                | -0.439414 | 0.058805  | 1.597385  |
| 12                                                                | 0.510849  | 0.239855  | -1.976694 |
| 8                                                                 | 1.995872  | -1.128660 | 1.737162  |
| 6                                                                 | 1.282790  | -0.130331 | 0.394882  |
| 6                                                                 | 3.253542  | -1.084451 | -0.615028 |
| 6                                                                 | -3.743357 | -1.098807 | 0.280379  |
| 6                                                                 | 2.110324  | -0.351489 | -0.723686 |
| 6                                                                 | -3.243367 | -0.425679 | 1.348525  |
| 8                                                                 | 0.188067  | 4.148584  | -0.156194 |
| 6                                                                 | 0.519050  | 3.097173  | -0.426679 |

|                                                               |           |           |           |
|---------------------------------------------------------------|-----------|-----------|-----------|
| 6                                                             | -3.380213 | -1.288303 | -0.902329 |
| 6                                                             | -2.368646 | 0.140714  | 2.034077  |
| 6                                                             | -2.421385 | -1.056825 | -1.848314 |
| 6                                                             | 2.200029  | 0.086687  | 1.739885  |
| 6                                                             | -1.372867 | -0.485119 | -2.149266 |
| 6                                                             | 4.109313  | -2.027455 | -0.481787 |
| 16                                                            |           |           |           |
| 211.992619 Kcal/mol 9.192882 eV -101.045849 H MutI_12_71.log  |           |           |           |
| 6                                                             | 2.634945  | -2.523361 | 0.772563  |
| 6                                                             | 1.034390  | 0.830848  | -0.946999 |
| 6                                                             | -0.195010 | 0.515250  | -0.715845 |
| 8                                                             | 3.379712  | 1.475931  | -1.329893 |
| 6                                                             | -4.010661 | -1.816561 | -0.110255 |
| 6                                                             | -3.657214 | -0.611757 | -0.140338 |
| 6                                                             | 1.336536  | -2.633730 | 0.530538  |
| 6                                                             | -2.906357 | 1.836560  | 0.049476  |
| 6                                                             | 7.145048  | 0.539731  | 1.274000  |
| 6                                                             | -1.375973 | 0.039725  | -0.472302 |
| 6                                                             | -2.752867 | 0.511132  | -0.195999 |
| 12                                                            | -1.901054 | -2.192913 | -0.224245 |
| 6                                                             | 2.242933  | 1.186021  | -1.159139 |
| 6                                                             | 0.079139  | -2.674557 | 0.286262  |
| 8                                                             | 6.526075  | 1.212276  | 0.572073  |
| 12                                                            | -4.490259 | 2.801124  | 1.143476  |
| 16                                                            |           |           |           |
| 212.088474 Kcal/mol 9.197038 eV -101.045696 H Child_15_21.log |           |           |           |
| 8                                                             | -8.565373 | -2.442785 | -0.055877 |
| 12                                                            | 1.199655  | 3.542665  | -0.053227 |
| 6                                                             | -7.502471 | -1.897123 | -0.062501 |
| 6                                                             | -0.833537 | 3.144505  | -0.000522 |
| 6                                                             | -6.350322 | -1.325164 | -0.051000 |
| 6                                                             | -1.396547 | 2.042640  | 0.064987  |
| 6                                                             | -5.214651 | -0.759844 | -0.026978 |
| 12                                                            | 3.197963  | 1.414162  | -0.092619 |
| 6                                                             | -4.023473 | -0.220354 | 0.018038  |
| 6                                                             | 4.729533  | 0.020276  | -0.044547 |
| 6                                                             | 8.360954  | -3.621023 | -0.040335 |
| 6                                                             | 5.690614  | -0.810321 | -0.006979 |
| 6                                                             | -2.818209 | 0.083747  | 0.141458  |
| 6                                                             | 6.675383  | -1.686991 | 0.038725  |
| 6                                                             | 7.549682  | -2.590596 | 0.065414  |
| 8                                                             | -1.681271 | 0.722730  | 0.202826  |
| 16                                                            |           |           |           |
| 212.750218 Kcal/mol 9.225734 eV -101.044641 H MutD_15_58.log  |           |           |           |
| 6                                                             | -8.167389 | 1.108749  | -0.640420 |
| 6                                                             | 0.042643  | -0.197867 | 0.697440  |
| 6                                                             | -1.167125 | -0.463589 | 0.873250  |
| 12                                                            | 1.576127  | -1.340977 | 0.042219  |
| 6                                                             | -5.171531 | -0.855509 | 0.559510  |
| 6                                                             | -7.461296 | 0.095378  | -0.175160 |
| 12                                                            | -3.183554 | -0.620696 | 0.903709  |
| 6                                                             | 6.983005  | 2.342967  | 0.230370  |
| 6                                                             | 3.471034  | -1.893550 | -0.529899 |
| 8                                                             | 5.937636  | -1.216997 | -0.780614 |
| 6                                                             | -6.308538 | -0.408579 | 0.231587  |

|                                                               |           |           |           |
|---------------------------------------------------------------|-----------|-----------|-----------|
| 6                                                             | 4.667474  | -1.605317 | -0.616913 |
| 6                                                             | 6.273381  | 0.016235  | -0.502625 |
| 8                                                             | -8.753348 | 2.016053  | -1.119167 |
| 6                                                             | 7.192875  | 3.562901  | 0.706374  |
| 6                                                             | 6.614605  | 1.156121  | -0.192331 |
| 16                                                            |           |           |           |
| 212.759952 Kcal/mol 9.226156 eV -101.044626 H Child_12_51.log |           |           |           |
| 8                                                             | -2.669740 | 3.531539  | 0.038549  |
| 6                                                             | 5.203279  | 0.116699  | -0.071507 |
| 6                                                             | -2.467171 | 2.367488  | 0.034435  |
| 12                                                            | 3.711125  | -1.229841 | -0.102591 |
| 6                                                             | -4.752578 | -0.487236 | -0.195029 |
| 8                                                             | 1.868702  | -1.809161 | 0.053459  |
| 6                                                             | -2.319725 | 1.004363  | 0.019793  |
| 6                                                             | 4.316303  | 1.044770  | -0.040444 |
| 6                                                             | -3.439948 | 0.108805  | -0.100505 |
| 6                                                             | 0.736429  | -1.340593 | 0.070834  |
| 6                                                             | -3.490379 | -1.252314 | -0.187720 |
| 6                                                             | 3.338229  | 1.994333  | 0.016766  |
| 6                                                             | -1.032350 | 0.628709  | 0.120191  |
| 6                                                             | -0.382196 | -0.727524 | 0.068026  |
| 6                                                             | 2.159350  | 2.503506  | 0.068196  |
| 12                                                            | -2.111722 | -2.898913 | 0.139735  |
| 16                                                            |           |           |           |
| 213.100313 Kcal/mol 9.240916 eV -101.044083 H Child_11_14.log |           |           |           |
| 6                                                             | 7.876822  | 0.441383  | -0.244015 |
| 6                                                             | -4.376951 | 0.624474  | 0.210337  |
| 6                                                             | 6.606868  | 0.274962  | -0.125334 |
| 6                                                             | -8.033073 | -0.473891 | -0.194911 |
| 6                                                             | 5.289388  | 0.185036  | -0.069285 |
| 6                                                             | -6.797095 | -0.169144 | -0.000030 |
| 8                                                             | 4.716147  | -1.153595 | -0.081371 |
| 6                                                             | -3.127819 | 1.037669  | 0.170408  |
| 6                                                             | 3.357786  | -1.116933 | -0.099883 |
| 6                                                             | -9.292884 | -0.678401 | -0.437149 |
| 6                                                             | 2.173530  | -1.385225 | 0.210334  |
| 6                                                             | -5.575386 | 0.214546  | 0.170727  |
| 8                                                             | 0.892355  | -1.339223 | 0.282867  |
| 6                                                             | -1.934015 | 1.459432  | -0.024506 |
| 12                                                            | -0.151888 | 0.231852  | 0.093131  |
| 12                                                            | 3.329300  | 1.223073  | -0.010809 |
| 16                                                            |           |           |           |
| 213.102686 Kcal/mol 9.241019 eV -101.044080 H Child_10_15.log |           |           |           |
| 8                                                             | 4.308453  | -1.460032 | 0.102723  |
| 6                                                             | -3.320940 | 2.428828  | -0.054746 |
| 6                                                             | 3.152613  | -1.019434 | 0.032474  |
| 6                                                             | 4.079121  | 2.556102  | 0.780477  |
| 6                                                             | 1.959609  | -1.816151 | -0.044022 |
| 6                                                             | -1.948886 | 2.356803  | -0.334518 |
| 6                                                             | 0.813536  | -2.256715 | -0.090664 |
| 8                                                             | -3.674207 | 1.237638  | 0.429343  |
| 6                                                             | -0.504034 | -2.585639 | -0.118610 |
| 6                                                             | -0.784070 | 2.062539  | -0.661317 |
| 6                                                             | 2.812812  | 0.424768  | -0.029789 |
| 6                                                             | -3.964480 | 0.124186  | 0.925868  |

|                                                                   |           |           |           |
|-------------------------------------------------------------------|-----------|-----------|-----------|
| 6                                                                 | -1.740017 | -2.703392 | -0.111657 |
| 12                                                                | 1.107058  | 1.375675  | -0.771329 |
| 6                                                                 | 3.455689  | 1.428695  | 0.593795  |
| 12                                                                | -3.535364 | -1.727706 | -0.027027 |
| 16                                                                |           |           |           |
| 213.258436 Kcal/mol 9.247773 eV -101.043831 H MutI_4_69.log       |           |           |           |
| 12                                                                | 3.734040  | 1.880767  | -0.137905 |
| 6                                                                 | -1.572052 | 0.800638  | 0.765642  |
| 8                                                                 | 0.606599  | 1.790564  | -0.277540 |
| 6                                                                 | -0.522278 | 1.312264  | 0.265235  |
| 6                                                                 | -3.973537 | -1.512944 | -1.215153 |
| 8                                                                 | -5.513514 | 1.592433  | 0.033435  |
| 6                                                                 | -4.200210 | -0.351724 | -0.721850 |
| 6                                                                 | 3.430680  | -1.603694 | -0.262718 |
| 12                                                                | -1.830624 | -1.212377 | 0.900863  |
| 6                                                                 | 1.009983  | -2.359829 | 0.143867  |
| 6                                                                 | 4.432307  | -0.678215 | -0.359609 |
| 6                                                                 | 2.318515  | -2.098141 | -0.086553 |
| 6                                                                 | -4.817490 | 0.734564  | -0.334443 |
| 6                                                                 | -0.214413 | -2.331652 | 0.388865  |
| 6                                                                 | 5.140540  | 0.350589  | -0.310013 |
| 6                                                                 | 1.703675  | 1.890703  | 0.526286  |
| 16                                                                |           |           |           |
| 213.278468 Kcal/mol 9.248641 eV -101.043799 H Original3D_17_7.log |           |           |           |
| 6                                                                 | -1.796061 | -0.405721 | -1.386743 |
| 8                                                                 | 1.405759  | 1.279009  | -1.287240 |
| 6                                                                 | 2.114879  | 2.006431  | -0.380952 |
| 6                                                                 | -0.268137 | 0.975901  | 0.398403  |
| 6                                                                 | 0.210677  | 0.837670  | -0.942897 |
| 8                                                                 | -0.174127 | -2.291304 | -0.009043 |
| 6                                                                 | 1.819684  | -1.355487 | -0.609200 |
| 6                                                                 | -2.977733 | -0.175872 | -1.095418 |
| 6                                                                 | -0.279310 | 0.321100  | 1.664700  |
| 6                                                                 | -0.385101 | -0.396389 | -1.428671 |
| 6                                                                 | 0.405940  | -1.467562 | -0.853096 |
| 6                                                                 | -1.426096 | 0.991883  | 1.210491  |
| 12                                                                | 1.103312  | -1.259407 | 1.543962  |
| 6                                                                 | 2.813623  | -1.317455 | 0.166613  |
| 6                                                                 | 2.778709  | 2.541457  | 0.563212  |
| 12                                                                | -3.429937 | 0.656293  | 0.667006  |
| 16                                                                |           |           |           |
| 213.532748 Kcal/mol 9.259668 eV -101.043394 H MutI_13_71.log      |           |           |           |
| 6                                                                 | -4.229453 | 1.835241  | 0.072983  |
| 8                                                                 | 7.123529  | 0.482714  | 0.313059  |
| 12                                                                | -5.554150 | -0.298929 | 0.338799  |
| 6                                                                 | -5.478739 | 1.711920  | 0.253818  |
| 6                                                                 | -4.080145 | -1.761715 | 0.275057  |
| 6                                                                 | -1.556036 | -1.907634 | -0.073855 |
| 6                                                                 | 4.788636  | -0.347303 | -0.051396 |
| 12                                                                | 0.176093  | -0.757383 | -0.324380 |
| 8                                                                 | -0.552255 | 0.989912  | -0.514502 |
| 6                                                                 | -1.726269 | 1.469928  | -0.335145 |
| 6                                                                 | -2.879604 | 1.810878  | -0.087338 |
| 6                                                                 | 8.246423  | 0.983954  | 0.487097  |
| 6                                                                 | -2.829878 | -2.075502 | 0.134038  |

|                                                                  |           |           |           |
|------------------------------------------------------------------|-----------|-----------|-----------|
| 6                                                                | 3.499549  | -0.672713 | -0.205432 |
| 6                                                                | 2.272053  | -0.870087 | -0.298333 |
| 6                                                                | 5.967879  | -0.027845 | 0.068261  |
| 16                                                               |           |           |           |
| 213.821219 Kcal/mol 9.272177 eV -101.042935 H Original3D_1_6.log |           |           |           |
| 6                                                                | 2.744196  | 1.150418  | -0.795778 |
| 6                                                                | 3.336874  | 2.311030  | 0.025674  |
| 6                                                                | 0.435443  | -0.084961 | -0.537622 |
| 6                                                                | 1.893068  | 0.132989  | -0.638504 |
| 6                                                                | -0.697107 | 0.598761  | -0.646852 |
| 6                                                                | 2.203280  | -1.239741 | -0.185205 |
| 6                                                                | 3.759545  | 1.971884  | -1.296439 |
| 12                                                               | -2.422108 | -1.758583 | -0.263771 |
| 8                                                                | 0.485881  | 0.692583  | 2.088741  |
| 6                                                                | 0.638305  | -1.593791 | -0.193661 |
| 6                                                                | -3.271259 | 0.239921  | -0.690140 |
| 12                                                               | -4.708727 | 1.582950  | 0.037923  |
| 6                                                                | -1.975751 | 0.513123  | -0.512917 |
| 8                                                                | 3.210017  | -1.784572 | 0.199415  |
| 6                                                                | -0.378376 | -2.403631 | -0.237386 |
| 6                                                                | 0.645589  | 0.211250  | 3.109655  |
| 16                                                               |           |           |           |
| 214.311716 Kcal/mol 9.293447 eV -101.042153 H Child_2_14.log     |           |           |           |
| 6                                                                | -4.489933 | 4.219388  | -0.057385 |
| 12                                                               | 5.217411  | 0.486794  | -0.162710 |
| 6                                                                | -4.497247 | 2.888275  | -0.016720 |
| 6                                                                | 3.277746  | -0.410006 | 0.329346  |
| 6                                                                | -4.585331 | 1.613088  | -0.049679 |
| 6                                                                | 2.851578  | 0.906897  | 0.168499  |
| 12                                                               | -4.263882 | -0.392016 | 0.021970  |
| 6                                                                | 3.655340  | 2.073849  | -0.100364 |
| 6                                                                | -2.979975 | -1.955024 | -0.114581 |
| 6                                                                | 1.870855  | -0.166585 | 0.283197  |
| 6                                                                | -0.299899 | -4.869180 | -0.548097 |
| 8                                                                | 3.366385  | 3.265483  | -0.201907 |
| 6                                                                | -1.822806 | -1.460707 | 0.061752  |
| 6                                                                | 0.613229  | -0.615634 | 0.222110  |
| 6                                                                | -0.550988 | -1.049334 | 0.183692  |
| 8                                                                | 0.421396  | -4.288921 | 0.141691  |
| 16                                                               |           |           |           |
| 214.659891 Kcal/mol 9.308546 eV -101.041598 H Child_9_43.log     |           |           |           |
| 8                                                                | 3.860947  | 1.476607  | 0.240484  |
| 6                                                                | -3.884220 | -0.649137 | 0.177707  |
| 6                                                                | 1.962851  | 3.120439  | -0.251460 |
| 6                                                                | -2.494066 | -0.552447 | -0.088635 |
| 6                                                                | 2.492961  | 1.913856  | -0.045946 |
| 6                                                                | -5.023681 | -0.141639 | 0.389014  |
| 6                                                                | 3.317226  | 0.094393  | 0.222715  |
| 12                                                               | -3.710094 | 1.619644  | 0.165842  |
| 6                                                                | 2.035646  | 0.512535  | -0.039674 |
| 8                                                                | -0.313459 | -2.272091 | -0.112024 |
| 12                                                               | 3.003426  | -1.944817 | 0.236381  |
| 6                                                                | -1.863011 | 0.688659  | -0.177659 |
| 6                                                                | -0.510750 | -0.036463 | -0.489350 |
| 6                                                                | 0.974203  | -1.700838 | -0.034296 |

|                                                               |           |           |           |
|---------------------------------------------------------------|-----------|-----------|-----------|
| 6                                                             | -1.166043 | -1.246255 | -0.442858 |
| 6                                                             | 0.842235  | -0.292113 | -0.195283 |
| 16                                                            |           |           |           |
| 214.735728 Kcal/mol 9.311834 eV -101.041477 H MutI_12_75.log  |           |           |           |
| 8                                                             | 0.409199  | -1.180397 | -1.113313 |
| 6                                                             | 1.808134  | 2.613058  | -0.383504 |
| 8                                                             | 1.697028  | -1.880081 | 0.695918  |
| 12                                                            | -0.230536 | 2.723082  | -0.169243 |
| 6                                                             | -0.663896 | -1.146000 | 1.123685  |
| 6                                                             | -1.846817 | -0.585918 | 1.263840  |
| 12                                                            | -2.605210 | 1.500412  | 0.612460  |
| 6                                                             | -2.038157 | -1.074946 | -1.625054 |
| 6                                                             | -3.126626 | -0.935512 | 0.644767  |
| 6                                                             | 2.667125  | -0.963103 | 0.409833  |
| 6                                                             | 4.036569  | -0.694793 | 0.123071  |
| 6                                                             | 0.421441  | -1.418450 | 0.423199  |
| 6                                                             | -2.945496 | -0.915847 | -0.621048 |
| 6                                                             | 2.427538  | 1.557384  | -0.183420 |
| 6                                                             | -0.807292 | -1.105343 | -1.573711 |
| 6                                                             | 2.930666  | 0.303121  | 0.068436  |
| 16                                                            |           |           |           |
| 215.152509 Kcal/mol 9.329908 eV -101.040813 H Child_10_53.log |           |           |           |
| 6                                                             | -3.923069 | 1.456370  | -0.106930 |
| 6                                                             | 4.164864  | 1.788415  | 0.809776  |
| 6                                                             | -3.982511 | 0.228892  | 0.016776  |
| 6                                                             | 3.379599  | 0.857096  | 0.026330  |
| 8                                                             | -3.980668 | -1.110803 | 0.143569  |
| 6                                                             | 2.817153  | -1.610724 | -0.172557 |
| 12                                                            | -2.236110 | 2.529354  | -0.121988 |
| 6                                                             | 2.494645  | -2.827215 | -0.218685 |
| 6                                                             | -2.757863 | -1.676246 | 0.104251  |
| 6                                                             | 2.608767  | -0.243928 | -0.044514 |
| 6                                                             | -0.285660 | 2.009249  | -0.005821 |
| 6                                                             | 4.014535  | 2.002701  | -0.559865 |
| 6                                                             | -1.598262 | -2.079651 | 0.040337  |
| 8                                                             | 1.153309  | -0.111930 | 0.078569  |
| 6                                                             | 0.479193  | 1.046473  | 0.041902  |
| 12                                                            | 0.415322  | -2.189916 | 0.008396  |
| 16                                                            |           |           |           |
| 215.197545 Kcal/mol 9.331861 eV -101.040741 H MutI_15_71.log  |           |           |           |
| 6                                                             | -3.076771 | -2.318281 | -0.068794 |
| 8                                                             | 1.753266  | 2.669655  | -0.667633 |
| 12                                                            | -0.350211 | -1.868972 | -0.762563 |
| 6                                                             | -3.740760 | -3.260549 | 0.482236  |
| 6                                                             | -2.805118 | 0.076980  | -0.300554 |
| 6                                                             | -0.360029 | 3.495352  | 0.458333  |
| 12                                                            | 3.924206  | -1.322213 | 0.304611  |
| 8                                                             | 1.177147  | -2.580668 | 0.108370  |
| 6                                                             | 3.249808  | 0.608854  | -0.106686 |
| 6                                                             | 0.744197  | 3.090918  | -0.003569 |
| 6                                                             | 2.450756  | 1.556729  | -0.349507 |
| 6                                                             | 2.131371  | -2.828854 | 0.886238  |
| 6                                                             | -2.594638 | 2.501526  | 0.422991  |
| 6                                                             | -1.701564 | 3.288467  | 0.614738  |
| 6                                                             | -2.345353 | -1.206053 | -0.428615 |



|                                                               |           |           |           |
|---------------------------------------------------------------|-----------|-----------|-----------|
| 6                                                             | -3.007107 | 1.258631  | 0.054777  |
| 16                                                            |           |           |           |
| 215.400380 Kcal/mol 9.340656 eV -101.040418 H MutD_16_48.log  |           |           |           |
| 6                                                             | -1.674867 | 2.451910  | -1.334118 |
| 6                                                             | -1.492210 | 1.127580  | -0.850647 |
| 6                                                             | 1.984248  | -1.844587 | -0.055856 |
| 8                                                             | -0.498611 | -2.097909 | -0.190437 |
| 6                                                             | 2.889025  | 0.236640  | 0.144375  |
| 6                                                             | -0.389748 | 2.035421  | -0.896792 |
| 12                                                            | 1.598621  | 1.922366  | -0.307562 |
| 6                                                             | 2.643686  | 2.049279  | 1.996582  |
| 6                                                             | 3.230443  | -1.164794 | -0.092884 |
| 12                                                            | -1.908203 | -0.852478 | -0.322957 |
| 6                                                             | 0.762162  | -2.005476 | -0.127270 |
| 6                                                             | -6.328179 | 0.015248  | 1.028750  |
| 8                                                             | 4.367156  | -1.594601 | -0.351798 |
| 6                                                             | -5.128538 | -0.385543 | 0.638237  |
| 6                                                             | -3.954166 | -0.765349 | 0.299989  |
| 6                                                             | 2.919246  | 1.033243  | 1.233655  |
| 16                                                            |           |           |           |
| 215.924527 Kcal/mol 9.363386 eV -101.039583 H Child_12_38.log |           |           |           |
| 6                                                             | -5.139110 | -1.091118 | 0.302699  |
| 8                                                             | 4.585234  | 0.807534  | 0.217119  |
| 6                                                             | -4.256013 | -0.107971 | 0.152681  |
| 6                                                             | 3.969478  | -0.381233 | 0.169976  |
| 8                                                             | -4.298681 | 1.355346  | 0.152369  |
| 6                                                             | 3.412894  | -1.481633 | 0.113454  |
| 6                                                             | -2.751484 | 0.004940  | -0.035093 |
| 6                                                             | 3.947944  | 2.053896  | 0.085093  |
| 6                                                             | -2.890292 | 1.421781  | -0.013178 |
| 6                                                             | 2.557205  | 1.924236  | -0.070715 |
| 6                                                             | -1.507169 | -0.538342 | -0.142372 |
| 12                                                            | 1.784304  | -2.611796 | -0.033387 |
| 6                                                             | -0.968638 | -1.790255 | -0.189948 |
| 6                                                             | 1.318944  | 2.021892  | -0.176545 |
| 12                                                            | -0.696033 | 1.563342  | -0.221041 |
| 6                                                             | -0.252371 | -2.823124 | -0.179846 |
| 16                                                            |           |           |           |
| 216.654028 Kcal/mol 9.395020 eV -101.038420 H Child_12_55.log |           |           |           |
| 6                                                             | -3.074583 | 2.897640  | -0.260942 |
| 8                                                             | 3.420310  | -1.210897 | -0.929981 |
| 6                                                             | -1.759418 | 2.206733  | -0.131204 |
| 6                                                             | 4.574731  | -0.643168 | -0.763275 |
| 6                                                             | -2.839100 | 1.546286  | -0.704432 |
| 6                                                             | -1.366223 | -2.299547 | 0.820174  |
| 12                                                            | 0.044974  | 2.025088  | 0.876645  |
| 8                                                             | -3.157560 | -1.983042 | -0.906916 |
| 6                                                             | 1.239205  | 0.028196  | 2.087210  |
| 6                                                             | -0.327439 | -1.892423 | 1.583983  |
| 6                                                             | 1.547812  | 1.247849  | 1.960608  |
| 6                                                             | -2.224901 | -2.229074 | -0.057231 |
| 6                                                             | 0.559773  | -1.180353 | 2.057243  |
| 6                                                             | 5.397536  | 0.156891  | -0.970151 |
| 12                                                            | -3.584404 | -0.255933 | -1.480063 |
| 6                                                             | 5.001135  | 0.881246  | -1.965948 |

```

16
216.904612 Kcal/mol 9.405886 eV -101.038021 H Original3D_13_3.log
8   0.118411   0.997232   -3.011785
6   0.454958   -0.180979   0.337975
6   -0.442597   1.811464   0.877603
6   0.084039   0.463288   -1.945969
6   2.702775   -0.525309   0.239353
6   -4.329309   0.878510   0.213251
8   -1.683838   -1.634340   0.186155
6   1.424677   -0.939889   1.214016
6   -0.783599   0.480694   0.532215
6   -1.974021   -0.331759   0.336949
6   0.469434   2.689378   1.003995
6   2.071909   -1.616847   -0.355100
6   1.262485   -0.237179   -0.862076
12  2.158788   1.503859   0.734756
6   -3.227528   0.206572   0.282251
12  0.028218   -2.428093   0.211766
16
217.335415 Kcal/mol 9.424567 eV -101.037334 H Child_15_27.log
6   1.629584   2.732714   0.038579
8   -4.095614   -2.027917   0.781968
6   1.547545   1.315095   -0.026920
6   -3.112970   -1.418614   0.331070
6   0.389126   2.084235   0.288419
6   -1.876420   -1.935793   -0.146681
6   4.148423   -0.559229   0.035808
6   -3.527314   1.011086   -0.468471
12  2.029699   -0.685064   -0.343255
6   -2.973602   0.038929   0.290925
6   5.385823   -0.312237   0.230888
6   -3.686669   2.195884   -0.987862
6   6.697270   -0.255567   0.335948
6   -0.664863   -1.911379   -0.393871
8   0.585337   -1.866075   -0.617259
12  -1.667480   1.788497   0.469533
16
217.410162 Kcal/mol 9.427809 eV -101.037215 H Child_13_20.log
6   -0.378685   3.225523   -1.816367
12  -4.651257   -1.275048   -1.549377
8   -1.125452   3.027611   -0.965303
6   2.065821   -1.357917   -0.751997
6   -5.827468   0.372599   2.088424
6   0.881118   -1.319752   -0.395478
8   7.671724   0.768192   1.225962
6   -0.378069   -1.068232   -0.004630
6   -4.740021   0.297807   1.393896
6   -1.493663   -0.743573   0.375095
6   6.728648   0.238485   0.689193
6   -2.719866   -0.295717   0.743722
6   -3.345650   0.951487   1.224083
6   -4.040213   -0.594299   0.418562
6   5.720155   -0.336615   0.140795
12  4.051022   -0.940385   -0.677045
16

```

217.741072 Kcal/mol 9.442158 eV -101.036688 H Child\_13\_9.log

|    |           |           |           |
|----|-----------|-----------|-----------|
| 6  | -5.898385 | -2.810494 | -0.025970 |
| 8  | 0.007573  | 1.868443  | -0.114612 |
| 6  | -6.219325 | -1.605424 | 0.612874  |
| 6  | 1.923541  | 0.540903  | 0.353063  |
| 6  | -4.934443 | -1.766794 | 0.005807  |
| 6  | 2.322645  | -0.669395 | 0.582767  |
| 6  | 5.396447  | -3.429526 | -0.586604 |
| 6  | 1.492131  | 1.762864  | 0.141754  |
| 6  | -2.541285 | -0.871834 | -0.477835 |
| 6  | 2.692245  | -1.890666 | 0.826509  |
| 6  | -3.701500 | -1.274844 | -0.266508 |
| 6  | 2.006208  | 3.085786  | 0.071913  |
| 8  | 5.678024  | -4.426008 | -0.089042 |
| 6  | 1.926011  | 4.345331  | 0.012278  |
| 12 | -0.198371 | 3.822701  | -0.093139 |
| 12 | -0.824172 | 0.174388  | -0.396116 |

16

217.893612 Kcal/mol 9.448773 eV -101.036445 H MutI\_18\_67.log

|    |           |           |           |
|----|-----------|-----------|-----------|
| 12 | -0.550006 | -2.769694 | 0.053975  |
| 6  | -2.556595 | 1.764285  | -0.039514 |
| 6  | -1.342664 | 2.266174  | -0.043630 |
| 12 | 4.483751  | -1.084088 | -0.153195 |
| 6  | -5.293946 | 0.570753  | -0.101496 |
| 6  | 2.214282  | -1.252075 | -0.013617 |
| 6  | 3.674386  | 1.515679  | 0.103530  |
| 6  | -2.134206 | -1.324388 | 0.047279  |
| 6  | -4.169915 | -0.156956 | 0.012921  |
| 8  | -3.428878 | -1.387972 | 0.079162  |
| 6  | 2.416654  | 1.985150  | 0.065644  |
| 6  | -3.668546 | 1.136828  | -0.039836 |
| 6  | -0.097036 | 2.409628  | -0.023845 |
| 6  | 1.220316  | 2.328270  | 0.020523  |
| 8  | 1.223624  | -1.986163 | -0.013762 |
| 6  | 4.810118  | 0.963062  | 0.123280  |

16

218.191353 Kcal/mol 9.461684 eV -101.035970 H MutI\_10\_65.log

|    |           |           |           |
|----|-----------|-----------|-----------|
| 6  | -6.191419 | 0.106544  | 1.015233  |
| 6  | -4.997606 | -0.281616 | 0.638628  |
| 6  | 1.362033  | 2.753984  | 0.530019  |
| 8  | 2.239442  | -2.247569 | 0.046064  |
| 12 | 4.060632  | -0.863308 | 0.122766  |
| 6  | -0.568639 | 2.562732  | -0.756645 |
| 6  | 0.301429  | 3.233630  | -0.129074 |
| 6  | 2.148506  | 1.832648  | 0.827845  |
| 6  | -2.718935 | -1.221695 | -0.173134 |
| 12 | 0.587448  | -1.588365 | -0.683520 |
| 6  | -0.692851 | 1.398884  | -1.444587 |
| 6  | -3.864321 | -0.744386 | 0.239778  |
| 6  | 2.364254  | 0.440209  | 0.814575  |
| 8  | 1.758229  | -0.538321 | 1.219008  |
| 6  | -0.214947 | 0.263982  | -1.778400 |
| 6  | -1.553891 | -1.727051 | -0.349494 |

16

218.488057 Kcal/mol 9.474551 eV -101.035497 H MutI\_1\_79.log

|                                                               |           |           |           |
|---------------------------------------------------------------|-----------|-----------|-----------|
| 6                                                             | 2.669995  | -2.239973 | -0.176206 |
| 6                                                             | 0.093494  | 0.307032  | -1.786778 |
| 6                                                             | -3.567330 | 3.203758  | 0.085964  |
| 6                                                             | 5.089738  | -1.286745 | -0.084864 |
| 8                                                             | 3.617462  | 1.813479  | 1.514289  |
| 6                                                             | 1.461079  | -2.637846 | -0.149997 |
| 6                                                             | 2.780858  | 2.381782  | 0.901840  |
| 6                                                             | -0.927689 | 0.914508  | -1.387527 |
| 6                                                             | -2.609117 | -0.131769 | -0.247774 |
| 12                                                            | -4.153155 | -2.081446 | 1.546416  |
| 8                                                             | 1.952161  | 2.959366  | 0.279277  |
| 6                                                             | -2.902500 | 2.247136  | -0.519383 |
| 6                                                             | -2.729054 | -1.287293 | 0.229355  |
| 6                                                             | 3.921871  | -1.773193 | -0.184345 |
| 12                                                            | -0.112243 | -1.511814 | -0.702898 |
| 6                                                             | -2.176711 | 1.125328  | -0.758743 |
| 16                                                            |           |           |           |
| 219.539713 Kcal/mol 9.520155 eV -101.033822 H Child_18_27.log |           |           |           |
| 12                                                            | -2.831994 | 3.481246  | -0.191819 |
| 6                                                             | 3.844955  | 0.234691  | 0.595021  |
| 6                                                             | -1.365137 | -0.771674 | 0.646509  |
| 6                                                             | 5.063114  | 0.559538  | 0.809417  |
| 6                                                             | -2.783363 | -0.838956 | 0.544443  |
| 6                                                             | 6.335515  | 0.874915  | 1.050573  |
| 6                                                             | -3.423952 | -2.041688 | 0.544959  |
| 12                                                            | 1.832207  | -0.196031 | 0.253075  |
| 6                                                             | -3.387047 | 0.437066  | 0.399236  |
| 6                                                             | 1.558537  | -2.395982 | -1.001080 |
| 6                                                             | -0.137255 | -0.613769 | 0.657694  |
| 6                                                             | -3.689692 | 1.636165  | 0.294587  |
| 8                                                             | 1.021691  | -3.294702 | -1.459582 |
| 6                                                             | -3.833614 | -3.254545 | 0.430083  |
| 6                                                             | 0.698485  | 2.113948  | -1.748382 |
| 8                                                             | 1.317580  | 1.412098  | -1.049598 |
| 16                                                            |           |           |           |
| 220.352312 Kcal/mol 9.555393 eV -101.032527 H Child_17_19.log |           |           |           |
| 12                                                            | -4.271719 | -1.141045 | -0.238640 |
| 6                                                             | 9.018313  | 0.641200  | 0.321159  |
| 12                                                            | -1.752704 | -2.568939 | 0.115320  |
| 6                                                             | 7.915633  | 0.857955  | -0.353332 |
| 6                                                             | 0.736241  | -0.888463 | 0.495406  |
| 6                                                             | -1.669064 | 2.331438  | 0.248327  |
| 8                                                             | 1.444130  | -0.877971 | 1.530573  |
| 6                                                             | 6.839476  | 1.256559  | -0.978914 |
| 6                                                             | -4.850239 | 0.825297  | -0.509616 |
| 6                                                             | -2.081537 | 3.707156  | 0.059521  |
| 6                                                             | -4.087365 | 1.796453  | -0.317192 |
| 6                                                             | -0.790254 | 1.271790  | 0.324618  |
| 6                                                             | 0.450578  | -2.188132 | -0.204259 |
| 6                                                             | -0.130339 | 0.232526  | 0.238780  |
| 6                                                             | -2.964267 | 2.571342  | -0.059949 |
| 8                                                             | 1.302123  | -2.868393 | -0.794005 |
| 16                                                            |           |           |           |
| 220.637429 Kcal/mol 9.567757 eV -101.032072 H Child_3_45.log  |           |           |           |
| 6                                                             | 5.492224  | 0.512274  | 1.088228  |

|                                                                   |           |           |           |
|-------------------------------------------------------------------|-----------|-----------|-----------|
| 12                                                                | -0.185226 | -3.151253 | 0.269772  |
| 6                                                                 | 4.350771  | 0.755854  | 0.592897  |
| 6                                                                 | -2.026199 | -2.442491 | 0.011012  |
| 6                                                                 | -0.356541 | 1.890837  | -0.315436 |
| 6                                                                 | 1.727669  | -2.338172 | 0.203002  |
| 6                                                                 | 3.225205  | 1.128183  | -0.005813 |
| 6                                                                 | -2.785586 | -1.456687 | -0.156241 |
| 6                                                                 | -1.521066 | 1.897521  | 0.075796  |
| 6                                                                 | 2.346485  | -1.403956 | -0.392343 |
| 12                                                                | 1.558637  | 1.741655  | -1.026945 |
| 6                                                                 | -3.599673 | -0.566926 | -0.809262 |
| 6                                                                 | -2.812129 | 1.560979  | 0.517502  |
| 6                                                                 | 2.472528  | -0.128011 | -0.709066 |
| 8                                                                 | -3.519011 | 0.817569  | -0.517691 |
| 8                                                                 | -3.426370 | 1.739775  | 1.578244  |
| 16                                                                |           |           |           |
| 220.813205 Kcal/mol 9.575379 eV -101.031792 H Original2D_0_22.log |           |           |           |
| 6                                                                 | -0.000000 | -0.887616 | -0.000000 |
| 12                                                                | -2.110127 | -0.489453 | -0.000000 |
| 6                                                                 | -2.258540 | 2.644202  | -0.000000 |
| 6                                                                 | 0.233589  | 1.796071  | 0.000000  |
| 6                                                                 | 1.302022  | -0.382133 | 0.000000  |
| 6                                                                 | -4.436909 | 1.427410  | -0.000000 |
| 6                                                                 | -5.741164 | 1.337372  | -0.000000 |
| 12                                                                | 1.656860  | -2.643937 | -0.000000 |
| 8                                                                 | -2.734036 | 3.786024  | 0.000000  |
| 6                                                                 | 6.205689  | -4.045978 | 0.000000  |
| 6                                                                 | 2.782601  | 1.248828  | 0.000000  |
| 6                                                                 | 1.432394  | 1.034569  | 0.000000  |
| 6                                                                 | -3.102481 | 1.380068  | -0.000000 |
| 6                                                                 | -0.594641 | -2.104059 | -0.000000 |
| 8                                                                 | 7.182833  | -3.442277 | 0.000000  |
| 6                                                                 | -0.847753 | 2.359715  | 0.000000  |
| 16                                                                |           |           |           |
| 221.286506 Kcal/mol 9.595903 eV -101.031038 H Original3D_1_7.log  |           |           |           |
| 6                                                                 | -0.024302 | -0.917029 | 0.450822  |
| 8                                                                 | 3.290169  | -4.598949 | 1.244957  |
| 12                                                                | -2.960461 | 0.327327  | 1.075957  |
| 6                                                                 | -0.413793 | 2.322202  | 1.035085  |
| 6                                                                 | -3.974095 | -0.688760 | -0.435308 |
| 6                                                                 | -1.753667 | 1.976622  | 1.469529  |
| 6                                                                 | -1.260011 | 3.305796  | 1.635562  |
| 6                                                                 | -1.718828 | -1.473709 | -1.575805 |
| 6                                                                 | -0.831785 | -1.245287 | -0.457580 |
| 12                                                                | 0.967193  | 0.899222  | 0.326964  |
| 8                                                                 | -1.306063 | -1.795491 | -2.699635 |
| 6                                                                 | 3.495288  | -3.539164 | 1.634630  |
| 6                                                                 | -3.060407 | -1.128686 | -1.156011 |
| 6                                                                 | 4.717262  | 3.115398  | -1.534300 |
| 6                                                                 | 2.592904  | 1.830143  | -0.740252 |
| 6                                                                 | 3.572496  | 2.515299  | -1.192643 |
| 16                                                                |           |           |           |
| 221.963996 Kcal/mol 9.625282 eV -101.029958 H Child_1_40.log      |           |           |           |
| 12                                                                | -5.966399 | 0.342451  | -1.296298 |
| 12                                                                | 0.736808  | -1.354701 | 1.155437  |

|                                                               |           |           |           |
|---------------------------------------------------------------|-----------|-----------|-----------|
| 6                                                             | -4.280650 | -0.362730 | -0.369568 |
| 6                                                             | 2.753795  | -1.470069 | 0.455541  |
| 6                                                             | -3.256625 | -0.940539 | -0.016135 |
| 6                                                             | 1.718166  | 0.835141  | 0.887356  |
| 6                                                             | -2.020528 | -1.403784 | 0.437862  |
| 6                                                             | 4.453602  | -0.637650 | -1.483902 |
| 6                                                             | 1.380419  | 2.065119  | 0.724503  |
| 6                                                             | -1.422987 | -2.172108 | 1.357032  |
| 6                                                             | 0.659701  | 3.135630  | 0.543966  |
| 6                                                             | 3.602816  | -0.718155 | -0.449822 |
| 6                                                             | 5.094302  | -0.469842 | -2.582242 |
| 6                                                             | 2.695597  | -0.071320 | 0.440488  |
| 8                                                             | 0.055286  | 4.126193  | 0.299472  |
| 8                                                             | -0.744104 | -0.950087 | -0.046990 |
| 16                                                            |           |           |           |
| 222.199726 Kcal/mol 9.635504 eV -101.029583 H Child_15_23.log |           |           |           |
| 6                                                             | -1.646644 | -0.285080 | -2.158750 |
| 8                                                             | 5.770954  | 2.420323  | 0.212279  |
| 6                                                             | -2.362288 | -0.141371 | -1.053247 |
| 6                                                             | 4.986269  | 1.526699  | 0.176570  |
| 6                                                             | -4.221003 | 1.199174  | 0.086346  |
| 8                                                             | -3.290138 | -1.570040 | 1.778080  |
| 6                                                             | -3.473943 | 0.099816  | -0.119815 |
| 6                                                             | 4.171547  | 0.529913  | 0.156975  |
| 12                                                            | 0.162901  | -1.293425 | -0.910184 |
| 6                                                             | -2.970854 | -1.070158 | 0.705439  |
| 6                                                             | 2.996259  | 0.036824  | -0.362540 |
| 12                                                            | 3.919706  | -1.560299 | 0.827640  |
| 6                                                             | -5.230723 | 2.172859  | 0.157371  |
| 6                                                             | -1.791579 | -1.247371 | -0.178481 |
| 6                                                             | -4.030644 | 2.595823  | 0.682123  |
| 6                                                             | 2.100636  | -0.843391 | -0.580715 |
| 16                                                            |           |           |           |
| 223.155249 Kcal/mol 9.676940 eV -101.028060 H Child_18_8.log  |           |           |           |
| 6                                                             | 4.652562  | 0.214097  | 0.215147  |
| 12                                                            | -3.318200 | -1.114158 | 1.322314  |
| 6                                                             | 3.375068  | 0.198889  | 0.175014  |
| 6                                                             | -4.032275 | -0.858853 | -0.655034 |
| 6                                                             | 5.957294  | 0.266273  | 0.288933  |
| 8                                                             | -3.643108 | 0.378803  | -0.764405 |
| 6                                                             | 2.058918  | 0.320335  | 0.096041  |
| 6                                                             | -3.159494 | 1.526799  | -0.987305 |
| 6                                                             | 1.449558  | 1.589249  | -0.033281 |
| 12                                                            | -1.142371 | 1.773320  | -0.143971 |
| 6                                                             | 0.761823  | 2.628583  | -0.076474 |
| 6                                                             | -0.212515 | -0.631828 | 0.635478  |
| 6                                                             | 1.299260  | -1.943393 | -0.597527 |
| 8                                                             | 1.419019  | -2.946719 | -1.165227 |
| 6                                                             | 1.102809  | -0.826581 | 0.106520  |
| 6                                                             | -1.366414 | -0.378008 | 1.048646  |
| 16                                                            |           |           |           |
| 223.579745 Kcal/mol 9.695348 eV -101.027383 H Child_5_57.log  |           |           |           |
| 12                                                            | 3.131314  | -0.865348 | -0.814257 |
| 6                                                             | -8.040180 | 3.326977  | -0.596687 |
| 6                                                             | 3.384377  | 0.933072  | 0.280471  |

|                                                               |           |           |           |
|---------------------------------------------------------------|-----------|-----------|-----------|
| 6                                                             | -0.966420 | -1.238403 | 1.671199  |
| 6                                                             | 1.695052  | -2.324284 | -1.100220 |
| 6                                                             | 0.147592  | -0.722833 | 1.738241  |
| 6                                                             | 3.882801  | 2.104810  | 0.004937  |
| 8                                                             | -7.069388 | 3.448778  | 0.028898  |
| 6                                                             | 0.568747  | -2.852772 | -0.806449 |
| 6                                                             | 1.334905  | -0.131749 | 1.507388  |
| 6                                                             | 4.360134  | 3.276074  | -0.363194 |
| 6                                                             | 2.345040  | 0.442196  | 1.049704  |
| 6                                                             | 4.610179  | 4.486619  | -0.720062 |
| 12                                                            | -2.311565 | -2.013941 | 0.294782  |
| 6                                                             | -0.625053 | -3.248555 | -0.343949 |
| 8                                                             | -3.683115 | -2.168208 | -0.990720 |
| 16                                                            |           |           |           |
| 223.795152 Kcal/mol 9.704689 eV -101.027040 H MutI_13_73.log  |           |           |           |
| 6                                                             | -4.990399 | 2.566786  | 0.813562  |
| 6                                                             | -4.933469 | 1.302790  | 0.608621  |
| 6                                                             | 1.111390  | 1.675056  | -0.332434 |
| 6                                                             | -5.402767 | -0.689306 | -0.863671 |
| 6                                                             | 7.089411  | -0.785314 | 0.101031  |
| 6                                                             | -0.178882 | 1.877295  | -0.398243 |
| 6                                                             | 2.316690  | 1.316990  | -0.280205 |
| 12                                                            | -4.599602 | -2.619800 | 0.155492  |
| 8                                                             | -4.475403 | -0.991490 | 1.188425  |
| 6                                                             | 9.633230  | -1.335939 | 0.290720  |
| 6                                                             | -4.963029 | -0.019194 | 0.354798  |
| 12                                                            | 4.209587  | 0.610628  | -0.098794 |
| 6                                                             | 5.901647  | -0.358362 | 0.031462  |
| 6                                                             | 8.364706  | -1.150325 | 0.177642  |
| 8                                                             | -1.337879 | 2.012759  | -0.488136 |
| 6                                                             | -5.417455 | -1.743826 | -1.550396 |
| 16                                                            |           |           |           |
| 224.716995 Kcal/mol 9.744663 eV -101.025571 H Child_11_11.log |           |           |           |
| 6                                                             | 5.553464  | 1.142345  | 1.747998  |
| 12                                                            | -3.086703 | 0.202573  | -0.892490 |
| 6                                                             | 5.114082  | 0.332219  | 0.846968  |
| 6                                                             | -2.036672 | -1.028508 | 0.543220  |
| 8                                                             | -2.145532 | 3.221266  | 0.838111  |
| 12                                                            | 1.830549  | -1.361835 | -1.413526 |
| 6                                                             | 4.440226  | -0.372288 | -0.066540 |
| 6                                                             | -2.505967 | -2.121551 | 1.061160  |
| 6                                                             | -0.563566 | 1.102418  | 0.583733  |
| 6                                                             | -1.590689 | 1.747799  | -1.153014 |
| 6                                                             | -1.609346 | 2.328301  | 0.223899  |
| 8                                                             | -2.991985 | -3.133623 | 1.449108  |
| 6                                                             | -0.760223 | -0.368054 | 0.414840  |
| 6                                                             | -0.423115 | 0.890393  | -0.897118 |
| 6                                                             | 0.047754  | -0.482294 | -0.849323 |
| 6                                                             | 3.696381  | -0.969114 | -0.893415 |
| 16                                                            |           |           |           |
| 224.921673 Kcal/mol 9.753539 eV -101.025245 H MutI_2_71.log   |           |           |           |
| 12                                                            | 3.396524  | 0.662298  | 0.642946  |
| 8                                                             | -1.978634 | 4.101974  | -2.047959 |
| 6                                                             | 0.146914  | 0.051616  | 0.886350  |
| 6                                                             | -2.028236 | -3.530148 | -1.036492 |

|    |           |           |           |
|----|-----------|-----------|-----------|
| 8  | -1.251229 | 1.906057  | 1.784289  |
| 6  | -1.625163 | -1.239849 | 0.124309  |
| 6  | 5.982675  | 0.312855  | -1.107638 |
| 12 | 0.009671  | -3.121644 | -0.683871 |
| 6  | -3.549957 | 0.307055  | 0.600467  |
| 6  | -1.163076 | 0.837494  | 1.209352  |
| 6  | 4.919118  | 0.090928  | -0.436585 |
| 6  | -2.263964 | -0.019786 | 0.651325  |
| 6  | 1.369877  | 0.483104  | 1.096292  |
| 6  | -1.886337 | 3.226822  | -1.308213 |
| 6  | -0.241723 | -1.204633 | 0.246465  |
| 6  | -2.166035 | -2.407474 | -0.492222 |

16

226.291824 Kcal/mol 9.812955 eV -101.023061 H Child\_1\_24.log

|    |           |           |           |
|----|-----------|-----------|-----------|
| 6  | -1.470059 | 0.856793  | 0.977900  |
| 6  | 3.831660  | 0.430210  | -2.027445 |
| 6  | -0.273640 | 1.243786  | 1.464046  |
| 6  | -1.312179 | -0.726204 | -1.600320 |
| 12 | -2.136892 | -1.115663 | 1.445749  |
| 6  | 3.299203  | 0.723103  | -0.901021 |
| 6  | 0.946674  | 1.378352  | 1.779838  |
| 6  | -1.572173 | -1.860564 | -0.836797 |
| 6  | -1.815814 | -2.677941 | 0.092578  |
| 12 | 2.740238  | 0.763124  | 0.987494  |
| 6  | -1.470731 | 0.610016  | -1.398519 |
| 6  | -0.770614 | 0.197709  | -2.602267 |
| 8  | 2.347073  | -1.526225 | 0.877732  |
| 8  | -2.862356 | 2.297407  | -0.375817 |
| 6  | 2.089565  | -1.914887 | -0.194946 |
| 6  | -2.001538 | 1.416461  | -0.288755 |

16

226.706647 Kcal/mol 9.830943 eV -101.022400 H MutI\_18\_63.log

|    |           |           |           |
|----|-----------|-----------|-----------|
| 6  | 2.084393  | 1.955761  | 0.503072  |
| 12 | 4.172464  | 0.138535  | -1.215396 |
| 6  | -2.616186 | 1.579114  | -0.365007 |
| 6  | -0.747811 | -1.803679 | 0.298115  |
| 6  | -1.640658 | 2.198511  | 0.052817  |
| 8  | -3.310146 | -1.841220 | -0.019723 |
| 6  | -5.017764 | 0.159842  | -0.415921 |
| 6  | -3.864480 | -0.658195 | -0.281757 |
| 6  | -3.624985 | 0.658604  | -0.464712 |
| 12 | 2.258993  | -1.055094 | 0.470077  |
| 6  | 0.829259  | 2.500454  | 0.643165  |
| 6  | 4.715936  | -1.926843 | 0.074683  |
| 8  | 0.526962  | -1.719217 | 0.478486  |
| 6  | 3.080536  | 1.288794  | 0.213769  |
| 6  | -1.952058 | -1.894952 | 0.164693  |
| 6  | -0.398184 | 2.522956  | 0.456037  |

16

226.723289 Kcal/mol 9.831665 eV -101.022374 H Original3D\_13\_4.log

|    |           |           |           |
|----|-----------|-----------|-----------|
| 6  | -1.039836 | 2.311178  | -1.024993 |
| 8  | 0.106896  | 2.341043  | -0.987246 |
| 6  | 0.921153  | -0.455517 | 0.907147  |
| 12 | -3.803437 | 0.757435  | -0.421530 |
| 8  | -0.537175 | -1.781351 | -0.140953 |



|                                                                   |           |           |           |
|-------------------------------------------------------------------|-----------|-----------|-----------|
| 6                                                                 | -0.333847 | -0.920777 | 1.082348  |
| 6                                                                 | 1.603990  | 0.581475  | 1.648063  |
| 6                                                                 | 2.745439  | 0.928604  | 1.225392  |
| 12                                                                | -2.105183 | 0.098245  | 1.702911  |
| 6                                                                 | 0.901601  | -1.783765 | -1.211984 |
| 6                                                                 | -2.799706 | -0.953947 | -1.008264 |
| 6                                                                 | -1.736577 | -1.519551 | -0.706404 |
| 6                                                                 | 3.479388  | 0.575934  | 0.133192  |
| 6                                                                 | 2.887872  | -0.414276 | -0.655169 |
| 6                                                                 | 4.150050  | 0.153898  | -1.079274 |
| 6                                                                 | 1.611418  | -0.960874 | -0.368551 |
| 16                                                                |           |           |           |
| 227.514447 Kcal/mol 9.865973 eV -101.021113 H Original3D_13_6.log |           |           |           |
| 6                                                                 | -0.553405 | 1.199939  | -1.227229 |
| 6                                                                 | 0.282894  | 2.048026  | -0.582975 |
| 12                                                                | -3.570741 | 0.095133  | -1.047560 |
| 8                                                                 | 0.930137  | -0.304039 | 0.826869  |
| 6                                                                 | -1.376846 | 0.169367  | -1.298310 |
| 12                                                                | 2.218825  | 0.968912  | -0.138325 |
| 6                                                                 | 4.356728  | 1.064772  | 0.074465  |
| 6                                                                 | -1.429350 | 0.288064  | 1.554336  |
| 6                                                                 | -1.361986 | -0.608813 | -0.063031 |
| 6                                                                 | -1.125968 | 1.667542  | 1.557634  |
| 6                                                                 | -0.287995 | -0.519841 | 0.933184  |
| 8                                                                 | 0.440013  | -3.620488 | -0.098507 |
| 6                                                                 | -2.510892 | -0.315714 | 0.796889  |
| 6                                                                 | 4.135214  | 0.379046  | -0.981280 |
| 6                                                                 | -0.476154 | 2.182716  | 0.602118  |
| 6                                                                 | 1.224724  | -4.450491 | 0.034818  |
| 16                                                                |           |           |           |
| 227.740187 Kcal/mol 9.875762 eV -101.020753 H Original2D_0_9.log  |           |           |           |
| 6                                                                 | -1.496679 | -1.334948 | 0.000000  |
| 6                                                                 | -2.006379 | -2.675696 | 0.000000  |
| 6                                                                 | -1.113982 | -3.832559 | 0.000000  |
| 6                                                                 | 0.800558  | -2.245534 | 0.000000  |
| 6                                                                 | 0.000000  | -1.061034 | 0.000000  |
| 12                                                                | 1.047551  | 0.851335  | 0.000000  |
| 6                                                                 | -1.896728 | 4.563323  | -0.000000 |
| 6                                                                 | 0.096525  | -3.389806 | 0.000000  |
| 12                                                                | 2.794998  | -1.314332 | 0.000000  |
| 8                                                                 | 3.101301  | 3.176979  | -0.000000 |
| 6                                                                 | 4.047572  | 3.831865  | -0.000000 |
| 6                                                                 | -2.327647 | -0.287238 | -0.000000 |
| 6                                                                 | -0.251825 | 2.546693  | -0.000000 |
| 6                                                                 | -1.028277 | 3.567285  | -0.000000 |
| 6                                                                 | -2.639393 | -3.896060 | 0.000000  |
| 8                                                                 | -3.002934 | 0.677800  | -0.000000 |
| 16                                                                |           |           |           |
| 228.489896 Kcal/mol 9.908272 eV -101.019558 H MutI_4_77.log       |           |           |           |
| 8                                                                 | 4.805765  | 1.139188  | 1.005605  |
| 6                                                                 | -3.085015 | -2.391804 | 0.111206  |
| 6                                                                 | 1.361653  | -1.780573 | -0.449719 |
| 6                                                                 | -1.314773 | 2.429151  | -0.495921 |
| 6                                                                 | 0.517588  | -0.769089 | 0.060031  |
| 6                                                                 | 3.685414  | -0.628925 | -0.284667 |

|                                                               |           |           |           |
|---------------------------------------------------------------|-----------|-----------|-----------|
| 12                                                            | -2.955587 | -0.225026 | 0.586134  |
| 8                                                             | -3.583728 | 1.668069  | 0.213012  |
| 12                                                            | -0.957704 | -2.546179 | -0.294744 |
| 6                                                             | -0.777295 | -0.428672 | 0.677343  |
| 6                                                             | 2.604526  | -1.295139 | -0.538399 |
| 6                                                             | 1.267763  | 1.885765  | -0.995970 |
| 6                                                             | -0.012750 | 1.855755  | -0.546427 |
| 6                                                             | -2.458733 | 2.107062  | -0.166287 |
| 6                                                             | 0.081983  | 0.531736  | 0.059135  |
| 6                                                             | 4.326839  | 0.284133  | 0.362072  |
| 16                                                            |           |           |           |
| 228.609500 Kcal/mol 9.913459 eV -101.019368 H MutI_15_43.log  |           |           |           |
| 8                                                             | -0.158784 | -2.645933 | 0.367029  |
| 6                                                             | 4.383645  | 0.769896  | -0.393613 |
| 6                                                             | -2.670148 | 0.429842  | -0.283747 |
| 6                                                             | -1.500665 | 0.737099  | 0.127428  |
| 6                                                             | 0.242870  | -1.245406 | 0.454563  |
| 6                                                             | 0.524510  | 2.419289  | 0.338168  |
| 6                                                             | 3.605614  | -1.602450 | -0.105049 |
| 12                                                            | -1.852913 | 2.725676  | 0.309940  |
| 8                                                             | 4.287314  | 1.976616  | -0.601856 |
| 12                                                            | -5.518045 | -1.158275 | -0.567426 |
| 6                                                             | 4.311681  | -0.519793 | -0.266149 |
| 6                                                             | -0.226848 | 0.027506  | 0.377960  |
| 6                                                             | 1.286113  | -2.105542 | 0.292128  |
| 6                                                             | 2.560118  | -2.439132 | 0.041230  |
| 6                                                             | 0.606664  | 1.190270  | 0.302559  |
| 6                                                             | -3.886344 | 0.096042  | -0.057404 |
| 16                                                            |           |           |           |
| 228.835573 Kcal/mol 9.923262 eV -101.019008 H Child_5_60.log  |           |           |           |
| 6                                                             | 5.991164  | 1.140092  | -0.172108 |
| 8                                                             | -7.010077 | 0.477495  | 0.031986  |
| 6                                                             | 4.877156  | 1.819223  | -0.184206 |
| 6                                                             | -5.807004 | 0.599835  | -0.013767 |
| 12                                                            | 3.226580  | 0.650928  | -0.127800 |
| 6                                                             | 0.045316  | -3.572408 | -0.318315 |
| 6                                                             | 1.666900  | -0.339323 | -1.369674 |
| 6                                                             | 0.587787  | -2.347724 | -0.132929 |
| 6                                                             | 1.163919  | -1.424605 | -1.104465 |
| 6                                                             | 0.636445  | -1.731382 | 1.195271  |
| 6                                                             | -2.001590 | 0.883417  | -0.216396 |
| 6                                                             | -4.555670 | 0.709873  | -0.076436 |
| 6                                                             | -3.219931 | 0.814239  | -0.142447 |
| 6                                                             | 1.141245  | -0.659686 | 1.466767  |
| 8                                                             | 1.704001  | 0.535746  | 1.312591  |
| 12                                                            | 0.047936  | 0.727802  | -0.234232 |
| 16                                                            |           |           |           |
| 229.079145 Kcal/mol 9.933824 eV -101.018619 H Child_17_18.log |           |           |           |
| 6                                                             | -4.331263 | 3.438207  | -0.119894 |
| 6                                                             | 5.063881  | 1.863030  | -0.127704 |
| 6                                                             | -3.510277 | 2.451495  | -0.060358 |
| 6                                                             | 4.016601  | 1.647365  | 0.719192  |
| 6                                                             | -2.633691 | 1.442193  | -0.009584 |
| 6                                                             | -0.190006 | -2.336466 | 0.097509  |
| 8                                                             | -3.205771 | 0.116450  | 0.054050  |

|                                                                   |           |           |           |
|-------------------------------------------------------------------|-----------|-----------|-----------|
| 6                                                                 | 0.933534  | -1.729945 | 0.168076  |
| 6                                                                 | -2.372231 | -0.913164 | 0.087916  |
| 8                                                                 | 1.990190  | -1.110530 | 0.206009  |
| 6                                                                 | -1.233696 | 1.487038  | -0.007353 |
| 6                                                                 | -1.435237 | -1.685037 | 0.094813  |
| 6                                                                 | 0.004015  | 1.408945  | 0.002359  |
| 6                                                                 | 3.995091  | 1.444957  | -0.864318 |
| 12                                                                | 2.051128  | 0.919515  | 0.042349  |
| 12                                                                | -0.394100 | -4.516104 | -0.206048 |
| 16                                                                |           |           |           |
| 229.530858 Kcal/mol 9.953413 eV -101.017900 H MutI_17_39.log      |           |           |           |
| 6                                                                 | 3.511594  | 1.389147  | -0.070495 |
| 6                                                                 | -4.617566 | 1.844049  | -0.293401 |
| 6                                                                 | 2.368942  | 1.990342  | -0.036550 |
| 6                                                                 | -1.587558 | -1.144231 | 0.013668  |
| 8                                                                 | 3.302835  | -1.130189 | 0.131390  |
| 6                                                                 | 1.092749  | 2.224559  | 0.013569  |
| 6                                                                 | 4.910108  | 0.905276  | -0.234974 |
| 12                                                                | 1.613816  | -1.990246 | 0.209990  |
| 12                                                                | -2.916387 | 0.554778  | 0.009736  |
| 6                                                                 | -2.148675 | -3.846472 | -0.320576 |
| 6                                                                 | 3.917212  | -0.019030 | -0.004996 |
| 6                                                                 | -0.415005 | -1.782033 | 0.057268  |
| 6                                                                 | -0.159443 | 2.071931  | 0.045970  |
| 6                                                                 | -1.659341 | -2.652633 | -0.146355 |
| 8                                                                 | -1.356793 | 1.860103  | -0.010939 |
| 6                                                                 | -5.202598 | 0.916813  | 0.376818  |
| 16                                                                |           |           |           |
| 229.576009 Kcal/mol 9.955371 eV -101.017828 H Child_13_24.log     |           |           |           |
| 6                                                                 | 3.479447  | 4.195216  | -1.256282 |
| 8                                                                 | -5.107320 | 1.794753  | 1.381502  |
| 12                                                                | 5.603713  | -1.461400 | -0.320508 |
| 6                                                                 | -4.339807 | 1.041889  | 0.880976  |
| 6                                                                 | 2.409824  | 3.542938  | -0.940815 |
| 6                                                                 | -3.341837 | 0.368541  | 0.328604  |
| 6                                                                 | 4.430966  | -1.861741 | 1.190639  |
| 6                                                                 | -2.998328 | -1.983142 | -0.747818 |
| 6                                                                 | 1.298432  | 2.872474  | -0.641037 |
| 6                                                                 | -2.784855 | -3.140714 | -1.338652 |
| 6                                                                 | 3.142739  | -1.739154 | 1.359726  |
| 6                                                                 | -3.201394 | -0.869579 | -0.201813 |
| 6                                                                 | 0.252062  | 2.228024  | -0.366756 |
| 6                                                                 | -2.596951 | -4.268569 | -1.958231 |
| 12                                                                | -1.395327 | 1.214553  | 0.103994  |
| 8                                                                 | 1.982018  | -1.714119 | 1.711861  |
| 16                                                                |           |           |           |
| 229.727662 Kcal/mol 9.961947 eV -101.017586 H Original2D_15_1.log |           |           |           |
| 6                                                                 | -1.244726 | -0.303806 | 0.000000  |
| 6                                                                 | -0.740235 | -2.260009 | -0.000000 |
| 6                                                                 | -1.448351 | 1.050872  | 0.000000  |
| 6                                                                 | -2.001653 | -1.692488 | 0.000000  |
| 6                                                                 | -0.000000 | -0.983770 | -0.000000 |
| 6                                                                 | 2.459604  | -0.121573 | -0.000000 |
| 12                                                                | 3.682302  | 1.441159  | -0.000000 |
| 8                                                                 | -0.738310 | -3.627661 | -0.000000 |

|                                                |           |           |           |
|------------------------------------------------|-----------|-----------|-----------|
| 8                                              | -0.650337 | 3.425975  | 0.000000  |
| 6                                              | -2.143207 | -3.864882 | -0.000000 |
| 12                                             | 1.229186  | 3.729039  | 0.000000  |
| 6                                              | -2.937373 | -2.736849 | 0.000000  |
| 6                                              | 3.328685  | 3.524556  | 0.000000  |
| 6                                              | -3.438903 | -4.355302 | -0.000000 |
| 6                                              | 1.306880  | -0.567570 | -0.000000 |
| 6                                              | -1.112166 | 2.239340  | 0.000000  |
| 16                                             |           |           |           |
| 230.643059 Kcal/mol 10.001642 eV -101.016127 H |           |           |           |
| Original3D_15_5.log                            |           |           |           |
| 6                                              | -0.805983 | 0.280628  | -0.857273 |
| 6                                              | 0.657429  | -1.402360 | 0.313581  |
| 6                                              | 2.837760  | -0.438333 | -0.521810 |
| 12                                             | -1.095283 | -2.200670 | 1.138723  |
| 6                                              | -2.743944 | -1.172674 | 0.396137  |
| 6                                              | 1.743634  | 0.194114  | -1.047134 |
| 12                                             | -4.194745 | 0.294670  | -0.003460 |
| 6                                              | 1.237937  | 2.213430  | 1.610372  |
| 6                                              | 4.168276  | -0.584306 | -0.626471 |
| 6                                              | -1.327937 | 1.520173  | -1.349455 |
| 6                                              | -2.016092 | -0.292867 | -0.279237 |
| 8                                              | 1.950407  | 3.070727  | 1.339558  |
| 6                                              | 1.955155  | -1.121714 | 0.617214  |
| 8                                              | -2.718320 | 1.154273  | -0.798477 |
| 6                                              | 0.454698  | -0.308707 | -0.688135 |
| 6                                              | 5.443009  | -0.708719 | -0.559757 |
| 16                                             |           |           |           |
| 231.426900 Kcal/mol 10.035633 eV -101.014878 H |           |           |           |
| Original3D_8_6.log                             |           |           |           |
| 6                                              | -0.095172 | -1.520503 | -0.106915 |
| 12                                             | -1.546078 | -0.136772 | 0.803263  |
| 6                                              | 0.190932  | 1.917422  | 0.035583  |
| 6                                              | 1.316362  | -1.935843 | -0.254697 |
| 6                                              | 1.115383  | 0.782938  | 0.103013  |
| 8                                              | 3.360848  | -3.273030 | -0.666986 |
| 6                                              | 0.902993  | -0.545188 | -0.121056 |
| 6                                              | 2.351830  | -2.694976 | -0.424415 |
| 6                                              | -5.033745 | -2.504994 | 0.445229  |
| 6                                              | 2.264933  | 1.645359  | 0.122551  |
| 8                                              | -5.400354 | -1.465010 | 0.067645  |
| 6                                              | 1.376887  | 2.814188  | -0.333882 |
| 12                                             | -2.728242 | 2.377438  | -0.906898 |
| 6                                              | -1.148757 | 2.085671  | 0.324003  |
| 6                                              | 3.532144  | 1.253860  | 0.365533  |
| 6                                              | 4.494193  | 0.538122  | 0.851442  |
| 16                                             |           |           |           |
| 231.601180 Kcal/mol 10.043190 eV -101.014600 H |           |           |           |
| Original3D_0_62.log                            |           |           |           |
| 12                                             | 1.070064  | 1.068409  | 2.043720  |
| 6                                              | -1.243224 | -0.430860 | -1.412823 |
| 6                                              | 1.416242  | 2.256892  | -1.414412 |
| 8                                              | -2.478258 | 1.465589  | -0.273878 |
| 6                                              | -1.985866 | 0.426731  | -0.970518 |
| 12                                             | 2.352393  | -2.184043 | -0.432251 |

|            |           |           |           |                               |
|------------|-----------|-----------|-----------|-------------------------------|
| 6          | 0.458050  | 3.108689  | -1.145256 |                               |
| 6          | 0.733882  | -2.088814 | -1.664746 |                               |
| 6          | 2.896640  | -1.531488 | 1.398069  |                               |
| 6          | -3.068015 | -2.622938 | 0.823972  |                               |
| 6          | -0.254380 | -1.349000 | -1.660336 |                               |
| 6          | 2.317007  | 1.366901  | -1.688812 |                               |
| 6          | -0.632988 | 2.002332  | 1.441613  |                               |
| 6          | -1.607591 | 1.837129  | 0.687937  |                               |
| 6          | 2.374556  | -0.468806 | 1.807854  |                               |
| 8          | -3.708661 | -1.672214 | 0.704767  |                               |
| 16         |           |           |           |                               |
| 231.763446 | Kcal/mol  | 10.050227 | eV        | -101.014342 H Child_11_30.log |
| 6          | 0.913636  | 2.717574  | -0.483699 |                               |
| 6          | -3.346343 | -1.695052 | -0.261636 |                               |
| 8          | 0.963769  | 3.780509  | -0.984185 |                               |
| 6          | -2.032577 | -2.176508 | -0.564095 |                               |
| 6          | 0.653649  | 1.510243  | 0.016083  |                               |
| 8          | -2.981252 | -0.330752 | -0.132181 |                               |
| 6          | 2.868260  | 0.198947  | 0.369456  |                               |
| 6          | -0.783928 | -2.271943 | -0.569899 |                               |
| 6          | 1.378702  | 0.347917  | 0.230916  |                               |
| 6          | -3.469397 | 0.763004  | 0.561007  |                               |
| 12         | -1.100650 | 0.307668  | -0.022631 |                               |
| 6          | 3.321507  | -2.397559 | 0.162460  |                               |
| 12         | 1.218591  | -2.099037 | -0.031808 |                               |
| 6          | 3.492781  | 1.319096  | 0.754662  |                               |
| 6          | 3.295896  | -1.151199 | 0.200033  |                               |
| 6          | -3.838090 | 1.818541  | 1.182079  |                               |
| 16         |           |           |           |                               |
| 232.655005 | Kcal/mol  | 10.088889 | eV        | -101.012921 H Child_17_20.log |
| 6          | -1.442604 | 1.612841  | -1.038061 |                               |
| 12         | 3.490472  | -1.482183 | -0.299347 |                               |
| 6          | -0.706399 | 1.804838  | -2.087445 |                               |
| 6          | 1.704909  | -2.428857 | -0.306599 |                               |
| 12         | -2.265829 | 0.975785  | 0.834656  |                               |
| 6          | 0.470892  | -2.328485 | -0.238173 |                               |
| 6          | -0.438241 | 1.775232  | 1.422166  |                               |
| 6          | 4.134981  | 0.346651  | 0.398667  |                               |
| 6          | 0.830137  | 1.849002  | 1.266532  |                               |
| 6          | -0.863402 | -2.122572 | -0.122982 |                               |
| 6          | -0.070004 | 1.976706  | -3.239580 |                               |
| 6          | 3.176004  | 1.125746  | 0.725755  |                               |
| 6          | 2.122200  | 1.773597  | 1.181272  |                               |
| 6          | -2.043883 | -1.806050 | -0.059266 |                               |
| 8          | -3.320811 | -1.557020 | -0.077125 |                               |
| 8          | -3.672097 | -0.367370 | 0.847446  |                               |
| 16         |           |           |           |                               |
| 233.913385 | Kcal/mol  | 10.143457 | eV        | -101.010916 H Child_2_40.log  |
| 6          | 5.253735  | 1.099061  | 1.113308  |                               |
| 8          | -0.576645 | -3.126287 | -1.470905 |                               |
| 6          | 4.190900  | 1.627645  | 0.496752  |                               |
| 6          | -0.141887 | -2.070540 | -1.420385 |                               |
| 6          | 5.290349  | -0.273405 | 1.136273  |                               |
| 12         | 0.309746  | 0.231134  | -1.061104 |                               |
| 6          | 3.110939  | 1.346081  | -0.124902 |                               |

|            |           |           |           |                               |
|------------|-----------|-----------|-----------|-------------------------------|
| 6          | -4.013203 | -1.755374 | 2.673473  |                               |
| 6          | 4.369225  | -0.963588 | 0.482044  |                               |
| 6          | -4.299878 | 0.180990  | 0.926795  |                               |
| 6          | 2.376204  | 0.192787  | -0.527259 |                               |
| 6          | -4.228710 | -0.805736 | 1.828450  |                               |
| 6          | 3.253044  | -0.874447 | -0.141175 |                               |
| 6          | -4.567647 | 1.030399  | 0.028889  |                               |
| 12         | -2.378492 | 1.234794  | -0.591825 |                               |
| 8          | -4.265040 | 1.876990  | -0.903897 |                               |
| 16         |           |           |           |                               |
| 234.058592 | Kcal/mol  | 10.149754 | eV        | -101.010684 H MutD_9_78.log   |
| 6          | -2.013273 | -2.370352 | 0.085521  |                               |
| 6          | -3.688368 | -0.584974 | 0.133924  |                               |
| 6          | -3.157712 | -1.793356 | 0.171162  |                               |
| 6          | -1.749631 | 1.750645  | -0.180787 |                               |
| 6          | -2.848831 | 2.614630  | -0.072163 |                               |
| 6          | -0.646458 | 1.189486  | -0.279805 |                               |
| 6          | -0.787284 | -2.807252 | -0.028361 |                               |
| 8          | 3.851331  | 1.793231  | 0.135280  |                               |
| 6          | 3.255663  | 0.568655  | 0.005076  |                               |
| 6          | 1.687289  | -2.053823 | -0.117782 |                               |
| 12         | 3.631913  | -1.390997 | 0.138401  |                               |
| 12         | 1.220568  | 0.212925  | -0.321025 |                               |
| 6          | -4.211393 | 0.555251  | 0.164770  |                               |
| 6          | 0.504044  | -2.513375 | -0.087753 |                               |
| 8          | -4.119914 | 1.889708  | 0.106742  |                               |
| 6          | 4.309103  | 2.890024  | 0.248750  |                               |
| 16         |           |           |           |                               |
| 234.412268 | Kcal/mol  | 10.165091 | eV        | -101.010121 H Child_11_47.log |
| 8          | -5.429060 | 0.114252  | 0.431704  |                               |
| 12         | 1.316851  | 3.316941  | 0.034627  |                               |
| 6          | -3.773870 | -1.705482 | -0.297368 |                               |
| 6          | 4.877240  | -0.844506 | 0.199149  |                               |
| 6          | -4.960110 | -1.132510 | 0.021763  |                               |
| 6          | 6.067802  | -1.329999 | 0.317100  |                               |
| 6          | -4.339542 | 0.921029  | 0.542981  |                               |
| 8          | 7.167137  | -1.743822 | 0.441608  |                               |
| 12         | -2.127503 | -0.381834 | -0.048314 |                               |
| 6          | 3.768751  | -0.277066 | -0.027576 |                               |
| 6          | -5.090626 | -2.453595 | -0.436066 |                               |
| 6          | 2.663740  | 0.366072  | -0.374094 |                               |
| 6          | 1.219626  | 0.158420  | -0.427212 |                               |
| 6          | -3.171558 | 1.365082  | 0.529964  |                               |
| 6          | 0.023703  | -0.242937 | -0.266022 |                               |
| 6          | 2.018711  | 1.478037  | -0.919662 |                               |
| 16         |           |           |           |                               |
| 234.820620 | Kcal/mol  | 10.182799 | eV        | -101.009470 H MutD_1_76.log   |
| 6          | -0.125509 | -0.164771 | 2.025597  |                               |
| 6          | 1.142189  | -0.063784 | 1.388631  |                               |
| 8          | 1.270837  | 1.446347  | 1.120957  |                               |
| 12         | -3.255268 | -0.232566 | 0.660085  |                               |
| 6          | 1.343404  | -1.634004 | -0.665375 |                               |
| 6          | -0.873254 | -0.384413 | -0.074184 |                               |
| 6          | -1.311101 | 0.747616  | -1.102961 |                               |
| 8          | -1.979925 | -1.205519 | -0.646572 |                               |

|                                                |           |           |           |                |
|------------------------------------------------|-----------|-----------|-----------|----------------|
| 6                                              | -0.400767 | 1.743112  | -1.360377 |                |
| 6                                              | 0.779994  | 2.001561  | -1.012219 |                |
| 6                                              | -2.520919 | 0.132497  | -1.410758 |                |
| 6                                              | 0.557208  | -0.755145 | 0.042669  |                |
| 6                                              | 2.403985  | -2.223409 | -1.069321 |                |
| 12                                             | 2.998819  | -0.295556 | 0.037277  |                |
| 6                                              | -1.303595 | -0.128388 | 1.428529  |                |
| 6                                              | 1.766714  | 1.464269  | -0.217469 |                |
| 16                                             |           |           |           |                |
| 235.025628 Kcal/mol 10.191689 eV -101.009143 H |           |           |           | MutD_13_48.log |
| 12                                             | 5.017184  | 1.015655  | -0.058143 |                |
| 6                                              | -5.897762 | -2.774606 | -0.043095 |                |
| 6                                              | -4.601597 | 3.389092  | -0.070481 |                |
| 8                                              | -4.431486 | -0.589672 | 0.076860  |                |
| 8                                              | -3.711998 | 2.673900  | -0.200084 |                |
| 6                                              | 0.577229  | 0.177196  | 0.074557  |                |
| 6                                              | 4.188267  | -0.966705 | -0.084744 |                |
| 6                                              | 3.469807  | 2.471186  | 0.129170  |                |
| 6                                              | -3.164849 | -0.472016 | 0.079494  |                |
| 6                                              | 1.929024  | 0.316203  | 0.066323  |                |
| 6                                              | 2.599104  | 1.557115  | 0.119388  |                |
| 6                                              | 2.790184  | -0.885909 | -0.012909 |                |
| 6                                              | -1.955712 | -0.224464 | 0.093312  |                |
| 12                                             | 3.353058  | -2.823632 | -0.080207 |                |
| 6                                              | -5.161406 | -1.738168 | 0.008620  |                |
| 6                                              | -0.654794 | -0.011941 | 0.081363  |                |
| 16                                             |           |           |           |                |
| 236.103256 Kcal/mol 10.238419 eV -101.007426 H |           |           |           | Child_8_12.log |
| 6                                              | 2.911524  | -2.342845 | -0.490582 |                |
| 6                                              | -0.553027 | 2.370038  | -0.062181 |                |
| 8                                              | 4.218131  | -1.804626 | -0.141130 |                |
| 6                                              | 0.742513  | 2.566284  | 0.178083  |                |
| 6                                              | 1.871382  | -1.415189 | -0.415693 |                |
| 6                                              | -1.735609 | 2.013206  | -0.269806 |                |
| 6                                              | 0.730549  | -0.927883 | -0.386527 |                |
| 6                                              | -4.323228 | -2.821587 | 0.803679  |                |
| 6                                              | 4.500902  | -0.535605 | 0.242175  |                |
| 6                                              | 1.938234  | 2.224615  | 0.397642  |                |
| 12                                             | -1.260615 | -0.260639 | -0.217738 |                |
| 8                                              | -3.926794 | -1.772993 | 0.373976  |                |
| 6                                              | 3.115701  | 1.646528  | 0.511569  |                |
| 6                                              | 3.691811  | 0.491687  | 0.358146  |                |
| 12                                             | -3.725541 | 1.315337  | -0.360897 |                |
| 6                                              | -3.306889 | -0.608489 | -0.019697 |                |
| 16                                             |           |           |           |                |
| 236.144590 Kcal/mol 10.240212 eV -101.007360 H |           |           |           |                |
| Original3D_0_50.log                            |           |           |           |                |
| 8                                              | 0.923282  | -1.870530 | 1.549945  |                |
| 6                                              | -1.559066 | -0.764092 | -0.515934 |                |
| 6                                              | 1.087742  | -2.944768 | 1.142162  |                |
| 6                                              | 0.757853  | 0.729261  | -0.746403 |                |
| 6                                              | -0.432326 | 0.090413  | -0.311784 |                |
| 6                                              | -2.713173 | -0.119446 | 0.035515  |                |
| 6                                              | -1.386837 | -3.172349 | -1.600680 |                |
| 8                                              | 1.002437  | 1.260679  | -2.093132 |                |

|                                                |           |           |           |                 |
|------------------------------------------------|-----------|-----------|-----------|-----------------|
| 6                                              | 2.312983  | 0.455448  | -0.653518 |                 |
| 6                                              | 3.072155  | 0.302788  | 0.409104  |                 |
| 6                                              | -0.098100 | 1.261766  | 0.421774  |                 |
| 6                                              | 2.368480  | 0.942065  | -2.090938 |                 |
| 12                                             | 1.463420  | 0.482416  | 1.883475  |                 |
| 6                                              | -3.462447 | 0.728367  | 0.578835  |                 |
| 6                                              | -1.489753 | -1.989230 | -1.107269 |                 |
| 12                                             | -1.975988 | 2.164039  | 0.698218  |                 |
| 16                                             |           |           |           |                 |
| 236.228075 Kcal/mol 10.243832 eV -101.007227 H |           |           |           | Child_12_25.log |
| 12                                             | -3.630092 | -2.804301 | -0.159120 |                 |
| 6                                              | 6.415581  | -2.294499 | 0.343545  |                 |
| 6                                              | -4.234103 | -0.874920 | 0.068197  |                 |
| 6                                              | 5.413889  | -1.529613 | 0.139346  |                 |
| 12                                             | -4.907709 | 1.151260  | 0.287033  |                 |
| 6                                              | 4.128368  | 3.468966  | -0.110980 |                 |
| 6                                              | -2.841648 | -0.938841 | -0.088080 |                 |
| 8                                              | 3.374535  | 2.602101  | -0.084406 |                 |
| 6                                              | -1.885073 | 0.192623  | -0.091310 |                 |
| 6                                              | -3.252615 | 2.465895  | 0.034503  |                 |
| 6                                              | 3.209115  | -0.619940 | -0.062673 |                 |
| 6                                              | -2.455767 | 1.477603  | -0.066686 |                 |
| 6                                              | 1.983030  | -0.467876 | -0.076493 |                 |
| 6                                              | -0.545526 | -0.026874 | -0.089969 |                 |
| 6                                              | 0.681488  | -0.263028 | -0.078635 |                 |
| 8                                              | 4.469612  | -0.564661 | -0.048037 |                 |
| 16                                             |           |           |           |                 |
| 236.813979 Kcal/mol 10.269239 eV -101.006293 H |           |           |           | MutI_15_33.log  |
| 12                                             | 2.572123  | 1.800300  | -0.022783 |                 |
| 12                                             | 5.911850  | -0.724838 | 0.142912  |                 |
| 6                                              | 2.685390  | -0.765387 | 0.006845  |                 |
| 6                                              | 3.690536  | 0.022347  | 0.031146  |                 |
| 8                                              | -0.053241 | 1.574482  | -0.036049 |                 |
| 6                                              | -6.105893 | 0.707270  | 0.223713  |                 |
| 6                                              | -1.328255 | 1.255701  | -0.040739 |                 |
| 6                                              | -2.436039 | 0.752365  | 0.010581  |                 |
| 6                                              | 1.582924  | -1.526437 | -0.037141 |                 |
| 6                                              | 0.430002  | -1.977965 | -0.070783 |                 |
| 6                                              | -0.911511 | -2.054164 | -0.081262 |                 |
| 8                                              | -3.362646 | -1.456161 | -0.101997 |                 |
| 6                                              | 0.572104  | 2.861676  | -0.194806 |                 |
| 6                                              | -4.869615 | 0.352231  | 0.161628  |                 |
| 6                                              | -3.596770 | -0.026806 | 0.036353  |                 |
| 6                                              | -2.126303 | -1.909517 | -0.101732 |                 |
| 16                                             |           |           |           |                 |
| 237.189355 Kcal/mol 10.285517 eV -101.005695 H |           |           |           | MutI_16_43.log  |
| 6                                              | -3.361714 | -0.134629 | 0.859929  |                 |
| 8                                              | -3.144936 | 0.992352  | -0.013275 |                 |
| 6                                              | 1.797861  | 1.259170  | -0.613683 |                 |
| 6                                              | 3.907638  | -0.157164 | -0.033209 |                 |
| 12                                             | 1.082747  | 2.922706  | 0.737647  |                 |
| 6                                              | -4.231329 | -0.784962 | 0.026324  |                 |
| 6                                              | 2.902961  | 0.543313  | -0.385245 |                 |
| 6                                              | 4.872331  | -0.930001 | 0.341861  |                 |
| 6                                              | 5.747079  | -1.826818 | 0.711679  |                 |



|    |           |           |           |
|----|-----------|-----------|-----------|
| 6  | -2.455140 | -0.339464 | 1.871039  |
| 6  | -1.433231 | -0.450264 | 2.623551  |
| 6  | 0.723616  | 0.944870  | -1.413050 |
| 6  | -1.140717 | -1.934617 | -0.523672 |
| 12 | -2.272804 | -0.126671 | -1.304554 |
| 8  | -0.302807 | -2.691597 | -0.322444 |
| 6  | -0.352251 | 0.484157  | -1.884086 |

16

239.302119 Kcal/mol 10.377135 eV -101.002328 H

Original3D\_0\_44.log

|    |           |           |           |
|----|-----------|-----------|-----------|
| 6  | -1.212301 | -0.334724 | -0.604822 |
| 6  | 1.629932  | 0.683341  | 0.735851  |
| 6  | -2.448817 | -0.856450 | -0.767332 |
| 6  | 1.950874  | -1.732371 | 1.195656  |
| 6  | 1.128372  | 0.293569  | -0.690805 |
| 6  | -1.325759 | 1.014103  | 0.174718  |
| 6  | 0.361087  | -2.378511 | -0.584450 |
| 6  | -3.600736 | -0.631278 | -0.228368 |
| 6  | 0.131891  | -0.728565 | -0.767574 |
| 12 | 0.382534  | 2.304770  | -0.750040 |
| 6  | 1.099797  | -2.438808 | 0.479796  |
| 6  | 2.432061  | -0.533404 | 1.237805  |
| 8  | -2.153618 | 1.317734  | 1.005258  |
| 12 | 3.462543  | -0.001328 | -0.804514 |
| 6  | 1.295807  | 1.915041  | 1.219830  |
| 8  | -4.695654 | -0.476856 | 0.276345  |

16

241.093203 Kcal/mol 10.454804 eV -100.999474 H

Original3D\_0\_52.log

|    |           |           |           |
|----|-----------|-----------|-----------|
| 12 | 0.414406  | -0.911826 | -0.107918 |
| 6  | -0.856627 | 0.538563  | 1.064238  |
| 12 | -2.790035 | -0.558809 | 0.953601  |
| 8  | -1.300653 | -3.369969 | -0.098991 |
| 6  | -1.880258 | 1.292130  | 0.426609  |
| 6  | 2.515802  | -0.829777 | 0.030009  |
| 6  | 2.631470  | 0.228932  | 0.861179  |
| 6  | 1.656861  | 1.014559  | 1.496736  |
| 6  | -2.139534 | 2.537016  | 0.050223  |
| 6  | -2.436778 | -3.369696 | -0.346167 |
| 6  | 3.864840  | -0.142111 | 0.158173  |
| 6  | 0.070335  | 0.100480  | -2.173933 |
| 6  | 5.103954  | 0.148462  | -0.165089 |
| 6  | 0.407751  | 1.031339  | 1.461039  |
| 8  | -0.063013 | 0.858109  | -3.022408 |
| 6  | -2.368340 | 3.740519  | -0.392520 |

16

242.014036 Kcal/mol 10.494735 eV -100.998006 H

Child\_1\_54.log

|   |           |           |           |
|---|-----------|-----------|-----------|
| 6 | -4.983170 | -0.092092 | -0.047660 |
| 6 | 5.518583  | 1.161460  | -1.079559 |
| 6 | 2.156258  | 1.908410  | 1.444388  |
| 6 | 4.541302  | 0.321962  | -0.832302 |
| 6 | -3.800444 | -0.593143 | -0.052772 |
| 6 | 3.608838  | -0.524319 | -0.572527 |
| 6 | 0.816875  | 1.457791  | 1.227355  |
| 8 | -2.850617 | 2.622025  | -1.517503 |

|            |                     |           |           |                               |
|------------|---------------------|-----------|-----------|-------------------------------|
| 6          | 1.921128            | 0.611306  | 0.884369  |                               |
| 6          | -2.519426           | 2.081758  | -0.566828 |                               |
| 6          | -2.542461           | -1.011283 | 0.003991  |                               |
| 6          | -0.183555           | -2.203096 | -0.065468 |                               |
| 12         | -1.144245           | 0.888803  | 0.869544  |                               |
| 12         | 1.785881            | -1.365264 | 0.090124  |                               |
| 6          | -1.281017           | -1.165190 | 0.153610  |                               |
| 8          | -0.551520           | -3.372507 | -0.294447 |                               |
| 16         |                     |           |           |                               |
| 242.421959 | Kcal/mol            | 10.512424 | eV        | -100.997356 H Child_13_16.log |
| 6          | 5.561353            | -0.194741 | 1.241322  |                               |
| 8          | -3.144331           | 1.195700  | 1.793535  |                               |
| 6          | 4.560430            | 0.021025  | 2.019976  |                               |
| 8          | -3.188547           | 1.391646  | 0.103883  |                               |
| 12         | 3.770963            | 0.145105  | 0.086924  |                               |
| 12         | -3.069468           | -0.550544 | 0.976080  |                               |
| 6          | 1.974822            | 0.247767  | -1.112527 |                               |
| 6          | -2.138700           | 1.953598  | -0.371173 |                               |
| 6          | 1.193242            | -0.876892 | -1.147559 |                               |
| 6          | -1.043620           | 2.318222  | -0.809004 |                               |
| 6          | -2.115672           | -2.187200 | 0.087127  |                               |
| 6          | 0.270034            | -1.680094 | -0.883444 |                               |
| 6          | 0.220817            | 2.083847  | -1.201897 |                               |
| 6          | 1.245342            | 1.399451  | -1.366688 |                               |
| 6          | -1.821459           | -3.416105 | -0.562780 |                               |
| 6          | -0.865744           | -2.307794 | -0.549251 |                               |
| 16         |                     |           |           |                               |
| 242.610555 | Kcal/mol            | 10.520603 | eV        | -100.997056 H                 |
|            | Original3D_14_4.log |           |           |                               |
| 6          | 1.877658            | -1.988105 | -0.736454 |                               |
| 6          | 3.063403            | -1.197869 | -0.399439 |                               |
| 6          | 2.718704            | -2.807226 | -1.582784 |                               |
| 12         | 3.295590            | 0.894584  | -0.248130 |                               |
| 6          | -1.734442           | -1.911890 | 1.086357  |                               |
| 6          | 3.651767            | -2.511957 | -0.370321 |                               |
| 6          | -2.775696           | -1.322822 | 0.380456  |                               |
| 6          | 2.766234            | 2.778260  | 0.110815  |                               |
| 6          | 2.194125            | 3.819092  | 0.555805  |                               |
| 6          | -3.647894           | -0.487849 | -0.079521 |                               |
| 6          | -4.543147           | 0.241229  | -0.620079 |                               |
| 8          | -1.911418           | -2.335294 | 2.286439  |                               |
| 12         | -4.934139           | 2.198420  | -1.231790 |                               |
| 6          | -0.508819           | -2.044554 | 0.397018  |                               |
| 6          | 0.586349            | -2.058963 | -0.160663 |                               |
| 8          | 1.633059            | 4.815280  | 0.997547  |                               |
| 16         |                     |           |           |                               |
| 243.301551 | Kcal/mol            | 10.550567 | eV        | -100.995955 H MutI_13_55.log  |
| 6          | -2.554303           | -2.348648 | 0.010432  |                               |
| 6          | -1.117620           | 2.105616  | 0.201469  |                               |
| 6          | -1.234953           | -2.296891 | 0.124681  |                               |
| 6          | 4.980910            | 0.250835  | -0.071491 |                               |
| 6          | 6.144538            | -0.210441 | -0.159432 |                               |
| 8          | -2.286245           | 2.750292  | 0.098650  |                               |
| 6          | 7.419492            | -0.533512 | -0.263515 |                               |
| 6          | -4.429151           | 1.316633  | -0.043439 |                               |

|    |           |           |           |
|----|-----------|-----------|-----------|
| 6  | 0.014041  | -2.124084 | 0.285363  |
| 12 | -4.667603 | -0.691502 | -0.255389 |
| 8  | 3.786863  | 0.344549  | 0.142369  |
| 6  | -3.817618 | -2.459887 | -0.185370 |
| 12 | 2.007010  | 1.059957  | -0.054578 |
| 6  | 1.335601  | -2.276082 | 0.361375  |
| 6  | -3.425068 | 2.056391  | 0.079716  |
| 6  | 0.004494  | 1.656706  | -0.041211 |

16

243.490572 Kcal/mol 10.558764 eV -100.995653 H

OriginalID\_7\_0.log

|    |          |          |            |
|----|----------|----------|------------|
| 6  | 0.000000 | 0.000000 | -0.832418  |
| 6  | 0.000000 | 0.000000 | 0.403145   |
| 6  | 0.000000 | 0.000000 | 1.737197   |
| 6  | 0.000000 | 0.000000 | -2.176129  |
| 6  | 0.000000 | 0.000000 | -3.418846  |
| 6  | 0.000000 | 0.000000 | 2.967370   |
| 12 | 0.000000 | 0.000000 | -5.463840  |
| 8  | 0.000000 | 0.000000 | 4.226035   |
| 6  | 0.000000 | 0.000000 | -7.449564  |
| 6  | 0.000000 | 0.000000 | 5.507262   |
| 6  | 0.000000 | 0.000000 | -8.707663  |
| 12 | 0.000000 | 0.000000 | 7.435161   |
| 6  | 0.000000 | 0.000000 | 9.521635   |
| 6  | 0.000000 | 0.000000 | -10.042450 |
| 6  | 0.000000 | 0.000000 | -11.330096 |
| 8  | 0.000000 | 0.000000 | 10.682403  |

16

243.751101 Kcal/mol 10.570061 eV -100.995238 H

Child\_10\_36.log

|    |           |           |           |
|----|-----------|-----------|-----------|
| 6  | -2.767993 | -3.089241 | 0.743279  |
| 6  | 5.612371  | 1.584894  | -0.834583 |
| 8  | -3.739699 | -0.929637 | -0.299032 |
| 6  | 4.421762  | 1.195335  | -0.618402 |
| 6  | -2.641875 | -1.873971 | 0.214764  |
| 6  | -3.576053 | 2.262811  | 0.802206  |
| 6  | -2.638000 | 0.012271  | -0.700479 |
| 6  | 3.445287  | 0.302844  | -0.229015 |
| 6  | -1.658684 | -0.851399 | -0.232794 |
| 8  | -3.122022 | 2.203288  | 1.859603  |
| 12 | 5.757551  | -0.370022 | 0.482341  |
| 6  | 2.258622  | -0.357928 | -0.021623 |
| 6  | -0.299611 | -0.685193 | -0.150280 |
| 6  | 0.914636  | -0.478754 | -0.096702 |
| 6  | 3.481464  | -0.960460 | 0.464138  |
| 12 | -4.459034 | 0.990317  | -1.192975 |

16

244.454843 Kcal/mol 10.600579 eV -100.994117 H

Child\_12\_19.log

|    |           |           |           |
|----|-----------|-----------|-----------|
| 12 | 5.325347  | -2.629204 | -0.677287 |
| 6  | -0.607406 | 0.370003  | 0.463552  |
| 6  | 4.629214  | -1.190914 | 0.802227  |
| 8  | -3.320194 | -4.025900 | -0.426528 |
| 6  | 3.853359  | -0.152921 | 0.542112  |
| 6  | -1.649928 | 1.814657  | 0.950596  |
| 6  | 2.942215  | 0.748358  | 0.477666  |
| 6  | -1.954059 | 0.471313  | 0.486710  |

|    |           |           |           |
|----|-----------|-----------|-----------|
| 12 | 1.101303  | 1.712564  | 0.471735  |
| 6  | -0.753368 | 2.653270  | 1.289429  |
| 6  | 0.245161  | 2.890313  | -1.301241 |
| 6  | -3.431899 | -2.844653 | -0.264294 |
| 8  | -0.423047 | 3.462646  | -2.034619 |
| 6  | -3.105283 | -0.259734 | 0.232367  |
| 6  | -4.480645 | -0.347857 | 0.123966  |
| 6  | -3.549676 | -1.567549 | -0.110458 |

16

245.211992 Kcal/mol 10.633412 eV -100.992910 H

Original1D\_0\_5.log

|    |          |          |            |
|----|----------|----------|------------|
| 8  | 0.000000 | 0.000000 | 11.037518  |
| 6  | 0.000000 | 0.000000 | 9.879174   |
| 12 | 0.000000 | 0.000000 | 7.759942   |
| 6  | 0.000000 | 0.000000 | 5.811709   |
| 6  | 0.000000 | 0.000000 | 4.507711   |
| 6  | 0.000000 | 0.000000 | 3.222524   |
| 12 | 0.000000 | 0.000000 | 1.196525   |
| 6  | 0.000000 | 0.000000 | -0.804282  |
| 6  | 0.000000 | 0.000000 | -2.049199  |
| 6  | 0.000000 | 0.000000 | -3.391813  |
| 6  | 0.000000 | 0.000000 | -4.629149  |
| 6  | 0.000000 | 0.000000 | -5.961611  |
| 6  | 0.000000 | 0.000000 | -7.194090  |
| 8  | 0.000000 | 0.000000 | -8.435603  |
| 6  | 0.000000 | 0.000000 | -9.746329  |
| 6  | 0.000000 | 0.000000 | -11.026800 |

16

245.499067 Kcal/mol 10.645861 eV -100.992453 H

MutI\_14\_71.log

|    |           |           |           |
|----|-----------|-----------|-----------|
| 8  | -3.248538 | -3.082720 | -0.275167 |
| 6  | -4.409656 | 1.207173  | -1.810460 |
| 6  | 2.872243  | -0.439817 | 0.467016  |
| 6  | -4.745558 | 0.961894  | -0.568848 |
| 12 | -0.274155 | -1.830467 | 0.502784  |
| 6  | 4.157229  | 0.016227  | 0.384198  |
| 6  | 5.389580  | 0.282073  | 0.185991  |
| 6  | -5.281573 | 1.641410  | 0.442041  |
| 8  | 8.955019  | 1.338917  | -0.562098 |
| 6  | -2.218148 | -2.466528 | 0.232610  |
| 6  | 6.627931  | 0.631161  | -0.057526 |
| 6  | -5.776043 | 2.690848  | 0.960479  |
| 12 | -3.874413 | -1.217039 | -0.470137 |
| 6  | -5.506329 | 3.912302  | 0.443121  |
| 6  | 7.826481  | 0.974446  | -0.313576 |
| 6  | 1.752336  | -0.991104 | 0.686016  |

16

246.454135 Kcal/mol 10.687276 eV -100.990931 H

Original3D\_0\_38.log

|   |           |           |           |
|---|-----------|-----------|-----------|
| 6 | -1.299592 | 1.889900  | -0.265981 |
| 6 | -1.683537 | 0.574974  | -0.507027 |
| 8 | 0.956981  | 0.379111  | -0.097821 |
| 6 | -1.303864 | -1.660871 | -0.198154 |
| 6 | 1.093814  | -0.864549 | -0.314947 |
| 8 | -4.179804 | -0.841995 | 1.509411  |
| 6 | -0.382609 | -0.825382 | -2.430417 |

|            |           |           |           |                               |
|------------|-----------|-----------|-----------|-------------------------------|
| 6          | -3.004413 | -0.361716 | 1.645383  |                               |
| 6          | -1.889139 | -0.546986 | 0.330446  |                               |
| 6          | -0.735816 | 3.004584  | -0.194258 |                               |
| 12         | 3.515002  | 0.212107  | 1.246061  |                               |
| 6          | -0.175653 | -1.492874 | -1.018924 |                               |
| 6          | -1.204836 | -0.135790 | -1.696545 |                               |
| 12         | 1.283644  | 2.337016  | -0.032652 |                               |
| 6          | 2.249940  | -1.549828 | 0.021689  |                               |
| 6          | 3.035510  | -2.512530 | 0.319797  |                               |
| 16         |           |           |           |                               |
| 247.510865 | Kcal/mol  | 10.733101 | eV        | -100.989247 H Child_10_39.log |
| 12         | -2.277434 | -1.458200 | 0.599535  |                               |
| 6          | 0.083677  | 3.635999  | 0.881453  |                               |
| 6          | -3.901455 | -0.915983 | -0.519122 |                               |
| 6          | -0.472563 | 2.570245  | 1.249061  |                               |
| 6          | -0.658099 | -2.782241 | 0.132991  |                               |
| 12         | 0.562062  | 4.466567  | -0.895751 |                               |
| 6          | -4.910132 | -0.195232 | -0.905854 |                               |
| 6          | -1.043531 | 1.374922  | 1.528227  |                               |
| 6          | 0.527479  | -3.158951 | -0.044567 |                               |
| 6          | 6.922329  | 1.273147  | -0.813882 |                               |
| 8          | -5.825838 | 0.500706  | -1.278024 |                               |
| 8          | 6.092191  | 1.030564  | -0.059010 |                               |
| 6          | 1.825274  | -3.409484 | -0.184130 |                               |
| 6          | 3.051841  | -4.005918 | -0.322583 |                               |
| 6          | -1.536136 | 0.226385  | 1.563420  |                               |
| 6          | 3.186924  | -2.671317 | -0.189871 |                               |
| 16         |           |           |           |                               |
| 248.352103 | Kcal/mol  | 10.769580 | eV        | -100.987906 H MutI_17_43.log  |
| 6          | -1.286692 | -1.600848 | 0.250721  |                               |
| 6          | 0.873963  | -1.334659 | -0.643188 |                               |
| 6          | 1.490334  | -2.313937 | -1.201292 |                               |
| 6          | 4.836781  | 0.642268  | -0.052588 |                               |
| 6          | -1.954384 | -2.580550 | 0.720065  |                               |
| 6          | 3.084962  | 0.346088  | 1.547165  |                               |
| 6          | -0.344537 | -0.678997 | -0.289574 |                               |
| 8          | -4.796248 | 0.539107  | 0.118759  |                               |
| 6          | -4.783182 | 1.665044  | -0.233402 |                               |
| 12         | 2.901141  | -0.197568 | -0.412038 |                               |
| 6          | 6.068137  | 0.971057  | -0.250783 |                               |
| 6          | -0.724791 | 0.637560  | -0.317050 |                               |
| 6          | 4.147773  | 0.583818  | 1.012105  |                               |
| 12         | -3.445299 | -1.069442 | 0.343757  |                               |
| 6          | -1.359691 | 1.738807  | -0.220750 |                               |
| 8          | -1.924020 | 2.804671  | -0.257409 |                               |
| 16         |           |           |           |                               |
| 249.118591 | Kcal/mol  | 10.802818 | eV        | -100.986685 H MutI_16_71.log  |
| 6          | -0.906306 | 3.164320  | 0.197010  |                               |
| 6          | -3.383801 | 0.402216  | -0.201372 |                               |
| 6          | 4.806191  | 0.275450  | -0.112767 |                               |
| 8          | 3.703074  | 0.969424  | -0.028072 |                               |
| 6          | 5.933043  | -0.339493 | -0.169693 |                               |
| 6          | -1.991977 | 4.138577  | 0.153860  |                               |
| 6          | -2.222837 | 2.708768  | -0.044325 |                               |
| 12         | 0.342044  | -1.512171 | 0.147568  |                               |

|                                                |           |           |           |  |
|------------------------------------------------|-----------|-----------|-----------|--|
| 12                                             | 0.290655  | 1.416193  | 0.041102  |  |
| 6                                              | -0.751462 | -3.567081 | 0.031844  |  |
| 6                                              | -2.885633 | -2.131716 | -0.072997 |  |
| 6                                              | -1.870013 | -2.970455 | 0.048508  |  |
| 6                                              | -2.911341 | 1.541175  | -0.189822 |  |
| 6                                              | -3.385444 | -0.956713 | -0.141230 |  |
| 8                                              | 0.538663  | -3.691386 | 0.101567  |  |
| 6                                              | 2.648532  | 1.556189  | 0.025650  |  |
| 16                                             |           |           |           |  |
| 249.356391 Kcal/mol 10.813130 eV -100.986306 H |           |           |           |  |
| Original3D_10_5.log                            |           |           |           |  |
| 6                                              | 1.045348  | -2.211719 | -1.615382 |  |
| 6                                              | 2.748354  | 0.948227  | 0.436085  |  |
| 12                                             | 1.140602  | 2.010068  | -0.197207 |  |
| 6                                              | 3.384036  | -0.266080 | 0.816386  |  |
| 6                                              | -1.969098 | 1.204934  | -0.328099 |  |
| 12                                             | 1.833013  | -1.515401 | 0.330843  |  |
| 6                                              | -1.312477 | -1.047936 | 1.257133  |  |
| 8                                              | -3.054284 | 1.023406  | 0.431006  |  |
| 6                                              | -0.903426 | 1.937529  | -0.645272 |  |
| 8                                              | -2.654177 | -1.126452 | 1.261585  |  |
| 6                                              | -3.642721 | -0.314231 | 0.909927  |  |
| 6                                              | -1.204911 | 0.592113  | -1.373521 |  |
| 6                                              | 0.231330  | -1.309474 | -2.081069 |  |
| 6                                              | 4.033625  | 1.008189  | 1.101937  |  |
| 6                                              | -0.081077 | -1.055181 | 1.087758  |  |
| 6                                              | -0.664930 | -0.338309 | -2.089943 |  |
| 16                                             |           |           |           |  |
| 249.696531 Kcal/mol 10.827880 eV -100.985764 H |           |           |           |  |
| Child_16_31.log                                |           |           |           |  |
| 6                                              | 5.935343  | 2.010670  | 0.940151  |  |
| 12                                             | -3.769286 | 1.155914  | -2.468846 |  |
| 6                                              | 5.350583  | 0.917635  | 0.350140  |  |
| 6                                              | -3.406370 | 0.360240  | -0.582703 |  |
| 8                                              | 5.371501  | -0.383917 | -0.060206 |  |
| 12                                             | -1.618303 | -0.669258 | -0.383126 |  |
| 6                                              | 4.563045  | 2.047107  | 0.486714  |  |
| 6                                              | -4.021340 | 0.861589  | 0.432069  |  |
| 6                                              | 4.160736  | -0.839628 | -0.422695 |  |
| 6                                              | -4.599276 | 1.394412  | 1.498305  |  |
| 6                                              | 2.959908  | -0.882793 | -0.625214 |  |
| 6                                              | -1.743060 | -3.288589 | 1.569089  |  |
| 6                                              | 1.604757  | -0.912720 | -0.725503 |  |
| 6                                              | -4.946643 | 2.033040  | 2.558618  |  |
| 6                                              | 0.366005  | -0.876191 | -0.726535 |  |
| 8                                              | -1.957883 | -2.464646 | 0.773837  |  |
| 16                                             |           |           |           |  |
| 249.764723 Kcal/mol 10.830837 eV -100.985655 H |           |           |           |  |
| Child_18_10.log                                |           |           |           |  |
| 12                                             | -7.974572 | -0.156359 | -0.018055 |  |
| 6                                              | 3.724778  | -0.549173 | -0.027737 |  |
| 6                                              | -2.625741 | -0.042897 | -0.228023 |  |
| 6                                              | 3.747209  | 0.689427  | -0.194237 |  |
| 6                                              | -1.448066 | 0.801690  | -0.204564 |  |
| 8                                              | 3.468441  | 1.914049  | -0.314004 |  |
| 6                                              | -1.206056 | -0.504651 | -0.175554 |  |
| 6                                              | 2.517057  | -1.276867 | 0.072233  |  |

|    |           |           |           |
|----|-----------|-----------|-----------|
| 6  | -0.397421 | 2.934141  | 0.870204  |
| 6  | 2.173701  | -2.592304 | 0.269420  |
| 8  | -0.574010 | 1.839686  | -0.156214 |
| 6  | 1.241652  | -0.561994 | 0.001567  |
| 6  | -0.002386 | -1.263518 | -0.060992 |
| 6  | 1.215573  | -3.492750 | 0.125245  |
| 12 | 1.458638  | 1.895374  | 0.058339  |
| 6  | 0.232328  | -2.624112 | 0.098829  |

16

250.630104 Kcal/mol 10.868364 eV -100.984276 H

Original3D\_8\_4.log

|    |           |           |           |
|----|-----------|-----------|-----------|
| 6  | -0.589617 | -0.652418 | 0.751534  |
| 12 | 2.385706  | 0.958823  | 1.044489  |
| 6  | -1.045672 | 1.905370  | 1.796338  |
| 6  | -3.986031 | 1.503808  | 0.263927  |
| 6  | -0.762464 | -0.694846 | -1.733213 |
| 6  | 0.517355  | -1.534590 | 1.223329  |
| 8  | -3.517734 | 0.516224  | -0.089486 |
| 6  | 1.617121  | -1.062735 | 1.760731  |
| 6  | -0.664143 | 0.665975  | 1.218507  |
| 6  | 0.046877  | -2.494523 | 0.009941  |
| 6  | -0.710993 | -1.316339 | -0.479485 |
| 8  | 0.258862  | -3.651308 | -0.249753 |
| 6  | 0.355484  | 1.535068  | 1.611388  |
| 6  | -0.446953 | 0.110756  | -2.633500 |
| 6  | 2.889787  | 1.612684  | -0.959280 |
| 12 | 1.176500  | 1.342128  | -2.233437 |

16

251.345184 Kcal/mol 10.899372 eV -100.983136 H

MutI\_18\_75.log

|    |           |           |           |
|----|-----------|-----------|-----------|
| 6  | -1.354004 | -1.248858 | -1.037443 |
| 6  | -2.663135 | -0.915385 | -1.012081 |
| 8  | 1.286919  | 1.396654  | 0.422556  |
| 6  | 4.454315  | 0.739032  | -0.455375 |
| 6  | -0.779972 | -2.717738 | 1.312307  |
| 6  | 1.642757  | -2.045890 | 1.190606  |
| 12 | 2.647772  | -0.070162 | -0.359163 |
| 12 | -4.070077 | 1.176842  | 0.108554  |
| 6  | -1.088895 | 2.041357  | 0.745904  |
| 6  | 0.163568  | 1.726335  | 0.623988  |
| 6  | 0.479163  | -2.511882 | 1.332236  |
| 6  | -3.838931 | -0.490763 | -0.923611 |
| 6  | -0.118606 | -1.153223 | -1.060553 |
| 6  | 5.091939  | 1.823165  | -0.338940 |
| 8  | 1.116059  | -1.124396 | -0.833302 |
| 6  | -2.347559 | 2.177482  | 0.671843  |

16

251.992771 Kcal/mol 10.927455 eV -100.982104 H

Original3D\_0\_41.log

|   |           |           |           |
|---|-----------|-----------|-----------|
| 6 | -0.580100 | -1.175041 | 1.068423  |
| 6 | -2.762805 | -1.576043 | 0.210380  |
| 6 | -3.074104 | -0.544279 | -0.624522 |
| 8 | -0.142685 | -0.108656 | 1.908019  |
| 6 | -1.937781 | 0.410656  | -0.853251 |
| 6 | 0.373066  | 0.535893  | 0.653724  |
| 6 | 0.276929  | -0.812250 | -0.150832 |

|            |           |           |           |                              |
|------------|-----------|-----------|-----------|------------------------------|
| 12         | 3.777285  | 1.007905  | -0.177815 |                              |
| 6          | -0.680069 | 0.291721  | -0.420056 |                              |
| 12         | 1.949775  | -1.592585 | -1.152884 |                              |
| 6          | -1.794121 | -1.749753 | 1.012881  |                              |
| 6          | -3.285235 | 0.866198  | -0.616188 |                              |
| 6          | 3.933211  | -1.230190 | -0.301953 |                              |
| 6          | 2.233367  | 2.336179  | 0.221189  |                              |
| 6          | 1.392318  | 1.502874  | 0.646313  |                              |
| 8          | -4.018913 | 1.843703  | -0.546550 |                              |
| 16         |           |           |           |                              |
| 252.775527 | Kcal/mol  | 10.961398 | eV        | -100.980857 H Child_4_63.log |
| 8          | 3.675850  | 2.251491  | -0.153732 |                              |
| 6          | 4.673433  | -1.567096 | -1.214070 |                              |
| 6          | -1.898085 | 2.473160  | -0.005397 |                              |
| 12         | 2.854684  | -0.916580 | -0.124357 |                              |
| 6          | 2.556026  | 1.799135  | -0.091528 |                              |
| 6          | 0.842277  | -1.446341 | 0.589853  |                              |
| 12         | -3.263808 | 0.985593  | 0.408822  |                              |
| 8          | 1.253673  | -2.442419 | 1.201919  |                              |
| 6          | -0.891618 | 1.754440  | 0.123487  |                              |
| 6          | -0.256665 | -0.577655 | 0.421584  |                              |
| 6          | -4.163659 | -0.612902 | -0.560523 |                              |
| 6          | 1.473988  | 1.084662  | -0.082926 |                              |
| 6          | -1.641480 | -0.916958 | 0.329509  |                              |
| 6          | -3.846317 | -1.546738 | -1.442457 |                              |
| 6          | 0.154958  | 0.776326  | 0.147424  |                              |
| 6          | -2.757306 | -1.103490 | -0.181469 |                              |
| 16         |           |           |           |                              |
| 253.514639 | Kcal/mol  | 10.993449 | eV        | -100.979679 H MutI_16_37.log |
| 8          | -4.761211 | -0.633164 | 0.220786  |                              |
| 6          | -0.703560 | 2.006493  | -0.238914 |                              |
| 6          | -6.732032 | -2.263647 | 0.602755  |                              |
| 6          | 0.533711  | 4.268946  | -0.032530 |                              |
| 6          | -5.761468 | -1.380013 | 0.439573  |                              |
| 6          | 5.184953  | -0.207782 | 0.358223  |                              |
| 6          | -0.108426 | 3.135070  | -0.132364 |                              |
| 6          | 0.226892  | -1.438191 | -0.597638 |                              |
| 6          | 1.298858  | 5.328319  | 0.065557  |                              |
| 6          | 4.013393  | -2.909711 | -0.131074 |                              |
| 6          | -0.438362 | -0.394334 | -0.460443 |                              |
| 6          | -1.204204 | 0.765039  | -0.339795 |                              |
| 12         | 2.033575  | -2.350494 | -0.488440 |                              |
| 12         | -3.256177 | 0.330043  | -0.050773 |                              |
| 6          | 4.112592  | -1.660519 | 0.120704  |                              |
| 8          | 6.278353  | -0.273412 | 0.847494  |                              |
| 16         |           |           |           |                              |
| 254.085850 | Kcal/mol  | 11.018219 | eV        | -100.978769 H MutI_17_57.log |
| 6          | -2.825942 | 1.490324  | 0.472281  |                              |
| 12         | 4.563086  | -0.880331 | 0.100446  |                              |
| 8          | 1.959267  | 1.935188  | -0.624711 |                              |
| 6          | -0.768256 | -1.586804 | 0.074894  |                              |
| 6          | -5.370844 | 1.049726  | 0.741320  |                              |
| 6          | -4.109611 | 1.289830  | 0.632326  |                              |
| 6          | 0.946069  | 1.142927  | -0.031507 |                              |
| 6          | 4.298613  | 0.886888  | -0.841971 |                              |



|    |           |           |           |
|----|-----------|-----------|-----------|
| 6  | 3.170175  | 1.396465  | -0.715332 |
| 8  | -4.285710 | -1.767678 | -1.132875 |
| 12 | 1.279624  | -0.962155 | 0.580684  |
| 6  | 3.107327  | -1.899557 | 1.332614  |
| 6  | -0.296295 | 1.516676  | 0.089846  |
| 6  | -1.579047 | 1.586268  | 0.276602  |
| 6  | -3.197465 | -1.716717 | -0.735423 |
| 6  | -1.958217 | -1.694401 | -0.314463 |

16

254.853882 Kcal/mol 11.051524 eV -100.977545 H

Original3D\_11\_6.log

|    |           |           |           |
|----|-----------|-----------|-----------|
| 12 | 2.038242  | 1.121653  | 1.223958  |
| 6  | -2.255680 | -1.503876 | 0.613171  |
| 6  | 1.593665  | -1.459097 | -0.019071 |
| 6  | -3.045311 | -0.501313 | 0.678597  |
| 6  | 2.373902  | -2.299043 | -0.724117 |
| 6  | -1.349666 | -2.433055 | 0.746972  |
| 6  | -3.764815 | 0.578835  | 0.752030  |
| 6  | 4.279651  | 0.731788  | 0.257302  |
| 8  | 1.845840  | 1.479521  | -2.120379 |
| 6  | 1.627178  | 1.751679  | -1.031520 |
| 6  | 4.027877  | 1.674571  | 1.081187  |
| 6  | 0.887273  | -0.686203 | 0.783864  |
| 6  | -6.212485 | 0.045123  | -1.581031 |
| 12 | 4.132298  | -1.076799 | -0.685015 |
| 8  | -6.508262 | 0.221697  | -0.491476 |
| 6  | -4.286107 | 1.742593  | 0.847204  |

16

254.983203 Kcal/mol 11.057132 eV -100.977339 H

MutI\_15\_61.log

|    |           |           |           |
|----|-----------|-----------|-----------|
| 6  | 0.648399  | -2.236076 | 0.138934  |
| 12 | -1.122759 | 0.654311  | 0.152349  |
| 6  | 3.466617  | 0.162247  | -0.109620 |
| 6  | -5.237608 | -1.479833 | -0.445398 |
| 6  | 1.788240  | 2.167023  | -0.081719 |
| 6  | 3.202140  | 2.830797  | -0.274469 |
| 6  | -3.988826 | -1.272036 | -0.178518 |
| 6  | 3.174910  | 1.508594  | -0.170202 |
| 6  | -0.507667 | -1.517005 | 0.130909  |
| 6  | 1.834767  | -2.588851 | 0.106086  |
| 6  | 0.580695  | 1.821950  | 0.062240  |
| 8  | -1.734125 | -2.032480 | 0.085708  |
| 12 | -2.664554 | 3.540655  | 0.170079  |
| 8  | 3.141347  | -2.360034 | 0.054654  |
| 6  | 3.469915  | -1.047358 | -0.026467 |
| 6  | -2.733250 | -0.882697 | 0.016220  |

16

255.008450 Kcal/mol 11.058227 eV -100.977298 H

MutI\_7\_69.log

|    |           |           |           |
|----|-----------|-----------|-----------|
| 12 | 3.563420  | -2.167066 | -0.007112 |
| 8  | 0.241991  | 3.031631  | -0.250692 |
| 6  | 4.228966  | 0.346510  | -0.644089 |
| 6  | 2.962622  | 0.839948  | -0.193354 |
| 6  | 2.512179  | -0.485221 | -0.225787 |
| 6  | -2.607687 | 0.729436  | 0.121924  |
| 6  | -0.811927 | -1.405474 | 0.765105  |
| 6  | -4.656378 | -0.617853 | -0.185353 |

|                                                |           |           |           |                |
|------------------------------------------------|-----------|-----------|-----------|----------------|
| 6                                              | -1.360412 | 0.943818  | 0.443297  |                |
| 6                                              | 2.252313  | 1.965602  | 0.201391  |                |
| 6                                              | 0.290338  | -0.619860 | 0.551699  |                |
| 12                                             | -2.540192 | -1.300526 | -0.464024 |                |
| 6                                              | 1.553484  | -1.433129 | 0.112186  |                |
| 6                                              | 0.820904  | 1.954274  | 0.116127  |                |
| 6                                              | 0.035281  | 0.787276  | 0.462431  |                |
| 8                                              | -5.691595 | -0.084237 | -0.186786 |                |
| 16                                             |           |           |           |                |
| 255.127572 Kcal/mol 11.063393 eV -100.977109 H |           |           |           | Child_8_10.log |
| 6                                              | -2.952113 | -1.915095 | 1.646260  |                |
| 8                                              | 3.937238  | -0.599564 | 2.717674  |                |
| 6                                              | -3.421420 | 1.616720  | -0.539903 |                |
| 6                                              | 3.926100  | 0.045251  | 1.778333  |                |
| 6                                              | -3.434061 | 0.584623  | 0.167222  |                |
| 12                                             | 3.450246  | -1.422661 | -1.610232 |                |
| 6                                              | -2.468550 | -1.929034 | 0.153227  |                |
| 6                                              | 2.084648  | 3.470051  | 0.260861  |                |
| 6                                              | -3.124083 | -0.623578 | 0.777118  |                |
| 8                                              | 0.973536  | 3.169253  | 0.119812  |                |
| 12                                             | -1.372611 | 1.502585  | -0.865991 |                |
| 6                                              | 1.474210  | -1.358781 | -2.352051 |                |
| 6                                              | -1.214008 | -1.179475 | 0.115816  |                |
| 6                                              | 0.610722  | -0.896100 | -1.529603 |                |
| 6                                              | -0.409181 | -0.459989 | -0.769116 |                |
| 6                                              | -1.775233 | -0.940694 | 1.460970  |                |
| 16                                             |           |           |           |                |
| 256.271694 Kcal/mol 11.113006 eV -100.975285 H |           |           |           |                |
| Original3D_15_3.log                            |           |           |           |                |
| 6                                              | -1.132425 | -0.635641 | 0.928164  |                |
| 6                                              | 0.222810  | -0.241197 | 1.199421  |                |
| 6                                              | 1.141587  | -0.162809 | 0.026392  |                |
| 6                                              | 2.075287  | 0.754293  | 2.091017  |                |
| 12                                             | -0.642111 | 0.293107  | -1.885443 |                |
| 6                                              | 0.889062  | -2.293628 | -0.673738 |                |
| 6                                              | 2.627050  | 0.705244  | 0.821125  |                |
| 8                                              | 0.757348  | 1.767176  | -1.482783 |                |
| 6                                              | -2.396735 | -0.676879 | 0.514252  |                |
| 6                                              | 1.537663  | 1.221644  | -0.655881 |                |
| 8                                              | 0.786118  | -3.396569 | -0.187319 |                |
| 12                                             | -3.996565 | 0.758195  | 0.710157  |                |
| 6                                              | 2.911365  | 1.602433  | -0.236544 |                |
| 6                                              | 0.916090  | -0.974801 | -1.068770 |                |
| 6                                              | -2.437937 | 0.480499  | -0.696543 |                |
| 6                                              | 0.865578  | 0.290762  | 2.328481  |                |
| 16                                             |           |           |           |                |
| 256.476383 Kcal/mol 11.121883 eV -100.974959 H |           |           |           | Child_6_55.log |
| 6                                              | 0.320685  | 2.709755  | 0.107960  |                |
| 6                                              | -5.230234 | -0.799473 | -0.017475 |                |
| 12                                             | 3.448784  | 0.386244  | -0.094317 |                |
| 6                                              | -3.932357 | -0.791662 | -0.035544 |                |
| 6                                              | 2.837251  | 2.359052  | -0.225384 |                |
| 6                                              | -2.638537 | -0.889838 | -0.056041 |                |
| 6                                              | 1.663415  | 2.760653  | -0.087150 |                |
| 6                                              | -6.480389 | -0.441039 | -0.106701 |                |

|                                                |           |           |           |                 |
|------------------------------------------------|-----------|-----------|-----------|-----------------|
| 6                                              | -0.842598 | 2.310443  | 0.247125  |                 |
| 6                                              | 4.807390  | -1.386501 | 0.075158  |                 |
| 6                                              | 1.541044  | -1.152329 | 0.005944  |                 |
| 6                                              | 3.670965  | -1.935546 | 0.041485  |                 |
| 6                                              | -2.122702 | 1.729001  | 0.102992  |                 |
| 8                                              | 2.327254  | -2.259383 | 0.110304  |                 |
| 12                                             | -0.624679 | -1.353946 | -0.056129 |                 |
| 8                                              | -1.758861 | 0.356547  | 0.076088  |                 |
| 16                                             |           |           |           |                 |
| 257.162932 Kcal/mol 11.151654 eV -100.973865 H |           |           |           | Child_12_41.log |
| 6                                              | -4.374458 | -3.457411 | 1.314482  |                 |
| 8                                              | -7.445075 | 2.340020  | 0.562475  |                 |
| 8                                              | 4.217501  | -0.844396 | -0.541810 |                 |
| 6                                              | -6.341953 | 1.965468  | 0.434881  |                 |
| 6                                              | -3.465711 | -2.645432 | 0.862881  |                 |
| 6                                              | 5.178767  | -0.290206 | 0.116331  |                 |
| 6                                              | -5.118378 | 1.560556  | 0.279061  |                 |
| 12                                             | 2.575262  | 0.122883  | -1.056972 |                 |
| 6                                              | 7.887972  | 1.726183  | 1.947349  |                 |
| 6                                              | -2.458730 | -1.954328 | 0.440640  |                 |
| 6                                              | 7.032583  | 0.995293  | 1.310401  |                 |
| 6                                              | -1.429419 | -1.322435 | -0.026093 |                 |
| 6                                              | -3.908074 | 1.173298  | 0.085246  |                 |
| 6                                              | -0.393744 | -0.746114 | -0.527953 |                 |
| 6                                              | 6.102905  | 0.309556  | 0.664639  |                 |
| 12                                             | 0.220573  | 0.222821  | -2.407738 |                 |
| 16                                             |           |           |           |                 |
| 257.766454 Kcal/mol 11.177825 eV -100.972903 H |           |           |           | MutD_15_72.log  |
| 6                                              | -0.484775 | -0.225829 | 0.044942  |                 |
| 6                                              | 2.509793  | -4.641887 | -0.595778 |                 |
| 12                                             | -2.749276 | -0.001408 | 2.108332  |                 |
| 6                                              | 2.713114  | -3.340650 | -0.481367 |                 |
| 6                                              | -0.695966 | 0.429261  | 2.580859  |                 |
| 8                                              | -5.220664 | 1.208780  | -1.398297 |                 |
| 6                                              | 2.718297  | -2.053072 | -0.328924 |                 |
| 6                                              | -2.984768 | -0.971556 | 0.210968  |                 |
| 6                                              | 3.837292  | 2.978111  | -0.199959 |                 |
| 6                                              | -5.818171 | 0.839083  | -2.307380 |                 |
| 6                                              | -1.805119 | -0.717578 | -0.125141 |                 |
| 6                                              | -0.310826 | 0.155908  | 1.397924  |                 |
| 12                                             | 2.306042  | -0.014096 | -0.431559 |                 |
| 8                                              | 0.396334  | -0.037217 | -0.862301 |                 |
| 6                                              | 4.368813  | 4.190026  | -0.226277 |                 |
| 6                                              | 3.271223  | 1.827105  | -0.309284 |                 |
| 16                                             |           |           |           |                 |
| 259.282431 Kcal/mol 11.243565 eV -100.970487 H |           |           |           | Child_4_12.log  |
| 8                                              | 6.192067  | -0.880978 | -0.485136 |                 |
| 8                                              | 1.205908  | 3.323994  | 0.839801  |                 |
| 6                                              | 5.031539  | -0.806389 | -0.234599 |                 |
| 6                                              | -3.956210 | 0.132953  | -0.228428 |                 |
| 6                                              | 3.792246  | -0.748111 | 0.037617  |                 |
| 12                                             | 0.011671  | 2.486348  | -0.177283 |                 |
| 6                                              | -4.545006 | -0.880634 | 0.184532  |                 |
| 6                                              | -1.039075 | -2.023225 | -0.035373 |                 |
| 6                                              | -0.844239 | 0.178501  | 1.011528  |                 |

|            |           |           |           |                              |
|------------|-----------|-----------|-----------|------------------------------|
| 6          | 2.533987  | -0.754289 | 0.237713  |                              |
| 6          | -1.985046 | 1.950600  | -1.039517 |                              |
| 6          | 0.070622  | -1.415677 | 0.131833  |                              |
| 6          | -2.807439 | 0.901724  | -0.567689 |                              |
| 6          | 1.278901  | -0.853339 | 0.358403  |                              |
| 12         | -3.014863 | -2.278374 | 0.074538  |                              |
| 6          | -1.387864 | 0.644584  | -0.123416 |                              |
| 16         |           |           |           |                              |
| 259.520649 | Kcal/mol  | 11.253895 | eV        | -100.970108 H MutI_5_69.log  |
| 6          | -2.445040 | 5.039723  | 0.273883  |                              |
| 6          | 0.415797  | 0.074706  | 0.509259  |                              |
| 6          | -4.554648 | -0.369197 | 0.323953  |                              |
| 12         | -2.557223 | 2.011457  | 0.010721  |                              |
| 12         | -5.276421 | -3.327703 | -1.188633 |                              |
| 6          | 1.447668  | -0.745454 | 0.498207  |                              |
| 6          | -1.845735 | 3.955210  | -0.022660 |                              |
| 8          | -3.607694 | 0.481876  | 0.594074  |                              |
| 6          | -0.591288 | 0.802831  | 0.276668  |                              |
| 6          | -5.406841 | -1.318016 | 0.025938  |                              |
| 6          | 5.836756  | -3.418942 | 0.366114  |                              |
| 8          | 7.680070  | 1.838249  | -0.718076 |                              |
| 6          | 6.840288  | 2.472865  | -1.186201 |                              |
| 6          | 2.457115  | -1.587514 | 0.439059  |                              |
| 6          | 4.579143  | -3.022077 | 0.493969  |                              |
| 6          | 3.504238  | -2.345145 | 0.522971  |                              |
| 16         |           |           |           |                              |
| 259.723448 | Kcal/mol  | 11.262689 | eV        | -100.969785 H Child_7_27.log |
| 6          | 7.230148  | -0.242587 | -0.728204 |                              |
| 6          | -3.623269 | -3.725552 | 0.447799  |                              |
| 8          | 6.577872  | 0.287609  | 0.039435  |                              |
| 8          | -3.154106 | -3.266619 | -0.527355 |                              |
| 6          | -1.931900 | 1.001565  | 1.937755  |                              |
| 6          | 3.012635  | -2.278515 | 0.006788  |                              |
| 12         | -2.946158 | 2.073299  | 0.442660  |                              |
| 6          | 2.188087  | -1.338740 | 0.249743  |                              |
| 6          | -0.894754 | 0.270415  | 1.837291  |                              |
| 6          | 1.203660  | -0.424654 | 0.455957  |                              |
| 6          | -0.990640 | 2.370122  | -0.593747 |                              |
| 12         | -2.822327 | 0.270459  | -1.760719 |                              |
| 6          | 0.261910  | -0.170064 | 1.398568  |                              |
| 6          | 0.817853  | 0.737937  | -0.420448 |                              |
| 6          | 0.390707  | 1.980159  | -0.229816 |                              |
| 6          | -0.692489 | 1.104410  | -1.075010 |                              |
| 16         |           |           |           |                              |
| 260.099398 | Kcal/mol  | 11.278992 | eV        | -100.969186 H Child_9_24.log |
| 12         | 5.576075  | 0.127361  | 0.687915  |                              |
| 8          | -4.064532 | -1.288008 | -0.350098 |                              |
| 6          | 5.209539  | 1.206442  | -1.076917 |                              |
| 6          | -3.041860 | -2.192989 | -0.593219 |                              |
| 6          | 3.975203  | 1.109288  | -1.351761 |                              |
| 6          | -3.467290 | -0.017999 | 0.024099  |                              |
| 6          | 4.006419  | -0.829076 | 1.593601  |                              |
| 6          | -1.792276 | -1.515952 | -0.387633 |                              |
| 6          | 2.777639  | 0.615674  | -1.016003 |                              |
| 6          | -4.245115 | 1.017394  | 0.301098  |                              |

|            |           |           |           |                               |
|------------|-----------|-----------|-----------|-------------------------------|
| 6          | 2.999789  | -0.579480 | 0.885034  |                               |
| 6          | -4.706613 | 2.340143  | 0.648122  |                               |
| 6          | 2.140754  | -0.100053 | -0.140277 |                               |
| 6          | -2.025257 | -0.158244 | 0.003840  |                               |
| 12         | -0.009908 | -0.598267 | -0.127879 |                               |
| 8          | -5.657917 | 1.323005  | 0.342557  |                               |
| 16         |           |           |           |                               |
| 260.152404 | Kcal/mol  | 11.281290 | eV        | -100.969101 H MutD_10_64.log  |
| 6          | -3.807837 | 1.378534  | 1.136391  |                               |
| 8          | 5.608601  | 1.367815  | -0.362620 |                               |
| 6          | 2.011380  | -0.195213 | -0.023060 |                               |
| 12         | -5.593342 | 0.123381  | -0.553327 |                               |
| 6          | 1.811960  | -1.546090 | 0.406460  |                               |
| 8          | 4.075616  | -1.255626 | 0.402166  |                               |
| 6          | -2.672609 | 0.735370  | 0.840975  |                               |
| 6          | -2.142051 | -0.182771 | 0.092947  |                               |
| 6          | -4.165350 | -1.118261 | -1.336380 |                               |
| 6          | -3.098027 | -0.810977 | -0.749346 |                               |
| 6          | 4.640013  | 2.347647  | -0.724159 |                               |
| 6          | 3.447133  | -0.012179 | -0.022892 |                               |
| 12         | 0.010244  | -0.679510 | 0.087207  |                               |
| 6          | 3.078174  | -2.179578 | 0.654564  |                               |
| 6          | 4.202152  | 1.032550  | -0.323625 |                               |
| 6          | -5.051031 | 1.513638  | 0.927636  |                               |
| 16         |           |           |           |                               |
| 260.656142 | Kcal/mol  | 11.303134 | eV        | -100.968298 H Child_12_27.log |
| 6          | -0.319279 | -2.108413 | -1.350965 |                               |
| 6          | 0.390864  | 3.299132  | -0.036794 |                               |
| 6          | -1.609240 | -1.899890 | -1.175775 |                               |
| 12         | 2.225073  | 2.789454  | -0.618993 |                               |
| 6          | -3.029108 | -1.963717 | -1.003776 |                               |
| 6          | -0.408669 | 2.393277  | 0.310824  |                               |
| 6          | 0.904400  | -1.947971 | -1.062058 |                               |
| 6          | 3.050372  | 0.919813  | -0.877693 |                               |
| 6          | -2.370019 | -0.906630 | -0.398472 |                               |
| 12         | -1.102391 | 0.501758  | 0.736766  |                               |
| 6          | 1.771718  | -1.265699 | -0.289699 |                               |
| 6          | 2.613136  | -0.228901 | -0.681505 |                               |
| 6          | -7.788469 | 1.842202  | 0.497686  |                               |
| 6          | 1.389708  | -1.320688 | 1.239970  |                               |
| 8          | 2.111617  | -1.857446 | 2.068574  |                               |
| 8          | 0.257800  | -0.688758 | 1.375959  |                               |
| 16         |           |           |           |                               |
| 261.359156 | Kcal/mol  | 11.333620 | eV        | -100.967178 H Child_5_22.log  |
| 8          | -5.305722 | -1.823966 | 0.299073  |                               |
| 6          | 6.310507  | -0.570718 | -0.449352 |                               |
| 6          | -4.251342 | -1.293168 | 0.135800  |                               |
| 6          | 5.012619  | -0.568760 | -0.241758 |                               |
| 6          | -3.138615 | -0.620413 | -0.024894 |                               |
| 6          | 3.757979  | -0.466838 | 0.046903  |                               |
| 12         | -3.108783 | 1.624354  | -0.159573 |                               |
| 6          | 2.443224  | -0.236320 | 0.289703  |                               |
| 6          | -1.786119 | -0.751430 | -0.125558 |                               |
| 8          | 1.200816  | -2.255351 | -0.227337 |                               |
| 6          | -1.190844 | 2.522021  | -0.507681 |                               |

|            |           |           |           |                              |
|------------|-----------|-----------|-----------|------------------------------|
| 6          | 1.211433  | -1.117662 | -0.001908 |                              |
| 6          | -0.766262 | 1.301019  | -0.404117 |                              |
| 12         | 1.121872  | 1.511653  | 0.208008  |                              |
| 6          | -0.643446 | -0.113455 | -0.266533 |                              |
| 6          | 2.487898  | 1.082802  | 1.356877  |                              |
| 16         |           |           |           |                              |
| 261.665389 | Kcal/mol  | 11.346900 | eV        | -100.966690 H MutI_15_67.log |
| 6          | -0.836865 | 3.048057  | -0.169282 |                              |
| 6          | -2.475438 | -2.558674 | 0.223544  |                              |
| 12         | -3.945953 | 0.074073  | 0.511719  |                              |
| 6          | 0.882444  | 1.205043  | -0.369797 |                              |
| 6          | -3.152926 | 1.913699  | 0.206146  |                              |
| 6          | 0.933119  | -0.025123 | -0.353635 |                              |
| 6          | 5.351601  | -0.014477 | 0.545155  |                              |
| 6          | -2.118644 | 2.585129  | 0.064913  |                              |
| 6          | 6.493624  | 0.567241  | 0.305304  |                              |
| 6          | 0.402230  | 2.478886  | -0.359947 |                              |
| 6          | 0.266236  | 3.932658  | -0.457020 |                              |
| 8          | 0.555695  | -1.231553 | -0.202860 |                              |
| 8          | 1.371636  | -2.575891 | -0.717489 |                              |
| 6          | -3.527149 | -1.892323 | 0.357913  |                              |
| 12         | -0.569252 | -2.841827 | -0.321377 |                              |
| 6          | 4.242403  | -0.628012 | 0.853154  |                              |
| 16         |           |           |           |                              |
| 262.045135 | Kcal/mol  | 11.363367 | eV        | -100.966085 H MutD_1_74.log  |
| 6          | 3.254486  | -2.036749 | 0.152097  |                              |
| 12         | -2.276237 | 1.077637  | 0.753428  |                              |
| 6          | 0.109080  | -0.685956 | 1.394762  |                              |
| 6          | -0.295713 | -2.697181 | 0.224406  |                              |
| 6          | 4.586453  | 1.747643  | 0.620523  |                              |
| 6          | 0.695759  | -1.838722 | 0.789005  |                              |
| 6          | 2.026361  | -1.955313 | 0.568644  |                              |
| 6          | -0.604462 | 0.297876  | 1.651656  |                              |
| 6          | -3.443045 | 0.265619  | -0.918510 |                              |
| 8          | 1.974913  | 0.621816  | -1.843406 |                              |
| 6          | 3.744435  | 1.386475  | -0.291502 |                              |
| 6          | -1.316568 | -3.139211 | -0.339527 |                              |
| 6          | -1.600100 | 4.030782  | -0.367159 |                              |
| 6          | 2.873172  | 0.978699  | -1.132216 |                              |
| 8          | -1.919856 | 3.194884  | 0.362239  |                              |
| 12         | -2.775396 | -1.799085 | -0.942072 |                              |
| 16         |           |           |           |                              |
| 262.355146 | Kcal/mol  | 11.376810 | eV        | -100.965591 H Child_5_56.log |
| 12         | 2.452347  | 0.532597  | -0.884789 |                              |
| 12         | 0.799242  | -2.346913 | 0.451347  |                              |
| 6          | 0.344069  | 0.259354  | -1.143343 |                              |
| 8          | -4.380293 | 0.863241  | -0.446248 |                              |
| 6          | 3.607230  | -1.043398 | -0.331464 |                              |
| 6          | -3.378002 | -0.159161 | -0.122511 |                              |
| 8          | 1.770823  | 2.641761  | -0.115632 |                              |
| 6          | -1.066998 | -1.463167 | -0.158306 |                              |
| 6          | 1.050532  | 3.513183  | 0.130397  |                              |
| 6          | -2.207594 | -0.624322 | -0.520408 |                              |
| 6          | 0.316989  | 0.004094  | 0.198247  |                              |
| 6          | 0.684286  | 0.638169  | 2.725246  |                              |

|            |           |           |           |                              |
|------------|-----------|-----------|-----------|------------------------------|
| 6          | -0.924553 | -0.518456 | -1.205194 |                              |
| 6          | 0.431074  | 0.400559  | 1.478664  |                              |
| 6          | 2.736314  | -1.919114 | -0.009046 |                              |
| 6          | -4.617233 | -0.132444 | 0.573775  |                              |
| 16         |           |           |           |                              |
| 262.514339 | Kcal/mol  | 11.383714 | eV        | -100.965337 H MutD_16_42.log |
| 6          | 2.125260  | 2.552707  | 0.136788  |                              |
| 12         | 0.149417  | 2.749628  | 0.417465  |                              |
| 12         | 3.784197  | 0.126572  | -0.876611 |                              |
| 6          | -4.427397 | -0.481711 | -1.060340 |                              |
| 8          | -1.533039 | 2.180335  | -0.314859 |                              |
| 6          | 3.105736  | 1.943931  | -0.344907 |                              |
| 6          | -4.329201 | -0.883621 | -2.293091 |                              |
| 8          | -1.525056 | 1.432927  | 1.125752  |                              |
| 6          | -0.172358 | -2.187298 | 0.818355  |                              |
| 6          | -0.858521 | -0.995195 | 0.921107  |                              |
| 6          | 0.994396  | -2.715998 | 0.348764  |                              |
| 6          | 2.160849  | -2.344870 | -0.288514 |                              |
| 6          | 0.107364  | -3.580836 | 1.121196  |                              |
| 6          | -1.233627 | 0.165576  | 1.006294  |                              |
| 6          | -4.444093 | -0.235373 | 0.219616  |                              |
| 6          | 3.181822  | -1.807394 | -0.748167 |                              |
| 16         |           |           |           |                              |
| 262.600564 | Kcal/mol  | 11.387453 | eV        | -100.965200 H MutD_14_34.log |
| 6          | 3.844295  | 2.073637  | -0.546304 |                              |
| 6          | -0.406892 | -0.974597 | -0.168607 |                              |
| 6          | 4.370201  | 0.935889  | -0.388066 |                              |
| 6          | 3.283861  | 3.271127  | -0.441506 |                              |
| 6          | 4.903918  | -0.196215 | -0.195322 |                              |
| 6          | -5.059516 | 1.705475  | 0.503733  |                              |
| 6          | -1.843271 | -1.156914 | -0.242453 |                              |
| 8          | 1.724849  | 0.231452  | 0.128088  |                              |
| 6          | -4.212281 | -2.122102 | -0.552887 |                              |
| 8          | 5.762943  | -2.313830 | 0.728164  |                              |
| 6          | -1.652299 | 0.104376  | 0.188462  |                              |
| 12         | -5.315297 | -0.443226 | -0.047444 |                              |
| 12         | -2.821801 | 1.841636  | 0.545066  |                              |
| 6          | -3.004590 | -1.929621 | -0.469126 |                              |
| 6          | 5.343144  | -1.325688 | 0.295523  |                              |
| 6          | 0.723904  | -0.405684 | -0.120360 |                              |
| 16         |           |           |           |                              |
| 262.724130 | Kcal/mol  | 11.392811 | eV        | -100.965003 H Child_9_55.log |
| 8          | 0.329892  | 0.941081  | -1.362142 |                              |
| 6          | 0.099749  | -3.261929 | 0.014644  |                              |
| 6          | -0.478834 | 1.560842  | -0.635889 |                              |
| 6          | 1.426332  | -3.145686 | 0.040192  |                              |
| 6          | -1.888162 | 1.422293  | -0.204794 |                              |
| 6          | 2.583748  | -2.656429 | 0.054550  |                              |
| 6          | -0.303687 | 2.777094  | 0.200750  |                              |
| 6          | -1.107563 | -2.912908 | 0.014035  |                              |
| 6          | -1.685783 | 2.875799  | 0.357666  |                              |
| 6          | -2.171033 | -2.156441 | 0.035301  |                              |
| 12         | 1.771510  | 2.624819  | 0.365908  |                              |
| 12         | 3.310140  | -0.712603 | 0.145307  |                              |
| 6          | -2.799493 | -1.029741 | -0.017870 |                              |

|                                                |           |           |           |                 |
|------------------------------------------------|-----------|-----------|-----------|-----------------|
| 6                                              | 3.502244  | 1.381855  | 0.260962  |                 |
| 6                                              | -2.681353 | 0.372802  | -0.157035 |                 |
| 8                                              | -3.824490 | -0.230067 | 0.623435  |                 |
| 16                                             |           |           |           |                 |
| 263.099458 Kcal/mol 11.409087 eV -100.964405 H |           |           |           | Child_14_20.log |
| 8                                              | -2.559426 | -2.733336 | -0.259019 |                 |
| 6                                              | 1.081219  | 4.645514  | -0.361410 |                 |
| 6                                              | -3.047701 | -1.568382 | 0.172850  |                 |
| 8                                              | 0.879973  | 3.478623  | -0.293903 |                 |
| 12                                             | -0.754732 | -2.158822 | -0.483355 |                 |
| 6                                              | 2.302629  | -0.120587 | 0.216480  |                 |
| 6                                              | -3.722147 | -0.557554 | 0.402740  |                 |
| 6                                              | 3.460749  | -0.701540 | 0.410458  |                 |
| 6                                              | -4.121240 | 0.654943  | 0.813745  |                 |
| 6                                              | 4.668055  | -1.164711 | 0.599944  |                 |
| 6                                              | 1.145091  | -0.836398 | -0.277246 |                 |
| 6                                              | 5.880777  | -1.719687 | 0.707182  |                 |
| 6                                              | 0.015832  | -0.212411 | -0.882294 |                 |
| 12                                             | 0.829732  | 1.358579  | -0.159741 |                 |
| 6                                              | -4.281102 | 2.026718  | 1.169440  |                 |
| 6                                              | -1.292893 | 0.160864  | -0.948468 |                 |
| 16                                             |           |           |           |                 |
| 263.661016 Kcal/mol 11.433438 eV -100.963510 H |           |           |           |                 |
| Original2D_4_1.log                             |           |           |           |                 |
| 6                                              | 3.022116  | 0.005803  | 0.000000  |                 |
| 8                                              | 1.532510  | -4.430092 | -0.000000 |                 |
| 6                                              | -1.398058 | -1.900526 | -0.000000 |                 |
| 6                                              | -2.891815 | -4.029819 | -0.000000 |                 |
| 6                                              | 2.117806  | -0.926430 | -0.000000 |                 |
| 12                                             | -0.000000 | -0.327905 | -0.000000 |                 |
| 8                                              | -4.166093 | 0.169555  | -0.000000 |                 |
| 6                                              | -2.164598 | -2.929365 | -0.000000 |                 |
| 6                                              | 0.393143  | 1.749208  | 0.000000  |                 |
| 6                                              | 1.564168  | 4.891453  | 0.000000  |                 |
| 6                                              | 1.747859  | 2.274036  | 0.000000  |                 |
| 12                                             | -0.262944 | 3.778083  | 0.000000  |                 |
| 6                                              | 2.670008  | 1.263913  | 0.000000  |                 |
| 6                                              | 1.965776  | 3.699858  | 0.000000  |                 |
| 6                                              | -5.296891 | -0.040328 | -0.000000 |                 |
| 6                                              | 2.307816  | -5.277444 | -0.000000 |                 |
| 16                                             |           |           |           |                 |
| 265.725273 Kcal/mol 11.522953 eV -100.960220 H |           |           |           | Child_18_20.log |
| 6                                              | -4.324680 | -1.786113 | -0.511587 |                 |
| 6                                              | -1.417885 | 4.667540  | 1.101524  |                 |
| 6                                              | -3.099353 | -2.072345 | -0.220758 |                 |
| 12                                             | 1.733717  | 3.184800  | -1.001390 |                 |
| 6                                              | -5.480979 | -1.215249 | -0.732694 |                 |
| 8                                              | -1.085282 | 3.717557  | 0.460360  |                 |
| 6                                              | 4.423656  | -1.405454 | 0.183127  |                 |
| 6                                              | -2.186837 | 0.297523  | 0.976417  |                 |
| 6                                              | 3.200743  | -1.936614 | 0.185131  |                 |
| 6                                              | 1.109531  | 1.237485  | -0.793227 |                 |
| 6                                              | 2.011074  | -2.303746 | 0.156320  |                 |
| 6                                              | -1.011616 | 0.319001  | 0.401222  |                 |
| 8                                              | 0.775228  | -2.584017 | 0.165164  |                 |



|                                                |           |           |            |                 |
|------------------------------------------------|-----------|-----------|------------|-----------------|
| 6                                              | 0.096045  | 0.821912  | -0.211024  |                 |
| 6                                              | 5.559664  | -0.761124 | 0.146279   |                 |
| 12                                             | -0.966696 | -1.871901 | 0.244010   |                 |
| 16                                             |           |           |            |                 |
| 266.513007 Kcal/mol 11.557112 eV -100.958965 H |           |           |            | MutI_17_67.log  |
| 6                                              | -3.438575 | 2.197160  | 0.255116   |                 |
| 6                                              | 1.617579  | 3.235634  | 0.023681   |                 |
| 6                                              | 0.374728  | 3.218861  | 0.077013   |                 |
| 6                                              | 3.826077  | 0.221394  | -0.162949  |                 |
| 6                                              | -0.962116 | 3.030088  | 0.125000   |                 |
| 6                                              | -0.375690 | -3.232071 | 0.121314   |                 |
| 12                                             | 3.295357  | 2.159267  | -0.024622  |                 |
| 6                                              | -3.930173 | -0.177613 | -0.588624  |                 |
| 6                                              | -2.129539 | 2.619795  | 0.129661   |                 |
| 8                                              | 3.605631  | -0.986472 | -0.084990  |                 |
| 6                                              | -1.620612 | -3.220864 | 0.145505   |                 |
| 8                                              | -3.619409 | 0.954488  | -0.160409  |                 |
| 12                                             | -3.249362 | -2.059896 | 0.077147   |                 |
| 6                                              | 2.137665  | -2.682915 | 0.029193   |                 |
| 6                                              | 3.461474  | -2.292954 | -0.012545  |                 |
| 6                                              | 0.965563  | -3.072612 | 0.079782   |                 |
| 16                                             |           |           |            |                 |
| 266.852654 Kcal/mol 11.571841 eV -100.958424 H |           |           |            |                 |
| Original1D_15_0.log                            |           |           |            |                 |
| 6                                              | 0.000000  | 0.000000  | -2.044904  |                 |
| 6                                              | 0.000000  | 0.000000  | -3.331199  |                 |
| 12                                             | 0.000000  | 0.000000  | -0.030595  |                 |
| 6                                              | 0.000000  | 0.000000  | -4.608458  |                 |
| 12                                             | 0.000000  | 0.000000  | 2.758142   |                 |
| 8                                              | 0.000000  | 0.000000  | 4.648420   |                 |
| 8                                              | 0.000000  | 0.000000  | -5.843117  |                 |
| 6                                              | 0.000000  | 0.000000  | -7.111887  |                 |
| 6                                              | 0.000000  | 0.000000  | -8.351577  |                 |
| 6                                              | 0.000000  | 0.000000  | -9.673812  |                 |
| 6                                              | 0.000000  | 0.000000  | -10.957301 |                 |
| 6                                              | 0.000000  | 0.000000  | 5.889510   |                 |
| 6                                              | 0.000000  | 0.000000  | 7.139145   |                 |
| 6                                              | 0.000000  | 0.000000  | 8.439101   |                 |
| 6                                              | 0.000000  | 0.000000  | 9.720981   |                 |
| 6                                              | 0.000000  | 0.000000  | 11.028238  |                 |
| 16                                             |           |           |            |                 |
| 266.963323 Kcal/mol 11.576640 eV -100.958247 H |           |           |            | Child_17_16.log |
| 6                                              | 3.926314  | -0.208935 | -0.741471  |                 |
| 6                                              | -4.975474 | -0.648951 | 0.140788   |                 |
| 6                                              | 3.868194  | -1.560228 | -0.593089  |                 |
| 6                                              | -4.209463 | 0.389156  | -0.217990  |                 |
| 6                                              | 3.451683  | 0.929786  | -0.431438  |                 |
| 12                                             | -3.031342 | -1.639195 | 0.260687   |                 |
| 6                                              | 2.607830  | -1.788075 | -0.321549  |                 |
| 6                                              | -3.513036 | 1.434477  | -0.589627  |                 |
| 6                                              | 2.339051  | 0.977534  | 0.373066   |                 |
| 6                                              | -1.057907 | -1.048833 | -0.069414  |                 |
| 6                                              | 0.223312  | 2.488845  | 0.401762   |                 |
| 6                                              | 0.178961  | -1.226307 | 0.077886   |                 |
| 12                                             | -1.392973 | 1.174254  | -0.499071  |                 |

|                                                |           |           |           |                 |
|------------------------------------------------|-----------|-----------|-----------|-----------------|
| 6                                              | 1.549648  | -1.230259 | 0.310540  |                 |
| 8                                              | 1.968325  | -0.085487 | 1.218968  |                 |
| 8                                              | 1.376313  | 1.901742  | 0.384009  |                 |
| 16                                             |           |           |           |                 |
| 267.276824 Kcal/mol 11.590235 eV -100.957748 H |           |           |           | MutI_5_75.log   |
| 6                                              | -1.649989 | -1.897641 | -1.476691 |                 |
| 6                                              | -0.219213 | -2.314381 | -0.610358 |                 |
| 6                                              | -0.833009 | -1.875886 | 1.735380  |                 |
| 6                                              | 1.717210  | -0.977804 | -1.267605 |                 |
| 6                                              | 1.079604  | -2.003989 | -1.010867 |                 |
| 12                                             | -1.956426 | -0.016425 | 2.380807  |                 |
| 12                                             | -2.385265 | 1.698996  | -0.242127 |                 |
| 8                                              | -2.377854 | -1.048461 | -1.555410 |                 |
| 6                                              | 4.660817  | 0.047163  | 1.257650  |                 |
| 6                                              | -2.802838 | 1.604952  | 1.816594  |                 |
| 6                                              | 0.376566  | 2.353774  | -1.212808 |                 |
| 6                                              | 1.908805  | 0.334489  | -1.439021 |                 |
| 6                                              | -0.772097 | 2.761032  | -0.947353 |                 |
| 6                                              | 1.360530  | 1.445249  | -1.400875 |                 |
| 6                                              | -0.452099 | -2.372040 | 0.695513  |                 |
| 8                                              | 5.609677  | 0.695914  | 1.242720  |                 |
| 16                                             |           |           |           |                 |
| 268.130709 Kcal/mol 11.627263 eV -100.956387 H |           |           |           | Child_12_50.log |
| 6                                              | 9.289098  | -2.188327 | -1.478996 |                 |
| 6                                              | -6.440740 | -1.716940 | 2.913484  |                 |
| 6                                              | 8.186856  | -1.722953 | -0.963331 |                 |
| 6                                              | -6.666934 | -1.538965 | 1.656163  |                 |
| 6                                              | 7.106374  | -1.243503 | -0.446307 |                 |
| 6                                              | -6.899942 | -1.323675 | 0.388925  |                 |
| 6                                              | 6.036593  | -0.754523 | 0.073920  |                 |
| 6                                              | -7.094774 | -1.355638 | -0.887168 |                 |
| 6                                              | 4.970154  | -0.258396 | 0.555789  |                 |
| 8                                              | -7.394598 | -0.388003 | -1.782429 |                 |
| 6                                              | 3.837846  | 0.269084  | 0.980578  |                 |
| 6                                              | -7.634775 | 0.297510  | -2.735406 |                 |
| 6                                              | 2.748183  | 0.749264  | 1.368385  |                 |
| 12                                             | 0.389335  | 2.328829  | -1.363728 |                 |
| 12                                             | 0.929271  | 1.675069  | 1.585205  |                 |
| 8                                              | -0.161764 | 2.472452  | 0.380685  |                 |
| 16                                             |           |           |           |                 |
| 268.731388 Kcal/mol 11.653311 eV -100.955430 H |           |           |           | MutI_14_41.log  |
| 8                                              | -7.684063 | -1.644472 | 1.136535  |                 |
| 6                                              | -1.086783 | 0.573479  | -1.475577 |                 |
| 6                                              | 3.580353  | 0.371160  | 1.419177  |                 |
| 6                                              | 4.027170  | -0.900148 | 1.274578  |                 |
| 6                                              | 4.174358  | -2.100964 | 0.954754  |                 |
| 6                                              | 1.965243  | 2.292377  | 0.988451  |                 |
| 6                                              | -1.167807 | 1.924656  | -1.134323 |                 |
| 6                                              | -1.582501 | 2.593705  | 0.111132  |                 |
| 6                                              | -0.832663 | -0.626098 | -1.651323 |                 |
| 12                                             | 2.867394  | -3.077756 | -0.313426 |                 |
| 8                                              | -6.512511 | -1.235887 | 1.235098  |                 |
| 6                                              | -0.435993 | 3.102492  | -1.643060 |                 |
| 6                                              | 0.977811  | 2.869148  | 0.530723  |                 |
| 6                                              | 2.929543  | 1.415437  | 1.335689  |                 |

|            |           |           |           |                              |
|------------|-----------|-----------|-----------|------------------------------|
| 6          | -0.198916 | 3.015251  | -0.190898 |                              |
| 12         | 0.422081  | -2.267252 | -1.527325 |                              |
| 16         |           |           |           |                              |
| 269.178119 | Kcal/mol  | 11.672683 | eV        | -100.954718 H Child_4_13.log |
| 6          | -1.739667 | 1.652903  | 0.165840  |                              |
| 8          | 2.876400  | -1.167358 | 1.156309  |                              |
| 12         | 0.409945  | 1.856567  | 0.032192  |                              |
| 6          | 1.536807  | -1.993177 | 1.124894  |                              |
| 12         | -4.244970 | -0.785058 | -0.720850 |                              |
| 6          | 3.031849  | -0.477865 | 0.008328  |                              |
| 6          | -2.876938 | 0.968221  | 0.638740  |                              |
| 6          | 1.056751  | -1.759827 | -0.215340 |                              |
| 8          | -4.053475 | 0.703274  | 1.008846  |                              |
| 6          | 3.613092  | 0.817199  | -0.231691 |                              |
| 6          | -1.921185 | 0.224184  | -0.182925 |                              |
| 6          | -0.396798 | -1.914143 | -0.378667 |                              |
| 6          | 2.098781  | 0.513780  | -1.072295 |                              |
| 6          | 4.052042  | 2.046457  | -0.155468 |                              |
| 6          | -1.116671 | -0.834073 | -0.327878 |                              |
| 6          | 1.901420  | -0.767899 | -0.883097 |                              |
| 16         |           |           |           |                              |
| 269.207225 | Kcal/mol  | 11.673945 | eV        | -100.954671 H Child_3_46.log |
| 6          | 3.319675  | 0.222344  | -1.320761 |                              |
| 6          | -8.140030 | -0.480682 | -1.054705 |                              |
| 6          | 2.469258  | 4.113130  | -1.276111 |                              |
| 6          | -6.909836 | -0.359773 | -0.685431 |                              |
| 12         | 3.641194  | -1.778383 | -1.259550 |                              |
| 6          | -5.650273 | -0.235977 | -0.307342 |                              |
| 8          | 2.861419  | 4.171757  | -0.191852 |                              |
| 6          | -4.456124 | -0.118611 | 0.051112  |                              |
| 6          | 3.109120  | 0.569738  | -0.116791 |                              |
| 6          | -3.188646 | 0.005963  | 0.431578  |                              |
| 6          | 3.445690  | -3.547585 | -0.279464 |                              |
| 6          | -2.011089 | 0.121698  | 0.785051  |                              |
| 6          | 3.314113  | -4.484332 | 0.580871  |                              |
| 8          | -0.801112 | 0.240621  | 1.148257  |                              |
| 6          | 2.823384  | 1.047605  | 1.104513  |                              |
| 12         | 0.922647  | 0.410039  | 1.665686  |                              |
| 16         |           |           |           |                              |
| 269.431079 | Kcal/mol  | 11.683652 | eV        | -100.954315 H Child_9_37.log |
| 6          | 4.288230  | 1.680600  | -0.586605 |                              |
| 6          | -5.098286 | -1.805142 | -0.815783 |                              |
| 6          | 3.648606  | 0.401249  | -0.456598 |                              |
| 6          | -5.986253 | -0.880966 | -0.711603 |                              |
| 6          | 2.818465  | 1.481411  | -0.342199 |                              |
| 12         | -4.210602 | 0.053859  | -0.323408 |                              |
| 8          | 4.560378  | -1.827630 | -0.383255 |                              |
| 8          | -2.826585 | 1.568539  | 0.037966  |                              |
| 6          | 3.593384  | -1.071125 | -0.484622 |                              |
| 12         | 0.737433  | 1.384758  | -0.148902 |                              |
| 6          | -0.003370 | -0.541372 | 0.451486  |                              |
| 6          | 2.187285  | -1.431371 | -0.538924 |                              |
| 6          | -0.263214 | -0.626190 | 1.789963  |                              |
| 6          | 1.020717  | -1.284640 | -0.142616 |                              |
| 6          | -1.777274 | 2.057799  | 0.218783  |                              |

|            |           |           |           |                              |
|------------|-----------|-----------|-----------|------------------------------|
| 6          | 0.206325  | -0.512033 | 3.023724  |                              |
| 16         |           |           |           |                              |
| 269.453280 | Kcal/mol  | 11.684615 | eV        | -100.954279 H MutD_3_64.log  |
| 12         | -2.329663 | 0.402246  | 0.355315  |                              |
| 8          | -2.568659 | 2.031909  | -0.758126 |                              |
| 6          | -1.622394 | 2.585162  | -1.408369 |                              |
| 6          | 1.077573  | -0.534058 | 2.992058  |                              |
| 6          | -3.044945 | -1.465821 | -0.371031 |                              |
| 6          | -3.670495 | -2.585498 | -0.743984 |                              |
| 6          | 0.152847  | 0.072466  | 2.106841  |                              |
| 6          | 3.787378  | -0.495394 | -0.666686 |                              |
| 6          | 0.923891  | 1.940015  | -1.160736 |                              |
| 12         | 2.321574  | 0.906470  | 0.028287  |                              |
| 6          | 4.635634  | -1.419527 | -0.963388 |                              |
| 6          | -0.278101 | 2.193460  | -1.328289 |                              |
| 8          | -1.011859 | 0.339516  | 1.655673  |                              |
| 6          | 5.447974  | -2.396610 | -1.358027 |                              |
| 6          | -4.146465 | -3.847377 | -0.904170 |                              |
| 6          | 1.527305  | 0.173849  | 1.841845  |                              |
| 16         |           |           |           |                              |
| 269.505061 | Kcal/mol  | 11.686860 | eV        | -100.954197 H MutD_14_52.log |
| 6          | -5.703988 | 0.680161  | 2.055576  |                              |
| 12         | -3.975629 | -1.187969 | -1.607764 |                              |
| 6          | -1.341741 | -0.883355 | 0.325182  |                              |
| 8          | 7.165623  | 1.077868  | 1.131993  |                              |
| 12         | 3.459712  | -1.170151 | 0.215628  |                              |
| 8          | -1.164407 | 3.080941  | -0.902080 |                              |
| 6          | -0.222043 | -1.141889 | -0.155232 |                              |
| 6          | -4.594221 | 0.129843  | 1.372149  |                              |
| 6          | 2.086415  | -1.283332 | -1.374432 |                              |
| 6          | -3.970147 | -0.739415 | 0.411716  |                              |
| 6          | 0.989144  | -1.248166 | -0.736793 |                              |
| 6          | -0.446197 | 3.359722  | -1.754280 |                              |
| 6          | -2.600832 | -0.443453 | 0.754598  |                              |
| 6          | 5.505905  | -0.372277 | -0.078239 |                              |
| 6          | 6.515639  | 0.318910  | 0.418869  |                              |
| 6          | -3.187722 | 0.794413  | 1.238607  |                              |
| 16         |           |           |           |                              |
| 270.342232 | Kcal/mol  | 11.723164 | eV        | -100.952863 H MutI_14_39.log |
| 6          | 0.475546  | 2.213536  | 2.096434  |                              |
| 12         | 1.673905  | -0.110692 | -0.293517 |                              |
| 6          | -4.951133 | -1.016312 | 0.237119  |                              |
| 6          | -2.470307 | -1.100991 | -0.010919 |                              |
| 6          | 3.376266  | -1.007575 | 0.491525  |                              |
| 6          | 3.292065  | 1.482796  | -0.506893 |                              |
| 6          | -5.950724 | -0.256712 | -0.010120 |                              |
| 6          | 3.903186  | 0.342155  | -0.292964 |                              |
| 8          | -0.084114 | -0.664822 | -0.286305 |                              |
| 6          | -7.482180 | 1.566252  | -0.904287 |                              |
| 6          | -3.723345 | -1.225136 | 0.163788  |                              |
| 12         | 5.772697  | 0.428064  | -1.281289 |                              |
| 8          | 4.015792  | -1.787861 | 1.154063  |                              |
| 6          | 1.374240  | 1.766380  | 1.270945  |                              |
| 6          | -1.269634 | -0.800610 | -0.134695 |                              |
| 6          | -6.709422 | 0.671718  | -0.407332 |                              |

16

271.187607 Kcal/mol 11.759822 eV -100.951515 H

Original1D\_3\_0.log

|    |          |          |            |
|----|----------|----------|------------|
| 6  | 0.000000 | 0.000000 | -9.509686  |
| 6  | 0.000000 | 0.000000 | -8.189936  |
| 6  | 0.000000 | 0.000000 | -6.949713  |
| 6  | 0.000000 | 0.000000 | -10.793027 |
| 8  | 0.000000 | 0.000000 | -5.677757  |
| 6  | 0.000000 | 0.000000 | -4.453635  |
| 6  | 0.000000 | 0.000000 | -3.177564  |
| 6  | 0.000000 | 0.000000 | -1.916641  |
| 8  | 0.000000 | 0.000000 | -0.672687  |
| 12 | 0.000000 | 0.000000 | 1.217135   |
| 12 | 0.000000 | 0.000000 | 4.003655   |
| 6  | 0.000000 | 0.000000 | 6.029350   |
| 6  | 0.000000 | 0.000000 | 7.295748   |
| 6  | 0.000000 | 0.000000 | 8.604260   |
| 6  | 0.000000 | 0.000000 | 9.888651   |
| 6  | 0.000000 | 0.000000 | 11.197872  |

16

271.856531 Kcal/mol 11.788830 eV -100.950449 H

Child\_6\_21.log

|    |           |           |           |
|----|-----------|-----------|-----------|
| 6  | 2.626405  | 3.178843  | -1.462784 |
| 6  | -2.502023 | -1.437032 | -0.342856 |
| 6  | 2.090409  | 2.232594  | -2.135519 |
| 6  | -1.508948 | -2.201021 | -0.529305 |
| 12 | 0.850014  | 2.409972  | -0.355854 |
| 6  | -0.296205 | -2.679216 | -0.500291 |
| 8  | 4.566634  | 0.827845  | 1.371426  |
| 6  | 0.904551  | -3.047352 | -0.409361 |
| 6  | -0.775321 | 1.830119  | 0.699962  |
| 12 | -3.602702 | 0.266360  | 0.517822  |
| 6  | -5.524372 | 1.058061  | -0.050781 |
| 6  | 2.173960  | -3.265763 | -0.228227 |
| 6  | 5.665519  | 1.140323  | 1.465225  |
| 6  | -5.954042 | -0.040610 | 0.448050  |
| 6  | -1.894733 | 1.317560  | 0.955900  |
| 8  | 3.308500  | -3.407222 | -0.046888 |

16

272.038588 Kcal/mol 11.796725 eV -100.950159 H

MutI\_16\_75.log

|    |           |           |           |
|----|-----------|-----------|-----------|
| 6  | -1.062661 | 2.289678  | 0.611012  |
| 6  | -7.826586 | -1.064406 | 0.816310  |
| 6  | -1.217795 | -0.338560 | -0.099660 |
| 6  | -2.017001 | 2.673074  | 1.368885  |
| 8  | 0.138186  | 2.174442  | -0.015054 |
| 6  | 2.159411  | -1.753233 | 0.500961  |
| 6  | 4.728534  | -1.805748 | 0.706511  |
| 8  | -2.347975 | -0.283788 | -0.402732 |
| 6  | 1.052539  | -1.295591 | 0.273784  |
| 6  | 0.745560  | 1.036666  | -0.305970 |
| 12 | 5.289872  | -0.135108 | -0.378358 |
| 12 | 2.832393  | 1.086914  | -0.821279 |
| 6  | 3.492676  | -1.990687 | 0.686054  |
| 6  | -6.395899 | -0.984673 | -1.334526 |
| 6  | -7.089986 | -0.940555 | -0.234867 |
| 6  | 0.133062  | -0.250448 | -0.032172 |

16  
272.971576 Kcal/mol 11.837183 eV -100.948672 H

Original3D\_3\_6.log  
6 4.584224 0.448727 -0.039958  
6 5.925843 -0.064380 0.537738  
12 2.640339 -0.117381 -0.548624  
6 0.222197 -1.377851 0.924093  
6 -0.461275 -2.306218 1.443710  
6 -0.247224 0.935988 0.430119  
6 -1.642455 1.149615 0.584863  
6 5.680077 1.212551 0.022585  
6 0.920953 -0.504694 -1.616151  
6 0.491097 -0.249031 0.077947  
6 -0.340414 -0.756158 -1.471602  
12 -1.903833 -1.120493 0.070729  
6 -4.326358 0.507431 -0.191672  
8 -4.775099 1.575945 -0.103027  
6 -0.685306 2.199381 0.791621  
8 -3.920679 -0.615655 -0.300101

16  
273.055133 Kcal/mol 11.840806 eV -100.948539 H

Original3D\_0\_33.log  
6 -1.434884 0.876723 0.100845  
8 1.206236 -0.886786 0.470829  
6 -1.906877 -1.584305 -0.099716  
6 -1.118472 -0.493759 -0.128498  
6 2.630673 0.669798 -0.764620  
6 2.526856 -0.450438 0.232262  
6 0.278080 -0.249785 -0.323548  
6 -1.369103 2.135328 0.265847  
6 3.509997 -0.874251 1.031203  
12 -3.284989 3.164789 0.661292  
6 -2.008227 -3.007229 -0.315994  
6 -3.256444 -2.085243 -0.108361  
6 -3.364213 -3.535961 -0.326757  
12 0.782857 1.880668 -0.488817  
8 3.326419 0.617739 -1.785762  
6 4.473337 -1.133063 1.845630

16  
274.808724 Kcal/mol 11.916849 eV -100.945745 H MutD\_13\_50.log

6 -3.774553 -1.369475 2.402219  
8 9.228905 -0.436610 0.348664  
6 1.690559 -0.473490 -1.469825  
12 -2.312565 0.396722 -0.273725  
6 -0.213462 0.852874 0.188558  
12 0.942710 2.416605 0.941453  
6 -0.455863 -1.585235 -0.522821  
6 -3.627537 -1.600058 1.023748  
6 -0.508266 -0.399146 0.224263  
6 8.350246 0.190665 0.852733  
6 -2.747180 -2.223228 0.175123  
6 -4.649241 2.412620 -0.883549  
6 -1.636211 -2.417967 -0.445409  
6 2.409580 0.682739 -1.604064  
6 0.710695 -1.529610 -1.416467

|            |           |           |           |                               |
|------------|-----------|-----------|-----------|-------------------------------|
| 8          | -3.835697 | 1.811103  | -0.243638 |                               |
| 16         |           |           |           |                               |
| 275.001940 | Kcal/mol  | 11.925228 | eV        | -100.945437 H Child_17_17.log |
| 6          | -3.837854 | -0.411637 | -0.019113 |                               |
| 6          | 5.438801  | 2.721408  | -0.537976 |                               |
| 8          | -3.378666 | -1.544056 | -0.291715 |                               |
| 6          | 4.532001  | 1.787875  | -0.224373 |                               |
| 6          | -3.959270 | 0.807496  | 0.302821  |                               |
| 6          | 3.667239  | 0.889270  | 0.065433  |                               |
| 6          | -2.840374 | 1.619429  | 0.035460  |                               |
| 12         | 2.402709  | -0.711286 | 0.551728  |                               |
| 12         | -1.353592 | -0.798069 | -0.355253 |                               |
| 6          | 0.255132  | -2.119045 | -0.023680 |                               |
| 6          | -2.025523 | 2.764661  | 0.160242  |                               |
| 8          | 0.487566  | -0.894064 | 0.534955  |                               |
| 6          | -1.233218 | 3.812926  | 0.245880  |                               |
| 6          | 1.960890  | -4.053657 | -0.201865 |                               |
| 6          | 1.401587  | -2.914577 | -0.049838 |                               |
| 6          | -1.602847 | 1.365389  | -0.470260 |                               |
| 16         |           |           |           |                               |
| 277.827617 | Kcal/mol  | 12.047761 | eV        | -100.940934 H MutD_15_42.log  |
| 12         | 2.230395  | 0.200440  | 0.375186  |                               |
| 6          | -0.405671 | 0.256047  | 0.718924  |                               |
| 6          | 3.416758  | -1.534772 | -0.004348 |                               |
| 6          | 3.550471  | 1.419650  | -0.783970 |                               |
| 12         | -5.070942 | 0.613640  | 0.367536  |                               |
| 6          | 4.261892  | -2.460405 | -0.276291 |                               |
| 6          | 4.485835  | 1.885487  | -1.615169 |                               |
| 8          | -7.020416 | -1.073028 | -1.649646 |                               |
| 6          | 5.122187  | -3.433612 | -0.516716 |                               |
| 6          | -3.038543 | 0.460369  | 0.577299  |                               |
| 6          | -6.349465 | -0.906934 | -0.719026 |                               |
| 8          | 0.287379  | 0.111256  | -0.368686 |                               |
| 6          | 0.367334  | 0.329955  | 1.896255  |                               |
| 6          | -1.814072 | 0.341723  | 0.671180  |                               |
| 6          | 3.666021  | 2.952608  | -1.379691 |                               |
| 6          | 1.395731  | 0.344088  | 2.637218  |                               |
| 16         |           |           |           |                               |
| 279.178677 | Kcal/mol  | 12.106349 | eV        | -100.938781 H MutD_14_60.log  |
| 6          | 1.847547  | 3.254019  | 0.690492  |                               |
| 6          | -4.871828 | 1.135951  | -0.609102 |                               |
| 6          | 4.859550  | -1.201650 | -1.116892 |                               |
| 6          | 3.058033  | 3.069633  | 0.075684  |                               |
| 6          | 3.717355  | -0.951141 | -0.590048 |                               |
| 6          | -3.254285 | -1.204918 | 0.217929  |                               |
| 6          | 1.061098  | -0.916902 | 2.459128  |                               |
| 8          | -4.506372 | 2.171507  | -0.945347 |                               |
| 6          | 6.059666  | -1.487292 | -1.592460 |                               |
| 12         | 1.925768  | -0.191827 | 0.331415  |                               |
| 6          | -0.637998 | -0.900437 | 0.451104  |                               |
| 6          | 2.591307  | 1.830616  | 0.207921  |                               |
| 6          | 0.082039  | -0.996334 | 1.658845  |                               |
| 8          | 0.090264  | -0.561520 | -0.574674 |                               |
| 12         | -5.224238 | -1.143322 | -0.411448 |                               |
| 6          | -2.027400 | -1.107895 | 0.334160  |                               |

16  
 281.251092 Kcal/mol 12.196217 eV -100.935478 H MutI\_18\_65.log  
 6 -0.932585 -2.561658 0.206635  
 6 -2.144104 -2.081312 -0.051184  
 6 0.343487 -2.443401 0.221898  
 6 1.596337 -2.163399 0.516851  
 6 -3.221206 -1.465972 -0.044143  
 6 2.917018 2.396987 -0.160977  
 12 1.802739 0.730554 0.170215  
 6 -1.094332 1.720710 0.468519  
 6 -3.147686 1.687446 -0.110573  
 8 2.425339 -1.154870 0.147765  
 6 -0.229927 0.768497 0.378525  
 6 -3.952570 0.789558 -0.382999  
 8 -4.111495 -0.544060 -0.470645  
 12 4.206922 -0.937107 -0.561655  
 6 2.306264 3.444170 -0.071085  
 6 -2.211809 2.586721 0.241919

16  
 281.360609 Kcal/mol 12.200966 eV -100.935304 H Child\_7\_44.log  
 6 1.441054 -3.035287 0.050096  
 6 1.388902 3.008673 -0.742657  
 6 0.243558 -2.706215 -0.002210  
 6 0.473407 2.289655 -0.074144  
 6 -0.959238 -2.078714 -0.066779  
 12 3.008831 1.457120 0.001042  
 12 3.235000 -2.046722 -0.011423  
 6 -0.818511 1.768533 -0.138153  
 6 -1.905838 -1.304572 -0.126488  
 6 -4.841239 0.015105 1.360273  
 6 4.375169 -0.216009 0.018008  
 6 -4.079363 -0.020324 0.288521  
 6 -2.664045 -0.098030 -0.195062  
 6 -1.803389 1.051171 -0.171317  
 8 -3.866830 -0.052509 -1.110477  
 8 1.363233 1.931421 0.975982

16  
 282.382517 Kcal/mol 12.245280 eV -100.933675 H MutI\_3\_65.log  
 6 -1.939890 2.532644 0.000000  
 6 3.042493 1.512600 -0.000000  
 6 -1.284194 -1.798734 0.000000  
 12 -2.992092 -3.243978 0.000000  
 6 -0.575942 2.570728 0.000000  
 6 0.652090 2.446750 -0.000000  
 6 2.504599 -1.381459 -0.000000  
 8 0.000000 -1.524146 0.000000  
 6 1.236509 -1.482819 -0.000000  
 6 1.925878 2.006307 -0.000000  
 12 -3.216171 -0.425528 0.000000  
 6 4.037262 -1.993796 -0.000000  
 6 -3.027080 1.667397 0.000000  
 6 -3.281785 3.090413 0.000000  
 6 3.707163 -0.679981 -0.000000  
 8 4.064566 0.660870 -0.000000



283.161357 Kcal/mol 12.279054 eV -100.932434 H MutI\_2\_73.log

|    |           |           |           |
|----|-----------|-----------|-----------|
| 6  | 2.535262  | -0.494784 | 0.681954  |
| 6  | -0.475350 | -0.344668 | -0.616050 |
| 8  | 1.517742  | 3.966065  | -0.718982 |
| 8  | -3.963280 | 0.783044  | 1.787990  |
| 6  | 3.449040  | 0.648062  | 1.017592  |
| 6  | -0.891720 | -1.599367 | -0.731383 |
| 6  | 1.320829  | 2.857384  | -0.414436 |
| 6  | 1.118243  | 1.540534  | -0.149803 |
| 6  | 2.175579  | 0.801952  | 0.506751  |
| 6  | 2.681980  | -3.140468 | 0.481488  |
| 6  | -0.010414 | 0.872022  | -0.573481 |
| 12 | 1.153036  | -1.968073 | -0.748518 |
| 12 | -2.975156 | -1.128829 | -0.664448 |
| 6  | -4.577480 | 0.387797  | -0.608184 |
| 6  | 2.755071  | -1.848842 | 0.633905  |
| 6  | -3.176083 | 0.182038  | 1.172235  |

16

284.158760 Kcal/mol 12.322306 eV -100.930844 H Child\_6\_35.log

|    |           |           |           |
|----|-----------|-----------|-----------|
| 6  | 14.390954 | 1.159729  | 0.711470  |
| 12 | -0.666924 | -2.291381 | -0.350366 |
| 8  | 13.307159 | 1.278390  | 0.347784  |
| 8  | -1.628440 | -0.605329 | -0.376600 |
| 6  | -4.274903 | 5.033711  | 0.057728  |
| 6  | 0.883944  | -3.428840 | -1.171036 |
| 6  | -1.584918 | 0.670375  | -0.885831 |
| 6  | -3.822976 | 3.827832  | 0.088308  |
| 6  | -3.581762 | 1.203009  | 0.630310  |
| 6  | -2.900082 | -2.756435 | 1.900472  |
| 6  | -2.575599 | 1.528604  | -0.290234 |
| 6  | -3.439394 | 2.545469  | 0.137522  |
| 12 | -3.124101 | -0.838546 | 1.013645  |
| 6  | 1.692406  | -2.657388 | -1.779300 |
| 6  | -1.924461 | -3.045752 | 1.143869  |
| 6  | -0.852785 | 1.282127  | -1.831412 |

16

284.537731 Kcal/mol 12.338739 eV -100.930241 H MutD\_13\_72.log

|    |           |           |           |
|----|-----------|-----------|-----------|
| 12 | 0.838856  | 2.080773  | -0.422351 |
| 6  | -4.129779 | -0.368633 | -1.315969 |
| 6  | 3.173547  | -1.369575 | 0.403383  |
| 8  | 2.908623  | 2.280075  | -0.384799 |
| 6  | 1.352810  | -3.201489 | -0.080129 |
| 6  | -1.089422 | 1.459192  | -0.000661 |
| 6  | 2.614069  | 1.062295  | -0.066417 |
| 6  | -1.819636 | -0.140149 | 1.191734  |
| 6  | -3.505066 | -0.242190 | -0.137464 |
| 6  | -0.981173 | 0.062710  | -0.732791 |
| 12 | -0.028255 | -1.779445 | -0.643140 |
| 6  | -3.146699 | -0.300208 | 1.286252  |
| 6  | 3.243070  | -0.106283 | 0.318251  |
| 8  | -0.980550 | 1.020348  | 1.483246  |
| 6  | -2.217273 | 0.546000  | -0.466917 |
| 6  | 2.313586  | -2.404890 | 0.267114  |

16

288.829416 Kcal/mol 12.524845 eV -100.923401 H

Original3D\_16\_7.log

|    |           |           |           |
|----|-----------|-----------|-----------|
| 6  | 1.778637  | 0.299260  | -2.168008 |
| 6  | 1.793200  | 1.098652  | 0.019280  |
| 6  | 2.434929  | -0.058468 | 0.473710  |
| 6  | 1.273951  | 1.280595  | -1.289663 |
| 6  | 2.450579  | -0.187683 | 1.887673  |
| 6  | 2.922279  | -1.158180 | -0.529198 |
| 6  | 0.223623  | 2.276170  | -1.165346 |
| 6  | -6.381135 | -0.365267 | 0.347615  |
| 8  | -0.944221 | -1.723927 | -1.058531 |
| 8  | -5.295827 | -0.857557 | 0.216213  |
| 6  | -7.637716 | 0.132171  | 0.499709  |
| 6  | -1.386375 | -2.553184 | -0.397375 |
| 6  | -0.344634 | 2.955358  | -0.257868 |
| 6  | 2.481947  | -0.659200 | -1.698518 |
| 12 | 3.596610  | -2.004645 | 1.268347  |
| 12 | 0.758778  | 2.195522  | 1.432193  |

16

289.099056 Kcal/mol 12.536537 eV -100.922972 H

Child\_11\_53.log

|    |           |           |           |
|----|-----------|-----------|-----------|
| 6  | -0.802367 | -3.995941 | -0.309645 |
| 6  | -2.693369 | 4.870247  | -0.168692 |
| 12 | -2.519233 | -3.025982 | 0.097227  |
| 6  | 4.949537  | 2.298169  | 0.063381  |
| 6  | 0.384823  | -3.605220 | -0.379897 |
| 6  | 4.442769  | 0.938296  | -0.110219 |
| 6  | -0.591136 | 0.084062  | 0.424479  |
| 8  | -3.033505 | 3.762014  | -0.291237 |
| 6  | -1.865994 | -0.381667 | 0.500130  |
| 6  | 3.522179  | 2.153614  | 0.230518  |
| 6  | 0.631186  | 0.205718  | 0.287911  |
| 6  | 3.009262  | 0.792641  | 0.062644  |
| 12 | 1.771348  | -2.139997 | -0.290956 |
| 6  | 1.986643  | -0.057193 | 0.057688  |
| 6  | -2.910628 | -1.069554 | 0.515159  |
| 8  | -3.391847 | 2.312075  | -0.298261 |

16

289.390180 Kcal/mol 12.549162 eV -100.922508 H

MutI\_17\_77.log

|    |           |           |           |
|----|-----------|-----------|-----------|
| 8  | -3.319256 | 1.294598  | -0.587968 |
| 6  | 3.288081  | 0.971920  | 0.181092  |
| 6  | 1.232232  | 2.478896  | 0.031617  |
| 6  | -4.391809 | 1.344583  | -0.170580 |
| 6  | 0.195918  | 3.253149  | -0.051762 |
| 6  | 7.532344  | -1.904136 | 0.038755  |
| 8  | -0.067276 | -1.613090 | 0.079978  |
| 6  | -0.830963 | 4.042054  | -0.079589 |
| 6  | 2.252307  | 1.723769  | 0.120556  |
| 6  | -1.403269 | -1.761578 | -0.545191 |
| 6  | 6.444155  | -1.224894 | 0.157134  |
| 6  | 5.379229  | -0.488361 | 0.203395  |
| 6  | -0.372828 | -2.589768 | -1.031428 |
| 12 | -6.237606 | -0.963616 | 0.608424  |
| 12 | -3.334475 | -1.866384 | 0.188600  |
| 6  | 4.334141  | 0.239023  | 0.229272  |

16

|            |           |           |           |             |   |                 |
|------------|-----------|-----------|-----------|-------------|---|-----------------|
| 289.906409 | Kcal/mol  | 12.571548 | eV        | -100.921685 | H | Child_17_31.log |
| 6          | -6.757291 | -1.001521 | 0.317632  |             |   |                 |
| 8          | 4.320822  | -2.579352 | -0.693044 |             |   |                 |
| 6          | -5.542107 | -0.554043 | 0.126684  |             |   |                 |
| 6          | 3.758570  | -1.643549 | -0.274475 |             |   |                 |
| 8          | -4.345910 | -0.170892 | -0.067569 |             |   |                 |
| 12         | 3.189516  | 1.635903  | -0.358868 |             |   |                 |
| 12         | -2.564083 | 0.142155  | -0.210754 |             |   |                 |
| 6          | 3.182202  | -0.559233 | 0.158429  |             |   |                 |
| 6          | -0.512207 | 0.992995  | -1.033090 |             |   |                 |
| 6          | 0.034699  | -0.060096 | -0.391475 |             |   |                 |
| 6          | 1.785770  | 2.179132  | 1.469234  |             |   |                 |
| 6          | 0.787399  | -0.892545 | 0.573482  |             |   |                 |
| 6          | 1.683580  | 0.900982  | 1.301911  |             |   |                 |
| 6          | -0.827321 | 2.186177  | -1.433623 |             |   |                 |
| 6          | 1.871817  | -0.424846 | 0.834038  |             |   |                 |
| 6          | -0.682528 | -1.012576 | 0.504647  |             |   |                 |
| 16         |           |           |           |             |   |                 |
| 290.982286 | Kcal/mol  | 12.618202 | eV        | -100.919970 | H | MutD_5_78.log   |
| 6          | -1.995233 | -2.321054 | 1.131719  |             |   |                 |
| 6          | 9.058694  | 2.201276  | -1.459384 |             |   |                 |
| 6          | -0.518190 | -3.477884 | -0.629888 |             |   |                 |
| 6          | -2.742010 | 2.255417  | -0.288356 |             |   |                 |
| 8          | 3.055247  | -1.361229 | 1.218022  |             |   |                 |
| 6          | 8.900126  | 2.167807  | -0.159386 |             |   |                 |
| 12         | -5.262176 | 1.350524  | 0.149136  |             |   |                 |
| 6          | 8.795020  | 2.150463  | 1.130587  |             |   |                 |
| 12         | -2.901839 | -0.401609 | 1.159658  |             |   |                 |
| 6          | -1.323917 | -2.958226 | 0.262064  |             |   |                 |
| 6          | 1.085453  | -4.485389 | -2.397137 |             |   |                 |
| 8          | -4.037543 | 4.043907  | -1.294508 |             |   |                 |
| 6          | 0.282808  | -4.017064 | -1.472089 |             |   |                 |
| 6          | 2.044673  | -1.329742 | 1.753739  |             |   |                 |
| 6          | -2.088708 | 1.333595  | 0.275748  |             |   |                 |
| 6          | -3.860961 | 3.006067  | -0.663223 |             |   |                 |
| 16         |           |           |           |             |   |                 |
| 291.336504 | Kcal/mol  | 12.633562 | eV        | -100.919406 | H | Child_4_57.log  |
| 6          | -0.107915 | -1.729824 | 0.102586  |             |   |                 |
| 6          | -1.084687 | 3.297700  | -0.362688 |             |   |                 |
| 12         | -2.206605 | -1.331795 | -0.064427 |             |   |                 |
| 6          | -1.858703 | 2.033751  | -0.426482 |             |   |                 |
| 6          | 1.266042  | -1.556066 | 0.184312  |             |   |                 |
| 6          | -0.491484 | 1.881074  | -0.193190 |             |   |                 |
| 6          | -4.019934 | -0.403272 | -0.040911 |             |   |                 |
| 12         | 1.302326  | 0.941405  | 0.156528  |             |   |                 |
| 6          | 2.493532  | -1.283380 | 0.093814  |             |   |                 |
| 6          | 3.598461  | 1.001062  | 0.280324  |             |   |                 |
| 6          | -5.158801 | 0.145909  | 0.115593  |             |   |                 |
| 6          | -6.352827 | 0.742178  | 0.367700  |             |   |                 |
| 6          | 3.710078  | -0.644302 | -0.057040 |             |   |                 |
| 6          | 4.751473  | -1.227666 | -0.563661 |             |   |                 |
| 8          | 4.547259  | 1.741054  | 0.347758  |             |   |                 |
| 8          | -0.749767 | -2.848343 | -0.111176 |             |   |                 |
| 16         |           |           |           |             |   |                 |
| 291.402235 | Kcal/mol  | 12.636413 | eV        | -100.919301 | H | Child_14_8.log  |

|            |           |           |           |               |                 |
|------------|-----------|-----------|-----------|---------------|-----------------|
| 12         | -3.849985 | 1.296249  | 0.530441  |               |                 |
| 6          | 1.287787  | 3.661780  | -0.046580 |               |                 |
| 6          | -1.547528 | -2.086468 | -0.496862 |               |                 |
| 6          | 2.094487  | 2.676697  | -0.097897 |               |                 |
| 6          | -0.316302 | -1.480730 | -0.481162 |               |                 |
| 6          | 3.673824  | 0.733698  | -0.491226 |               |                 |
| 6          | -2.769656 | -1.956248 | -0.344827 |               |                 |
| 8          | 2.908509  | 1.668207  | -0.289177 |               |                 |
| 6          | 1.046552  | -1.070376 | -0.480368 |               |                 |
| 12         | 3.147179  | -1.516411 | -0.056954 |               |                 |
| 6          | -3.942416 | -1.302619 | -0.132679 |               |                 |
| 6          | -0.015217 | -0.146440 | -0.257051 |               |                 |
| 6          | -4.846174 | -0.483965 | 0.168347  |               |                 |
| 6          | -0.808484 | 0.942239  | 0.044429  |               |                 |
| 6          | -1.827205 | 1.585406  | 0.316964  |               |                 |
| 8          | 4.123447  | -2.142694 | 1.303130  |               |                 |
| 16         |           |           |           |               |                 |
| 292.654909 | Kcal/mol  | 12.690734 | eV        | -100.917305 H | Child_12_37.log |
| 8          | -4.778816 | 2.845036  | -0.788764 |               |                 |
| 12         | 5.294135  | 2.541587  | -0.461720 |               |                 |
| 6          | -3.750100 | 2.395770  | -0.333427 |               |                 |
| 6          | 5.183284  | 0.424346  | -0.004674 |               |                 |
| 6          | -1.359842 | 2.128177  | 0.885970  |               |                 |
| 6          | 4.039415  | -0.243085 | 0.110634  |               |                 |
| 6          | -2.666427 | 1.908792  | 0.184910  |               |                 |
| 6          | 2.978024  | -0.973807 | 0.248363  |               |                 |
| 6          | -1.839757 | 0.846813  | 0.612334  |               |                 |
| 12         | 1.120192  | -1.685498 | 0.741533  |               |                 |
| 6          | -1.659979 | -0.510532 | 0.751079  |               |                 |
| 6          | 0.187849  | -2.606773 | -1.216986 |               |                 |
| 8          | -0.907954 | -2.677185 | -1.568637 |               |                 |
| 6          | -0.772658 | -1.502244 | 0.891430  |               |                 |
| 6          | -3.412773 | -1.755425 | 0.108837  |               |                 |
| 6          | -2.173331 | -2.048013 | 0.345107  |               |                 |
| 16         |           |           |           |               |                 |
| 293.178836 | Kcal/mol  | 12.713454 | eV        | -100.916470 H | Child_18_17.log |
| 6          | 3.319489  | -3.402039 | -0.045353 |               |                 |
| 6          | -4.358364 | 0.792069  | -1.334709 |               |                 |
| 6          | 2.721917  | -2.246456 | -0.156351 |               |                 |
| 8          | -4.782453 | 3.606597  | 0.216096  |               |                 |
| 6          | 2.795099  | -0.726278 | -0.398182 |               |                 |
| 6          | -3.684904 | 3.935875  | 0.203291  |               |                 |
| 12         | 4.149080  | 0.759739  | -0.100465 |               |                 |
| 6          | -4.014597 | -0.132165 | -0.534904 |               |                 |
| 6          | 1.602878  | -1.316483 | -0.177794 |               |                 |
| 6          | -3.511104 | -1.182320 | 0.234001  |               |                 |
| 12         | 6.171298  | 2.887784  | 0.291152  |               |                 |
| 6          | 0.247546  | -1.250233 | -0.040262 |               |                 |
| 6          | -2.043889 | -1.321375 | 0.169424  |               |                 |
| 6          | -0.838812 | -0.452287 | -0.076160 |               |                 |
| 6          | -0.991357 | -2.145558 | 0.202418  |               |                 |
| 8          | -4.131040 | -1.992444 | 0.963809  |               |                 |
| 16         |           |           |           |               |                 |
| 293.790811 | Kcal/mol  | 12.739991 | eV        | -100.915495 H | Child_14_13.log |
| 8          | 7.768777  | -0.302701 | -0.042612 |               |                 |

|    |           |           |           |
|----|-----------|-----------|-----------|
| 6  | -5.153764 | -2.111209 | -0.001809 |
| 6  | 6.549440  | -0.263305 | -0.023218 |
| 6  | -3.976195 | 0.276345  | -0.002939 |
| 6  | 5.298760  | -0.227387 | -0.006185 |
| 6  | -4.378258 | -0.957203 | 0.002049  |
| 6  | 3.999442  | -0.180983 | 0.050906  |
| 6  | -3.388038 | 1.317916  | -0.006095 |
| 6  | 2.753481  | -0.204219 | 0.062178  |
| 6  | -2.353551 | 3.761222  | -0.007180 |
| 6  | 1.413532  | -0.296273 | 0.036429  |
| 6  | -2.598322 | 2.413859  | -0.009120 |
| 6  | 0.155842  | -0.353911 | 0.028037  |
| 12 | -2.468005 | -2.818276 | -0.016370 |
| 12 | -1.574231 | -0.360189 | -0.011760 |
| 8  | -0.447201 | 2.689260  | -0.007482 |

16

293.935299 Kcal/mol 12.746257 eV -100.915265 H

Original2D\_3\_2.log

|    |           |           |           |
|----|-----------|-----------|-----------|
| 6  | 1.612544  | 4.011911  | -0.000000 |
| 8  | -0.000000 | -1.346774 | 0.000000  |
| 6  | 0.701555  | 3.031589  | -0.000000 |
| 6  | -0.700953 | 1.511889  | -0.000000 |
| 6  | -1.520705 | 0.429321  | 0.000000  |
| 12 | 1.691788  | -0.272906 | -0.000000 |
| 6  | -1.303572 | -0.886959 | 0.000000  |
| 6  | 2.529501  | 4.913914  | -0.000000 |
| 6  | -1.823203 | 3.877372  | -0.000000 |
| 6  | 0.752774  | 1.580459  | -0.000000 |
| 12 | 0.513110  | -3.427323 | 0.000000  |
| 6  | -1.847605 | -3.126123 | 0.000000  |
| 6  | -0.832707 | 2.998712  | -0.000000 |
| 6  | 2.460680  | -2.381364 | 0.000000  |
| 8  | -2.289834 | -1.855572 | 0.000000  |
| 6  | -1.384996 | -4.290468 | 0.000000  |

16

293.995668 Kcal/mol 12.748875 eV -100.915168 H

MutD\_15\_52.log

|    |            |           |           |
|----|------------|-----------|-----------|
| 6  | 1.647861   | -0.961808 | 0.146950  |
| 8  | 4.018274   | -1.547506 | 0.596168  |
| 6  | -4.851702  | -0.216726 | -0.623707 |
| 6  | 8.227522   | 0.820570  | 0.168153  |
| 8  | 10.650195  | 0.577674  | -0.310478 |
| 6  | -11.038428 | 0.786599  | 0.916533  |
| 6  | 0.427939   | -0.719524 | -0.029385 |
| 6  | -3.561295  | -0.284221 | -0.522008 |
| 6  | 5.611673   | 0.868027  | 0.203297  |
| 6  | -6.146038  | -0.194652 | -0.708181 |
| 6  | 2.908529   | -1.246696 | 0.386748  |
| 12 | -1.583472  | -0.300642 | -0.281443 |
| 6  | 6.921840   | 0.823123  | 0.178690  |
| 6  | 9.477517   | 0.689810  | -0.126839 |
| 6  | -9.786821  | 0.816548  | 0.690646  |
| 12 | -8.114806  | 0.356671  | -0.249464 |

16

294.443721 Kcal/mol 12.768304 eV -100.914454 H

Child\_6\_28.log

|   |          |           |           |
|---|----------|-----------|-----------|
| 6 | 2.782360 | -2.231518 | -0.027521 |
|---|----------|-----------|-----------|

|            |           |           |           |             |                   |
|------------|-----------|-----------|-----------|-------------|-------------------|
| 12         | -3.025736 | 1.976905  | 0.140806  |             |                   |
| 6          | 1.719709  | -2.947101 | 0.006827  |             |                   |
| 6          | -1.284275 | 3.015838  | -0.183549 |             |                   |
| 6          | 3.757111  | -1.342818 | -0.076463 |             |                   |
| 6          | -0.020328 | 2.981538  | -0.195814 |             |                   |
| 6          | 4.681417  | -0.394952 | -0.128951 |             |                   |
| 6          | -4.134706 | 0.329695  | 0.300321  |             |                   |
| 12         | -0.289737 | -2.464360 | 0.184348  |             |                   |
| 6          | 1.253969  | 2.721949  | -0.163748 |             |                   |
| 6          | -2.337956 | -2.241571 | -0.288278 |             |                   |
| 6          | -3.762622 | -0.843282 | 0.037495  |             |                   |
| 6          | 2.450086  | 2.301201  | -0.045225 |             |                   |
| 8          | 0.214221  | -0.634937 | 0.446317  |             |                   |
| 8          | 3.584965  | 1.936169  | 0.091779  |             |                   |
| 6          | -3.539399 | -2.109043 | -0.602865 |             |                   |
| 16         |           |           |           |             |                   |
| 294.514396 | Kcal/mol  | 12.771369 | eV        | -100.914342 | H Child_3_10.log  |
| 8          | 2.849514  | -0.709126 | 2.958587  |             |                   |
| 8          | -8.074845 | 0.008432  | 0.361780  |             |                   |
| 6          | 2.862402  | -0.466754 | 1.804260  |             |                   |
| 6          | -6.913627 | 0.012500  | 0.223599  |             |                   |
| 12         | 3.476844  | 2.160585  | -0.171344 |             |                   |
| 12         | -4.853279 | 0.023347  | -0.025137 |             |                   |
| 6          | 3.244106  | -2.504275 | -0.730092 |             |                   |
| 6          | -2.909878 | 0.053139  | -0.277948 |             |                   |
| 6          | 3.061829  | -0.195110 | 0.530167  |             |                   |
| 6          | -1.690472 | 0.082616  | -0.476148 |             |                   |
| 6          | -0.362890 | 0.091862  | -0.689194 |             |                   |
| 6          | 3.001064  | -1.201115 | -0.608164 |             |                   |
| 6          | 0.844528  | 0.051770  | -0.870842 |             |                   |
| 6          | 3.175372  | -3.598471 | -1.418525 |             |                   |
| 6          | 2.245584  | -0.042709 | -0.807388 |             |                   |
| 6          | 3.161960  | 4.282941  | -0.713920 |             |                   |
| 16         |           |           |           |             |                   |
| 294.819665 | Kcal/mol  | 12.784607 | eV        | -100.913855 | H Child_11_49.log |
| 8          | -3.763108 | 0.639835  | -0.298220 |             |                   |
| 6          | 7.867475  | -1.252116 | 1.330133  |             |                   |
| 6          | -1.943726 | 1.614038  | -0.165486 |             |                   |
| 6          | 6.678206  | -0.887074 | 0.778609  |             |                   |
| 12         | -2.902184 | -1.543060 | -0.638692 |             |                   |
| 6          | -5.180802 | -0.681108 | 1.692952  |             |                   |
| 6          | -1.245554 | 2.636494  | -0.213509 |             |                   |
| 8          | -6.299332 | -0.716737 | 1.502727  |             |                   |
| 6          | 5.485942  | -0.581569 | 0.281792  |             |                   |
| 6          | 0.106397  | 2.758416  | -0.237550 |             |                   |
| 6          | 4.375827  | -0.182063 | -0.133099 |             |                   |
| 6          | -1.246147 | -2.501861 | -1.377390 |             |                   |
| 6          | -2.452798 | 0.366087  | 0.021561  |             |                   |
| 6          | 1.317014  | 2.457008  | -0.287113 |             |                   |
| 6          | 0.005195  | -2.446920 | -1.183185 |             |                   |
| 12         | 2.726963  | 0.944662  | -0.418170 |             |                   |
| 16         |           |           |           |             |                   |
| 295.082541 | Kcal/mol  | 12.796006 | eV        | -100.913436 | H MutI_17_45.log  |
| 6          | 2.358625  | 0.202353  | 1.121529  |             |                   |
| 6          | 1.145115  | -3.066319 | -0.555581 |             |                   |

|                                                               |           |           |           |
|---------------------------------------------------------------|-----------|-----------|-----------|
| 6                                                             | -2.255961 | 1.345874  | -0.188844 |
| 6                                                             | -0.047189 | 2.876498  | -0.899956 |
| 6                                                             | -0.972441 | 1.863784  | -0.412699 |
| 8                                                             | 0.848780  | -1.702801 | -0.105663 |
| 6                                                             | 1.547288  | -0.573804 | 0.234081  |
| 6                                                             | 0.364135  | 1.672153  | -0.229118 |
| 6                                                             | -3.490765 | 1.984545  | 0.235246  |
| 8                                                             | -2.245986 | -1.133969 | 0.022050  |
| 12                                                            | 8.101953  | 0.596772  | 0.082965  |
| 6                                                             | -5.329848 | -0.015338 | 0.534539  |
| 12                                                            | -1.031632 | -2.485175 | -0.224760 |
| 6                                                             | 1.294442  | 0.750064  | 0.214373  |
| 6                                                             | -2.759082 | 0.037792  | 0.017257  |
| 6                                                             | -4.132021 | 0.481563  | 0.324250  |
| 16                                                            |           |           |           |
| 295.191128 Kcal/mol 12.800715 eV -100.913263 H MutI_14_45.log |           |           |           |
| 8                                                             | 1.671341  | -2.658250 | -0.598101 |
| 6                                                             | -8.007878 | 0.396826  | -0.034266 |
| 6                                                             | -0.391173 | -0.623622 | 0.197627  |
| 6                                                             | 0.885710  | -0.565185 | 0.336051  |
| 6                                                             | -6.782160 | 0.251490  | 0.022582  |
| 6                                                             | 3.924949  | -2.051565 | -0.102573 |
| 6                                                             | 2.944920  | -2.677622 | -0.730543 |
| 6                                                             | -4.234277 | -0.099419 | 0.111525  |
| 6                                                             | -1.619871 | -0.536815 | 0.171863  |
| 6                                                             | 4.033747  | -0.894481 | 0.405622  |
| 6                                                             | -5.440100 | 0.069580  | 0.078487  |
| 6                                                             | 3.501301  | 0.301147  | 0.805357  |
| 12                                                            | 3.276942  | 2.404445  | 0.930905  |
| 6                                                             | 2.101100  | 0.060620  | 0.444060  |
| 8                                                             | -2.908746 | -0.313541 | 0.146741  |
| 12                                                            | 2.089860  | 2.761272  | -1.482894 |
| 16                                                            |           |           |           |
| 296.962766 Kcal/mol 12.877541 eV -100.910440 H                |           |           |           |
| Original3D_0_63.log                                           |           |           |           |
| 6                                                             | 0.426353  | -1.829759 | 0.194632  |
| 6                                                             | 2.215629  | -1.443803 | -0.315564 |
| 6                                                             | 0.391744  | -1.326653 | -1.335243 |
| 12                                                            | -1.261591 | -0.128450 | -1.573245 |
| 6                                                             | 0.900107  | -0.942766 | 1.329782  |
| 8                                                             | -3.355223 | -1.073239 | 0.666981  |
| 6                                                             | -4.407260 | -0.801674 | 1.070604  |
| 6                                                             | 1.730751  | -0.847241 | -1.540416 |
| 6                                                             | -0.148110 | 2.636639  | 0.214608  |
| 6                                                             | -1.542596 | 2.482314  | -0.044578 |
| 6                                                             | 2.219729  | -0.537239 | 0.746755  |
| 8                                                             | -1.793694 | 1.515832  | -0.937084 |
| 6                                                             | 1.066017  | 2.846665  | 0.456357  |
| 6                                                             | 0.376678  | -0.541984 | 2.473770  |
| 6                                                             | 1.056840  | -2.966323 | -0.223599 |
| 12                                                            | 2.551261  | 1.469301  | 0.239760  |
| 16                                                            |           |           |           |
| 299.284919 Kcal/mol 12.978239 eV -100.906739 H                |           |           |           |
| Original1D_18_0.log                                           |           |           |           |
| 6                                                             | 0.000000  | 0.000000  | 1.750737  |

|            |           |           |            |                              |
|------------|-----------|-----------|------------|------------------------------|
| 6          | 0.000000  | 0.000000  | 2.996238   |                              |
| 12         | 0.000000  | 0.000000  | 4.987441   |                              |
| 8          | 0.000000  | 0.000000  | 6.809044   |                              |
| 8          | 0.000000  | 0.000000  | 8.177263   |                              |
| 6          | 0.000000  | 0.000000  | 9.447611   |                              |
| 6          | 0.000000  | 0.000000  | 10.760043  |                              |
| 12         | 0.000000  | 0.000000  | -0.275429  |                              |
| 6          | 0.000000  | 0.000000  | -2.304236  |                              |
| 6          | 0.000000  | 0.000000  | -3.551983  |                              |
| 6          | 0.000000  | 0.000000  | -4.886895  |                              |
| 6          | 0.000000  | 0.000000  | -6.134114  |                              |
| 6          | 0.000000  | 0.000000  | -7.448170  |                              |
| 6          | 0.000000  | 0.000000  | -8.706679  |                              |
| 6          | 0.000000  | 0.000000  | -10.016670 |                              |
| 6          | 0.000000  | 0.000000  | -11.311650 |                              |
| 16         |           |           |            |                              |
| 300.460724 | Kcal/mol  | 13.029227 | eV         | -100.904866 H MutI_12_73.log |
| 6          | -2.188161 | -2.610791 | -0.437559  |                              |
| 12         | -4.438328 | 1.408368  | -0.437902  |                              |
| 6          | -2.951860 | -1.400030 | -0.287164  |                              |
| 12         | 1.593659  | -0.978693 | 0.586077   |                              |
| 6          | 0.781850  | 4.414834  | 0.019189   |                              |
| 6          | 3.318793  | -0.102428 | -0.153935  |                              |
| 6          | -2.556833 | 1.119809  | 0.653815   |                              |
| 6          | 2.513154  | 0.995116  | 0.059193   |                              |
| 6          | -4.067686 | -0.729548 | -0.612367  |                              |
| 6          | -0.020090 | -2.283438 | 0.877759   |                              |
| 8          | -1.068300 | -2.418241 | 0.256739   |                              |
| 6          | -2.641711 | -0.100451 | 0.337751   |                              |
| 6          | 4.478761  | -0.583908 | -0.496453  |                              |
| 6          | 1.913913  | 2.094702  | 0.146201   |                              |
| 8          | 5.443938  | -1.271730 | -0.694978  |                              |
| 6          | 1.275025  | 3.246742  | 0.181540   |                              |
| 16         |           |           |            |                              |
| 300.478954 | Kcal/mol  | 13.030017 | eV         | -100.904837 H Child_8_55.log |
| 12         | 2.177708  | -0.605386 | 0.177233   |                              |
| 6          | -6.136904 | 3.143879  | 1.412828   |                              |
| 12         | 5.080557  | -1.456410 | 0.767418   |                              |
| 6          | -5.611379 | 2.248306  | 0.637199   |                              |
| 6          | 0.239903  | -1.375480 | -0.080844  |                              |
| 6          | -5.031804 | 1.423897  | -0.160753  |                              |
| 6          | -1.017531 | -1.921386 | 0.108943   |                              |
| 6          | -4.445425 | 0.596828  | -0.955055  |                              |
| 6          | 4.014365  | 0.303330  | 0.246922   |                              |
| 6          | -3.862287 | -0.251697 | -1.743348  |                              |
| 6          | 4.430543  | 1.485210  | -0.019025  |                              |
| 6          | 5.158831  | 3.879048  | -0.724597  |                              |
| 6          | -2.285943 | -2.040974 | 0.366093   |                              |
| 6          | 4.851493  | 2.694238  | -0.330516  |                              |
| 8          | -3.412087 | -2.287773 | 0.664101   |                              |
| 8          | -0.203208 | -2.258432 | -1.149463  |                              |
| 16         |           |           |            |                              |
| 300.546918 | Kcal/mol  | 13.032964 | eV         | -100.904728 H MutI_14_53.log |
| 12         | 3.071680  | 2.270656  | -1.405323  |                              |
| 6          | -4.037841 | 1.466347  | 0.601275   |                              |



|            |           |           |           |                              |
|------------|-----------|-----------|-----------|------------------------------|
| 6          | 1.405336  | -0.628660 | -0.405981 |                              |
| 8          | 4.444295  | 1.358791  | -0.190881 |                              |
| 6          | -3.995480 | 2.697401  | 0.994462  |                              |
| 6          | 0.241010  | -0.991757 | -0.844029 |                              |
| 6          | -3.935511 | -2.156412 | -0.652143 |                              |
| 6          | -4.050972 | 0.251736  | 0.214765  |                              |
| 6          | -3.857975 | 3.907692  | 1.426231  |                              |
| 6          | 3.581455  | 0.419947  | 0.100170  |                              |
| 6          | 2.302416  | 0.415008  | -0.549223 |                              |
| 12         | 2.926783  | -1.345064 | 1.130235  |                              |
| 8          | -0.823402 | -1.437850 | -1.208569 |                              |
| 6          | 3.220823  | -2.802274 | 2.790375  |                              |
| 6          | -3.996880 | -0.955704 | -0.198001 |                              |
| 6          | -3.701164 | -3.369097 | -1.061794 |                              |
| 16         |           |           |           |                              |
| 300.679454 | Kcal/mol  | 13.038712 | eV        | -100.904517 H Child_1_46.log |
| 12         | -3.834241 | 0.936322  | -0.595612 |                              |
| 6          | 9.718583  | 0.534425  | 0.775407  |                              |
| 6          | -3.462106 | -1.333135 | -1.085561 |                              |
| 8          | -1.711912 | -2.427631 | 3.430032  |                              |
| 6          | 0.631373  | -2.073196 | -2.367480 |                              |
| 6          | -3.436745 | 3.205303  | 0.709008  |                              |
| 12         | -1.309525 | -1.157948 | -1.677324 |                              |
| 6          | 1.173951  | -1.344069 | -1.472922 |                              |
| 8          | 8.994768  | 0.683511  | -0.107113 |                              |
| 6          | 0.438868  | 0.394302  | 0.007707  |                              |
| 6          | -1.302185 | -2.652881 | 2.375939  |                              |
| 6          | 1.325480  | -0.271036 | -0.657086 |                              |
| 6          | -2.353259 | 2.550343  | 0.572965  |                              |
| 6          | -1.155609 | 1.831248  | 0.428071  |                              |
| 6          | -0.010033 | 1.286447  | 1.168241  |                              |
| 6          | -0.991262 | 0.640996  | -0.338978 |                              |
| 16         |           |           |           |                              |
| 300.746657 | Kcal/mol  | 13.041626 | eV        | -100.904410 H MutI_11_75.log |
| 6          | -1.244086 | -2.041248 | 0.582279  |                              |
| 6          | -5.539297 | 0.267289  | 0.292866  |                              |
| 6          | -2.221267 | 0.931342  | -0.614523 |                              |
| 6          | 6.263257  | 2.031147  | 0.610462  |                              |
| 6          | 5.541565  | -0.076013 | -0.697305 |                              |
| 6          | -3.353176 | 1.464849  | -0.539487 |                              |
| 12         | -3.194330 | -1.392070 | 0.739170  |                              |
| 6          | -0.031569 | -2.105361 | 0.215356  |                              |
| 8          | 5.531890  | -1.416603 | -0.464241 |                              |
| 8          | -5.667603 | 1.507282  | -0.230466 |                              |
| 6          | -5.150197 | -0.814372 | 0.757223  |                              |
| 12         | -0.528114 | -0.303367 | -0.642663 |                              |
| 6          | -4.549648 | 2.195529  | -0.670670 |                              |
| 6          | 5.367058  | -2.601017 | -0.453637 |                              |
| 6          | 6.604048  | 3.116269  | 1.205272  |                              |
| 6          | 5.939152  | 0.901555  | 0.045426  |                              |
| 16         |           |           |           |                              |
| 302.631255 | Kcal/mol  | 13.123350 | eV        | -100.901407 H MutI_14_47.log |
| 6          | 1.587238  | -2.796296 | -0.160616 |                              |
| 6          | 3.102010  | -1.281214 | -0.703713 |                              |
| 6          | -1.067413 | -1.126565 | 0.716320  |                              |

|            |           |           |           |                               |
|------------|-----------|-----------|-----------|-------------------------------|
| 6          | 0.540038  | -2.718304 | 0.420353  |                               |
| 6          | 1.599187  | 1.939014  | 0.251366  |                               |
| 12         | -0.442520 | 1.707444  | 0.640664  |                               |
| 6          | 3.659519  | 3.695933  | -0.163005 |                               |
| 6          | -5.430762 | 0.274311  | -1.250138 |                               |
| 6          | 2.940976  | 2.611620  | -0.041393 |                               |
| 8          | -0.676901 | -2.376970 | 0.925845  |                               |
| 12         | -3.705580 | 0.179805  | -0.171808 |                               |
| 8          | 2.804021  | -2.597068 | -0.722059 |                               |
| 6          | -5.534975 | 1.189606  | -0.342937 |                               |
| 6          | 3.035586  | -0.100263 | -0.416071 |                               |
| 6          | 2.632441  | 1.188287  | -0.125874 |                               |
| 6          | -1.603807 | -0.018578 | 0.606282  |                               |
| 16         |           |           |           |                               |
| 303.475475 | Kcal/mol  | 13.159959 | eV        | -100.900061 H MutI_13_41.log  |
| 8          | 1.050789  | 3.022158  | 0.143120  |                               |
| 6          | -2.676508 | -2.333813 | 0.500708  |                               |
| 6          | -2.455475 | 0.936037  | -0.607068 |                               |
| 6          | 3.224959  | -2.239021 | -0.349485 |                               |
| 6          | -3.434302 | -1.206424 | 0.421385  |                               |
| 6          | -2.419245 | -0.317240 | -0.246561 |                               |
| 8          | 3.248657  | -3.304621 | -0.796380 |                               |
| 6          | 4.333268  | 1.403714  | 0.988147  |                               |
| 12         | -5.420713 | -0.828823 | 0.882349  |                               |
| 6          | -0.267887 | -1.803232 | -0.577462 |                               |
| 6          | -2.797595 | 3.448254  | -1.157754 |                               |
| 6          | 3.212700  | 1.901877  | 0.609358  |                               |
| 6          | -2.611844 | 2.189729  | -0.887956 |                               |
| 6          | 2.084211  | 2.496121  | 0.360931  |                               |
| 6          | -1.477857 | -1.443313 | -0.249722 |                               |
| 12         | 5.197203  | -0.499213 | 0.150897  |                               |
| 16         |           |           |           |                               |
| 304.145713 | Kcal/mol  | 13.189023 | eV        | -100.898993 H MutI_16_67.log  |
| 6          | -2.190764 | -2.344511 | 0.867568  |                               |
| 8          | -0.742913 | 0.166471  | -0.015697 |                               |
| 6          | -3.630832 | -1.376863 | -1.172594 |                               |
| 6          | -3.087514 | 0.118346  | -1.066527 |                               |
| 6          | -1.830220 | -0.450054 | -0.688613 |                               |
| 6          | 5.699585  | -0.334317 | -0.627896 |                               |
| 6          | 1.720940  | -0.561320 | 0.074715  |                               |
| 6          | 0.525053  | -0.233209 | -0.091224 |                               |
| 8          | -1.391293 | 6.747401  | 0.764507  |                               |
| 6          | -0.674710 | 7.139774  | -0.058993 |                               |
| 12         | 3.787133  | -0.237138 | -0.202265 |                               |
| 6          | -4.584888 | -2.021904 | -1.817262 |                               |
| 6          | -2.488671 | -1.625893 | -0.283963 |                               |
| 6          | 6.807087  | -0.721562 | -1.124689 |                               |
| 12         | 0.276909  | -1.783986 | 1.767650  |                               |
| 6          | -1.547544 | -2.764734 | 1.860295  |                               |
| 16         |           |           |           |                               |
| 305.175939 | Kcal/mol  | 13.233698 | eV        | -100.897351 H Child_14_11.log |
| 6          | 6.934132  | -1.402006 | -0.162297 |                               |
| 8          | -6.602079 | -1.133372 | 0.234193  |                               |
| 6          | 5.849461  | -0.757897 | 0.087748  |                               |
| 6          | -5.409764 | -1.083977 | 0.225413  |                               |

|                                                |           |           |           |                 |
|------------------------------------------------|-----------|-----------|-----------|-----------------|
| 6                                              | 4.677851  | -0.175806 | 0.250333  |                 |
| 6                                              | -4.145528 | -0.678393 | 0.098984  |                 |
| 6                                              | 3.510808  | 0.319416  | 0.378799  |                 |
| 8                                              | -2.935880 | -1.246161 | 0.204148  |                 |
| 12                                             | 1.970065  | -1.302887 | 0.005042  |                 |
| 12                                             | -2.528943 | 0.678890  | -0.203003 |                 |
| 6                                              | 2.280910  | 0.929089  | 0.400454  |                 |
| 6                                              | -1.153992 | 2.216531  | -0.289133 |                 |
| 6                                              | 0.427158  | -2.630783 | -0.973859 |                 |
| 6                                              | -0.666579 | 3.533196  | -0.474596 |                 |
| 6                                              | 1.318847  | 1.743827  | 0.316605  |                 |
| 6                                              | 0.211732  | 2.407508  | -0.046984 |                 |
| 16                                             |           |           |           |                 |
| 305.256191 Kcal/mol 13.237178 eV -100.897224 H |           |           |           | Child_11_31.log |
| 6                                              | 10.726381 | -1.078553 | -1.066512 |                 |
| 6                                              | 0.780180  | 0.998463  | 0.028322  |                 |
| 6                                              | -3.379573 | -2.317176 | -0.008047 |                 |
| 6                                              | 1.816201  | 1.721160  | 0.240349  |                 |
| 6                                              | -3.490345 | -1.173090 | -0.578289 |                 |
| 6                                              | -2.528408 | 2.240321  | 0.559019  |                 |
| 6                                              | 9.844847  | -0.694413 | -0.183702 |                 |
| 6                                              | -3.661744 | 2.542790  | 0.060710  |                 |
| 6                                              | -3.211631 | -3.510014 | 0.536531  |                 |
| 6                                              | 2.916260  | 2.365505  | 0.546636  |                 |
| 6                                              | 8.933708  | -0.307050 | 0.659902  |                 |
| 12                                             | -1.179122 | 0.055662  | 0.057834  |                 |
| 6                                              | -2.558271 | -4.529082 | 0.996658  |                 |
| 8                                              | -2.569987 | -0.258669 | -1.203989 |                 |
| 12                                             | -4.261330 | 0.809297  | -0.832638 |                 |
| 8                                              | -1.410039 | 1.767085  | 1.022510  |                 |
| 16                                             |           |           |           |                 |
| 306.833390 Kcal/mol 13.305572 eV -100.894710 H |           |           |           | Child_2_57.log  |
| 6                                              | 7.423518  | -0.493312 | 0.456386  |                 |
| 8                                              | -5.382715 | 1.274971  | -0.167381 |                 |
| 12                                             | 5.441233  | -0.175372 | -0.274249 |                 |
| 6                                              | -0.526320 | 1.949130  | 0.207455  |                 |
| 6                                              | 3.220356  | -0.362805 | -0.834007 |                 |
| 6                                              | -1.345105 | 0.999393  | 0.138164  |                 |
| 8                                              | 2.142541  | -0.652991 | -1.120754 |                 |
| 6                                              | -4.423314 | 0.585906  | -0.231952 |                 |
| 6                                              | 0.988457  | -1.780189 | 1.411936  |                 |
| 6                                              | 0.343416  | 2.953000  | 0.250996  |                 |
| 6                                              | -0.188219 | -1.630962 | 0.898804  |                 |
| 6                                              | 1.224037  | 3.905497  | 0.315479  |                 |
| 6                                              | -2.046584 | -0.160442 | 0.065255  |                 |
| 6                                              | -1.381044 | -1.457897 | 0.331583  |                 |
| 6                                              | -3.447973 | -0.281941 | -0.251917 |                 |
| 12                                             | -3.201731 | -2.351971 | -0.246086 |                 |
| 16                                             |           |           |           |                 |
| 307.259242 Kcal/mol 13.324039 eV -100.894031 H |           |           |           |                 |
| Original2D_0_8.log                             |           |           |           |                 |
| 6                                              | -0.000000 | -0.600357 | 0.000000  |                 |
| 6                                              | 3.925781  | -0.120189 | 0.000000  |                 |
| 6                                              | -0.118769 | 0.805145  | -0.000000 |                 |
| 6                                              | 0.014394  | -1.864613 | 0.000000  |                 |

|            |           |           |           |                               |
|------------|-----------|-----------|-----------|-------------------------------|
| 8          | -3.010251 | -0.361825 | -0.000000 |                               |
| 12         | 2.335247  | -1.255399 | 0.000000  |                               |
| 6          | 3.935430  | 1.138759  | 0.000000  |                               |
| 6          | -1.501415 | 1.360510  | -0.000000 |                               |
| 6          | 3.835276  | 2.474754  | 0.000000  |                               |
| 6          | -3.610369 | -1.521712 | -0.000000 |                               |
| 8          | 0.796382  | 1.686073  | -0.000000 |                               |
| 6          | -1.555264 | 2.725251  | -0.000000 |                               |
| 12         | -1.704571 | -2.802806 | -0.000000 |                               |
| 6          | 3.539162  | 3.727468  | 0.000000  |                               |
| 6          | -2.943103 | 1.012904  | -0.000000 |                               |
| 6          | -3.830650 | -2.787174 | -0.000000 |                               |
| 16         |           |           |           |                               |
| 311.820384 | Kcal/mol  | 13.521829 | eV        | -100.886763 H MutI_8_69.log   |
| 12         | 2.489441  | -1.966182 | 0.522376  |                               |
| 6          | 1.377905  | 2.115841  | -0.143818 |                               |
| 6          | 0.088158  | 1.727766  | 0.188693  |                               |
| 6          | -2.548722 | -0.514110 | -1.048413 |                               |
| 6          | 3.972469  | -0.451468 | -0.319783 |                               |
| 6          | -1.620947 | -0.023208 | -0.160041 |                               |
| 6          | 0.401771  | -3.267866 | 0.320202  |                               |
| 6          | 0.622750  | -0.725093 | 0.457095  |                               |
| 6          | -0.246957 | 0.250684  | 0.137817  |                               |
| 8          | -0.211322 | -2.185593 | 0.376488  |                               |
| 12         | -4.546849 | -0.867149 | -0.545564 |                               |
| 6          | -2.917900 | 0.223667  | 0.227706  |                               |
| 6          | 2.488667  | 2.660494  | -0.561604 |                               |
| 6          | -0.933036 | 2.549503  | 0.548987  |                               |
| 8          | 4.155150  | 0.536122  | -0.868453 |                               |
| 6          | -1.827778 | 3.319746  | 1.055490  |                               |
| 16         |           |           |           |                               |
| 314.888967 | Kcal/mol  | 13.654895 | eV        | -100.881873 H Child_4_33.log  |
| 6          | 1.494957  | -3.229516 | -0.491824 |                               |
| 12         | -7.576122 | -1.014152 | -0.824428 |                               |
| 6          | 1.489939  | -2.683839 | 0.649890  |                               |
| 6          | -2.604172 | 0.207556  | 2.325952  |                               |
| 12         | 2.229505  | -1.549191 | -1.509346 |                               |
| 6          | -1.715186 | 0.963526  | 1.665848  |                               |
| 6          | 1.726873  | -1.579466 | 1.471744  |                               |
| 6          | 1.551566  | 4.164731  | -0.951832 |                               |
| 8          | 2.892941  | -0.261073 | -0.218407 |                               |
| 6          | -0.836598 | 1.636968  | 0.927320  |                               |
| 6          | 2.393385  | -0.482246 | 0.970482  |                               |
| 6          | 0.721504  | 3.264183  | -0.421848 |                               |
| 6          | 0.684665  | 0.223626  | -2.079549 |                               |
| 6          | -0.015620 | 2.287460  | 0.107615  |                               |
| 6          | 1.545039  | -0.261292 | 2.123979  |                               |
| 8          | 0.299720  | 0.722320  | -1.004265 |                               |
| 16         |           |           |           |                               |
| 315.818386 | Kcal/mol  | 13.695199 | eV        | -100.880392 H Child_12_11.log |
| 6          | 5.313310  | -0.492859 | -0.869234 |                               |
| 6          | -2.623992 | -2.289815 | -0.604708 |                               |
| 8          | 3.791997  | 1.373038  | -0.193834 |                               |
| 6          | -4.037990 | -0.301040 | -0.238713 |                               |
| 6          | 4.214025  | -0.021736 | -0.280602 |                               |

|    |           |           |           |
|----|-----------|-----------|-----------|
| 6  | -4.730219 | 0.740270  | -0.102300 |
| 6  | 2.517223  | 0.903548  | 0.331533  |
| 8  | -3.164120 | -1.240885 | 0.157120  |
| 6  | 2.911519  | -0.432898 | 0.295642  |
| 6  | -1.416411 | -2.577812 | -0.015388 |
| 12 | 0.632075  | 1.913758  | 0.389180  |
| 12 | -3.030149 | 1.923594  | -0.146668 |
| 6  | 2.108250  | -1.548687 | 0.388882  |
| 6  | -0.197398 | -2.583376 | 0.231966  |
| 6  | 1.070345  | -2.223111 | 0.462740  |
| 6  | -1.169685 | 2.976609  | -0.035891 |

16

317.613424 Kcal/mol 13.773039 eV -100.877531 H

Original2D\_1\_1.log

|    |           |           |           |
|----|-----------|-----------|-----------|
| 12 | -1.105732 | 2.198597  | 0.000000  |
| 6  | 0.709250  | 0.468197  | -0.000000 |
| 6  | 0.000000  | -0.719619 | -0.000000 |
| 6  | -1.423704 | -0.498769 | 0.000000  |
| 6  | 0.362060  | -2.127163 | -0.000000 |
| 6  | -0.863118 | -2.816908 | -0.000000 |
| 8  | 4.403822  | -0.237376 | -0.000000 |
| 6  | 3.772440  | -1.264958 | -0.000000 |
| 6  | -1.958402 | -2.461614 | -0.000000 |
| 6  | 1.641590  | -2.511814 | -0.000000 |
| 6  | -2.286278 | 0.362946  | 0.000000  |
| 6  | 0.381882  | 5.148162  | 0.000000  |
| 8  | -0.534434 | 4.446362  | 0.000000  |
| 6  | 2.882327  | -2.235325 | -0.000000 |
| 6  | 0.942529  | 1.671016  | 0.000000  |
| 12 | -3.554148 | -1.511664 | 0.000000  |

16

317.720142 Kcal/mol 13.777667 eV -100.877361 H

MutI\_13\_61.log

|    |           |           |           |
|----|-----------|-----------|-----------|
| 6  | 4.610661  | -1.303800 | 0.593303  |
| 12 | -1.494679 | -1.457204 | -1.118140 |
| 6  | -2.449611 | -3.359289 | -0.715801 |
| 6  | -2.941088 | -2.015058 | 1.459473  |
| 6  | -2.873533 | -2.875021 | 0.400257  |
| 6  | 3.585632  | -0.570351 | 0.910105  |
| 6  | -0.109976 | -0.167819 | -1.765416 |
| 6  | 1.681343  | 1.619795  | -1.845672 |
| 12 | -0.925397 | 4.583909  | 0.387071  |
| 6  | -1.463405 | 1.433374  | 0.551070  |
| 6  | -1.999776 | 0.195231  | 0.624397  |
| 8  | 0.798178  | 0.748228  | -1.742607 |
| 6  | -0.819360 | 2.518477  | 0.444367  |
| 6  | -2.576518 | -0.771950 | 1.295705  |
| 8  | 2.632794  | 0.055445  | 1.185302  |
| 6  | 5.621153  | -2.028562 | 0.253423  |

16

318.911191 Kcal/mol 13.829316 eV -100.875463 H

Child\_12\_24.log

|    |           |           |           |
|----|-----------|-----------|-----------|
| 6  | 7.734623  | -0.136773 | 0.075327  |
| 12 | -7.807603 | -1.917286 | -1.050046 |
| 6  | 6.902057  | -0.222390 | -0.901414 |
| 8  | -4.418298 | 0.493489  | 1.614819  |
| 12 | 5.086270  | -0.827677 | -0.361445 |

|            |           |           |           |                              |
|------------|-----------|-----------|-----------|------------------------------|
| 6          | -3.802169 | 1.209425  | 0.883466  |                              |
| 8          | 2.391348  | 1.890634  | 0.302856  |                              |
| 6          | -3.130209 | 1.941938  | 0.067903  |                              |
| 6          | 1.714883  | 2.548323  | 0.964247  |                              |
| 6          | -2.451670 | 2.692720  | -0.736726 |                              |
| 6          | 1.869821  | -1.680595 | 0.109314  |                              |
| 6          | 0.582184  | -1.848855 | 0.273249  |                              |
| 6          | -1.735112 | 3.428747  | -1.561461 |                              |
| 6          | -0.676227 | -2.012300 | 0.453463  |                              |
| 6          | 3.108334  | -1.465867 | 0.014028  |                              |
| 6          | -1.971248 | -2.143278 | 0.624684  |                              |
| 16         |           |           |           |                              |
| 321.222707 | Kcal/mol  | 13.929553 | eV        | -100.871779 H MutI_3_73.log  |
| 6          | 3.068364  | 0.134686  | -0.333468 |                              |
| 6          | -3.953716 | 0.842563  | 0.825605  |                              |
| 6          | 3.536245  | -1.113950 | -0.272218 |                              |
| 6          | 3.642985  | -2.388621 | -0.217053 |                              |
| 6          | 3.237141  | 1.625254  | -0.010272 |                              |
| 12         | -1.616499 | -1.690645 | -0.779967 |                              |
| 6          | 0.104764  | -2.201987 | 1.002381  |                              |
| 8          | 0.858528  | -1.781328 | 1.751834  |                              |
| 6          | 4.045912  | 2.554239  | 0.436059  |                              |
| 6          | -0.416677 | 0.060014  | -0.816889 |                              |
| 6          | 2.017346  | 0.975586  | -0.514846 |                              |
| 12         | -2.304480 | 2.136029  | 0.476819  |                              |
| 6          | 0.671940  | 0.948096  | -0.642665 |                              |
| 8          | -3.734101 | -0.150661 | 0.019373  |                              |
| 6          | -0.652605 | 1.408005  | -0.434621 |                              |
| 6          | -3.625644 | -1.158665 | -0.777328 |                              |
| 16         |           |           |           |                              |
| 321.589367 | Kcal/mol  | 13.945452 | eV        | -100.871195 H Child_1_23.log |
| 6          | 9.080129  | -1.690588 | 1.512574  |                              |
| 6          | 0.692376  | 3.316501  | 0.438189  |                              |
| 8          | 8.991913  | -2.034668 | 0.439201  |                              |
| 6          | -0.175273 | 2.479377  | 0.846800  |                              |
| 12         | -3.075810 | -2.641364 | -0.886955 |                              |
| 6          | -1.073780 | 1.456386  | 0.687562  |                              |
| 6          | -3.836160 | -1.311806 | 0.654523  |                              |
| 12         | 1.326281  | 1.801205  | -0.936335 |                              |
| 6          | -3.164480 | -0.134148 | 0.924162  |                              |
| 8          | -0.185699 | 0.502791  | -0.533662 |                              |
| 6          | -1.323667 | -1.680324 | -1.235801 |                              |
| 6          | 2.925808  | 2.029807  | -2.480662 |                              |
| 6          | -0.733461 | -0.623586 | -0.936781 |                              |
| 6          | -2.249237 | 0.915902  | 1.032590  |                              |
| 6          | -3.448855 | 0.955305  | 1.794928  |                              |
| 6          | -4.935963 | -1.990003 | 0.534442  |                              |
| 16         |           |           |           |                              |
| 327.749516 | Kcal/mol  | 14.212582 | eV        | -100.861378 H MutI_6_69.log  |
| 6          | -0.898164 | -0.787955 | 0.248478  |                              |
| 6          | 2.676952  | 0.387436  | -0.060452 |                              |
| 6          | 3.546658  | -0.779393 | -0.062811 |                              |
| 6          | -2.310599 | -0.759956 | 0.172275  |                              |
| 6          | -0.881974 | 2.771210  | 0.090467  |                              |
| 6          | 2.126937  | 1.557825  | -0.113517 |                              |

|                                                |           |           |           |                 |
|------------------------------------------------|-----------|-----------|-----------|-----------------|
| 6                                              | 2.976688  | -2.110596 | -0.028262 |                 |
| 6                                              | 2.869290  | -3.360616 | -0.045330 |                 |
| 6                                              | 1.516552  | 2.729891  | -0.149915 |                 |
| 6                                              | -1.479999 | 1.741768  | 0.194205  |                 |
| 6                                              | -1.639148 | 0.413296  | 0.288519  |                 |
| 12                                             | -4.208037 | -0.837388 | -0.070108 |                 |
| 8                                              | 0.275589  | 3.399720  | -0.110523 |                 |
| 8                                              | -5.790520 | -1.394411 | -0.266004 |                 |
| 6                                              | 4.898029  | -0.622090 | -0.054601 |                 |
| 12                                             | 1.184048  | -1.089894 | 0.081598  |                 |
| 16                                             |           |           |           |                 |
| 327.874268 Kcal/mol 14.217992 eV -100.861179 H |           |           |           | Child_11_41.log |
| 6                                              | -5.368544 | 1.338829  | -0.616734 |                 |
| 12                                             | 2.009471  | 0.079337  | 0.527185  |                 |
| 6                                              | -4.387705 | 0.492847  | -0.723265 |                 |
| 6                                              | 3.759754  | -1.380939 | 0.684699  |                 |
| 6                                              | -3.238547 | -0.128972 | -0.895451 |                 |
| 12                                             | -1.553032 | 0.633954  | 1.416050  |                 |
| 8                                              | -1.635132 | -2.602027 | 0.475789  |                 |
| 6                                              | -2.185440 | -2.668499 | 1.461493  |                 |
| 6                                              | -2.073270 | -0.648748 | -1.174740 |                 |
| 8                                              | 2.926401  | 2.429440  | 0.419914  |                 |
| 6                                              | -0.872679 | -0.201204 | -1.032100 |                 |
| 6                                              | 2.964023  | 3.451421  | -0.167101 |                 |
| 6                                              | 4.111575  | -1.804229 | -0.470743 |                 |
| 6                                              | 4.734135  | -1.951689 | -1.669337 |                 |
| 6                                              | -0.213819 | 1.760425  | 0.068323  |                 |
| 6                                              | 0.135947  | 0.544293  | -0.545784 |                 |
| 16                                             |           |           |           |                 |
| 328.464215 Kcal/mol 14.243574 eV -100.860239 H |           |           |           | MutD_15_50.log  |
| 6                                              | 4.907933  | -2.577849 | -0.402229 |                 |
| 6                                              | 0.988753  | 4.094140  | 0.036186  |                 |
| 6                                              | 3.124060  | -0.806285 | 0.031269  |                 |
| 6                                              | -0.795281 | 0.126386  | 2.338391  |                 |
| 8                                              | -2.841010 | 0.825615  | -1.142154 |                 |
| 6                                              | -1.749762 | -2.878157 | -0.466192 |                 |
| 6                                              | -0.172899 | 3.387631  | -0.038712 |                 |
| 12                                             | 1.724618  | 0.783949  | 0.264896  |                 |
| 6                                              | -0.261092 | -0.725138 | -0.001667 |                 |
| 6                                              | 1.494908  | 2.893463  | -0.184108 |                 |
| 8                                              | 0.569137  | -0.394097 | -0.934355 |                 |
| 6                                              | -1.216031 | -1.751156 | -0.210837 |                 |
| 6                                              | -0.153527 | -0.036662 | 1.220304  |                 |
| 12                                             | -3.457417 | -1.865548 | 0.411946  |                 |
| 6                                              | 3.999173  | -1.637819 | -0.251672 |                 |
| 6                                              | -3.671473 | 1.499289  | -0.655739 |                 |
| 16                                             |           |           |           |                 |
| 328.624179 Kcal/mol 14.250511 eV -100.859984 H |           |           |           |                 |
| Original3D_2_6.log                             |           |           |           |                 |
| 6                                              | 0.564541  | 1.555743  | -1.664446 |                 |
| 6                                              | -0.706436 | 1.258605  | 0.590029  |                 |
| 12                                             | 3.247679  | -1.206909 | 0.296328  |                 |
| 6                                              | 1.577956  | 1.805579  | -0.627438 |                 |
| 12                                             | -0.489679 | -2.008420 | -0.142662 |                 |
| 6                                              | 1.620620  | -2.231574 | -0.624993 |                 |

|            |                     |           |           |                             |
|------------|---------------------|-----------|-----------|-----------------------------|
| 6          | 0.264967            | 1.874259  | -0.264448 |                             |
| 6          | -3.014650           | -0.800005 | -0.813300 |                             |
| 6          | -2.071476           | 1.275765  | 0.358816  |                             |
| 6          | 3.806976            | 0.804712  | 0.136917  |                             |
| 8          | -1.001086           | -0.912328 | 1.486990  |                             |
| 6          | -2.470347           | -1.903847 | -1.061706 |                             |
| 6          | -3.044879           | 0.456495  | -0.246170 |                             |
| 8          | -0.093672           | 0.258029  | 1.231815  |                             |
| 6          | 2.864872            | 1.565425  | -0.177077 |                             |
| 6          | -3.448465           | 1.641899  | 0.461410  |                             |
| 16         |                     |           |           |                             |
| 328.961658 | Kcal/mol            | 14.265146 | eV        | -100.859446 H MutD_9_74.log |
| 6          | -3.812584           | -1.399651 | -0.342729 |                             |
| 6          | -2.452723           | -1.479351 | -0.273820 |                             |
| 6          | -1.061616           | 2.104915  | -0.109247 |                             |
| 6          | 2.642432            | 2.238971  | 0.254706  |                             |
| 12         | -3.058993           | 0.608561  | -0.116644 |                             |
| 6          | 1.572172            | -0.067170 | 0.029746  |                             |
| 6          | 0.946754            | -1.212160 | -0.125696 |                             |
| 8          | 1.004785            | -2.171531 | 1.061993  |                             |
| 6          | 2.080069            | 0.989838  | 0.432452  |                             |
| 6          | -1.277975           | -1.908121 | -0.090852 |                             |
| 12         | 5.495165            | -1.463195 | -0.522105 |                             |
| 6          | 0.024000            | -2.260107 | -0.085521 |                             |
| 6          | -2.291775           | 2.608335  | -0.267969 |                             |
| 8          | 2.441688            | 3.375985  | -0.159126 |                             |
| 6          | -1.018363           | 1.109107  | 0.774084  |                             |
| 6          | -4.818032           | -0.621277 | -0.121477 |                             |
| 16         |                     |           |           |                             |
| 329.363377 | Kcal/mol            | 14.282566 | eV        | -100.858806 H               |
|            | Original2D_13_2.log |           |           |                             |
| 6          | 1.865751            | 1.480191  | 0.000000  |                             |
| 6          | 3.272171            | 1.547095  | 0.000000  |                             |
| 12         | 0.000000            | 0.618672  | 0.000000  |                             |
| 6          | 0.418254            | -1.694765 | -0.000000 |                             |
| 8          | -1.767791           | -2.630555 | -0.000000 |                             |
| 6          | -2.084028           | 0.946928  | -0.000000 |                             |
| 6          | -3.310165           | 3.237588  | -0.000000 |                             |
| 6          | 2.758760            | -0.989041 | 0.000000  |                             |
| 12         | -2.667840           | -0.962837 | -0.000000 |                             |
| 6          | 1.863316            | -2.081282 | 0.000000  |                             |
| 6          | 2.257787            | -3.372499 | 0.000000  |                             |
| 8          | -0.319286           | -2.791947 | -0.000000 |                             |
| 6          | 3.292601            | 0.114894  | 0.000000  |                             |
| 6          | -2.695324           | 2.071887  | -0.000000 |                             |
| 6          | -3.932718           | 4.357332  | -0.000000 |                             |
| 6          | 4.412044            | 2.300008  | 0.000000  |                             |
| 16         |                     |           |           |                             |
| 332.742348 | Kcal/mol            | 14.429092 | eV        | -100.853422 H MutI_2_77.log |
| 8          | -2.150883           | -1.922375 | -0.009389 |                             |
| 6          | 1.753222            | 2.105744  | -2.259122 |                             |
| 6          | 3.487951            | -0.207095 | 0.726661  |                             |
| 8          | -0.837713           | 1.741635  | -1.066807 |                             |
| 6          | -2.714933           | 3.661179  | 1.128257  |                             |
| 6          | 0.364095            | -2.260790 | -0.201985 |                             |



|                                                |           |           |            |                |
|------------------------------------------------|-----------|-----------|------------|----------------|
| 6                                              | 0.273788  | 1.401268  | -1.225191  |                |
| 6                                              | -0.182963 | -3.624666 | -0.127138  |                |
| 6                                              | 4.524445  | 0.234234  | 1.335434   |                |
| 6                                              | 5.535338  | 0.843007  | 1.934511   |                |
| 6                                              | -3.220152 | 1.074131  | 0.881723   |                |
| 6                                              | -0.980098 | -2.483641 | -0.095942  |                |
| 6                                              | -2.910198 | 2.341098  | 1.006211   |                |
| 6                                              | 1.531126  | 0.928453  | -1.565767  |                |
| 12                                             | -3.639871 | -0.996252 | 0.435589   |                |
| 12                                             | 1.901458  | -0.889715 | -0.486951  |                |
| 16                                             |           |           |            |                |
| 333.863046 Kcal/mol 14.477690 eV -100.851636 H |           |           |            | Child_7_19.log |
| 12                                             | -2.201377 | 2.269937  | -0.096888  |                |
| 6                                              | -0.499892 | -2.324781 | 0.118790   |                |
| 12                                             | 1.761224  | 1.966357  | -0.144208  |                |
| 6                                              | 0.836128  | -1.641527 | -0.005394  |                |
| 6                                              | -0.246608 | 1.645834  | -0.504728  |                |
| 6                                              | -1.766538 | -2.221463 | 0.103798   |                |
| 6                                              | 3.816070  | 0.333038  | -0.124082  |                |
| 6                                              | 2.165226  | -1.622804 | 0.183168   |                |
| 6                                              | -0.961419 | 0.311333  | -0.192852  |                |
| 8                                              | -4.124935 | -1.556282 | 0.014031   |                |
| 6                                              | 3.219018  | -0.858736 | 0.083717   |                |
| 6                                              | -2.915870 | -1.255654 | 0.038775   |                |
| 6                                              | -2.336904 | 0.113572  | 0.001117   |                |
| 6                                              | -0.174767 | -0.813345 | -0.316295  |                |
| 6                                              | 5.287218  | -1.310809 | -0.000518  |                |
| 8                                              | -0.031082 | 2.435847  | 0.808492   |                |
| 16                                             |           |           |            |                |
| 335.054007 Kcal/mol 14.529335 eV -100.849738 H |           |           |            |                |
| OriginalD_13_0.log                             |           |           |            |                |
| 12                                             | 0.000000  | 0.000000  | -0.183995  |                |
| 6                                              | 0.000000  | 0.000000  | 1.853997   |                |
| 6                                              | 0.000000  | 0.000000  | -2.246806  |                |
| 6                                              | 0.000000  | 0.000000  | -3.525505  |                |
| 12                                             | 0.000000  | 0.000000  | 3.927827   |                |
| 6                                              | 0.000000  | 0.000000  | -4.806207  |                |
| 6                                              | 0.000000  | 0.000000  | 5.936890   |                |
| 8                                              | 0.000000  | 0.000000  | -6.028402  |                |
| 6                                              | 0.000000  | 0.000000  | 7.200414   |                |
| 6                                              | 0.000000  | 0.000000  | 8.517037   |                |
| 6                                              | 0.000000  | 0.000000  | -7.293251  |                |
| 6                                              | 0.000000  | 0.000000  | 9.784278   |                |
| 6                                              | 0.000000  | 0.000000  | -8.535524  |                |
| 8                                              | 0.000000  | 0.000000  | 10.989719  |                |
| 6                                              | 0.000000  | 0.000000  | -9.849924  |                |
| 6                                              | 0.000000  | 0.000000  | -11.138152 |                |
| 16                                             |           |           |            |                |
| 335.246353 Kcal/mol 14.537676 eV -100.849431 H |           |           |            | Child_9_19.log |
| 6                                              | 2.792912  | 3.570147  | 0.052251   |                |
| 6                                              | -4.687751 | -1.261793 | 0.227651   |                |
| 8                                              | 1.638293  | 3.642399  | 0.029617   |                |
| 6                                              | -3.406623 | -1.609396 | -0.049652  |                |
| 8                                              | 2.354330  | 1.264034  | -0.164596  |                |
| 6                                              | 4.023545  | -2.103206 | -0.017177  |                |

|                                                |           |           |           |                 |
|------------------------------------------------|-----------|-----------|-----------|-----------------|
| 12                                             | -1.311837 | -2.045024 | -0.046455 |                 |
| 6                                              | 1.932099  | 0.154779  | -0.079630 |                 |
| 6                                              | -3.089593 | -0.208019 | -0.404258 |                 |
| 6                                              | -1.592701 | 3.040452  | 0.102376  |                 |
| 6                                              | -3.135340 | 1.016586  | -0.031112 |                 |
| 6                                              | 2.746948  | -1.780007 | 0.053779  |                 |
| 6                                              | -2.581456 | 2.154093  | 0.127879  |                 |
| 6                                              | -0.222972 | 2.569779  | 0.078919  |                 |
| 6                                              | 1.491707  | -1.117092 | -0.033214 |                 |
| 12                                             | 1.514701  | -3.439091 | 0.122535  |                 |
| 16                                             |           |           |           |                 |
| 336.976069 Kcal/mol 14.612684 eV -100.846675 H |           |           |           | Child_12_54.log |
| 6                                              | -1.591812 | 2.735483  | 0.446393  |                 |
| 12                                             | 3.685683  | -2.298474 | 2.366021  |                 |
| 6                                              | -0.270723 | 2.804024  | 0.339072  |                 |
| 6                                              | -4.658183 | -2.595485 | -0.447270 |                 |
| 6                                              | -2.738038 | 2.259890  | 0.480189  |                 |
| 6                                              | -3.436505 | -2.217256 | -0.610353 |                 |
| 6                                              | 0.934926  | 2.489578  | 0.176494  |                 |
| 6                                              | -2.087785 | -1.905025 | -0.755121 |                 |
| 8                                              | -3.811354 | 1.567234  | 0.431212  |                 |
| 6                                              | -0.889960 | -1.563649 | -0.854114 |                 |
| 6                                              | 2.008207  | 1.754433  | -0.048333 |                 |
| 6                                              | 0.424185  | -1.190502 | -0.875013 |                 |
| 6                                              | 2.933005  | 0.833678  | -0.265483 |                 |
| 6                                              | 1.636850  | -0.817348 | -0.921893 |                 |
| 12                                             | -3.302830 | -0.218946 | -0.030861 |                 |
| 8                                              | 9.038948  | 0.268030  | -1.432377 |                 |
| 16                                             |           |           |           |                 |
| 338.386720 Kcal/mol 14.673856 eV -100.844427 H |           |           |           | MutD_14_36.log  |
| 6                                              | -0.460220 | -0.054335 | -0.875836 |                 |
| 6                                              | -0.881499 | -1.373264 | -1.799619 |                 |
| 6                                              | -2.188684 | -0.628373 | 0.406861  |                 |
| 12                                             | -0.447761 | -2.162114 | 0.106841  |                 |
| 6                                              | -1.243337 | 0.257852  | 0.189685  |                 |
| 6                                              | 0.805675  | 0.511258  | -0.509352 |                 |
| 8                                              | 1.548920  | -1.694900 | -0.302640 |                 |
| 6                                              | -0.304046 | 2.810360  | -0.761574 |                 |
| 8                                              | -0.224194 | 0.712712  | 3.054111  |                 |
| 6                                              | 3.202905  | 0.048755  | -0.166654 |                 |
| 6                                              | 0.550271  | 1.882357  | -0.692514 |                 |
| 12                                             | -2.083199 | 1.738000  | -0.679953 |                 |
| 6                                              | 4.335352  | 0.635775  | 0.005278  |                 |
| 6                                              | -0.173596 | 0.268391  | 1.984879  |                 |
| 6                                              | -2.266410 | -1.790209 | 0.015402  |                 |
| 6                                              | 1.919208  | -0.410756 | -0.318963 |                 |
| 16                                             |           |           |           |                 |
| 340.845773 Kcal/mol 14.780490 eV -100.840508 H |           |           |           |                 |
| Original3D_12_5.log                            |           |           |           |                 |
| 6                                              | 3.279096  | -0.428251 | 0.360420  |                 |
| 6                                              | 2.733001  | 0.939403  | 0.827677  |                 |
| 6                                              | 1.921679  | -0.399484 | -0.154964 |                 |
| 6                                              | 4.329126  | -0.188810 | -1.277150 |                 |
| 12                                             | 0.632285  | 0.877558  | 0.921716  |                 |
| 6                                              | -4.068354 | -1.335395 | 0.705124  |                 |

|                                                |            |           |           |                 |
|------------------------------------------------|------------|-----------|-----------|-----------------|
| 6                                              | 3.003045   | 0.316989  | -1.073016 |                 |
| 8                                              | -1.249778  | 0.961861  | 0.850938  |                 |
| 6                                              | -2.378802  | 0.440110  | 0.578386  |                 |
| 6                                              | 4.380783   | -1.261368 | -0.213048 |                 |
| 8                                              | 2.925565   | 1.698549  | -0.536446 |                 |
| 6                                              | -5.718194  | -0.661515 | -1.146000 |                 |
| 6                                              | -3.023242  | -0.701524 | 1.035985  |                 |
| 6                                              | 5.078614   | -2.296038 | 0.211416  |                 |
| 6                                              | -5.074089  | -1.210534 | -0.186195 |                 |
| 12                                             | -3.980808  | 0.742044  | -0.965695 |                 |
| 16                                             |            |           |           |                 |
| 341.817091 Kcal/mol 14.822611 eV -100.838960 H |            |           |           | MutD_16_54.log  |
| 6                                              | 4.737452   | -0.356963 | -0.431092 |                 |
| 8                                              | -3.861477  | 2.011507  | 0.241299  |                 |
| 6                                              | -6.674120  | -0.946279 | 0.341467  |                 |
| 6                                              | 10.550514  | 0.023489  | 0.236596  |                 |
| 12                                             | 1.572516   | -0.067769 | -0.527930 |                 |
| 8                                              | -10.599405 | -0.845130 | -0.210706 |                 |
| 6                                              | -8.135989  | -0.562301 | 0.149181  |                 |
| 6                                              | -9.398486  | -0.747847 | -0.127401 |                 |
| 6                                              | -1.632683  | 0.990303  | -0.063488 |                 |
| 6                                              | 9.779345   | -0.550638 | 1.088823  |                 |
| 6                                              | -0.421004  | 0.647842  | -0.194886 |                 |
| 6                                              | -2.873700  | 1.430027  | 0.134342  |                 |
| 6                                              | 6.068245   | -0.266800 | -0.607876 |                 |
| 6                                              | -5.542971  | -0.345890 | 0.777804  |                 |
| 6                                              | 3.530065   | 0.183246  | -0.362524 |                 |
| 12                                             | 8.074738   | -0.458910 | 0.037062  |                 |
| 16                                             |            |           |           |                 |
| 343.107093 Kcal/mol 14.878550 eV -100.836904 H |            |           |           | Child_3_61.log  |
| 6                                              | -2.120725  | 1.334271  | -1.319702 |                 |
| 6                                              | 5.158771   | -3.232590 | -0.601947 |                 |
| 6                                              | -1.451605  | 2.376495  | 0.942900  |                 |
| 6                                              | 4.589677   | -3.344808 | 0.522672  |                 |
| 6                                              | -2.859089  | 0.865184  | -0.188388 |                 |
| 12                                             | 4.456288   | -1.226034 | 0.022601  |                 |
| 6                                              | -1.156646  | 2.167579  | -1.136131 |                 |
| 6                                              | 3.795189   | 0.708267  | 0.057990  |                 |
| 6                                              | -2.492060  | 1.629334  | 0.980415  |                 |
| 6                                              | 3.272157   | 1.840435  | 0.154303  |                 |
| 6                                              | -0.518551  | 2.729794  | -0.036751 |                 |
| 12                                             | 1.583269   | 2.895740  | 0.118362  |                 |
| 6                                              | -3.565228  | -0.326866 | -0.100063 |                 |
| 8                                              | -4.078117  | -2.686466 | 0.577171  |                 |
| 6                                              | -3.926111  | -1.469443 | 0.128521  |                 |
| 8                                              | -4.025552  | -3.776332 | -0.341481 |                 |
| 16                                             |            |           |           |                 |
| 343.551130 Kcal/mol 14.897806 eV -100.836197 H |            |           |           | Child_16_20.log |
| 12                                             | -0.486142  | 3.045646  | -0.073961 |                 |
| 6                                              | -1.113709  | -2.330833 | 0.348859  |                 |
| 6                                              | -2.390629  | 1.833360  | -0.456785 |                 |
| 6                                              | 0.042336   | -2.406146 | -0.285197 |                 |
| 6                                              | -1.414231  | 0.993244  | -0.255831 |                 |
| 8                                              | 1.021658   | -2.270602 | -1.025211 |                 |
| 6                                              | 0.841737   | 1.445338  | 0.015998  |                 |

|                                                |           |           |           |                 |  |
|------------------------------------------------|-----------|-----------|-----------|-----------------|--|
| 6                                              | -2.270742 | -1.568263 | 0.565410  |                 |  |
| 6                                              | 2.355228  | 1.186656  | 0.101388  |                 |  |
| 6                                              | 4.219269  | -0.524636 | 0.966184  |                 |  |
| 8                                              | -4.804208 | -0.195870 | 0.355996  |                 |  |
| 6                                              | -3.510746 | -0.984096 | 0.480363  |                 |  |
| 6                                              | -0.215262 | 0.459152  | -0.056479 |                 |  |
| 6                                              | 2.813882  | -0.449805 | 1.338359  |                 |  |
| 6                                              | 3.572441  | 0.664447  | 0.035671  |                 |  |
| 12                                             | 1.543054  | -0.560541 | -0.878866 |                 |  |
| 16                                             |           |           |           |                 |  |
| 343.738521 Kcal/mol 14.905932 eV -100.835898 H |           |           |           | Child_12_48.log |  |
| 6                                              | -6.219157 | 1.595735  | -0.058725 |                 |  |
| 6                                              | 2.310991  | -2.577407 | -0.193301 |                 |  |
| 6                                              | -4.789486 | 1.619335  | -0.313964 |                 |  |
| 6                                              | 3.480749  | -2.020976 | -0.246333 |                 |  |
| 6                                              | 1.628184  | 4.542812  | 0.131936  |                 |  |
| 6                                              | 4.636638  | -1.463426 | -0.318134 |                 |  |
| 6                                              | -5.507616 | 0.277490  | 0.063690  |                 |  |
| 6                                              | 1.067453  | -2.835908 | 0.062045  |                 |  |
| 8                                              | 1.662480  | 3.416285  | 0.522264  |                 |  |
| 6                                              | -0.181355 | -2.903333 | 0.268463  |                 |  |
| 6                                              | -4.103902 | 0.359801  | -0.200876 |                 |  |
| 12                                             | -2.094774 | -2.382933 | 0.506055  |                 |  |
| 6                                              | -2.893548 | -0.248174 | -0.279217 |                 |  |
| 12                                             | 4.477873  | 0.598329  | 0.098262  |                 |  |
| 6                                              | -1.605273 | -0.279893 | -0.486340 |                 |  |
| 8                                              | 3.895114  | 2.211079  | -0.250673 |                 |  |
| 16                                             |           |           |           |                 |  |
| 347.090156 Kcal/mol 15.051273 eV -100.830557 H |           |           |           | Child_7_31.log  |  |
| 8                                              | 6.524925  | -0.942160 | 0.831119  |                 |  |
| 6                                              | -5.326620 | -1.625709 | 0.986813  |                 |  |
| 6                                              | 5.534782  | -0.419736 | 0.411731  |                 |  |
| 6                                              | -2.994597 | 1.946265  | 0.849559  |                 |  |
| 6                                              | 4.466137  | 0.118442  | -0.014603 |                 |  |
| 6                                              | -0.763380 | -1.176969 | 0.001522  |                 |  |
| 6                                              | 3.340079  | 0.559334  | -0.489955 |                 |  |
| 6                                              | -4.677145 | -1.621738 | -0.211445 |                 |  |
| 6                                              | 2.193768  | 0.946015  | -0.894126 |                 |  |
| 6                                              | -1.814993 | 1.786827  | 1.451011  |                 |  |
| 6                                              | 0.894995  | 1.065261  | -1.223437 |                 |  |
| 6                                              | -4.269059 | 1.902616  | 0.499463  |                 |  |
| 6                                              | -0.324749 | 0.833772  | -1.382959 |                 |  |
| 12                                             | -2.813282 | -1.078678 | -0.562385 |                 |  |
| 12                                             | 1.141624  | -0.370857 | 0.691274  |                 |  |
| 8                                              | -1.211851 | -0.119322 | -1.012132 |                 |  |
| 16                                             |           |           |           |                 |  |
| 350.846511 Kcal/mol 15.214164 eV -100.824571 H |           |           |           | Child_7_42.log  |  |
| 6                                              | -2.913004 | -2.373071 | 1.647459  |                 |  |
| 12                                             | 3.982516  | 1.775575  | 0.121712  |                 |  |
| 6                                              | -3.250007 | -1.680737 | 0.634794  |                 |  |
| 6                                              | 2.402723  | 3.034719  | 0.119385  |                 |  |
| 6                                              | -3.920140 | -0.801380 | -0.095188 |                 |  |
| 6                                              | 4.173051  | -0.243654 | 0.214623  |                 |  |
| 12                                             | -5.529576 | 1.769683  | -0.147983 |                 |  |
| 6                                              | 1.116268  | 2.883086  | 0.205561  |                 |  |

|            |                    |           |           |                              |
|------------|--------------------|-----------|-----------|------------------------------|
| 6          | -0.380809          | -1.539044 | -0.548636 |                              |
| 6          | 3.440438           | -1.343957 | 0.029941  |                              |
| 6          | -4.550584          | 0.110080  | -0.749528 |                              |
| 6          | -0.227792          | 2.733128  | 0.259657  |                              |
| 6          | 0.892905           | -1.769040 | -0.280706 |                              |
| 6          | 2.127093           | -1.735284 | -0.084878 |                              |
| 8          | -1.539206          | -1.359521 | -0.641696 |                              |
| 8          | 4.677187           | -1.914501 | -0.333260 |                              |
| 16         |                    |           |           |                              |
| 351.089316 | Kcal/mol           | 15.224693 | eV        | -100.824184 H MutD_1_68.log  |
| 6          | 4.112388           | -1.620813 | 0.582296  |                              |
| 12         | 0.267242           | 1.703831  | 0.647856  |                              |
| 12         | 5.094882           | -1.000676 | -1.482026 |                              |
| 8          | -1.395604          | 3.525703  | -1.751427 |                              |
| 6          | -1.411791          | -0.889434 | -1.076781 |                              |
| 6          | -1.333364          | 3.233234  | -0.597327 |                              |
| 6          | 2.590725           | 0.214994  | 1.490283  |                              |
| 6          | 1.829875           | 1.144644  | 1.790653  |                              |
| 6          | -1.168480          | 0.406839  | -0.239665 |                              |
| 6          | -2.036454          | -0.127768 | 0.781236  |                              |
| 6          | -3.460768          | -2.192666 | 0.025491  |                              |
| 6          | -4.391137          | -3.087388 | 0.142591  |                              |
| 6          | 3.373488           | -0.795689 | 1.046460  |                              |
| 6          | -2.476801          | -1.305568 | -0.060868 |                              |
| 8          | -2.227184          | 0.232405  | 1.941890  |                              |
| 6          | -1.521546          | -1.397508 | -2.469980 |                              |
| 16         |                    |           |           |                              |
| 351.230608 | Kcal/mol           | 15.230820 | eV        | -100.823959 H MutD_16_78.log |
| 6          | 0.431523           | -2.032273 | 0.465757  |                              |
| 6          | -3.427196          | -1.379513 | -0.580491 |                              |
| 6          | 3.645939           | 3.699004  | -0.123742 |                              |
| 6          | 2.370574           | 1.416309  | 0.395968  |                              |
| 6          | 2.737370           | 2.772448  | -0.048879 |                              |
| 6          | 4.256197           | -2.084478 | 0.064515  |                              |
| 8          | -1.752889          | 2.085438  | 0.068443  |                              |
| 8          | 3.547292           | 0.731373  | -0.145406 |                              |
| 12         | -3.178619          | 0.608821  | 0.062991  |                              |
| 6          | -2.140909          | -1.731184 | -0.068147 |                              |
| 6          | -4.666105          | -0.907435 | 0.053323  |                              |
| 6          | -1.970597          | 3.224195  | -0.146436 |                              |
| 12         | 2.384368           | -2.695256 | -0.111245 |                              |
| 6          | -0.761926          | -1.928610 | 0.041391  |                              |
| 6          | -5.375072          | 0.184137  | 0.189174  |                              |
| 6          | 4.096166           | -0.815477 | -0.043307 |                              |
| 16         |                    |           |           |                              |
| 354.267583 | Kcal/mol           | 15.362516 | eV        | -100.819119 H                |
|            | Original2D_7_1.log |           |           |                              |
| 8          | 1.788692           | 2.904683  | 0.000000  |                              |
| 6          | 1.207345           | -1.712951 | -0.000000 |                              |
| 6          | 2.476848           | -2.279106 | -0.000000 |                              |
| 6          | 0.000000           | -1.414835 | -0.000000 |                              |
| 6          | 3.051862           | -3.484262 | -0.000000 |                              |
| 6          | 5.110858           | -2.310877 | -0.000000 |                              |
| 6          | 1.041746           | 3.801582  | 0.000000  |                              |
| 12         | -1.994107          | -1.277553 | -0.000000 |                              |

|            |           |           |           |                               |
|------------|-----------|-----------|-----------|-------------------------------|
| 6          | 3.898664  | -1.905432 | -0.000000 |                               |
| 12         | 5.039554  | -4.532547 | -0.000000 |                               |
| 6          | -4.944381 | 0.063710  | 0.000000  |                               |
| 8          | -2.891942 | 3.939002  | 0.000000  |                               |
| 6          | -3.065205 | 5.132373  | 0.000000  |                               |
| 6          | -3.495960 | 6.420798  | 0.000000  |                               |
| 6          | -5.852922 | 1.030057  | 0.000000  |                               |
| 6          | -4.048750 | -0.845772 | 0.000000  |                               |
| 16         |           |           |           |                               |
| 354.535254 | Kcal/mol  | 15.374123 | eV        | -100.818692 H Child_9_51.log  |
| 6          | -1.122681 | 3.285291  | 0.080663  |                               |
| 6          | -3.149103 | -3.365394 | -0.049074 |                               |
| 6          | -2.099472 | 2.484784  | 0.017397  |                               |
| 12         | 1.705853  | -2.113212 | -0.376044 |                               |
| 12         | 0.587344  | 2.103920  | 0.019551  |                               |
| 6          | -3.675123 | -2.216673 | 0.168850  |                               |
| 6          | -3.020226 | 1.505679  | 0.031522  |                               |
| 6          | 3.639476  | -1.072078 | -0.088333 |                               |
| 6          | -3.618998 | 0.387753  | 0.081899  |                               |
| 6          | 1.597688  | 0.249817  | 0.029958  |                               |
| 6          | -0.198768 | -1.012450 | -0.210419 |                               |
| 8          | -0.462021 | 0.237327  | -0.183544 |                               |
| 6          | -3.831656 | -0.903316 | 0.126219  |                               |
| 6          | 3.449393  | -1.832858 | 0.930687  |                               |
| 6          | 4.035867  | 0.535361  | 0.122255  |                               |
| 8          | 3.017427  | 1.242174  | -0.212933 |                               |
| 16         |           |           |           |                               |
| 354.843171 | Kcal/mol  | 15.387476 | eV        | -100.818202 H MutI_10_73.log  |
| 12         | 1.490999  | 2.157365  | 0.065816  |                               |
| 6          | 1.294047  | -1.902974 | 1.287799  |                               |
| 6          | -0.359722 | 3.209496  | -0.042427 |                               |
| 6          | 2.514814  | 1.075539  | -1.498374 |                               |
| 6          | -1.579559 | 2.860597  | 0.213876  |                               |
| 6          | -1.169281 | -1.202241 | 0.691003  |                               |
| 8          | 2.716074  | -0.106628 | -1.368688 |                               |
| 12         | -5.316703 | -1.091770 | -0.945645 |                               |
| 6          | -2.142498 | 1.638601  | 0.382247  |                               |
| 6          | -3.585105 | -0.763587 | -0.178851 |                               |
| 6          | 3.746754  | -1.383007 | -1.251204 |                               |
| 6          | 1.697462  | 0.587525  | 1.566784  |                               |
| 8          | 3.261725  | -2.213053 | -0.529898 |                               |
| 6          | 1.690356  | -0.678730 | 1.853463  |                               |
| 6          | -0.026355 | -1.623083 | 0.992167  |                               |
| 6          | -2.399903 | -0.856416 | 0.274622  |                               |
| 16         |           |           |           |                               |
| 355.506279 | Kcal/mol  | 15.416231 | eV        | -100.817145 H Child_10_32.log |
| 6          | -0.179472 | -0.965434 | 2.552064  |                               |
| 12         | 1.598016  | -2.650160 | -0.997795 |                               |
| 6          | -6.002877 | 2.565597  | -0.622819 |                               |
| 6          | 3.050304  | -1.552499 | -2.192062 |                               |
| 8          | -6.994253 | 2.510762  | -1.020988 |                               |
| 6          | 2.701748  | -0.598086 | -1.455134 |                               |
| 6          | 0.671410  | -0.884888 | 1.663252  |                               |
| 12         | -1.671193 | -1.938488 | 1.455153  |                               |
| 6          | 2.050044  | -0.021594 | -0.280454 |                               |

|            |           |           |           |                              |
|------------|-----------|-----------|-----------|------------------------------|
| 6          | -2.721259 | -3.011650 | -0.092688 |                              |
| 6          | 2.978115  | 3.850165  | 0.330182  |                              |
| 6          | 1.898771  | 1.294375  | 0.042025  |                              |
| 6          | 1.426880  | -1.018213 | 0.533941  |                              |
| 6          | -2.096098 | -2.067204 | -0.757181 |                              |
| 6          | 3.416947  | 5.003420  | 0.247613  |                              |
| 8          | 1.708131  | 2.426717  | 0.358396  |                              |
| 16         |           |           |           |                              |
| 359.185933 | Kcal/mol  | 15.575796 | eV        | -100.811281 H MutD_14_42.log |
| 12         | -3.483662 | -1.926796 | 0.142400  |                              |
| 8          | 0.682448  | -0.478723 | -0.766216 |                              |
| 6          | -1.291374 | -0.285874 | 2.103487  |                              |
| 6          | 0.752413  | 3.977529  | -0.506233 |                              |
| 6          | -0.265303 | 0.093096  | 1.315897  |                              |
| 6          | -0.294673 | -0.686789 | 0.049833  |                              |
| 6          | -1.515664 | -2.933928 | -0.515672 |                              |
| 6          | 4.573859  | -2.698267 | -0.644996 |                              |
| 6          | -1.249463 | -1.712871 | -0.232246 |                              |
| 6          | -3.395891 | 1.187788  | -1.042969 |                              |
| 6          | 1.362271  | 2.865144  | -0.235719 |                              |
| 12         | 1.655467  | 0.800856  | 0.418938  |                              |
| 8          | -2.317533 | 1.372149  | -0.693246 |                              |
| 6          | 4.006253  | -1.600703 | -0.161566 |                              |
| 6          | -0.161629 | 3.482682  | 0.394893  |                              |
| 6          | 3.315705  | -0.627162 | 0.298565  |                              |
| 16         |           |           |           |                              |
| 359.417805 | Kcal/mol  | 15.585851 | eV        | -100.810911 H Child_8_57.log |
| 6          | -2.361834 | 4.195924  | -0.120586 |                              |
| 6          | 6.323290  | 1.195655  | -1.211888 |                              |
| 6          | -2.305220 | 2.884871  | 0.088584  |                              |
| 6          | 5.369036  | 0.661068  | -0.516951 |                              |
| 6          | -2.845729 | 1.387071  | 0.038024  |                              |
| 6          | 4.434749  | 0.023088  | 0.130438  |                              |
| 6          | -1.560554 | 1.638563  | 0.358966  |                              |
| 12         | 2.555311  | -1.295995 | 0.224293  |                              |
| 8          | -5.709210 | -1.440323 | -0.101689 |                              |
| 6          | 0.640212  | -1.988884 | -0.075720 |                              |
| 6          | -4.700501 | -0.800857 | 0.002898  |                              |
| 6          | -0.634667 | -2.214143 | -0.313321 |                              |
| 6          | -3.428385 | -0.287703 | -0.127588 |                              |
| 6          | -1.922578 | -2.494063 | -0.585662 |                              |
| 8          | 4.027853  | -0.413242 | 1.267509  |                              |
| 12         | 0.061684  | 0.431410  | 0.164896  |                              |
| 16         |           |           |           |                              |
| 360.465848 | Kcal/mol  | 15.631298 | eV        | -100.809241 H Child_12_8.log |
| 6          | 0.461967  | -1.187428 | -1.068719 |                              |
| 6          | -0.219646 | 4.331883  | 2.245953  |                              |
| 8          | -3.260053 | -1.311838 | -0.223591 |                              |
| 6          | -0.114328 | 3.538053  | 1.226725  |                              |
| 12         | -1.451921 | -1.309415 | -0.230540 |                              |
| 6          | 0.064713  | 2.770695  | 0.201261  |                              |
| 6          | 1.701791  | -1.067376 | -0.878585 |                              |
| 8          | 0.954679  | 1.731090  | -1.735748 |                              |
| 6          | -4.495935 | -0.970645 | -0.059679 |                              |
| 6          | 1.604338  | 1.272508  | -2.610161 |                              |

|                                                |           |           |           |                |
|------------------------------------------------|-----------|-----------|-----------|----------------|
| 6                                              | 2.912237  | -1.116336 | -0.216764 |                |
| 6                                              | -0.003182 | 1.873684  | -0.738045 |                |
| 6                                              | -5.744422 | -0.518278 | 0.188336  |                |
| 6                                              | 4.253498  | -0.959174 | 0.333649  |                |
| 6                                              | 3.173149  | -1.600721 | 1.052616  |                |
| 12                                             | 1.191748  | -2.153519 | 1.698473  |                |
| 16                                             |           |           |           |                |
| 361.284190 Kcal/mol 15.666785 eV -100.807937 H |           |           |           | MutD_4_64.log  |
| 6                                              | -2.483204 | 4.261848  | 0.545029  |                |
| 6                                              | -3.483471 | 3.821160  | 0.054355  |                |
| 8                                              | 0.586221  | -0.442891 | 1.256197  |                |
| 6                                              | -2.792475 | -3.500481 | -1.112714 |                |
| 6                                              | 7.020560  | 0.147250  | -0.785485 |                |
| 8                                              | -2.922538 | -4.243864 | -0.382860 |                |
| 6                                              | -3.405859 | -0.151777 | -1.401989 |                |
| 6                                              | 5.688007  | 0.089553  | -0.368774 |                |
| 12                                             | -0.907926 | -0.488292 | 1.611920  |                |
| 6                                              | 8.258814  | 0.528855  | -1.000100 |                |
| 6                                              | 3.101012  | -0.043175 | 0.468948  |                |
| 12                                             | -3.662110 | 1.933894  | -1.212427 |                |
| 6                                              | 1.893819  | -0.181812 | 0.822844  |                |
| 6                                              | 4.455346  | 0.067253  | 0.047350  |                |
| 6                                              | -3.155819 | -0.572888 | -0.196540 |                |
| 6                                              | -2.841569 | -1.107982 | 0.963641  |                |
| 16                                             |           |           |           |                |
| 361.739202 Kcal/mol 15.686516 eV -100.807212 H |           |           |           | MutD_18_60.log |
| 8                                              | 3.489132  | 0.313960  | -0.163964 |                |
| 8                                              | -1.920885 | 2.690804  | -0.023101 |                |
| 6                                              | 4.395496  | -0.189937 | -0.929120 |                |
| 6                                              | 2.577385  | 0.890464  | 0.505335  |                |
| 6                                              | -3.383415 | -0.334809 | -0.546428 |                |
| 6                                              | -1.356652 | -1.988532 | 0.467217  |                |
| 12                                             | 0.503688  | 0.854006  | 0.738554  |                |
| 6                                              | -2.664153 | -2.531421 | -0.039431 |                |
| 6                                              | -3.840016 | 1.151627  | -0.827222 |                |
| 6                                              | -3.558134 | -1.669163 | -0.500547 |                |
| 6                                              | -2.586766 | 1.462671  | -0.300015 |                |
| 6                                              | -1.622313 | -3.356825 | 0.497719  |                |
| 6                                              | -0.697805 | 2.781403  | 0.410456  |                |
| 12                                             | 6.387010  | -0.711985 | -0.214815 |                |
| 6                                              | -2.079668 | 0.138539  | -0.015191 |                |
| 6                                              | -1.056352 | -0.644410 | 0.479170  |                |
| 16                                             |           |           |           |                |
| 362.911526 Kcal/mol 15.737353 eV -100.805344 H |           |           |           | Child_9_44.log |
| 8                                              | 4.422815  | 0.579293  | -0.829194 |                |
| 6                                              | -4.583234 | 0.708265  | 0.622392  |                |
| 6                                              | 3.499523  | -0.012514 | -0.443452 |                |
| 6                                              | 2.185426  | 0.537005  | 1.315350  |                |
| 6                                              | -0.900720 | -1.950214 | -0.593812 |                |
| 6                                              | 0.921719  | 0.428038  | 1.563675  |                |
| 6                                              | 0.308145  | -1.779006 | -0.322414 |                |
| 6                                              | -3.129345 | 1.293690  | 0.091963  |                |
| 6                                              | 2.507466  | -0.571306 | 0.240870  |                |
| 6                                              | -2.159182 | 2.021843  | -0.276946 |                |
| 6                                              | 1.697498  | -1.677300 | 0.028500  |                |



|            |           |           |           |                               |
|------------|-----------|-----------|-----------|-------------------------------|
| 6          | -3.632519 | -0.203137 | 0.332806  |                               |
| 6          | 2.647554  | -2.320414 | 0.718677  |                               |
| 12         | -2.997319 | -1.755467 | -0.747026 |                               |
| 12         | -0.486218 | 0.947666  | 0.204679  |                               |
| 8          | 1.280742  | 3.276196  | -0.815492 |                               |
| 16         |           |           |           |                               |
| 363.248091 | Kcal/mol  | 15.751948 | eV        | -100.804807 H Child_16_12.log |
| 6          | 0.386893  | 5.615833  | -1.185584 |                               |
| 6          | -5.611407 | -0.578001 | 2.283449  |                               |
| 6          | 3.944320  | -0.066202 | 0.664129  |                               |
| 12         | -5.237793 | -0.148388 | 0.164967  |                               |
| 6          | 0.653714  | 4.431609  | -0.653459 |                               |
| 8          | -3.713258 | -0.691191 | -0.961475 |                               |
| 8          | 2.804870  | 0.132016  | 0.781676  |                               |
| 6          | -2.611453 | -1.237688 | -0.863747 |                               |
| 12         | 2.199482  | 2.241780  | 1.019922  |                               |
| 6          | -1.458594 | -1.691583 | -0.700860 |                               |
| 6          | 0.791198  | 3.226514  | -0.196132 |                               |
| 6          | 4.829699  | -2.888519 | -0.202538 |                               |
| 6          | 2.201525  | -2.768053 | -0.244805 |                               |
| 6          | -0.272685 | -2.165946 | -0.498173 |                               |
| 6          | 0.941771  | -2.507546 | -0.296154 |                               |
| 6          | 3.492826  | -2.811635 | -0.236172 |                               |
| 16         |           |           |           |                               |
| 363.804655 | Kcal/mol  | 15.776083 | eV        | -100.803921 H Child_15_31.log |
| 12         | 3.352218  | 2.876521  | 0.179732  |                               |
| 6          | -5.008076 | -1.118128 | 1.665848  |                               |
| 8          | 3.789386  | -2.827584 | -0.150968 |                               |
| 6          | -4.703983 | -0.215546 | 0.814028  |                               |
| 6          | 2.622091  | -1.149046 | 1.146327  |                               |
| 6          | -4.019875 | -2.406800 | -0.691309 |                               |
| 6          | 3.002251  | -1.869930 | -0.073367 |                               |
| 8          | -4.439351 | 0.902710  | -0.053053 |                               |
| 6          | 2.088065  | -0.358810 | 1.975046  |                               |
| 6          | -3.277848 | 0.962997  | -0.586341 |                               |
| 6          | 2.229812  | -1.244505 | -1.145680 |                               |
| 6          | -2.080428 | 1.085196  | -0.896420 |                               |
| 12         | 1.188116  | 1.110236  | 0.844018  |                               |
| 6          | -0.842992 | 0.786594  | -1.228088 |                               |
| 6          | 1.379080  | -0.409958 | -1.477416 |                               |
| 6          | 0.397855  | 0.530920  | -1.278101 |                               |
| 16         |           |           |           |                               |
| 363.972708 | Kcal/mol  | 15.783370 | eV        | -100.803653 H Child_11_40.log |
| 8          | 3.415173  | 0.133746  | -0.714312 |                               |
| 6          | -6.331247 | -2.945540 | 0.221878  |                               |
| 8          | 4.137525  | -2.041971 | -0.874359 |                               |
| 12         | 2.511200  | 1.686197  | -0.353921 |                               |
| 12         | -3.282013 | 1.882644  | -0.223331 |                               |
| 6          | 3.375192  | -1.181090 | -0.423599 |                               |
| 6          | -3.552032 | -0.118590 | -0.345007 |                               |
| 6          | 2.309309  | -1.486038 | 0.572929  |                               |
| 6          | -1.703862 | 3.038461  | 0.024020  |                               |
| 6          | 0.580479  | 1.735457  | 0.520778  |                               |
| 6          | -3.287046 | -1.364969 | -0.521031 |                               |
| 6          | 1.296521  | -0.652833 | 1.155458  |                               |

|                                                |           |           |           |                |
|------------------------------------------------|-----------|-----------|-----------|----------------|
| 6                                              | -0.622435 | 2.560996  | 0.217949  |                |
| 6                                              | 0.759418  | 0.528470  | 1.007574  |                |
| 6                                              | -2.964894 | -2.666376 | -0.702500 |                |
| 6                                              | 1.611960  | -2.041332 | 1.544283  |                |
| 16                                             |           |           |           |                |
| 365.090153 Kcal/mol 15.831827 eV -100.801872 H |           |           |           | MutI_15_41.log |
| 6                                              | 5.786524  | 0.149804  | -0.069894 |                |
| 6                                              | -2.322695 | 0.427055  | -0.307381 |                |
| 6                                              | -4.219271 | -1.650382 | 0.071333  |                |
| 12                                             | 1.492953  | -0.574937 | -0.168268 |                |
| 6                                              | -2.635744 | 3.019625  | 0.229529  |                |
| 6                                              | -1.465013 | -0.578830 | -0.186235 |                |
| 6                                              | -4.778747 | -0.529352 | -0.286266 |                |
| 8                                              | -3.155744 | -2.258129 | 0.653981  |                |
| 6                                              | -1.884125 | -1.907990 | 0.588137  |                |
| 6                                              | 8.387681  | 0.294449  | 0.083714  |                |
| 6                                              | 4.493166  | 0.047927  | -0.105092 |                |
| 12                                             | -4.062453 | 1.347683  | -0.795173 |                |
| 6                                              | -2.159058 | 3.045562  | 1.369833  |                |
| 6                                              | 7.079674  | 0.230283  | 0.008134  |                |
| 8                                              | -0.187765 | -0.677190 | -0.140721 |                |
| 6                                              | 3.314619  | -0.179883 | -0.153275 |                |
| 16                                             |           |           |           |                |
| 371.654016 Kcal/mol 16.116464 eV -100.791412 H |           |           |           | Child_9_10.log |
| 12                                             | 6.446533  | -0.038915 | 0.318212  |                |
| 8                                              | -6.287168 | -0.536467 | 0.168425  |                |
| 8                                              | 1.945965  | 2.121204  | -0.218313 |                |
| 6                                              | 1.322964  | -2.540666 | -0.170476 |                |
| 6                                              | 0.651715  | 2.132471  | -0.060182 |                |
| 12                                             | -0.676113 | -1.805341 | -0.033854 |                |
| 6                                              | 2.793141  | 1.001013  | 0.141827  |                |
| 6                                              | -5.098710 | -0.402252 | 0.150945  |                |
| 6                                              | -0.576294 | 2.114052  | 0.030139  |                |
| 6                                              | 2.603833  | -2.274667 | -0.240048 |                |
| 6                                              | -1.921047 | 1.974900  | -0.035154 |                |
| 6                                              | -2.515912 | -0.785350 | 0.082610  |                |
| 6                                              | -3.792827 | -0.261465 | 0.129503  |                |
| 6                                              | -3.117518 | 1.681223  | -0.182095 |                |
| 6                                              | 1.237744  | -0.859530 | -0.072718 |                |
| 6                                              | 2.660342  | -0.204202 | -0.276550 |                |
| 16                                             |           |           |           |                |
| 372.974511 Kcal/mol 16.173726 eV -100.789307 H |           |           |           | MutI_17_33.log |
| 12                                             | 0.694100  | -0.964500 | -0.035085 |                |
| 8                                              | 3.560942  | 0.500793  | 0.126360  |                |
| 6                                              | 4.683757  | 1.029081  | -0.258341 |                |
| 6                                              | 2.460164  | 0.068920  | 0.546003  |                |
| 6                                              | -2.145492 | -0.220585 | -0.242028 |                |
| 8                                              | -1.952853 | -2.752510 | 0.047082  |                |
| 6                                              | -3.556191 | 0.252024  | -0.064295 |                |
| 12                                             | 6.431981  | -0.238070 | -0.080618 |                |
| 6                                              | -2.699456 | 2.404157  | 0.087051  |                |
| 6                                              | -2.734404 | -1.536595 | -0.145105 |                |
| 6                                              | -1.327494 | 1.919666  | -0.127543 |                |
| 6                                              | -0.661011 | -2.721055 | 0.184623  |                |
| 6                                              | -1.571332 | 3.273158  | 0.179763  |                |

|            |           |           |           |                                  |
|------------|-----------|-----------|-----------|----------------------------------|
| 6          | -1.019929 | 0.574554  | -0.287064 |                                  |
| 6          | -3.740897 | 1.586581  | 0.078408  |                                  |
| 6          | -4.083997 | -1.222476 | 0.048679  |                                  |
| 16         |           |           |           |                                  |
| 373.896622 | Kcal/mol  | 16.213713 | eV        | -100.787838 H MutI_13_49.log     |
| 12         | -1.772415 | -1.090378 | 0.428001  |                                  |
| 6          | 1.184542  | 3.323288  | 0.020834  |                                  |
| 6          | 3.453542  | -0.812998 | -0.539527 |                                  |
| 6          | 0.660766  | -0.199256 | 1.109670  |                                  |
| 6          | -4.495632 | 2.638383  | -0.903597 |                                  |
| 6          | 0.479462  | 1.112624  | 0.497075  |                                  |
| 8          | 2.330965  | -1.126164 | -0.554591 |                                  |
| 8          | -0.814435 | 1.410746  | 0.233943  |                                  |
| 6          | -0.088112 | -0.975586 | 1.795107  |                                  |
| 6          | -1.524042 | -3.062120 | -0.642564 |                                  |
| 6          | 1.519704  | 2.064229  | 0.092037  |                                  |
| 6          | -3.813444 | 1.581001  | -0.436098 |                                  |
| 12         | 3.740346  | 1.371994  | -0.381683 |                                  |
| 6          | 0.357104  | -3.258698 | 0.081184  |                                  |
| 6          | -0.595788 | -3.937944 | -0.714637 |                                  |
| 6          | -3.096006 | 0.584402  | -0.024590 |                                  |
| 16         |           |           |           |                                  |
| 374.042819 | Kcal/mol  | 16.220052 | eV        | -100.787605 H Child_3_56.log     |
| 12         | 1.893579  | -2.692188 | -0.083722 |                                  |
| 8          | -0.350894 | 3.968061  | -0.853941 |                                  |
| 6          | -3.640108 | -1.294082 | 0.780397  |                                  |
| 12         | 0.397953  | 2.744249  | 0.314081  |                                  |
| 6          | -2.420157 | -1.728914 | 0.559361  |                                  |
| 6          | 2.059714  | 1.772175  | 1.291865  |                                  |
| 6          | -1.214872 | -2.058663 | 0.345193  |                                  |
| 6          | 0.387125  | 0.479839  | -1.269967 |                                  |
| 6          | -0.030920 | -1.976279 | -0.220496 |                                  |
| 6          | -4.682617 | 0.876127  | -0.357625 |                                  |
| 6          | 3.281849  | -1.334475 | -0.678646 |                                  |
| 6          | 1.025426  | 0.707124  | 1.334511  |                                  |
| 6          | 3.007911  | -0.171913 | -0.271567 |                                  |
| 6          | 2.347508  | 0.536757  | 0.723196  |                                  |
| 6          | -4.227605 | -0.374678 | -0.094464 |                                  |
| 8          | -0.006344 | -0.620916 | -1.097915 |                                  |
| 16         |           |           |           |                                  |
| 374.695857 | Kcal/mol  | 16.248371 | eV        | -100.786564 H Original3D_2_3.log |
| 6          | -1.260903 | -3.034118 | 0.841006  |                                  |
| 6          | -0.103358 | -2.677588 | 1.094380  |                                  |
| 12         | -2.132763 | -1.549008 | -0.457719 |                                  |
| 8          | -2.342627 | 3.022436  | 1.466419  |                                  |
| 6          | 2.222758  | -1.524585 | 1.106874  |                                  |
| 6          | -2.432957 | 0.305952  | -1.184782 |                                  |
| 8          | 0.994476  | 2.198834  | 1.513355  |                                  |
| 6          | -2.175195 | -3.601421 | -1.072288 |                                  |
| 6          | 1.142757  | -2.104658 | 1.263163  |                                  |
| 6          | 3.204142  | -0.686927 | 0.657298  |                                  |
| 6          | 1.098611  | 2.373495  | 0.371772  |                                  |
| 6          | 3.942202  | 0.076770  | -0.020140 |                                  |
| 6          | -2.547985 | 1.593609  | -0.627027 |                                  |

|                                                |           |           |           |                 |
|------------------------------------------------|-----------|-----------|-----------|-----------------|
| 6                                              | -2.430959 | 2.406985  | 0.474538  |                 |
| 6                                              | -2.856573 | 1.245903  | -2.064327 |                 |
| 12                                             | 4.130260  | 0.881454  | -1.949032 |                 |
| 16                                             |           |           |           |                 |
| 376.978209 Kcal/mol 16.347343 eV -100.782927 H |           |           |           | Child_17_12.log |
| 6                                              | 0.259106  | 5.046554  | 0.313582  |                 |
| 6                                              | 8.625044  | -1.379385 | 1.056025  |                 |
| 6                                              | -0.463843 | 3.986265  | 0.133508  |                 |
| 6                                              | 9.244010  | -0.845266 | 0.053431  |                 |
| 8                                              | -5.774359 | -1.819624 | 0.126655  |                 |
| 12                                             | 6.941943  | -1.184252 | -0.043028 |                 |
| 6                                              | -6.959231 | -2.220107 | 0.185389  |                 |
| 6                                              | 4.865335  | -0.948661 | -0.520894 |                 |
| 6                                              | -1.168651 | 2.921229  | -0.016173 |                 |
| 6                                              | 3.606730  | -0.734170 | -0.562898 |                 |
| 6                                              | -8.157660 | -2.798831 | 0.236824  |                 |
| 6                                              | 2.300853  | -0.480889 | -0.581084 |                 |
| 12                                             | -4.150473 | -0.902713 | -0.004269 |                 |
| 6                                              | -1.850665 | 1.868536  | -0.149371 |                 |
| 6                                              | -2.768519 | 0.793375  | -0.124019 |                 |
| 8                                              | -4.062227 | 1.043585  | -0.073951 |                 |
| 16                                             |           |           |           |                 |
| 377.440767 Kcal/mol 16.367401 eV -100.782190 H |           |           |           | Child_17_25.log |
| 6                                              | -1.195743 | -4.009749 | -0.478735 |                 |
| 6                                              | -1.441433 | 3.435527  | 0.239996  |                 |
| 6                                              | -1.886165 | -2.790817 | -0.158654 |                 |
| 6                                              | -0.111215 | 3.166715  | 0.044173  |                 |
| 6                                              | -0.445295 | -2.837374 | -0.229060 |                 |
| 6                                              | 1.125068  | 2.992158  | 0.002283  |                 |
| 6                                              | -2.862964 | -1.929544 | 0.114726  |                 |
| 12                                             | 2.842255  | 1.993868  | -0.118963 |                 |
| 6                                              | 0.680501  | -2.057047 | -0.080720 |                 |
| 8                                              | -2.199626 | 2.280462  | -0.174989 |                 |
| 6                                              | -3.524950 | -0.929458 | 0.406886  |                 |
| 6                                              | 4.075549  | 0.247192  | -0.375662 |                 |
| 6                                              | 1.564301  | -1.159439 | 0.103223  |                 |
| 6                                              | -3.047740 | 1.616148  | -0.798148 |                 |
| 8                                              | -4.067741 | 0.184017  | 0.662476  |                 |
| 12                                             | 4.871033  | -1.509009 | 0.398818  |                 |
| 16                                             |           |           |           |                 |
| 378.768844 Kcal/mol 16.424992 eV -100.780074 H |           |           |           | Child_11_54.log |
| 6                                              | 1.786303  | -2.253122 | 0.883624  |                 |
| 8                                              | -4.476898 | 0.863440  | -0.084920 |                 |
| 8                                              | 1.982535  | 2.274590  | 0.663003  |                 |
| 6                                              | -2.339647 | 2.031233  | 0.175366  |                 |
| 12                                             | 3.507446  | -1.109995 | 0.532184  |                 |
| 6                                              | -3.071259 | 0.947689  | -0.029260 |                 |
| 6                                              | 2.738882  | 1.828407  | -0.152730 |                 |
| 6                                              | -1.657066 | 3.093426  | 0.438289  |                 |
| 6                                              | 3.605206  | 1.298232  | -0.932587 |                 |
| 6                                              | -4.422781 | -0.578343 | -0.200964 |                 |
| 6                                              | 4.561997  | 0.343475  | -0.858198 |                 |
| 6                                              | -2.890729 | -0.545379 | -0.193450 |                 |
| 6                                              | 5.423310  | -0.501386 | -0.369693 |                 |
| 6                                              | -5.382126 | -1.499960 | -0.224115 |                 |

|                                                |           |           |           |                 |
|------------------------------------------------|-----------|-----------|-----------|-----------------|
| 6                                              | -1.896241 | -1.400530 | -0.271396 |                 |
| 12                                             | -0.072463 | -2.363896 | -0.050016 |                 |
| 16                                             |           |           |           |                 |
| 381.787915 Kcal/mol 16.555912 eV -100.775262 H |           |           |           | Child_13_12.log |
| 8                                              | 4.099777  | 2.796468  | 0.298608  |                 |
| 6                                              | -7.328758 | -1.295364 | -0.440634 |                 |
| 6                                              | 3.272945  | 1.925556  | 0.027225  |                 |
| 6                                              | -6.132670 | -1.186764 | -0.014497 |                 |
| 12                                             | 5.631879  | -3.213531 | 0.781525  |                 |
| 8                                              | -4.915774 | -1.145467 | 0.581754  |                 |
| 6                                              | 3.522101  | 0.559957  | -0.400836 |                 |
| 6                                              | -3.799067 | -0.695184 | 0.253531  |                 |
| 6                                              | 3.390210  | -0.630939 | -0.755759 |                 |
| 6                                              | -4.099963 | 3.598311  | 0.693272  |                 |
| 6                                              | 1.821436  | 2.021793  | 0.078733  |                 |
| 6                                              | -2.630339 | -0.302058 | 0.063213  |                 |
| 12                                             | 1.363054  | -0.956206 | -0.884647 |                 |
| 6                                              | -1.433511 | 0.165222  | -0.116295 |                 |
| 6                                              | 0.707248  | 1.504659  | -0.055903 |                 |
| 6                                              | -0.191502 | 0.472950  | -0.299622 |                 |
| 16                                             |           |           |           |                 |
| 381.803365 Kcal/mol 16.556582 eV -100.775238 H |           |           |           | MutD_14_58.log  |
| 12                                             | -5.336815 | -3.480630 | -0.674248 |                 |
| 6                                              | -1.702078 | 2.013415  | -0.359454 |                 |
| 8                                              | -3.842268 | 3.131148  | -0.164629 |                 |
| 6                                              | 3.993035  | 3.603209  | -0.587930 |                 |
| 6                                              | -3.103924 | 2.163766  | 0.014978  |                 |
| 8                                              | 4.936913  | -1.301451 | -0.477800 |                 |
| 6                                              | 0.087065  | 0.165487  | -0.158145 |                 |
| 6                                              | 7.105501  | -0.667514 | 0.870381  |                 |
| 6                                              | 1.322228  | -0.198524 | -0.255606 |                 |
| 6                                              | 3.734511  | -0.996681 | -0.340965 |                 |
| 6                                              | 2.541515  | -0.639436 | -0.293555 |                 |
| 6                                              | -3.490398 | -0.229093 | 1.186038  |                 |
| 6                                              | -0.715651 | 1.272582  | -0.395237 |                 |
| 12                                             | -1.582892 | -0.915254 | 0.816470  |                 |
| 6                                              | 6.039899  | -1.024016 | 0.271923  |                 |
| 6                                              | -3.431816 | 0.888980  | 0.619702  |                 |
| 16                                             |           |           |           |                 |
| 385.984739 Kcal/mol 16.737904 eV -100.768574 H |           |           |           | MutI_15_65.log  |
| 8                                              | 0.801118  | 1.451769  | 0.509384  |                 |
| 12                                             | 3.196627  | 1.474410  | -0.573612 |                 |
| 6                                              | -4.262991 | 0.984120  | -0.505483 |                 |
| 6                                              | 1.529897  | 0.153335  | 0.551413  |                 |
| 6                                              | -0.210102 | -1.827390 | 0.562448  |                 |
| 6                                              | 4.894793  | -1.145596 | -0.311039 |                 |
| 8                                              | 4.126474  | -0.112918 | -0.266980 |                 |
| 6                                              | -1.072498 | 3.146930  | 0.309701  |                 |
| 6                                              | 5.532972  | -2.290927 | -0.231757 |                 |
| 6                                              | -0.167247 | 2.260315  | 0.398289  |                 |
| 6                                              | 0.581159  | -0.850534 | 0.530875  |                 |
| 6                                              | -1.371838 | -2.498602 | 0.429186  |                 |
| 6                                              | -5.151494 | 0.109201  | -0.744284 |                 |
| 6                                              | -2.541771 | -3.007944 | 0.207256  |                 |
| 12                                             | -4.167763 | -1.629483 | -0.280534 |                 |

|            |           |           |            |                                   |
|------------|-----------|-----------|------------|-----------------------------------|
| 6          | -2.388730 | 3.492104  | 0.188479   |                                   |
| 16         |           |           |            |                                   |
| 390.489999 | Kcal/mol  | 16.933270 | eV         | -100.761395 H MutI_15_73.log      |
| 6          | -1.101718 | 3.383388  | 0.815942   |                                   |
| 6          | 3.660441  | -0.476541 | -0.053765  |                                   |
| 6          | 2.687486  | -0.084254 | -0.806120  |                                   |
| 12         | -2.756614 | -0.704091 | 0.386829   |                                   |
| 6          | -0.824818 | 1.513497  | -1.831269  |                                   |
| 6          | -0.719318 | 0.397315  | -0.938912  |                                   |
| 6          | -0.681683 | 0.066819  | 0.436663   |                                   |
| 8          | -1.544318 | 2.452563  | 1.268944   |                                   |
| 6          | -6.631154 | -2.322940 | 0.219214   |                                   |
| 6          | 0.339045  | 0.585818  | -1.711095  |                                   |
| 6          | 1.647954  | 0.315099  | -1.466794  |                                   |
| 12         | -4.839748 | -1.161238 | -0.047173  |                                   |
| 8          | 0.393928  | 0.061911  | 1.101580   |                                   |
| 6          | 7.387198  | -1.227087 | 0.606851   |                                   |
| 6          | 4.855279  | -0.755561 | 0.302684   |                                   |
| 6          | 6.107864  | -1.017527 | 0.586588   |                                   |
| 16         |           |           |            |                                   |
| 391.833384 | Kcal/mol  | 16.991525 | eV         | -100.759254 H OriginalID_11_0.log |
| 6          | 0.000000  | 0.000000  | 8.598351   |                                   |
| 12         | 0.000000  | 0.000000  | 10.502546  |                                   |
| 6          | 0.000000  | 0.000000  | 7.299133   |                                   |
| 6          | 0.000000  | 0.000000  | 5.993999   |                                   |
| 12         | 0.000000  | 0.000000  | 4.052634   |                                   |
| 6          | 0.000000  | 0.000000  | 1.971168   |                                   |
| 8          | 0.000000  | 0.000000  | 0.698465   |                                   |
| 6          | 0.000000  | 0.000000  | -0.577471  |                                   |
| 6          | 0.000000  | 0.000000  | -1.813028  |                                   |
| 6          | 0.000000  | 0.000000  | -3.153602  |                                   |
| 6          | 0.000000  | 0.000000  | -4.396500  |                                   |
| 6          | 0.000000  | 0.000000  | -5.727236  |                                   |
| 6          | 0.000000  | 0.000000  | -6.962461  |                                   |
| 8          | 0.000000  | 0.000000  | -8.186387  |                                   |
| 6          | 0.000000  | 0.000000  | -9.543057  |                                   |
| 6          | 0.000000  | 0.000000  | -10.815762 |                                   |
| 16         |           |           |            |                                   |
| 392.208988 | Kcal/mol  | 17.007813 | eV         | -100.758655 H Child_12_47.log     |
| 6          | -0.420835 | 2.109930  | -0.442633  |                                   |
| 6          | -7.199369 | -2.786296 | -0.126294  |                                   |
| 6          | 2.602855  | 1.071175  | 1.129865   |                                   |
| 8          | -6.473906 | -2.775726 | 0.766106   |                                   |
| 12         | 0.540119  | 1.731762  | 1.474213   |                                   |
| 6          | 1.233071  | -2.060467 | -0.377317  |                                   |
| 6          | -1.414290 | 3.187842  | -0.367597  |                                   |
| 6          | 0.318324  | -1.624010 | -1.094728  |                                   |
| 12         | 2.034869  | 0.608842  | -1.586523  |                                   |
| 6          | 2.221847  | -1.486819 | 0.457517   |                                   |
| 6          | -0.473407 | 0.719262  | -0.600277  |                                   |
| 6          | 2.096299  | -0.107727 | 0.960534   |                                   |
| 6          | -5.138504 | 4.282146  | 0.020831   |                                   |
| 6          | -0.236832 | -0.333368 | -1.334161  |                                   |
| 6          | 3.581783  | -1.561637 | 0.360297   |                                   |

|    |                     |              |               |                 |
|----|---------------------|--------------|---------------|-----------------|
| 8  | 4.733216            | -1.792705    | 0.462832      |                 |
| 16 |                     |              |               |                 |
|    | 396.449810 Kcal/mol | 17.191713 eV | -100.751897 H | Child_7_47.log  |
| 6  | -0.185689           | -3.068701    | 0.250770      |                 |
| 6  | 0.191887            | 4.858094     | 0.414164      |                 |
| 8  | -4.402446           | -1.447109    | -0.178074     |                 |
| 6  | 0.196177            | 3.592243     | 0.073926      |                 |
| 6  | -1.100135           | -2.207189    | 0.254506      |                 |
| 6  | 0.927525            | 2.252805     | -0.021430     |                 |
| 12 | 1.826843            | -3.024860    | 0.029319      |                 |
| 6  | -0.343906           | 2.304812     | -0.490612     |                 |
| 6  | -3.370693           | -0.823726    | 0.032269      |                 |
| 6  | 1.637231            | 1.085814     | 0.473144      |                 |
| 6  | -1.924347           | -1.116610    | 0.203183      |                 |
| 6  | 3.739916            | -0.245471    | -0.157389     |                 |
| 6  | -3.102512           | 0.656169     | 0.112835      |                 |
| 6  | 2.502238            | 0.181774     | -0.110891     |                 |
| 8  | 4.818727            | -0.774419    | -0.181185     |                 |
| 12 | -1.688210           | 0.770872     | -0.307050     |                 |
| 16 |                     |              |               |                 |
|    | 398.348036 Kcal/mol | 17.274028 eV | -100.748872 H | MutI_16_39.log  |
| 6  | 5.018483            | 1.371716     | -0.668769     |                 |
| 6  | -5.872377           | 1.213427     | -0.065719     |                 |
| 6  | 7.395256            | 2.102230     | -1.338690     |                 |
| 6  | 14.643474           | -2.098158    | 0.565720      |                 |
| 8  | -4.350830           | 3.139548     | 0.722726      |                 |
| 6  | -5.123005           | 2.118119     | 0.300218      |                 |
| 6  | -7.976699           | -2.192272    | -0.167585     |                 |
| 6  | -3.003926           | 3.046638     | 0.731067      |                 |
| 6  | -1.738587           | 2.966164     | 0.639400      |                 |
| 6  | 6.210401            | 1.753397     | -1.016791     |                 |
| 12 | -7.994861           | -4.218131    | -0.242218     |                 |
| 8  | 3.928480            | 1.042687     | -0.382678     |                 |
| 6  | -9.127294           | -1.610246    | -0.086326     |                 |
| 12 | -6.559978           | -0.683009    | 0.043713      |                 |
| 6  | 13.597104           | -1.663205    | -0.034065     |                 |
| 6  | 15.649980           | -2.781845    | 1.085152      |                 |
| 16 |                     |              |               |                 |
|    | 399.392850 Kcal/mol | 17.319335 eV | -100.747207 H | Child_12_26.log |
| 8  | -6.924519           | 1.661805     | 0.026949      |                 |
| 6  | 3.600704            | 2.075573     | 0.039562      |                 |
| 6  | -5.830142           | 1.211549     | 0.011810      |                 |
| 6  | 3.441713            | 3.314750     | 0.433233      |                 |
| 6  | -4.652145           | 0.693570     | 0.014864      |                 |
| 6  | 3.754672            | 0.857928     | -0.352470     |                 |
| 6  | -3.544003           | 0.089952     | -0.076619     |                 |
| 12 | 4.548810            | -1.124715    | -0.256229     |                 |
| 12 | -1.126349           | -3.469900    | 0.619502      |                 |
| 6  | 2.830235            | 4.420599     | 0.732216      |                 |
| 6  | -2.426204           | -0.592594    | -0.260590     |                 |
| 8  | 2.942665            | -0.124453    | -0.916437     |                 |
| 6  | -1.751066           | -1.764804    | -0.612820     |                 |
| 6  | 3.813791            | -2.803125    | 0.817582      |                 |
| 6  | -0.984989           | -0.401722    | -0.244465     |                 |
| 6  | 0.211651            | 0.037752     | -0.042865     |                 |

16

402.623437 Kcal/mol 17.459427 eV -100.742059 H

Original3D\_7\_7.log

|    |           |           |           |
|----|-----------|-----------|-----------|
| 6  | -0.343843 | -1.359160 | 0.428682  |
| 6  | -2.581613 | 1.052386  | -1.024529 |
| 8  | -0.370924 | 1.656363  | -1.692433 |
| 6  | 0.404267  | -0.466179 | 0.558557  |
| 6  | -2.651067 | 1.138687  | 0.385075  |
| 6  | 2.533829  | 0.593618  | -0.126253 |
| 6  | -2.862807 | 0.829822  | 1.645929  |
| 6  | 3.682863  | 0.769947  | -0.708945 |
| 12 | 3.450837  | -1.485295 | -0.812621 |
| 6  | -1.322621 | -2.402715 | 0.252509  |
| 6  | -0.934195 | -3.543151 | 0.618830  |
| 6  | -1.490220 | 1.613919  | -1.626987 |
| 8  | 0.978561  | 1.966819  | 1.264870  |
| 12 | -2.619819 | -0.953237 | -0.547787 |
| 6  | 1.396458  | 0.556585  | 0.737592  |
| 6  | 1.696732  | 1.262397  | 2.150440  |

16

404.287414 Kcal/mol 17.531584 eV -100.739407 H

Child\_10\_10.log

|    |           |           |           |
|----|-----------|-----------|-----------|
| 8  | 5.671795  | -1.411522 | -0.304876 |
| 6  | -0.041234 | 4.799865  | -0.583984 |
| 6  | 4.553010  | -1.744916 | -0.242716 |
| 12 | -1.194798 | 2.933445  | -0.331671 |
| 6  | 3.340597  | -2.120934 | -0.146036 |
| 6  | 0.851027  | 4.174441  | -0.158852 |
| 6  | 2.107629  | -2.391858 | 0.036579  |
| 6  | -2.310071 | 1.104250  | -0.365524 |
| 6  | 0.854517  | -2.572792 | 0.214449  |
| 6  | 1.338115  | 2.909823  | 0.535319  |
| 6  | -0.419532 | -2.414292 | 0.267431  |
| 6  | -2.657692 | -0.096468 | -0.222061 |
| 6  | -1.693973 | -2.150453 | 0.208052  |
| 6  | -2.665967 | -1.445155 | -0.000908 |
| 8  | 0.439583  | 2.624511  | 1.236476  |
| 12 | -4.507668 | -2.767861 | -0.060270 |

16

404.451305 Kcal/mol 17.538691 eV -100.739146 H

MutI\_16\_63.log

|    |           |           |           |
|----|-----------|-----------|-----------|
| 12 | 5.776796  | -0.970907 | -0.039182 |
| 6  | 2.168624  | 2.811912  | 0.080983  |
| 6  | 2.092628  | -0.788627 | 0.016833  |
| 6  | 2.118755  | 0.455574  | 0.009175  |
| 12 | -5.348960 | -0.314801 | -0.041113 |
| 6  | 4.384074  | -2.503113 | 0.061855  |
| 8  | -6.993299 | -0.566801 | 0.022743  |
| 6  | -8.177634 | -0.749324 | 0.055845  |
| 6  | -1.223098 | 0.766377  | -0.009247 |
| 6  | -2.473950 | 0.406800  | -0.052836 |
| 6  | 1.261634  | 1.611129  | 0.035643  |
| 6  | -3.670751 | 0.063120  | -0.049768 |
| 6  | 4.576456  | 0.410509  | -0.044174 |
| 6  | -0.061077 | 1.166832  | 0.011112  |
| 6  | 2.739975  | -1.831897 | 0.048620  |
| 8  | 3.549819  | 1.130894  | -0.025331 |



16  
405.851070 Kcal/mol 17.599390 eV -100.736915 H  
Original1D\_16\_0.log

|    |          |          |            |
|----|----------|----------|------------|
| 6  | 0.000000 | 0.000000 | 0.901632   |
| 6  | 0.000000 | 0.000000 | 2.215708   |
| 6  | 0.000000 | 0.000000 | -0.334540  |
| 6  | 0.000000 | 0.000000 | 3.387709   |
| 6  | 0.000000 | 0.000000 | -1.589785  |
| 8  | 0.000000 | 0.000000 | -2.796446  |
| 12 | 0.000000 | 0.000000 | 5.051973   |
| 8  | 0.000000 | 0.000000 | -4.590991  |
| 6  | 0.000000 | 0.000000 | -5.802106  |
| 6  | 0.000000 | 0.000000 | -7.047347  |
| 12 | 0.000000 | 0.000000 | 7.632196   |
| 6  | 0.000000 | 0.000000 | -8.312925  |
| 6  | 0.000000 | 0.000000 | 10.125446  |
| 6  | 0.000000 | 0.000000 | 11.470254  |
| 6  | 0.000000 | 0.000000 | -9.615125  |
| 6  | 0.000000 | 0.000000 | -10.917344 |

16  
409.643098 Kcal/mol 17.763828 eV -100.730872 H  
Original3D\_0\_45.log

|    |           |           |           |
|----|-----------|-----------|-----------|
| 6  | 0.802996  | 0.891055  | -0.313265 |
| 12 | 0.479328  | -1.373752 | -0.206865 |
| 12 | -2.906670 | 0.862243  | 0.647815  |
| 6  | 3.763984  | -1.582315 | 0.759496  |
| 8  | -2.220074 | 2.252552  | 1.934331  |
| 6  | 1.682794  | 1.769247  | -0.824095 |
| 6  | -3.210162 | -1.943323 | -0.197025 |
| 6  | 4.285474  | -0.627499 | 0.051348  |
| 6  | -1.139140 | 2.667394  | -0.043297 |
| 6  | -4.276610 | -1.491853 | -1.560116 |
| 6  | -4.044023 | -0.792523 | -0.430968 |
| 6  | -0.323162 | 1.679900  | 0.034425  |
| 6  | 3.911639  | -2.636249 | 1.539423  |
| 6  | 2.602566  | 2.663002  | -1.473376 |
| 6  | -2.451900 | -2.966790 | -0.232265 |
| 8  | 4.657745  | 0.292177  | -0.578471 |

16  
409.941580 Kcal/mol 17.776772 eV -100.730397 H Child\_14\_24.log

|    |           |           |           |
|----|-----------|-----------|-----------|
| 12 | 4.119598  | -0.811339 | -0.112763 |
| 8  | -6.323407 | -0.433956 | 0.014051  |
| 8  | 3.879360  | 0.966761  | -0.079638 |
| 6  | -5.193891 | -0.108496 | -0.176162 |
| 12 | 2.249056  | 1.725417  | -0.032549 |
| 6  | -3.833157 | 0.026380  | -0.317905 |
| 6  | 2.597132  | -2.168297 | -0.086430 |
| 6  | 1.340612  | -2.171868 | -0.019836 |
| 6  | 0.323774  | 1.140020  | -0.014153 |
| 6  | -1.397285 | 2.694942  | 0.159730  |
| 6  | -0.632836 | -1.318629 | -0.055905 |
| 6  | -1.214149 | -2.687518 | 0.159819  |
| 6  | -0.593126 | 0.087737  | -0.031182 |
| 6  | 0.015069  | 2.941827  | 0.273623  |
| 6  | -1.161315 | 1.455866  | 0.031019  |

|                                                |           |           |           |                 |
|------------------------------------------------|-----------|-----------|-----------|-----------------|
| 6                                              | 0.270591  | -2.430528 | 0.455454  |                 |
| 16                                             |           |           |           |                 |
| 410.321570 Kcal/mol 17.793250 eV -100.729791 H |           |           |           | Child_15_29.log |
| 6                                              | 8.841972  | 0.320001  | -0.529833 |                 |
| 6                                              | -3.648887 | 2.864162  | -0.556762 |                 |
| 6                                              | 7.571287  | 0.158428  | -0.317308 |                 |
| 6                                              | -3.998273 | 1.804007  | -1.148350 |                 |
| 6                                              | 6.289693  | -0.003700 | -0.098471 |                 |
| 12                                             | -2.178482 | 2.402263  | 0.825872  |                 |
| 6                                              | 5.080617  | -0.152854 | 0.123004  |                 |
| 6                                              | -4.098345 | 0.530714  | -1.540778 |                 |
| 8                                              | 3.876094  | -0.299541 | 0.355100  |                 |
| 6                                              | -3.823214 | -0.689943 | -1.587281 |                 |
| 12                                             | 1.672054  | -0.729008 | 0.623879  |                 |
| 6                                              | -0.258189 | -0.468017 | 0.917516  |                 |
| 6                                              | -3.305258 | -1.891555 | -1.416327 |                 |
| 6                                              | -1.523947 | -0.343128 | 1.111132  |                 |
| 6                                              | -2.641784 | -2.959775 | -1.087008 |                 |
| 8                                              | -6.480706 | -1.586598 | 2.068121  |                 |
| 16                                             |           |           |           |                 |
| 410.620513 Kcal/mol 17.806213 eV -100.729315 H |           |           |           | Child_1_47.log  |
| 12                                             | 3.461971  | 0.243883  | -0.738133 |                 |
| 6                                              | -6.167751 | 1.208000  | 0.093196  |                 |
| 6                                              | 2.874241  | -1.354125 | 0.582691  |                 |
| 6                                              | -4.947984 | 0.671086  | -0.052272 |                 |
| 6                                              | 1.301916  | 3.535637  | 1.831631  |                 |
| 6                                              | -3.775557 | 0.207385  | -0.188995 |                 |
| 8                                              | 1.381288  | 4.187753  | 0.845974  |                 |
| 12                                             | -1.831610 | -0.665912 | -0.552999 |                 |
| 6                                              | 1.661254  | -1.844345 | 0.412541  |                 |
| 6                                              | 1.627828  | 1.225331  | -1.721032 |                 |
| 8                                              | -0.596477 | -1.796856 | 0.264531  |                 |
| 6                                              | 0.705697  | -0.534970 | -0.155983 |                 |
| 6                                              | 0.515214  | 0.147782  | -1.448949 |                 |
| 6                                              | 1.231762  | 0.792841  | -0.323285 |                 |
| 6                                              | 0.412216  | -2.573502 | 0.791531  |                 |
| 6                                              | 0.254028  | -3.824924 | 1.280517  |                 |
| 16                                             |           |           |           |                 |
| 413.563645 Kcal/mol 17.933840 eV -100.724624 H |           |           |           | Child_4_16.log  |
| 6                                              | -8.166932 | 0.403060  | -0.700072 |                 |
| 8                                              | 4.448123  | 2.302526  | 0.865981  |                 |
| 6                                              | -6.895686 | 0.291663  | -0.423921 |                 |
| 6                                              | 3.486445  | -1.570292 | 0.366417  |                 |
| 6                                              | -5.632469 | 0.180724  | -0.148761 |                 |
| 6                                              | 3.833436  | 1.726347  | -0.022776 |                 |
| 6                                              | -4.398321 | 0.072404  | 0.124702  |                 |
| 12                                             | 3.414934  | -0.998796 | -1.588319 |                 |
| 6                                              | -3.142019 | -0.038450 | 0.415873  |                 |
| 6                                              | 3.165813  | 1.021180  | -0.962163 |                 |
| 6                                              | -1.927724 | -0.143400 | 0.711668  |                 |
| 6                                              | 2.568773  | -1.841643 | 1.214730  |                 |
| 8                                              | -0.754108 | -0.238932 | 0.996997  |                 |
| 6                                              | 2.003529  | 0.538585  | -1.081921 |                 |
| 12                                             | 1.122306  | -0.464252 | 1.205984  |                 |
| 6                                              | 1.105322  | -0.465541 | -1.213075 |                 |

```

16
413.571243 Kcal/mol 17.934169 eV -100.724612 H      Child_8_37.log
12   5.838667   -1.138823   -0.532623
6    -4.634798   -1.011548   -0.121830
6    2.689732    2.400253    0.199612
12  -4.208985    0.983762    -0.130430
6    2.475952    1.083705    0.344580
6   -3.709849   -1.809743   -0.316301
6    1.908189    0.013739    0.100697
6   -2.692933    2.271466   -0.234669
6    1.214571   -1.091474   -0.040982
6   -2.376588   -2.110801   -0.235799
6    0.482992   -2.322045   -0.223241
6   -1.414498    2.446219   -0.119936
6   -1.100992   -1.916711   -0.188089
6   -1.078677    0.488454    1.017712
8    1.462933   -2.038560    1.031476
8    2.270219    3.440017   -0.173213
16
415.849718 Kcal/mol 18.032973 eV -100.720981 H
Original3D_0_77.log
6    2.149702   -0.923502   -0.410963
6   -1.150992    0.027453    1.352585
6   -1.991846    0.974680    0.891978
6    5.823423    0.288522   -0.820386
12  -3.375586    2.351830    0.075207
6    2.535080   -3.398837    0.151905
6    5.834952    1.473441   -0.279531
6   -0.840681    1.269657    1.904344
8    2.036164    0.239872   -0.501514
6    2.301526   -2.188042   -0.229907
12  -3.547261   -0.452116   -0.944429
8   -0.869023   -1.301327    1.198033
6   -2.628681   -2.248654   -0.448607
6    5.905421    2.671848    0.195844
6   -3.899806    1.560290   -1.846998
6   -1.748589   -1.891010    0.349489
16
416.454478 Kcal/mol 18.059198 eV -100.720018 H      MutD_14_32.log
8    5.982023   -1.735528   -0.718117
12  -4.893369   -4.010010   -0.619975
8   -4.757571    2.469644   -0.209022
6   -0.139444    0.703785   -0.085811
6    3.539633    0.970965    1.038671
6   -3.837469    0.342176    0.489656
6    3.813267    3.747327   -1.117674
6   -1.217781    1.539720   -0.298125
6   -3.526156   -0.802881    0.889291
6    2.412901    0.779149    0.417993
6    1.147249    0.780107    0.084798
12  -1.512356   -0.905446    0.527488
6    6.995426   -1.521035   -0.141219
6    8.183559   -1.319189    0.503847
6   -2.392208    1.929568   -0.323350
6   -3.800132    1.702398   -0.036918

```

16  
416.633966 Kcal/mol 18.066982 eV -100.719732 H Child\_11\_34.log  
6 -2.216502 -3.133938 0.103966  
8 2.791888 3.827048 -0.258859  
6 -0.994208 -3.597797 0.155163  
6 2.471008 2.703716 -0.165966  
6 -3.297693 -2.559612 -0.256466  
6 4.708977 0.094590 0.132595  
6 0.306193 -3.469957 0.204561  
6 2.204300 1.393332 -0.050829  
8 -3.652467 3.665644 0.419927  
6 3.328061 0.506136 0.056378  
6 -3.908205 2.504172 0.186079  
6 3.573680 -0.828905 0.125760  
12 -4.125978 -0.672462 -0.280703  
6 0.864501 0.901780 -0.040368  
6 -4.169036 1.270945 -0.071524  
12 3.264160 -2.214896 -0.016351

16  
418.888034 Kcal/mol 18.164727 eV -100.716140 H Child\_4\_32.log  
8 -4.065906 -1.327609 -1.091940  
6 4.662950 2.483576 0.048947  
6 0.997897 -2.452751 -0.536108  
6 3.751457 1.604766 -0.322814  
6 -3.526284 -0.290284 -0.759990  
12 -2.266600 2.389789 0.770308  
6 -0.182728 -1.146016 1.328457  
8 0.592847 -1.206545 2.311463  
6 0.119460 -1.898165 0.267193  
6 -3.429943 0.659320 0.264391  
6 -2.385028 0.460537 -1.234610  
6 2.383907 1.200325 -0.958236  
6 -0.999502 -0.013613 1.434813  
6 -1.302819 1.269786 -1.066162  
12 2.902572 -1.754158 -0.576501  
6 3.269432 0.230127 -0.479526

16  
418.914893 Kcal/mol 18.165892 eV -100.716097 H Child\_11\_26.log  
8 -0.671972 3.651832 -0.108362  
12 -2.839035 -0.511183 -1.483766  
8 4.505883 1.554441 0.173202  
6 -0.382710 -2.232379 -0.147073  
6 -1.152432 2.557777 -0.011718  
6 3.435637 -1.974976 -0.969915  
6 3.629750 0.736830 0.120077  
6 -0.563504 -0.412992 -1.441485  
6 -1.569537 1.342151 -0.022003  
6 0.966800 -2.020104 -0.101440  
6 2.703340 -0.164454 -0.072549  
6 -0.531281 -0.645362 -0.104406  
12 -0.999444 -0.993157 1.865343  
6 -2.474233 0.467795 0.491365  
6 -3.227350 -0.621711 0.976012  
6 1.730598 -0.965592 0.433526

419.075724 Kcal/mol 18.172866 eV -100.715840 H

Original3D\_16\_5.log

|    |           |           |           |
|----|-----------|-----------|-----------|
| 6  | 3.106149  | 0.301985  | -0.282514 |
| 8  | 1.995053  | -2.508412 | -0.436396 |
| 6  | 1.931273  | 2.504649  | -0.924931 |
| 8  | -0.823399 | -2.338720 | 0.768985  |
| 6  | 1.333266  | -1.577890 | -0.192615 |
| 6  | 4.187556  | -0.345198 | -0.563976 |
| 6  | 1.475776  | 0.614810  | 1.076320  |
| 6  | 0.748775  | 2.448600  | -0.391866 |
| 6  | 0.564914  | -0.521399 | 0.579192  |
| 6  | -0.337192 | 2.439824  | 0.398103  |
| 6  | -0.230263 | -1.504443 | 1.450170  |
| 12 | -1.191682 | -0.983369 | -0.730440 |
| 6  | -3.476333 | -1.130264 | -0.313272 |
| 6  | 2.133242  | 1.249770  | -0.091533 |
| 6  | -1.164733 | 2.705024  | 1.346616  |
| 12 | -4.725636 | 0.622057  | -0.536134 |

16

420.299629 Kcal/mol 18.225940 eV -100.713890 H

Child\_7\_11.log

|    |           |           |           |
|----|-----------|-----------|-----------|
| 6  | -3.745911 | -0.824442 | 1.901294  |
| 6  | 2.493494  | 2.250395  | 0.221616  |
| 6  | -3.167548 | -0.963746 | 0.771300  |
| 12 | 3.605633  | 0.534648  | 0.031042  |
| 8  | -2.516575 | -1.653034 | -1.457846 |
| 6  | 1.346652  | 2.778894  | 0.154790  |
| 6  | -2.483411 | -0.990241 | -0.412359 |
| 6  | 3.874102  | -1.438609 | -0.021600 |
| 6  | -1.320191 | 0.127667  | -0.352051 |
| 6  | 0.092641  | 3.108007  | 0.047998  |
| 6  | 0.462061  | -1.619253 | -0.072508 |
| 6  | -1.158877 | 3.254119  | -0.136497 |
| 6  | 1.474665  | -2.325525 | 0.159709  |
| 6  | 3.008041  | -2.312307 | 0.243050  |
| 8  | -2.330037 | 3.422191  | -0.336816 |
| 12 | -0.812417 | -2.236567 | -0.086971 |

16

422.812990 Kcal/mol 18.334930 eV -100.709885 H

MutI\_18\_59.log

|    |           |           |           |
|----|-----------|-----------|-----------|
| 6  | -4.895280 | -0.087987 | 0.188304  |
| 6  | 3.767151  | -1.581631 | 0.401433  |
| 12 | -1.918393 | -0.433910 | -0.002480 |
| 6  | 0.992798  | -0.478105 | -0.377034 |
| 6  | 1.758832  | 2.458192  | -0.299363 |
| 6  | 3.208777  | 0.914034  | 0.241445  |
| 6  | 1.808981  | 1.013908  | -0.179501 |
| 6  | -3.652152 | -0.196027 | 0.160407  |
| 6  | 3.542218  | -2.810561 | 0.182661  |
| 8  | -6.099027 | 0.204161  | 0.114958  |
| 8  | -0.258465 | -0.521510 | -0.298956 |
| 6  | -7.353508 | 0.395500  | 0.105184  |
| 6  | 3.806055  | -0.230496 | 0.512462  |
| 6  | 1.982379  | 3.766115  | -0.376509 |
| 12 | 1.823374  | -2.454330 | -0.355614 |
| 6  | 3.700443  | 3.036668  | 0.402031  |

16

424.502551 Kcal/mol 18.408196 eV -100.707192 H Child\_14\_9.log

|    |           |           |           |
|----|-----------|-----------|-----------|
| 6  | -4.651020 | -1.593211 | -0.075231 |
| 6  | 2.591167  | 1.751329  | 1.448820  |
| 6  | -4.444285 | -0.332399 | -0.217843 |
| 12 | 3.849419  | 1.801223  | -0.622510 |
| 12 | -2.637004 | -1.823744 | 0.235018  |
| 6  | 2.854994  | 0.597166  | 0.919106  |
| 6  | -4.042136 | 0.945199  | -0.338055 |
| 6  | 2.773968  | -0.733070 | 0.366645  |
| 6  | -3.614055 | 2.147488  | -0.520934 |
| 6  | 2.744946  | -2.047178 | -0.341001 |
| 6  | -0.865925 | -0.861517 | 0.789050  |
| 6  | -1.055546 | 2.339414  | 0.132403  |
| 8  | 3.135206  | -2.730572 | -1.296249 |
| 6  | 0.271442  | -1.455960 | 0.550825  |
| 6  | 1.728489  | -1.614815 | 0.398207  |
| 8  | -0.672858 | 3.407519  | -0.456507 |

16

426.054911 Kcal/mol 18.475513 eV -100.704718 H

Original3D\_0\_71.log

|    |           |           |           |
|----|-----------|-----------|-----------|
| 6  | -0.677806 | 0.653934  | 0.684476  |
| 6  | 0.432252  | 0.472023  | 1.518247  |
| 6  | 1.638159  | 0.331903  | 1.737520  |
| 6  | 4.179420  | 0.186789  | 1.220664  |
| 8  | -1.882978 | 0.811312  | 0.967845  |
| 6  | -0.822930 | -1.315232 | -1.324350 |
| 6  | 2.972563  | 0.211980  | 1.590655  |
| 6  | -2.879610 | 1.804133  | -0.713509 |
| 6  | -1.245542 | -3.475155 | -0.117660 |
| 6  | -5.037958 | 1.761788  | 0.689762  |
| 6  | -1.287919 | -4.611882 | 0.483527  |
| 12 | 0.233544  | 0.744810  | -1.340887 |
| 6  | -4.006788 | 2.013649  | -0.077264 |
| 12 | 3.958066  | 0.540289  | -0.824047 |
| 6  | 2.252743  | 1.435370  | -1.686319 |
| 8  | -1.041877 | -2.340936 | -0.724756 |

16

431.258316 Kcal/mol 18.701154 eV -100.696426 H

Original3D\_14\_7.log

|    |           |           |           |
|----|-----------|-----------|-----------|
| 6  | 0.295657  | -0.885716 | 0.270389  |
| 6  | -0.167325 | -0.491270 | -0.971807 |
| 8  | -1.421289 | -0.146510 | -1.269770 |
| 6  | 1.435205  | 1.642891  | -0.183789 |
| 6  | -3.510992 | -2.849240 | 0.301387  |
| 6  | 0.829308  | 2.830655  | 0.109661  |
| 8  | 2.468020  | -1.993831 | 0.960616  |
| 12 | -0.996616 | 1.555596  | 0.008598  |
| 6  | -3.230797 | -1.560051 | 0.066142  |
| 6  | -2.824052 | -0.298048 | -0.124546 |
| 12 | 2.869098  | -1.483306 | -0.873604 |
| 6  | -3.273559 | 0.917439  | 0.299807  |
| 6  | 3.121190  | 0.841798  | -0.419060 |
| 6  | 1.441256  | -1.183814 | 1.049592  |
| 6  | 0.876634  | 0.064280  | 1.309214  |
| 6  | -0.133130 | 3.680284  | 0.435228  |

16  
431.302777 Kcal/mol 18.703082 eV -100.696355 H MutD\_18\_78.log  
6 -0.365299 -0.703288 -0.016556  
6 1.213252 2.272596 1.396937  
6 0.540669 0.557631 -0.100123  
6 1.933435 -0.758687 0.547393  
6 -0.431211 1.434055 -0.687821  
6 3.194339 -0.587058 0.086922  
8 4.500299 -2.606933 -0.642653  
6 -6.699114 -1.244469 0.341995  
12 3.035902 1.586036 -0.255794  
6 0.480374 -1.249312 0.953946  
12 -2.470089 0.044394 -0.293011  
6 -1.183508 2.225197 -1.549250  
6 -5.484259 -0.781690 0.121412  
8 -4.300391 -0.368199 -0.096152  
6 3.884385 -1.660252 -0.297623  
6 1.518767 1.201258 1.285452

16  
431.522474 Kcal/mol 18.712609 eV -100.696005 H Child\_2\_10.log  
6 3.163155 -2.766036 0.911527  
6 -8.331176 0.160402 0.628548  
6 3.326306 -1.563788 1.549287  
12 -6.170970 0.176456 0.278764  
6 2.788722 -3.454263 -0.101045  
6 -4.170179 0.139829 -0.057794  
6 3.207513 -0.333508 1.316569  
8 -2.951031 0.025867 -0.265800  
8 3.020189 4.005024 0.652752  
6 -1.704935 -0.303218 -0.536488  
6 2.918324 3.043967 -0.081411  
6 -0.515028 -0.724735 -0.767132  
6 2.838696 0.439553 0.298993  
6 2.645488 2.181295 -1.029363  
6 2.491379 0.728290 -0.946468  
12 1.795732 -1.637611 -1.129344

16  
433.753359 Kcal/mol 18.809350 eV -100.692450 H MutI\_8\_79.log  
6 -0.423959 0.355552 -1.116864  
6 2.344527 1.817414 0.298665  
6 1.841735 -0.319969 0.041708  
12 -2.604439 -0.244802 -0.362729  
8 2.662923 -2.541186 0.470171  
6 -4.205178 1.376065 2.001367  
8 1.263149 1.863662 -0.439914  
6 3.496442 2.079968 1.061395  
6 -3.598674 0.825268 1.000321  
12 -0.311841 -2.857484 -0.190602  
6 -0.863998 2.561633 -0.861191  
6 0.901796 0.492873 -0.604662  
6 1.749034 -1.781880 0.085293  
6 2.800549 0.625718 0.736299  
6 -2.344040 -2.335969 0.021545  
6 -1.100438 1.411263 -1.597558

16

434.147705 Kcal/mol 18.826450 eV -100.691822 H Child\_4\_43.log

|    |           |           |           |
|----|-----------|-----------|-----------|
| 12 | 1.033927  | -1.998180 | 0.274488  |
| 6  | -0.053482 | 3.067308  | -0.616784 |
| 6  | 2.292415  | -1.012771 | -1.250682 |
| 6  | -5.657953 | -0.046008 | 0.281115  |
| 6  | 2.920508  | -0.439123 | -0.056907 |
| 6  | -1.224900 | 1.553384  | -0.520037 |
| 6  | 3.839248  | 0.576040  | -0.012573 |
| 6  | -4.513605 | -0.517534 | -0.029005 |
| 6  | -0.951970 | -1.077731 | 0.586113  |
| 12 | -2.690902 | -0.265550 | -0.790944 |
| 6  | 1.331694  | -1.181240 | -2.012435 |
| 6  | 0.087929  | 2.032749  | 0.246760  |
| 6  | 4.016186  | 1.870753  | 0.315197  |
| 6  | -0.691070 | 0.897012  | 0.578340  |
| 8  | 2.408775  | -0.914233 | 1.068594  |
| 8  | -0.969562 | 0.017699  | 1.574263  |

16

434.183273 Kcal/mol 18.827992 eV -100.691765 H MutD\_16\_66.log

|    |            |           |           |
|----|------------|-----------|-----------|
| 6  | -11.292864 | -0.450573 | 0.520052  |
| 6  | 10.078158  | 0.139437  | 0.511660  |
| 6  | -5.757892  | 0.565766  | -0.444212 |
| 6  | -10.006997 | -0.511089 | -0.096125 |
| 12 | -3.133146  | 0.768895  | 0.179616  |
| 6  | -7.122846  | -0.035843 | -0.076003 |
| 6  | -8.436679  | -0.107356 | -0.059110 |
| 6  | 7.228641   | -0.112151 | -0.057501 |
| 8  | 5.918205   | -0.116809 | -0.075760 |
| 6  | 11.143871  | -0.150713 | -0.118129 |
| 6  | 3.405265   | -0.108404 | -0.070876 |
| 6  | 2.124970   | -0.107615 | -0.069980 |
| 12 | 0.046375   | -0.076804 | -0.057118 |
| 6  | 8.493270   | -0.095876 | -0.012341 |
| 8  | -4.694497  | -0.106189 | -0.073186 |
| 6  | 4.685035   | -0.112436 | -0.073837 |

16

434.595329 Kcal/mol 18.845861 eV -100.691108 H Child\_18\_9.log

|    |           |           |           |
|----|-----------|-----------|-----------|
| 6  | -4.700999 | -2.385248 | -0.454837 |
| 12 | 3.906851  | -2.157644 | -0.838858 |
| 6  | -2.407578 | 0.699109  | -0.734214 |
| 6  | 3.982536  | -0.194384 | -0.055309 |
| 6  | -1.399709 | 1.599584  | -0.437676 |
| 6  | 1.644325  | -1.336230 | -0.021044 |
| 6  | -3.901672 | -1.418783 | -0.670935 |
| 6  | -1.457084 | -1.332858 | 1.124901  |
| 8  | -1.173230 | 4.070510  | -0.051329 |
| 6  | 3.428371  | 2.274693  | 0.730088  |
| 6  | -3.126640 | -0.345292 | -0.798864 |
| 6  | 3.480949  | 1.035262  | 0.268224  |
| 6  | -1.381322 | 2.926386  | -0.293397 |
| 6  | 2.541718  | -0.688171 | 0.143802  |
| 8  | -2.202574 | -1.614233 | 1.862472  |
| 12 | -0.007763 | 0.103092  | 0.231059  |

16

435.270844 Kcal/mol 18.875154 eV -100.690032 H MutI\_9\_65.log



|            |           |           |           |                                  |
|------------|-----------|-----------|-----------|----------------------------------|
| 6          | 2.062113  | -4.451433 | -0.085487 |                                  |
| 8          | -7.155656 | 1.600157  | -0.213927 |                                  |
| 12         | 5.214821  | 3.688818  | 0.124166  |                                  |
| 6          | 0.644581  | 0.609482  | -0.018698 |                                  |
| 6          | -3.477718 | 0.400004  | -0.003712 |                                  |
| 6          | 2.539544  | 0.008902  | -0.135555 |                                  |
| 6          | 3.075233  | 1.267647  | -0.237315 |                                  |
| 12         | 2.365653  | -2.033834 | -0.118097 |                                  |
| 6          | -4.735624 | 0.775525  | -0.234634 |                                  |
| 6          | 3.792866  | 2.293258  | -0.016720 |                                  |
| 6          | 1.014015  | -3.709277 | 0.149780  |                                  |
| 6          | -0.479475 | -1.574482 | 0.177289  |                                  |
| 6          | -0.785623 | -0.197917 | -0.013426 |                                  |
| 6          | 0.128123  | -2.658850 | 0.212267  |                                  |
| 6          | -2.178968 | 0.170200  | -0.026283 |                                  |
| 8          | -5.414356 | 1.217573  | 0.379193  |                                  |
| 16         |           |           |           |                                  |
| 435.871140 | Kcal/mol  | 18.901185 | eV        | -100.689075 H Child_12_61.log    |
| 8          | 4.168761  | 0.482411  | -0.367206 |                                  |
| 6          | -3.739713 | 0.342021  | -0.495335 |                                  |
| 6          | 3.639636  | -0.696959 | -0.216351 |                                  |
| 6          | -2.187707 | 3.995040  | -0.476718 |                                  |
| 6          | 3.050329  | -1.701593 | -0.063440 |                                  |
| 6          | -2.615130 | 2.829595  | -0.169676 |                                  |
| 12         | 3.260027  | 1.981919  | -0.224271 |                                  |
| 6          | -3.387438 | -0.899012 | -0.170346 |                                  |
| 6          | 1.978690  | -2.555152 | 0.141827  |                                  |
| 6          | -2.623995 | 1.471141  | 0.038898  |                                  |
| 6          | 1.239045  | 2.965445  | 0.951566  |                                  |
| 6          | -2.917845 | -2.109897 | -0.077178 |                                  |
| 6          | 0.921246  | -3.038089 | 0.360799  |                                  |
| 6          | -1.473794 | 0.612756  | 1.022848  |                                  |
| 12         | -1.511821 | -3.209293 | -0.138988 |                                  |
| 8          | -0.703562 | 0.447179  | 0.276924  |                                  |
| 16         |           |           |           |                                  |
| 438.444977 | Kcal/mol  | 19.012798 | eV        | -100.684974 H Child_11_19.log    |
| 6          | -4.242551 | 0.853978  | -0.403677 |                                  |
| 12         | 3.356710  | -1.617422 | -0.162177 |                                  |
| 6          | -3.278320 | 1.686618  | -0.303659 |                                  |
| 6          | 4.647413  | -0.278718 | 0.841389  |                                  |
| 6          | -2.227710 | 2.484138  | -0.191868 |                                  |
| 6          | 3.836684  | 0.608999  | 0.471205  |                                  |
| 12         | -3.919435 | -1.126429 | 0.397175  |                                  |
| 6          | 2.059112  | -0.135324 | -0.897584 |                                  |
| 6          | 2.594267  | 0.903711  | -0.144149 |                                  |
| 8          | 1.316537  | 1.660263  | 0.824220  |                                  |
| 6          | -2.313363 | -2.124076 | -0.501010 |                                  |
| 6          | 0.701391  | 0.295439  | -1.115727 |                                  |
| 6          | -0.263866 | -0.572209 | -1.082904 |                                  |
| 6          | 1.257021  | 1.830404  | -0.474904 |                                  |
| 6          | -1.230776 | -1.482193 | -0.774838 |                                  |
| 8          | -1.626926 | -0.597563 | 2.256577  |                                  |
| 16         |           |           |           |                                  |
| 439.729592 | Kcal/mol  | 19.068504 | eV        | -100.682926 H Original3D_9_3.log |

|            |                     |           |           |                              |
|------------|---------------------|-----------|-----------|------------------------------|
| 6          | 1.412985            | -0.571572 | 0.131017  |                              |
| 6          | 0.794248            | -1.824659 | 0.556645  |                              |
| 6          | 0.045461            | -0.024728 | -0.287708 |                              |
| 6          | -0.645015           | -1.263702 | 0.472136  |                              |
| 6          | -0.681237           | -0.747749 | -1.310242 |                              |
| 6          | -2.461855           | 1.178003  | 0.635109  |                              |
| 8          | -1.296010           | 1.837301  | 0.730023  |                              |
| 6          | -0.240827           | 1.427773  | -0.124458 |                              |
| 12         | -2.831181           | -1.207378 | 0.003334  |                              |
| 8          | 0.954251            | 2.244798  | 0.153028  |                              |
| 12         | 3.217897            | 0.416114  | 0.122024  |                              |
| 6          | -1.575205           | -1.539441 | -1.756438 |                              |
| 6          | 1.114103            | -3.075657 | 0.883196  |                              |
| 6          | 0.292367            | 2.482552  | -1.053440 |                              |
| 6          | -3.568002           | 0.599836  | 0.573365  |                              |
| 6          | 5.195223            | -0.500927 | -0.147300 |                              |
| 16         |                     |           |           |                              |
| 441.883137 | Kcal/mol            | 19.161891 | eV        | -100.679494 H Child_9_46.log |
| 8          | -5.097010           | -0.945494 | 0.417250  |                              |
| 6          | 3.927360            | 0.826893  | 0.864010  |                              |
| 6          | -3.926802           | -0.673401 | 0.449014  |                              |
| 12         | 2.002763            | 1.158554  | 1.751683  |                              |
| 12         | -1.987310           | 2.121366  | -1.301089 |                              |
| 6          | 3.656552            | -0.106709 | -0.011139 |                              |
| 6          | -2.650657           | -0.327191 | 0.578449  |                              |
| 6          | 3.183346            | -1.141434 | -0.744573 |                              |
| 6          | -1.284043           | -0.614795 | 0.255156  |                              |
| 6          | -0.035898           | -0.407734 | 1.626519  |                              |
| 6          | -1.552196           | 0.849313  | 0.450617  |                              |
| 6          | 2.305665            | -2.045091 | -0.864981 |                              |
| 6          | -0.360221           | -1.367624 | -0.294380 |                              |
| 6          | 1.332135            | -3.122792 | -1.196792 |                              |
| 6          | 0.760983            | -1.809907 | -0.828969 |                              |
| 8          | 1.056661            | 3.480967  | -1.305339 |                              |
| 16         |                     |           |           |                              |
| 443.107128 | Kcal/mol            | 19.214968 | eV        | -100.677544 H                |
|            | Original3D_14_6.log |           |           |                              |
| 6          | 0.860452            | 2.721610  | 0.193961  |                              |
| 6          | -0.320621           | 1.042342  | 0.256242  |                              |
| 8          | -0.480297           | 2.436610  | -0.118090 |                              |
| 6          | -1.821879           | -1.151137 | 0.657339  |                              |
| 6          | -1.785697           | -1.613959 | 1.834998  |                              |
| 6          | 1.204882            | 1.191642  | 0.717285  |                              |
| 12         | 2.635293            | 0.023293  | -0.904216 |                              |
| 6          | 1.740271            | 0.826657  | 1.867081  |                              |
| 6          | -2.781474           | -0.681665 | -0.366027 |                              |
| 6          | -0.591488           | 0.702586  | -1.876757 |                              |
| 6          | -2.138970           | -1.386228 | -1.497292 |                              |
| 8          | -3.445734           | 0.322373  | -0.171144 |                              |
| 6          | 2.956126            | -1.947852 | -0.017221 |                              |
| 6          | 3.910918            | -1.584854 | -0.865040 |                              |
| 6          | -1.242553           | -0.442698 | -1.870319 |                              |
| 12         | -0.012923           | -0.700838 | 1.579915  |                              |
| 16         |                     |           |           |                              |
| 443.390179 | Kcal/mol            | 19.227242 | eV        | -100.677093 H Child_3_44.log |

|            |           |           |           |                              |
|------------|-----------|-----------|-----------|------------------------------|
| 6          | -3.374277 | 3.276953  | -0.100821 |                              |
| 6          | 4.176309  | -0.728993 | -0.358529 |                              |
| 6          | -4.151070 | -2.198097 | -0.953769 |                              |
| 6          | 3.231736  | -1.463888 | 0.005511  |                              |
| 6          | -2.354235 | 2.508328  | 0.101864  |                              |
| 6          | 1.961659  | -1.668931 | 0.516821  |                              |
| 8          | -3.461918 | -1.668002 | -0.190893 |                              |
| 12         | 3.658761  | 1.294330  | -0.510410 |                              |
| 6          | -1.632662 | 1.223848  | 0.516048  |                              |
| 6          | 1.003554  | -1.386000 | 1.597093  |                              |
| 6          | -0.861762 | 2.279086  | 0.256887  |                              |
| 6          | 2.101166  | 2.365872  | 0.475467  |                              |
| 12         | -1.697855 | -0.830212 | 0.652837  |                              |
| 6          | 0.631990  | -1.708434 | 0.215361  |                              |
| 6          | -0.362836 | -1.076065 | -0.598971 |                              |
| 8          | 0.243379  | -0.095934 | -1.277467 |                              |
| 16         |           |           |           |                              |
| 443.551059 | Kcal/mol  | 19.234219 | eV        | -100.676836 H MutD_8_70.log  |
| 6          | -2.612623 | -0.317360 | 0.463422  |                              |
| 6          | 2.262547  | 3.073414  | -0.793866 |                              |
| 6          | 0.858494  | -2.125104 | -1.228113 |                              |
| 6          | 0.311895  | 1.772874  | 0.184193  |                              |
| 6          | -1.175695 | 0.021201  | 2.561789  |                              |
| 12         | -3.840884 | 1.055560  | -1.218889 |                              |
| 8          | -0.759419 | -1.085664 | 2.022820  |                              |
| 6          | -1.325817 | -0.040631 | 1.017257  |                              |
| 12         | 2.649138  | 0.697722  | -0.324135 |                              |
| 6          | 2.734074  | -1.403801 | 0.232074  |                              |
| 6          | -0.361466 | 0.772491  | 0.323596  |                              |
| 8          | -0.228124 | -2.611726 | -1.801017 |                              |
| 6          | 3.514265  | -0.838952 | 1.081547  |                              |
| 6          | -3.756517 | -0.538424 | 0.058654  |                              |
| 6          | 1.459075  | 2.572677  | -0.331627 |                              |
| 6          | 1.791984  | -1.525098 | -0.778616 |                              |
| 16         |           |           |           |                              |
| 445.030027 | Kcal/mol  | 19.298353 | eV        | -100.674480 H MutI_5_65.log  |
| 8          | 1.476060  | 2.089854  | 0.002700  |                              |
| 6          | 1.082055  | -3.157273 | 0.171690  |                              |
| 6          | 1.552390  | -1.959894 | 0.097159  |                              |
| 6          | -2.527298 | 1.422142  | 0.105083  |                              |
| 6          | 1.500793  | 0.877501  | -0.217013 |                              |
| 6          | 5.106180  | 1.212072  | 0.241833  |                              |
| 6          | -4.661697 | -0.307477 | 0.285089  |                              |
| 6          | -3.795800 | 0.618242  | 0.234409  |                              |
| 6          | 0.049203  | 1.002379  | -0.261818 |                              |
| 12         | -0.657333 | -1.702994 | -0.247292 |                              |
| 8          | 2.687912  | -1.179264 | 0.180639  |                              |
| 6          | -3.098326 | 2.652162  | 0.021317  |                              |
| 6          | 2.655951  | 0.400199  | -0.097286 |                              |
| 12         | -2.374311 | -1.184857 | -0.093053 |                              |
| 6          | -1.211239 | 0.816283  | -0.140583 |                              |
| 6          | 3.859113  | 0.985247  | -0.003642 |                              |
| 16         |           |           |           |                              |
| 445.298858 | Kcal/mol  | 19.310010 | eV        | -100.674051 H MutI_18_43.log |
| 6          | 0.596507  | -0.661788 | -0.267204 |                              |

|            |           |           |           |                               |
|------------|-----------|-----------|-----------|-------------------------------|
| 12         | 3.165993  | -2.299200 | -0.931301 |                               |
| 6          | 1.694885  | -1.209327 | -0.047484 |                               |
| 6          | -5.017894 | -1.578141 | 0.578724  |                               |
| 6          | -3.639437 | 1.270200  | 0.034037  |                               |
| 6          | -5.121343 | -0.317869 | 0.626522  |                               |
| 6          | -2.364943 | 1.218733  | -0.386686 |                               |
| 6          | -1.776370 | 0.009337  | -0.430461 |                               |
| 8          | 4.843137  | 1.189511  | 0.800945  |                               |
| 6          | -4.787174 | 0.983586  | 0.521048  |                               |
| 6          | 0.197802  | 6.103411  | -0.831263 |                               |
| 8          | -0.339055 | 0.074446  | -0.670172 |                               |
| 6          | 5.909500  | 1.563904  | 0.878435  |                               |
| 12         | 3.845522  | -0.845931 | 0.434625  |                               |
| 6          | -2.271604 | -1.258341 | -0.137430 |                               |
| 6          | -3.448402 | -1.518721 | 0.280750  |                               |
| 16         |           |           |           |                               |
| 449.034460 | Kcal/mol  | 19.472002 | eV        | -100.668098 H MutI_16_53.log  |
| 12         | 3.001095  | 0.155361  | -0.055975 |                               |
| 6          | 0.988656  | -0.418666 | -0.392823 |                               |
| 6          | -4.915486 | -0.991703 | 0.112850  |                               |
| 6          | -6.190381 | -0.848827 | 0.413477  |                               |
| 6          | -7.443144 | -0.717905 | 0.708849  |                               |
| 12         | -1.786427 | -1.168731 | -0.577981 |                               |
| 6          | 2.063580  | 2.108385  | 0.364656  |                               |
| 6          | -0.177266 | 0.072536  | -0.390328 |                               |
| 6          | -1.118682 | 1.241351  | -0.158078 |                               |
| 8          | 5.961718  | -1.232524 | 0.244995  |                               |
| 6          | 7.078101  | -1.771768 | 0.392807  |                               |
| 6          | -3.681270 | -1.159173 | -0.181700 |                               |
| 8          | 0.902032  | 2.320830  | -0.034003 |                               |
| 6          | -2.538709 | 1.296737  | -0.037002 |                               |
| 6          | 4.777205  | -0.730120 | 0.128173  |                               |
| 6          | -0.423606 | 2.494818  | 0.025710  |                               |
| 16         |           |           |           |                               |
| 451.323249 | Kcal/mol  | 19.571253 | eV        | -100.664451 H Child_11_20.log |
| 12         | -6.066582 | -1.983721 | -0.238209 |                               |
| 8          | 2.804445  | -1.058511 | 2.045178  |                               |
| 6          | -4.679537 | -0.592839 | 0.286270  |                               |
| 6          | 2.667346  | -1.263211 | 0.969610  |                               |
| 6          | -3.696607 | 0.262977  | 0.265787  |                               |
| 6          | 2.865041  | -1.890201 | -0.255630 |                               |
| 8          | -2.367077 | 2.115201  | 0.258273  |                               |
| 6          | 3.668461  | -1.012015 | -1.042045 |                               |
| 6          | -1.222388 | 2.719575  | -0.012397 |                               |
| 6          | 2.316528  | -3.105925 | -0.481897 |                               |
| 6          | -0.154565 | 3.220937  | -0.258421 |                               |
| 6          | 3.620666  | 0.256282  | -0.443840 |                               |
| 6          | -2.463209 | 0.804313  | -0.077773 |                               |
| 6          | 1.549527  | -4.124743 | -0.676314 |                               |
| 12         | 1.856233  | 2.912359  | -0.336286 |                               |
| 6          | 3.366277  | 1.458652  | -0.195629 |                               |
| 16         |           |           |           |                               |
| 451.673725 | Kcal/mol  | 19.586451 | eV        | -100.663892 H MutI_3_77.log   |
| 12         | -4.105879 | -0.326061 | -0.012491 |                               |
| 6          | 1.504212  | 1.008479  | 1.147422  |                               |

|                                                               |           |           |            |
|---------------------------------------------------------------|-----------|-----------|------------|
| 12                                                            | 1.805007  | -2.041170 | -0.014375  |
| 6                                                             | 1.303244  | 1.097257  | -1.077264  |
| 6                                                             | -0.770720 | -0.290567 | -0.030497  |
| 6                                                             | 0.680170  | 1.930598  | 0.176929   |
| 6                                                             | -1.532861 | 1.044601  | 0.060870   |
| 8                                                             | -2.834925 | 1.078133  | 0.069276   |
| 6                                                             | -1.391249 | -1.497461 | -0.044844  |
| 6                                                             | 0.662578  | -0.238579 | -0.129056  |
| 6                                                             | 3.063423  | 0.625107  | 0.504875   |
| 6                                                             | -0.609249 | 2.012425  | 0.157245   |
| 6                                                             | 3.813179  | -1.711162 | 0.027176   |
| 8                                                             | 2.667751  | 1.010276  | -0.828432  |
| 6                                                             | -5.528428 | -1.481991 | -0.028671  |
| 6                                                             | 3.630343  | -0.548790 | 0.301756   |
| 16                                                            |           |           |            |
| 452.847430 Kcal/mol 19.637348 eV -100.662022 H MutI_15_35.log |           |           |            |
| 6                                                             | -1.658677 | 2.896362  | -0.134457  |
| 6                                                             | -0.507191 | 1.460183  | -0.190996  |
| 6                                                             | -0.378041 | 3.252624  | -0.261306  |
| 6                                                             | 0.703242  | 2.174285  | -0.322373  |
| 6                                                             | 3.848684  | -0.736241 | 0.522300   |
| 6                                                             | -3.867286 | -0.582756 | 0.277705   |
| 12                                                            | 1.468280  | -2.522630 | 0.115145   |
| 6                                                             | -1.327763 | -1.138351 | -0.521396  |
| 8                                                             | -0.051024 | -1.764035 | -0.594034  |
| 6                                                             | -3.857995 | -1.928430 | -0.088565  |
| 6                                                             | -3.372197 | 0.556862  | 0.534140   |
| 6                                                             | 2.089163  | 2.147109  | -0.338979  |
| 12                                                            | 3.438756  | 1.034422  | -0.037985  |
| 6                                                             | -2.797773 | 1.749393  | 0.982788   |
| 8                                                             | 2.994095  | -1.669573 | 0.461099   |
| 6                                                             | -2.612334 | -2.296479 | -0.435934  |
| 16                                                            |           |           |            |
| 453.461039 Kcal/mol 19.663957 eV -100.661044 H                |           |           |            |
| OriginalD_0_0.log                                             |           |           |            |
| 6                                                             | 0.000000  | 0.000000  | 5.818438   |
| 8                                                             | 0.000000  | 0.000000  | 7.054462   |
| 6                                                             | 0.000000  | 0.000000  | 8.369403   |
| 12                                                            | 0.000000  | 0.000000  | 10.155663  |
| 6                                                             | 0.000000  | 0.000000  | 4.617108   |
| 6                                                             | 0.000000  | 0.000000  | 3.296101   |
| 6                                                             | 0.000000  | 0.000000  | 2.011444   |
| 12                                                            | 0.000000  | 0.000000  | 0.169760   |
| 6                                                             | 0.000000  | 0.000000  | -2.151385  |
| 8                                                             | 0.000000  | 0.000000  | -3.422363  |
| 6                                                             | 0.000000  | 0.000000  | -4.703303  |
| 6                                                             | 0.000000  | 0.000000  | -5.941790  |
| 6                                                             | 0.000000  | 0.000000  | -7.278583  |
| 6                                                             | 0.000000  | 0.000000  | -8.532182  |
| 6                                                             | 0.000000  | 0.000000  | -9.857561  |
| 6                                                             | 0.000000  | 0.000000  | -11.141335 |
| 16                                                            |           |           |            |
| 457.859082 Kcal/mol 19.854674 eV -100.654035 H Child_6_53.log |           |           |            |
| 8                                                             | -4.288447 | 0.963263  | -0.040532  |
| 8                                                             | 5.350275  | 1.482265  | 0.789519   |

|            |                     |           |           |                               |
|------------|---------------------|-----------|-----------|-------------------------------|
| 12         | -2.821027           | 2.582840  | -0.006287 |                               |
| 12         | 4.591405            | -1.458312 | -0.303141 |                               |
| 6          | -3.873181           | -0.282665 | 0.057667  |                               |
| 6          | 4.384398            | 0.920255  | 0.352135  |                               |
| 6          | 3.130548            | 0.768465  | -0.068877 |                               |
| 6          | -3.273686           | -1.393264 | 0.044468  |                               |
| 6          | 1.946045            | 0.491026  | -0.503663 |                               |
| 6          | -1.298637           | 3.760885  | -0.425873 |                               |
| 6          | -2.285329           | -2.477788 | 0.112078  |                               |
| 6          | 0.065456            | -2.906851 | -1.297958 |                               |
| 6          | -0.074368           | 4.470878  | -0.097968 |                               |
| 6          | -0.943681           | -2.758439 | -0.230673 |                               |
| 6          | -0.291947           | -3.681372 | 0.264250  |                               |
| 6          | -2.442148           | -2.420890 | 1.414620  |                               |
| 16         |                     |           |           |                               |
| 457.905849 | Kcal/mol            | 19.856702 | eV        | -100.653961 H Child_17_22.log |
| 8          | 4.804912            | -2.449154 | 0.524516  |                               |
| 6          | -0.168071           | 4.208343  | -0.235410 |                               |
| 6          | 3.866455            | -1.729219 | 0.106041  |                               |
| 6          | 0.384882            | 2.998107  | 0.032772  |                               |
| 6          | -2.991347           | -1.179344 | 0.166754  |                               |
| 6          | -3.702442           | 1.167520  | -0.148922 |                               |
| 6          | 2.527778            | -2.006539 | -0.419182 |                               |
| 8          | 2.743331            | 1.930812  | 0.471674  |                               |
| 12         | -0.134808           | -0.093963 | -0.803880 |                               |
| 6          | 0.823289            | 1.806406  | -0.035401 |                               |
| 6          | 1.411949            | -1.649634 | -0.867895 |                               |
| 6          | -6.407381           | -2.510779 | 0.093838  |                               |
| 6          | 3.400746            | 0.829882  | 0.402688  |                               |
| 6          | -2.496983           | 0.025471  | -0.192276 |                               |
| 6          | 3.863873            | -0.317942 | 0.259813  |                               |
| 12         | -5.153728           | -0.381611 | 0.558343  |                               |
| 16         |                     |           |           |                               |
| 458.371130 | Kcal/mol            | 19.876879 | eV        | -100.653219 H                 |
|            | Original3D_10_7.log |           |           |                               |
| 6          | 2.346535            | -1.984197 | -0.545135 |                               |
| 12         | 1.842271            | 0.316366  | 1.137933  |                               |
| 6          | -1.238177           | -0.743069 | -0.741510 |                               |
| 6          | -0.123134           | -1.312120 | -0.679179 |                               |
| 8          | 2.430316            | 1.830331  | -0.523316 |                               |
| 6          | -2.444574           | -0.999172 | -1.180150 |                               |
| 6          | 3.517183            | -1.599660 | -0.126459 |                               |
| 6          | 4.203186            | -0.512428 | 0.481110  |                               |
| 12         | -1.826020           | 0.630281  | 1.658886  |                               |
| 8          | -3.476899           | -1.359305 | -1.460258 |                               |
| 6          | -1.920443           | -1.740508 | 2.317248  |                               |
| 6          | -3.510302           | 1.370525  | 0.388060  |                               |
| 6          | -2.055482           | 1.809851  | -0.605701 |                               |
| 6          | 2.396768            | 2.858735  | -1.108590 |                               |
| 6          | -0.891163           | 2.130872  | -0.544439 |                               |
| 6          | 1.082543            | -1.800156 | -0.604130 |                               |
| 16         |                     |           |           |                               |
| 462.830674 | Kcal/mol            | 20.070263 | eV        | -100.646112 H                 |
|            | Original2D_18_1.log |           |           |                               |
| 12         | 2.516070            | 0.602283  | -0.000000 |                               |

|            |           |           |           |                     |
|------------|-----------|-----------|-----------|---------------------|
| 12         | 0.791632  | 3.926335  | -0.000000 |                     |
| 6          | -0.478230 | -0.657033 | 0.000000  |                     |
| 6          | 0.511569  | 1.728040  | -0.000000 |                     |
| 6          | -1.537071 | -1.420715 | 0.000000  |                     |
| 6          | 0.000000  | 0.651527  | -0.000000 |                     |
| 6          | 0.622526  | -2.339184 | -0.000000 |                     |
| 6          | 1.501062  | -1.496777 | -0.000000 |                     |
| 6          | 3.011061  | 2.634619  | -0.000000 |                     |
| 8          | 1.714699  | 5.477523  | -0.000000 |                     |
| 6          | 0.105695  | -3.723464 | 0.000000  |                     |
| 6          | -1.666153 | -2.749578 | 0.000000  |                     |
| 8          | -3.478684 | 0.201657  | 0.000000  |                     |
| 6          | -1.492939 | -4.044886 | 0.000000  |                     |
| 6          | -0.251615 | -5.046270 | 0.000000  |                     |
| 6          | -4.589330 | -0.165755 | 0.000000  |                     |
| 16         |           |           |           |                     |
| 462.884681 | Kcal/mol  | 20.072605 | eV        | -100.646026 H       |
|            |           |           |           | Child_12_15.log     |
| 6          | 0.593296  | 3.082693  | 1.498317  |                     |
| 8          | -3.019827 | -1.647693 | 0.012802  |                     |
| 6          | -0.017741 | 2.383633  | 0.515234  |                     |
| 6          | -0.673456 | -2.252948 | -0.167539 |                     |
| 6          | 1.183206  | 2.606741  | -0.315024 |                     |
| 6          | -1.747416 | -1.901538 | 0.090197  |                     |
| 6          | 2.214798  | 2.655469  | -1.046608 |                     |
| 8          | 0.583135  | -2.285623 | -0.161148 |                     |
| 6          | -6.254693 | -0.183046 | 0.024769  |                     |
| 6          | -1.182057 | 1.467453  | 0.269572  |                     |
| 6          | -4.928465 | -0.315592 | 0.043386  |                     |
| 6          | 10.652659 | -2.255752 | 0.794301  |                     |
| 6          | -3.614762 | -0.476830 | 0.066451  |                     |
| 12         | 2.984555  | 0.766018  | -0.919640 |                     |
| 12         | 1.612300  | -0.801617 | 0.074180  |                     |
| 6          | -2.170156 | 0.505336  | 0.115658  |                     |
| 16         |           |           |           |                     |
| 463.368463 | Kcal/mol  | 20.093584 | eV        | -100.645255 H       |
|            |           |           |           | Original2D_11_1.log |
| 6          | -2.319562 | 0.393987  | -0.000000 |                     |
| 6          | -0.945920 | 0.327338  | -0.000000 |                     |
| 6          | 0.090975  | 1.298357  | 0.000000  |                     |
| 12         | -3.929032 | 1.415345  | -0.000000 |                     |
| 6          | 1.351677  | 0.642195  | 0.000000  |                     |
| 6          | -3.174375 | -0.259830 | -0.000000 |                     |
| 6          | 2.218269  | -0.344984 | 0.000000  |                     |
| 12         | -2.115467 | -2.220364 | -0.000000 |                     |
| 6          | -0.000000 | -0.874091 | -0.000000 |                     |
| 8          | 3.684259  | 0.338730  | 0.000000  |                     |
| 6          | 1.755477  | -1.618473 | 0.000000  |                     |
| 6          | 3.565352  | 1.643168  | 0.000000  |                     |
| 6          | -0.114276 | -2.331828 | -0.000000 |                     |
| 6          | 1.272619  | -2.866822 | -0.000000 |                     |
| 8          | 2.161981  | 1.889232  | 0.000000  |                     |
| 6          | 0.593778  | 2.630404  | 0.000000  |                     |
| 16         |           |           |           |                     |
| 463.436593 | Kcal/mol  | 20.096538 | eV        | -100.645147 H       |
|            |           |           |           | Child_3_31.log      |
| 6          | -0.660624 | 2.941235  | -0.002220 |                     |

|                                                               |           |           |            |
|---------------------------------------------------------------|-----------|-----------|------------|
| 6                                                             | -4.236068 | -1.623600 | 0.000646   |
| 6                                                             | 0.404192  | 2.216205  | -0.002785  |
| 6                                                             | -2.992583 | -1.839788 | 0.000552   |
| 6                                                             | 2.743246  | 1.105072  | 0.012345   |
| 6                                                             | -1.655310 | -1.902382 | 0.000411   |
| 6                                                             | 4.098665  | 0.324796  | 0.009171   |
| 12                                                            | 1.726295  | -2.085783 | -0.000650  |
| 8                                                             | 5.295546  | 0.116974  | -0.008608  |
| 6                                                             | -0.681885 | -1.050574 | 0.001302   |
| 6                                                             | 1.378729  | 1.192671  | 0.002401   |
| 12                                                            | -4.643506 | 0.369979  | 0.001438   |
| 6                                                             | -0.618922 | 0.481430  | -0.001025  |
| 6                                                             | -3.671832 | 2.370558  | -0.002359  |
| 6                                                             | 0.630240  | -0.187885 | -0.009919  |
| 8                                                             | 3.026885  | -0.564071 | 0.001035   |
| 16                                                            |           |           |            |
| 464.228823 Kcal/mol 20.130892 eV -100.643884 H MutI_18_49.log |           |           |            |
| 6                                                             | -2.085722 | -2.651820 | 0.148314   |
| 6                                                             | 6.563302  | -0.645579 | -0.477587  |
| 6                                                             | 0.385950  | -0.988109 | 0.339738   |
| 12                                                            | 2.161044  | -0.471556 | 0.122709   |
| 8                                                             | -1.002962 | -2.342138 | 0.061778   |
| 6                                                             | -0.191719 | 0.076377  | -0.187528  |
| 6                                                             | -3.825176 | 1.234981  | -0.181360  |
| 6                                                             | 5.276204  | -0.593182 | -0.207439  |
| 6                                                             | -1.860223 | 2.914662  | -0.161904  |
| 6                                                             | -2.921022 | 2.212944  | -0.183234  |
| 6                                                             | -4.392328 | 0.091554  | -0.134853  |
| 12                                                            | -3.770821 | -1.660260 | -0.010674  |
| 8                                                             | -0.232546 | 1.628546  | -0.026893  |
| 6                                                             | 2.536484  | 2.427714  | 0.559627   |
| 6                                                             | 3.956328  | -0.648577 | -0.005720  |
| 6                                                             | 1.424821  | 1.784125  | 0.221363   |
| 16                                                            |           |           |            |
| 465.220410 Kcal/mol 20.173892 eV -100.642304 H                |           |           |            |
| OriginalID_17_0.log                                           |           |           |            |
| 6                                                             | 0.000000  | 0.000000  | 3.715608   |
| 12                                                            | 0.000000  | 0.000000  | 1.961962   |
| 6                                                             | 0.000000  | 0.000000  | 4.909252   |
| 6                                                             | 0.000000  | 0.000000  | 6.175311   |
| 6                                                             | 0.000000  | 0.000000  | 7.432491   |
| 6                                                             | 0.000000  | 0.000000  | 8.625937   |
| 12                                                            | 0.000000  | 0.000000  | 10.358594  |
| 6                                                             | 0.000000  | 0.000000  | -0.507009  |
| 8                                                             | 0.000000  | 0.000000  | -1.780530  |
| 6                                                             | 0.000000  | 0.000000  | -3.092070  |
| 6                                                             | 0.000000  | 0.000000  | -4.346821  |
| 6                                                             | 0.000000  | 0.000000  | -5.717446  |
| 6                                                             | 0.000000  | 0.000000  | -7.012170  |
| 6                                                             | 0.000000  | 0.000000  | -8.362897  |
| 6                                                             | 0.000000  | 0.000000  | -9.658182  |
| 8                                                             | 0.000000  | 0.000000  | -10.821805 |
| 16                                                            |           |           |            |
| 467.410969 Kcal/mol 20.268884 eV -100.638813 H MutI_18_47.log |           |           |            |
| 6                                                             | -3.099958 | -2.238695 | 0.298085   |



|                                                |           |           |           |                 |
|------------------------------------------------|-----------|-----------|-----------|-----------------|
| 6                                              | -1.601312 | 2.215962  | -0.248706 |                 |
| 8                                              | 3.881614  | -0.743836 | -0.258934 |                 |
| 6                                              | 1.149003  | 4.166631  | 0.653985  |                 |
| 12                                             | -4.590254 | -1.186020 | -0.489247 |                 |
| 6                                              | 0.104449  | -0.678216 | 0.573171  |                 |
| 6                                              | 5.145946  | -1.099261 | -0.460065 |                 |
| 6                                              | 1.494970  | -0.169894 | 0.172144  |                 |
| 6                                              | 2.709172  | -0.405299 | -0.120041 |                 |
| 8                                              | -2.407859 | 1.164823  | -0.501666 |                 |
| 6                                              | 0.268071  | 0.622534  | 0.289214  |                 |
| 6                                              | -3.338885 | 0.478506  | -0.913311 |                 |
| 12                                             | -1.132383 | -2.331853 | 0.922049  |                 |
| 6                                              | -0.261315 | 1.984879  | 0.135274  |                 |
| 6                                              | 6.372446  | -1.471980 | -0.598354 |                 |
| 6                                              | 0.537680  | 3.069263  | 0.367132  |                 |
| 16                                             |           |           |           |                 |
| 467.792983 Kcal/mol 20.285449 eV -100.638204 H |           |           |           | Child_3_29.log  |
| 6                                              | -2.027269 | 2.807134  | 0.791834  |                 |
| 6                                              | 5.368291  | 2.775106  | -0.017187 |                 |
| 6                                              | -2.402594 | 1.446141  | 0.671410  |                 |
| 6                                              | 4.716433  | 0.253531  | 0.011803  |                 |
| 6                                              | -3.196101 | -2.653850 | -0.189166 |                 |
| 6                                              | 5.016577  | 1.492687  | -0.030897 |                 |
| 6                                              | -2.054386 | 3.836041  | -0.042388 |                 |
| 12                                             | 3.827083  | -1.587794 | -0.109151 |                 |
| 6                                              | -3.718057 | -1.766710 | -0.898443 |                 |
| 6                                              | 2.098850  | -2.606374 | 0.062531  |                 |
| 6                                              | -2.871867 | 1.291004  | -0.566159 |                 |
| 6                                              | 0.998100  | -1.930678 | -0.016860 |                 |
| 12                                             | -2.263349 | -0.865447 | 0.773670  |                 |
| 6                                              | -0.143706 | -1.277191 | -0.040569 |                 |
| 8                                              | -1.854373 | 4.850813  | -0.632985 |                 |
| 8                                              | -1.829431 | -3.921084 | -0.165724 |                 |
| 16                                             |           |           |           |                 |
| 467.895791 Kcal/mol 20.289907 eV -100.638041 H |           |           |           | MutD_13_70.log  |
| 6                                              | 7.907664  | -0.749231 | 1.565460  |                 |
| 8                                              | 6.404077  | 0.101054  | 0.073450  |                 |
| 8                                              | -2.522069 | 3.510469  | 0.742662  |                 |
| 6                                              | -2.980269 | -3.517193 | 0.769727  |                 |
| 6                                              | 1.679639  | 0.058729  | -0.908897 |                 |
| 6                                              | 2.939793  | 0.470475  | -0.761971 |                 |
| 12                                             | -2.635160 | 1.066617  | -0.343904 |                 |
| 6                                              | 5.542573  | 0.236853  | -0.069472 |                 |
| 6                                              | 0.354393  | 0.052281  | -0.808193 |                 |
| 6                                              | -3.242385 | 4.403864  | 0.539201  |                 |
| 6                                              | -4.219294 | -1.285151 | 0.308190  |                 |
| 12                                             | -1.619591 | -2.096424 | -0.247885 |                 |
| 6                                              | -4.297511 | -0.061618 | 0.025303  |                 |
| 6                                              | 4.266974  | 0.323316  | -0.446564 |                 |
| 6                                              | -3.689251 | -2.578443 | 0.521066  |                 |
| 6                                              | -0.928834 | -0.109632 | -0.638419 |                 |
| 16                                             |           |           |           |                 |
| 470.642738 Kcal/mol 20.409026 eV -100.633663 H |           |           |           | Child_10_41.log |
| 6                                              | -0.388876 | -3.397600 | -0.009354 |                 |
| 8                                              | 3.224136  | 4.485908  | -0.504085 |                 |

|            |           |           |           |                               |
|------------|-----------|-----------|-----------|-------------------------------|
| 6          | 0.866791  | -3.319064 | -0.105032 |                               |
| 6          | 3.718393  | 3.411634  | -0.238258 |                               |
| 12         | -2.291717 | -2.714903 | 0.074869  |                               |
| 6          | 4.232686  | 2.268891  | 0.053180  |                               |
| 6          | -4.167182 | -1.965455 | -0.162037 |                               |
| 8          | -4.974661 | 3.639508  | 0.700869  |                               |
| 6          | 2.164314  | -3.166795 | -0.049083 |                               |
| 12         | 4.601018  | 0.366714  | 0.314782  |                               |
| 6          | 3.260021  | -2.453041 | -0.007599 |                               |
| 6          | -4.591969 | 2.647206  | 0.244722  |                               |
| 6          | -3.882726 | -0.723804 | -0.315567 |                               |
| 6          | -4.121338 | 1.558124  | -0.206375 |                               |
| 6          | 4.191855  | -1.653166 | 0.339748  |                               |
| 6          | -3.566537 | 0.655560  | -0.586026 |                               |
| 16         |           |           |           |                               |
| 476.016328 | Kcal/mol  | 20.642048 | eV        | -100.625100 H Child_15_26.log |
| 12         | 7.617425  | 1.340549  | 0.001602  |                               |
| 6          | -3.960273 | 3.504130  | 0.451242  |                               |
| 6          | 5.791087  | 0.591380  | 0.048207  |                               |
| 8          | -3.701149 | 4.448530  | 1.199020  |                               |
| 6          | 4.593695  | 0.094430  | 0.022893  |                               |
| 6          | -4.072674 | 2.429902  | -0.249987 |                               |
| 6          | 3.405458  | -0.390515 | 0.029340  |                               |
| 6          | -4.093012 | -1.144497 | -1.318863 |                               |
| 8          | 2.272149  | -0.849425 | 0.046851  |                               |
| 12         | -3.239948 | 0.767014  | -1.029312 |                               |
| 6          | 1.135391  | -1.319607 | 0.054101  |                               |
| 6          | -3.092574 | -1.915369 | -1.157202 |                               |
| 6          | 0.021707  | -1.829915 | 0.039219  |                               |
| 6          | -3.387880 | -3.723428 | 3.419001  |                               |
| 6          | -1.149396 | -2.473276 | -0.018716 |                               |
| 6          | -2.041150 | -2.837168 | -0.924977 |                               |
| 16         |           |           |           |                               |
| 479.332442 | Kcal/mol  | 20.785848 | eV        | -100.619815 H Child_13_17.log |
| 8          | -4.046321 | 1.306537  | -0.425736 |                               |
| 6          | 3.074799  | -3.016023 | -0.589899 |                               |
| 6          | -4.396206 | 0.084976  | -0.401032 |                               |
| 6          | 3.266098  | -1.785996 | -0.297471 |                               |
| 6          | -4.203549 | -1.148652 | -0.276991 |                               |
| 6          | 3.839451  | 0.878011  | -0.662478 |                               |
| 12         | -2.052007 | 1.021399  | 0.027550  |                               |
| 6          | 3.004250  | -0.453645 | -0.084416 |                               |
| 6          | -2.875362 | -1.465218 | -0.023447 |                               |
| 6          | 3.253712  | 2.021673  | -0.317849 |                               |
| 6          | -0.201628 | 1.610448  | 0.833954  |                               |
| 6          | 1.745790  | 0.154837  | 0.951792  |                               |
| 6          | -1.638144 | -1.315032 | 0.182107  |                               |
| 6          | 2.549438  | 3.110506  | -0.199905 |                               |
| 8          | 0.926397  | 0.154427  | 0.240741  |                               |
| 12         | 0.422632  | -1.333318 | 0.538597  |                               |
| 16         |           |           |           |                               |
| 482.215812 | Kcal/mol  | 20.910883 | eV        | -100.615220 H Child_7_61.log  |
| 6          | 0.814801  | 1.179705  | 2.205344  |                               |
| 6          | -3.901252 | -0.018332 | -0.192711 |                               |
| 12         | 4.211891  | -1.132217 | -0.311277 |                               |

|                                                |           |           |           |                 |
|------------------------------------------------|-----------|-----------|-----------|-----------------|
| 6                                              | -3.722935 | -1.372731 | -0.267131 |                 |
| 6                                              | 1.112582  | 0.814484  | 0.913664  |                 |
| 6                                              | -3.419754 | 1.154141  | -0.123303 |                 |
| 6                                              | 0.454519  | -0.219349 | 1.565513  |                 |
| 6                                              | -3.245612 | -2.553593 | -0.294063 |                 |
| 6                                              | 1.738820  | -1.830348 | 0.589044  |                 |
| 6                                              | -2.407564 | 2.132928  | -0.154370 |                 |
| 6                                              | 3.331866  | 0.538914  | -0.722166 |                 |
| 6                                              | -1.163751 | 2.625166  | -0.296572 |                 |
| 6                                              | 1.799978  | 0.862995  | -0.183251 |                 |
| 12                                             | -1.138674 | -2.427734 | 0.018870  |                 |
| 8                                              | 0.247929  | 2.966542  | -0.520467 |                 |
| 8                                              | 1.598472  | -0.112101 | -1.320922 |                 |
| 16                                             |           |           |           |                 |
| 482.228276 Kcal/mol 20.911424 eV -100.615200 H |           |           |           | MutI_18_79.log  |
| 12                                             | -3.492810 | -1.661000 | -0.059159 |                 |
| 8                                              | 2.569571  | 0.740357  | 0.504837  |                 |
| 6                                              | -1.639818 | -2.402432 | -0.282985 |                 |
| 6                                              | 3.385590  | 3.075485  | -0.149612 |                 |
| 6                                              | -3.317966 | 0.823347  | 0.007259  |                 |
| 6                                              | 2.971459  | 1.815311  | 0.190829  |                 |
| 6                                              | -2.644987 | 3.485260  | 0.212641  |                 |
| 6                                              | 2.326494  | -1.999245 | -0.069543 |                 |
| 12                                             | 3.834039  | -3.238758 | -0.073624 |                 |
| 8                                              | -1.129726 | -1.145932 | -0.318380 |                 |
| 6                                              | 0.471537  | -0.484191 | 0.617376  |                 |
| 6                                              | -4.297238 | 0.006844  | 0.343033  |                 |
| 6                                              | 1.126642  | -1.607274 | 0.153319  |                 |
| 6                                              | -1.962132 | 1.140471  | -0.588802 |                 |
| 6                                              | -2.877888 | 2.209994  | 0.055383  |                 |
| 6                                              | 3.856054  | 4.276712  | -0.471941 |                 |
| 16                                             |           |           |           |                 |
| 485.691003 Kcal/mol 21.061582 eV -100.609682 H |           |           |           | Child_10_59.log |
| 8                                              | -5.349096 | -0.559328 | -0.129789 |                 |
| 6                                              | 7.557543  | -0.770549 | 0.090450  |                 |
| 6                                              | -4.310491 | -1.202059 | -0.056362 |                 |
| 6                                              | 6.280985  | -0.473051 | -0.090215 |                 |
| 6                                              | -3.207429 | -1.709013 | 0.010425  |                 |
| 6                                              | 5.065485  | -0.186758 | -0.213782 |                 |
| 8                                              | -3.285653 | 1.870390  | 0.156495  |                 |
| 6                                              | 3.783980  | 0.124365  | -0.304719 |                 |
| 6                                              | -1.907564 | -2.668919 | 0.138155  |                 |
| 6                                              | 2.576763  | 0.374090  | -0.213260 |                 |
| 6                                              | -1.664761 | 1.374410  | 0.460857  |                 |
| 6                                              | 1.003924  | 0.726373  | 0.154642  |                 |
| 6                                              | -0.670620 | -2.794715 | 0.060641  |                 |
| 6                                              | 0.929733  | 0.879142  | 1.604590  |                 |
| 12                                             | -0.959492 | 2.487730  | -0.443608 |                 |
| 12                                             | -1.002783 | -0.198429 | -0.394906 |                 |
| 16                                             |           |           |           |                 |
| 488.456634 Kcal/mol 21.181511 eV -100.605275 H |           |           |           | Child_4_21.log  |
| 6                                              | 4.137369  | -0.426248 | -0.860109 |                 |
| 6                                              | -4.490727 | -0.132511 | -0.062826 |                 |
| 8                                              | 3.643736  | -1.464781 | 0.026961  |                 |
| 6                                              | -3.886069 | -1.238060 | -0.091290 |                 |

|            |            |           |           |                              |
|------------|------------|-----------|-----------|------------------------------|
| 12         | 2.719312   | 1.224558  | -0.496194 |                              |
| 6          | -2.414423  | -2.126667 | -0.464885 |                              |
| 6          | 3.385546   | -2.408945 | 0.735279  |                              |
| 12         | -2.315078  | 0.621116  | 0.240623  |                              |
| 6          | 0.917781   | 0.884271  | 0.585341  |                              |
| 6          | -1.535950  | 2.809420  | -0.136758 |                              |
| 8          | -1.445248  | -1.057536 | -0.617717 |                              |
| 6          | 0.735151   | -0.512022 | 1.323566  |                              |
| 6          | -0.249102  | 2.804422  | -0.158451 |                              |
| 6          | -1.083287  | -2.759022 | -0.478922 |                              |
| 6          | -0.273944  | 0.436850  | 1.084761  |                              |
| 6          | 1.017871   | 2.340252  | -0.176889 |                              |
| 16         |            |           |           |                              |
| 489.893438 | Kcal/mol   | 21.243817 | eV        | -100.602985 H Child_3_32.log |
| 6          | 5.341094   | -0.918867 | 0.121793  |                              |
| 6          | -2.575957  | -3.043314 | -0.569648 |                              |
| 6          | 2.504437   | 2.957258  | -0.231458 |                              |
| 6          | -2.869810  | -1.851529 | -0.292046 |                              |
| 6          | 4.545798   | -2.237259 | 0.247791  |                              |
| 6          | -3.455783  | 0.580414  | 0.288626  |                              |
| 6          | 1.281021   | 3.336256  | -0.253626 |                              |
| 6          | -2.619060  | -0.478888 | 0.048968  |                              |
| 12         | 2.028687   | 0.858807  | -0.019879 |                              |
| 8          | -4.039673  | 1.557621  | 0.534765  |                              |
| 6          | -0.075743  | 3.534778  | -0.257631 |                              |
| 12         | -0.582094  | -2.310981 | -0.228722 |                              |
| 8          | 0.840656   | -1.138093 | 0.170687  |                              |
| 6          | -1.328011  | 0.003293  | 0.227808  |                              |
| 6          | -0.889211  | 2.472955  | -0.163247 |                              |
| 6          | 1.513395   | -2.010118 | 0.389270  |                              |
| 16         |            |           |           |                              |
| 490.092566 | Kcal/mol   | 21.252452 | eV        | -100.602668 H MutD_1_66.log  |
| 8          | -3.253275  | 0.490279  | -0.026476 |                              |
| 6          | 4.435567   | 0.288475  | -0.189356 |                              |
| 6          | 3.105263   | 0.485087  | -0.201637 |                              |
| 12         | 9.756703   | -1.205034 | 0.096922  |                              |
| 6          | 8.081890   | 0.454254  | 0.236401  |                              |
| 6          | -8.175958  | -0.491507 | -0.005500 |                              |
| 6          | -4.447318  | 0.277720  | 0.415164  |                              |
| 8          | 6.946699   | -0.365528 | -0.129457 |                              |
| 6          | 5.665982   | 0.018982  | -0.060565 |                              |
| 6          | -5.653340  | 0.019663  | 0.163496  |                              |
| 12         | -0.095888  | 0.932007  | -0.192090 |                              |
| 6          | -6.945803  | -0.236693 | 0.093772  |                              |
| 6          | -10.711265 | -1.029818 | -0.226643 |                              |
| 6          | 1.901127   | 0.720780  | -0.123890 |                              |
| 6          | -2.043585  | 0.636542  | 0.411177  |                              |
| 6          | -9.458754  | -0.763766 | -0.114173 |                              |
| 16         |            |           |           |                              |
| 493.730452 | Kcal/mol   | 21.410206 | eV        | -100.596870 H Child_1_11.log |
| 6          | 1.997496   | -2.337722 | 0.351539  |                              |
| 6          | -1.568314  | 3.612968  | -0.692451 |                              |
| 6          | 0.734056   | -2.824815 | 0.547211  |                              |
| 6          | -0.427654  | 3.106800  | 0.041276  |                              |
| 6          | 3.010958   | -1.570222 | 0.226111  |                              |

|            |           |           |           |                               |
|------------|-----------|-----------|-----------|-------------------------------|
| 6          | -4.622534 | 0.111741  | 1.513954  |                               |
| 6          | -0.249816 | -2.170726 | -0.139795 |                               |
| 6          | -3.724605 | 0.513965  | 0.712587  |                               |
| 12         | 0.976504  | -0.591845 | -1.000635 |                               |
| 6          | 4.185892  | 3.067187  | 0.822884  |                               |
| 6          | -1.563950 | -2.081553 | -0.232502 |                               |
| 8          | -0.261696 | 1.668551  | -0.291219 |                               |
| 12         | 4.066322  | 0.277838  | 0.273693  |                               |
| 6          | -2.508900 | 0.551758  | 0.069274  |                               |
| 8          | -2.660842 | -1.758382 | -0.469372 |                               |
| 6          | -1.451564 | 0.768408  | -0.752083 |                               |
| 16         |           |           |           |                               |
| 495.058991 | Kcal/mol  | 21.467817 | eV        | -100.594753 H Child_16_29.log |
| 6          | -2.317975 | -1.847159 | -0.931319 |                               |
| 6          | 4.131122  | 0.918609  | 0.121847  |                               |
| 6          | -2.752204 | -0.831657 | -0.351541 |                               |
| 6          | 3.290740  | 2.063095  | 0.034315  |                               |
| 6          | -2.752186 | 1.502860  | -0.208088 |                               |
| 8          | 2.938834  | 0.075981  | 0.258607  |                               |
| 6          | -3.175869 | 0.342132  | 0.377343  |                               |
| 6          | 2.040366  | 2.525847  | -0.169452 |                               |
| 6          | -2.041886 | 2.561403  | -0.574149 |                               |
| 6          | 2.040966  | -2.976344 | 0.076542  |                               |
| 8          | -3.816089 | 0.363254  | 1.497488  |                               |
| 6          | 2.318126  | -1.478156 | -0.374805 |                               |
| 6          | -1.166042 | 3.481999  | -0.905088 |                               |
| 6          | 1.603809  | 1.100581  | -0.054576 |                               |
| 12         | -0.521259 | -2.671683 | -1.031907 |                               |
| 12         | 0.496612  | -1.302745 | 1.340663  |                               |
| 16         |           |           |           |                               |
| 496.244149 | Kcal/mol  | 21.519210 | eV        | -100.592865 H Child_7_59.log  |
| 6          | 2.723408  | 3.838269  | 0.778127  |                               |
| 12         | -6.533983 | -0.317025 | -0.100806 |                               |
| 6          | 2.525136  | 2.580393  | 1.137828  |                               |
| 6          | -1.722804 | -2.192133 | -0.090963 |                               |
| 6          | 2.379845  | 1.339503  | 1.441396  |                               |
| 6          | -2.014662 | -0.973135 | -0.325481 |                               |
| 6          | 2.057464  | 0.062470  | 1.604101  |                               |
| 12         | -0.108472 | -2.666471 | 1.433024  |                               |
| 6          | -2.336144 | 0.273198  | -0.537501 |                               |
| 8          | 3.207299  | 0.406263  | -1.371627 |                               |
| 6          | -2.740927 | 1.484073  | -0.640846 |                               |
| 6          | 1.359465  | -1.023151 | 1.245830  |                               |
| 6          | -3.109493 | 2.740756  | -0.695206 |                               |
| 6          | 2.006539  | 0.250238  | -1.433825 |                               |
| 8          | 5.457156  | -2.562149 | -1.493074 |                               |
| 6          | 0.604477  | 0.461026  | -1.328292 |                               |
| 16         |           |           |           |                               |
| 497.848587 | Kcal/mol  | 21.588785 | eV        | -100.590308 H Child_1_34.log  |
| 6          | 0.183144  | 1.313994  | 1.623279  |                               |
| 6          | -1.696652 | -2.163864 | -1.227243 |                               |
| 6          | 1.912596  | 3.655211  | -0.875177 |                               |
| 6          | -2.647548 | -1.184362 | -1.104696 |                               |
| 6          | -4.927200 | 2.471594  | 0.696118  |                               |
| 6          | -0.615165 | -2.069973 | -0.364550 |                               |

|                                                |           |           |           |                |
|------------------------------------------------|-----------|-----------|-----------|----------------|
| 8                                              | -0.658311 | 1.566380  | 0.764478  |                |
| 6                                              | 0.578101  | -2.532599 | -0.151150 |                |
| 6                                              | 1.543954  | 2.403833  | -1.193140 |                |
| 8                                              | 1.709875  | -2.690512 | 0.245701  |                |
| 12                                             | 1.195566  | -0.799116 | 1.378224  |                |
| 6                                              | -3.264263 | -0.056712 | -0.977539 |                |
| 6                                              | 3.822231  | 0.370973  | -0.386270 |                |
| 6                                              | 1.366902  | 1.123377  | -0.948769 |                |
| 12                                             | -1.318275 | -0.192831 | 0.535430  |                |
| 6                                              | 2.587234  | 0.151265  | -0.265076 |                |
| 16                                             |           |           |           |                |
| 503.354056 Kcal/mol 21.827525 eV -100.581534 H |           |           |           | Child_1_58.log |
| 8                                              | 2.529149  | -2.543826 | 1.712804  |                |
| 12                                             | -2.250935 | 2.248843  | 0.681097  |                |
| 6                                              | 4.119228  | 0.608669  | -0.541250 |                |
| 8                                              | -4.041866 | -0.295118 | -0.097724 |                |
| 12                                             | 2.372974  | -1.352350 | 0.180310  |                |
| 6                                              | -0.166361 | 2.782158  | 0.890306  |                |
| 6                                              | 1.468997  | 0.819264  | 0.642735  |                |
| 6                                              | -0.804388 | 0.766834  | -0.257593 |                |
| 6                                              | -2.033765 | -3.292753 | 0.057711  |                |
| 6                                              | -2.955407 | -0.818470 | -0.369851 |                |
| 6                                              | 1.018576  | -0.105454 | -1.580947 |                |
| 6                                              | 0.289438  | 1.599858  | 0.369850  |                |
| 6                                              | 3.136626  | 1.333582  | -1.059945 |                |
| 6                                              | -1.608092 | -0.383703 | -0.236569 |                |
| 6                                              | 1.762268  | 0.804874  | -0.898575 |                |
| 6                                              | -2.454241 | -2.122588 | -0.892127 |                |
| 16                                             |           |           |           |                |
| 505.045785 Kcal/mol 21.900886 eV -100.578838 H |           |           |           | MutI_14_79.log |
| 6                                              | 3.238851  | 0.953234  | -0.454546 |                |
| 6                                              | 3.194041  | -3.830497 | -1.153731 |                |
| 6                                              | -3.379186 | -1.284107 | -0.466435 |                |
| 6                                              | -1.746423 | 0.520449  | -1.197922 |                |
| 6                                              | -2.614649 | -0.452597 | -0.848963 |                |
| 6                                              | 0.615829  | 0.077018  | 2.232211  |                |
| 6                                              | 2.817834  | -1.463842 | -0.316786 |                |
| 6                                              | -0.708934 | 2.900624  | -0.731485 |                |
| 12                                             | -4.635753 | -2.439727 | 0.326665  |                |
| 12                                             | 1.258444  | 2.057493  | -0.107890 |                |
| 6                                              | -1.637167 | 4.109983  | -0.587957 |                |
| 6                                              | -1.180443 | 1.581101  | -1.035713 |                |
| 8                                              | 2.824102  | -0.316951 | -0.038310 |                |
| 6                                              | -0.063328 | 0.285564  | 3.368269  |                |
| 6                                              | 2.936752  | -2.673503 | -0.653296 |                |
| 8                                              | 1.136979  | 0.347731  | 1.094914  |                |
| 16                                             |           |           |           |                |
| 506.719092 Kcal/mol 21.973447 eV -100.576172 H |           |           |           |                |
| Original3D_0_60.log                            |           |           |           |                |
| 6                                              | -1.824161 | -0.865734 | -0.297414 |                |
| 6                                              | -0.646457 | -0.209701 | -0.717041 |                |
| 6                                              | -2.700324 | 0.857809  | 0.982954  |                |
| 6                                              | -3.230773 | 0.038786  | 1.911339  |                |
| 6                                              | 0.005832  | -1.461446 | -0.588046 |                |
| 6                                              | -3.886958 | -0.872970 | -0.845263 |                |

|            |           |           |           |                              |
|------------|-----------|-----------|-----------|------------------------------|
| 12         | 0.792539  | 1.334727  | -1.013552 |                              |
| 6          | 2.475525  | 0.287462  | -0.118932 |                              |
| 6          | 1.944950  | 0.541668  | 1.153908  |                              |
| 6          | -0.379879 | 3.544496  | -0.378503 |                              |
| 12         | 3.436000  | -1.187324 | 1.148355  |                              |
| 8          | 1.017097  | -2.060935 | -0.761376 |                              |
| 6          | -3.145873 | 0.026090  | -0.224917 |                              |
| 8          | -1.455645 | -2.160322 | 0.049799  |                              |
| 6          | 3.775070  | 0.630853  | -0.859442 |                              |
| 6          | -0.259299 | 2.816224  | 0.660519  |                              |
| 16         |           |           |           |                              |
| 509.690895 | Kcal/mol  | 22.102317 | eV        | -100.571436 H Child_6_10.log |
| 8          | 3.018653  | 4.404970  | -0.419932 |                              |
| 12         | -7.359226 | 0.527648  | -0.014620 |                              |
| 6          | 2.961467  | 3.280561  | -0.159500 |                              |
| 8          | -5.540691 | 0.194286  | 0.020527  |                              |
| 6          | 2.878934  | 2.083057  | 0.219364  |                              |
| 6          | -4.344420 | -0.062702 | 0.077384  |                              |
| 12         | -2.440185 | -0.395133 | 0.122158  |                              |
| 6          | 2.811005  | 0.903768  | -0.230477 |                              |
| 6          | 2.694586  | -0.339592 | 0.211409  |                              |
| 6          | 0.194512  | -0.957891 | 0.107142  |                              |
| 6          | 1.966527  | -2.262539 | -1.197656 |                              |
| 6          | 1.473347  | -1.305922 | 0.051812  |                              |
| 6          | 3.336832  | -1.609037 | 0.154865  |                              |
| 6          | 2.823379  | -0.919003 | 1.652673  |                              |
| 6          | 4.649477  | -1.802432 | 0.132941  |                              |
| 6          | 1.515891  | -3.405639 | -0.702494 |                              |
| 16         |           |           |           |                              |
| 510.185664 | Kcal/mol  | 22.123772 | eV        | -100.570647 H Child_9_50.log |
| 8          | 0.073736  | -1.997876 | 1.209163  |                              |
| 6          | -1.487602 | 2.822326  | 0.179308  |                              |
| 8          | 2.882259  | -2.134678 | -1.194420 |                              |
| 6          | -0.225824 | 2.980423  | 0.061707  |                              |
| 6          | 1.815525  | -1.925788 | -0.716657 |                              |
| 6          | 1.063144  | 2.660397  | -0.213253 |                              |
| 6          | 0.625448  | -1.794752 | -0.185502 |                              |
| 12         | -2.969319 | 1.339000  | -0.036820 |                              |
| 6          | 4.103500  | -0.341577 | 1.502894  |                              |
| 6          | -0.702117 | -1.297454 | 0.130468  |                              |
| 6          | -5.381836 | -0.209536 | 0.140314  |                              |
| 6          | 4.812177  | 0.337703  | 0.643441  |                              |
| 6          | 2.167130  | 2.121989  | -0.500508 |                              |
| 12         | -3.125638 | -1.699333 | -0.177548 |                              |
| 6          | 3.267001  | 1.402128  | -0.671827 |                              |
| 6          | -1.807960 | -0.525120 | 0.038692  |                              |
| 16         |           |           |           |                              |
| 516.127905 | Kcal/mol  | 22.381452 | eV        | -100.561178 H Child_4_26.log |
| 6          | -6.977372 | -0.774622 | -1.099857 |                              |
| 8          | 5.521911  | -1.112950 | -0.536652 |                              |
| 6          | -5.957034 | -0.661082 | -0.357409 |                              |
| 6          | 4.378522  | -1.002997 | -0.286759 |                              |
| 12         | -4.318404 | 0.229811  | 0.130138  |                              |
| 6          | 2.155652  | -1.849952 | 0.262195  |                              |
| 8          | -2.740386 | 1.494466  | -0.034128 |                              |

|            |           |           |           |                               |
|------------|-----------|-----------|-----------|-------------------------------|
| 6          | 3.089510  | -0.816933 | 0.041463  |                               |
| 6          | -1.747737 | 0.766989  | -0.320115 |                               |
| 6          | 2.217480  | 1.105775  | 1.408993  |                               |
| 6          | -0.600760 | 0.135386  | -0.872911 |                               |
| 6          | 0.920123  | -1.664853 | 0.562609  |                               |
| 6          | -1.453737 | -0.685583 | -0.242368 |                               |
| 6          | 2.560387  | 0.584309  | 0.274658  |                               |
| 6          | 6.072876  | 2.472766  | -1.721986 |                               |
| 12         | 0.135101  | 0.711244  | 1.426125  |                               |
| 16         |           |           |           |                               |
| 516.205653 | Kcal/mol  | 22.384824 | eV        | -100.561054 H Child_2_29.log  |
| 8          | 0.187242  | 3.929494  | -1.174120 |                               |
| 6          | -4.057726 | -2.359230 | -0.039856 |                               |
| 12         | 0.891335  | 2.735486  | 0.052651  |                               |
| 6          | -2.629280 | -2.891872 | -0.259600 |                               |
| 6          | -4.478863 | 1.668664  | 0.505912  |                               |
| 6          | 2.278840  | -2.187576 | 0.199999  |                               |
| 6          | 2.461758  | 1.597210  | 0.804895  |                               |
| 12         | 4.468115  | -2.197330 | -0.497756 |                               |
| 6          | -4.135352 | 0.442301  | 0.143680  |                               |
| 6          | 2.609180  | -0.926805 | 0.279152  |                               |
| 6          | 1.360073  | 0.785616  | 1.391955  |                               |
| 6          | -3.922273 | -0.843158 | 0.084476  |                               |
| 6          | 2.212658  | 0.300932  | 0.848320  |                               |
| 6          | -2.692855 | -1.522713 | -0.071885 |                               |
| 6          | 0.249426  | 0.407813  | -0.899369 |                               |
| 8          | -0.168108 | -0.590116 | -0.398982 |                               |
| 16         |           |           |           |                               |
| 516.930742 | Kcal/mol  | 22.416267 | eV        | -100.559898 H Child_4_36.log  |
| 6          | 1.584690  | -1.579045 | 1.299608  |                               |
| 8          | -3.929258 | 3.117467  | -0.031586 |                               |
| 6          | -0.434860 | -2.206201 | -0.309451 |                               |
| 6          | 8.215137  | 2.432138  | -0.362560 |                               |
| 6          | 0.914345  | -1.870827 | -0.195388 |                               |
| 6          | -3.921763 | 1.892860  | -0.011872 |                               |
| 8          | 2.874232  | -0.975646 | 1.036957  |                               |
| 6          | 7.321567  | 1.485541  | -0.272637 |                               |
| 6          | -1.304934 | 1.314473  | 0.354766  |                               |
| 6          | -1.666695 | -1.965739 | -0.359895 |                               |
| 6          | -2.563334 | 1.021783  | 0.268755  |                               |
| 6          | 3.142814  | -1.118412 | -0.320367 |                               |
| 6          | 6.377725  | 0.631789  | 0.044394  |                               |
| 6          | 1.955461  | -1.799996 | -1.129730 |                               |
| 12         | -5.569728 | -0.020930 | -0.254317 |                               |
| 12         | -3.536999 | -0.526132 | 0.081259  |                               |
| 16         |           |           |           |                               |
| 516.998500 | Kcal/mol  | 22.419205 | eV        | -100.559790 H Child_16_30.log |
| 12         | -8.681104 | 0.740074  | -0.057676 |                               |
| 6          | 9.003859  | -0.327130 | -0.101690 |                               |
| 8          | -6.870610 | 0.043234  | 0.236946  |                               |
| 6          | 7.714604  | -0.135175 | -0.087717 |                               |
| 6          | -5.609420 | -0.206267 | 0.097444  |                               |
| 6          | 6.463987  | 0.214135  | -0.094730 |                               |
| 6          | -4.401127 | -0.483229 | -0.040790 |                               |
| 6          | 5.242076  | 0.607781  | -0.099271 |                               |



|                                                |           |           |           |                |
|------------------------------------------------|-----------|-----------|-----------|----------------|
| 6                                              | -3.064787 | -0.634650 | -0.172806 |                |
| 6                                              | 4.032637  | 1.054122  | -0.102810 |                |
| 6                                              | 1.736318  | -0.404624 | 1.305946  |                |
| 6                                              | 2.757884  | 1.371953  | -0.061674 |                |
| 6                                              | -1.810477 | -0.717319 | -0.374804 |                |
| 6                                              | 1.462280  | 1.099248  | 0.067679  |                |
| 12                                             | 0.233100  | -0.854262 | -0.687279 |                |
| 8                                              | 1.896742  | -0.951086 | 0.629403  |                |
| 16                                             |           |           |           |                |
| 519.883396 Kcal/mol 22.544306 eV -100.555193 H |           |           |           | Child_2_21.log |
| 8                                              | -4.975273 | 0.656019  | -0.542692 |                |
| 6                                              | 5.351953  | -1.025961 | 0.227068  |                |
| 6                                              | -3.986561 | 0.109886  | -0.277006 |                |
| 6                                              | 4.096135  | -0.678595 | 0.310216  |                |
| 6                                              | -2.809718 | -0.486453 | 0.055987  |                |
| 6                                              | 1.974701  | 1.274522  | -1.921427 |                |
| 12                                             | -0.164097 | 1.158207  | 1.566913  |                |
| 6                                              | 2.340354  | 1.047229  | -0.853469 |                |
| 6                                              | -1.626158 | 0.286584  | 0.451118  |                |
| 6                                              | 2.831770  | -0.263441 | 0.317623  |                |
| 6                                              | -2.697727 | -1.929767 | 0.224247  |                |
| 12                                             | 1.010803  | -0.624061 | -0.949950 |                |
| 6                                              | -1.054747 | -1.170231 | 0.770774  |                |
| 8                                              | -0.093654 | -1.741247 | 0.210878  |                |
| 6                                              | 1.603676  | 2.343116  | 0.928550  |                |
| 6                                              | -0.958521 | 0.871789  | -1.025188 |                |
| 16                                             |           |           |           |                |
| 523.692997 Kcal/mol 22.709506 eV -100.549122 H |           |           |           | MutI_18_39.log |
| 6                                              | 2.517723  | -1.622729 | -0.085272 |                |
| 6                                              | 0.148817  | 1.210903  | 0.358373  |                |
| 6                                              | 3.381872  | 2.029150  | -0.260543 |                |
| 12                                             | -4.389762 | -0.339729 | -0.036676 |                |
| 6                                              | 0.742872  | 2.579382  | 0.179204  |                |
| 8                                              | -2.868058 | -0.259892 | 0.194070  |                |
| 8                                              | 0.889441  | -1.357463 | 0.212222  |                |
| 6                                              | 4.281343  | 1.092361  | -0.217285 |                |
| 6                                              | 0.451046  | -0.179915 | 0.333447  |                |
| 6                                              | -7.424620 | -0.275172 | -0.435481 |                |
| 6                                              | -6.000710 | -0.444124 | -0.301065 |                |
| 6                                              | 2.066922  | 2.511204  | -0.188834 |                |
| 6                                              | 5.039560  | -2.682702 | -0.049196 |                |
| 6                                              | 4.169307  | -0.272334 | -0.291399 |                |
| 6                                              | 4.823502  | -1.387609 | -0.104351 |                |
| 12                                             | -1.389977 | 0.138759  | 0.297016  |                |
| 16                                             |           |           |           |                |
| 528.243155 Kcal/mol 22.906820 eV -100.541871 H |           |           |           | MutI_17_65.log |
| 12                                             | 4.672267  | 4.528777  | 0.000000  |                |
| 6                                              | -3.383271 | -3.390117 | 0.000000  |                |
| 6                                              | 1.129897  | -2.361208 | 0.000000  |                |
| 12                                             | -1.786739 | 0.335999  | 0.000000  |                |
| 6                                              | 0.000000  | 1.169690  | 0.000000  |                |
| 6                                              | 1.356013  | 1.422421  | 0.000000  |                |
| 6                                              | -4.084263 | -2.324051 | 0.000000  |                |
| 6                                              | -2.200130 | -2.664190 | 0.000000  |                |
| 6                                              | -0.103119 | -2.402620 | 0.000000  |                |

|                                                               |           |           |           |
|---------------------------------------------------------------|-----------|-----------|-----------|
| 6                                                             | -1.328271 | -1.832322 | 0.000000  |
| 6                                                             | 3.210339  | 3.321774  | 0.000000  |
| 6                                                             | 2.198085  | 2.588035  | 0.000000  |
| 6                                                             | -4.262714 | -1.081952 | 0.000000  |
| 6                                                             | -3.928342 | 0.125421  | 0.000000  |
| 8                                                             | 2.255884  | -2.015695 | 0.000000  |
| 8                                                             | 1.962658  | 0.290370  | 0.000000  |
| 16                                                            |           |           |           |
| 528.509669 Kcal/mol 22.918377 eV -100.541446 H MutD_18_58.log |           |           |           |
| 6                                                             | -1.083473 | 2.363598  | -1.690185 |
| 8                                                             | -4.336260 | -0.222679 | -0.194782 |
| 6                                                             | 0.392358  | -0.496131 | -0.685177 |
| 6                                                             | 1.156985  | -1.331137 | 0.190321  |
| 6                                                             | 2.774290  | -0.841482 | 0.779041  |
| 8                                                             | 4.315660  | -2.462127 | -0.813529 |
| 6                                                             | -6.736393 | -1.019590 | 0.456851  |
| 6                                                             | -5.506702 | -0.551452 | 0.237908  |
| 6                                                             | -0.553519 | 1.114983  | -0.976624 |
| 6                                                             | 1.737521  | -0.203680 | 0.912954  |
| 6                                                             | 1.799385  | 2.191595  | 1.549956  |
| 6                                                             | 3.770177  | -1.503964 | -0.392995 |
| 6                                                             | -0.617819 | -0.985678 | 0.475948  |
| 12                                                            | 3.161492  | 1.740089  | -0.317902 |
| 6                                                             | 1.672540  | 0.986624  | 1.357071  |
| 12                                                            | -2.550434 | 0.187939  | -0.117425 |
| 16                                                            |           |           |           |
| 529.068420 Kcal/mol 22.942607 eV -100.540556 H                |           |           |           |
| Original3D_0_54.log                                           |           |           |           |
| 6                                                             | 0.153084  | -0.197502 | 1.830705  |
| 6                                                             | 1.631734  | -0.748151 | 1.093492  |
| 6                                                             | 2.510710  | 0.891768  | -0.414754 |
| 6                                                             | 2.193972  | 1.620042  | -1.486821 |
| 6                                                             | 0.460635  | -0.601560 | 0.306388  |
| 12                                                            | -1.253783 | -1.177171 | -1.086029 |
| 12                                                            | -0.193462 | 1.748029  | 0.749376  |
| 6                                                             | 2.602201  | 0.446187  | 1.047945  |
| 6                                                             | 2.880200  | -0.857611 | -0.802555 |
| 6                                                             | -0.521220 | 2.721803  | -1.118101 |
| 6                                                             | -3.116171 | -1.851809 | -0.656758 |
| 6                                                             | -3.073560 | 0.658555  | 0.683846  |
| 8                                                             | 2.394633  | -1.825143 | -1.233325 |
| 6                                                             | 0.769180  | -1.377077 | 2.245990  |
| 6                                                             | -3.414293 | -0.920959 | 0.124834  |
| 8                                                             | -2.531117 | 1.131091  | -0.402354 |
| 16                                                            |           |           |           |
| 532.115973 Kcal/mol 23.074762 eV -100.535699 H                |           |           |           |
| Original3D_15_6.log                                           |           |           |           |
| 6                                                             | -0.133194 | 0.113050  | 2.167586  |
| 6                                                             | 0.293131  | -0.740004 | 1.162243  |
| 6                                                             | -1.914886 | 1.523053  | 0.921334  |
| 8                                                             | 1.955429  | -0.836075 | -0.854459 |
| 6                                                             | 3.090938  | -0.002251 | -0.407978 |
| 6                                                             | 0.987159  | -1.106185 | 0.007546  |
| 6                                                             | -0.457160 | -1.457848 | 0.084505  |
| 12                                                            | -2.345815 | -0.797402 | -0.406073 |

|    |           |           |           |
|----|-----------|-----------|-----------|
| 6  | 3.478297  | 0.874714  | -1.364243 |
| 6  | -1.072086 | 0.943703  | 1.710332  |
| 6  | -2.884629 | 2.194751  | 0.301897  |
| 6  | -4.130560 | -1.942113 | -0.599368 |
| 12 | 3.720185  | -0.581820 | 1.543595  |
| 6  | -4.009034 | -1.475234 | -1.819982 |
| 8  | 3.862908  | 1.505261  | -2.251618 |
| 6  | -3.754498 | 2.940560  | -0.297480 |

16

532.227670 Kcal/mol 23.079605 eV -100.535521 H

Original2D\_0\_18.log

|    |           |           |           |
|----|-----------|-----------|-----------|
| 12 | 0.000000  | 0.423569  | 0.000000  |
| 12 | 2.785677  | 1.369998  | 0.000000  |
| 6  | 0.238956  | 3.566594  | 0.000000  |
| 6  | 3.220941  | -0.907373 | 0.000000  |
| 6  | 1.729013  | -1.017251 | 0.000000  |
| 6  | -1.383052 | -1.485525 | -0.000000 |
| 8  | -1.568243 | 2.973226  | -0.000000 |
| 6  | 1.142095  | 2.717043  | 0.000000  |
| 6  | -2.711531 | -2.160206 | -0.000000 |
| 6  | -3.981392 | -1.519636 | -0.000000 |
| 6  | -1.785317 | -3.466180 | -0.000000 |
| 6  | 2.532526  | -2.138708 | 0.000000  |
| 6  | -2.928110 | 2.267990  | -0.000000 |
| 8  | 2.777611  | -3.370004 | 0.000000  |
| 6  | -0.641887 | -2.769265 | -0.000000 |
| 6  | -2.616088 | 3.854420  | -0.000000 |

16

533.042045 Kcal/mol 23.114920 eV -100.534223 H

Child\_3\_63.log

|    |           |           |           |
|----|-----------|-----------|-----------|
| 6  | 3.960405  | 1.114112  | 0.008561  |
| 8  | -3.313895 | -0.694515 | -1.433209 |
| 12 | 3.582794  | -0.794320 | -0.474123 |
| 6  | -2.737535 | 0.165739  | -0.743957 |
| 6  | 2.759571  | 1.464194  | 0.198057  |
| 6  | -1.892113 | -0.133371 | 0.509613  |
| 6  | 1.850168  | -2.003923 | -0.648872 |
| 6  | -1.282345 | -1.387713 | 0.563579  |
| 12 | 0.697968  | 1.682219  | 0.320054  |
| 6  | -2.412715 | 1.561660  | -1.007009 |
| 6  | 0.805056  | -1.357303 | -0.300936 |
| 6  | -1.234685 | 0.993908  | 1.091341  |
| 6  | -1.100312 | 2.569163  | -0.352060 |
| 6  | -0.403895 | -2.255758 | 0.350763  |
| 6  | -0.103644 | -0.501288 | 0.180125  |
| 8  | -1.763216 | -0.809398 | 1.777408  |

16

533.652685 Kcal/mol 23.141400 eV -100.533250 H

MutI\_14\_63.log

|    |           |           |           |
|----|-----------|-----------|-----------|
| 6  | 3.901172  | 0.309173  | 0.249106  |
| 6  | -3.383599 | 1.540420  | 0.378496  |
| 6  | 2.744519  | 0.421241  | -0.103926 |
| 6  | -2.826466 | -2.153649 | 0.421157  |
| 12 | -0.586766 | -3.593022 | -0.345779 |
| 8  | 0.678452  | -2.343816 | -0.698593 |
| 6  | -0.808178 | 4.108343  | -0.604880 |
| 6  | -2.851258 | 2.590238  | 0.129600  |

|            |            |           |           |                              |
|------------|------------|-----------|-----------|------------------------------|
| 8          | 1.504066   | -0.310166 | -0.594637 |                              |
| 12         | 5.377850   | 0.184714  | 0.710142  |                              |
| 6          | 0.310662   | 2.632813  | -0.173572 |                              |
| 6          | 1.470851   | 1.063728  | -0.373621 |                              |
| 6          | -1.942740  | 3.490214  | -0.268278 |                              |
| 6          | -3.450303  | -0.952545 | 0.580779  |                              |
| 6          | -3.619534  | 0.234543  | 0.580383  |                              |
| 6          | -2.037321  | -2.929260 | 0.180336  |                              |
| 16         |            |           |           |                              |
| 534.795298 | Kcal/mol   | 23.190948 | eV        | -100.531429 H MutI_5_77.log  |
| 6          | -1.638690  | 1.759838  | -0.276725 |                              |
| 6          | -2.194378  | 0.760398  | -0.334839 |                              |
| 8          | -2.268577  | -1.665237 | -0.270404 |                              |
| 6          | 3.025108   | 3.222245  | 0.044604  |                              |
| 8          | -2.520382  | -0.447532 | -0.357036 |                              |
| 6          | 0.005901   | -3.927445 | 0.082831  |                              |
| 6          | -0.629455  | 2.713167  | -0.224622 |                              |
| 12         | 2.660211   | -1.979583 | 0.262015  |                              |
| 6          | -7.975613  | 2.461922  | 0.864753  |                              |
| 6          | 0.460283   | 3.224033  | -0.157930 |                              |
| 12         | -1.388365  | -2.942791 | -0.153302 |                              |
| 6          | 1.033507   | -3.333569 | 0.220842  |                              |
| 6          | 3.360345   | 2.031060  | 0.102683  |                              |
| 6          | 3.382859   | 0.657111  | 0.160365  |                              |
| 6          | 1.776593   | 3.497936  | -0.073710 |                              |
| 6          | 3.235126   | -0.404923 | 0.210909  |                              |
| 16         |            |           |           |                              |
| 537.160554 | Kcal/mol   | 23.293516 | eV        | -100.527660 H MutD_1_78.log  |
| 6          | 4.945612   | 0.368025  | 0.493564  |                              |
| 6          | 10.836548  | 0.153928  | 0.381673  |                              |
| 6          | -2.098864  | 0.064704  | 0.256725  |                              |
| 6          | 2.399935   | -0.225270 | 0.618612  |                              |
| 12         | 0.053279   | 1.505934  | -0.206061 |                              |
| 6          | -3.074307  | -0.114428 | 0.090990  |                              |
| 6          | 5.951277   | -0.382715 | -0.236357 |                              |
| 6          | -8.341552  | -0.305292 | -0.110212 |                              |
| 6          | 8.465504   | -0.379244 | -0.240824 |                              |
| 6          | 7.210967   | -0.434844 | -0.288724 |                              |
| 6          | -5.828730  | -0.211922 | -0.035226 |                              |
| 8          | 3.321889   | -0.311765 | -0.234930 |                              |
| 6          | 9.745858   | -0.327794 | -0.177807 |                              |
| 12         | -10.413529 | -0.149291 | 0.024205  |                              |
| 8          | -7.090141  | -0.211092 | -0.034874 |                              |
| 6          | -4.467414  | -0.221292 | -0.028965 |                              |
| 16         |            |           |           |                              |
| 537.859063 | Kcal/mol   | 23.323806 | eV        | -100.526547 H MutI_18_33.log |
| 6          | -1.933307  | -2.843820 | -0.000000 |                              |
| 12         | -4.462018  | 2.891540  | 0.000000  |                              |
| 6          | -6.466987  | 3.795797  | 0.000000  |                              |
| 6          | 0.585860   | -2.103377 | -0.000000 |                              |
| 6          | -2.721060  | 2.208633  | 0.000000  |                              |
| 6          | 2.515036   | 1.170256  | 0.000000  |                              |
| 6          | -0.647960  | -2.663764 | -0.000000 |                              |
| 6          | 3.565322   | 0.445698  | -0.000000 |                              |
| 8          | -1.779955  | 1.342759  | 0.000000  |                              |

|                                                |           |           |           |                 |
|------------------------------------------------|-----------|-----------|-----------|-----------------|
| 6                                              | -1.992540 | -0.092567 | 0.000000  |                 |
| 12                                             | 4.068780  | -2.454315 | -0.000000 |                 |
| 6                                              | 1.255139  | 0.641407  | 0.000000  |                 |
| 6                                              | 1.248781  | -0.841778 | -0.000000 |                 |
| 6                                              | 0.000000  | 0.493611  | 0.000000  |                 |
| 6                                              | 1.993619  | -2.062280 | -0.000000 |                 |
| 8                                              | 4.318383  | -0.609459 | -0.000000 |                 |
| 16                                             |           |           |           |                 |
| 540.908426 Kcal/mol 23.456039 eV -100.521687 H |           |           |           | Child_15_19.log |
| 12                                             | -7.377399 | -1.322379 | -0.515625 |                 |
| 12                                             | 4.335295  | -2.206218 | -0.989657 |                 |
| 6                                              | -5.580628 | -0.701750 | -0.137562 |                 |
| 6                                              | 4.302069  | -3.925693 | 1.321538  |                 |
| 6                                              | -4.361164 | -0.337489 | 0.068069  |                 |
| 8                                              | 4.519672  | -0.383598 | 0.227603  |                 |
| 6                                              | -3.166006 | 0.052960  | 0.298551  |                 |
| 6                                              | 3.505804  | -0.283219 | -0.647347 |                 |
| 8                                              | -2.025354 | 0.435898  | 0.537358  |                 |
| 6                                              | 2.277016  | 0.316514  | -0.286876 |                 |
| 6                                              | -0.879139 | 0.807679  | 0.794911  |                 |
| 6                                              | 1.799373  | 1.515427  | -0.531836 |                 |
| 6                                              | 0.267799  | 1.156925  | 1.064649  |                 |
| 6                                              | 1.545765  | 2.803577  | -0.792094 |                 |
| 6                                              | 1.571893  | 1.546123  | 1.265897  |                 |
| 6                                              | 1.475665  | 4.036408  | -0.427284 |                 |
| 16                                             |           |           |           |                 |
| 546.050398 Kcal/mol 23.679016 eV -100.513493 H |           |           |           | Child_14_31.log |
| 6                                              | -3.017217 | 2.448513  | -0.096771 |                 |
| 12                                             | 5.199438  | -0.263195 | -0.217405 |                 |
| 6                                              | -2.670647 | 2.900715  | 1.045937  |                 |
| 6                                              | -0.016923 | -2.287035 | 0.806052  |                 |
| 6                                              | -3.105416 | 1.616471  | -1.161639 |                 |
| 6                                              | 3.025365  | -0.857414 | -0.022161 |                 |
| 6                                              | -2.630951 | 0.441936  | -1.155697 |                 |
| 6                                              | 0.952796  | -1.419605 | 0.861419  |                 |
| 12                                             | -1.498526 | 1.077276  | 1.253495  |                 |
| 6                                              | -1.222942 | -2.558243 | 0.417755  |                 |
| 6                                              | -2.019051 | -0.473206 | -0.435022 |                 |
| 6                                              | 1.978236  | -0.547754 | 0.720311  |                 |
| 6                                              | 5.434953  | 2.782363  | -0.136817 |                 |
| 6                                              | -2.339852 | -2.081548 | -0.085425 |                 |
| 8                                              | 2.959853  | 0.141365  | -1.267903 |                 |
| 8                                              | -4.287485 | -1.336382 | -0.854688 |                 |
| 16                                             |           |           |           |                 |
| 547.374024 Kcal/mol 23.736414 eV -100.511384 H |           |           |           | MutI_17_41.log  |
| 6                                              | -4.261508 | -3.520784 | -0.000000 |                 |
| 8                                              | 1.957556  | -1.404887 | 0.000000  |                 |
| 6                                              | -5.280872 | -4.269683 | -0.000000 |                 |
| 6                                              | 0.000000  | 1.055649  | -0.000000 |                 |
| 8                                              | 0.599926  | -2.561427 | 0.000000  |                 |
| 6                                              | -0.777107 | -2.669017 | -0.000000 |                 |
| 6                                              | 1.815085  | 4.006062  | 0.000000  |                 |
| 12                                             | -2.931765 | -2.183529 | -0.000000 |                 |
| 6                                              | -1.040775 | 0.266749  | -0.000000 |                 |
| 6                                              | 1.418942  | 1.002298  | 0.000000  |                 |

|                                                |           |           |            |
|------------------------------------------------|-----------|-----------|------------|
| 6                                              | 3.298754  | 4.753480  | 0.000000   |
| 12                                             | -0.154582 | 3.261482  | -0.000000  |
| 6                                              | 3.730419  | 2.799813  | 0.000000   |
| 6                                              | -1.177192 | -1.244777 | -0.000000  |
| 6                                              | 2.151910  | -0.189593 | 0.000000   |
| 6                                              | 2.885064  | 1.142314  | 0.000000   |
| 16                                             |           |           |            |
| 547.970095 Kcal/mol 23.762262 eV -100.510434 H |           |           |            |
| Original1D_14_0.log                            |           |           |            |
| 8                                              | 0.000000  | 0.000000  | 4.616886   |
| 6                                              | 0.000000  | 0.000000  | 3.336600   |
| 6                                              | 0.000000  | 0.000000  | 2.058567   |
| 6                                              | 0.000000  | 0.000000  | 5.918201   |
| 6                                              | 0.000000  | 0.000000  | 0.744764   |
| 6                                              | 0.000000  | 0.000000  | -0.576107  |
| 6                                              | 0.000000  | 0.000000  | -1.765419  |
| 12                                             | 0.000000  | 0.000000  | -3.531495  |
| 8                                              | 0.000000  | 0.000000  | -5.978050  |
| 6                                              | 0.000000  | 0.000000  | -7.231014  |
| 6                                              | 0.000000  | 0.000000  | 7.169070   |
| 6                                              | 0.000000  | 0.000000  | -8.479010  |
| 6                                              | 0.000000  | 0.000000  | -9.843588  |
| 6                                              | 0.000000  | 0.000000  | -11.147309 |
| 6                                              | 0.000000  | 0.000000  | 8.408704   |
| 12                                             | 0.000000  | 0.000000  | 10.142209  |
| 16                                             |           |           |            |
| 551.129809 Kcal/mol 23.899281 eV -100.505399 H |           |           |            |
| Child_1_17.log                                 |           |           |            |
| 6                                              | 4.154729  | -2.945585 | -0.974900  |
| 8                                              | -3.945099 | 3.315038  | -0.206429  |
| 6                                              | 3.308097  | -2.051607 | -0.595890  |
| 6                                              | -3.100849 | 2.482697  | -0.201550  |
| 6                                              | 1.371293  | -1.316680 | 2.242743   |
| 6                                              | -2.295509 | 1.440722  | -0.203115  |
| 6                                              | 2.323422  | -1.212650 | -0.287197  |
| 12                                             | 4.173457  | 2.454856  | 1.047766   |
| 12                                             | -5.110281 | -2.642307 | 0.689492   |
| 6                                              | -0.952299 | 1.194210  | -0.115781  |
| 6                                              | 1.485090  | -0.913616 | 0.977472   |
| 6                                              | 1.541911  | -0.137242 | -0.934932  |
| 6                                              | -0.389707 | -0.123652 | -0.034725  |
| 6                                              | -4.337053 | -1.344850 | -0.632343  |
| 6                                              | 2.174076  | 0.246819  | 0.313873   |
| 8                                              | 1.387933  | 0.477214  | -2.064700  |
| 16                                             |           |           |            |
| 556.922438 Kcal/mol 24.150473 eV -100.496168 H |           |           |            |
| Child_2_61.log                                 |           |           |            |
| 6                                              | -6.301415 | -1.868074 | -0.163225  |
| 6                                              | 3.425041  | -3.144613 | -0.318391  |
| 6                                              | 0.712178  | 4.820497  | 0.006114   |
| 6                                              | 3.632808  | -1.932635 | -0.206593  |
| 6                                              | -5.051321 | -1.382378 | -0.139543  |
| 6                                              | 3.406937  | -0.623137 | -0.135080  |
| 6                                              | 0.106994  | 3.816512  | -0.006574  |
| 12                                             | 1.533793  | -2.580041 | 0.103739   |
| 12                                             | -1.987173 | 0.966630  | -0.087900  |
| 6                                              | 2.709886  | 0.622417  | -0.017967  |

|                                                                |           |           |            |
|----------------------------------------------------------------|-----------|-----------|------------|
| 6                                                              | -3.874019 | -0.862519 | -0.088565  |
| 6                                                              | -0.398833 | -1.508639 | 0.803083   |
| 6                                                              | -0.386820 | 2.479965  | -0.040839  |
| 6                                                              | -0.313920 | -0.153386 | 0.281180   |
| 8                                                              | 1.373796  | 2.895959  | 0.001174   |
| 8                                                              | 1.055638  | -0.673852 | -0.005133  |
| 16                                                             |           |           |            |
| 557.933606 Kcal/mol 24.194322 eV -100.494556 H Child_8_39.log  |           |           |            |
| 6                                                              | 4.250506  | 1.099618  | 0.440328   |
| 6                                                              | -5.077205 | -0.545299 | 0.019825   |
| 6                                                              | 2.955775  | 1.167840  | 0.107660   |
| 6                                                              | -3.735952 | -0.881927 | -0.030720  |
| 12                                                             | 0.935053  | 2.131557  | 0.133998   |
| 6                                                              | -2.641153 | -1.527491 | -0.034456  |
| 6                                                              | 3.343027  | -0.229986 | -0.100433  |
| 6                                                              | -4.143344 | 0.618211  | 0.046815   |
| 6                                                              | 3.922376  | -1.652849 | -0.149765  |
| 6                                                              | -1.464722 | -1.816403 | 0.005917   |
| 6                                                              | -0.469001 | 2.865510  | -1.460069  |
| 8                                                              | -0.262972 | -2.211545 | 0.049381   |
| 8                                                              | -0.262564 | 1.477983  | 1.096291   |
| 6                                                              | -3.545077 | 1.851044  | -0.029641  |
| 6                                                              | 2.641584  | -1.201465 | -0.767210  |
| 12                                                             | 1.396896  | -1.515918 | 0.078096   |
| 16                                                             |           |           |            |
| 560.038363 Kcal/mol 24.285593 eV -100.491202 H                 |           |           |            |
| OriginalID_5_0.log                                             |           |           |            |
| 8                                                              | 0.000000  | 0.000000  | 8.367857   |
| 12                                                             | 0.000000  | 0.000000  | 9.687857   |
| 6                                                              | 0.000000  | 0.000000  | 7.047857   |
| 12                                                             | 0.000000  | 0.000000  | 5.727857   |
| 8                                                              | 0.000000  | 0.000000  | 3.087857   |
| 6                                                              | 0.000000  | 0.000000  | 1.767857   |
| 6                                                              | 0.000000  | 0.000000  | 0.447857   |
| 6                                                              | 0.000000  | 0.000000  | -0.872143  |
| 6                                                              | 0.000000  | 0.000000  | -2.192143  |
| 6                                                              | 0.000000  | 0.000000  | -3.512143  |
| 6                                                              | 0.000000  | 0.000000  | -4.832143  |
| 6                                                              | 0.000000  | 0.000000  | -6.152143  |
| 6                                                              | 0.000000  | 0.000000  | -7.472143  |
| 6                                                              | 0.000000  | 0.000000  | -8.792143  |
| 6                                                              | 0.000000  | 0.000000  | -10.112143 |
| 6                                                              | 0.000000  | 0.000000  | -11.432143 |
| 16                                                             |           |           |            |
| 560.358175 Kcal/mol 24.299461 eV -100.490692 H Child_10_11.log |           |           |            |
| 12                                                             | -2.753500 | 2.010154  | -0.151113  |
| 6                                                              | 2.432544  | 0.093328  | 1.177557   |
| 6                                                              | -2.653034 | -0.046464 | -0.018116  |
| 6                                                              | 3.428985  | -0.207297 | 0.202107   |
| 6                                                              | -0.723704 | 1.515919  | -0.214068  |
| 6                                                              | 1.274095  | 0.191514  | 1.732155   |
| 6                                                              | -3.407855 | -1.083690 | 0.114736   |
| 6                                                              | 3.119384  | -1.354166 | -0.450464  |
| 8                                                              | -4.205672 | -1.968816 | 0.232123   |
| 6                                                              | 2.153953  | -2.020350 | -0.717555  |

|            |           |           |           |                               |
|------------|-----------|-----------|-----------|-------------------------------|
| 8          | 0.519168  | 1.848647  | -0.292473 |                               |
| 6          | -1.225132 | 0.154836  | -0.112114 |                               |
| 6          | 0.798895  | -2.206102 | -0.413155 |                               |
| 12         | 2.359059  | 1.621077  | -0.362523 |                               |
| 6          | -0.340688 | -0.810154 | -0.095284 |                               |
| 6          | 0.846779  | -1.329611 | -0.098060 |                               |
| 16         |           |           |           |                               |
| 560.851622 | Kcal/mol  | 24.320859 | eV        | -100.489906 H Child_18_26.log |
| 6          | -0.105765 | -1.786535 | -0.168507 |                               |
| 6          | -1.982467 | 2.709557  | 0.261265  |                               |
| 6          | -1.401573 | -1.497232 | -0.461022 |                               |
| 6          | -0.632573 | 2.414143  | 0.077548  |                               |
| 12         | -3.469440 | -1.488165 | -0.251783 |                               |
| 6          | 0.611425  | 2.237303  | 0.059898  |                               |
| 6          | 0.866967  | -1.872281 | 0.500879  |                               |
| 8          | -2.686188 | 1.522491  | -0.224595 |                               |
| 6          | -5.667896 | -1.294936 | 0.056902  |                               |
| 12         | 2.517897  | 1.225720  | 0.029228  |                               |
| 6          | 7.946671  | -0.890269 | 0.066658  |                               |
| 8          | -5.126758 | -0.626393 | 0.879607  |                               |
| 6          | 6.600409  | -0.685041 | 0.038244  |                               |
| 6          | -3.393568 | 0.756852  | -0.770700 |                               |
| 6          | 4.213239  | -0.355044 | -0.134835 |                               |
| 6          | 5.265478  | -0.406426 | 0.045432  |                               |
| 16         |           |           |           |                               |
| 562.808418 | Kcal/mol  | 24.405714 | eV        | -100.486788 H Child_11_56.log |
| 8          | -1.273437 | 4.856338  | -0.004328 |                               |
| 6          | -3.189676 | -2.559977 | -0.405124 |                               |
| 6          | 3.995014  | -0.355841 | 0.452208  |                               |
| 12         | -5.058246 | -1.829808 | 0.050452  |                               |
| 6          | -1.632132 | 3.673871  | 0.044179  |                               |
| 6          | -1.955928 | -2.370169 | -0.376035 |                               |
| 6          | 2.734213  | -0.729496 | 0.587992  |                               |
| 12         | -0.173483 | -1.571281 | -0.215897 |                               |
| 6          | 1.525309  | -1.290724 | 1.013814  |                               |
| 6          | -3.775746 | 0.554197  | 0.080172  |                               |
| 6          | -2.111905 | 2.458612  | -0.063313 |                               |
| 6          | -2.810046 | 1.416027  | -0.064157 |                               |
| 6          | 5.125137  | 0.006577  | -0.330520 |                               |
| 6          | 1.267691  | -0.038645 | 0.265215  |                               |
| 6          | 4.907688  | -1.473041 | -0.102434 |                               |
| 8          | 6.061315  | 0.776751  | -0.574002 |                               |
| 16         |           |           |           |                               |
| 572.431995 | Kcal/mol  | 24.823032 | eV        | -100.471451 H Child_5_47.log  |
| 6          | -3.150434 | 2.437473  | 0.170889  |                               |
| 12         | 0.351851  | -2.970450 | -0.003713 |                               |
| 6          | -1.698084 | 2.346489  | -0.035297 |                               |
| 12         | 3.437137  | -0.457004 | -0.307219 |                               |
| 6          | -0.413822 | 2.644174  | -0.175528 |                               |
| 6          | 1.607093  | -1.281185 | -0.151730 |                               |
| 6          | -2.497083 | 1.329131  | 0.003696  |                               |
| 6          | 4.390046  | 1.373299  | -0.338068 |                               |
| 6          | 0.867136  | 2.746106  | -0.235298 |                               |
| 6          | -0.716655 | -1.348429 | 0.021979  |                               |
| 6          | 0.445352  | -0.653033 | -0.097911 |                               |



|            |           |           |           |                              |
|------------|-----------|-----------|-----------|------------------------------|
| 6          | -2.108854 | 0.114590  | -0.207720 |                              |
| 6          | -1.920996 | -1.177096 | 0.110626  |                              |
| 6          | -2.875300 | -1.812059 | -0.015883 |                              |
| 8          | 3.915237  | 0.757258  | 0.987520  |                              |
| 8          | -3.545018 | -0.655672 | 0.191563  |                              |
| 16         |           |           |           |                              |
| 573.884496 | Kcal/mol  | 24.886018 | eV        | -100.469137 H MutI_5_67.log  |
| 6          | 4.522746  | -0.809481 | 0.069327  |                              |
| 6          | 2.480854  | 2.182710  | -0.014361 |                              |
| 6          | -2.955022 | 2.263922  | 0.013666  |                              |
| 6          | -3.699993 | 1.265624  | 0.034539  |                              |
| 6          | 3.441258  | -1.408947 | -0.008138 |                              |
| 6          | -2.418169 | -2.538255 | -0.003768 |                              |
| 6          | -2.132419 | 3.307528  | -0.009094 |                              |
| 8          | -3.680209 | 0.079888  | 0.026614  |                              |
| 8          | 1.501328  | 2.946568  | -0.060674 |                              |
| 6          | 4.445678  | 0.503926  | 0.083544  |                              |
| 12         | -3.598483 | -1.433855 | 0.025019  |                              |
| 6          | -0.250848 | 3.544757  | -0.048779 |                              |
| 6          | 3.421415  | 1.318682  | 0.035239  |                              |
| 12         | 2.174584  | -2.263192 | -0.043919 |                              |
| 6          | 0.313881  | -3.089850 | -0.051440 |                              |
| 6          | -1.416410 | -3.181798 | -0.017522 |                              |
| 16         |           |           |           |                              |
| 580.724275 | Kcal/mol  | 25.182620 | eV        | -100.458237 H MutI_15_39.log |
| 6          | -4.205686 | -0.800804 | 0.000000  |                              |
| 6          | -2.038132 | 4.552682  | -0.000000 |                              |
| 8          | -1.215401 | -3.410071 | 0.000000  |                              |
| 6          | -0.000000 | 0.784062  | -0.000000 |                              |
| 8          | -3.015981 | -0.508056 | 0.000000  |                              |
| 6          | 3.336269  | 1.196041  | -0.000000 |                              |
| 6          | 0.861422  | 2.078588  | -0.000000 |                              |
| 6          | 4.658291  | 0.924359  | -0.000000 |                              |
| 6          | 2.245006  | 0.336264  | -0.000000 |                              |
| 12         | -1.318882 | 2.529891  | -0.000000 |                              |
| 6          | 1.078266  | -0.058370 | -0.000000 |                              |
| 6          | 2.146454  | 1.941966  | -0.000000 |                              |
| 6          | 5.689435  | 0.163610  | -0.000000 |                              |
| 6          | 1.531653  | -2.574652 | 0.000000  |                              |
| 12         | -3.358389 | -2.905140 | 0.000000  |                              |
| 6          | -0.306593 | -2.569079 | 0.000000  |                              |
| 16         |           |           |           |                              |
| 581.678024 | Kcal/mol  | 25.223978 | eV        | -100.456717 H MutI_4_71.log  |
| 6          | -2.001747 | -0.211050 | -0.270627 |                              |
| 8          | -4.069362 | 0.905170  | 0.481979  |                              |
| 6          | 4.527640  | -0.282012 | 0.552584  |                              |
| 6          | -1.252911 | 0.708757  | -0.413926 |                              |
| 6          | -3.390663 | -0.222049 | -0.012888 |                              |
| 6          | 4.058310  | 0.889905  | 0.267467  |                              |
| 12         | 0.969278  | -2.219566 | -0.014974 |                              |
| 8          | 1.815359  | 2.412693  | -0.340530 |                              |
| 6          | -4.781042 | 1.784765  | 0.961642  |                              |
| 12         | -0.015023 | 1.839354  | -0.497698 |                              |
| 6          | -3.462498 | -2.063264 | -0.159708 |                              |
| 6          | 2.645539  | -1.647692 | 0.160161  |                              |

|            |           |           |           |                               |
|------------|-----------|-----------|-----------|-------------------------------|
| 6          | 3.591261  | -1.169919 | 0.462905  |                               |
| 6          | 3.406391  | 2.056734  | -0.015682 |                               |
| 6          | -1.629196 | -1.572832 | -0.341872 |                               |
| 6          | -0.614257 | -1.934740 | -0.353312 |                               |
| 16         |           |           |           |                               |
| 581.759917 | Kcal/mol  | 25.227530 | eV        | -100.456586 H Child_9_13.log  |
| 6          | 5.011031  | -0.467974 | -0.060872 |                               |
| 6          | -3.419334 | 0.839866  | -0.511785 |                               |
| 6          | 3.824470  | -1.001428 | 0.099339  |                               |
| 6          | -3.659649 | -0.407200 | -0.624363 |                               |
| 12         | 3.400670  | 1.170600  | -0.244578 |                               |
| 8          | -4.150189 | 2.297011  | 1.024428  |                               |
| 6          | 2.152187  | 2.869000  | 0.016560  |                               |
| 6          | -2.738021 | 2.415089  | -0.152223 |                               |
| 6          | 2.357638  | -0.918532 | 0.164896  |                               |
| 6          | -3.493272 | -1.789376 | -0.483027 |                               |
| 8          | 1.721604  | -2.148803 | 0.383732  |                               |
| 6          | -2.927025 | -2.905339 | -0.234464 |                               |
| 6          | 0.873407  | 3.096435  | 0.142474  |                               |
| 6          | -0.295552 | 3.072079  | -0.348377 |                               |
| 12         | -0.836902 | -2.539732 | 0.537782  |                               |
| 6          | 0.424700  | -2.261966 | -0.472114 |                               |
| 16         |           |           |           |                               |
| 582.765726 | Kcal/mol  | 25.271146 | eV        | -100.454984 H Child_12_45.log |
| 8          | -5.977963 | 1.744594  | 0.060460  |                               |
| 6          | 6.574349  | 0.450899  | 1.299339  |                               |
| 6          | -4.888279 | 2.446730  | -0.372381 |                               |
| 6          | 6.776528  | 1.210291  | 0.159888  |                               |
| 6          | -5.774119 | 0.449062  | 0.429104  |                               |
| 8          | 7.135813  | 1.934333  | -0.682262 |                               |
| 6          | -5.158786 | -0.596914 | 0.686947  |                               |
| 6          | 5.464105  | 0.158962  | 0.619474  |                               |
| 6          | -3.691546 | 1.839175  | -0.387366 |                               |
| 6          | 4.304242  | -0.351081 | 0.212886  |                               |
| 6          | -2.668059 | 1.103080  | -0.349725 |                               |
| 6          | 3.238169  | -0.841214 | -0.207081 |                               |
| 12         | -3.268620 | -1.379778 | 0.428635  |                               |
| 12         | 1.369155  | -1.661880 | -0.708807 |                               |
| 6          | -0.454533 | -2.412143 | -0.722371 |                               |
| 6          | -1.466941 | -2.278765 | 0.020698  |                               |
| 16         |           |           |           |                               |
| 583.929897 | Kcal/mol  | 25.321629 | eV        | -100.453128 H Child_8_32.log  |
| 6          | -3.493650 | 2.882418  | -0.672534 |                               |
| 8          | 4.901028  | -1.458645 | 0.772071  |                               |
| 12         | -6.890278 | 0.179415  | 0.522842  |                               |
| 6          | 2.613820  | -1.580085 | -0.417038 |                               |
| 6          | -3.348649 | 1.623416  | -0.444779 |                               |
| 6          | 1.444177  | -1.861320 | -0.243171 |                               |
| 6          | 3.296405  | 3.102084  | -0.194405 |                               |
| 6          | 3.820496  | -1.004889 | -0.158255 |                               |
| 6          | 2.779181  | 2.269022  | 0.672749  |                               |
| 6          | 0.104288  | -2.004996 | -0.128686 |                               |
| 6          | -3.212306 | 0.340465  | -0.202925 |                               |
| 6          | -1.129517 | -2.006639 | -0.179698 |                               |
| 6          | 2.343651  | 1.282488  | 1.459428  |                               |

|            |           |           |           |                              |
|------------|-----------|-----------|-----------|------------------------------|
| 12         | 4.248052  | 1.007834  | -0.656971 |                              |
| 6          | -3.252803 | -0.870458 | 0.177901  |                              |
| 8          | -2.411509 | -1.950856 | -0.322318 |                              |
| 16         |           |           |           |                              |
| 584.087591 | Kcal/mol  | 25.328467 | eV        | -100.452877 H Child_2_20.log |
| 6          | -3.659772 | -2.200996 | 0.227428  |                              |
| 8          | 2.588653  | 1.991404  | -1.050924 |                              |
| 8          | -2.124019 | -1.959623 | -1.189434 |                              |
| 6          | 1.817510  | 1.359359  | -0.305062 |                              |
| 6          | -3.099146 | -1.225744 | -0.618158 |                              |
| 6          | 0.513540  | 1.706740  | 0.143417  |                              |
| 6          | -3.564047 | -0.302174 | 0.649893  |                              |
| 12         | -2.655236 | 2.318705  | -0.113833 |                              |
| 12         | -0.096686 | -0.646356 | 0.327350  |                              |
| 6          | -0.685677 | 1.238378  | 0.148347  |                              |
| 6          | 3.056606  | -1.644346 | 0.038474  |                              |
| 6          | 2.049225  | -0.038955 | 0.173678  |                              |
| 6          | 3.291920  | -0.551875 | 0.458035  |                              |
| 6          | -1.444491 | 0.624526  | 1.589843  |                              |
| 6          | 4.392702  | -1.206772 | 0.793843  |                              |
| 6          | 2.215963  | -1.145214 | -0.739629 |                              |
| 16         |           |           |           |                              |
| 585.661418 | Kcal/mol  | 25.396715 | eV        | -100.450369 H Child_7_29.log |
| 6          | 3.817336  | -3.872817 | -0.059791 |                              |
| 6          | -4.869259 | 1.582957  | -0.138155 |                              |
| 6          | 4.658113  | -2.894477 | -0.003579 |                              |
| 6          | -4.432337 | 0.390403  | -0.070837 |                              |
| 12         | 2.506274  | -2.059796 | -0.068018 |                              |
| 6          | -4.928863 | -2.207418 | -0.143146 |                              |
| 6          | 2.804871  | 1.432874  | 0.273365  |                              |
| 6          | -4.075843 | -1.080648 | 0.010301  |                              |
| 6          | 2.093499  | 0.221588  | 0.108860  |                              |
| 12         | -2.209135 | 0.749832  | 0.154360  |                              |
| 6          | 0.936006  | -0.439859 | -0.071389 |                              |
| 6          | 0.207421  | 2.047276  | 0.120877  |                              |
| 8          | -0.199260 | 0.601463  | -0.065271 |                              |
| 6          | -2.923795 | -1.852921 | 0.096446  |                              |
| 6          | 1.432828  | 2.292047  | 0.129765  |                              |
| 8          | 3.713569  | 4.649230  | -0.253781 |                              |
| 16         |           |           |           |                              |
| 586.315764 | Kcal/mol  | 25.425090 | eV        | -100.449326 H Child_7_36.log |
| 6          | -2.100503 | -4.224415 | 1.507714  |                              |
| 8          | -0.849738 | 4.351669  | 0.347404  |                              |
| 6          | -1.748279 | -3.133691 | 0.884438  |                              |
| 6          | 0.136082  | 3.682237  | 0.386027  |                              |
| 6          | -7.178899 | 0.473719  | -0.403824 |                              |
| 6          | 1.143255  | 2.947201  | 0.505148  |                              |
| 6          | -1.426457 | -2.080915 | 0.144494  |                              |
| 6          | 2.118961  | 2.027292  | 0.433095  |                              |
| 8          | -6.107364 | 0.897514  | -0.319047 |                              |
| 6          | 2.921096  | 1.182283  | 0.383772  |                              |
| 6          | -0.357208 | -1.601088 | -0.901929 |                              |
| 6          | 3.687829  | -0.017800 | 0.364122  |                              |
| 6          | -1.621541 | -0.870417 | -0.565170 |                              |
| 12         | 3.533915  | -2.104425 | -0.034033 |                              |

|                                                |           |           |           |                |
|------------------------------------------------|-----------|-----------|-----------|----------------|
| 6                                              | 0.829372  | -1.478260 | -1.285393 |                |
| 12                                             | 2.902299  | 0.151896  | -0.711119 |                |
| 16                                             |           |           |           |                |
| 589.596584 Kcal/mol 25.567360 eV -100.444098 H |           |           |           | Child_4_58.log |
| 6                                              | 1.181696  | -3.594880 | -0.127511 |                |
| 6                                              | -1.612582 | 3.044510  | -0.181058 |                |
| 6                                              | 0.002449  | -4.318148 | -0.198839 |                |
| 6                                              | -0.409756 | 3.634834  | -0.160011 |                |
| 6                                              | 4.427152  | 0.454263  | 0.192674  |                |
| 6                                              | 0.898916  | 3.943377  | -0.094400 |                |
| 12                                             | 2.588904  | -0.663172 | 0.068212  |                |
| 6                                              | -1.932342 | 1.849719  | -0.115221 |                |
| 8                                              | 1.016886  | -2.135890 | -0.037960 |                |
| 8                                              | -4.582158 | -0.372250 | 0.337819  |                |
| 6                                              | 3.590469  | 1.440548  | 0.180774  |                |
| 6                                              | -3.547707 | -0.786683 | 0.065153  |                |
| 12                                             | -0.318995 | -0.809976 | -0.060406 |                |
| 6                                              | -1.432109 | 0.067527  | 0.137080  |                |
| 6                                              | 1.319982  | 1.561761  | 0.012724  |                |
| 6                                              | -2.272292 | -1.006345 | -0.126790 |                |
| 16                                             |           |           |           |                |
| 592.358504 Kcal/mol 25.687128 eV -100.439697 H |           |           |           | MutI_13_57.log |
| 6                                              | 3.467825  | -1.993173 | 0.506287  |                |
| 6                                              | 1.138891  | -2.634491 | -0.195993 |                |
| 6                                              | 4.693723  | 1.717359  | 0.177387  |                |
| 12                                             | -3.581247 | -0.116168 | 0.150570  |                |
| 6                                              | 3.475228  | 2.351138  | 0.174551  |                |
| 6                                              | -1.873478 | -0.563828 | -0.519914 |                |
| 6                                              | -0.060949 | -2.273768 | -0.540664 |                |
| 6                                              | 2.364886  | -2.529944 | 0.086573  |                |
| 6                                              | 4.517665  | 0.327847  | 0.282379  |                |
| 6                                              | -1.152869 | -1.573437 | -0.571225 |                |
| 8                                              | -1.557345 | 0.863154  | -0.561066 |                |
| 12                                             | -3.240154 | 1.472558  | 0.076063  |                |
| 6                                              | 0.049974  | 2.125671  | -0.426006 |                |
| 6                                              | 1.614057  | 3.052586  | -0.055336 |                |
| 8                                              | -5.013589 | -0.689183 | 0.926256  |                |
| 6                                              | 4.169093  | -0.950700 | 0.141777  |                |
| 16                                             |           |           |           |                |
| 594.120027 Kcal/mol 25.763515 eV -100.436889 H |           |           |           | MutI_1_73.log  |
| 6                                              | -4.197046 | -0.049131 | -1.396353 |                |
| 6                                              | -3.213709 | -1.731013 | -0.480877 |                |
| 6                                              | -1.327705 | 1.157795  | 0.341143  |                |
| 6                                              | -0.490038 | 0.219080  | 1.024827  |                |
| 6                                              | -2.153701 | -0.920429 | 0.122536  |                |
| 8                                              | -2.352178 | 0.425342  | -0.246899 |                |
| 12                                             | 4.072767  | 1.755400  | -1.053670 |                |
| 6                                              | 0.991121  | -1.329316 | 1.554763  |                |
| 6                                              | 4.140005  | -2.454623 | -1.108902 |                |
| 6                                              | -4.322833 | -1.459802 | -1.232033 |                |
| 8                                              | -1.137886 | -1.109429 | 0.917184  |                |
| 6                                              | 1.002867  | -0.051198 | 1.550432  |                |
| 6                                              | 2.320178  | -1.729108 | 0.697212  |                |
| 6                                              | 2.643903  | 1.050411  | -0.380142 |                |
| 6                                              | 3.179951  | -2.242858 | -0.211861 |                |

|                                                |           |           |           |                |
|------------------------------------------------|-----------|-----------|-----------|----------------|
| 12                                             | -1.032554 | 3.470754  | 0.366440  |                |
| 16                                             |           |           |           |                |
| 595.754743 Kcal/mol 25.834403 eV -100.434284 H |           |           |           | MutD_4_66.log  |
| 8                                              | 0.328148  | -0.065540 | -1.166129 |                |
| 6                                              | -3.492012 | -3.244404 | -0.053107 |                |
| 6                                              | 8.329973  | -0.249294 | 1.578373  |                |
| 6                                              | -3.585875 | -0.029657 | 1.886935  |                |
| 12                                             | -0.181226 | 1.086110  | -1.831908 |                |
| 6                                              | 1.918856  | 0.007081  | -0.848867 |                |
| 6                                              | 5.596264  | -0.438021 | 0.215699  |                |
| 12                                             | -3.729895 | -1.845014 | 1.200317  |                |
| 6                                              | -2.867303 | 1.011474  | -1.069165 |                |
| 6                                              | -3.163915 | 0.520352  | 0.129232  |                |
| 8                                              | -2.849446 | 4.122094  | 0.267086  |                |
| 6                                              | 6.868423  | -0.579690 | 0.600355  |                |
| 6                                              | -3.466501 | -4.483097 | -0.679663 |                |
| 6                                              | 4.387384  | -0.294941 | -0.137975 |                |
| 6                                              | -2.450288 | 4.031446  | 1.344217  |                |
| 6                                              | 3.108966  | -0.142178 | -0.504129 |                |
| 16                                             |           |           |           |                |
| 596.558200 Kcal/mol 25.869245 eV -100.433004 H |           |           |           |                |
| Original3D_11_5.log                            |           |           |           |                |
| 6                                              | -0.838511 | -1.132378 | -0.630839 |                |
| 12                                             | -1.389825 | 0.959765  | -0.034657 |                |
| 6                                              | -3.919184 | 1.319610  | -0.679007 |                |
| 6                                              | 1.784685  | 0.188296  | -0.480775 |                |
| 6                                              | 0.150534  | 2.459920  | -1.096758 |                |
| 6                                              | -3.580617 | 0.046956  | -0.778850 |                |
| 8                                              | 2.660440  | -0.506949 | 1.518261  |                |
| 6                                              | -0.151758 | -2.190530 | -0.775264 |                |
| 6                                              | 1.314111  | -0.660658 | 0.834044  |                |
| 8                                              | -3.820261 | -0.960280 | 0.620391  |                |
| 6                                              | 1.125322  | -1.853664 | -0.283271 |                |
| 12                                             | 1.440227  | 2.213102  | 0.657648  |                |
| 6                                              | -3.359620 | -1.006870 | 1.575521  |                |
| 6                                              | 3.355969  | 0.247754  | 0.227894  |                |
| 6                                              | 2.169978  | -1.166620 | -1.049648 |                |
| 6                                              | 3.394714  | -0.641247 | -0.960565 |                |
| 16                                             |           |           |           |                |
| 596.965857 Kcal/mol 25.886922 eV -100.432354 H |           |           |           | Child_7_63.log |
| 6                                              | -1.213524 | 3.161407  | 0.299039  |                |
| 6                                              | 2.331227  | -3.471860 | 0.300836  |                |
| 6                                              | -1.850181 | 2.090245  | 0.293555  |                |
| 6                                              | 2.277007  | -2.485900 | -0.512217 |                |
| 12                                             | 0.685269  | 3.153255  | -0.093755 |                |
| 6                                              | 2.337486  | -1.364064 | -1.240292 |                |
| 8                                              | -2.454717 | 0.909210  | 0.286497  |                |
| 12                                             | 1.046801  | -1.817153 | 1.492671  |                |
| 6                                              | -1.736792 | -0.287707 | 0.601425  |                |
| 6                                              | 2.230221  | -0.149037 | -1.669087 |                |
| 6                                              | 1.799791  | 1.247546  | 0.288954  |                |
| 8                                              | -6.383548 | -2.170607 | -1.036209 |                |
| 6                                              | -2.111139 | -1.504343 | 0.027297  |                |
| 6                                              | 1.523939  | 1.272888  | -1.035105 |                |
| 6                                              | 3.355706  | 0.355286  | -0.049735 |                |

|            |           |           |           |                               |
|------------|-----------|-----------|-----------|-------------------------------|
| 6          | -0.623530 | 0.145198  | 0.897117  |                               |
| 16         |           |           |           |                               |
| 606.800897 | Kcal/mol  | 26.313411 | eV        | -100.416681 H Child_11_24.log |
| 8          | -6.645425 | -0.581263 | 0.610321  |                               |
| 6          | 4.975772  | -0.075936 | -0.585897 |                               |
| 6          | 1.745727  | -1.843860 | 0.882007  |                               |
| 6          | -0.812618 | 2.797752  | -0.524973 |                               |
| 6          | 1.980077  | -0.636168 | 1.179753  |                               |
| 6          | -2.121715 | 2.851685  | -0.440509 |                               |
| 6          | -5.529247 | -0.439936 | 0.197586  |                               |
| 6          | -0.176539 | 1.727404  | -0.479064 |                               |
| 6          | 2.159063  | 0.715777  | 1.467962  |                               |
| 12         | 2.792720  | 0.124541  | -0.419987 |                               |
| 6          | 1.439739  | 1.768785  | 1.017601  |                               |
| 8          | 0.876152  | 1.025710  | -0.433144 |                               |
| 6          | -4.258364 | -0.164822 | -0.246180 |                               |
| 6          | -1.760887 | -2.605337 | -1.220313 |                               |
| 12         | 0.006180  | -1.867882 | -0.222975 |                               |
| 6          | 4.453556  | -1.201258 | -0.198283 |                               |
| 16         |           |           |           |                               |
| 613.188654 | Kcal/mol  | 26.590410 | eV        | -100.406502 H Child_10_54.log |
| 12         | -5.275101 | 0.375535  | 0.009429  |                               |
| 6          | 4.433941  | -0.083369 | -0.211456 |                               |
| 8          | -3.343157 | 0.128738  | -0.426421 |                               |
| 12         | 2.958496  | -1.772093 | -0.340517 |                               |
| 6          | -2.048768 | 0.072108  | -0.031807 |                               |
| 6          | -1.212975 | 1.158904  | -0.207754 |                               |
| 6          | 0.895993  | -2.570665 | -0.482031 |                               |
| 6          | -0.091473 | 1.775568  | -0.219343 |                               |
| 8          | 1.005683  | 0.058680  | 1.632611  |                               |
| 6          | 0.251130  | -0.667294 | 0.802024  |                               |
| 6          | 1.128600  | 2.103509  | -0.196655 |                               |
| 6          | -0.685231 | -2.456137 | -0.339843 |                               |
| 6          | 2.421061  | 2.347541  | -0.158279 |                               |
| 6          | 2.885742  | 3.428184  | -0.269718 |                               |
| 6          | 0.929921  | -1.487102 | 0.207313  |                               |
| 6          | -1.158100 | -1.078019 | 0.161471  |                               |
| 16         |           |           |           |                               |
| 614.818062 | Kcal/mol  | 26.661068 | eV        | -100.403905 H MutD_4_78.log   |
| 6          | 0.264067  | -2.719347 | -1.118179 |                               |
| 6          | 3.016521  | 1.298092  | 0.029205  |                               |
| 8          | 1.224664  | -0.535946 | 2.070477  |                               |
| 6          | -4.305262 | 0.200782  | -0.511340 |                               |
| 8          | 2.613870  | -1.695226 | -1.107797 |                               |
| 12         | -2.241716 | -0.922409 | -0.053939 |                               |
| 6          | -5.554583 | 2.375679  | -1.178973 |                               |
| 6          | 3.591599  | 2.783908  | -0.825390 |                               |
| 12         | 2.346420  | -0.464650 | 0.222677  |                               |
| 6          | -0.985653 | 0.440518  | 2.924366  |                               |
| 6          | 1.816989  | -2.353857 | -1.634304 |                               |
| 6          | 4.006253  | 4.041665  | -0.973513 |                               |
| 6          | -1.079496 | -1.639928 | -1.314080 |                               |
| 6          | -1.386247 | -0.205683 | 1.819247  |                               |
| 6          | -4.753004 | 1.649258  | -0.922344 |                               |
| 6          | 0.041362  | -0.122072 | 2.084254  |                               |

16  
615.930789 Kcal/mol 26.709321 eV -100.402132 H Child\_8\_47.log  
6 -1.897112 2.598043 -0.004014  
6 4.252316 -1.207305 -1.014940  
6 -2.972079 1.915260 -0.064621  
6 4.698796 -0.138026 -0.493638  
6 -5.539638 0.102935 -0.230635  
12 2.300890 -1.309178 -0.448543  
6 -3.856802 0.882012 -0.136452  
6 5.074451 1.010799 0.052874  
12 0.062518 1.816498 0.173361  
6 5.384592 2.136969 0.688726  
6 -3.365280 -0.498410 -0.138762  
6 0.794258 -2.556367 1.230029  
6 -2.295027 -1.276999 -0.191243  
6 1.112177 0.387247 0.198395  
8 0.010846 -2.208200 0.586453  
8 -4.598947 -1.069897 -0.095469

16  
616.062276 Kcal/mol 26.715022 eV -100.401922 H Child\_11\_52.log  
8 3.220213 1.997019 -0.100906  
6 -2.514717 -3.058439 -0.272431  
12 5.773947 -1.136791 -0.200227  
6 -3.290786 -2.058253 -0.155933  
6 -0.975346 4.128125 -0.179998  
6 -3.898237 -0.825867 -0.037897  
6 3.889432 -0.285084 0.326074  
6 -4.845817 0.157812 0.084627  
6 3.026513 0.793041 -0.023275  
6 -3.476331 0.596162 0.068183  
6 -1.697905 3.133885 -0.058804  
12 -0.958167 -1.698709 -0.019061  
6 1.578892 0.194219 0.114512  
8 -2.446743 1.266382 0.091934  
6 0.246382 -0.207222 0.097501  
6 1.295066 -1.248581 0.487981

16  
618.223662 Kcal/mol 26.808749 eV -100.398478 H MutD\_9\_70.log  
6 4.745981 7.058253 4.797890  
6 -1.500558 -2.265769 2.015070  
6 2.639822 -0.910840 -1.222880  
6 -2.267922 -1.578697 2.520273  
6 4.047541 0.060234 -1.980126  
6 1.044996 -3.306740 1.440757  
6 -3.241881 -0.732857 1.517926  
8 5.136877 -0.366654 -1.681809  
8 -2.846659 2.547546 -1.907251  
6 -3.601527 0.319195 0.823777  
6 0.463362 0.083548 -2.205293  
6 -0.197559 -2.914234 1.929481  
6 -3.297513 1.974946 -0.908450  
12 -1.249842 1.472719 -2.193596  
12 2.104220 -2.405003 0.210097  
6 -3.597122 1.169674 0.023986

621.763157 Kcal/mol 26.962236 eV -100.392837 H Child\_10\_24.log  
6 4.304079 -0.569022 0.175389  
12 -5.928861 -1.682778 0.169878  
12 3.582369 1.343924 0.175679  
6 -4.026814 -1.037552 -0.091402  
6 4.019028 -1.765666 0.046177  
6 -3.138020 -0.117217 -0.202767  
8 3.527407 -2.996357 -0.156056  
6 -1.777292 0.411621 -0.045882  
6 2.048487 2.908860 -0.152425  
6 2.175809 -3.073863 -0.128039  
6 -0.776998 0.282206 0.007508  
6 0.905726 -2.936117 0.013048  
6 -0.109273 4.734900 0.011994  
6 0.885898 3.649583 -0.096621  
6 0.533422 -0.135020 0.013677  
8 -3.790708 1.740103 -0.025270

16

624.417196 Kcal/mol 27.077327 eV -100.388608 H Child\_17\_11.log  
6 -4.700578 1.657154 -1.734270  
6 2.075991 -3.018956 -1.708388  
6 -2.682622 -0.952477 1.789928  
6 2.625749 -1.912209 -0.908193  
6 -3.547461 1.573043 -1.097702  
12 3.812521 -0.257427 -0.525611  
6 -2.954832 -0.176057 0.841810  
6 1.400128 -2.426983 -0.588808  
6 -2.222566 2.446847 -0.945468  
6 3.919992 1.694659 -0.018473  
6 -2.772558 0.644899 -0.264590  
6 0.250928 -2.290015 0.291966  
8 3.083000 6.663731 1.114503  
8 -0.237318 -3.266267 0.902133  
6 -1.546363 1.223493 -0.640761  
12 -0.632546 -1.239248 1.672661

16

626.216241 Kcal/mol 27.155341 eV -100.385741 H Child\_3\_47.log  
12 -0.082527 1.408728 1.700828  
6 -2.665169 -1.628039 -0.913094  
6 0.105895 2.457669 -0.667936  
12 -0.995256 -2.563952 -0.283072  
6 1.242908 2.137309 -0.985858  
6 -1.205755 2.305881 -0.159578  
6 -3.073690 -0.810663 -0.168068  
6 2.050392 1.069142 -0.999014  
8 0.793837 -2.204111 0.177701  
6 1.447937 0.534636 0.911023  
6 -3.240365 0.392357 0.600680  
6 2.387296 -0.130897 -0.654995  
6 0.947700 -0.689490 0.203667  
6 -0.655988 -0.844961 0.966921  
6 -2.386974 1.843086 -1.132443  
8 4.607197 -1.040077 -0.055313

16

628.489393 Kcal/mol 27.253914 eV -100.382118 H Child\_1\_33.log



|            |           |           |           |                               |
|------------|-----------|-----------|-----------|-------------------------------|
| 6          | -3.266028 | -2.600181 | -0.089298 |                               |
| 12         | 5.458038  | 0.821078  | 0.737435  |                               |
| 6          | -0.670209 | -2.635299 | -0.464944 |                               |
| 6          | -1.023629 | 2.017669  | 2.111424  |                               |
| 8          | -1.816241 | -2.415878 | -0.887783 |                               |
| 6          | -2.727086 | 4.648740  | -1.080140 |                               |
| 6          | 0.606056  | -2.427035 | -0.491891 |                               |
| 6          | -2.251451 | 3.482757  | -0.743659 |                               |
| 6          | -2.998637 | -1.171992 | 0.211968  |                               |
| 6          | -1.225231 | 1.762415  | 0.834977  |                               |
| 12         | 2.488758  | -1.535552 | -0.533994 |                               |
| 6          | -1.700474 | 2.307662  | -0.391214 |                               |
| 6          | 3.756502  | 0.232006  | -0.536896 |                               |
| 6          | 2.799314  | 0.774480  | -0.520319 |                               |
| 6          | -1.133854 | 0.882288  | -0.348390 |                               |
| 8          | -2.727909 | -1.967544 | 1.713908  |                               |
| 16         |           |           |           |                               |
| 631.442636 | Kcal/mol  | 27.381979 | eV        | -100.377412 H Child_9_32.log  |
| 6          | 2.013538  | 2.954031  | -0.277308 |                               |
| 6          | -5.046448 | -0.254159 | 0.748146  |                               |
| 6          | 2.543499  | 1.723620  | -0.136938 |                               |
| 6          | -4.346594 | -1.321956 | 0.292264  |                               |
| 6          | 3.069964  | 0.520361  | -0.132386 |                               |
| 6          | -3.537020 | -2.143492 | -0.291649 |                               |
| 6          | 3.887349  | -2.599118 | 0.709689  |                               |
| 8          | -4.786917 | 0.949234  | 0.585125  |                               |
| 6          | 2.261458  | -0.700656 | -0.142527 |                               |
| 12         | -2.313475 | -0.215853 | -0.623693 |                               |
| 6          | 1.420666  | 2.609722  | 0.885381  |                               |
| 8          | -3.426201 | 1.331362  | -0.312251 |                               |
| 6          | 2.727131  | -1.966258 | 0.276237  |                               |
| 6          | 0.893090  | -0.653008 | -0.455930 |                               |
| 6          | -0.299418 | -0.456185 | -0.691933 |                               |
| 12         | 4.995280  | -0.160996 | 0.050253  |                               |
| 16         |           |           |           |                               |
| 631.708354 | Kcal/mol  | 27.393501 | eV        | -100.376988 H MutD_17_68.log  |
| 6          | -1.785224 | 0.156081  | 0.179837  |                               |
| 6          | -4.307830 | 1.761875  | -0.403269 |                               |
| 8          | -3.714325 | -2.480735 | -0.281046 |                               |
| 6          | 0.783796  | -1.890069 | 0.647300  |                               |
| 6          | -1.170814 | -2.036885 | -0.257149 |                               |
| 6          | -2.478394 | -1.438239 | -0.158922 |                               |
| 6          | 2.425710  | -2.130574 | 1.017042  |                               |
| 6          | 1.547288  | 1.224978  | -1.231952 |                               |
| 6          | -0.375053 | 2.491140  | 0.869624  |                               |
| 6          | 2.818262  | 1.035705  | -1.083632 |                               |
| 12         | -0.436010 | 0.956887  | -0.910760 |                               |
| 12         | 3.922873  | -0.898110 | 0.233005  |                               |
| 6          | 4.127546  | 0.941903  | -0.849255 |                               |
| 8          | -0.184242 | 3.189783  | 1.753445  |                               |
| 6          | -0.139267 | -2.147101 | 0.732438  |                               |
| 6          | -3.221656 | 0.968234  | -0.069751 |                               |
| 16         |           |           |           |                               |
| 635.676919 | Kcal/mol  | 27.565595 | eV        | -100.370664 H Child_11_13.log |
| 6          | 5.434960  | -0.467462 | -0.008604 |                               |

|                                                |           |           |           |  |
|------------------------------------------------|-----------|-----------|-----------|--|
| 6                                              | -4.431660 | 2.225840  | -0.732377 |  |
| 6                                              | 4.722308  | 0.589243  | -0.011619 |  |
| 6                                              | -3.667503 | 1.205689  | -0.534298 |  |
| 12                                             | 3.918493  | -1.781209 | -0.179108 |  |
| 8                                              | -4.204112 | -1.785082 | 0.008559  |  |
| 6                                              | 3.806183  | 1.491925  | -0.028112 |  |
| 6                                              | -2.916384 | 0.306781  | 0.071182  |  |
| 6                                              | 2.642883  | 2.063428  | -0.045927 |  |
| 6                                              | -3.436436 | -0.921937 | 0.023282  |  |
| 6                                              | 1.234716  | -1.653200 | -0.203638 |  |
| 12                                             | -1.279776 | 1.479185  | 0.757983  |  |
| 6                                              | 1.376068  | 2.351392  | -0.060525 |  |
| 6                                              | -1.059964 | -2.147559 | 0.081376  |  |
| 6                                              | -0.084495 | -0.075504 | -0.034866 |  |
| 8                                              | -2.469473 | -1.488359 | 0.236222  |  |
| 16                                             |           |           |           |  |
| 637.728110 Kcal/mol 27.654543 eV -100.367395 H |           |           |           |  |
| Original3D_6_5.log                             |           |           |           |  |
| 6                                              | 0.073857  | 1.078604  | 1.125668  |  |
| 6                                              | 0.700528  | 0.780078  | -0.234067 |  |
| 6                                              | 2.220911  | -0.304715 | -1.159156 |  |
| 6                                              | -0.738263 | 1.695558  | -0.907061 |  |
| 8                                              | 0.864269  | -0.429331 | -1.504264 |  |
| 6                                              | 0.784530  | -1.632680 | 1.135251  |  |
| 6                                              | -2.008596 | 0.695689  | -0.848576 |  |
| 8                                              | -0.857239 | 2.802701  | -0.906251 |  |
| 6                                              | -2.038350 | 0.657959  | 0.621332  |  |
| 6                                              | 2.166118  | 0.668880  | -0.129320 |  |
| 6                                              | -1.157238 | 0.116625  | 1.662613  |  |
| 6                                              | -0.209733 | 1.667387  | 2.283752  |  |
| 12                                             | -0.699149 | -0.897570 | -0.144501 |  |
| 12                                             | 3.685557  | -0.995729 | 0.292891  |  |
| 6                                              | -2.659095 | -1.801331 | -0.648440 |  |
| 6                                              | -3.116858 | -2.999948 | 0.015248  |  |
| 16                                             |           |           |           |  |
| 639.781207 Kcal/mol 27.743574 eV -100.364124 H |           |           |           |  |
| Child_3_54.log                                 |           |           |           |  |
| 6                                              | 2.818737  | 4.063894  | -0.394825 |  |
| 6                                              | 0.179456  | -3.394468 | 0.023441  |  |
| 6                                              | 1.819263  | 3.349396  | -0.160648 |  |
| 6                                              | 1.470424  | -3.384195 | 0.034556  |  |
| 6                                              | 0.854079  | 2.661865  | 0.122519  |  |
| 6                                              | 2.774898  | -2.995900 | 0.042199  |  |
| 6                                              | -0.055478 | 1.918740  | 0.445576  |  |
| 6                                              | -0.517719 | -2.267761 | 0.011368  |  |
| 12                                             | -3.672230 | 1.626193  | -0.302608 |  |
| 12                                             | -2.804997 | -2.051606 | -0.103411 |  |
| 8                                              | 4.286420  | 0.444826  | 0.254716  |  |
| 6                                              | -0.160458 | -0.907507 | 0.054590  |  |
| 6                                              | -1.929963 | 1.403733  | 0.936453  |  |
| 6                                              | -1.661489 | -0.269529 | 0.031226  |  |
| 6                                              | 3.208157  | -1.573632 | -0.461414 |  |
| 8                                              | -1.170509 | 1.239817  | -0.159468 |  |
| 16                                             |           |           |           |  |
| 640.658514 Kcal/mol 27.781618 eV -100.362725 H |           |           |           |  |
| Child_7_16.log                                 |           |           |           |  |
| 6                                              | -5.349818 | -0.046142 | -1.270515 |  |

|                                                               |           |           |           |
|---------------------------------------------------------------|-----------|-----------|-----------|
| 6                                                             | 13.804906 | -0.876501 | -0.785206 |
| 12                                                            | -4.394534 | -1.796114 | -0.908093 |
| 8                                                             | 12.864966 | -1.008557 | -0.470997 |
| 6                                                             | -4.359267 | 0.703058  | -1.111011 |
| 6                                                             | 1.734925  | 3.197211  | 1.236811  |
| 6                                                             | -3.222655 | 1.385530  | -0.863760 |
| 6                                                             | 1.105113  | 3.825930  | 0.309638  |
| 8                                                             | -1.848636 | -2.247665 | -0.316642 |
| 6                                                             | -1.056450 | -1.244784 | 2.419495  |
| 6                                                             | -2.105275 | 1.748777  | -0.530100 |
| 12                                                            | -0.351566 | 2.443433  | -0.040234 |
| 6                                                             | -0.897327 | -1.561479 | 0.418037  |
| 6                                                             | -2.051628 | -1.139007 | 1.478182  |
| 6                                                             | 0.125801  | -0.880588 | 0.943021  |
| 6                                                             | -2.924565 | -2.065015 | 0.702248  |
| 16                                                            |           |           |           |
| 645.638448 Kcal/mol 27.997568 eV -100.354789 H Child_9_56.log |           |           |           |
| 6                                                             | 3.181765  | -3.493999 | 0.540870  |
| 6                                                             | 0.100954  | 2.861869  | 0.014734  |
| 6                                                             | 3.024922  | -2.238317 | 0.184547  |
| 6                                                             | -1.089586 | 2.443840  | -0.030340 |
| 6                                                             | 2.834469  | -0.971256 | -0.140335 |
| 6                                                             | 1.424673  | 3.143912  | 0.099212  |
| 12                                                            | 4.235345  | 0.424894  | -0.443451 |
| 8                                                             | -4.403958 | 0.994193  | 0.682238  |
| 8                                                             | -0.951251 | -1.189859 | -0.178746 |
| 6                                                             | -3.533018 | 1.218578  | -0.275119 |
| 12                                                            | 0.779346  | -0.479439 | -0.057645 |
| 6                                                             | -4.639324 | -1.879853 | -0.233548 |
| 6                                                             | -3.890213 | -0.159819 | -0.246765 |
| 6                                                             | -3.316997 | -1.470701 | -0.119046 |
| 6                                                             | 5.096944  | 1.671794  | 0.456249  |
| 6                                                             | -2.083690 | -0.756070 | 0.080413  |
| 16                                                            |           |           |           |
| 649.241798 Kcal/mol 28.153824 eV -100.349047 H                |           |           |           |
| Original3D_13_7.log                                           |           |           |           |
| 6                                                             | 1.558972  | 0.226003  | 0.880241  |
| 6                                                             | 1.741659  | -0.604545 | -1.876819 |
| 12                                                            | -0.487308 | 0.428781  | 0.240646  |
| 6                                                             | -2.543375 | 2.317119  | -0.510458 |
| 8                                                             | -1.976132 | 3.019850  | 0.633201  |
| 6                                                             | 1.773665  | 0.831210  | -1.193956 |
| 6                                                             | 1.716783  | -1.859845 | -2.051176 |
| 6                                                             | -2.786658 | 1.898706  | 0.823306  |
| 6                                                             | 1.542152  | -0.484118 | 2.005117  |
| 6                                                             | 1.055444  | 2.901199  | 0.077870  |
| 6                                                             | -2.952762 | -1.871983 | -0.748264 |
| 6                                                             | 1.468041  | 2.091515  | -1.386592 |
| 12                                                            | 2.844027  | -1.176477 | -0.165691 |
| 6                                                             | -4.010340 | -2.448907 | -0.283191 |
| 6                                                             | -4.482006 | -3.240219 | 0.342768  |
| 8                                                             | 2.879872  | -1.715406 | 2.195231  |
| 16                                                            |           |           |           |
| 652.788316 Kcal/mol 28.307616 eV -100.343395 H Child_6_63.log |           |           |           |
| 6                                                             | -1.888389 | 2.654839  | 1.491366  |

|            |                     |           |           |                              |
|------------|---------------------|-----------|-----------|------------------------------|
| 6          | -4.496980           | -0.980407 | -0.457350 |                              |
| 8          | 3.724282            | 0.543940  | -0.129649 |                              |
| 6          | -3.444697           | -1.692722 | -0.278295 |                              |
| 12         | 2.541268            | 1.711147  | -0.771613 |                              |
| 8          | -2.256104           | -2.329743 | -0.116501 |                              |
| 12         | 3.355549            | -0.705518 | 0.859462  |                              |
| 6          | -1.152024           | -1.610577 | -0.055368 |                              |
| 6          | -2.830480           | 2.160048  | 0.781516  |                              |
| 6          | 0.554216            | 1.590475  | -1.042834 |                              |
| 6          | -1.262283           | -0.242171 | -0.169138 |                              |
| 6          | -0.380042           | 0.643729  | -0.927154 |                              |
| 6          | 1.493175            | -1.973715 | 0.704665  |                              |
| 6          | 0.297278            | 0.153116  | 0.353742  |                              |
| 6          | -3.793347           | 1.674569  | -0.005033 |                              |
| 6          | 3.152370            | -2.007372 | -0.243611 |                              |
| 16         |                     |           |           |                              |
| 663.286047 | Kcal/mol            | 28.762842 | eV        | -100.326666 H Child_5_13.log |
| 6          | 2.540070            | 3.610486  | -1.061317 |                              |
| 6          | -1.110106           | 0.612330  | 1.386777  |                              |
| 6          | 3.354096            | 0.126216  | -0.935218 |                              |
| 6          | 0.102679            | -0.110927 | 1.270939  |                              |
| 8          | 2.694454            | 4.387511  | -0.189700 |                              |
| 6          | -1.033992           | -0.802265 | 0.707814  |                              |
| 12         | 3.356333            | -2.014685 | -0.746382 |                              |
| 6          | -3.640153           | 2.331828  | 0.504272  |                              |
| 6          | 2.855477            | 0.662255  | 0.135140  |                              |
| 6          | -1.058248           | -2.191015 | 0.015671  |                              |
| 6          | 2.341319            | 1.263749  | 1.231604  |                              |
| 6          | 0.122091            | -2.747577 | -0.033922 |                              |
| 6          | 3.205221            | -3.734151 | 0.522447  |                              |
| 8          | -3.835518           | 1.401567  | -0.114423 |                              |
| 6          | -7.157626           | -0.250938 | -1.097335 |                              |
| 12         | -2.856039           | -1.229697 | -0.374306 |                              |
| 16         |                     |           |           |                              |
| 663.358106 | Kcal/mol            | 28.765966 | eV        | -100.326551 H                |
|            | Original3D_0_39.log |           |           |                              |
| 6          | 1.053331            | -1.138880 | -0.993086 |                              |
| 6          | -1.539967           | 0.198318  | 0.040484  |                              |
| 6          | 0.160353            | -2.022153 | 0.470508  |                              |
| 8          | 1.167822            | 1.750281  | -0.783592 |                              |
| 6          | 1.566364            | 2.802606  | -0.605033 |                              |
| 6          | 3.435937            | 0.686986  | -1.026199 |                              |
| 8          | 3.111553            | 0.463043  | -2.075130 |                              |
| 6          | -0.896846           | -1.033671 | 0.440091  |                              |
| 6          | -2.012191           | -2.139042 | -0.026870 |                              |
| 12         | -3.910198           | -1.080276 | -0.398890 |                              |
| 6          | 5.018320            | 0.167691  | 1.479496  |                              |
| 6          | 1.384622            | -1.839636 | -0.163298 |                              |
| 12         | -3.574209           | 1.503254  | 0.715602  |                              |
| 6          | -1.116302           | -3.110973 | 0.266799  |                              |
| 6          | 5.769649            | -0.143429 | 2.412030  |                              |
| 6          | -3.560289           | 3.775127  | 0.883282  |                              |
| 16         |                     |           |           |                              |
| 665.944793 | Kcal/mol            | 28.878136 | eV        | -100.322429 H Child_1_9.log  |
| 6          | 3.776304            | -2.431423 | -1.197405 |                              |

|            |            |           |           |                               |
|------------|------------|-----------|-----------|-------------------------------|
| 6          | -8.228587  | -0.584184 | -0.729925 |                               |
| 6          | 3.603516   | -3.009279 | -0.023256 |                               |
| 8          | -7.028187  | -0.401248 | -0.463242 |                               |
| 6          | 3.479571   | -1.260630 | -0.664868 |                               |
| 6          | -5.774680  | -0.210219 | -0.184762 |                               |
| 6          | 3.355627   | 0.488018  | -1.306481 |                               |
| 12         | -3.826153  | 0.086727  | 0.248126  |                               |
| 6          | 3.306783   | -1.838487 | 0.509281  |                               |
| 12         | -1.118011  | 0.499436  | 0.849770  |                               |
| 6          | 3.182839   | -0.089838 | -0.132331 |                               |
| 6          | 0.862283   | 0.801223  | 1.289714  |                               |
| 6          | 3.010051   | -0.667695 | 1.041818  |                               |
| 6          | 2.067705   | 0.984924  | 1.557512  |                               |
| 6          | 2.934950   | 3.407459  | -1.415556 |                               |
| 8          | 2.762162   | 2.829602  | -0.241407 |                               |
| 16         |            |           |           |                               |
| 668.100624 | Kcal/mol   | 28.971622 | eV        | -100.318994 H Child_10_60.log |
| 8          | 4.634155   | 0.507300  | -0.867025 |                               |
| 6          | -4.876385  | -0.897117 | -0.151943 |                               |
| 6          | 3.705001   | -0.036324 | -0.389484 |                               |
| 6          | -3.790767  | -1.629897 | -0.443071 |                               |
| 6          | 2.644145   | -2.616531 | 0.459198  |                               |
| 12         | -3.018120  | 0.427150  | -0.040055 |                               |
| 6          | 2.663455   | -0.613213 | 0.284341  |                               |
| 6          | -2.406209  | 2.591227  | -0.223126 |                               |
| 6          | 1.662707   | -1.974611 | -0.202868 |                               |
| 6          | -2.474582  | -1.886807 | -0.425425 |                               |
| 8          | 1.302258   | 3.095118  | -0.464147 |                               |
| 6          | -1.015888  | 0.983115  | 1.091061  |                               |
| 6          | 2.325967   | 0.216797  | 1.300432  |                               |
| 6          | -0.940108  | 1.925402  | 0.093856  |                               |
| 6          | 0.392376   | -1.606892 | -0.583671 |                               |
| 12         | 0.115656   | -0.056335 | 0.522854  |                               |
| 16         |            |           |           |                               |
| 672.436668 | Kcal/mol   | 29.159651 | eV        | -100.312084 H Child_9_35.log  |
| 6          | -14.055529 | -0.801280 | -0.741210 |                               |
| 6          | 2.307512   | 8.560110  | 0.275900  |                               |
| 8          | -0.955200  | -2.298693 | 2.783829  |                               |
| 6          | 2.046951   | 7.261924  | 0.117735  |                               |
| 6          | -12.755025 | -0.597369 | -1.006050 |                               |
| 12         | 1.550002   | 4.793334  | -0.185360 |                               |
| 6          | -1.357473  | -1.392632 | 2.331218  |                               |
| 6          | 1.266109   | 3.373693  | -0.359389 |                               |
| 6          | 0.528041   | -2.948831 | 1.062350  |                               |
| 6          | 1.017204   | 2.138830  | -0.510267 |                               |
| 6          | 1.529145   | -3.425882 | 0.565888  |                               |
| 6          | 0.759729   | 0.847235  | -0.663120 |                               |
| 12         | 2.929318   | -4.126699 | -0.047989 |                               |
| 6          | 0.503471   | -0.417418 | -0.826888 |                               |
| 8          | 4.202380   | -4.585457 | -1.134952 |                               |
| 6          | 4.921650   | -4.752785 | -1.977972 |                               |
| 16         |            |           |           |                               |
| 672.954659 | Kcal/mol   | 29.182113 | eV        | -100.311258 H Child_6_37.log  |
| 6          | -1.942203  | -2.458688 | -1.197894 |                               |
| 6          | -0.304600  | 2.265085  | -0.197036 |                               |

|    |           |           |           |
|----|-----------|-----------|-----------|
| 6  | -0.766457 | -2.134984 | -1.484709 |
| 6  | 2.141380  | 2.238982  | -0.533360 |
| 6  | -2.626493 | -2.275698 | -0.034861 |
| 6  | -2.857023 | 1.824430  | -0.340403 |
| 6  | 0.325396  | -1.549215 | -0.940037 |
| 8  | 3.152359  | 1.705556  | -0.421322 |
| 6  | -2.874751 | -1.914931 | 1.171054  |
| 6  | -1.669891 | 1.914472  | -0.478553 |
| 6  | 0.973478  | -1.098746 | 0.064162  |
| 6  | -4.041187 | 1.396323  | 0.021311  |
| 12 | 7.901458  | -0.838728 | 0.361864  |
| 6  | -5.065500 | 0.574993  | 0.440987  |
| 12 | -0.994820 | -0.761108 | 1.321295  |
| 8  | 0.518572  | 1.607682  | 0.528588  |

16

673.623930 Kcal/mol 29.211135 eV -100.310192 H

Original3D\_11\_7.log

|    |           |           |           |
|----|-----------|-----------|-----------|
| 6  | -1.205890 | 0.945245  | 0.576799  |
| 6  | -0.716588 | -1.078490 | 0.907529  |
| 6  | 0.878560  | -0.874568 | 1.118322  |
| 6  | 2.217583  | -0.903178 | 0.687618  |
| 6  | -0.986255 | -0.151913 | -0.453807 |
| 8  | 3.326392  | -0.917992 | 0.676520  |
| 12 | -2.624289 | 2.624698  | 0.430102  |
| 6  | -3.079644 | -1.194011 | -0.911100 |
| 6  | 4.838487  | 0.038778  | -0.767028 |
| 6  | 5.782310  | 0.690893  | -1.068581 |
| 6  | -4.056914 | 4.362663  | -0.531767 |
| 6  | 6.908291  | 0.833012  | -0.582313 |
| 6  | 0.936957  | -0.222643 | 2.323567  |
| 12 | -4.037099 | -3.050991 | -0.533100 |
| 6  | -2.850861 | -0.184298 | -0.148390 |
| 8  | 0.166163  | -0.138685 | -1.385159 |

16

674.451294 Kcal/mol 29.247013 eV -100.308873 H

Child\_11\_17.log

|    |           |           |           |
|----|-----------|-----------|-----------|
| 12 | 5.719740  | -0.773879 | 0.752479  |
| 6  | -4.181469 | 0.812051  | 0.149672  |
| 6  | 3.845147  | -0.616833 | 0.122984  |
| 6  | -3.264655 | -1.700138 | -0.239160 |
| 6  | 2.260356  | 2.099782  | -0.976826 |
| 6  | -3.528452 | -0.409266 | 0.189259  |
| 6  | 1.587199  | 2.976923  | -0.163212 |
| 6  | -2.579867 | -2.745833 | -0.445286 |
| 6  | 2.693226  | -0.857836 | -0.266519 |
| 6  | -2.787197 | 1.293793  | 0.333129  |
| 6  | 0.377100  | 3.418687  | -0.086602 |
| 8  | -1.961657 | 1.944253  | -0.075713 |
| 6  | 1.462932  | -1.133251 | -0.776210 |
| 12 | -1.010694 | -1.308561 | 0.256512  |
| 6  | 0.373909  | -1.422730 | -1.333526 |
| 8  | -2.295585 | -0.107104 | 1.181450  |

16

677.384894 Kcal/mol 29.374226 eV -100.304198 H

Child\_5\_26.log

|    |           |           |           |
|----|-----------|-----------|-----------|
| 6  | 7.306605  | -1.870273 | -0.258149 |
| 12 | -0.983060 | 2.399209  | -0.050425 |

|            |           |           |           |                               |
|------------|-----------|-----------|-----------|-------------------------------|
| 6          | -0.748870 | -1.205000 | 1.367810  |                               |
| 6          | -6.321952 | 0.934645  | 0.077599  |                               |
| 6          | 6.221798  | -1.127136 | -0.257612 |                               |
| 6          | -5.054370 | 0.774208  | -0.093832 |                               |
| 6          | 5.081234  | -0.548058 | -0.158738 |                               |
| 6          | -3.771216 | 0.685450  | -0.308222 |                               |
| 6          | -1.879615 | -1.226457 | 0.741548  |                               |
| 6          | -2.487337 | 0.757250  | -0.398091 |                               |
| 6          | 3.887840  | -0.024928 | 0.038376  |                               |
| 8          | 4.707619  | 2.966873  | 0.244231  |                               |
| 12         | -3.617386 | -2.392426 | -0.194417 |                               |
| 6          | -0.035197 | 0.523667  | -0.360816 |                               |
| 6          | 2.672232  | 0.253615  | 0.253378  |                               |
| 8          | -1.460312 | -1.422285 | -0.359405 |                               |
| 16         |           |           |           |                               |
| 680.386737 | Kcal/mol  | 29.504399 | eV        | -100.299414 H Child_17_10.log |
| 8          | -5.718707 | -2.387716 | -0.517914 |                               |
| 6          | 8.632897  | -4.744565 | 0.017098  |                               |
| 12         | -6.665705 | -4.051922 | 0.287793  |                               |
| 6          | 7.702311  | -3.773629 | 0.010075  |                               |
| 6          | -4.768412 | -1.602356 | -0.491439 |                               |
| 12         | 5.977174  | -1.973691 | -0.002946 |                               |
| 6          | -3.857648 | -0.735654 | -0.124792 |                               |
| 6          | -2.956431 | 0.231997  | 0.143209  |                               |
| 6          | 3.040248  | 1.090580  | -0.025113 |                               |
| 6          | -2.218139 | 1.247030  | 0.208518  |                               |
| 6          | 2.229297  | 1.936692  | -0.031234 |                               |
| 6          | 1.320023  | 2.885392  | -0.038097 |                               |
| 6          | -1.566573 | 2.245825  | 0.864423  |                               |
| 6          | 0.464720  | 3.777781  | -0.044552 |                               |
| 6          | 2.631390  | 5.268923  | -0.290691 |                               |
| 8          | -1.238760 | 5.555123  | -0.057409 |                               |
| 16         |           |           |           |                               |
| 681.756886 | Kcal/mol  | 29.563814 | eV        | -100.297231 H Child_17_30.log |
| 6          | 5.826079  | -0.885394 | -0.220469 |                               |
| 6          | -9.416354 | 0.142363  | -0.594340 |                               |
| 6          | 5.481934  | 0.345362  | -0.288389 |                               |
| 6          | -8.220700 | 0.038355  | -0.205859 |                               |
| 8          | 5.247324  | 1.736721  | -0.294692 |                               |
| 6          | -6.869857 | -0.157273 | -0.026604 |                               |
| 6          | 4.606177  | -2.005566 | -0.287470 |                               |
| 6          | -5.643792 | -0.141483 | 0.056729  |                               |
| 6          | 3.786339  | 1.664552  | -0.115264 |                               |
| 8          | -4.354860 | -0.133162 | 0.189975  |                               |
| 6          | 3.416142  | -2.432162 | -0.292373 |                               |
| 6          | -3.044123 | -0.135076 | 0.358661  |                               |
| 6          | 2.506788  | 1.648684  | -0.027006 |                               |
| 6          | -1.794991 | -0.014737 | 0.473791  |                               |
| 12         | 0.253171  | 0.337765  | 0.191085  |                               |
| 12         | 3.835032  | -0.440618 | 0.463022  |                               |
| 16         |           |           |           |                               |
| 694.448984 | Kcal/mol  | 30.114196 | eV        | -100.277005 H Child_1_50.log  |
| 12         | -3.342665 | 0.698924  | 0.334280  |                               |
| 6          | 2.869048  | 1.414917  | -0.640302 |                               |
| 6          | -3.927282 | 2.913382  | 0.920835  |                               |

|    |           |           |           |
|----|-----------|-----------|-----------|
| 6  | 1.874552  | 2.368407  | -0.601234 |
| 12 | -2.791416 | -2.070559 | -0.473123 |
| 6  | 0.921440  | 3.352697  | -0.517815 |
| 6  | -0.846236 | -2.956660 | -0.185915 |
| 6  | 2.692441  | -1.175427 | -0.093090 |
| 6  | 0.463786  | -2.991614 | -0.121576 |
| 6  | 0.267208  | -0.690816 | 0.067050  |
| 6  | 2.455371  | -0.223405 | -1.320562 |
| 6  | -0.360952 | 0.366124  | -0.038931 |
| 6  | 3.610035  | -1.100602 | 2.256126  |
| 6  | 1.145276  | -1.810277 | 0.197741  |
| 8  | 2.169790  | 1.350916  | 0.452100  |
| 8  | -1.342183 | 1.106492  | -0.185579 |

16

694.614015 Kcal/mol 30.121353 eV -100.276742 H

Original1D\_0\_7.log

|    |          |          |            |
|----|----------|----------|------------|
| 6  | 0.000000 | 0.000000 | 3.347143   |
| 6  | 0.000000 | 0.000000 | 2.027143   |
| 6  | 0.000000 | 0.000000 | 0.707143   |
| 6  | 0.000000 | 0.000000 | 4.667143   |
| 6  | 0.000000 | 0.000000 | -0.612857  |
| 6  | 0.000000 | 0.000000 | 5.987143   |
| 6  | 0.000000 | 0.000000 | 7.307143   |
| 6  | 0.000000 | 0.000000 | -1.932857  |
| 6  | 0.000000 | 0.000000 | -3.252857  |
| 6  | 0.000000 | 0.000000 | -4.572857  |
| 6  | 0.000000 | 0.000000 | -5.892857  |
| 8  | 0.000000 | 0.000000 | 8.627143   |
| 6  | 0.000000 | 0.000000 | -7.212857  |
| 12 | 0.000000 | 0.000000 | 9.947143   |
| 12 | 0.000000 | 0.000000 | -8.532857  |
| 8  | 0.000000 | 0.000000 | -11.172857 |

16

694.870898 Kcal/mol 30.132492 eV -100.276332 H

Original1D\_0\_6.log

|    |          |          |            |
|----|----------|----------|------------|
| 6  | 0.000000 | 0.000000 | -10.844980 |
| 6  | 0.000000 | 0.000000 | -9.532825  |
| 6  | 0.000000 | 0.000000 | -8.249155  |
| 6  | 0.000000 | 0.000000 | -6.945521  |
| 6  | 0.000000 | 0.000000 | -5.709261  |
| 12 | 0.000000 | 0.000000 | -3.684622  |
| 8  | 0.000000 | 0.000000 | -2.050899  |
| 6  | 0.000000 | 0.000000 | -0.800799  |
| 6  | 0.000000 | 0.000000 | 0.443383   |
| 6  | 0.000000 | 0.000000 | 1.736784   |
| 6  | 0.000000 | 0.000000 | 3.022419   |
| 6  | 0.000000 | 0.000000 | 4.278258   |
| 8  | 0.000000 | 0.000000 | 5.505809   |
| 12 | 0.000000 | 0.000000 | 7.465627   |
| 6  | 0.000000 | 0.000000 | 9.574470   |
| 6  | 0.000000 | 0.000000 | 10.858668  |

16

695.128750 Kcal/mol 30.143674 eV -100.275922 H

Original2D\_1\_2.log

|   |           |          |          |
|---|-----------|----------|----------|
| 8 | -0.171907 | 1.627213 | 0.000000 |
|---|-----------|----------|----------|



|            |                     |           |           |                               |
|------------|---------------------|-----------|-----------|-------------------------------|
| 6          | -1.301091           | 2.528061  | 0.000000  |                               |
| 6          | 0.804949            | 2.741591  | 0.000000  |                               |
| 12         | 1.910292            | 1.051150  | 0.000000  |                               |
| 6          | 2.449273            | -1.172020 | -0.000000 |                               |
| 6          | 3.327143            | -2.399463 | -0.000000 |                               |
| 6          | 3.987668            | 0.058687  | 0.000000  |                               |
| 6          | 1.391752            | -2.132016 | -0.000000 |                               |
| 6          | -2.390515           | 1.503815  | 0.000000  |                               |
| 6          | -1.065426           | -1.908800 | -0.000000 |                               |
| 6          | -1.898608           | -2.871260 | -0.000000 |                               |
| 12         | -3.406000           | 3.287706  | 0.000000  |                               |
| 6          | -0.000000           | -1.183591 | -0.000000 |                               |
| 6          | -2.606565           | 0.366911  | -0.000000 |                               |
| 8          | -2.675600           | -3.841640 | -0.000000 |                               |
| 6          | 4.089512            | -1.257056 | -0.000000 |                               |
| 16         |                     |           |           |                               |
| 701.329976 | Kcal/mol            | 30.412585 | eV        | -100.266039 H Child_8_17.log  |
| 8          | 5.385944            | -1.193230 | 0.396589  |                               |
| 12         | -5.619810           | 1.109902  | -0.051368 |                               |
| 6          | 5.745101            | -0.089566 | 0.973565  |                               |
| 6          | -3.534253           | 1.568155  | 0.161879  |                               |
| 12         | 3.089651            | 0.069380  | -0.605000 |                               |
| 6          | -4.330720           | -0.826088 | 0.071548  |                               |
| 6          | 0.980427            | -0.118323 | -0.758525 |                               |
| 6          | 5.063324            | 1.051776  | 0.535565  |                               |
| 6          | -3.507101           | 0.229378  | -0.090144 |                               |
| 6          | -0.157101           | 0.346394  | -0.474013 |                               |
| 6          | -2.149676           | 1.667925  | 0.322706  |                               |
| 6          | 3.950925            | 1.876495  | 0.285712  |                               |
| 6          | -4.343557           | -2.133866 | 0.284845  |                               |
| 6          | -1.267584           | 0.976856  | -0.028163 |                               |
| 6          | -4.368623           | -3.442036 | 0.437270  |                               |
| 8          | 4.348424            | -1.406019 | -0.703723 |                               |
| 16         |                     |           |           |                               |
| 703.134759 | Kcal/mol            | 30.490847 | eV        | -100.263163 H Child_15_22.log |
| 8          | 2.918351            | 2.929845  | 0.116616  |                               |
| 12         | -5.932636           | -0.047981 | 0.448192  |                               |
| 6          | 2.909533            | 1.680384  | 0.388385  |                               |
| 6          | -4.058208           | -0.156116 | -0.065167 |                               |
| 8          | 1.657227            | 3.344239  | -0.765383 |                               |
| 6          | -2.871740           | -0.269590 | -0.385223 |                               |
| 6          | 2.753674            | 0.486336  | 0.668210  |                               |
| 6          | -1.593753           | -0.567118 | -0.555925 |                               |
| 12         | 2.183095            | -1.407163 | 0.757859  |                               |
| 6          | -0.009432           | -2.092464 | -0.111624 |                               |
| 6          | 0.023222            | 3.060500  | -0.195419 |                               |
| 6          | 2.002858            | -3.642802 | -0.519772 |                               |
| 6          | -1.188098           | 2.889531  | 0.103358  |                               |
| 6          | -0.367003           | -0.760019 | -0.335186 |                               |
| 6          | 3.036044            | -2.973793 | -0.231218 |                               |
| 6          | 0.761213            | -3.110008 | -0.307498 |                               |
| 16         |                     |           |           |                               |
| 703.754644 | Kcal/mol            | 30.517728 | eV        | -100.262175 H                 |
|            | Original2D_0_29.log |           |           |                               |
| 12         | 1.423929            | 1.360256  | 0.000000  |                               |

|    |           |           |           |
|----|-----------|-----------|-----------|
| 12 | -0.979838 | 2.680925  | -0.000000 |
| 6  | -0.000000 | -0.836145 | 0.000000  |
| 8  | -2.056907 | -1.495114 | -0.000000 |
| 6  | -1.301808 | -0.088408 | -0.000000 |
| 6  | -0.698767 | -2.175576 | -0.000000 |
| 6  | 1.386033  | -1.616809 | 0.000000  |
| 6  | 0.574726  | -2.924906 | 0.000000  |
| 8  | -2.216565 | 0.906094  | -0.000000 |
| 6  | -0.194391 | -4.178628 | 0.000000  |
| 6  | -0.863487 | -5.161006 | 0.000000  |
| 6  | -2.632249 | -2.763211 | -0.000000 |
| 6  | 1.582690  | 4.216000  | 0.000000  |
| 6  | 1.843792  | -3.592183 | 0.000000  |
| 6  | 2.217593  | 5.349244  | 0.000000  |
| 6  | 2.895647  | 6.474623  | 0.000000  |

16

705.735378 Kcal/mol 30.603621 eV -100.259019 H

Original3D\_11\_4.log

|    |           |           |           |
|----|-----------|-----------|-----------|
| 6  | 1.663252  | 1.074737  | 0.039011  |
| 12 | 1.952199  | 3.262234  | 0.205213  |
| 12 | -0.267341 | 1.489488  | -0.983692 |
| 6  | 2.688218  | 0.601244  | -0.453202 |
| 6  | -2.362349 | -0.245214 | -0.554258 |
| 6  | -3.143942 | 0.924397  | -0.270429 |
| 6  | -3.541127 | 2.408636  | 0.710298  |
| 8  | -2.375988 | 1.781961  | 0.908353  |
| 6  | 2.812154  | -0.686646 | 0.125561  |
| 8  | -3.114190 | -2.638139 | -0.320737 |
| 6  | -2.270275 | -3.511750 | 1.332709  |
| 6  | -3.605592 | -1.585251 | -0.748643 |
| 6  | 3.892364  | -1.907399 | 0.121125  |
| 6  | 2.876367  | -1.093078 | 1.480604  |
| 6  | 3.097434  | -2.377824 | -0.931889 |
| 6  | 1.844019  | -1.963725 | -0.077414 |

16

706.311076 Kcal/mol 30.628586 eV -100.258101 H

MutI\_3\_75.log

|    |           |           |           |
|----|-----------|-----------|-----------|
| 6  | -3.904693 | -0.871522 | 0.858573  |
| 6  | 4.593016  | -1.792612 | -0.168355 |
| 6  | -1.827649 | 3.506328  | -0.229463 |
| 8  | 2.125041  | -1.904557 | 0.096170  |
| 6  | -0.442883 | 3.543834  | -0.170126 |
| 8  | -1.194753 | 2.397742  | 0.536453  |
| 6  | 2.151336  | 1.354345  | 0.750525  |
| 6  | -2.820606 | -1.510568 | 0.600345  |
| 6  | 1.565330  | 2.157770  | 0.062916  |
| 6  | 0.829229  | 3.767503  | -0.576715 |
| 6  | 3.307352  | -1.879105 | -0.030479 |
| 12 | -5.044764 | -1.931932 | -0.608492 |
| 12 | 0.962573  | -0.088559 | -0.310981 |
| 6  | -0.854225 | -1.329377 | -0.456497 |
| 6  | -1.534654 | -2.027101 | 0.437723  |
| 6  | 5.862445  | -1.536093 | -0.082998 |

16

706.468991 Kcal/mol 30.635434 eV -100.257850 H

MutI\_14\_57.log

|   |           |          |          |
|---|-----------|----------|----------|
| 8 | -1.476764 | 2.638555 | 0.207713 |
|---|-----------|----------|----------|

|            |                     |           |           |                               |
|------------|---------------------|-----------|-----------|-------------------------------|
| 6          | -4.450359           | -1.196285 | -0.620906 |                               |
| 6          | 0.929163            | -1.923825 | 0.434634  |                               |
| 12         | -1.871230           | 0.989144  | -0.324746 |                               |
| 6          | -3.422638           | 2.063339  | 1.465833  |                               |
| 8          | 2.053417            | -1.427351 | 0.190570  |                               |
| 12         | 5.465169            | -0.021829 | -0.234727 |                               |
| 6          | -2.888171           | -0.731383 | 0.240594  |                               |
| 6          | 2.008406            | 0.956413  | -0.262253 |                               |
| 6          | -5.684704           | -1.516874 | -1.145412 |                               |
| 6          | -0.263263           | -2.186966 | 0.608036  |                               |
| 6          | 0.883164            | 1.557136  | -0.370976 |                               |
| 6          | 4.066484            | -0.136170 | -0.088254 |                               |
| 6          | -0.339332           | 1.866922  | -0.286440 |                               |
| 6          | -1.613204           | -2.174615 | 0.717752  |                               |
| 6          | 2.817707            | -0.127260 | -0.104706 |                               |
| 16         |                     |           |           |                               |
| 710.547986 | Kcal/mol            | 30.812316 | eV        | -100.251349 H Child_14_25.log |
| 12         | 6.441027            | 1.388599  | 0.096493  |                               |
| 12         | -2.579595           | -2.572793 | -0.394217 |                               |
| 6          | 4.924615            | 0.385529  | 0.076693  |                               |
| 6          | -0.486928           | -3.058223 | -0.189288 |                               |
| 6          | 3.970815            | -0.314920 | 0.033170  |                               |
| 6          | -2.997073           | -0.473581 | -0.025336 |                               |
| 8          | -2.578378           | 2.997996  | 0.171277  |                               |
| 6          | 0.635531            | -2.510892 | 0.018458  |                               |
| 6          | -3.718849           | 2.568488  | 0.613811  |                               |
| 6          | -2.223118           | 0.752985  | -0.281511 |                               |
| 6          | -1.184470           | 3.036701  | -0.799480 |                               |
| 6          | 1.732412            | -1.732509 | 0.039701  |                               |
| 6          | 2.890989            | -1.141425 | -0.001515 |                               |
| 6          | -3.377280           | 1.047560  | 0.263631  |                               |
| 6          | -1.446806           | 1.761122  | -0.554029 |                               |
| 8          | -2.253649           | -1.462331 | 0.879580  |                               |
| 16         |                     |           |           |                               |
| 717.137854 | Kcal/mol            | 31.098080 | eV        | -100.240848 H                 |
|            | Original2D_12_1.log |           |           |                               |
| 6          | 0.000000            | -0.841756 | 0.000000  |                               |
| 12         | 0.710604            | 1.241956  | 0.000000  |                               |
| 6          | -2.111115           | 1.324967  | 0.000000  |                               |
| 6          | -2.489007           | 0.142799  | 0.000000  |                               |
| 8          | -2.318342           | 2.651929  | 0.000000  |                               |
| 6          | 1.224039            | -1.747704 | 0.000000  |                               |
| 6          | -1.681068           | 3.904183  | 0.000000  |                               |
| 6          | -1.360620           | -1.422968 | 0.000000  |                               |
| 6          | 2.585865            | -1.088634 | 0.000000  |                               |
| 8          | 1.198221            | -3.052438 | 0.000000  |                               |
| 6          | -0.244024           | 3.821850  | 0.000000  |                               |
| 6          | 2.730110            | 0.280367  | 0.000000  |                               |
| 6          | 0.136986            | 5.099011  | 0.000000  |                               |
| 12         | -0.309627           | -4.143903 | 0.000000  |                               |
| 6          | -2.084938           | -2.590043 | 0.000000  |                               |
| 6          | 3.985313            | -0.544167 | 0.000000  |                               |
| 16         |                     |           |           |                               |
| 722.271205 | Kcal/mol            | 31.320683 | eV        | -100.232667 H Child_6_39.log  |
| 8          | 5.723901            | -1.958815 | 0.452317  |                               |

|    |           |           |           |
|----|-----------|-----------|-----------|
| 8  | -3.907036 | 1.827524  | 1.440471  |
| 6  | -3.561023 | -2.787100 | 0.082240  |
| 6  | -2.855771 | 1.244867  | 1.262347  |
| 6  | 4.649522  | -1.469233 | 0.249849  |
| 12 | 3.207415  | 2.397576  | -0.646574 |
| 6  | 3.422942  | -1.125708 | 0.032853  |
| 6  | -3.121387 | -1.553697 | -0.063412 |
| 6  | -1.703733 | 0.748138  | 1.017657  |
| 12 | 0.272182  | -0.866768 | -0.372281 |
| 6  | -9.585705 | 0.240287  | -1.669081 |
| 6  | 2.366262  | -0.334673 | -0.198174 |
| 6  | 1.533598  | 1.254097  | -0.173960 |
| 6  | -1.841051 | -0.782264 | -0.176836 |
| 6  | 5.158583  | 1.831233  | -0.698996 |
| 6  | -3.843919 | -0.152507 | -0.150496 |

16  
727.052675 Kcal/mol 31.528028 eV -100.225048 H

Original3D\_0\_43.log

|    |           |           |           |
|----|-----------|-----------|-----------|
| 6  | 0.051849  | -1.796913 | -0.567146 |
| 12 | 2.287699  | -0.569811 | -0.764080 |
| 6  | 0.203997  | 1.806054  | -1.127345 |
| 6  | 0.477476  | -1.150578 | 0.471356  |
| 12 | -1.101829 | 0.040368  | -0.871813 |
| 6  | 2.614763  | 2.085013  | -1.494167 |
| 6  | 3.232844  | -2.946519 | -0.077862 |
| 6  | -1.408370 | 1.845690  | 1.747260  |
| 6  | 0.727336  | 1.185244  | 0.417540  |
| 6  | -4.256356 | -0.884115 | -0.302557 |
| 8  | 0.104237  | 1.965328  | 2.010532  |
| 8  | -5.190484 | -1.094869 | -1.061260 |
| 6  | -3.243339 | 0.054976  | 1.547799  |
| 6  | 2.980759  | -1.463536 | 1.293381  |
| 6  | 1.526485  | -1.610984 | 1.282517  |
| 6  | 1.502480  | 2.773940  | -1.184687 |

16  
727.463728 Kcal/mol 31.545853 eV -100.224392 H

Original2D\_0\_12.log

|    |           |           |           |
|----|-----------|-----------|-----------|
| 6  | -1.323492 | 0.216856  | -0.000000 |
| 12 | -3.484017 | 0.568766  | -0.000000 |
| 6  | -3.606576 | 2.400462  | -0.000000 |
| 8  | 0.000000  | -0.741757 | -0.000000 |
| 6  | -4.895696 | 2.482749  | -0.000000 |
| 6  | -1.141857 | 1.347176  | -0.000000 |
| 6  | 0.043726  | 2.076218  | 0.000000  |
| 6  | 1.700164  | 1.098663  | 0.000000  |
| 6  | -0.302457 | -2.007529 | -0.000000 |
| 6  | 1.566349  | -0.206181 | 0.000000  |
| 12 | 3.791070  | -0.307540 | 0.000000  |
| 6  | -0.508806 | -3.258110 | -0.000000 |
| 6  | -0.035191 | -4.570023 | -0.000000 |
| 6  | 1.108347  | -3.796247 | 0.000000  |
| 6  | 1.456694  | 2.519756  | 0.000000  |
| 8  | 3.993518  | 1.622075  | 0.000000  |

16  
727.917557 Kcal/mol 31.565533 eV -100.223669 H

Child\_11\_35.log

|    |           |           |           |
|----|-----------|-----------|-----------|
| 6  | 5.275830  | 4.032616  | -0.526299 |
| 6  | -4.018192 | -0.761321 | -0.137095 |
| 8  | 4.645928  | 3.418417  | 0.211854  |
| 12 | -3.996490 | 1.170520  | 0.317298  |
| 6  | 4.348816  | -2.408340 | -0.256795 |
| 6  | -3.511921 | -1.860781 | -0.417625 |
| 6  | 3.980448  | -1.101436 | -0.117398 |
| 6  | -2.800514 | -3.058546 | -0.508575 |
| 6  | 2.918480  | -2.528749 | -0.087054 |
| 6  | -2.543939 | 2.504307  | 0.743412  |
| 6  | 1.472673  | -2.974358 | 0.019159  |
| 6  | -1.715353 | -3.632755 | -0.295326 |
| 6  | 0.202783  | -3.061119 | 0.227783  |
| 6  | -1.246580 | 2.587599  | 0.766878  |
| 12 | -1.826052 | 3.992448  | -0.654619 |
| 8  | 2.315987  | -1.965706 | 0.735828  |

16

728.905750 Kcal/mol 31.608385 eV -100.222094 H

Original3D\_12\_6.log

|    |           |           |           |
|----|-----------|-----------|-----------|
| 6  | -0.592215 | 1.214690  | 1.083950  |
| 6  | -1.608696 | 1.685551  | 0.149402  |
| 8  | -0.156418 | 0.203818  | 0.295399  |
| 6  | -2.200754 | 2.705556  | -0.156543 |
| 6  | 0.894214  | -2.476438 | 0.731539  |
| 12 | 1.091938  | -0.822520 | -0.728287 |
| 6  | -1.658081 | -2.599349 | -1.350822 |
| 12 | 4.219011  | -0.720195 | -0.722778 |
| 6  | -1.912805 | 0.327603  | -0.196145 |
| 6  | -3.037053 | 4.012374  | 0.115240  |
| 6  | 5.907262  | 0.922630  | 0.090272  |
| 6  | 6.250146  | 1.794539  | 1.143949  |
| 8  | -2.461791 | -2.516820 | -0.485589 |
| 6  | -3.265089 | 3.249535  | -0.997059 |
| 6  | -3.263441 | -2.194083 | 0.712339  |
| 6  | -2.644441 | -2.473178 | 1.829593  |

16

729.680876 Kcal/mol 31.641997 eV -100.220859 H

Child\_11\_42.log

|    |           |           |           |
|----|-----------|-----------|-----------|
| 8  | -5.643173 | -1.917078 | -0.592576 |
| 6  | 2.253377  | 1.992202  | -0.822510 |
| 6  | -5.023805 | -0.933479 | -0.350762 |
| 8  | 3.252099  | 1.056614  | -0.720121 |
| 6  | -4.447723 | 0.191586  | 0.090003  |
| 6  | 1.048226  | 1.488634  | -0.276037 |
| 6  | 3.978679  | -1.855103 | -0.503263 |
| 6  | 2.703375  | -0.172535 | -0.069381 |
| 6  | 0.282976  | -0.686171 | 0.558811  |
| 12 | -1.000206 | 1.118518  | 0.022069  |
| 6  | 2.803281  | -1.552345 | -0.920643 |
| 6  | -4.707212 | 1.347294  | 0.789132  |
| 6  | -0.870901 | -0.996036 | 0.949151  |
| 6  | 1.320523  | 0.149804  | 0.115310  |
| 6  | -3.293955 | 1.105586  | 0.167834  |
| 12 | 4.570836  | -0.584594 | 0.989239  |

16

733.029786 Kcal/mol 31.787220 eV -100.215522 H

MutI\_3\_71.log

|            |           |           |           |               |                 |
|------------|-----------|-----------|-----------|---------------|-----------------|
| 6          | 3.098230  | -1.925383 | -0.952055 |               |                 |
| 6          | 0.444633  | -0.987741 | -1.099301 |               |                 |
| 6          | -4.448808 | -2.793252 | 0.918581  |               |                 |
| 6          | 0.884893  | 1.284683  | -0.600417 |               |                 |
| 6          | 1.561137  | -1.585993 | -1.221424 |               |                 |
| 6          | -2.128765 | 1.731633  | 0.169412  |               |                 |
| 6          | 3.684554  | -1.029250 | -0.243059 |               |                 |
| 6          | -0.201158 | 0.266170  | -0.750695 |               |                 |
| 6          | 4.189044  | -0.465743 | 0.954534  |               |                 |
| 8          | -3.774138 | -1.988768 | 0.527722  |               |                 |
| 6          | -2.926248 | 2.575911  | 0.726770  |               |                 |
| 6          | -1.492215 | 0.565798  | -0.372112 |               |                 |
| 8          | 4.904580  | -0.079936 | 1.911206  |               |                 |
| 12         | -0.459276 | 2.742495  | -0.152727 |               |                 |
| 6          | 2.133440  | 1.084873  | -0.543951 |               |                 |
| 12         | -2.693720 | -0.724211 | 0.033634  |               |                 |
| 16         |           |           |           |               |                 |
| 733.865775 | Kcal/mol  | 31.823472 | eV        | -100.214190 H | Child_16_14.log |
| 12         | 2.912729  | 0.176397  | -0.838666 |               |                 |
| 6          | -3.284672 | -1.066274 | 1.561316  |               |                 |
| 8          | 4.480247  | -0.337761 | -0.113040 |               |                 |
| 6          | -3.420433 | -2.117093 | 0.830966  |               |                 |
| 12         | 5.756450  | -0.864646 | 1.026326  |               |                 |
| 6          | -2.691905 | 0.044795  | 1.866129  |               |                 |
| 6          | 0.851751  | 0.516081  | -0.997372 |               |                 |
| 8          | -3.261628 | -2.741212 | -0.161174 |               |                 |
| 6          | -0.089142 | -0.364961 | -1.309778 |               |                 |
| 6          | 0.163143  | 1.598439  | -0.283806 |               |                 |
| 6          | -2.643237 | 2.478125  | 0.291001  |               |                 |
| 6          | -1.235289 | -0.928748 | -1.460754 |               |                 |
| 6          | -3.526843 | 2.335951  | -0.588157 |               |                 |
| 6          | -0.858292 | 2.260624  | 0.410108  |               |                 |
| 6          | -2.527459 | -1.072816 | -1.471022 |               |                 |
| 6          | 0.299196  | 1.797675  | 1.141668  |               |                 |
| 16         |           |           |           |               |                 |
| 736.239964 | Kcal/mol  | 31.926427 | eV        | -100.210407 H | Child_17_24.log |
| 8          | -8.306982 | 1.205031  | -0.205467 |               |                 |
| 6          | 8.956857  | 0.304551  | -0.111195 |               |                 |
| 6          | -7.359229 | 0.505674  | -0.137199 |               |                 |
| 6          | 8.477584  | -0.351418 | 0.869756  |               |                 |
| 6          | -6.311482 | -0.251657 | -0.043647 |               |                 |
| 12         | 6.728795  | -0.439714 | -0.103759 |               |                 |
| 6          | -5.298533 | -0.995304 | -0.061156 |               |                 |
| 6          | 4.619433  | -0.654795 | -0.443271 |               |                 |
| 6          | -4.170504 | -1.691375 | -0.069154 |               |                 |
| 6          | 3.445288  | -0.247894 | -0.387413 |               |                 |
| 12         | -2.458370 | -0.235274 | 0.600839  |               |                 |
| 6          | 2.461062  | 0.686918  | -0.446009 |               |                 |
| 6          | -1.063557 | 1.314973  | 1.127292  |               |                 |
| 6          | -3.120700 | -2.428981 | -0.211543 |               |                 |
| 6          | -1.087128 | 1.137746  | -0.187902 |               |                 |
| 8          | 2.239526  | 1.811122  | -0.464072 |               |                 |
| 16         |           |           |           |               |                 |
| 736.635008 | Kcal/mol  | 31.943558 | eV        | -100.209777 H | Child_2_55.log  |
| 6          | 1.840247  | -0.942018 | 1.792422  |               |                 |

|            |           |           |           |                              |
|------------|-----------|-----------|-----------|------------------------------|
| 6          | -0.278844 | 1.313976  | -1.567763 |                              |
| 6          | 0.666418  | -1.087054 | 1.376615  |                              |
| 6          | 0.870618  | 0.748263  | -1.290071 |                              |
| 6          | -1.816593 | -0.825696 | 0.828833  |                              |
| 6          | -1.550787 | 0.902462  | -1.045951 |                              |
| 6          | -0.509925 | -1.160231 | 0.635432  |                              |
| 12         | 2.764805  | -0.090107 | -1.074881 |                              |
| 6          | -3.072262 | -0.534265 | 0.674777  |                              |
| 6          | -1.103590 | -0.631246 | -0.912061 |                              |
| 12         | 3.309048  | -0.569832 | 0.401286  |                              |
| 6          | -1.968393 | -1.676460 | -1.169591 |                              |
| 6          | -4.304736 | -0.226653 | 0.403676  |                              |
| 8          | -1.626246 | 1.525795  | 0.263022  |                              |
| 8          | 0.663318  | 3.021667  | 1.442557  |                              |
| 6          | 0.364046  | -0.624484 | -0.653234 |                              |
| 16         |           |           |           |                              |
| 742.317682 | Kcal/mol  | 32.189982 | eV        | -100.200721 H MutD_17_72.log |
| 12         | 4.830912  | 3.065440  | -1.305019 |                              |
| 6          | -6.815432 | 0.820786  | -0.872454 |                              |
| 6          | 2.314523  | -0.358164 | 1.908845  |                              |
| 6          | -8.325206 | 0.617516  | -0.652708 |                              |
| 6          | -1.291759 | 3.005606  | 1.581002  |                              |
| 6          | 2.930141  | 0.623889  | 0.851095  |                              |
| 6          | -0.037413 | -2.642443 | 0.765039  |                              |
| 8          | -5.258521 | 1.127328  | -0.084590 |                              |
| 6          | 1.653917  | -1.389549 | -0.142201 |                              |
| 12         | 0.587249  | -2.110595 | -1.758231 |                              |
| 8          | -0.898461 | 1.384702  | 1.410531  |                              |
| 6          | 1.079899  | -1.775856 | 1.097721  |                              |
| 6          | 1.627433  | -1.023571 | 2.157558  |                              |
| 6          | 2.394977  | -0.221836 | -0.353503 |                              |
| 6          | 2.466680  | 0.173093  | -1.715569 |                              |
| 6          | -0.624772 | -3.088534 | -0.266247 |                              |
| 16         |           |           |           |                              |
| 743.253445 | Kcal/mol  | 32.230561 | eV        | -100.199230 H MutI_8_65.log  |
| 6          | -0.069638 | 0.884613  | -0.534730 |                              |
| 8          | -2.505998 | -0.893342 | 0.831276  |                              |
| 6          | -5.738447 | 1.195985  | -0.009023 |                              |
| 6          | 0.406817  | -2.149816 | -0.059913 |                              |
| 6          | 2.029730  | 0.805462  | -2.015574 |                              |
| 6          | 0.654644  | 0.939771  | -1.739811 |                              |
| 8          | -2.139985 | -2.022026 | -0.137342 |                              |
| 6          | 4.807239  | 2.218426  | 0.548864  |                              |
| 6          | -0.810854 | -2.065862 | -0.159752 |                              |
| 6          | 1.738459  | -2.145891 | 0.024354  |                              |
| 6          | -5.104297 | 2.351653  | -0.037186 |                              |
| 6          | 1.520455  | 0.732453  | -0.547615 |                              |
| 12         | -3.789741 | 0.485094  | 0.566854  |                              |
| 12         | 3.602790  | 0.139342  | 0.353635  |                              |
| 6          | 2.980865  | -1.945974 | 0.166936  |                              |
| 6          | 4.153574  | 1.817466  | 1.597225  |                              |
| 16         |           |           |           |                              |
| 744.938933 | Kcal/mol  | 32.303650 | eV        | -100.196544 H Child_8_40.log |
| 6          | -2.979075 | 3.223364  | -0.137250 |                              |
| 12         | 3.149414  | -2.318580 | -0.268035 |                              |

|    |           |           |           |
|----|-----------|-----------|-----------|
| 6  | -3.741543 | 2.253665  | 0.081982  |
| 6  | 4.639706  | -0.909865 | -0.369616 |
| 6  | -4.271779 | 1.015629  | 0.274382  |
| 6  | 1.240349  | -2.926564 | 0.066213  |
| 12 | -1.092932 | 2.495713  | -0.387532 |
| 6  | 0.004051  | -2.839643 | 0.177213  |
| 6  | -4.298864 | -0.211718 | 0.378435  |
| 6  | 4.002763  | 0.110898  | 0.002147  |
| 6  | -3.861087 | -1.497973 | 0.406856  |
| 6  | -1.319907 | -2.543277 | 0.250463  |
| 6  | 0.027903  | 0.792743  | -0.400625 |
| 6  | 3.404465  | 1.243613  | 0.403095  |
| 8  | 6.938676  | 2.881644  | 0.422318  |
| 8  | -4.658635 | -1.430496 | -0.288938 |

16

748.825953 Kcal/mol 32.472208 eV -100.190350 H

Original2D\_6\_1.log

|    |           |           |           |
|----|-----------|-----------|-----------|
| 6  | 1.764164  | -3.170082 | 0.000000  |
| 6  | 0.403170  | -2.553074 | 0.000000  |
| 6  | 0.955149  | -1.281687 | 0.000000  |
| 8  | 0.000000  | -0.268603 | 0.000000  |
| 6  | -1.630291 | 1.159766  | -0.000000 |
| 8  | -0.845945 | -2.882559 | 0.000000  |
| 12 | -1.937348 | -1.175371 | 0.000000  |
| 6  | -2.905133 | 1.205353  | -0.000000 |
| 6  | 2.331866  | -1.702149 | 0.000000  |
| 6  | -0.221751 | 1.107203  | -0.000000 |
| 12 | -0.976721 | 3.376421  | -0.000000 |
| 6  | -2.371590 | 4.911224  | -0.000000 |
| 6  | 3.456877  | -0.995647 | 0.000000  |
| 6  | 4.116539  | 0.127569  | 0.000000  |
| 6  | -1.186989 | 5.401066  | -0.000000 |
| 6  | 2.244053  | -4.410092 | 0.000000  |

16

754.909942 Kcal/mol 32.736035 eV -100.180654 H

MutD\_16\_56.log

|    |            |           |           |
|----|------------|-----------|-----------|
| 8  | 8.845498   | 0.619704  | 0.292911  |
| 12 | -10.561411 | 0.442021  | 0.385987  |
| 6  | -4.921086  | 0.239638  | -0.140914 |
| 6  | 12.135455  | -0.251336 | -0.232038 |
| 6  | -6.244057  | -0.014563 | -0.067342 |
| 6  | 7.721103   | 0.269170  | 0.199081  |
| 6  | 2.593195   | -0.276243 | 0.086896  |
| 8  | -8.734945  | -0.380475 | -0.164383 |
| 6  | -2.516560  | 0.937557  | -0.629272 |
| 6  | 5.206357   | -0.098904 | 0.197971  |
| 6  | 3.867788   | -0.166772 | 0.150168  |
| 6  | 6.462573   | 0.014637  | 0.264752  |
| 12 | -1.506974  | -0.867742 | 0.016649  |
| 6  | -3.685079  | 0.292832  | -0.362530 |
| 6  | -7.505226  | -0.367737 | -0.073654 |
| 6  | 10.874903  | -0.045810 | -0.369763 |

16

757.023310 Kcal/mol 32.827679 eV -100.177286 H

Child\_18\_16.log

|   |           |           |          |
|---|-----------|-----------|----------|
| 6 | -7.457067 | -0.644843 | 0.226165 |
| 6 | 4.737791  | -0.287300 | 0.120716 |



|    |           |           |           |
|----|-----------|-----------|-----------|
| 6  | -6.104782 | -0.790618 | 0.104554  |
| 6  | 4.149449  | 0.810032  | -0.102546 |
| 8  | -4.922388 | -0.919309 | 0.049251  |
| 6  | 4.447661  | -1.597412 | 0.358026  |
| 6  | -1.302414 | -1.989535 | -0.914832 |
| 6  | 3.523860  | -2.453566 | 0.572270  |
| 8  | -0.999967 | -1.140734 | -1.587728 |
| 6  | 2.217304  | -1.970136 | 0.574250  |
| 6  | 0.008682  | 2.672360  | -0.672082 |
| 12 | 2.052022  | 0.752138  | -0.387537 |
| 6  | -0.917177 | 3.128132  | 0.191792  |
| 6  | 1.361449  | -1.048113 | 0.483155  |
| 6  | 0.976147  | 2.382431  | -1.490489 |
| 12 | -0.924238 | 1.515507  | 1.687699  |

16

758.680573 Kcal/mol 32.899545 eV -100.174645 H

Original1D\_12\_0.log

|    |          |          |            |
|----|----------|----------|------------|
| 6  | 0.000000 | 0.000000 | -0.695493  |
| 8  | 0.000000 | 0.000000 | 0.581641   |
| 6  | 0.000000 | 0.000000 | 1.891843   |
| 6  | 0.000000 | 0.000000 | -1.902249  |
| 6  | 0.000000 | 0.000000 | -3.277520  |
| 6  | 0.000000 | 0.000000 | 3.108888   |
| 6  | 0.000000 | 0.000000 | -4.580809  |
| 6  | 0.000000 | 0.000000 | 4.433467   |
| 8  | 0.000000 | 0.000000 | 5.649124   |
| 6  | 0.000000 | 0.000000 | 6.911025   |
| 12 | 0.000000 | 0.000000 | -6.467794  |
| 12 | 0.000000 | 0.000000 | 8.777683   |
| 6  | 0.000000 | 0.000000 | 10.987510  |
| 6  | 0.000000 | 0.000000 | -8.629573  |
| 6  | 0.000000 | 0.000000 | -9.916082  |
| 6  | 0.000000 | 0.000000 | -11.258475 |

16

760.392484 Kcal/mol 32.973781 eV -100.171917 H

MutI\_13\_51.log

|    |           |           |           |
|----|-----------|-----------|-----------|
| 6  | 2.316495  | 1.453469  | 1.651631  |
| 12 | 0.182258  | -0.207927 | 0.964074  |
| 6  | -1.605615 | -1.051686 | 0.526545  |
| 12 | -3.220079 | -0.356031 | -0.774214 |
| 8  | -0.431367 | 1.768737  | -0.782675 |
| 6  | 9.740717  | -2.582610 | -0.376582 |
| 6  | 1.673520  | 0.591847  | 1.603731  |
| 6  | -3.243826 | -1.846116 | 0.252552  |
| 8  | -4.280025 | -2.456640 | 0.351706  |
| 6  | -5.214037 | -3.142916 | 0.587448  |
| 6  | 1.883380  | 3.371177  | 0.134558  |
| 6  | -3.272864 | 1.219879  | -1.835783 |
| 6  | -2.047316 | 1.110475  | -1.216234 |
| 6  | 8.891446  | -3.124116 | -1.393144 |
| 6  | 0.832838  | 3.386254  | -0.710605 |
| 6  | 2.402761  | 2.659463  | 0.970788  |

16

760.458564 Kcal/mol 32.976646 eV -100.171812 H

Original3D\_17\_5.log

|   |          |           |          |
|---|----------|-----------|----------|
| 6 | 1.435992 | -2.063072 | 0.396301 |
|---|----------|-----------|----------|

|    |           |           |           |
|----|-----------|-----------|-----------|
| 8  | -0.366533 | 0.226454  | 0.477415  |
| 12 | -1.566784 | -0.585266 | -1.035701 |
| 6  | 1.192952  | -0.224074 | 0.787264  |
| 6  | 2.592497  | -0.096360 | -0.240077 |
| 6  | 1.125696  | -1.581924 | 1.664252  |
| 6  | 3.562469  | 1.070676  | 0.197793  |
| 6  | 1.235578  | -1.490422 | -1.338255 |
| 6  | 2.747198  | 1.559225  | -1.290861 |
| 12 | -1.484057 | -0.696876 | 2.171378  |
| 6  | -0.330358 | 1.680075  | 1.161750  |
| 6  | 2.654691  | -0.898518 | -1.470134 |
| 6  | -2.802840 | 1.928128  | -1.181438 |
| 6  | -1.543069 | 1.979892  | -1.013230 |
| 6  | -3.767910 | -2.682511 | -1.488843 |
| 8  | -1.134377 | 2.310924  | 0.680679  |

16

761.132850 Kcal/mol 33.005886 eV -100.170737 H  
Original3D\_18\_6.log

|    |           |           |           |
|----|-----------|-----------|-----------|
| 8  | -2.135912 | 0.319574  | -2.117402 |
| 6  | -0.665021 | 0.172298  | 0.623646  |
| 12 | 0.692919  | -0.262496 | -1.118852 |
| 6  | 1.273947  | 2.357876  | -0.141455 |
| 6  | 3.292679  | -0.734709 | -1.343871 |
| 6  | 2.387783  | -2.031481 | -0.601764 |
| 8  | -2.735995 | -1.399948 | 0.532094  |
| 12 | 1.438691  | 2.325035  | 1.901488  |
| 6  | 2.609709  | -3.272593 | 0.039571  |
| 6  | -1.945330 | -2.122448 | 0.972932  |
| 6  | -0.348233 | -0.326556 | 2.129189  |
| 6  | 0.251425  | -2.057742 | 1.324835  |
| 6  | -1.710040 | 1.655875  | -1.155854 |
| 6  | 2.111006  | 2.174807  | -1.074940 |
| 6  | -3.009798 | 0.063542  | -0.489050 |
| 6  | -2.015470 | 1.436551  | 0.265233  |

16  
762.677605 Kcal/mol 33.072873 eV -100.168276 H  
Original3D\_1\_5.log

|    |           |           |           |
|----|-----------|-----------|-----------|
| 6  | 2.994864  | 0.259533  | 1.324190  |
| 8  | 1.889201  | 0.793586  | -1.409186 |
| 6  | 1.035340  | 0.880267  | -1.767310 |
| 6  | 3.199300  | -0.174792 | -0.940039 |
| 6  | 3.168387  | -2.135149 | -0.600062 |
| 6  | 1.345717  | 2.082699  | 0.581814  |
| 12 | -0.316139 | -0.401399 | -0.525637 |
| 6  | 0.380849  | 2.852189  | 0.077450  |
| 8  | 1.710739  | -1.946416 | 0.848138  |
| 6  | -1.863526 | -0.092698 | 1.494607  |
| 6  | -2.634246 | -0.887492 | 0.522592  |
| 6  | 1.850887  | 1.078516  | 1.178355  |
| 6  | 2.687315  | -1.179892 | 0.330432  |
| 6  | -2.356657 | 1.039397  | 0.913186  |
| 6  | -3.456783 | -1.234375 | -0.240186 |
| 12 | -5.259544 | -0.074149 | -0.537846 |

16  
767.366697 Kcal/mol 33.276211 eV -100.160803 H Child\_5\_23.log

|    |           |           |           |
|----|-----------|-----------|-----------|
| 6  | 1.904391  | -2.910737 | 0.194187  |
| 6  | -7.356448 | 1.168263  | -0.764401 |
| 6  | -0.450473 | -2.137755 | 1.122776  |
| 6  | 2.883159  | 1.906496  | -1.601170 |
| 6  | 3.112400  | -2.696682 | -0.377170 |
| 12 | 3.325263  | 3.548673  | 0.792024  |
| 6  | 0.833681  | -2.425998 | 0.575933  |
| 6  | 2.779213  | 1.718185  | -0.265027 |
| 8  | 4.271964  | -2.515036 | -0.919723 |
| 6  | 2.549403  | 1.613693  | 0.797022  |
| 6  | 0.112276  | -1.158584 | 0.521068  |
| 6  | -6.213613 | 0.671350  | -0.484791 |
| 6  | -3.535849 | 0.133336  | 0.067846  |
| 6  | -5.018280 | 0.240899  | -0.125470 |
| 12 | 0.978320  | 0.601463  | -0.466543 |
| 8  | -4.427234 | -0.802018 | 0.685901  |

16

768.468176 Kcal/mol 33.323976 eV -100.159048 H

Original2D\_10\_2.log

|    |           |           |           |
|----|-----------|-----------|-----------|
| 6  | -1.961783 | 0.139105  | 0.000000  |
| 6  | -0.000000 | 0.735734  | 0.000000  |
| 6  | -1.115112 | 1.397539  | 0.000000  |
| 8  | -2.016764 | 2.520065  | 0.000000  |
| 6  | -3.037270 | 3.018645  | 0.000000  |
| 6  | 2.135558  | 1.125943  | 0.000000  |
| 6  | 0.243135  | -1.264801 | -0.000000 |
| 6  | 1.192167  | -0.104983 | -0.000000 |
| 6  | 3.358469  | 0.198449  | -0.000000 |
| 8  | 2.490031  | -1.054738 | -0.000000 |
| 6  | 1.349805  | -2.138018 | -0.000000 |
| 6  | 1.001503  | 1.984311  | 0.000000  |
| 12 | 2.907145  | -3.054648 | -0.000000 |
| 6  | -3.231166 | 0.094374  | 0.000000  |
| 12 | -5.383003 | -0.215154 | 0.000000  |
| 6  | 4.385387  | -0.600464 | -0.000000 |

16

771.005131 Kcal/mol 33.433989 eV -100.155005 H

Child\_6\_45.log

|    |           |           |           |
|----|-----------|-----------|-----------|
| 6  | -3.337592 | -1.597432 | -0.577951 |
| 8  | 5.604914  | 2.205724  | 0.459440  |
| 6  | -2.061152 | -1.983038 | -0.350668 |
| 6  | -0.380388 | 3.573476  | 0.187504  |
| 6  | 2.134317  | -2.637196 | -0.416661 |
| 6  | 4.860694  | 1.507032  | -0.095825 |
| 12 | 0.054637  | -2.312681 | 0.005504  |
| 8  | 0.163144  | 2.776659  | -0.500221 |
| 6  | -2.373111 | -0.562323 | -0.188436 |
| 6  | 0.328017  | -1.349266 | 1.953176  |
| 6  | 3.072145  | -1.816081 | -0.528967 |
| 6  | 4.014228  | 0.775658  | -0.741323 |
| 6  | -1.695277 | 0.434655  | 0.139329  |
| 6  | -0.493581 | -0.440664 | 1.537479  |
| 6  | 3.694558  | -0.726160 | -0.596528 |
| 12 | -7.781438 | 1.401761  | -0.138881 |

16

775.654439 Kcal/mol 33.635602 eV -100.147596 H

MutI\_15\_69.log

|            |                    |           |            |                              |
|------------|--------------------|-----------|------------|------------------------------|
| 6          | 0.000000           | 0.000000  | -6.836812  |                              |
| 6          | 0.000000           | 0.000000  | -0.526731  |                              |
| 6          | 0.000000           | 0.000000  | -1.779273  |                              |
| 6          | 0.000000           | 0.000000  | -8.157571  |                              |
| 6          | 0.000000           | 0.000000  | 10.213844  |                              |
| 6          | 0.000000           | 0.000000  | -9.494067  |                              |
| 6          | 0.000000           | 0.000000  | 7.643009   |                              |
| 6          | 0.000000           | 0.000000  | -4.280605  |                              |
| 6          | 0.000000           | 0.000000  | 8.908103   |                              |
| 12         | 0.000000           | 0.000000  | 1.046782   |                              |
| 12         | 0.000000           | 0.000000  | 3.156800   |                              |
| 6          | 0.000000           | 0.000000  | -10.703279 |                              |
| 6          | 0.000000           | 0.000000  | -3.059537  |                              |
| 8          | 0.000000           | 0.000000  | 6.454817   |                              |
| 8          | 0.000000           | 0.000000  | 4.974906   |                              |
| 6          | 0.000000           | 0.000000  | -5.573876  |                              |
| 16         |                    |           |            |                              |
| 779.240551 | Kcal/mol           | 33.791111 | eV         | -100.141881 H MutD_15_66.log |
| 6          | -0.617803          | -2.042314 | 1.141937   |                              |
| 8          | 2.650152           | -1.027759 | 0.500500   |                              |
| 6          | 2.496157           | -0.900789 | -0.706966  |                              |
| 6          | -3.514039          | 2.718600  | 1.822343   |                              |
| 6          | 1.176886           | 1.871007  | -0.690617  |                              |
| 6          | 3.908327           | -0.173247 | -0.005173  |                              |
| 12         | 5.588122           | -0.013434 | -0.143526  |                              |
| 6          | 0.805564           | -2.028482 | 0.536458   |                              |
| 6          | -0.323847          | 1.834793  | -0.380320  |                              |
| 6          | -4.397890          | -1.297418 | -0.658892  |                              |
| 12         | -1.983312          | 0.846698  | -0.419023  |                              |
| 6          | -1.784768          | -2.155073 | 0.684911   |                              |
| 6          | -3.010159          | -0.911526 | 0.121005   |                              |
| 6          | 2.020415           | 0.961290  | -0.300384  |                              |
| 8          | -1.430251          | 2.587328  | 0.077406   |                              |
| 6          | -5.594996          | -1.622793 | -1.209747  |                              |
| 16         |                    |           |            |                              |
| 779.450529 | Kcal/mol           | 33.800217 | eV         | -100.141546 H                |
|            | OriginalID_4_0.log |           |            |                              |
| 6          | 0.000000           | 0.000000  | -9.617143  |                              |
| 8          | 0.000000           | 0.000000  | -10.937143 |                              |
| 6          | 0.000000           | 0.000000  | -8.297143  |                              |
| 6          | 0.000000           | 0.000000  | -6.977143  |                              |
| 6          | 0.000000           | 0.000000  | -5.657143  |                              |
| 6          | 0.000000           | 0.000000  | -4.337143  |                              |
| 6          | 0.000000           | 0.000000  | -3.017143  |                              |
| 12         | 0.000000           | 0.000000  | -1.697143  |                              |
| 6          | 0.000000           | 0.000000  | 0.942857   |                              |
| 6          | 0.000000           | 0.000000  | 2.262857   |                              |
| 8          | 0.000000           | 0.000000  | 3.582857   |                              |
| 6          | 0.000000           | 0.000000  | 4.902857   |                              |
| 6          | 0.000000           | 0.000000  | 6.222857   |                              |
| 12         | 0.000000           | 0.000000  | 7.542857   |                              |
| 6          | 0.000000           | 0.000000  | 10.182857  |                              |
| 6          | 0.000000           | 0.000000  | 11.502857  |                              |
| 16         |                    |           |            |                              |
| 782.871731 | Kcal/mol           | 33.948574 | eV         | -100.136094 H MutD_8_68.log  |

|            |           |           |           |                                   |
|------------|-----------|-----------|-----------|-----------------------------------|
| 12         | 3.645489  | 1.895414  | -0.151562 |                                   |
| 6          | 3.121895  | -1.430260 | -1.798620 |                                   |
| 8          | 0.589165  | -3.357637 | 0.162881  |                                   |
| 12         | 0.042721  | 2.561428  | 0.328702  |                                   |
| 6          | -2.422334 | -0.747054 | -1.650548 |                                   |
| 6          | 1.105772  | -0.348411 | 0.468937  |                                   |
| 6          | 0.213625  | -1.036151 | -0.399654 |                                   |
| 6          | -1.059407 | -0.774735 | -0.743172 |                                   |
| 8          | -2.731515 | -1.438879 | 1.742140  |                                   |
| 6          | -1.575381 | 1.452252  | 0.203738  |                                   |
| 6          | -1.398448 | 2.677869  | 0.554589  |                                   |
| 6          | 2.284829  | -1.198111 | 0.421558  |                                   |
| 6          | -2.704244 | -0.553414 | 0.947361  |                                   |
| 6          | -3.631093 | 0.567688  | -1.911996 |                                   |
| 6          | -1.863489 | 0.193522  | 0.002159  |                                   |
| 6          | 3.408319  | -1.321523 | 1.011341  |                                   |
| 16         |           |           |           |                                   |
| 786.266975 | Kcal/mol  | 34.095806 | eV        | -100.130683 H MutI_1_75.log       |
| 6          | -3.658173 | 3.909673  | 0.000000  |                                   |
| 6          | -1.104431 | -2.715917 | 0.000000  |                                   |
| 6          | 1.247984  | 1.197378  | -0.000000 |                                   |
| 6          | -3.164176 | -1.382824 | 0.000000  |                                   |
| 6          | 0.000000  | 1.431756  | 0.000000  |                                   |
| 6          | 3.711843  | 0.598208  | -0.000000 |                                   |
| 6          | -3.903234 | -2.709317 | 0.000000  |                                   |
| 12         | -2.242440 | 3.101389  | 0.000000  |                                   |
| 8          | -1.576692 | -0.206020 | 0.000000  |                                   |
| 6          | 4.933755  | 1.073519  | -0.000000 |                                   |
| 6          | -0.748520 | 2.157107  | 0.000000  |                                   |
| 6          | 2.427279  | 0.870806  | -0.000000 |                                   |
| 8          | 0.026130  | -2.434721 | -0.000000 |                                   |
| 12         | 3.682059  | -1.253827 | -0.000000 |                                   |
| 6          | 1.886249  | -1.953401 | -0.000000 |                                   |
| 6          | -2.440398 | -2.651126 | 0.000000  |                                   |
| 16         |           |           |           |                                   |
| 795.482776 | Kcal/mol  | 34.495442 | eV        | -100.115997 H MutI_12_65.log      |
| 6          | -0.189543 | 2.626838  | 0.137420  |                                   |
| 6          | -1.868891 | 2.480278  | 0.974453  |                                   |
| 6          | 2.582655  | -0.809761 | -0.053902 |                                   |
| 6          | 1.945570  | -1.895834 | 0.168352  |                                   |
| 6          | -4.899951 | 0.146228  | -0.677887 |                                   |
| 6          | 5.352017  | 1.735013  | -0.223295 |                                   |
| 6          | 4.222910  | 1.093539  | -0.227905 |                                   |
| 6          | 2.746239  | 0.724836  | -0.173444 |                                   |
| 6          | -4.071590 | -0.771364 | -1.113367 |                                   |
| 8          | 1.846476  | 1.527404  | -0.194927 |                                   |
| 6          | -1.926429 | -2.162294 | 0.987540  |                                   |
| 8          | -5.629937 | 0.929781  | -0.190179 |                                   |
| 12         | 4.566146  | -0.893468 | -0.123882 |                                   |
| 6          | -3.558727 | 1.467704  | 0.713050  |                                   |
| 6          | 1.318603  | -2.995607 | 0.424867  |                                   |
| 12         | -2.870270 | -1.564443 | -0.087321 |                                   |
| 16         |           |           |           |                                   |
| 806.377599 | Kcal/mol  | 34.967886 | eV        | -100.098635 H Original3D_0_65.log |

|    |           |           |           |
|----|-----------|-----------|-----------|
| 6  | -0.809017 | -1.542140 | -0.451367 |
| 6  | 1.937023  | -1.739782 | -0.355344 |
| 6  | 2.590419  | -1.349030 | -1.332878 |
| 6  | -1.906910 | -0.135080 | 0.801654  |
| 6  | 1.978488  | 0.368952  | 1.934087  |
| 8  | 0.280802  | 0.993660  | 0.491250  |
| 6  | -2.912833 | -0.289371 | -0.114610 |
| 8  | -0.503706 | 2.084856  | 0.262571  |
| 12 | 0.707528  | -0.838159 | 0.742599  |
| 12 | -2.241892 | -2.302330 | 0.180632  |
| 6  | -1.537096 | 1.642658  | -0.677672 |
| 6  | 2.928128  | 0.101280  | -0.750513 |
| 6  | 3.722990  | 0.389457  | -1.825460 |
| 6  | 1.178455  | 1.439297  | 2.912410  |
| 6  | -2.474929 | 0.757672  | -1.256453 |
| 6  | -1.328785 | 2.532379  | -1.735411 |

16

811.272821 Kcal/mol 35.180164 eV -100.090834 H

Original2D\_11\_2.log

|    |           |           |           |
|----|-----------|-----------|-----------|
| 6  | -3.070716 | 1.807668  | 0.000000  |
| 6  | -1.952074 | 0.755678  | 0.000000  |
| 6  | -2.752431 | -0.295404 | 0.000000  |
| 12 | -0.933317 | 2.325467  | -0.000000 |
| 6  | -0.000000 | -0.326636 | 0.000000  |
| 6  | 2.220209  | 0.227276  | -0.000000 |
| 8  | 2.865541  | -2.320172 | -0.000000 |
| 6  | 2.882996  | 1.322718  | -0.000000 |
| 6  | -0.592700 | -1.486004 | 0.000000  |
| 6  | 3.334136  | -0.807554 | -0.000000 |
| 6  | 4.498690  | -1.469914 | -0.000000 |
| 8  | -2.074051 | -1.850747 | 0.000000  |
| 6  | -4.066315 | 2.462180  | 0.000000  |
| 12 | 1.395426  | -1.391801 | -0.000000 |
| 6  | -4.241474 | -0.433376 | 0.000000  |
| 6  | 1.760141  | 1.937261  | -0.000000 |

16

812.614977 Kcal/mol 35.238365 eV -100.088695 H

Child\_17\_9.log

|    |           |           |           |
|----|-----------|-----------|-----------|
| 8  | 6.347303  | 0.741702  | 0.770339  |
| 6  | -5.066822 | -0.920106 | 0.828781  |
| 6  | 5.257755  | 0.693614  | 0.281638  |
| 6  | -4.586760 | 0.250999  | 0.805834  |
| 6  | 4.204389  | -2.081206 | 0.188243  |
| 8  | -3.777872 | 1.305698  | 0.709434  |
| 6  | 4.263258  | -0.805595 | 0.259481  |
| 6  | -3.750406 | -1.888341 | -0.056091 |
| 12 | 2.215085  | -1.664553 | -0.236724 |
| 6  | -2.643681 | 1.686898  | 0.289123  |
| 6  | 0.410767  | -0.872240 | -0.474354 |
| 6  | -1.567558 | 1.272519  | -0.247170 |
| 6  | 1.165691  | 5.986681  | -0.777148 |
| 12 | -1.889823 | -1.471245 | -0.764673 |
| 6  | -0.310761 | 0.183778  | -0.486162 |
| 6  | -1.452304 | 0.034727  | -0.582411 |

16

813.338532 Kcal/mol 35.269741 eV -100.087542 H

MutI\_16\_69.log

|                                                |           |           |           |                |
|------------------------------------------------|-----------|-----------|-----------|----------------|
| 6                                              | 8.005120  | 2.114076  | 0.124694  |                |
| 6                                              | -3.725967 | 2.035526  | -0.408198 |                |
| 6                                              | -1.161530 | -2.990472 | -1.106744 |                |
| 6                                              | -3.362598 | -1.504601 | -1.528359 |                |
| 6                                              | 6.262460  | 1.185788  | 0.114144  |                |
| 6                                              | 3.988356  | -0.028819 | 0.020578  |                |
| 6                                              | -3.738495 | 3.103653  | 0.310947  |                |
| 8                                              | -2.515884 | -4.079463 | 3.188499  |                |
| 6                                              | 2.906532  | -0.598764 | 0.002801  |                |
| 6                                              | -2.294146 | -2.174427 | -1.352353 |                |
| 6                                              | -0.332537 | -2.554665 | -0.172959 |                |
| 6                                              | 1.822807  | -1.180105 | -0.025616 |                |
| 6                                              | 0.766503  | -1.798674 | -0.076115 |                |
| 8                                              | 5.121816  | 0.572273  | 0.051314  |                |
| 12                                             | -3.593112 | 4.056513  | 1.078542  |                |
| 12                                             | -2.712427 | 0.477356  | -1.189827 |                |
| 16                                             |           |           |           |                |
| 814.195123 Kcal/mol 35.306887 eV -100.086177 H |           |           |           | MutI_7_67.log  |
| 6                                              | 1.258173  | 0.366528  | 0.279686  |                |
| 6                                              | 1.754326  | -0.694833 | 0.128452  |                |
| 12                                             | -0.483683 | 0.782574  | 0.168039  |                |
| 8                                              | -0.952616 | -3.222422 | 0.091463  |                |
| 6                                              | 0.358308  | -2.289560 | 0.579377  |                |
| 6                                              | 4.978496  | 0.291782  | -0.475298 |                |
| 6                                              | -2.917359 | -2.787625 | -0.316225 |                |
| 6                                              | -2.167774 | 2.174065  | -0.075648 |                |
| 6                                              | -1.900982 | 3.536587  | 0.050766  |                |
| 12                                             | 3.453090  | -0.193114 | -0.207027 |                |
| 6                                              | -0.048594 | 3.619190  | 0.004119  |                |
| 6                                              | -2.631686 | -1.485884 | -0.249087 |                |
| 8                                              | -2.824634 | -0.245332 | -0.244883 |                |
| 6                                              | 1.579514  | -1.985974 | 0.149709  |                |
| 6                                              | -2.263746 | 0.910710  | -0.076944 |                |
| 6                                              | 1.098841  | 1.789766  | 0.283628  |                |
| 16                                             |           |           |           |                |
| 814.784414 Kcal/mol 35.332441 eV -100.085238 H |           |           |           |                |
| Original2D_17_1.log                            |           |           |           |                |
| 6                                              | 0.918927  | -0.585922 | 0.000000  |                |
| 6                                              | -1.448272 | 0.543617  | -0.000000 |                |
| 6                                              | 1.167907  | 1.372341  | 0.000000  |                |
| 6                                              | 0.000000  | 0.594064  | -0.000000 |                |
| 6                                              | 2.123049  | 0.039741  | 0.000000  |                |
| 6                                              | -1.738003 | -0.878100 | -0.000000 |                |
| 12                                             | 3.329120  | -1.684717 | 0.000000  |                |
| 8                                              | -1.423607 | 2.800345  | -0.000000 |                |
| 6                                              | -2.212180 | -2.294959 | -0.000000 |                |
| 12                                             | 0.507835  | 3.403432  | -0.000000 |                |
| 6                                              | -1.545100 | 4.147732  | -0.000000 |                |
| 6                                              | -2.388979 | 1.617109  | -0.000000 |                |
| 6                                              | -2.586769 | -3.598468 | -0.000000 |                |
| 6                                              | -0.835836 | -1.843279 | 0.000000  |                |
| 6                                              | 2.093859  | -3.686754 | 0.000000  |                |
| 8                                              | 0.506723  | -1.948758 | 0.000000  |                |
| 16                                             |           |           |           |                |
| 822.973650 Kcal/mol 35.687560 eV -100.072188 H |           |           |           | MutI_13_69.log |

|            |                     |           |           |                              |
|------------|---------------------|-----------|-----------|------------------------------|
| 12         | 1.446150            | 0.317827  | -0.855872 |                              |
| 8          | -2.729095           | 1.182300  | -0.186392 |                              |
| 6          | 7.782115            | -0.420079 | 1.028502  |                              |
| 12         | -4.357427           | -0.720999 | 0.368444  |                              |
| 6          | -1.705973           | -2.036446 | -0.230090 |                              |
| 6          | 3.139861            | 0.330057  | -0.589912 |                              |
| 6          | -2.978447           | 4.245198  | 0.743916  |                              |
| 6          | -3.893761           | -2.498658 | 0.460648  |                              |
| 6          | -0.268029           | -0.043079 | -0.772375 |                              |
| 6          | 6.603041            | -0.243554 | 0.563485  |                              |
| 6          | 4.292757            | 0.140812  | -0.253938 |                              |
| 6          | -3.540337           | 0.902863  | -0.058671 |                              |
| 8          | 5.460790            | -0.056405 | 0.092356  |                              |
| 6          | -2.750371           | 3.034163  | 0.253002  |                              |
| 6          | -1.410419           | -0.578114 | -0.408190 |                              |
| 6          | -3.090145           | -3.528011 | 0.363860  |                              |
| 16         |                     |           |           |                              |
| 824.961600 | Kcal/mol            | 35.773766 | eV        | -100.069020 H MutI_8_73.log  |
| 6          | 12.882322           | -0.973900 | -0.548371 |                              |
| 6          | -5.190188           | -0.260699 | -1.261015 |                              |
| 12         | -0.563543           | -1.677424 | 0.192725  |                              |
| 6          | -0.382005           | 2.201785  | -0.025735 |                              |
| 6          | -1.957755           | -1.347275 | 1.596358  |                              |
| 12         | -2.970847           | 1.398640  | -0.805293 |                              |
| 6          | -4.149311           | -1.899261 | -0.967576 |                              |
| 6          | -1.470443           | 1.826433  | -0.342954 |                              |
| 8          | -4.395559           | 0.482472  | -1.137324 |                              |
| 6          | -1.964630           | -2.542919 | -0.617042 |                              |
| 6          | -0.815862           | -1.395720 | 2.284949  |                              |
| 6          | 14.232654           | -0.748557 | -1.000656 |                              |
| 6          | 0.664913            | -0.866627 | 1.103211  |                              |
| 6          | -2.657718           | -2.165212 | 0.517378  |                              |
| 6          | 1.892807            | 3.146088  | 1.270013  |                              |
| 8          | 1.383558            | 3.705103  | 0.549756  |                              |
| 16         |                     |           |           |                              |
| 825.630229 | Kcal/mol            | 35.802760 | eV        | -100.067954 H                |
|            | Original3D_13_5.log |           |           |                              |
| 6          | 1.618403            | -0.711242 | -0.007492 |                              |
| 12         | -0.094916           | 0.305802  | -0.826490 |                              |
| 6          | 1.695029            | 2.989603  | -1.307267 |                              |
| 6          | 2.402122            | 2.049538  | 0.356257  |                              |
| 6          | -3.073548           | -1.001417 | -0.362849 |                              |
| 6          | -2.364979           | 0.837817  | 0.328891  |                              |
| 6          | -1.707243           | 1.164777  | 1.509687  |                              |
| 6          | 1.524246            | -1.983568 | 0.560750  |                              |
| 6          | -3.586952           | 1.119900  | 1.029455  |                              |
| 6          | -2.990782           | 1.562548  | -1.030254 |                              |
| 6          | 1.161690            | 2.240231  | 0.911402  |                              |
| 6          | 2.319939            | -1.661984 | 1.632602  |                              |
| 8          | -3.082128           | -1.947798 | 0.151977  |                              |
| 6          | 2.436241            | 3.374450  | -0.242860 |                              |
| 8          | -0.785539           | -2.503063 | -1.058604 |                              |
| 12         | 2.956277            | -2.328887 | -0.258253 |                              |
| 16         |                     |           |           |                              |
| 829.237894 | Kcal/mol            | 35.959204 | eV        | -100.062205 H MutI_15_53.log |



|                                                |           |           |           |                |
|------------------------------------------------|-----------|-----------|-----------|----------------|
| 6                                              | 0.802890  | 2.077808  | 0.617147  |                |
| 6                                              | 3.010687  | -0.762617 | -0.023534 |                |
| 6                                              | -4.587937 | -1.878862 | 0.107057  |                |
| 6                                              | -0.463818 | 1.432817  | 0.107791  |                |
| 6                                              | 1.819207  | -0.959461 | -0.090864 |                |
| 6                                              | -2.019105 | -1.195716 | 0.085254  |                |
| 6                                              | -0.656113 | -1.241484 | -0.019426 |                |
| 6                                              | 0.570933  | -1.077069 | -0.064586 |                |
| 6                                              | -4.795206 | 0.685732  | -0.186595 |                |
| 6                                              | 6.797192  | 0.160036  | -0.078465 |                |
| 12                                             | 4.949502  | -0.340094 | -0.044382 |                |
| 8                                              | -1.570699 | 1.241024  | 0.105160  |                |
| 6                                              | 7.994990  | 0.431610  | -0.090607 |                |
| 12                                             | -3.301888 | 2.160273  | -0.244885 |                |
| 6                                              | -3.233567 | -2.223877 | 0.154325  |                |
| 8                                              | -4.830837 | -0.557980 | -0.059382 |                |
| 16                                             |           |           |           |                |
| 833.077720 Kcal/mol 36.125715 eV -100.056086 H |           |           |           | MutI_16_33.log |
| 6                                              | -5.233227 | -1.470864 | 0.711415  |                |
| 6                                              | 1.311682  | 1.662841  | -0.381885 |                |
| 6                                              | -2.660260 | 1.026261  | 0.496820  |                |
| 8                                              | -3.805644 | 0.664884  | 0.871192  |                |
| 6                                              | 4.388141  | -0.014886 | -0.039917 |                |
| 12                                             | -2.007992 | -1.866239 | -0.948394 |                |
| 6                                              | -3.880379 | -2.372538 | -0.350495 |                |
| 6                                              | -1.607094 | 0.646819  | -0.084210 |                |
| 12                                             | -0.282851 | 1.548162  | -0.213670 |                |
| 6                                              | 2.981165  | 0.700048  | -0.368740 |                |
| 6                                              | 6.559810  | -1.275027 | 0.411412  |                |
| 6                                              | -1.507103 | -0.508685 | -0.579757 |                |
| 8                                              | 0.511615  | 2.953950  | -0.288404 |                |
| 6                                              | 7.673461  | -1.904242 | 0.670418  |                |
| 6                                              | -4.690552 | -0.332937 | 0.841578  |                |
| 6                                              | 5.638080  | -0.345750 | 0.220439  |                |
| 16                                             |           |           |           |                |
| 836.497547 Kcal/mol 36.274013 eV -100.050636 H |           |           |           | MutI_9_67.log  |
| 12                                             | 4.583273  | -1.187635 | -0.434660 |                |
| 6                                              | 2.927703  | 3.035697  | 0.515193  |                |
| 6                                              | -6.525378 | 2.938124  | -0.765286 |                |
| 8                                              | 0.154149  | -2.235399 | -0.805768 |                |
| 6                                              | -5.913371 | 4.239184  | -0.890549 |                |
| 6                                              | 4.339440  | 0.845623  | -0.001329 |                |
| 6                                              | -0.988155 | -2.160615 | -0.485748 |                |
| 6                                              | -2.202357 | -2.035907 | -0.146153 |                |
| 8                                              | -4.609474 | -1.711825 | 0.668781  |                |
| 6                                              | 4.517570  | 2.062770  | 0.150400  |                |
| 6                                              | -5.838383 | -1.609042 | 1.019538  |                |
| 6                                              | -3.435385 | -1.871743 | 0.264945  |                |
| 12                                             | 1.689645  | 0.821859  | 0.508646  |                |
| 6                                              | 2.332963  | -1.695319 | -0.411100 |                |
| 6                                              | 3.170148  | -0.159051 | 0.151290  |                |
| 6                                              | 1.009801  | 2.404796  | 0.633477  |                |
| 16                                             |           |           |           |                |
| 839.025001 Kcal/mol 36.383613 eV -100.046608 H |           |           |           | Child_1_39.log |
| 6                                              | -1.680103 | -2.883775 | 0.055888  |                |

|    |           |           |           |
|----|-----------|-----------|-----------|
| 6  | -0.469731 | 3.488601  | -0.016247 |
| 6  | -4.504245 | -2.919295 | -0.926136 |
| 6  | 0.421144  | 2.572203  | -0.086558 |
| 6  | -2.767718 | -2.444593 | 0.077435  |
| 6  | -4.149544 | 2.853276  | 0.374209  |
| 6  | -4.038567 | -2.078854 | 0.017587  |
| 8  | -2.803964 | 2.423631  | 0.401044  |
| 12 | 0.660552  | -1.608190 | -0.164087 |
| 12 | 2.111990  | 1.583153  | -0.261498 |
| 6  | 4.329827  | -2.145883 | 1.294888  |
| 6  | -3.718657 | 1.327516  | 0.377416  |
| 6  | 3.597931  | -1.282824 | 0.598594  |
| 6  | 2.269569  | -0.694529 | 0.015493  |
| 6  | 3.562225  | -0.100096 | -0.205824 |
| 8  | 4.006055  | 0.845112  | -0.945224 |

16

839.556146 Kcal/mol 36.406646 eV -100.045762 H

Original3D\_0\_68.log

|    |           |           |           |
|----|-----------|-----------|-----------|
| 8  | -0.123104 | -1.033729 | -0.547179 |
| 6  | 0.360063  | -0.864041 | 2.078677  |
| 6  | 0.970345  | -2.097568 | 2.001295  |
| 6  | 2.175822  | 0.690592  | -1.009278 |
| 6  | -0.717431 | 0.018664  | 0.613124  |
| 12 | -2.507988 | -0.137887 | 1.291782  |
| 6  | 0.564573  | 0.076205  | -1.629266 |
| 6  | 0.841532  | -2.280879 | -1.367617 |
| 8  | 1.349759  | 1.379353  | 0.287375  |
| 12 | 1.722571  | -0.839536 | 0.460445  |
| 6  | -4.706166 | 1.294229  | -0.162736 |
| 6  | -1.282672 | 0.753952  | -1.050287 |
| 6  | -0.394838 | -2.358773 | -1.935014 |
| 6  | 2.519516  | 1.945622  | -0.231008 |
| 6  | 2.250513  | 3.048491  | 0.566650  |
| 6  | -2.645962 | 1.267520  | -1.032588 |

16

840.167508 Kcal/mol 36.433157 eV -100.044787 H

Original3D\_14\_5.log

|    |           |           |           |
|----|-----------|-----------|-----------|
| 6  | -0.143630 | -0.071520 | -0.600356 |
| 6  | -1.470013 | -0.025214 | -0.700699 |
| 6  | 1.284091  | -1.157427 | 1.541690  |
| 8  | 1.248414  | 0.032415  | -0.775703 |
| 6  | 1.228400  | -1.560137 | -0.150557 |
| 12 | 3.150254  | -1.072181 | 0.033878  |
| 6  | -1.716864 | 1.501239  | -0.866816 |
| 6  | 0.000737  | -1.260648 | 1.439587  |
| 6  | 3.785328  | 0.979153  | -0.299162 |
| 8  | -1.779016 | -1.562516 | -0.507734 |
| 6  | -0.555883 | 1.840410  | 0.056554  |
| 12 | -3.444664 | -0.080684 | -0.562624 |
| 6  | 3.741902  | 2.316414  | -0.015358 |
| 6  | -0.212856 | -1.527612 | -0.194167 |
| 6  | -4.265701 | 0.526893  | 1.608887  |
| 6  | -0.379222 | 2.784314  | 0.949139  |

16

840.477747 Kcal/mol 36.446611 eV -100.044293 H

Child\_18\_25.log

|            |           |              |                     |
|------------|-----------|--------------|---------------------|
| 12         | -7.864818 | -0.965053    | 0.131874            |
| 12         | 4.891827  | 0.659620     | 0.540362            |
| 6          | -2.187794 | -0.037551    | 1.118070            |
| 6          | -1.499510 | 0.746928     | 0.191979            |
| 6          | 3.640308  | -1.868851    | 0.248477            |
| 6          | -1.082956 | -0.535464    | 0.215588            |
| 8          | 2.891405  | -2.654520    | -0.183002           |
| 6          | -1.292482 | 3.300550     | -0.721365           |
| 6          | 1.946696  | 0.845839     | -0.174719           |
| 8          | -0.876681 | 1.952380     | -0.202620           |
| 6          | 1.435061  | 2.232584     | -0.298024           |
| 6          | -0.084766 | -1.386735    | -0.206399           |
| 6          | 0.596463  | 0.445423     | 0.034276            |
| 6          | 0.428751  | -2.572805    | -0.837329           |
| 6          | 0.089428  | 1.862932     | 0.012685            |
| 6          | 1.270486  | -1.485798    | -0.413548           |
| 16         |           |              |                     |
| 849.329816 | Kcal/mol  | 36.830473 eV | -100.030186 H       |
|            |           |              | MutI_16_57.log      |
| 6          | -0.554262 | -2.062036    | 0.109616            |
| 6          | 2.746626  | 1.841849     | 0.108241            |
| 6          | -0.598618 | -0.649832    | 0.024196            |
| 12         | 1.599053  | -0.852789    | -0.236327           |
| 6          | -3.659725 | -0.486232    | -0.190164           |
| 6          | -3.354758 | -1.666250    | -0.108259           |
| 6          | 0.185923  | 1.558486     | 0.127924            |
| 6          | -0.827817 | 0.617918     | -0.003628           |
| 8          | -1.935937 | -2.197104    | 0.256530            |
| 6          | -1.791370 | 3.717926     | 0.095541            |
| 12         | 2.855396  | -1.339316    | -0.260152           |
| 6          | 1.028336  | -2.937063    | 0.426720            |
| 6          | 1.375425  | 1.902376     | 0.109329            |
| 6          | -2.335243 | 2.408401     | -0.088791           |
| 8          | -2.026497 | 1.104283     | -0.097362           |
| 6          | 4.159828  | 1.595763     | 0.170009            |
| 16         |           |              |                     |
| 849.485919 | Kcal/mol  | 36.837242 eV | -100.029938 H       |
|            |           |              | Original3D_0_46.log |
| 6          | 0.094088  | 1.984736     | -0.849046           |
| 6          | 0.514579  | 0.402207     | -1.134154           |
| 8          | 1.546517  | -1.713911    | 0.466315            |
| 6          | -1.449761 | -0.473550    | -0.491288           |
| 6          | 2.479998  | -1.453300    | 0.994713            |
| 6          | 4.616837  | -0.743207    | 0.555565            |
| 6          | -2.969445 | -1.927377    | -0.234688           |
| 6          | -4.599411 | -1.437224    | 0.638603            |
| 6          | -2.116857 | -1.411461    | -1.267296           |
| 8          | -0.127827 | -0.660158    | 0.218944            |
| 12         | 2.827872  | -0.542074    | -1.049362           |
| 12         | 0.847675  | 1.100044     | 1.310651            |
| 6          | -1.809363 | 1.259564     | 0.046794            |
| 6          | -2.310571 | 1.530215     | 1.413001            |
| 6          | -3.129400 | 1.124336     | -0.483496           |
| 6          | 1.436628  | 3.194548     | -0.624965           |
| 16         |           |              |                     |
| 849.869223 | Kcal/mol  | 36.853864 eV | -100.029327 H       |
|            |           |              | Child_2_54.log      |

|    |           |           |           |
|----|-----------|-----------|-----------|
| 6  | -4.696883 | -2.573806 | 0.109570  |
| 12 | 0.334318  | 3.325229  | -0.707786 |
| 6  | 2.789738  | -3.199922 | 0.045515  |
| 8  | 0.828298  | 2.825019  | 1.178242  |
| 8  | 1.361748  | -2.207358 | 0.028417  |
| 6  | 0.896287  | 1.595225  | 0.935687  |
| 6  | 3.765530  | -2.124831 | -0.078996 |
| 12 | -5.565677 | -0.479020 | -0.008945 |
| 6  | 0.846643  | 1.261675  | -0.547963 |
| 6  | 0.344717  | -1.021279 | -0.021365 |
| 6  | 0.724190  | 0.327855  | 1.790480  |
| 6  | 2.778891  | -1.263475 | 0.005337  |
| 6  | -0.208905 | 0.836071  | -1.249832 |
| 6  | -3.571426 | -0.032252 | -0.058228 |
| 6  | 2.145126  | -0.206363 | -1.274283 |
| 6  | 1.728748  | -0.114865 | 0.168663  |

16

852.773410 Kcal/mol 36.979802 eV -100.024699 H

Original3D\_0\_66.log

|    |           |           |           |
|----|-----------|-----------|-----------|
| 6  | -0.195315 | -1.454937 | -0.302425 |
| 8  | 1.529951  | 0.058299  | 0.135522  |
| 6  | -1.722855 | -1.660749 | 0.416398  |
| 6  | -1.147019 | 0.958379  | 0.853988  |
| 6  | -2.694191 | 0.090533  | 0.188041  |
| 6  | -1.529168 | -2.895740 | -0.106274 |
| 6  | -0.292896 | 1.049985  | -1.729342 |
| 12 | 3.403898  | 0.194717  | 0.296005  |
| 6  | 2.242984  | -2.223873 | 2.130816  |
| 6  | 4.998210  | 1.254105  | -1.096924 |
| 6  | -4.214675 | 0.753051  | 0.434746  |
| 6  | -1.263242 | 2.268847  | 1.226208  |
| 8  | 0.627262  | 1.006976  | -0.914428 |
| 12 | -1.555906 | -0.835337 | -1.619553 |
| 6  | -1.447550 | 3.382848  | 1.011146  |
| 6  | 0.693450  | -1.661575 | 0.659259  |

16

853.376706 Kcal/mol 37.005963 eV -100.023737 H

MutI\_18\_45.log

|    |           |           |           |
|----|-----------|-----------|-----------|
| 6  | -0.745268 | 0.471098  | -0.026589 |
| 6  | 4.021260  | -0.960403 | -0.028730 |
| 8  | -0.092612 | -0.519137 | -0.029837 |
| 6  | 2.192751  | 2.411881  | -0.659884 |
| 6  | -3.780276 | -1.869860 | -0.312298 |
| 12 | 1.368994  | -0.995547 | -0.085815 |
| 8  | -5.034015 | 0.538540  | -0.550271 |
| 12 | -2.826643 | -2.748133 | 0.201864  |
| 6  | -3.318444 | 2.028831  | 1.010791  |
| 6  | 5.233830  | -0.604251 | 0.182970  |
| 6  | -0.271166 | 1.859861  | -0.028022 |
| 6  | 6.363395  | 0.009251  | 0.345917  |
| 6  | -2.122868 | 0.880576  | 0.208411  |
| 6  | 2.937155  | -1.236878 | -0.173205 |
| 6  | -1.687119 | 2.183193  | 0.321380  |
| 6  | 0.927551  | 2.288188  | -0.299361 |

16

856.308653 Kcal/mol 37.133105 eV -100.019065 H

Original1D\_8\_0.log

|    |          |          |            |
|----|----------|----------|------------|
| 6  | 0.000000 | 0.000000 | -5.704286  |
| 6  | 0.000000 | 0.000000 | -4.384286  |
| 8  | 0.000000 | 0.000000 | -3.064286  |
| 8  | 0.000000 | 0.000000 | -1.744286  |
| 6  | 0.000000 | 0.000000 | -7.024286  |
| 12 | 0.000000 | 0.000000 | -0.424286  |
| 6  | 0.000000 | 0.000000 | 2.215714   |
| 6  | 0.000000 | 0.000000 | 3.535714   |
| 6  | 0.000000 | 0.000000 | 4.855714   |
| 6  | 0.000000 | 0.000000 | 6.175714   |
| 6  | 0.000000 | 0.000000 | -8.344286  |
| 12 | 0.000000 | 0.000000 | 7.495714   |
| 6  | 0.000000 | 0.000000 | -9.664286  |
| 6  | 0.000000 | 0.000000 | 10.135714  |
| 6  | 0.000000 | 0.000000 | -10.984286 |
| 6  | 0.000000 | 0.000000 | 11.455714  |

16

864.445828 Kcal/mol 37.485966 eV -100.006097 H

MutI\_10\_69.log

|    |           |           |           |
|----|-----------|-----------|-----------|
| 8  | 1.601687  | -2.180939 | -0.397952 |
| 12 | 3.064997  | 1.138772  | -0.206204 |
| 6  | 0.711411  | 2.068836  | 0.056742  |
| 6  | -3.776291 | -2.018426 | 0.142992  |
| 6  | -3.860582 | -0.713533 | 0.121566  |
| 6  | 3.346262  | -2.022772 | 0.907798  |
| 6  | -3.587869 | 0.558773  | 0.096859  |
| 6  | -3.309306 | -3.207850 | -0.088395 |
| 6  | -2.932131 | 1.657700  | 0.063175  |
| 6  | 1.554423  | 0.179114  | 0.042993  |
| 6  | 3.611643  | -1.206225 | -0.090732 |
| 6  | 4.104972  | 0.261290  | 0.137213  |
| 6  | -0.927008 | 3.314284  | 0.135187  |
| 6  | -1.979130 | 2.573295  | 0.058786  |
| 8  | -0.211966 | -1.062222 | -0.222801 |
| 12 | -0.469674 | 0.301092  | -0.172054 |

16

867.102178 Kcal/mol 37.601157 eV -100.001864 H

MutI\_6\_73.log

|    |            |           |           |
|----|------------|-----------|-----------|
| 6  | 1.813443   | -1.506155 | -0.174849 |
| 8  | -13.837926 | -0.193882 | 0.914635  |
| 8  | -13.346167 | -0.223586 | -0.245171 |
| 6  | 0.488940   | -1.432504 | -0.316000 |
| 6  | -2.974385  | -0.105553 | -0.629942 |
| 6  | 3.441221   | 2.712010  | 0.170978  |
| 6  | 0.169821   | 1.129790  | -0.246437 |
| 12 | 5.456652   | 0.265404  | 0.303605  |
| 6  | 1.801794   | 1.513144  | -0.037665 |
| 6  | 6.921995   | -1.236933 | 0.402548  |
| 12 | 4.969563   | -1.218973 | 0.188773  |
| 6  | -1.967490  | 1.326808  | -0.449065 |
| 6  | 4.343296   | 1.945572  | 0.247351  |
| 6  | -0.141853  | -0.233733 | -0.331751 |
| 6  | 3.085260   | -1.583243 | -0.034950 |
| 6  | -1.589012  | -0.065442 | -0.477590 |

16

868.026047 Kcal/mol 37.641219 eV -100.000392 H MutI\_6\_65.log

|    |           |           |           |
|----|-----------|-----------|-----------|
| 6  | -2.378820 | -2.450133 | 0.735419  |
| 8  | 1.955777  | -1.148710 | 0.115090  |
| 6  | -0.705100 | 4.250411  | 0.319317  |
| 6  | 3.183776  | -1.345814 | -0.312975 |
| 6  | -3.467823 | -1.768491 | 0.289940  |
| 6  | -1.719045 | 0.695430  | -0.975254 |
| 6  | -3.603861 | -0.685121 | -0.330574 |
| 6  | 1.867168  | 2.176634  | -0.234744 |
| 6  | -1.090495 | -2.701213 | 0.939884  |
| 12 | -0.115548 | 0.154996  | -0.594291 |
| 8  | 2.862919  | 1.487168  | 1.071909  |
| 6  | 4.304300  | -1.956767 | -0.565790 |
| 6  | -1.894435 | 3.874365  | 0.762405  |
| 12 | 1.342512  | 0.416117  | -0.328905 |
| 6  | -0.174436 | -2.098260 | 0.542348  |
| 6  | -3.200088 | 0.415457  | -0.906249 |

16

872.176114 Kcal/mol 37.821184 eV -99.993778 H Child\_13\_23.log

|    |           |           |           |
|----|-----------|-----------|-----------|
| 8  | 5.527798  | -2.838397 | 0.004219  |
| 8  | -8.125582 | -1.358600 | -0.242231 |
| 6  | 4.720510  | -1.981714 | -0.024715 |
| 6  | -6.995125 | -1.113984 | 0.147121  |
| 6  | 3.758390  | -1.048005 | -0.039813 |
| 6  | -0.604620 | 2.663161  | -0.008898 |
| 12 | 1.545315  | -1.438289 | -0.074706 |
| 6  | -1.788941 | 2.068885  | 0.026973  |
| 6  | -5.706982 | -1.096650 | 0.499895  |
| 6  | -2.752695 | 1.189165  | -0.313389 |
| 6  | 4.066868  | 0.362146  | 0.057586  |
| 6  | 0.628066  | 2.333054  | 0.152588  |
| 6  | 3.116785  | 1.366299  | 0.314175  |
| 6  | 3.220687  | 2.541183  | -0.346229 |
| 12 | -1.466189 | -0.183257 | -0.113779 |
| 6  | 1.642518  | 1.555548  | 0.229025  |

16

877.068367 Kcal/mol 38.033332 eV -99.985982 H Child\_10\_44.log

|    |           |           |           |
|----|-----------|-----------|-----------|
| 6  | -5.306330 | -1.421471 | -0.128247 |
| 12 | 5.809956  | -1.959500 | -0.130505 |
| 6  | -4.762760 | -0.297641 | -0.127422 |
| 6  | 4.059033  | -1.018217 | 0.049361  |
| 6  | -3.931968 | 0.753081  | -0.105696 |
| 6  | 2.566141  | 0.178694  | 0.175808  |
| 12 | -3.690037 | -2.523412 | 0.100918  |
| 6  | 1.531952  | 0.956486  | 0.211862  |
| 6  | -2.929628 | 1.444358  | -0.068391 |
| 6  | -1.710414 | 1.889460  | -0.027960 |
| 6  | 0.144645  | -0.262069 | 0.019005  |
| 6  | -1.040148 | -2.081406 | 0.194439  |
| 6  | -0.091255 | 4.731214  | 0.013143  |
| 6  | -0.320243 | 2.316621  | 0.026557  |
| 8  | 3.152478  | 2.811015  | -0.025381 |
| 8  | 2.510875  | -1.478483 | -0.104583 |

16

902.520957 Kcal/mol 39.137062 eV -99.945421 H Original3D\_7\_3.log

|                                                               |           |           |           |
|---------------------------------------------------------------|-----------|-----------|-----------|
| 12                                                            | 1.546792  | 1.015983  | -0.447043 |
| 8                                                             | -0.554560 | -1.116663 | -0.858083 |
| 6                                                             | -0.209418 | -0.684705 | 1.552012  |
| 6                                                             | 3.491947  | -1.480671 | -0.616448 |
| 6                                                             | -0.072190 | 3.690911  | -0.724225 |
| 6                                                             | -1.675379 | 0.542454  | -1.688979 |
| 6                                                             | 1.378838  | -0.535926 | 1.612856  |
| 6                                                             | 2.405620  | -1.913464 | -1.106502 |
| 6                                                             | 2.310285  | 0.758940  | 2.737028  |
| 6                                                             | 0.098065  | -1.612785 | 0.291707  |
| 12                                                            | -2.496126 | -0.746263 | -0.111837 |
| 8                                                             | 0.251250  | 3.584955  | -1.720961 |
| 6                                                             | 1.692343  | -2.674751 | -1.698237 |
| 6                                                             | 0.916937  | 0.788843  | 2.509066  |
| 6                                                             | -3.189950 | 0.859162  | 1.934285  |
| 6                                                             | -4.844016 | -1.568507 | -0.246077 |
| 16                                                            |           |           |           |
| 903.830677 Kcal/mol 39.193857 eV -99.943334 H MutI_1_77.log   |           |           |           |
| 8                                                             | -5.132426 | -0.800260 | 0.006774  |
| 6                                                             | -3.286105 | 1.895815  | 2.716349  |
| 12                                                            | 1.260529  | -0.716955 | -0.694255 |
| 6                                                             | -2.800954 | 0.876708  | -0.255272 |
| 8                                                             | -0.279247 | -1.481583 | 0.319499  |
| 6                                                             | 2.978632  | 0.630930  | -0.280860 |
| 6                                                             | 5.565883  | -1.873648 | 0.644727  |
| 12                                                            | 1.457202  | 3.050466  | 0.373427  |
| 6                                                             | -0.406861 | 1.280240  | -1.018886 |
| 6                                                             | -2.081359 | 0.957724  | -1.323777 |
| 6                                                             | 2.577743  | 1.259690  | -1.796255 |
| 6                                                             | 3.091757  | -0.860973 | 0.871208  |
| 6                                                             | 4.329451  | -1.423282 | 0.788701  |
| 6                                                             | -2.512300 | -1.320198 | 1.194576  |
| 6                                                             | -1.653881 | -1.418432 | -0.306073 |
| 6                                                             | -4.021906 | -1.629138 | -1.027813 |
| 16                                                            |           |           |           |
| 904.014932 Kcal/mol 39.201847 eV -99.943040 H Child_5_44.log  |           |           |           |
| 8                                                             | 6.464849  | -0.972776 | -0.221674 |
| 6                                                             | -0.990535 | -1.239270 | 1.184975  |
| 6                                                             | 5.458990  | -0.365255 | -0.151320 |
| 6                                                             | -2.146226 | -1.039464 | 0.618862  |
| 6                                                             | 4.372354  | 0.311072  | -0.076835 |
| 12                                                            | -4.066883 | -1.829826 | -0.352864 |
| 6                                                             | 3.243147  | 0.857371  | -0.010949 |
| 6                                                             | -4.103861 | 0.373854  | -0.272878 |
| 6                                                             | 2.096785  | 1.476454  | 0.062115  |
| 6                                                             | -2.787292 | 0.300414  | 0.171339  |
| 6                                                             | 0.906222  | 1.892159  | 0.116044  |
| 6                                                             | -4.934032 | 1.309449  | -0.603148 |
| 8                                                             | 1.494010  | -1.383930 | -0.218260 |
| 6                                                             | 0.352809  | -1.014512 | -0.180252 |
| 6                                                             | -1.548219 | 0.695475  | 0.270011  |
| 12                                                            | -1.199094 | 1.622090  | 0.082173  |
| 16                                                            |           |           |           |
| 906.278222 Kcal/mol 39.299993 eV -99.939433 H Child_15_16.log |           |           |           |
| 12                                                            | -2.336998 | -2.616004 | 0.006851  |

|                                                               |           |           |           |
|---------------------------------------------------------------|-----------|-----------|-----------|
| 6                                                             | 1.950370  | 3.199504  | 0.116447  |
| 6                                                             | -0.336335 | -2.023016 | 0.122099  |
| 6                                                             | -3.451619 | 3.739489  | -0.019283 |
| 6                                                             | 0.906298  | -1.872857 | 0.105346  |
| 6                                                             | 5.365964  | 0.242365  | -0.086451 |
| 6                                                             | 2.242340  | -1.683844 | 0.074607  |
| 6                                                             | -3.137120 | 2.486493  | -0.018178 |
| 6                                                             | -4.238377 | -2.186337 | -0.184245 |
| 12                                                            | 3.128577  | 0.603123  | -0.039138 |
| 6                                                             | -2.242479 | 1.290735  | 0.070214  |
| 6                                                             | 4.704209  | -0.842005 | -0.044723 |
| 6                                                             | -4.268237 | -0.913239 | -0.059353 |
| 8                                                             | -3.561733 | 0.883276  | 0.070556  |
| 6                                                             | 3.452228  | -1.399733 | 0.007509  |
| 8                                                             | 1.663933  | 2.107878  | -0.085117 |
| 16                                                            |           |           |           |
| 913.622214 Kcal/mol 39.618459 eV -99.927730 H MutI_15_49.log  |           |           |           |
| 6                                                             | 3.739601  | -0.748208 | 0.000000  |
| 6                                                             | 0.451907  | -2.790441 | 0.000000  |
| 6                                                             | 1.010598  | 2.041102  | 0.000000  |
| 12                                                            | -4.318934 | 1.341245  | 0.000000  |
| 6                                                             | 0.209477  | 3.330671  | 0.000000  |
| 6                                                             | 0.000000  | -1.247063 | 0.000000  |
| 6                                                             | -3.190675 | -0.347480 | 0.000000  |
| 6                                                             | -0.524451 | 2.273377  | 0.000000  |
| 6                                                             | 1.816146  | 0.744870  | 0.000000  |
| 6                                                             | 1.171147  | -0.590121 | 0.000000  |
| 12                                                            | -1.269505 | 0.198782  | 0.000000  |
| 8                                                             | -2.210015 | 1.988676  | 0.000000  |
| 6                                                             | 3.570550  | -2.116485 | 0.000000  |
| 6                                                             | 3.164015  | 0.394256  | 0.000000  |
| 8                                                             | 2.137064  | -2.005221 | 0.000000  |
| 6                                                             | -0.144169 | -4.002474 | 0.000000  |
| 16                                                            |           |           |           |
| 916.758000 Kcal/mol 39.754440 eV -99.922733 H Child_18_22.log |           |           |           |
| 6                                                             | -1.589161 | 3.968356  | 0.464579  |
| 6                                                             | 6.749664  | 1.027088  | -0.423423 |
| 6                                                             | -1.953141 | 2.731606  | 0.195922  |
| 6                                                             | 5.479860  | 0.696514  | -0.186831 |
| 6                                                             | -2.540639 | 1.453533  | 0.082191  |
| 6                                                             | 4.244031  | 0.402806  | 0.025167  |
| 6                                                             | -3.742443 | 0.786156  | 0.010275  |
| 8                                                             | 1.832877  | -2.202364 | 0.406184  |
| 6                                                             | -1.078351 | 1.372369  | -0.029458 |
| 12                                                            | 2.026911  | -0.151363 | 0.234051  |
| 6                                                             | -3.918820 | -0.496734 | -0.155905 |
| 6                                                             | 0.587979  | -2.540120 | 0.315930  |
| 8                                                             | -4.026684 | -1.699554 | -0.284436 |
| 6                                                             | -0.663876 | -2.815307 | 0.301012  |
| 12                                                            | -1.137682 | -0.975384 | -0.365891 |
| 6                                                             | -0.428486 | 0.869784  | -0.498108 |
| 16                                                            |           |           |           |
| 917.749727 Kcal/mol 39.797445 eV -99.921152 H MutI_11_77.log  |           |           |           |
| 6                                                             | 3.643553  | -2.229463 | -0.159377 |
| 6                                                             | 2.039195  | -1.708575 | 0.188048  |



|    |           |           |           |
|----|-----------|-----------|-----------|
| 6  | -2.169449 | -0.526729 | -0.392362 |
| 8  | -7.111639 | 0.745237  | 0.015846  |
| 6  | 5.781856  | 0.149694  | -0.260851 |
| 12 | 1.175811  | 2.508041  | 0.118846  |
| 6  | 1.426203  | -0.053626 | -0.539773 |
| 6  | -4.639356 | 0.109796  | -0.341087 |
| 6  | 3.677320  | 1.351065  | -0.024254 |
| 6  | -5.845206 | 0.423275  | -0.191614 |
| 6  | -3.368297 | -0.233116 | -0.460120 |
| 6  | 4.763953  | 0.816823  | -0.134038 |
| 6  | 2.408316  | 2.338038  | 0.182463  |
| 12 | -0.537732 | -1.223860 | 1.375188  |
| 6  | 1.298746  | -2.724972 | -0.798704 |
| 8  | -0.608105 | -0.955664 | -0.058144 |

16

921.556368 Kcal/mol 39.962517 eV -99.915086 H MutI\_17\_75.log

|    |           |           |           |
|----|-----------|-----------|-----------|
| 6  | -4.417749 | -0.166402 | -0.913368 |
| 8  | -3.486115 | 1.743941  | -0.563046 |
| 6  | 1.972162  | -1.442343 | 1.153101  |
| 6  | -0.237913 | 1.312416  | 0.050513  |
| 6  | -0.680267 | -1.465274 | 0.931954  |
| 6  | 2.999033  | 2.133583  | 0.304444  |
| 6  | 4.870603  | -2.791127 | -0.785094 |
| 6  | 4.149321  | 2.308042  | 0.152310  |
| 6  | -1.682912 | -0.649633 | 0.418753  |
| 6  | -1.332301 | 0.853498  | 0.052496  |
| 6  | -2.402143 | 1.593770  | -0.265810 |
| 6  | 0.577691  | -1.407168 | 1.068916  |
| 6  | -3.000525 | -0.845490 | 0.068402  |
| 12 | 1.321415  | 1.846284  | 0.150749  |
| 8  | -6.777155 | -2.037026 | -0.155385 |
| 12 | 5.113265  | -1.367829 | -0.790103 |

16

921.572705 Kcal/mol 39.963225 eV -99.915060 H Original3D\_5\_3.log

|    |           |           |           |
|----|-----------|-----------|-----------|
| 6  | -0.019920 | 0.390256  | -0.849511 |
| 12 | 1.274094  | -1.339254 | -0.522311 |
| 6  | 1.667774  | 0.937485  | 0.953598  |
| 6  | -1.259106 | -1.630571 | 0.235016  |
| 6  | 4.029448  | -1.612327 | -0.061163 |
| 6  | -0.029534 | 1.691208  | -0.032076 |
| 8  | 1.600608  | 1.862476  | -0.346917 |
| 6  | -0.047661 | 2.887611  | 0.899444  |
| 6  | 0.662519  | -1.583626 | 2.652118  |
| 6  | -2.638798 | -1.507207 | 0.491668  |
| 6  | -3.937817 | 0.209379  | 0.277757  |
| 6  | 0.181156  | 0.825169  | 1.398049  |
| 8  | -3.194378 | -0.709547 | -0.734523 |
| 12 | -1.784257 | 0.405701  | -0.335748 |
| 6  | 0.627915  | 0.069789  | -2.460980 |
| 6  | 3.909378  | -0.347300 | -0.345880 |

16

923.446314 Kcal/mol 40.044473 eV -99.912074 H Original1D\_1\_0.log

|    |          |          |           |
|----|----------|----------|-----------|
| 6  | 0.000000 | 0.000000 | 8.655127  |
| 12 | 0.000000 | 0.000000 | 10.109839 |
| 6  | 0.000000 | 0.000000 | 7.380494  |

|                                                               |           |           |            |
|---------------------------------------------------------------|-----------|-----------|------------|
| 6                                                             | 0.000000  | 0.000000  | 6.060454   |
| 6                                                             | 0.000000  | 0.000000  | 4.760602   |
| 6                                                             | 0.000000  | 0.000000  | 3.430429   |
| 6                                                             | 0.000000  | 0.000000  | 2.124368   |
| 6                                                             | 0.000000  | 0.000000  | 0.780548   |
| 6                                                             | 0.000000  | 0.000000  | -0.517245  |
| 8                                                             | 0.000000  | 0.000000  | -1.834519  |
| 6                                                             | 0.000000  | 0.000000  | -3.170603  |
| 6                                                             | 0.000000  | 0.000000  | -4.448842  |
| 8                                                             | 0.000000  | 0.000000  | -5.741867  |
| 6                                                             | 0.000000  | 0.000000  | -7.066159  |
| 12                                                            | 0.000000  | 0.000000  | -8.523882  |
| 6                                                             | 0.000000  | 0.000000  | -11.059237 |
| 16                                                            |           |           |            |
| 923.561061 Kcal/mol 40.049449 eV -99.911891 H MutI_16_47.log  |           |           |            |
| 6                                                             | 3.855376  | 0.053340  | -0.668895  |
| 12                                                            | 5.237603  | 0.375237  | -0.873969  |
| 8                                                             | -4.967871 | 0.315982  | -0.421173  |
| 6                                                             | 0.929400  | 0.105454  | 2.884319   |
| 12                                                            | -1.319741 | 2.197412  | -0.221652  |
| 6                                                             | -3.353721 | 2.562674  | -0.534463  |
| 6                                                             | 1.406750  | -0.655820 | -0.428544  |
| 6                                                             | -0.470160 | 1.125270  | -0.314485  |
| 6                                                             | 2.675052  | -0.276303 | -0.562948  |
| 6                                                             | -1.610513 | -2.008921 | 0.028381   |
| 6                                                             | -2.886313 | -1.715613 | 0.053334   |
| 6                                                             | -4.163733 | -1.460199 | 0.040774   |
| 8                                                             | -0.464347 | -1.392132 | -0.222749  |
| 6                                                             | 0.937432  | -2.006116 | -0.328437  |
| 6                                                             | 1.987981  | 0.603280  | 3.229910   |
| 6                                                             | 0.099682  | -0.037479 | -0.349140  |
| 16                                                            |           |           |            |
| 923.765729 Kcal/mol 40.058324 eV -99.911565 H Child_11_61.log |           |           |            |
| 6                                                             | 7.394759  | 1.766361  | 0.299323   |
| 6                                                             | -3.135043 | 2.407026  | -0.506460  |
| 8                                                             | 6.507473  | 1.035178  | 0.327683   |
| 6                                                             | -3.433138 | 1.099120  | -0.642463  |
| 12                                                            | 1.519948  | -1.870824 | -0.749391  |
| 6                                                             | -2.060711 | 2.981982  | -0.031395  |
| 8                                                             | 0.550620  | -3.343460 | 0.108160   |
| 6                                                             | -3.605709 | -0.161506 | -0.744147  |
| 6                                                             | 1.388505  | 0.084168  | -1.202358  |
| 6                                                             | -0.378012 | -2.498470 | 0.492078   |
| 6                                                             | -0.952754 | 3.468823  | 0.359276   |
| 6                                                             | 0.432539  | 0.440088  | -0.480351  |
| 6                                                             | -2.503467 | -0.030224 | 2.280922   |
| 6                                                             | -1.086658 | -1.522249 | 0.658844   |
| 12                                                            | -1.892154 | -1.038318 | 0.108060   |
| 6                                                             | -0.726691 | 0.860873  | 0.218269   |
| 16                                                            |           |           |            |
| 932.335323 Kcal/mol 40.429937 eV -99.897909 H MutI_11_73.log  |           |           |            |
| 6                                                             | 2.718492  | -2.851285 | -0.068896  |
| 12                                                            | 4.126901  | -1.913648 | 0.225927   |
| 6                                                             | 1.469129  | 3.562061  | 0.120381   |
| 6                                                             | 3.190226  | 0.800215  | 0.161449   |

|    |           |           |           |
|----|-----------|-----------|-----------|
| 6  | -4.620154 | -1.701003 | -0.260424 |
| 6  | -0.942373 | 5.418514  | -0.188487 |
| 6  | 1.523964  | -3.073197 | -0.300969 |
| 12 | 3.791534  | -0.682084 | 0.231846  |
| 6  | -0.312649 | -3.270478 | -0.440098 |
| 8  | -2.371339 | -2.735327 | -0.533123 |
| 8  | -1.935428 | 6.081795  | -0.351236 |
| 6  | -6.793208 | -1.056747 | 1.071273  |
| 6  | 0.192260  | 4.685489  | 0.001696  |
| 6  | -5.683823 | -1.413291 | 0.430513  |
| 6  | 2.651917  | 1.869783  | 0.167405  |
| 6  | -3.488295 | -2.240552 | -0.430244 |

16

939.338334 Kcal/mol 40.733617 eV -99.886749 H MutI\_18\_77.log

|    |           |           |           |
|----|-----------|-----------|-----------|
| 8  | -0.551807 | -1.288812 | -0.223290 |
| 8  | -1.732317 | 0.701497  | 2.762481  |
| 6  | 0.208072  | 3.746462  | 0.019564  |
| 6  | 1.954208  | -1.650069 | -0.020650 |
| 6  | -0.283154 | 2.683619  | -0.179861 |
| 12 | 3.056187  | -0.045075 | -0.310174 |
| 6  | -2.809105 | -1.751777 | -1.074470 |
| 6  | 0.251250  | -0.343425 | -0.428868 |
| 6  | -1.041760 | -2.401351 | 0.017390  |
| 6  | 4.425228  | 0.856489  | -0.329000 |
| 6  | -2.459531 | 0.767888  | -1.173309 |
| 6  | -0.872665 | -0.050933 | 2.817389  |
| 12 | -0.788694 | 1.159855  | -0.630469 |
| 6  | 1.051785  | -2.748209 | 0.768506  |
| 6  | -3.209511 | -0.068731 | -1.536038 |
| 6  | 1.295695  | -0.486434 | -0.384953 |

16

946.348730 Kcal/mol 41.037617 eV -99.875577 H Child\_12\_32.log

|    |            |           |           |
|----|------------|-----------|-----------|
| 12 | 8.365407   | -0.288791 | -0.048411 |
| 6  | -1.741955  | 6.427647  | -0.621939 |
| 6  | 6.477047   | -0.524751 | 0.014980  |
| 6  | -2.129272  | 5.164676  | -0.295287 |
| 6  | 5.188488   | -0.685762 | 0.058237  |
| 6  | -2.464286  | 3.908050  | -0.029999 |
| 6  | 3.894177   | -0.847493 | 0.101686  |
| 6  | -2.724478  | 2.739050  | 0.330283  |
| 12 | 1.968826   | -1.088075 | 0.166319  |
| 6  | -0.095368  | -1.346006 | 0.235613  |
| 6  | -3.319390  | -1.627244 | -2.101944 |
| 8  | -1.357547  | -1.503721 | 0.277983  |
| 6  | -3.361096  | -2.889465 | -2.209412 |
| 6  | -2.622999  | -1.661845 | 0.320464  |
| 6  | -2.400605  | -0.425158 | 2.825821  |
| 8  | -10.168999 | -2.604755 | 0.573779  |

16

947.340419 Kcal/mol 41.080620 eV -99.873996 H Original3D\_0\_36.log

|    |           |           |           |
|----|-----------|-----------|-----------|
| 6  | 1.823708  | -2.130468 | -0.093380 |
| 6  | 1.246941  | -0.563250 | 0.736161  |
| 12 | -0.248883 | -1.623103 | -0.417714 |
| 8  | 3.250060  | -1.778998 | -0.386851 |
| 6  | -2.157607 | -0.175237 | -0.891803 |

|                                                                   |           |           |           |
|-------------------------------------------------------------------|-----------|-----------|-----------|
| 6                                                                 | -2.952000 | -0.766732 | -0.197261 |
| 6                                                                 | 2.475396  | -0.626346 | -0.947868 |
| 8                                                                 | -1.063348 | 1.145429  | -0.345965 |
| 6                                                                 | -1.605547 | 2.664230  | 0.114947  |
| 6                                                                 | -4.045787 | -0.865422 | 0.277018  |
| 6                                                                 | 4.245654  | -0.563362 | 0.405422  |
| 12                                                                | 1.880865  | 1.372254  | -0.218601 |
| 6                                                                 | -3.188979 | 2.718189  | -1.070604 |
| 6                                                                 | 0.430694  | -0.404710 | 1.573524  |
| 6                                                                 | 2.624770  | 3.807847  | 1.075431  |
| 6                                                                 | -5.076821 | -1.748281 | 1.268132  |
| 16                                                                |           |           |           |
| 951.548475 Kcal/mol 41.263099 eV -99.867290 H Original3D_8_5.log  |           |           |           |
| 6                                                                 | -1.182664 | -1.055498 | 0.147153  |
| 6                                                                 | -1.526090 | -1.046303 | -1.235674 |
| 8                                                                 | -2.090260 | 0.747047  | -1.049347 |
| 6                                                                 | -2.657710 | -1.648955 | 0.521117  |
| 6                                                                 | 0.644545  | -0.195549 | -0.182724 |
| 8                                                                 | 0.107364  | -1.595727 | -0.079367 |
| 6                                                                 | 1.009797  | -0.030746 | 1.158824  |
| 6                                                                 | 1.724322  | 1.040439  | 2.015591  |
| 6                                                                 | -2.540279 | 2.448009  | 0.388158  |
| 12                                                                | 1.532886  | -0.774210 | -1.854632 |
| 6                                                                 | 3.055716  | 1.738990  | 0.462153  |
| 12                                                                | 1.662336  | -1.979285 | 0.981519  |
| 6                                                                 | -1.523462 | 0.838956  | 1.587121  |
| 6                                                                 | 4.390667  | 2.393791  | -1.189088 |
| 6                                                                 | -3.319403 | 1.335788  | -0.734303 |
| 6                                                                 | -1.822024 | 0.819642  | 0.312850  |
| 16                                                                |           |           |           |
| 951.648461 Kcal/mol 41.267435 eV -99.867131 H Original2D_12_2.log |           |           |           |
| 6                                                                 | 1.375225  | -0.839527 | -0.000000 |
| 8                                                                 | 0.133396  | 0.720348  | -0.000000 |
| 6                                                                 | -0.000000 | -0.647277 | 0.000000  |
| 6                                                                 | 2.826855  | -2.358485 | -0.000000 |
| 6                                                                 | -1.327227 | 0.821653  | 0.000000  |
| 6                                                                 | -1.427245 | -0.523498 | 0.000000  |
| 6                                                                 | 1.579629  | 0.836943  | -0.000000 |
| 8                                                                 | 1.370634  | -2.453400 | -0.000000 |
| 6                                                                 | 1.775237  | 2.147123  | -0.000000 |
| 6                                                                 | -1.387017 | -1.763268 | 0.000000  |
| 6                                                                 | -2.522158 | 2.067898  | 0.000000  |
| 12                                                                | -1.417901 | -3.561849 | 0.000000  |
| 6                                                                 | -1.268458 | 2.244442  | 0.000000  |
| 6                                                                 | 2.907613  | -0.856467 | -0.000000 |
| 6                                                                 | 3.039052  | 0.642774  | -0.000000 |
| 12                                                                | -2.370539 | 3.831061  | 0.000000  |
| 16                                                                |           |           |           |
| 951.925944 Kcal/mol 41.279468 eV -99.866689 H MutI_14_67.log      |           |           |           |
| 6                                                                 | 1.876243  | 2.931670  | 0.000000  |
| 6                                                                 | 2.745712  | 1.776739  | 0.000000  |
| 6                                                                 | 3.708249  | -1.720266 | 0.000000  |
| 8                                                                 | 1.354354  | -1.133247 | 0.000000  |
| 6                                                                 | 0.169835  | -3.283995 | 0.000000  |
| 6                                                                 | 2.659151  | -0.842009 | 0.000000  |

|    |           |           |           |
|----|-----------|-----------|-----------|
| 8  | 2.979278  | 0.517688  | 0.000000  |
| 6  | 1.115043  | -2.570381 | 0.000000  |
| 6  | 2.426520  | 4.225804  | -0.000000 |
| 6  | -3.560311 | 0.486410  | -0.000000 |
| 6  | -5.784726 | 1.633354  | -0.000000 |
| 12 | -1.915838 | -0.271743 | -0.000000 |
| 12 | -1.662357 | -2.577283 | -0.000000 |
| 6  | 0.000000  | 0.909792  | -0.000000 |
| 6  | -4.624587 | 1.009373  | -0.000000 |
| 6  | 0.647085  | 1.962305  | -0.000000 |

16

956.477270 Kcal/mol 41.476832 eV -99.859436 H MutI\_7\_71.log

|    |           |           |          |
|----|-----------|-----------|----------|
| 6  | 4.037711  | -1.945621 | 0.000000 |
| 6  | 1.791684  | 2.202105  | 0.000000 |
| 6  | 1.372221  | 0.854383  | 0.000000 |
| 8  | -3.118019 | -0.344748 | 0.000000 |
| 12 | -0.142897 | 3.153063  | 0.000000 |
| 6  | -2.032663 | -3.503688 | 0.000000 |
| 8  | -0.625435 | -0.742287 | 0.000000 |
| 6  | 0.000000  | 0.496425  | 0.000000 |
| 12 | -3.709187 | -2.028612 | 0.000000 |
| 6  | -1.096481 | 1.414283  | 0.000000 |
| 6  | 3.379029  | -0.854186 | 0.000000 |
| 6  | 3.216089  | 1.779489  | 0.000000 |
| 6  | 4.344816  | 2.466654  | 0.000000 |
| 6  | -3.174896 | -4.236756 | 0.000000 |
| 6  | -1.880721 | 0.218040  | 0.000000 |
| 6  | 2.738651  | 0.309351  | 0.000000 |

16

958.896787 Kcal/mol 41.581753 eV -99.855580 H Original3D\_7\_5.log

|    |           |           |           |
|----|-----------|-----------|-----------|
| 6  | 2.892407  | 1.262759  | 0.867462  |
| 6  | 1.220804  | 0.870029  | 0.027393  |
| 6  | 0.946309  | -0.038245 | 0.973096  |
| 6  | -0.402416 | 0.452011  | -0.810790 |
| 8  | 1.831693  | -1.404388 | -0.023787 |
| 12 | 1.966704  | -1.411805 | 1.828244  |
| 12 | -2.263268 | -0.855025 | -0.721983 |
| 6  | -2.724404 | 1.286638  | 1.206598  |
| 6  | -1.270491 | 1.719130  | 0.195592  |
| 8  | 1.741292  | -1.287522 | -1.990894 |
| 6  | -5.356130 | -1.721514 | -0.548813 |
| 6  | -0.978112 | 2.630775  | -0.724226 |
| 6  | -4.602182 | -0.017104 | 1.298886  |
| 6  | 2.506576  | 0.408672  | -0.080242 |
| 6  | 2.119815  | -0.514640 | -1.010269 |
| 6  | 1.476970  | 1.784363  | -0.920968 |

16

965.835687 Kcal/mol 41.882652 eV -99.844522 H Original2D\_0\_23.log

|    |           |           |          |
|----|-----------|-----------|----------|
| 12 | -0.754286 | 0.141429  | 0.000000 |
| 8  | -2.074286 | 2.781429  | 0.000000 |
| 6  | 1.885714  | -1.178571 | 0.000000 |
| 6  | 1.885714  | 0.141429  | 0.000000 |
| 6  | 3.205714  | 0.141429  | 0.000000 |
| 8  | -0.754286 | -2.498571 | 0.000000 |
| 6  | 4.525714  | -1.178571 | 0.000000 |

|                                                                   |           |           |           |
|-------------------------------------------------------------------|-----------|-----------|-----------|
| 6                                                                 | 1.885714  | -2.498571 | 0.000000  |
| 12                                                                | -3.394286 | 4.101429  | 0.000000  |
| 6                                                                 | 4.525714  | 0.141429  | 0.000000  |
| 6                                                                 | 3.205714  | -1.178571 | 0.000000  |
| 6                                                                 | -3.394286 | 1.461429  | 0.000000  |
| 6                                                                 | -2.074286 | -3.818571 | 0.000000  |
| 6                                                                 | -0.754286 | 5.421429  | 0.000000  |
| 6                                                                 | -0.754286 | -3.818571 | 0.000000  |
| 6                                                                 | -2.074286 | -2.498571 | 0.000000  |
| 16                                                                |           |           |           |
| 967.632795 Kcal/mol 41.960582 eV -99.841658 H Original3D_0_61.log |           |           |           |
| 6                                                                 | -0.712922 | -0.450543 | -0.910446 |
| 6                                                                 | -2.632677 | -1.618136 | -0.895948 |
| 12                                                                | -0.656613 | 1.326446  | 0.243222  |
| 6                                                                 | -1.622110 | 0.273961  | -2.475933 |
| 12                                                                | 2.234619  | 1.488826  | -1.184318 |
| 8                                                                 | 2.886373  | -1.278967 | -0.421558 |
| 6                                                                 | 0.953554  | 3.428284  | -0.982841 |
| 6                                                                 | -1.767736 | -0.781034 | -1.931493 |
| 6                                                                 | -1.246427 | -1.062857 | 1.684066  |
| 6                                                                 | -1.878380 | 3.271734  | 1.998880  |
| 6                                                                 | -3.571949 | 0.696720  | 1.240029  |
| 6                                                                 | -0.562030 | -0.542442 | 2.708961  |
| 8                                                                 | 4.041858  | -0.764082 | 0.716277  |
| 6                                                                 | -0.768997 | -1.972627 | 0.221637  |
| 6                                                                 | -1.787335 | -2.829546 | -0.637826 |
| 6                                                                 | 3.203356  | -1.319995 | 1.470147  |
| 16                                                                |           |           |           |
| 974.190749 Kcal/mol 42.244962 eV -99.831208 H Original3D_10_4.log |           |           |           |
| 12                                                                | 3.160422  | 0.474204  | 1.721397  |
| 6                                                                 | 0.737041  | -0.419263 | 1.175010  |
| 6                                                                 | 1.008907  | -0.367372 | -0.115648 |
| 6                                                                 | 0.561364  | 0.873650  | -0.160023 |
| 6                                                                 | 0.244759  | -2.055128 | -0.344465 |
| 6                                                                 | 1.456450  | -1.608394 | -0.071272 |
| 6                                                                 | -1.414474 | -1.260840 | -0.662035 |
| 6                                                                 | -2.133883 | -0.071709 | 0.584247  |
| 6                                                                 | -1.142608 | -1.208949 | -1.952692 |
| 6                                                                 | -2.450488 | -3.000487 | 0.399804  |
| 6                                                                 | 1.280773  | -0.315481 | -1.406305 |
| 8                                                                 | 3.256612  | 1.819009  | -0.904293 |
| 12                                                                | -2.309560 | 1.221204  | -0.750786 |
| 6                                                                 | -4.688203 | 3.204624  | 0.177926  |
| 8                                                                 | -2.405750 | -0.123600 | 1.874904  |
| 6                                                                 | 3.704154  | 0.577987  | -0.859917 |
| 16                                                                |           |           |           |
| 974.727902 Kcal/mol 42.268256 eV -99.830352 H MutI_7_73.log       |           |           |           |
| 6                                                                 | -0.678180 | -1.161477 | -0.028686 |
| 6                                                                 | 3.912116  | 1.201553  | 0.015003  |
| 6                                                                 | 5.448324  | -1.479848 | 0.019260  |
| 6                                                                 | 3.157674  | 2.292579  | 0.020026  |
| 6                                                                 | -5.659273 | -0.682802 | 0.027812  |
| 6                                                                 | 0.556879  | -1.650962 | -0.022308 |
| 6                                                                 | -1.707655 | -0.550480 | -0.032710 |
| 8                                                                 | 4.400433  | -0.032123 | 0.015787  |

|                                                               |           |           |           |
|---------------------------------------------------------------|-----------|-----------|-----------|
| 6                                                             | -6.820627 | -1.102034 | 0.051912  |
| 12                                                            | 3.425388  | -1.561306 | 0.001344  |
| 6                                                             | 1.940055  | 3.167388  | 0.012816  |
| 12                                                            | -4.076184 | -0.049889 | 0.005830  |
| 6                                                             | -1.016034 | 2.628507  | -0.018381 |
| 6                                                             | 1.692969  | -1.962048 | -0.015585 |
| 8                                                             | -2.412636 | 0.511993  | -0.031043 |
| 6                                                             | -2.175052 | 1.882187  | -0.023166 |
| 16                                                            |           |           |           |
| 975.403259 Kcal/mol 42.297542 eV -99.829275 H Child_17_29.log |           |           |           |
| 6                                                             | 8.902209  | 0.158343  | 0.654500  |
| 6                                                             | -8.710789 | -0.964688 | 0.116556  |
| 6                                                             | 7.703763  | -0.353029 | 0.353639  |
| 6                                                             | -8.077405 | -0.504859 | 1.132404  |
| 6                                                             | -0.178077 | 1.920998  | 0.111386  |
| 12                                                            | -6.358329 | -0.330178 | 0.051445  |
| 6                                                             | 1.114081  | 1.803808  | -0.033401 |
| 6                                                             | -4.286651 | -0.334248 | -0.488442 |
| 8                                                             | 6.538548  | -0.666019 | -0.010112 |
| 6                                                             | -1.777535 | -0.267995 | -0.376273 |
| 6                                                             | 2.307351  | 1.236126  | -0.169257 |
| 6                                                             | -3.033344 | -0.252694 | -0.444074 |
| 6                                                             | -1.533321 | 1.750656  | 0.221051  |
| 12                                                            | 0.270406  | -0.210103 | -0.476667 |
| 6                                                             | 3.480364  | 0.629928  | -0.229628 |
| 8                                                             | 5.660351  | -2.140317 | 0.011600  |
| 16                                                            |           |           |           |
| 975.773363 Kcal/mol 42.313591 eV -99.828686 H MutI_18_71.log  |           |           |           |
| 6                                                             | 2.425968  | 4.907462  | -0.442928 |
| 6                                                             | 2.362526  | 2.954947  | -0.257199 |
| 6                                                             | -1.613869 | -1.143357 | -0.594842 |
| 12                                                            | 0.686475  | -1.861720 | -0.148634 |
| 6                                                             | 0.972865  | -0.227845 | -0.244219 |
| 6                                                             | 3.290757  | -0.500397 | 0.226710  |
| 6                                                             | -0.212841 | -2.982143 | -0.217369 |
| 6                                                             | -4.881786 | -0.440319 | -0.865220 |
| 6                                                             | 5.381182  | -1.916199 | 0.802007  |
| 6                                                             | 4.322566  | -1.198389 | 0.509825  |
| 6                                                             | -3.601896 | -0.700024 | -0.655882 |
| 8                                                             | -0.128092 | 0.338250  | -0.496605 |
| 12                                                            | -4.318381 | 0.427402  | 0.439019  |
| 8                                                             | -4.182908 | 1.253968  | 1.528556  |
| 6                                                             | 2.335616  | 1.695479  | -0.160911 |
| 6                                                             | 2.230726  | 0.296463  | -0.056675 |
| 16                                                            |           |           |           |
| 978.903553 Kcal/mol 42.449329 eV -99.823697 H Child_12_13.log |           |           |           |
| 8                                                             | -3.390459 | -3.849896 | 0.118700  |
| 12                                                            | -0.541798 | 3.954064  | -0.075128 |
| 6                                                             | -2.874559 | -2.726498 | 0.040145  |
| 6                                                             | 3.552187  | 1.246747  | -0.408730 |
| 6                                                             | -1.695873 | -1.902179 | -0.123554 |
| 6                                                             | 4.624057  | 0.605175  | -0.379335 |
| 6                                                             | -2.969448 | -1.314861 | -0.089429 |
| 8                                                             | 5.550647  | -0.379604 | -0.230936 |
| 6                                                             | -3.427732 | -0.022297 | -0.157142 |

|                                                                  |           |           |            |
|------------------------------------------------------------------|-----------|-----------|------------|
| 6                                                                | -1.591002 | 2.267084  | 0.840315   |
| 12                                                               | 0.126563  | -0.818006 | -0.486293  |
| 6                                                                | 8.964400  | -2.327944 | 0.741976   |
| 6                                                                | -2.398670 | 1.284712  | 0.263563   |
| 6                                                                | -3.313194 | 1.206463  | -0.080132  |
| 6                                                                | -1.016317 | 0.827633  | 0.371084   |
| 6                                                                | 0.096368  | 0.223180  | 0.253729   |
| 16                                                               |           |           |            |
| 979.769433 Kcal/mol 42.486877 eV -99.822317 H Original1D_0_3.log |           |           |            |
| 6                                                                | 0.000000  | 0.000000  | -3.121315  |
| 8                                                                | 0.000000  | 0.000000  | -4.377981  |
| 6                                                                | 0.000000  | 0.000000  | -1.913237  |
| 8                                                                | 0.000000  | 0.000000  | -0.577588  |
| 6                                                                | 0.000000  | 0.000000  | 0.761250   |
| 6                                                                | 0.000000  | 0.000000  | 2.017931   |
| 6                                                                | 0.000000  | 0.000000  | 3.389873   |
| 6                                                                | 0.000000  | 0.000000  | 4.690811   |
| 6                                                                | 0.000000  | 0.000000  | -5.681731  |
| 6                                                                | 0.000000  | 0.000000  | 5.984323   |
| 12                                                               | 0.000000  | 0.000000  | -7.433656  |
| 6                                                                | 0.000000  | 0.000000  | 7.287522   |
| 6                                                                | 0.000000  | 0.000000  | -9.741635  |
| 6                                                                | 0.000000  | 0.000000  | 8.479316   |
| 12                                                               | 0.000000  | 0.000000  | 10.203080  |
| 6                                                                | 0.000000  | 0.000000  | -11.084530 |
| 16                                                               |           |           |            |
| 981.183866 Kcal/mol 42.548213 eV -99.820063 H MutI_14_77.log     |           |           |            |
| 8                                                                | 2.147021  | -2.627825 | -0.795284  |
| 6                                                                | -4.539890 | 2.492600  | -0.262323  |
| 6                                                                | -2.292977 | -1.032381 | 1.378821   |
| 6                                                                | 0.587652  | -3.315812 | 0.912137   |
| 6                                                                | 9.484498  | 2.655460  | 0.382940   |
| 6                                                                | 1.411033  | -0.577076 | -1.473940  |
| 12                                                               | -1.864402 | 1.087548  | -0.418242  |
| 12                                                               | -0.077733 | 0.235844  | -0.845432  |
| 6                                                                | -3.470470 | 0.421364  | 0.908096   |
| 6                                                                | -5.476243 | 3.171703  | -0.509266  |
| 6                                                                | -3.514888 | -1.128413 | 2.007852   |
| 6                                                                | 1.633433  | -3.319761 | 0.060856   |
| 6                                                                | -3.502225 | 1.886104  | -0.154356  |
| 8                                                                | 2.055053  | -1.438801 | -1.504604  |
| 6                                                                | -0.678561 | -1.698676 | 0.952211   |
| 6                                                                | 8.640141  | 3.220273  | 1.390836   |
| 16                                                               |           |           |            |
| 997.056213 Kcal/mol 43.236504 eV -99.794769 H MutI_13_65.log     |           |           |            |
| 6                                                                | 3.689871  | 0.346110  | 0.008066   |
| 12                                                               | -0.280680 | -0.274612 | -0.632416  |
| 8                                                                | -1.779342 | -1.550856 | -0.686631  |
| 6                                                                | -2.742562 | -1.702937 | -0.385059  |
| 6                                                                | -3.946449 | 1.117609  | 0.165207   |
| 6                                                                | 6.982225  | -0.148459 | 0.332402   |
| 6                                                                | -3.952184 | -1.399946 | 0.296998   |
| 6                                                                | -1.517463 | 1.056209  | -0.201695  |
| 6                                                                | -4.596067 | -0.121206 | 0.526197   |
| 8                                                                | -2.583366 | 1.266217  | 0.085767   |



|                                                               |            |           |           |
|---------------------------------------------------------------|------------|-----------|-----------|
| 6                                                             | -4.507185  | 2.348957  | -0.188206 |
| 12                                                            | 5.331700   | 0.120878  | 0.164298  |
| 6                                                             | -5.727456  | -1.118646 | 1.171339  |
| 6                                                             | 2.490187   | 0.300523  | -0.149979 |
| 6                                                             | 1.343660   | 0.348457  | -0.291153 |
| 6                                                             | 8.198328   | -0.339688 | 0.453270  |
| 16                                                            |            |           |           |
| 999.627521 Kcal/mol 43.348007 eV -99.790672 H MutI_12_67.log  |            |           |           |
| 6                                                             | 2.122701   | 5.654533  | 0.363234  |
| 6                                                             | 2.958601   | 1.811955  | -0.041739 |
| 6                                                             | 0.840039   | 3.096383  | -0.091803 |
| 6                                                             | 3.159883   | 0.602663  | -0.044713 |
| 6                                                             | 2.719041   | -1.592374 | 0.055852  |
| 6                                                             | 1.818654   | 4.275526  | 0.182056  |
| 12                                                            | 1.398729   | -2.838644 | 0.401997  |
| 6                                                             | -0.597718  | 1.872336  | -0.505584 |
| 6                                                             | -9.487556  | 1.335280  | 0.369573  |
| 12                                                            | 0.136903   | -2.911134 | -0.474416 |
| 6                                                             | -1.386343  | -1.170789 | -1.062171 |
| 6                                                             | 2.198139   | 2.896423  | 0.015159  |
| 6                                                             | -1.251323  | -2.700263 | -1.488561 |
| 8                                                             | 0.399045   | -3.649187 | 1.634736  |
| 6                                                             | -10.857923 | 0.937245  | 0.258139  |
| 8                                                             | 3.120362   | -0.490333 | -0.033189 |
| 16                                                            |            |           |           |
| 1002.154501 Kcal/mol 43.457587 eV -99.786645 H MutI_16_73.log |            |           |           |
| 6                                                             | -1.065521  | 1.125430  | -1.098630 |
| 12                                                            | 2.619308   | -0.556123 | 1.123462  |
| 6                                                             | 2.791539   | 3.529159  | 0.456219  |
| 6                                                             | -3.511388  | 0.915714  | -0.475806 |
| 6                                                             | 1.892660   | -0.387571 | -1.581203 |
| 8                                                             | 0.979552   | 0.338678  | -1.708870 |
| 6                                                             | 4.523566   | -2.560942 | -0.202801 |
| 12                                                            | 3.218073   | -1.329533 | -0.174726 |
| 8                                                             | 1.001804   | 1.376114  | 1.050664  |
| 6                                                             | -4.614971  | 0.595283  | 0.205254  |
| 6                                                             | -3.885396  | -2.473441 | -0.794422 |
| 6                                                             | -4.992345  | -1.662260 | 1.480403  |
| 6                                                             | -4.833421  | -0.522061 | 0.734149  |
| 6                                                             | -2.258124  | 1.228014  | -0.800351 |
| 6                                                             | 0.199657   | 1.035034  | -1.079338 |
| 6                                                             | 1.437174   | 0.662563  | 2.136660  |
| 16                                                            |            |           |           |
| 1006.006102 Kcal/mol 43.624608 eV -99.780507 H                |            |           |           |
| Original3D_0_49.log                                           |            |           |           |
| 6                                                             | -0.100293  | -0.559080 | -0.136075 |
| 12                                                            | 1.390157   | -1.512759 | 1.311770  |
| 6                                                             | 3.042628   | -0.439527 | -0.885845 |
| 6                                                             | 2.728696   | 0.932153  | 0.340834  |
| 6                                                             | -1.890855  | -0.499766 | -0.660641 |
| 6                                                             | -2.190967  | -1.394131 | 0.262639  |
| 6                                                             | -0.538497  | -0.320898 | -1.934977 |
| 8                                                             | -1.138721  | -2.109628 | -0.088418 |
| 6                                                             | 2.290493   | 1.170335  | -1.458068 |
| 12                                                            | -0.114113  | 1.706964  | 0.167325  |

|             |            |           |           |                              |
|-------------|------------|-----------|-----------|------------------------------|
| 6           | -0.714337  | -0.081765 | 2.013883  |                              |
| 6           | -0.838609  | -1.215263 | -1.011697 |                              |
| 8           | -1.766583  | 0.633732  | 2.364940  |                              |
| 6           | -1.918494  | 4.032323  | -0.053841 |                              |
| 6           | -2.329059  | -0.261584 | -2.459542 |                              |
| 6           | 3.780943   | 0.216656  | -0.010223 |                              |
| 16          |            |           |           |                              |
| 1009.313475 | Kcal/mol   | 43.768030 | eV        | -99.775236 H MutD_15_44.log  |
| 6           | 2.267579   | 0.064521  | -0.221778 |                              |
| 6           | 10.412321  | 0.228754  | 0.315128  |                              |
| 6           | -4.787027  | -0.443315 | 0.165887  |                              |
| 6           | -1.747063  | 1.738757  | -0.051731 |                              |
| 6           | 6.526954   | -0.061966 | 0.172954  |                              |
| 6           | 12.282149  | -0.044684 | -0.112570 |                              |
| 12          | -1.522281  | -0.481345 | -0.104383 |                              |
| 6           | 5.370300   | -0.058222 | 0.071639  |                              |
| 8           | 8.948164   | -0.113027 | -0.031583 |                              |
| 6           | 3.659619   | 0.051247  | -0.116692 |                              |
| 12          | -10.739902 | 0.103485  | 0.045263  |                              |
| 6           | 7.750351   | -0.081499 | -0.078095 |                              |
| 6           | -7.564409  | -0.063900 | 0.001590  |                              |
| 6           | -3.607958  | -0.315318 | 0.007556  |                              |
| 6           | -6.201653  | -0.141189 | -0.017404 |                              |
| 8           | -8.825762  | 0.024928  | 0.017900  |                              |
| 16          |            |           |           |                              |
| 1012.340450 | Kcal/mol   | 43.899292 | eV        | -99.770412 H Child_10_16.log |
| 6           | 6.135758   | -0.252647 | -0.117433 |                              |
| 6           | -4.461152  | 2.030426  | 0.003409  |                              |
| 6           | 5.617737   | -1.254776 | 0.403090  |                              |
| 12          | -4.244173  | -0.224704 | -0.189611 |                              |
| 12          | 3.890550   | -0.046780 | -0.024125 |                              |
| 8           | 2.117938   | 0.771837  | -0.182523 |                              |
| 6           | -2.803540  | -2.054827 | -0.247798 |                              |
| 6           | 1.101959   | 1.422486  | -0.351072 |                              |
| 6           | -1.651674  | -2.746051 | -0.482923 |                              |
| 6           | -0.272763  | 0.351015  | 0.397992  |                              |
| 6           | -0.913199  | 2.503475  | -0.663427 |                              |
| 6           | -1.347780  | -0.653053 | 0.596167  |                              |
| 6           | -0.369124  | -2.893200 | -0.604025 |                              |
| 6           | 0.420629   | 2.553442  | -0.668106 |                              |
| 6           | -2.582098  | -0.983123 | 0.754940  |                              |
| 8           | -0.743569  | 1.118013  | 1.237518  |                              |
| 16          |            |           |           |                              |
| 1012.519605 | Kcal/mol   | 43.907061 | eV        | -99.770127 H MutI_7_75.log   |
| 6           | -3.180256  | 2.921831  | -0.083073 |                              |
| 6           | 5.852791   | 1.173644  | 0.313279  |                              |
| 6           | 4.892304   | 0.410678  | 0.139804  |                              |
| 12          | 1.472511   | -1.826674 | -0.376907 |                              |
| 8           | -1.478993  | -2.206608 | -0.269647 |                              |
| 6           | 6.964253   | 2.040998  | 0.521529  |                              |
| 6           | 4.149577   | -0.152979 | 0.007720  |                              |
| 6           | -3.604785  | 0.453903  | 0.064902  |                              |
| 6           | -4.332964  | -0.812654 | 0.333977  |                              |
| 6           | -3.469129  | 1.739847  | -0.024690 |                              |
| 12          | 2.704134   | -1.246502 | -0.237511 |                              |

|                                                |           |           |            |  |
|------------------------------------------------|-----------|-----------|------------|--|
| 8                                              | -3.893926 | -3.770623 | 0.701455   |  |
| 6                                              | -2.305303 | 5.544795  | -0.125994  |  |
| 6                                              | -3.059647 | -0.923286 | 0.019749   |  |
| 6                                              | -2.806770 | 4.118090  | -0.109411  |  |
| 6                                              | -0.289469 | -2.398872 | -0.404699  |  |
| 16                                             |           |           |            |  |
| 1019.877198 Kcal/mol 44.226117 eV -99.758402 H |           |           |            |  |
| OriginalID_10_0.log                            |           |           |            |  |
| 8                                              | 0.000000  | 0.000000  | 0.895714   |  |
| 6                                              | 0.000000  | 0.000000  | -0.424286  |  |
| 6                                              | 0.000000  | 0.000000  | -1.744286  |  |
| 6                                              | 0.000000  | 0.000000  | -3.064286  |  |
| 6                                              | 0.000000  | 0.000000  | 2.215714   |  |
| 6                                              | 0.000000  | 0.000000  | 3.535714   |  |
| 6                                              | 0.000000  | 0.000000  | -4.384286  |  |
| 8                                              | 0.000000  | 0.000000  | -5.704286  |  |
| 6                                              | 0.000000  | 0.000000  | -7.024286  |  |
| 12                                             | 0.000000  | 0.000000  | 4.855714   |  |
| 6                                              | 0.000000  | 0.000000  | 7.495714   |  |
| 6                                              | 0.000000  | 0.000000  | -8.344286  |  |
| 12                                             | 0.000000  | 0.000000  | 8.815714   |  |
| 6                                              | 0.000000  | 0.000000  | -9.664286  |  |
| 6                                              | 0.000000  | 0.000000  | 11.455714  |  |
| 6                                              | 0.000000  | 0.000000  | -10.984286 |  |
| 16                                             |           |           |            |  |
| 1031.797531 Kcal/mol 44.743032 eV -99.739405 H |           |           |            |  |
| Child_6_48.log                                 |           |           |            |  |
| 8                                              | 3.390934  | -2.290945 | -0.015307  |  |
| 6                                              | -5.462414 | -0.921031 | 0.641847   |  |
| 8                                              | 4.466163  | 0.330334  | 0.048012   |  |
| 6                                              | 2.625948  | -1.329851 | 0.004226   |  |
| 6                                              | -2.779692 | 1.636553  | -0.057724  |  |
| 6                                              | 3.251952  | 0.104514  | 0.056086   |  |
| 6                                              | -4.409814 | -1.304398 | -0.007728  |  |
| 12                                             | 0.486819  | -1.293119 | -0.050732  |  |
| 6                                              | -1.625243 | 1.069168  | -0.098672  |  |
| 6                                              | 2.218560  | 1.114523  | 0.063485   |  |
| 6                                              | -3.344575 | -1.683978 | -0.666900  |  |
| 6                                              | 1.192148  | 1.827058  | 0.017761   |  |
| 6                                              | -0.314068 | 0.679937  | -0.034320  |  |
| 6                                              | -1.645193 | -1.063188 | -0.138283  |  |
| 6                                              | 0.087070  | -0.504099 | 0.468881   |  |
| 12                                             | -0.622222 | 2.787589  | -0.095401  |  |
| 16                                             |           |           |            |  |
| 1034.579107 Kcal/mol 44.863653 eV -99.734973 H |           |           |            |  |
| Child_10_9.log                                 |           |           |            |  |
| 8                                              | -2.885816 | 4.338525  | 0.507335   |  |
| 6                                              | 2.721487  | -2.805765 | 0.985003   |  |
| 6                                              | -3.429350 | 3.267629  | 0.276145   |  |
| 6                                              | 1.769505  | -2.209406 | 0.256492   |  |
| 6                                              | -4.062539 | 2.177340  | 0.047614   |  |
| 6                                              | 0.382578  | -2.341594 | -0.094029  |  |
| 8                                              | 5.065147  | 2.969541  | -0.884546  |  |
| 6                                              | -0.823572 | -2.537326 | -0.360594  |  |
| 12                                             | -4.213705 | 0.166944  | -0.157215  |  |
| 6                                              | 2.569745  | -1.086823 | 0.410998   |  |
| 6                                              | 5.056395  | 1.833650  | -0.495358  |  |

|             |                     |           |           |                |
|-------------|---------------------|-----------|-----------|----------------|
| 12          | -2.920922           | -2.368456 | -0.532977 |                |
| 6           | 5.078708            | 0.647400  | -0.046764 |                |
| 6           | 3.560422            | -0.558479 | -0.299028 |                |
| 6           | -3.693860           | -1.803980 | -0.218619 |                |
| 6           | 2.233960            | 0.076288  | 1.421468  |                |
| 16          |                     |           |           |                |
| 1042.327936 | Kcal/mol            | 45.199674 | eV        | -99.722624 H   |
|             | Original2D_0_15.log |           |           |                |
| 6           | 2.370469            | -1.336884 | -0.000000 |                |
| 6           | 1.179175            | -1.076236 | -0.000000 |                |
| 8           | 0.000000            | -0.709645 | 0.000000  |                |
| 6           | 2.756329            | 0.423183  | -0.000000 |                |
| 6           | 0.348434            | 1.059137  | -0.000000 |                |
| 6           | 3.710636            | -1.982876 | -0.000000 |                |
| 6           | -1.759291           | 0.169831  | 0.000000  |                |
| 12          | -2.193563           | -2.061008 | 0.000000  |                |
| 8           | -3.421879           | -3.728392 | 0.000000  |                |
| 6           | 4.798641            | -1.352090 | -0.000000 |                |
| 12          | -1.017878           | 2.652423  | 0.000000  |                |
| 6           | 4.077762            | -0.053737 | -0.000000 |                |
| 6           | -3.177405           | 4.108149  | 0.000000  |                |
| 6           | 1.698181            | 1.271188  | -0.000000 |                |
| 6           | -0.902016           | 4.823506  | -0.000000 |                |
| 6           | -4.115526           | -1.318619 | 0.000000  |                |
| 16          |                     |           |           |                |
| 1046.255948 | Kcal/mol            | 45.370009 | eV        | -99.716364 H   |
|             |                     |           |           | MutD_13_38.log |
| 6           | -1.598765           | 5.214457  | -0.851369 |                |
| 6           | -3.005299           | -0.570031 | 2.873962  |                |
| 6           | -1.820989           | 6.342425  | -0.300182 |                |
| 6           | -0.142817           | -0.806025 | 0.703467  |                |
| 6           | -3.060729           | 2.687801  | 0.740875  |                |
| 12          | 2.003023            | -1.106707 | 0.135921  |                |
| 6           | -2.402981           | 3.901961  | -0.254324 |                |
| 6           | -3.260379           | -1.685555 | -2.179667 |                |
| 8           | -10.146027          | -2.556124 | 0.439886  |                |
| 6           | -2.593033           | -1.654953 | 0.250951  |                |
| 8           | -1.326360           | -1.503868 | 0.219247  |                |
| 6           | 3.930208            | -0.876779 | 0.087744  |                |
| 6           | -3.306960           | -2.950183 | -2.252071 |                |
| 6           | 6.515401            | -0.568396 | 0.023076  |                |
| 6           | 5.225708            | -0.722255 | 0.055285  |                |
| 12          | 8.405552            | -0.342864 | -0.024217 |                |
| 16          |                     |           |           |                |
| 1046.585947 | Kcal/mol            | 45.384319 | eV        | -99.715838 H   |
|             |                     |           |           | MutI_2_69.log  |
| 6           | 5.722537            | -1.440502 | 0.221637  |                |
| 6           | 4.575126            | -1.179418 | 0.456197  |                |
| 6           | -0.767092           | 1.633966  | -0.923306 |                |
| 6           | 2.411163            | 1.783605  | -1.503307 |                |
| 8           | -2.427070           | -1.340144 | 0.856605  |                |
| 6           | -4.820205           | -0.828127 | -0.271853 |                |
| 12          | 2.890541            | -0.512570 | 0.692563  |                |
| 6           | 1.341716            | -0.019026 | -0.840476 |                |
| 6           | 2.660748            | 1.184971  | -0.465789 |                |
| 6           | -2.891788           | 1.098045  | -0.115034 |                |
| 6           | -1.928453           | 1.328774  | -1.074399 |                |

|             |           |           |               |                  |
|-------------|-----------|-----------|---------------|------------------|
| 8           | -1.902194 | -1.269310 | -0.586295     |                  |
| 12          | -0.161822 | -1.263850 | 0.105148      |                  |
| 6           | 1.287299  | 3.251933  | 0.746560      |                  |
| 6           | -3.924395 | -1.314867 | -1.130096     |                  |
| 6           | -3.351742 | 1.532759  | 2.944031      |                  |
| 16          |           |           |               |                  |
| 1046.610470 | Kcal/mol  | 45.385383 | eV -99.715799 | H Child_4_48.log |
| 8           | 5.904589  | 0.775110  | -0.653980     |                  |
| 6           | -5.716764 | -0.223245 | -0.247000     |                  |
| 6           | 4.806327  | 0.395137  | -0.365334     |                  |
| 6           | -5.039818 | -1.611561 | -0.217340     |                  |
| 6           | 3.646834  | -0.080687 | -0.112883     |                  |
| 6           | -2.553731 | 3.408346  | -0.188815     |                  |
| 6           | 2.370638  | -0.326719 | 0.219856      |                  |
| 12          | -2.262803 | 1.265918  | -0.177396     |                  |
| 6           | 1.571770  | 0.421781  | 1.157362      |                  |
| 6           | -1.996829 | -1.663448 | -0.285297     |                  |
| 6           | 1.508072  | -1.326838 | -0.339899     |                  |
| 6           | -1.302169 | 3.680193  | -0.165806     |                  |
| 6           | 0.528272  | 0.862789  | 1.634333      |                  |
| 8           | -1.254003 | -0.835418 | -0.132750     |                  |
| 6           | 0.404390  | -1.825497 | -0.535086     |                  |
| 12          | 0.048917  | -2.080837 | 0.424837      |                  |
| 16          |           |           |               |                  |
| 1054.553336 | Kcal/mol  | 45.729818 | eV -99.703142 | H MutI_12_79.log |
| 6           | -3.833745 | -1.501704 | -1.462108     |                  |
| 6           | 1.944357  | 1.672916  | -0.446536     |                  |
| 6           | -0.717918 | -2.003515 | 1.024157      |                  |
| 6           | -0.293573 | -0.690127 | 1.389026      |                  |
| 6           | -1.183415 | 0.389350  | 1.069372      |                  |
| 6           | -0.058750 | 3.088558  | -0.901173     |                  |
| 12          | -2.548592 | -1.091074 | -0.617753     |                  |
| 6           | 0.963623  | 0.924525  | 1.511549      |                  |
| 6           | 2.479612  | 0.796302  | -0.533623     |                  |
| 12          | 3.158982  | -0.901787 | -0.365512     |                  |
| 6           | -1.610648 | 2.376421  | -0.160298     |                  |
| 6           | 1.058204  | 2.498732  | -0.790443     |                  |
| 8           | 3.567718  | -2.531153 | -0.271343     |                  |
| 6           | -0.758057 | 1.602760  | 1.432349      |                  |
| 6           | -1.243262 | -2.454956 | 0.001221      |                  |
| 8           | -2.043125 | 0.495997  | 0.146120      |                  |
| 16          |           |           |               |                  |
| 1056.114953 | Kcal/mol  | 45.797537 | eV -99.700653 | H MutI_18_41.log |
| 6           | -2.535475 | 2.879416  | -0.398288     |                  |
| 6           | -0.430485 | 3.928858  | -0.140737     |                  |
| 6           | -2.874230 | 1.596789  | -0.592087     |                  |
| 6           | -2.886609 | -2.654425 | -0.058675     |                  |
| 12          | -0.900295 | -1.972312 | 0.385788      |                  |
| 6           | 1.180353  | 2.776747  | 0.632674      |                  |
| 6           | -2.873739 | 0.160532  | -0.431636     |                  |
| 6           | 0.910232  | 1.637501  | 0.764095      |                  |
| 6           | -4.113596 | -3.216076 | 0.119493      |                  |
| 6           | 7.748146  | -1.140968 | 0.140223      |                  |
| 8           | -1.107645 | 4.922855  | -0.159705     |                  |
| 6           | 1.044907  | -1.215415 | 0.761481      |                  |

|                                                |           |           |           |
|------------------------------------------------|-----------|-----------|-----------|
| 6                                              | -2.928021 | -1.086897 | -0.063518 |
| 6                                              | 0.644496  | 0.099983  | 0.694406  |
| 8                                              | -1.787855 | -3.646747 | -0.504249 |
| 12                                             | 6.387638  | -0.761448 | -0.656868 |
| 16                                             |           |           |           |
| 1059.928214 Kcal/mol 45.962895 eV -99.694576 H |           |           |           |
| Original2D_16_1.log                            |           |           |           |
| 6                                              | 1.404167  | 0.969496  | 0.000000  |
| 8                                              | 1.792519  | -0.419422 | 0.000000  |
| 6                                              | -0.000000 | 0.761218  | -0.000000 |
| 12                                             | 0.298040  | -0.802909 | 0.000000  |
| 8                                              | 2.166093  | -3.044331 | 0.000000  |
| 6                                              | -0.216816 | 1.873666  | -0.000000 |
| 6                                              | -2.199742 | -1.260612 | -0.000000 |
| 12                                             | -0.492616 | 3.439239  | -0.000000 |
| 6                                              | -3.483013 | -1.512426 | -0.000000 |
| 6                                              | -4.787676 | -1.883076 | -0.000000 |
| 6                                              | -5.715785 | -3.269774 | -0.000000 |
| 6                                              | 0.273436  | 6.045798  | -0.000000 |
| 6                                              | 0.994522  | -3.228844 | 0.000000  |
| 6                                              | 2.354558  | 2.358664  | 0.000000  |
| 6                                              | 3.377171  | -1.383688 | 0.000000  |
| 6                                              | 3.110179  | -0.124745 | 0.000000  |
| 16                                             |           |           |           |
| 1060.780567 Kcal/mol 45.999857 eV -99.693218 H |           |           |           |
| Original2D_3_1.log                             |           |           |           |
| 6                                              | -2.687143 | -3.559286 | 0.000000  |
| 8                                              | -1.367143 | -2.239286 | 0.000000  |
| 12                                             | -1.367143 | -0.919286 | 0.000000  |
| 6                                              | -1.367143 | -3.559286 | 0.000000  |
| 6                                              | 1.272857  | 0.400714  | 0.000000  |
| 12                                             | 1.272857  | -2.239286 | 0.000000  |
| 6                                              | -0.047143 | 1.720714  | 0.000000  |
| 6                                              | -2.687143 | 1.720714  | 0.000000  |
| 6                                              | -1.367143 | 1.720714  | 0.000000  |
| 6                                              | 1.272857  | 3.040714  | 0.000000  |
| 6                                              | -2.687143 | 3.040714  | 0.000000  |
| 6                                              | 3.912857  | -0.919286 | 0.000000  |
| 8                                              | 3.912857  | 0.400714  | 0.000000  |
| 6                                              | 3.912857  | -2.239286 | 0.000000  |
| 6                                              | -1.367143 | 4.360714  | 0.000000  |
| 6                                              | -1.367143 | 3.040714  | 0.000000  |
| 16                                             |           |           |           |
| 1071.535225 Kcal/mol 46.466224 eV -99.676079 H |           |           |           |
| Child_1_19.log                                 |           |           |           |
| 6                                              | -1.515182 | 4.101801  | 0.805128  |
| 6                                              | -1.480983 | -2.713098 | 0.038396  |
| 6                                              | 2.289118  | 1.222470  | -1.407282 |
| 6                                              | 2.576063  | -2.376158 | 1.435378  |
| 12                                             | 0.092547  | 1.600870  | 0.447190  |
| 6                                              | -1.606008 | -1.490759 | 0.561990  |
| 6                                              | 2.851057  | 0.888725  | -0.226097 |
| 6                                              | 1.082631  | -1.725130 | 0.515195  |
| 6                                              | -2.871709 | 0.400606  | -2.087796 |
| 6                                              | -0.063233 | -1.433858 | -0.183699 |
| 6                                              | 4.043089  | 0.229907  | -0.663841 |

|                                                |           |           |           |  |
|------------------------------------------------|-----------|-----------|-----------|--|
| 6                                              | -2.266593 | -0.026061 | 0.993940  |  |
| 6                                              | -0.465725 | 0.189986  | -1.899514 |  |
| 12                                             | -1.660492 | -0.759502 | -1.140412 |  |
| 8                                              | 1.535438  | 0.274040  | -0.038139 |  |
| 8                                              | -1.112915 | 0.512586  | 2.666625  |  |
| 16                                             |           |           |           |  |
| 1083.497119 Kcal/mol 46.984941 eV -99.657017 H |           |           |           |  |
| Original3D_0_48.log                            |           |           |           |  |
| 6                                              | 0.164621  | -0.938376 | -0.226558 |  |
| 6                                              | -0.804587 | -0.419110 | -2.126718 |  |
| 6                                              | -1.400643 | 1.128708  | -1.555987 |  |
| 6                                              | 1.409020  | 0.505691  | -0.327180 |  |
| 6                                              | 2.478333  | -0.245424 | -0.174929 |  |
| 6                                              | 1.874375  | -1.207799 | -1.111542 |  |
| 6                                              | -1.958031 | 0.583859  | -0.485803 |  |
| 6                                              | 1.242755  | -1.820348 | -0.071768 |  |
| 6                                              | 3.537125  | -1.018133 | 0.012396  |  |
| 6                                              | 0.760161  | 2.372546  | 0.494554  |  |
| 6                                              | 4.413068  | -1.540261 | 1.903166  |  |
| 8                                              | -2.002267 | -1.696711 | -0.171238 |  |
| 12                                             | 0.108170  | 1.348673  | -0.554920 |  |
| 6                                              | -3.573454 | -1.663449 | 0.542712  |  |
| 12                                             | -3.016049 | -0.581850 | 1.543110  |  |
| 8                                              | 0.257028  | 3.743050  | 1.034695  |  |
| 16                                             |           |           |           |  |
| 1098.166469 Kcal/mol 47.621065 eV -99.633640 H |           |           |           |  |
| MutD_12_74.log                                 |           |           |           |  |
| 6                                              | 8.300110  | -0.780675 | 0.885752  |  |
| 6                                              | 0.087687  | -2.776600 | -1.009568 |  |
| 12                                             | 1.680082  | 1.580010  | -0.532656 |  |
| 6                                              | 1.800707  | 1.988995  | 0.398634  |  |
| 12                                             | -2.425381 | -1.991049 | -0.086572 |  |
| 6                                              | 6.723699  | -1.027957 | 0.804119  |  |
| 8                                              | -3.772314 | 0.705077  | -0.468226 |  |
| 6                                              | -1.912756 | 1.640433  | -0.260635 |  |
| 6                                              | 0.161763  | 2.708996  | -0.330192 |  |
| 6                                              | -5.248955 | -0.592371 | 1.458575  |  |
| 6                                              | -1.122749 | 2.673750  | -0.268245 |  |
| 6                                              | -1.067367 | -2.518660 | -1.519325 |  |
| 6                                              | 5.517701  | -0.746612 | 0.313783  |  |
| 8                                              | -6.382873 | -0.588146 | 1.243285  |  |
| 6                                              | -2.532800 | 0.403767  | -0.134588 |  |
| 6                                              | 4.323809  | -0.306896 | -0.133266 |  |
| 16                                             |           |           |           |  |
| 1112.219902 Kcal/mol 48.230481 eV -99.611244 H |           |           |           |  |
| MutI_5_79.log                                  |           |           |           |  |
| 6                                              | 0.887105  | -1.340435 | -0.331680 |  |
| 6                                              | -1.619075 | -1.182071 | -0.611321 |  |
| 6                                              | -3.092218 | -1.650932 | -0.592946 |  |
| 12                                             | -2.496519 | 1.594819  | -0.031080 |  |
| 6                                              | 1.768346  | 1.477417  | 1.257407  |  |
| 6                                              | 1.929515  | -0.927615 | 1.911458  |  |
| 6                                              | -0.296474 | -1.353993 | -0.594930 |  |
| 8                                              | 4.415620  | 0.828935  | -1.937124 |  |
| 6                                              | -4.101294 | 2.490203  | 0.155007  |  |
| 12                                             | 3.150155  | 0.057576  | -0.788012 |  |
| 6                                              | 1.402241  | -1.859963 | 2.409000  |  |

|   |           |           |           |
|---|-----------|-----------|-----------|
| 6 | 0.636200  | 1.845203  | 0.817158  |
| 6 | -0.529180 | 2.172483  | 0.371381  |
| 6 | -2.592201 | -0.347633 | -0.482241 |
| 8 | 1.922975  | -0.979726 | 0.360409  |
| 6 | -4.151698 | -2.426399 | -0.567822 |

16

1116.406306 Kcal/mol 48.412020 eV -99.604573 H

Original2D\_2\_2.log

|    |           |           |           |
|----|-----------|-----------|-----------|
| 6  | -0.000000 | -0.825143 | 0.000000  |
| 6  | 1.562242  | -2.494400 | 0.000000  |
| 12 | -1.313654 | 0.692067  | -0.000000 |
| 6  | 1.663722  | 0.357597  | -0.000000 |
| 6  | -2.674448 | -1.923337 | 0.000000  |
| 6  | 1.559140  | -0.940176 | 0.000000  |
| 6  | -2.825976 | 2.206384  | -0.000000 |
| 6  | 1.390918  | -3.972414 | 0.000000  |
| 6  | 1.168018  | -5.222185 | 0.000000  |
| 6  | 2.936918  | -2.685902 | 0.000000  |
| 6  | -2.001498 | 3.044910  | -0.000000 |
| 6  | -0.098330 | -2.221159 | 0.000000  |
| 12 | 0.995329  | 3.077666  | -0.000000 |
| 8  | 3.458075  | 3.919277  | -0.000000 |
| 6  | -1.576952 | 4.354881  | -0.000000 |
| 8  | -3.808404 | -1.833167 | 0.000000  |

16

1117.586844 Kcal/mol 48.463214 eV -99.602691 H

Child\_9\_52.log

|    |           |           |           |
|----|-----------|-----------|-----------|
| 6  | 2.143275  | 2.731464  | -0.057866 |
| 8  | -3.048010 | -1.977751 | -0.065399 |
| 6  | 2.424463  | 1.512285  | -0.208029 |
| 6  | -4.296053 | 0.328390  | 0.170160  |
| 12 | 3.926849  | -1.365301 | 0.455499  |
| 6  | -3.295648 | -0.665639 | -0.011779 |
| 6  | 2.700819  | 0.166872  | -0.318500 |
| 6  | -1.760411 | -2.388081 | -0.010374 |
| 12 | 0.191356  | 3.032792  | 0.088968  |
| 6  | -0.560898 | -2.661999 | 0.079227  |
| 6  | 1.804576  | -0.900761 | -0.369519 |
| 6  | -2.875051 | 0.608226  | 0.059240  |
| 8  | 2.281960  | -2.168524 | -0.206759 |
| 6  | -1.909644 | 1.578729  | 0.136406  |
| 6  | -1.141647 | 1.579945  | 0.044780  |
| 6  | -0.448791 | 0.303952  | -0.239802 |

16

1123.417323 Kcal/mol 48.716047 eV -99.593400 H

Original1D\_9\_0.log

|    |          |          |           |
|----|----------|----------|-----------|
| 6  | 0.000000 | 0.000000 | -4.572857 |
| 8  | 0.000000 | 0.000000 | -3.252857 |
| 6  | 0.000000 | 0.000000 | -1.932857 |
| 6  | 0.000000 | 0.000000 | -5.892857 |
| 6  | 0.000000 | 0.000000 | -0.612857 |
| 8  | 0.000000 | 0.000000 | 0.707143  |
| 12 | 0.000000 | 0.000000 | -7.212857 |
| 6  | 0.000000 | 0.000000 | 2.027143  |
| 6  | 0.000000 | 0.000000 | -9.852857 |
| 6  | 0.000000 | 0.000000 | 3.347143  |



|                                                |           |           |            |                 |
|------------------------------------------------|-----------|-----------|------------|-----------------|
| 6                                              | 0.000000  | 0.000000  | -11.172857 |                 |
| 6                                              | 0.000000  | 0.000000  | 4.667143   |                 |
| 6                                              | 0.000000  | 0.000000  | 5.987143   |                 |
| 6                                              | 0.000000  | 0.000000  | 7.307143   |                 |
| 6                                              | 0.000000  | 0.000000  | 8.627143   |                 |
| 12                                             | 0.000000  | 0.000000  | 9.947143   |                 |
| 16                                             |           |           |            |                 |
| 1125.060723 Kcal/mol 48.787312 eV -99.590781 H |           |           |            | Child_3_21.log  |
| 8                                              | 5.102374  | 2.099287  | -0.435080  |                 |
| 12                                             | -4.678304 | 0.456967  | 0.461443   |                 |
| 6                                              | 3.534024  | -2.177211 | -0.273738  |                 |
| 8                                              | -3.061018 | 1.597952  | 0.950701   |                 |
| 6                                              | 5.793600  | 3.025187  | -0.077191  |                 |
| 6                                              | -7.345865 | 0.329007  | -1.078850  |                 |
| 6                                              | 3.320417  | -1.078800 | 1.187613   |                 |
| 6                                              | 2.212071  | -2.411607 | -0.268330  |                 |
| 6                                              | -2.087126 | 1.085369  | 0.333436   |                 |
| 12                                             | 3.737250  | 0.523090  | -0.319705  |                 |
| 6                                              | 0.906152  | -2.686269 | -0.111506  |                 |
| 6                                              | -1.777772 | -0.209262 | -0.352241  |                 |
| 6                                              | -6.319066 | 0.010405  | -0.395891  |                 |
| 6                                              | 2.258126  | -0.765182 | 0.416628   |                 |
| 6                                              | -0.354697 | -2.788170 | 0.114479   |                 |
| 6                                              | -0.979562 | 0.776767  | -0.465380  |                 |
| 16                                             |           |           |            |                 |
| 1128.272042 Kcal/mol 48.926568 eV -99.585663 H |           |           |            | Child_10_46.log |
| 6                                              | 0.456115  | 2.034478  | -0.201433  |                 |
| 12                                             | -5.457537 | -1.145788 | -0.621381  |                 |
| 6                                              | -0.781224 | 2.133799  | 0.009946   |                 |
| 6                                              | 2.762621  | -2.057334 | 0.193795   |                 |
| 6                                              | 1.700913  | 1.726899  | -0.512021  |                 |
| 12                                             | 0.869737  | -1.416264 | 0.708639   |                 |
| 6                                              | -2.051884 | 1.902434  | 0.316640   |                 |
| 6                                              | -3.462320 | -0.747070 | -0.204313  |                 |
| 6                                              | 2.783266  | 1.130006  | -0.733724  |                 |
| 6                                              | -2.163056 | -0.611428 | -0.210506  |                 |
| 6                                              | 3.884256  | 0.416908  | -1.081015  |                 |
| 6                                              | -0.855264 | -0.506068 | -0.189173  |                 |
| 6                                              | -3.178446 | 1.405123  | 0.580798   |                 |
| 6                                              | 3.256704  | -1.121277 | -0.465644  |                 |
| 8                                              | 4.025401  | -0.768781 | -0.303841  |                 |
| 8                                              | 1.092540  | 0.332006  | 2.045442   |                 |
| 16                                             |           |           |            |                 |
| 1129.134401 Kcal/mol 48.963964 eV -99.584289 H |           |           |            | Child_7_13.log  |
| 6                                              | 3.642730  | -3.067154 | -0.051157  |                 |
| 6                                              | 5.410449  | 3.435810  | 0.701739   |                 |
| 6                                              | 0.318693  | -2.841586 | -0.403556  |                 |
| 6                                              | 0.493695  | 2.683332  | -0.098795  |                 |
| 6                                              | 4.412693  | -2.118611 | 0.458325   |                 |
| 6                                              | -0.766991 | 2.356173  | -0.037176  |                 |
| 8                                              | -0.819889 | -3.012388 | 0.955985   |                 |
| 6                                              | 1.754208  | 2.628728  | 0.014398   |                 |
| 12                                             | -0.285478 | -1.109037 | -0.273962  |                 |
| 6                                              | -1.950648 | 1.940717  | 0.072855   |                 |
| 6                                              | 2.326064  | 0.525982  | -0.886485  |                 |

|    |           |           |           |
|----|-----------|-----------|-----------|
| 6  | -3.097887 | 1.354812  | 0.253035  |
| 12 | 0.731114  | -0.018124 | -0.476012 |
| 8  | -4.090853 | 0.785792  | 0.426790  |
| 6  | -4.082510 | -0.905328 | -0.283546 |
| 6  | -2.804110 | -0.769759 | -0.083388 |

16

1140.889496 Kcal/mol 49.473713 eV -99.565556 H Child\_4\_14.log

|    |           |           |           |
|----|-----------|-----------|-----------|
| 8  | 7.875965  | 0.391594  | 0.187499  |
| 8  | -5.775775 | -0.874738 | -0.175587 |
| 6  | 6.718471  | 0.297586  | 0.091879  |
| 6  | -4.662324 | -0.566327 | 0.092260  |
| 12 | 4.653479  | 0.130287  | -0.083078 |
| 6  | 2.717467  | -0.044018 | -0.266925 |
| 6  | -3.393489 | -0.378648 | 0.261105  |
| 6  | 1.500350  | -0.160986 | -0.446783 |
| 6  | 0.084807  | -2.380168 | 1.237407  |
| 6  | 0.191116  | -0.264646 | -0.635516 |
| 6  | -2.548860 | 0.530270  | 0.871350  |
| 6  | -3.752605 | 3.090344  | -0.315854 |
| 12 | -1.470749 | -1.169293 | -0.613347 |
| 6  | -1.035981 | -0.287522 | -0.780469 |
| 6  | -1.368101 | 1.012855  | 1.144681  |
| 6  | -3.616568 | 1.873463  | 0.123832  |

16

1142.614667 Kcal/mol 49.548524 eV -99.562807 H Child\_13\_31.log

|    |           |           |           |
|----|-----------|-----------|-----------|
| 12 | -6.321396 | -2.702909 | -0.927731 |
| 6  | 4.320577  | 0.670683  | -0.106277 |
| 8  | -3.045565 | -0.125983 | 1.723466  |
| 6  | 4.306716  | -0.833396 | -0.158667 |
| 6  | -2.511530 | 0.661732  | 1.001522  |
| 6  | 4.343683  | -2.336138 | -0.212673 |
| 6  | -1.925850 | 1.473375  | 0.194330  |
| 6  | 2.943663  | 2.069110  | -0.012083 |
| 6  | -1.334764 | 2.303378  | -0.601381 |
| 6  | 2.851155  | 0.748336  | -0.055459 |
| 6  | -0.705218 | 3.122367  | -1.418960 |
| 6  | 2.778495  | -0.937957 | -0.112326 |
| 6  | -0.433567 | -2.524089 | 0.562489  |
| 8  | 2.900034  | -2.546144 | -0.172805 |
| 6  | 0.840944  | -2.284900 | 0.357784  |
| 12 | -1.318736 | 3.418076  | 0.174807  |

16

1143.753342 Kcal/mol 49.597902 eV -99.560992 H

Original2D\_0\_16.log

|    |           |           |           |
|----|-----------|-----------|-----------|
| 6  | 0.000000  | -0.380872 | 0.000000  |
| 6  | 0.660461  | 0.980959  | -0.000000 |
| 6  | -0.755146 | 1.483372  | -0.000000 |
| 6  | 1.362937  | -1.041567 | 0.000000  |
| 6  | 0.815241  | -2.157040 | 0.000000  |
| 8  | -1.384011 | 0.168485  | -0.000000 |
| 6  | 0.007989  | 2.751463  | -0.000000 |
| 6  | 2.029531  | 0.232966  | 0.000000  |
| 6  | -1.219120 | -2.534566 | 0.000000  |
| 8  | 1.265126  | 2.333264  | -0.000000 |
| 12 | 0.187822  | -3.816305 | 0.000000  |

|                                                |           |           |           |  |
|------------------------------------------------|-----------|-----------|-----------|--|
| 12                                             | -1.702764 | 3.359965  | -0.000000 |  |
| 6                                              | -4.203235 | 3.014628  | -0.000000 |  |
| 6                                              | 2.612906  | -1.556885 | 0.000000  |  |
| 6                                              | -1.832270 | -1.211101 | 0.000000  |  |
| 6                                              | 3.709105  | -2.004342 | 0.000000  |  |
| 16                                             |           |           |           |  |
| 1156.584432 Kcal/mol 50.154311 eV -99.540545 H |           |           |           |  |
| Original2D_15_2.log                            |           |           |           |  |
| 8                                              | 2.308504  | 1.117735  | -0.000000 |  |
| 6                                              | 2.174565  | -1.371350 | -0.000000 |  |
| 6                                              | -0.000000 | 0.869177  | 0.000000  |  |
| 6                                              | -0.945575 | 1.676790  | 0.000000  |  |
| 6                                              | 4.094125  | 0.919632  | -0.000000 |  |
| 12                                             | 2.244457  | -3.288388 | -0.000000 |  |
| 6                                              | -0.546246 | -2.101170 | 0.000000  |  |
| 12                                             | -2.102476 | 0.212241  | 0.000000  |  |
| 6                                              | -2.820000 | 3.345770  | 0.000000  |  |
| 6                                              | 1.617198  | -5.716896 | -0.000000 |  |
| 6                                              | 3.120960  | -0.180723 | -0.000000 |  |
| 6                                              | -4.770850 | 3.148824  | 0.000000  |  |
| 6                                              | -3.875181 | 4.103349  | 0.000000  |  |
| 6                                              | 0.433984  | -1.161833 | -0.000000 |  |
| 6                                              | -3.221987 | -1.462141 | 0.000000  |  |
| 8                                              | 1.032780  | 1.944414  | -0.000000 |  |
| 16                                             |           |           |           |  |
| 1159.578666 Kcal/mol 50.284154 eV -99.535773 H |           |           |           |  |
| Child_2_43.log                                 |           |           |           |  |
| 6                                              | 3.460229  | 1.210847  | -0.000000 |  |
| 6                                              | -2.772793 | -3.643402 | 0.000000  |  |
| 6                                              | 2.636169  | 2.196183  | -0.000000 |  |
| 6                                              | -2.673698 | -2.182803 | 0.000000  |  |
| 6                                              | 1.626825  | 3.091767  | -0.000000 |  |
| 6                                              | -1.426141 | -2.941797 | 0.000000  |  |
| 6                                              | 0.314816  | 2.573563  | -0.000000 |  |
| 6                                              | -2.701102 | -0.845513 | 0.000000  |  |
| 12                                             | 1.899469  | -0.324597 | 0.000000  |  |
| 8                                              | -2.388390 | 0.276679  | -0.000000 |  |
| 12                                             | -1.571444 | 3.609531  | -0.000000 |  |
| 8                                              | -0.205396 | -1.387835 | 0.000000  |  |
| 6                                              | -0.000000 | 1.265358  | -0.000000 |  |
| 6                                              | -1.855247 | 2.122588  | -0.000000 |  |
| 6                                              | 2.342802  | -4.351473 | 0.000000  |  |
| 6                                              | 3.850470  | -3.583645 | 0.000000  |  |
| 16                                             |           |           |           |  |
| 1197.934922 Kcal/mol 51.947440 eV -99.474648 H |           |           |           |  |
| Original2D_9_1.log                             |           |           |           |  |
| 6                                              | -0.094286 | -0.212143 | 0.000000  |  |
| 6                                              | -0.094286 | 1.107857  | 0.000000  |  |
| 12                                             | -1.414286 | 2.427857  | 0.000000  |  |
| 6                                              | 1.225714  | 1.107857  | 0.000000  |  |
| 6                                              | -2.734286 | 5.067857  | 0.000000  |  |
| 6                                              | -1.414286 | -0.212143 | 0.000000  |  |
| 8                                              | -2.734286 | -0.212143 | 0.000000  |  |
| 6                                              | -0.094286 | -1.532143 | 0.000000  |  |
| 6                                              | 1.225714  | -2.852143 | 0.000000  |  |
| 6                                              | 1.225714  | -0.212143 | 0.000000  |  |

|             |                     |           |           |                             |
|-------------|---------------------|-----------|-----------|-----------------------------|
| 6           | 2.545714            | -0.212143 | 0.000000  |                             |
| 6           | 1.225714            | -4.172143 | 0.000000  |                             |
| 12          | -1.414286           | 5.067857  | 0.000000  |                             |
| 6           | 2.545714            | -4.172143 | 0.000000  |                             |
| 6           | 3.865714            | -2.852143 | 0.000000  |                             |
| 8           | -0.094286           | -4.172143 | 0.000000  |                             |
| 16          |                     |           |           |                             |
| 1202.907856 | Kcal/mol            | 52.163087 | eV        | -99.466723 H MutI_10_77.log |
| 6           | -0.716420           | 0.199634  | -0.024689 |                             |
| 6           | -4.697735           | 0.414790  | -0.246862 |                             |
| 6           | 2.882583            | 2.236194  | -0.207902 |                             |
| 12          | -0.148936           | -1.175575 | 0.169090  |                             |
| 6           | 4.562245            | 4.972785  | 0.170879  |                             |
| 8           | 0.590976            | 1.172751  | -0.010515 |                             |
| 6           | -5.540517           | 0.742521  | 0.373901  |                             |
| 6           | 0.691206            | -2.197683 | 0.199382  |                             |
| 8           | -3.403826           | 0.259767  | -0.012812 |                             |
| 6           | -7.240940           | 0.817767  | -0.216358 |                             |
| 6           | 2.559884            | 0.905775  | -0.117813 |                             |
| 12          | 2.911233            | -3.587847 | -0.115708 |                             |
| 6           | 2.739203            | -1.118269 | -0.132475 |                             |
| 6           | -2.099437           | 0.269825  | -0.030510 |                             |
| 6           | 3.428250            | 3.388269  | 0.013680  |                             |
| 6           | 1.657549            | -3.014788 | 0.143104  |                             |
| 16          |                     |           |           |                             |
| 1205.514315 | Kcal/mol            | 52.276114 | eV        | -99.462570 H                |
|             | Original2D_0_21.log |           |           |                             |
| 6           | 1.232815            | 0.003594  | -0.000000 |                             |
| 8           | 0.255916            | 1.044573  | -0.000000 |                             |
| 12          | -0.000000           | -1.012605 | 0.000000  |                             |
| 6           | -0.739605           | 2.137238  | -0.000000 |                             |
| 6           | -2.454563           | 2.119457  | -0.000000 |                             |
| 6           | 2.863258            | 0.138554  | -0.000000 |                             |
| 6           | 1.308852            | 2.004623  | -0.000000 |                             |
| 12          | -2.361257           | 4.073800  | -0.000000 |                             |
| 6           | -3.490093           | 1.252895  | 0.000000  |                             |
| 6           | -1.009657           | -3.665625 | 0.000000  |                             |
| 6           | 1.844219            | -2.881547 | 0.000000  |                             |
| 6           | -4.483593           | 0.433801  | 0.000000  |                             |
| 6           | 2.986467            | 1.786850  | -0.000000 |                             |
| 8           | 2.832000            | -1.948323 | 0.000000  |                             |
| 6           | 3.679483            | -2.992823 | 0.000000  |                             |
| 6           | -1.132289           | -5.254405 | 0.000000  |                             |
| 16          |                     |           |           |                             |
| 1207.672121 | Kcal/mol            | 52.369686 | eV        | -99.459131 H MutI_13_33.log |
| 6           | -1.465162           | -3.791745 | -0.000000 |                             |
| 6           | 2.999072            | 0.463307  | 0.000000  |                             |
| 6           | 1.590452            | 0.905672  | 0.000000  |                             |
| 12          | -2.723773           | 2.050066  | -0.000000 |                             |
| 6           | -2.261598           | 3.890598  | -0.000000 |                             |
| 6           | 2.931274            | -0.956367 | 0.000000  |                             |
| 6           | 2.766896            | -2.445193 | 0.000000  |                             |
| 6           | -1.496596           | -0.441891 | -0.000000 |                             |
| 8           | 1.853382            | 2.181481  | 0.000000  |                             |
| 6           | 0.194395            | 0.688600  | 0.000000  |                             |

|                                                               |           |           |            |
|---------------------------------------------------------------|-----------|-----------|------------|
| 6                                                             | 0.000000  | -0.644926 | 0.000000   |
| 6                                                             | -1.203786 | 2.238423  | -0.000000  |
| 6                                                             | -1.283252 | 0.878551  | -0.000000  |
| 8                                                             | 1.304027  | -1.018257 | 0.000000   |
| 6                                                             | 1.410690  | -2.590350 | 0.000000   |
| 12                                                            | -1.472359 | -1.922889 | -0.000000  |
| 16                                                            |           |           |            |
| 1212.933960 Kcal/mol 52.597861 eV -99.450746 H MutI_13_59.log |           |           |            |
| 8                                                             | -2.873406 | -2.312700 | -0.556271  |
| 6                                                             | -1.696153 | -2.768464 | -0.113416  |
| 6                                                             | 4.507326  | -0.445509 | -0.425010  |
| 6                                                             | 0.284421  | 2.441471  | -0.097487  |
| 8                                                             | -2.291306 | 2.410163  | -0.250113  |
| 12                                                            | 5.447702  | -1.185697 | -0.553840  |
| 6                                                             | 0.272565  | 0.740188  | 1.533946   |
| 6                                                             | 3.520686  | 0.352070  | -0.274682  |
| 12                                                            | -0.628235 | -1.040163 | 1.445669   |
| 6                                                             | -4.296362 | 0.151459  | -0.788376  |
| 6                                                             | 2.547792  | 1.186145  | -0.131566  |
| 6                                                             | -0.949180 | 2.629695  | -0.124265  |
| 6                                                             | -3.967555 | -1.833094 | -0.887132  |
| 6                                                             | -1.031968 | -1.921401 | 0.698631   |
| 6                                                             | 1.493255  | 1.862901  | 0.191862   |
| 6                                                             | -3.437479 | 1.926308  | -0.290983  |
| 16                                                            |           |           |            |
| 1213.340069 Kcal/mol 52.615472 eV -99.450099 H MutI_14_35.log |           |           |            |
| 6                                                             | 0.000000  | 0.000000  | -0.165705  |
| 6                                                             | 0.000000  | 0.000000  | 7.218695   |
| 6                                                             | 0.000000  | 0.000000  | -2.228505  |
| 6                                                             | 0.000000  | 0.000000  | 5.955195   |
| 8                                                             | 0.000000  | 0.000000  | -4.787905  |
| 6                                                             | 0.000000  | 0.000000  | -6.010105  |
| 6                                                             | 0.000000  | 0.000000  | -3.507205  |
| 6                                                             | 0.000000  | 0.000000  | 9.802595   |
| 6                                                             | 0.000000  | 0.000000  | -9.831605  |
| 8                                                             | 0.000000  | 0.000000  | -11.119905 |
| 6                                                             | 0.000000  | 0.000000  | 11.007995  |
| 12                                                            | 0.000000  | 0.000000  | 1.872295   |
| 6                                                             | 0.000000  | 0.000000  | 3.946095   |
| 6                                                             | 0.000000  | 0.000000  | -8.517205  |
| 6                                                             | 0.000000  | 0.000000  | -7.275005  |
| 12                                                            | 0.000000  | 0.000000  | 8.535295   |
| 16                                                            |           |           |            |
| 1218.035165 Kcal/mol 52.819070 eV -99.442617 H MutI_16_59.log |           |           |            |
| 6                                                             | 0.000000  | 0.736961  | 0.000000   |
| 12                                                            | -0.235903 | 3.570928  | 0.000000   |
| 6                                                             | 1.782966  | -4.802989 | 0.000000   |
| 6                                                             | -1.453225 | 0.443044  | 0.000000   |
| 6                                                             | -1.989378 | 1.728460  | 0.000000   |
| 6                                                             | -1.427776 | 2.877906  | 0.000000   |
| 6                                                             | 2.187151  | 1.495208  | 0.000000   |
| 6                                                             | 3.512931  | 1.753723  | 0.000000   |
| 6                                                             | -2.540488 | -2.400437 | 0.000000   |
| 6                                                             | -1.254562 | -2.345370 | 0.000000   |
| 8                                                             | 1.231565  | 0.201824  | 0.000000   |

|             |           |           |           |              |                     |
|-------------|-----------|-----------|-----------|--------------|---------------------|
| 8           | 0.542524  | 2.362179  | 0.000000  |              |                     |
| 6           | -0.008304 | -3.515330 | 0.000000  |              |                     |
| 6           | 2.445245  | -2.883112 | 0.000000  |              |                     |
| 12          | -1.998154 | -0.982444 | 0.000000  |              |                     |
| 6           | 0.848100  | -1.683703 | 0.000000  |              |                     |
| 16          |           |           |           |              |                     |
| 1238.787682 | Kcal/mol  | 53.718986 | eV        | -99.409545 H | Child_18_19.log     |
| 8           | -3.033502 | 6.545319  | -0.142248 |              |                     |
| 12          | 4.770636  | -1.057099 | -0.487237 |              |                     |
| 6           | -3.630445 | -3.114806 | -0.443546 |              |                     |
| 6           | 2.041548  | 0.073099  | -0.798941 |              |                     |
| 6           | -2.795338 | -0.528643 | -0.420759 |              |                     |
| 6           | 2.109104  | 0.963228  | 0.101251  |              |                     |
| 6           | -2.839021 | -2.099602 | -0.152001 |              |                     |
| 6           | 1.640187  | 1.951763  | 0.984123  |              |                     |
| 6           | -1.543724 | -1.810176 | 0.475959  |              |                     |
| 6           | 1.380406  | 3.167694  | 0.301367  |              |                     |
| 6           | -1.377148 | -0.620679 | -0.256993 |              |                     |
| 6           | 0.972043  | 1.490572  | 2.129263  |              |                     |
| 6           | -0.838941 | -2.135701 | 1.628640  |              |                     |
| 12          | 0.278346  | -0.161458 | -1.978262 |              |                     |
| 6           | 0.064502  | -2.122168 | 2.500071  |              |                     |
| 8           | -0.927352 | -1.128420 | -0.695827 |              |                     |
| 16          |           |           |           |              |                     |
| 1262.717677 | Kcal/mol  | 54.756690 | eV        | -99.371410 H | Child_1_43.log      |
| 12          | -0.777475 | 4.382074  | 0.000000  |              |                     |
| 6           | 2.436190  | -6.800943 | 0.000000  |              |                     |
| 6           | -3.375907 | 0.855569  | 0.000000  |              |                     |
| 6           | 1.872348  | -5.615593 | 0.000000  |              |                     |
| 6           | -1.978991 | 1.493636  | 0.000000  |              |                     |
| 6           | 1.342043  | -4.427079 | 0.000000  |              |                     |
| 6           | -0.985154 | 2.337502  | 0.000000  |              |                     |
| 12          | 1.460662  | -1.582035 | 0.000000  |              |                     |
| 6           | -2.314194 | 0.174762  | 0.000000  |              |                     |
| 8           | 0.384892  | 1.971269  | 0.000000  |              |                     |
| 6           | 1.778292  | 1.443211  | 0.000000  |              |                     |
| 6           | -1.166119 | -1.026690 | 0.000000  |              |                     |
| 6           | 0.000000  | 0.797624  | 0.000000  |              |                     |
| 6           | 1.067930  | 0.361124  | 0.000000  |              |                     |
| 6           | 2.344506  | 3.305929  | 0.000000  |              |                     |
| 8           | -2.175380 | -0.845616 | 0.000000  |              |                     |
| 16          |           |           |           |              |                     |
| 1265.839777 | Kcal/mol  | 54.892077 | eV        | -99.366435 H | Original3D_0_64.log |
| 6           | 1.305225  | 0.326015  | 0.497418  |              |                     |
| 12          | -0.690279 | -0.056831 | 0.093540  |              |                     |
| 8           | 1.008946  | -2.053006 | -1.179856 |              |                     |
| 6           | 2.434565  | -0.552200 | -0.449138 |              |                     |
| 6           | -3.735119 | 0.354632  | 0.999572  |              |                     |
| 6           | 1.810567  | 1.936518  | 0.166085  |              |                     |
| 6           | 1.259734  | -1.462920 | 1.848300  |              |                     |
| 6           | 0.375370  | 2.181227  | -1.955839 |              |                     |
| 8           | 3.704537  | 2.243420  | 0.542472  |              |                     |
| 6           | 3.987284  | 1.121985  | 0.215150  |              |                     |
| 6           | -4.155418 | -0.782375 | -0.573633 |              |                     |

|             |                     |           |           |                              |
|-------------|---------------------|-----------|-----------|------------------------------|
| 6           | 4.543300            | -1.393380 | -0.447865 |                              |
| 6           | 2.448189            | -2.224208 | 0.938114  |                              |
| 12          | -4.645982           | 0.723859  | -0.343206 |                              |
| 6           | -4.013010           | -0.043613 | 2.413274  |                              |
| 6           | -1.872809           | -1.049620 | -2.302261 |                              |
| 16          |                     |           |           |                              |
| 1269.926273 | Kcal/mol            | 55.069285 | eV        | -99.359923 H MutI_13_79.log  |
| 12          | -3.707723           | -1.433771 | 0.250644  |                              |
| 6           | 2.499978            | 1.387374  | -0.524869 |                              |
| 8           | -0.841264           | -0.084732 | -0.769146 |                              |
| 6           | 0.414194            | 2.853967  | 1.609333  |                              |
| 6           | 1.780565            | 2.306093  | 1.093539  |                              |
| 6           | 4.733200            | -0.719608 | 0.050561  |                              |
| 6           | -0.743812           | 2.514685  | -0.109901 |                              |
| 8           | 0.494383            | 1.633901  | -0.818439 |                              |
| 12          | -4.905766           | -1.632563 | 0.654013  |                              |
| 6           | 5.314857            | -3.635939 | 0.518362  |                              |
| 6           | -0.746115           | 1.188857  | -0.890076 |                              |
| 6           | -2.110286           | 2.580655  | -0.120114 |                              |
| 6           | -1.881742           | -1.106658 | -0.438529 |                              |
| 6           | -0.895822           | -1.722140 | -1.015160 |                              |
| 6           | 5.503616            | -1.920838 | 0.243204  |                              |
| 6           | 3.820853            | 0.340659  | -0.108883 |                              |
| 16          |                     |           |           |                              |
| 1290.027702 | Kcal/mol            | 55.940966 | eV        | -99.327889 H Child_15_14.log |
| 8           | 4.014101            | -0.703152 | 1.822570  |                              |
| 8           | -7.798924           | -3.037645 | 1.367249  |                              |
| 6           | 3.146439            | -0.389674 | 1.092188  |                              |
| 6           | -2.572572           | 2.317297  | 0.864111  |                              |
| 6           | 2.202149            | -0.061385 | 0.213043  |                              |
| 6           | -2.070717           | 1.885352  | -0.451990 |                              |
| 6           | 1.608782            | 2.254206  | -0.001606 |                              |
| 6           | -1.757151           | 0.620510  | -0.952629 |                              |
| 6           | 1.300458            | 3.550744  | 0.117420  |                              |
| 6           | -1.292709           | 3.012921  | 0.616406  |                              |
| 6           | 1.123583            | -0.877777 | -0.113245 |                              |
| 6           | -1.571071           | 3.227024  | -0.815159 |                              |
| 6           | 0.146403            | -1.565315 | -0.402617 |                              |
| 6           | -1.296942           | -0.484770 | -1.270497 |                              |
| 12          | 0.232543            | -1.877220 | -1.342571 |                              |
| 12          | 2.807347            | -2.373483 | -0.231687 |                              |
| 16          |                     |           |           |                              |
| 1294.885933 | Kcal/mol            | 56.151639 | eV        | -99.320147 H                 |
|             | Original2D_14_1.log |           |           |                              |
| 6           | 2.036996            | 0.986184  | 0.000000  |                              |
| 12          | 0.000000            | 0.648854  | 0.000000  |                              |
| 6           | -2.397082           | -1.655721 | -0.000000 |                              |
| 8           | 1.055398            | -1.602803 | -0.000000 |                              |
| 6           | 2.395221            | -1.521253 | -0.000000 |                              |
| 12          | -2.942069           | 0.366249  | 0.000000  |                              |
| 6           | -1.495167           | 2.941079  | 0.000000  |                              |
| 8           | 3.424934            | 1.770729  | 0.000000  |                              |
| 6           | 2.904933            | 3.048795  | 0.000000  |                              |
| 6           | 3.320625            | 0.052381  | 0.000000  |                              |
| 6           | 3.137080            | 4.313560  | 0.000000  |                              |

|   |           |           |           |
|---|-----------|-----------|-----------|
| 6 | -4.324544 | -1.251377 | -0.000000 |
| 6 | -4.095409 | -2.577936 | -0.000000 |
| 6 | -4.957840 | 0.632578  | 0.000000  |
| 6 | 1.500629  | -2.999598 | -0.000000 |
| 6 | 1.884920  | -4.222800 | -0.000000 |

16

1306.740236 Kcal/mol 56.665691 eV -99.301256 H

Original3D\_4\_5.log

|    |           |           |           |
|----|-----------|-----------|-----------|
| 6  | -1.494842 | 1.006529  | 0.521147  |
| 12 | 0.107632  | 0.318891  | -0.957512 |
| 6  | -0.163566 | 2.778945  | -0.038716 |
| 6  | 2.684499  | -1.248655 | 0.207373  |
| 12 | 2.848660  | -0.774556 | -1.013561 |
| 6  | -1.088044 | -2.683552 | -0.857047 |
| 6  | 0.839387  | 3.603163  | 1.843290  |
| 6  | -1.387804 | -1.927624 | 0.823285  |
| 6  | -1.466281 | 2.710655  | -0.240390 |
| 6  | -2.469234 | 1.886438  | -2.122397 |
| 6  | 5.318489  | 0.592051  | -0.150815 |
| 8  | -2.690518 | -1.995914 | 0.621611  |
| 6  | -0.356289 | 0.600720  | 1.943755  |
| 6  | 0.050509  | -3.089361 | 0.565562  |
| 6  | -2.497796 | 0.182312  | -1.360860 |
| 8  | -0.220690 | -0.629307 | 1.484357  |

16

1308.992797 Kcal/mol 56.763372 eV -99.297666 H

MutI\_1\_67.log

|    |           |           |          |
|----|-----------|-----------|----------|
| 6  | -4.379036 | 1.007168  | 0.000000 |
| 6  | -0.557231 | -1.688791 | 0.000000 |
| 6  | 1.068674  | 3.657506  | 0.000000 |
| 12 | -2.275067 | -2.286705 | 0.000000 |
| 12 | 3.304688  | 4.494908  | 0.000000 |
| 8  | -0.000000 | 0.996623  | 0.000000 |
| 6  | -2.612031 | 0.222092  | 0.000000 |
| 6  | 1.769154  | -4.020733 | 0.000000 |
| 6  | 0.714040  | -1.059479 | 0.000000 |
| 6  | -0.086258 | -3.085722 | 0.000000 |
| 6  | -3.049931 | 1.749067  | 0.000000 |
| 6  | 0.245719  | -4.415702 | 0.000000 |
| 8  | 1.391925  | -2.431314 | 0.000000 |
| 6  | 1.873156  | 2.989016  | 0.000000 |
| 6  | 4.968133  | 2.655565  | 0.000000 |
| 6  | -3.869531 | -0.513472 | 0.000000 |

16

1315.809160 Kcal/mol 57.058958 eV -99.286804 H

MutI\_18\_51.log

|    |           |           |           |
|----|-----------|-----------|-----------|
| 6  | 7.853828  | -1.315184 | 1.164435  |
| 6  | -0.449088 | 4.965293  | 0.320191  |
| 12 | 8.698444  | -0.664223 | 0.009807  |
| 6  | -4.806089 | -1.132664 | 0.026501  |
| 6  | -7.493139 | -2.474409 | 0.201003  |
| 8  | -3.291189 | 0.692398  | -0.112828 |
| 8  | -4.716284 | 0.805506  | -0.055081 |
| 6  | -6.274812 | -1.971988 | 0.139590  |
| 6  | 4.576689  | -0.965494 | -0.424515 |
| 6  | 1.520359  | -0.487873 | -0.542146 |
| 6  | -2.511302 | 1.717120  | -0.127966 |



|             |                    |           |           |                            |
|-------------|--------------------|-----------|-----------|----------------------------|
| 6           | -8.673942          | -3.072490 | 0.255986  |                            |
| 12          | 3.061052           | -0.749508 | -0.512372 |                            |
| 6           | 6.424058           | -1.102789 | 0.071963  |                            |
| 6           | -1.856632          | 2.780914  | -0.003415 |                            |
| 6           | -1.152291          | 3.889821  | 0.147381  |                            |
| 16          |                    |           |           |                            |
| 1318.254474 | Kcal/mol           | 57.164996 | eV        | -99.282907 H MutI_7_77.log |
| 6           | -0.201034          | -2.522300 | -1.480902 |                            |
| 6           | -3.278350          | -0.083898 | 0.046056  |                            |
| 12          | -0.956760          | -3.144236 | 0.261717  |                            |
| 6           | -1.549274          | 3.699893  | -0.006462 |                            |
| 12          | -1.290375          | -2.048722 | -0.273498 |                            |
| 6           | 4.340903           | -2.254338 | -0.291032 |                            |
| 8           | -3.479272          | 1.157959  | 0.034645  |                            |
| 6           | 5.892302           | 0.354771  | 0.845114  |                            |
| 6           | 2.363068           | 0.334408  | -0.468364 |                            |
| 8           | 3.470765           | 0.300485  | -0.060792 |                            |
| 6           | -3.550508          | 2.462225  | -0.066130 |                            |
| 6           | -2.736728          | -1.301135 | 0.108892  |                            |
| 6           | -2.752063          | -1.260759 | 1.454131  |                            |
| 6           | 4.700918           | 0.063451  | 0.351291  |                            |
| 6           | 1.270438           | 4.660255  | -0.089370 |                            |
| 6           | 0.005939           | 4.288752  | -0.344798 |                            |
| 16          |                    |           |           |                            |
| 1330.478196 | Kcal/mol           | 57.695068 | eV        | -99.263427 H MutI_2_67.log |
| 6           | 1.447275           | 0.559105  | -0.036354 |                            |
| 12          | 2.143167           | -2.886604 | 0.027528  |                            |
| 6           | -2.647954          | 0.549089  | 1.795215  |                            |
| 6           | 0.758226           | 1.726443  | -0.184447 |                            |
| 6           | -2.842148          | 2.333415  | 1.298079  |                            |
| 6           | 4.658641           | 1.780105  | 0.748056  |                            |
| 8           | -2.375746          | -1.175331 | 0.922454  |                            |
| 6           | 4.987333           | 2.661813  | -0.286955 |                            |
| 6           | -2.268728          | 1.370245  | -1.650494 |                            |
| 6           | -1.385199          | -1.915803 | -0.052684 |                            |
| 6           | 1.796620           | -0.720799 | 0.019138  |                            |
| 6           | -2.024623          | -1.024352 | -0.649315 |                            |
| 12          | 0.617913           | -2.387641 | -0.003537 |                            |
| 6           | -1.757215          | 2.185481  | -0.108271 |                            |
| 8           | -2.175627          | 0.009130  | -1.369546 |                            |
| 6           | -0.175889          | 2.598682  | -0.343827 |                            |
| 16          |                    |           |           |                            |
| 1331.998955 | Kcal/mol           | 57.761014 | eV        | -99.261004 H               |
|             | Original2D_4_2.log |           |           |                            |
| 6           | 3.399245           | -1.997743 | 0.000000  |                            |
| 6           | 2.191507           | -2.487868 | -0.000000 |                            |
| 12          | 0.097427           | -2.077112 | -0.000000 |                            |
| 6           | -0.000000          | 1.186794  | 0.000000  |                            |
| 12          | -1.661370          | 0.199250  | -0.000000 |                            |
| 8           | -3.544936          | 1.848385  | -0.000000 |                            |
| 6           | -1.260293          | -4.374067 | -0.000000 |                            |
| 6           | 2.675905           | -0.642361 | 0.000000  |                            |
| 6           | 1.955479           | 0.753465  | 0.000000  |                            |
| 6           | 0.468334           | 2.983561  | 0.000000  |                            |
| 8           | -4.009448          | 0.004438  | -0.000000 |                            |

|             |           |           |           |                             |
|-------------|-----------|-----------|-----------|-----------------------------|
| 6           | 3.975399  | -0.044500 | 0.000000  |                             |
| 6           | -4.386252 | -1.513152 | -0.000000 |                             |
| 6           | 3.176711  | 1.574698  | 0.000000  |                             |
| 6           | 1.185528  | 1.841735  | 0.000000  |                             |
| 6           | -0.181165 | 4.004732  | 0.000000  |                             |
| 16          |           |           |           |                             |
| 1333.514367 | Kcal/mol  | 57.826729 | eV        | -99.258589 H MutI_7_65.log  |
| 6           | 3.597135  | 0.931859  | 0.768334  |                             |
| 12          | -2.229344 | 1.686936  | -0.444851 |                             |
| 6           | 0.718643  | 1.850390  | -0.269450 |                             |
| 8           | -7.848119 | -2.860974 | 0.574348  |                             |
| 6           | 5.477903  | 0.158445  | 1.986036  |                             |
| 6           | 2.612427  | 1.589291  | 0.432877  |                             |
| 12          | 3.950724  | -2.129341 | -0.378325 |                             |
| 6           | 2.111174  | -2.078064 | -1.248179 |                             |
| 8           | 0.434227  | -0.936607 | -1.331921 |                             |
| 6           | -8.337676 | -2.176750 | 1.350923  |                             |
| 6           | -4.019109 | 3.421883  | 0.271593  |                             |
| 6           | -3.168266 | 2.533665  | -0.095921 |                             |
| 6           | -0.445575 | -0.080371 | -1.132296 |                             |
| 6           | 4.449836  | -1.216668 | 0.297484  |                             |
| 6           | -1.182493 | 1.041143  | -0.808682 |                             |
| 6           | 4.628429  | -0.026573 | 1.103730  |                             |
| 16          |           |           |           |                             |
| 1341.864866 | Kcal/mol  | 58.188841 | eV        | -99.245281 H MutI_16_65.log |
| 8           | 3.330784  | 0.261883  | 0.178098  |                             |
| 6           | 2.170149  | -0.042999 | 0.432222  |                             |
| 6           | 1.004339  | -0.335296 | 0.704240  |                             |
| 6           | -1.517701 | -2.297740 | -0.769005 |                             |
| 12          | -1.515816 | -3.506102 | -0.324430 |                             |
| 6           | 7.613793  | 1.353760  | -0.690337 |                             |
| 12          | -1.484975 | -0.909096 | 1.202783  |                             |
| 6           | -4.031971 | 2.830672  | -1.313329 |                             |
| 8           | 4.546313  | 0.571956  | -0.067806 |                             |
| 6           | -4.319782 | 1.103845  | 0.018185  |                             |
| 6           | 5.784478  | 0.856144  | -0.287064 |                             |
| 6           | -1.702578 | -0.983578 | -0.594862 |                             |
| 6           | -3.916222 | 4.693008  | 0.881604  |                             |
| 6           | -0.160905 | -0.604245 | 0.986962  |                             |
| 6           | -3.308937 | 0.892446  | -0.840317 |                             |
| 6           | -2.115876 | 0.252593  | -0.432061 |                             |
| 16          |           |           |           |                             |
| 1349.816770 | Kcal/mol  | 58.533669 | eV        | -99.232609 H MutI_13_77.log |
| 6           | 3.436237  | 1.279230  | 0.137115  |                             |
| 8           | 0.915355  | 1.993677  | -0.028795 |                             |
| 6           | 2.319998  | -1.720840 | -0.417837 |                             |
| 6           | 1.415014  | -2.382667 | -1.226691 |                             |
| 12          | -3.281206 | -1.392056 | -0.038594 |                             |
| 6           | 5.043728  | 0.653689  | 0.277649  |                             |
| 6           | -1.656825 | 2.524745  | -0.215877 |                             |
| 6           | 2.135928  | 1.709659  | 0.046169  |                             |
| 12          | -3.924200 | -0.497711 | -0.778284 |                             |
| 6           | -7.480849 | 2.676362  | 1.692019  |                             |
| 6           | -0.392346 | 2.272207  | -0.152551 |                             |
| 8           | 7.186361  | -0.242735 | 0.686611  |                             |

|             |           |           |            |                              |
|-------------|-----------|-----------|------------|------------------------------|
| 6           | -4.691544 | 0.534133  | -1.563050  |                              |
| 6           | -1.808872 | -3.321653 | 1.581405   |                              |
| 6           | -2.420151 | -2.556404 | 0.890045   |                              |
| 6           | 7.708207  | -0.223516 | -0.291726  |                              |
| 16          |           |           |            |                              |
| 1368.297408 | Kcal/mol  | 59.335066 | eV         | -99.203158 H MutI_14_61.log  |
| 6           | 0.000000  | 0.000000  | -2.952520  |                              |
| 6           | 0.000000  | 0.000000  | -7.035420  |                              |
| 6           | 0.000000  | 0.000000  | -10.882820 |                              |
| 8           | 0.000000  | 0.000000  | 8.751380   |                              |
| 6           | 0.000000  | 0.000000  | 4.929880   |                              |
| 12          | 0.000000  | 0.000000  | 10.039680  |                              |
| 6           | 0.000000  | 0.000000  | -5.026320  |                              |
| 6           | 0.000000  | 0.000000  | 3.707680   |                              |
| 6           | 0.000000  | 0.000000  | 6.194780   |                              |
| 12          | 0.000000  | 0.000000  | 2.426980   |                              |
| 6           | 0.000000  | 0.000000  | -0.914520  |                              |
| 6           | 0.000000  | 0.000000  | 7.436980   |                              |
| 6           | 0.000000  | 0.000000  | -8.298920  |                              |
| 6           | 0.000000  | 0.000000  | 1.148280   |                              |
| 8           | 0.000000  | 0.000000  | -9.615520  |                              |
| 6           | 0.000000  | 0.000000  | -12.088220 |                              |
| 16          |           |           |            |                              |
| 1388.448051 | Kcal/mol  | 60.208882 | eV         | -99.171046 H Child_15_25.log |
| 6           | -3.269581 | 2.773075  | -0.291090  |                              |
| 12          | 6.671358  | 0.890050  | 0.073217   |                              |
| 6           | -3.825397 | 1.615822  | -0.210595  |                              |
| 6           | 5.030848  | 0.050613  | -0.010425  |                              |
| 6           | -4.365011 | 0.382391  | -0.201483  |                              |
| 6           | 3.978471  | -0.549846 | -0.099778  |                              |
| 8           | -0.217777 | 3.669641  | -0.153095  |                              |
| 6           | 2.817061  | -1.239676 | -0.188069  |                              |
| 6           | -4.710806 | -0.852835 | -0.172475  |                              |
| 6           | 1.646466  | -1.695312 | -0.184511  |                              |
| 6           | -0.687973 | 2.657592  | 0.316839   |                              |
| 6           | 0.451662  | -2.339418 | -0.252419  |                              |
| 12          | -2.762609 | -1.349099 | 0.040019   |                              |
| 6           | -0.735452 | -2.741113 | -0.486133  |                              |
| 6           | -0.854071 | -0.618836 | 0.691718   |                              |
| 8           | -2.252508 | -1.062910 | 0.799555   |                              |
| 16          |           |           |            |                              |
| 1392.649967 | Kcal/mol  | 60.391094 | eV         | -99.164350 H MutD_13_68.log  |
| 6           | -0.241525 | 0.065025  | -0.651022  |                              |
| 6           | 1.350909  | -0.726445 | -0.226936  |                              |
| 6           | 3.016106  | -0.279247 | 0.540961   |                              |
| 6           | -3.339386 | 0.909721  | 0.278655   |                              |
| 6           | 5.867399  | 0.813072  | 0.025867   |                              |
| 6           | -3.602070 | 3.285289  | -0.358443  |                              |
| 6           | -3.738009 | 2.044297  | 0.038139   |                              |
| 6           | -3.010992 | 4.400856  | -0.662195  |                              |
| 12          | 1.080992  | -3.420285 | -0.552586  |                              |
| 8           | -3.038078 | -0.142339 | 0.995248   |                              |
| 8           | 6.792702  | 1.811385  | 0.004766   |                              |
| 12          | -4.629652 | -1.171244 | 0.344042   |                              |
| 6           | -3.870665 | -2.838825 | -0.729929  |                              |

|   |          |           |          |
|---|----------|-----------|----------|
| 6 | 1.681833 | -1.702346 | 0.673783 |
| 6 | 3.440205 | 0.181948  | 0.126199 |
| 6 | 4.537352 | 0.804317  | 0.028659 |

16

1405.158402 Kcal/mol 60.933512 eV -99.144416 H

Original3D\_0\_32.log

|    |           |           |           |
|----|-----------|-----------|-----------|
| 6  | -0.700520 | 0.064300  | 0.966526  |
| 6  | 0.064763  | 0.214770  | -0.098416 |
| 6  | -0.771894 | 1.119356  | -0.571838 |
| 6  | -3.049665 | 0.924008  | -0.600134 |
| 6  | 0.901420  | -0.689816 | 0.375006  |
| 6  | 0.669219  | 2.219290  | -1.016965 |
| 8  | -0.611067 | -0.734695 | -0.718231 |
| 6  | 0.225590  | -1.639281 | -0.244809 |
| 6  | 1.505876  | 1.314704  | -0.543542 |
| 6  | 1.577251  | 0.259648  | 0.994821  |
| 6  | 0.990873  | -1.488811 | -1.309750 |
| 8  | 0.740593  | 1.164235  | 0.521399  |
| 6  | 0.811967  | 0.109179  | 2.059763  |
| 6  | -0.096064 | 2.068821  | 0.047977  |
| 12 | -3.654121 | -1.080512 | 0.318415  |
| 12 | 2.503361  | -1.443933 | -0.216513 |

16

1425.804247 Kcal/mol 61.828802 eV -99.111515 H

Original2D\_0\_28.log

|    |           |           |          |
|----|-----------|-----------|----------|
| 6  | -0.565714 | -0.330000 | 0.000000 |
| 6  | 0.754286  | -1.650000 | 0.000000 |
| 8  | -0.565714 | -1.650000 | 0.000000 |
| 12 | 0.754286  | 0.990000  | 0.000000 |
| 6  | -1.885714 | 0.990000  | 0.000000 |
| 6  | -0.565714 | -2.970000 | 0.000000 |
| 6  | -1.885714 | 2.310000  | 0.000000 |
| 6  | -1.885714 | -1.650000 | 0.000000 |
| 6  | -1.885714 | -2.970000 | 0.000000 |
| 6  | 2.074286  | -2.970000 | 0.000000 |
| 8  | -0.565714 | 3.630000  | 0.000000 |
| 6  | 3.394286  | 2.310000  | 0.000000 |
| 6  | 0.754286  | -2.970000 | 0.000000 |
| 6  | 3.394286  | -0.330000 | 0.000000 |
| 12 | -3.205714 | 0.990000  | 0.000000 |
| 6  | 4.714286  | 3.630000  | 0.000000 |

16

1434.003217 Kcal/mol 62.184343 eV -99.098449 H

Child\_4\_38.log

|    |           |           |           |
|----|-----------|-----------|-----------|
| 8  | 4.156062  | -1.252781 | -0.300006 |
| 6  | -3.245063 | 1.953932  | -0.136033 |
| 12 | 2.384505  | -1.602102 | -0.246959 |
| 6  | -1.824944 | 1.792641  | 0.051578  |
| 6  | 0.481974  | -1.295061 | -0.264931 |
| 6  | -2.745972 | 0.649099  | -0.135492 |
| 6  | 2.341144  | 1.825344  | -0.113601 |
| 8  | -0.163498 | -1.363358 | 1.877815  |
| 6  | -3.111971 | -0.709391 | -0.171358 |
| 6  | 2.740551  | 2.895687  | -0.058010 |
| 6  | -3.835268 | -1.418017 | -0.669163 |
| 6  | 0.424974  | -0.091386 | -0.213383 |

|                                                |           |           |           |  |
|------------------------------------------------|-----------|-----------|-----------|--|
| 6                                              | -0.631775 | -2.003489 | -0.283209 |  |
| 12                                             | 0.163701  | 1.900236  | 0.239103  |  |
| 6                                              | 1.121981  | 0.948315  | -0.118202 |  |
| 6                                              | -2.135461 | -1.655757 | 0.023770  |  |
| 16                                             |           |           |           |  |
| 1436.762909 Kcal/mol 62.304015 eV -99.094051 H |           |           |           |  |
| Original3D_1_3.log                             |           |           |           |  |
| 12                                             | 0.259819  | 0.745568  | -0.067897 |  |
| 6                                              | 1.039109  | -1.342640 | -0.852423 |  |
| 6                                              | 1.061007  | 3.832574  | -0.735198 |  |
| 6                                              | -1.387164 | -1.063861 | 1.517960  |  |
| 12                                             | 2.990330  | -1.736923 | -1.876364 |  |
| 8                                              | 2.444071  | -1.638822 | 1.028218  |  |
| 6                                              | -2.303460 | -1.249480 | 0.630876  |  |
| 6                                              | 1.190447  | -1.793411 | 0.721936  |  |
| 6                                              | -0.154309 | -0.471512 | 1.902949  |  |
| 6                                              | -2.590350 | -0.373227 | -0.812624 |  |
| 6                                              | -2.395585 | 2.000560  | -0.799450 |  |
| 8                                              | 1.324318  | 2.673769  | 0.123838  |  |
| 6                                              | -0.051038 | 3.446709  | 0.158304  |  |
| 6                                              | -3.588619 | -1.652254 | -0.022282 |  |
| 6                                              | -3.401008 | -1.009823 | -1.699779 |  |
| 6                                              | 1.056154  | 0.279146  | 2.342179  |  |
| 16                                             |           |           |           |  |
| 1444.209777 Kcal/mol 62.626942 eV -99.082184 H |           |           |           |  |
| Child_2_22.log                                 |           |           |           |  |
| 6                                              | 5.294258  | -0.526912 | -0.265916 |  |
| 6                                              | -4.169044 | 3.095685  | -0.076443 |  |
| 6                                              | 4.157585  | -1.088975 | -0.217131 |  |
| 6                                              | -4.198964 | -2.827508 | -0.309663 |  |
| 8                                              | 3.688833  | 2.722333  | 0.830019  |  |
| 6                                              | -3.751456 | -1.805376 | 0.444399  |  |
| 6                                              | 2.940109  | -1.617059 | -0.061887 |  |
| 6                                              | -3.639958 | 1.622571  | 0.175878  |  |
| 6                                              | 2.792973  | 3.122138  | 0.170011  |  |
| 8                                              | -2.798419 | 2.755118  | -0.042792 |  |
| 6                                              | -2.458052 | -2.081383 | 0.502930  |  |
| 6                                              | 1.761740  | -2.071677 | 0.096667  |  |
| 6                                              | -1.345897 | -2.454670 | 0.504047  |  |
| 12                                             | 0.097407  | -1.155392 | -0.566104 |  |
| 6                                              | -0.557194 | 3.858237  | -0.762012 |  |
| 12                                             | 0.895935  | -1.108777 | -0.059154 |  |
| 16                                             |           |           |           |  |
| 1448.608098 Kcal/mol 62.817672 eV -99.075175 H |           |           |           |  |
| Original3D_0_78.log                            |           |           |           |  |
| 6                                              | -2.202883 | 0.920336  | -1.753589 |  |
| 12                                             | -0.102532 | 1.275509  | -0.923181 |  |
| 6                                              | -1.358785 | -1.693224 | -0.672475 |  |
| 6                                              | 1.676985  | -0.608991 | -0.421603 |  |
| 6                                              | 2.841917  | -0.982877 | 0.988341  |  |
| 6                                              | 1.383234  | 3.141296  | 0.815595  |  |
| 12                                             | -2.863129 | 0.759640  | -0.014897 |  |
| 8                                              | 2.887578  | 0.688432  | 0.158016  |  |
| 6                                              | 4.667094  | -1.196068 | 0.659594  |  |
| 6                                              | 6.492272  | -1.409258 | 0.330846  |  |
| 6                                              | -2.019032 | -1.853919 | 1.066217  |  |

|             |            |           |           |                              |
|-------------|------------|-----------|-----------|------------------------------|
| 8           | -3.248203  | 1.167308  | 2.882952  |                              |
| 6           | 0.741566   | -1.338050 | 0.157933  |                              |
| 6           | -5.009141  | -1.266843 | -0.014979 |                              |
| 6           | -3.459136  | -2.048397 | -1.502883 |                              |
| 6           | 2.658066   | 1.791378  | -1.831465 |                              |
| 16          |            |           |           |                              |
| 1449.585636 | Kcal/mol   | 62.860062 | eV        | -99.073617 H Child_16_11.log |
| 6           | -0.279730  | -2.421209 | -0.320702 |                              |
| 8           | -3.525108  | 1.843212  | -0.582335 |                              |
| 12          | 8.656634   | -0.534862 | 0.049641  |                              |
| 12          | -1.597009  | 2.125577  | -0.138043 |                              |
| 8           | 6.741334   | -0.511422 | 0.007416  |                              |
| 6           | 0.312066   | 1.845845  | 0.398112  |                              |
| 6           | 5.477976   | -0.459360 | -0.014907 |                              |
| 6           | 4.113753   | -0.421502 | -0.042297 |                              |
| 6           | 1.382752   | 1.201120  | 0.476758  |                              |
| 6           | 2.688770   | -0.182281 | 0.153753  |                              |
| 6           | -3.010719  | -0.717055 | -0.474067 |                              |
| 6           | 1.515773   | -0.328855 | -0.030849 |                              |
| 6           | -6.347747  | -0.339897 | 0.747945  |                              |
| 6           | -12.482993 | -1.322411 | 0.051699  |                              |
| 6           | -7.434551  | -0.951883 | 0.365972  |                              |
| 6           | -4.342902  | -0.859664 | -0.368054 |                              |
| 16          |            |           |           |                              |
| 1463.387661 | Kcal/mol   | 63.458575 | eV        | -99.051622 H MutI_16_77.log  |
| 6           | -0.022238  | 0.309036  | 1.635393  |                              |
| 6           | 3.029797   | -1.469604 | -0.382822 |                              |
| 12          | 3.186525   | -2.853023 | -0.522076 |                              |
| 6           | -2.326903  | -0.106568 | 2.581661  |                              |
| 6           | -0.325188  | 0.562351  | 2.842777  |                              |
| 12          | -5.937543  | 0.266863  | -1.517779 |                              |
| 6           | 2.396556   | 0.375592  | -0.459215 |                              |
| 8           | -0.277840  | -0.118533 | 0.309278  |                              |
| 8           | -5.255321  | 0.752782  | -0.628242 |                              |
| 6           | 0.504087   | 0.146873  | -0.722544 |                              |
| 6           | -1.546624  | -0.757121 | 0.279625  |                              |
| 6           | 3.590578   | 3.536373  | -0.431913 |                              |
| 6           | 3.113420   | -4.256082 | -0.603827 |                              |
| 6           | 3.975363   | 4.801964  | -0.522798 |                              |
| 6           | 3.145767   | 2.316671  | -0.462598 |                              |
| 6           | -2.655030  | -1.132831 | 0.751258  |                              |
| 16          |            |           |           |                              |
| 1490.579226 | Kcal/mol   | 64.637714 | eV        | -99.008290 H Child_7_12.log  |
| 12          | 3.470254   | 1.415142  | 0.915987  |                              |
| 8           | -5.384060  | -1.474621 | 1.448076  |                              |
| 6           | -0.514028  | 4.651785  | -0.842021 |                              |
| 6           | -6.130470  | -1.020240 | 0.697517  |                              |
| 8           | 4.294711   | -2.597258 | -0.498796 |                              |
| 6           | -3.416900  | -0.378263 | -1.111950 |                              |
| 6           | 3.691019   | -1.647946 | -0.105125 |                              |
| 6           | -2.055040  | -0.854464 | -0.946380 |                              |
| 6           | 3.151545   | -0.552388 | 0.328288  |                              |
| 6           | -2.317623  | 0.492947  | -0.733348 |                              |
| 12          | -0.099966  | -1.466981 | -0.636857 |                              |
| 6           | 1.384181   | 1.212981  | 0.822302  |                              |

|                                                               |           |           |           |
|---------------------------------------------------------------|-----------|-----------|-----------|
| 6                                                             | -1.621110 | 1.619535  | -0.362066 |
| 6                                                             | 1.776199  | -0.057001 | 0.556606  |
| 6                                                             | -0.808102 | 2.510026  | -0.002845 |
| 6                                                             | 1.572220  | -0.444120 | -0.124945 |
| 16                                                            |           |           |           |
| 1497.610459 Kcal/mol 64.942618 eV -98.997085 H MutI_17_73.log |           |           |           |
| 6                                                             | -4.972868 | -0.451790 | -0.828097 |
| 6                                                             | 2.292023  | 2.775699  | -0.228510 |
| 6                                                             | 3.224429  | -0.624955 | 0.239700  |
| 12                                                            | 0.872211  | -0.509023 | -0.261158 |
| 6                                                             | -1.642922 | -1.255220 | -0.631533 |
| 6                                                             | 2.149451  | 0.130488  | -0.050869 |
| 6                                                             | -0.120983 | -2.926894 | -0.264602 |
| 8                                                             | 2.255202  | 1.544886  | -0.144424 |
| 6                                                             | -0.187577 | 0.189597  | -0.531775 |
| 6                                                             | 0.615418  | -1.902898 | -0.199261 |
| 6                                                             | -3.657701 | -0.720963 | -0.630255 |
| 6                                                             | 4.263266  | -1.308395 | 0.525700  |
| 6                                                             | 5.316022  | -2.019190 | 0.830803  |
| 8                                                             | -4.370462 | 0.235559  | 0.289477  |
| 12                                                            | -4.279717 | 0.958500  | 1.253256  |
| 6                                                             | 2.356802  | 4.841641  | -0.408900 |
| 16                                                            |           |           |           |
| 1504.976459 Kcal/mol 65.262038 eV -98.985346 H MutI_17_63.log |           |           |           |
| 8                                                             | 1.151305  | -0.040132 | 0.007132  |
| 6                                                             | -6.095169 | -1.553784 | 0.022957  |
| 6                                                             | 0.268019  | 1.061765  | 0.064300  |
| 6                                                             | 6.103944  | -0.129434 | -1.042902 |
| 12                                                            | 5.096682  | -0.176089 | -0.188827 |
| 8                                                             | -2.648223 | 2.464383  | 0.000823  |
| 6                                                             | 4.768297  | -0.353280 | 1.243349  |
| 12                                                            | 2.459316  | -0.070571 | 0.092824  |
| 6                                                             | -0.527207 | -1.343117 | -0.109087 |
| 6                                                             | 3.737679  | -0.145874 | 0.208934  |
| 6                                                             | -2.504005 | -1.808386 | -0.050774 |
| 6                                                             | -5.022914 | -0.929478 | -0.027714 |
| 6                                                             | -0.735796 | 1.799325  | 0.087530  |
| 6                                                             | -4.507664 | 1.685717  | -0.104271 |
| 6                                                             | -4.893352 | 0.509253  | -0.082953 |
| 6                                                             | -3.707937 | -1.531720 | -0.027970 |
| 16                                                            |           |           |           |
| 1529.847652 Kcal/mol 66.340557 eV -98.945711 H                |           |           |           |
| Original2D_0_24.log                                           |           |           |           |
| 6                                                             | 1.390714  | -0.942857 | 0.000000  |
| 6                                                             | 0.070714  | -0.942857 | 0.000000  |
| 6                                                             | -1.249286 | -2.262857 | 0.000000  |
| 6                                                             | 0.070714  | 0.377143  | 0.000000  |
| 12                                                            | 1.390714  | 0.377143  | 0.000000  |
| 8                                                             | -1.249286 | 1.697143  | 0.000000  |
| 6                                                             | 2.710714  | -2.262857 | 0.000000  |
| 6                                                             | -1.249286 | -0.942857 | 0.000000  |
| 6                                                             | -2.569286 | -0.942857 | 0.000000  |
| 6                                                             | -2.569286 | -2.262857 | 0.000000  |
| 6                                                             | -2.569286 | 0.377143  | 0.000000  |
| 6                                                             | -1.249286 | 0.377143  | 0.000000  |

|    |                                                                    |           |           |
|----|--------------------------------------------------------------------|-----------|-----------|
| 8  | -2.569286                                                          | 1.697143  | 0.000000  |
| 12 | 4.030714                                                           | 1.697143  | 0.000000  |
| 6  | 2.710714                                                           | 4.337143  | 0.000000  |
| 6  | -1.249286                                                          | -3.582857 | 0.000000  |
| 16 | 1538.470459 Kcal/mol 66.714477 eV -98.931970 H Child_7_15.log      |           |           |
| 8  | 5.585022                                                           | 1.902168  | -0.264568 |
| 8  | -4.089382                                                          | -0.836271 | 0.043005  |
| 6  | 4.501873                                                           | 1.410717  | -0.122042 |
| 12 | -2.629176                                                          | -1.911468 | 0.023182  |
| 6  | 3.268218                                                           | 1.065472  | 0.046743  |
| 6  | -4.136144                                                          | 0.452199  | -0.047706 |
| 6  | 4.956219                                                           | -1.971030 | 0.517800  |
| 6  | -4.514986                                                          | 1.705929  | -0.093702 |
| 6  | 2.198647                                                           | 0.271049  | 0.189570  |
| 6  | -0.570890                                                          | -2.015313 | -0.033534 |
| 12 | 0.109361                                                           | 0.813552  | 0.387749  |
| 6  | -2.980099                                                          | 1.520469  | -0.160906 |
| 6  | 0.696787                                                           | -1.406219 | -0.437928 |
| 6  | 1.346174                                                           | -1.296684 | 0.005819  |
| 6  | 1.972322                                                           | -1.783247 | -0.460491 |
| 6  | -3.692679                                                          | 2.821294  | 0.069933  |
| 16 | 1559.842864 Kcal/mol 67.641274 eV -98.897911 H Original3D_18_5.log |           |           |
| 6  | -0.502966                                                          | -0.521196 | 0.401945  |
| 6  | -0.181221                                                          | -0.577580 | -1.436016 |
| 6  | -2.741287                                                          | -0.280871 | 0.002742  |
| 6  | -1.131847                                                          | 0.630222  | 0.256534  |
| 12 | 0.125914                                                           | -1.672615 | 0.547357  |
| 6  | 2.072067                                                           | 0.817251  | -0.136348 |
| 8  | -2.127375                                                          | -3.067447 | -0.752311 |
| 6  | 1.428219                                                           | 0.333513  | -1.182224 |
| 6  | 3.008082                                                           | -1.429202 | 1.992436  |
| 6  | 3.666540                                                           | 0.093187  | -0.783021 |
| 6  | -3.706880                                                          | -0.708226 | 0.794827  |
| 12 | -0.487999                                                          | 1.113961  | 1.302410  |
| 6  | 5.904861                                                           | -0.147138 | -0.383818 |
| 6  | -2.404575                                                          | 1.297903  | -0.934754 |
| 6  | -0.810102                                                          | 0.573838  | -1.581427 |
| 8  | -0.780167                                                          | 3.844153  | 0.219503  |
| 16 | 1563.458895 Kcal/mol 67.798080 eV -98.892148 H MutD_13_76.log      |           |           |
| 6  | 1.862621                                                           | -0.465476 | -1.701977 |
| 6  | 2.611994                                                           | 0.672543  | -0.245158 |
| 6  | -0.591179                                                          | 2.995896  | 0.812450  |
| 8  | 8.783521                                                           | -0.085879 | -1.274530 |
| 6  | -2.608066                                                          | -2.266097 | -0.679479 |
| 6  | -1.612304                                                          | 2.750524  | 0.197238  |
| 8  | -3.780350                                                          | 1.496662  | 0.335751  |
| 12 | -3.204552                                                          | -0.302366 | 0.028642  |
| 6  | 0.545216                                                           | -1.195675 | -0.800988 |
| 6  | -3.263404                                                          | -2.349539 | -0.362409 |
| 6  | -4.465004                                                          | -2.760341 | -0.139725 |
| 6  | 2.017000                                                           | 1.874893  | -0.281000 |



|                                                               |           |           |           |
|---------------------------------------------------------------|-----------|-----------|-----------|
| 12                                                            | 3.905911  | -1.866104 | 2.458672  |
| 6                                                             | -2.736577 | 2.233936  | 0.298532  |
| 6                                                             | 0.917536  | 2.583532  | -0.102006 |
| 6                                                             | -0.751446 | -1.618300 | -0.718399 |
| 16                                                            |           |           |           |
| 1568.089254 Kcal/mol 67.998872 eV -98.884769 H MutI_17_51.log |           |           |           |
| 8                                                             | -2.324844 | 0.092660  | 1.804813  |
| 6                                                             | 4.927599  | -0.687479 | 0.289659  |
| 6                                                             | 0.773115  | 1.680928  | 1.153547  |
| 6                                                             | -3.081223 | -2.103068 | 0.865330  |
| 12                                                            | 0.711450  | 1.394558  | -0.262251 |
| 8                                                             | 3.427273  | -0.162978 | -0.560057 |
| 6                                                             | -2.891352 | -2.795938 | -0.074382 |
| 6                                                             | -0.720059 | -1.149366 | -1.360577 |
| 6                                                             | 1.394817  | 0.242975  | -0.863726 |
| 6                                                             | -2.944543 | -1.012826 | 1.535126  |
| 6                                                             | -2.014369 | -1.245104 | -1.439612 |
| 6                                                             | -2.084533 | 2.414755  | 0.085981  |
| 6                                                             | -2.920996 | 2.249094  | -0.834248 |
| 6                                                             | -0.320031 | 2.138465  | 0.325893  |
| 12                                                            | 0.437860  | -0.620560 | -1.176401 |
| 6                                                             | 6.113050  | -1.186676 | 1.534638  |
| 16                                                            |           |           |           |
| 1581.468103 Kcal/mol 68.579034 eV -98.863449 H                |           |           |           |
| Original3D_12_4.log                                           |           |           |           |
| 8                                                             | -1.075753 | 1.798159  | -0.066304 |
| 6                                                             | 1.084984  | 1.298890  | -0.679749 |
| 6                                                             | -2.132338 | -0.130202 | 0.467758  |
| 6                                                             | 0.046276  | 2.230628  | 0.532400  |
| 6                                                             | -3.829261 | -0.863790 | 1.030435  |
| 6                                                             | 1.574511  | 0.067852  | -0.753161 |
| 6                                                             | -4.428828 | -1.033843 | -0.792487 |
| 12                                                            | -3.258066 | -0.563535 | -0.223309 |
| 6                                                             | 1.139792  | 4.132768  | 0.037196  |
| 6                                                             | 3.199952  | -0.742888 | -0.177381 |
| 6                                                             | 2.632174  | -2.373318 | -0.857980 |
| 6                                                             | -0.067118 | -0.653226 | -0.175052 |
| 6                                                             | -0.578848 | 0.557859  | -0.105545 |
| 6                                                             | 2.688078  | 0.514523  | -0.138988 |
| 8                                                             | 2.687447  | -1.009017 | 1.029692  |
| 12                                                            | 1.518916  | -1.465187 | 0.387328  |
| 16                                                            |           |           |           |
| 1587.677836 Kcal/mol 68.848314 eV -98.853553 H                |           |           |           |
| Original2D_17_2.log                                           |           |           |           |
| 6                                                             | 1.107857  | -1.791429 | 0.000000  |
| 6                                                             | -0.212143 | -1.791429 | -0.000000 |
| 6                                                             | -1.532143 | -0.471429 | -0.000000 |
| 6                                                             | 1.107857  | -3.111429 | 0.000000  |
| 6                                                             | -1.532143 | 0.848571  | -0.000000 |
| 6                                                             | -0.212143 | 2.168571  | -0.000000 |
| 6                                                             | 1.107857  | 3.488571  | 0.000000  |
| 6                                                             | 1.107857  | -0.471429 | 0.000000  |
| 6                                                             | 2.427857  | -0.471429 | 0.000000  |
| 6                                                             | -2.852143 | -1.791429 | -0.000000 |
| 6                                                             | -0.212143 | 3.488571  | -0.000000 |

|                                                |           |           |           |  |
|------------------------------------------------|-----------|-----------|-----------|--|
| 8                                              | -1.532143 | -3.111429 | -0.000000 |  |
| 8                                              | -2.852143 | 0.848571  | -0.000000 |  |
| 6                                              | 1.107857  | 2.168571  | 0.000000  |  |
| 12                                             | 2.427857  | 0.848571  | 0.000000  |  |
| 12                                             | -0.212143 | -0.471429 | -0.000000 |  |
| 16                                             |           |           |           |  |
| 1627.581719 Kcal/mol 70.578712 eV -98.789962 H |           |           |           |  |
| Original3D_9_7.log                             |           |           |           |  |
| 8                                              | -1.599759 | -1.538753 | 0.027118  |  |
| 12                                             | -0.224364 | 0.287338  | 0.056770  |  |
| 8                                              | 2.945941  | -0.185276 | -0.367738 |  |
| 6                                              | 2.144966  | 0.392288  | 1.216452  |  |
| 6                                              | -3.394668 | 0.759952  | 0.481278  |  |
| 6                                              | 4.130605  | -0.132801 | 0.212103  |  |
| 6                                              | 3.138900  | -1.328854 | 2.346483  |  |
| 6                                              | -4.274211 | -0.468112 | -0.615563 |  |
| 6                                              | -0.338754 | 3.236544  | 0.023581  |  |
| 6                                              | -0.834607 | 2.638517  | 1.090771  |  |
| 6                                              | 2.066398  | -1.413340 | -1.464580 |  |
| 12                                             | -3.089546 | -0.415638 | -0.035722 |  |
| 6                                              | 2.755210  | -1.958892 | 0.182451  |  |
| 6                                              | -5.954728 | -1.118613 | -0.128214 |  |
| 6                                              | 3.441794  | 0.412750  | -1.434928 |  |
| 6                                              | 1.952007  | 1.535865  | -1.497769 |  |
| 16                                             |           |           |           |  |
| 1639.152519 Kcal/mol 71.080470 eV -98.771523 H |           |           |           |  |
| MutD_17_78.log                                 |           |           |           |  |
| 6                                              | -1.372994 | 2.152004  | 1.467505  |  |
| 12                                             | 0.670943  | 1.378102  | -1.673952 |  |
| 12                                             | -3.847157 | -2.516014 | -0.731316 |  |
| 6                                              | -2.678582 | 0.327651  | 1.978910  |  |
| 6                                              | -2.739635 | -0.178409 | -1.677550 |  |
| 6                                              | 0.533520  | 3.144907  | -0.150045 |  |
| 6                                              | 6.284706  | -0.693917 | -0.007589 |  |
| 6                                              | -2.442949 | 0.309168  | -0.816133 |  |
| 6                                              | 1.079887  | -2.391707 | 0.554843  |  |
| 6                                              | -1.734624 | 1.448686  | -0.419719 |  |
| 6                                              | 7.587201  | -0.315966 | -0.109298 |  |
| 8                                              | 5.154311  | -1.082476 | 0.085844  |  |
| 6                                              | -2.686851 | -0.077417 | 1.391257  |  |
| 8                                              | 0.668507  | -1.470607 | 1.105001  |  |
| 6                                              | -0.150927 | 2.602690  | 0.769233  |  |
| 6                                              | -3.090081 | -0.647756 | 0.241329  |  |
| 16                                             |           |           |           |  |
| 1657.563656 Kcal/mol 71.878854 eV -98.742183 H |           |           |           |  |
| MutD_15_36.log                                 |           |           |           |  |
| 6                                              | -1.922946 | -1.428289 | -0.531236 |  |
| 6                                              | 3.026225  | 0.168019  | 1.484722  |  |
| 12                                             | -2.004116 | 3.092114  | -0.635503 |  |
| 6                                              | -2.063774 | 0.829106  | 0.229399  |  |
| 6                                              | -1.975795 | -1.805143 | 0.064255  |  |
| 12                                             | -2.637398 | 0.008567  | 1.378613  |  |
| 6                                              | 1.082525  | 1.132127  | -1.588104 |  |
| 6                                              | 1.873672  | 0.432475  | -0.796071 |  |
| 8                                              | 4.237402  | -0.179250 | -0.587302 |  |
| 8                                              | 2.889218  | 0.002233  | 2.431405  |  |
| 6                                              | -2.989236 | -1.986459 | 0.938144  |  |

|             |                    |           |           |                             |
|-------------|--------------------|-----------|-----------|-----------------------------|
| 6           | 0.433373           | -0.074376 | -0.671408 |                             |
| 6           | -0.533758          | 0.604392  | 0.134915  |                             |
| 6           | -0.208864          | -2.541210 | -1.968554 |                             |
| 6           | 3.068658           | 0.055559  | -0.091765 |                             |
| 6           | -0.009212          | -1.351539 | -1.149321 |                             |
| 16          |                    |           |           |                             |
| 1662.516499 | Kcal/mol           | 72.093630 | eV        | -98.734290 H MutI_16_49.log |
| 6           | 1.185711           | -0.648684 | 2.688696  |                             |
| 6           | 2.396167           | 0.514488  | 0.033560  |                             |
| 6           | 6.369802           | -1.174162 | -2.122688 |                             |
| 6           | -2.054710          | 2.069098  | -0.209583 |                             |
| 12          | -1.985958          | 3.358537  | -0.327136 |                             |
| 6           | -1.737405          | 0.016144  | -0.360429 |                             |
| 6           | 1.051271           | 0.081938  | 0.168145  |                             |
| 6           | 3.580322           | 0.703041  | 0.396049  |                             |
| 12          | -3.412246          | -2.904651 | -0.235343 |                             |
| 6           | 3.265219           | -0.304180 | 2.262251  |                             |
| 8           | -2.790538          | -1.779495 | -0.304043 |                             |
| 6           | 0.178681           | -0.040597 | -0.758403 |                             |
| 6           | -3.999839          | -4.088716 | -0.303241 |                             |
| 8           | -1.719400          | 4.651108  | -0.402934 |                             |
| 6           | 5.739276           | -1.538625 | -1.234010 |                             |
| 6           | 0.835164           | -0.326333 | 1.507247  |                             |
| 16          |                    |           |           |                             |
| 1694.810838 | Kcal/mol           | 73.494047 | eV        | -98.682826 H MutI_8_67.log  |
| 6           | 2.622097           | 0.127048  | 0.005415  |                             |
| 6           | 2.018844           | 1.425843  | -0.229387 |                             |
| 6           | -3.479762          | -0.805843 | -0.671068 |                             |
| 12          | 1.907854           | -1.069617 | 0.266916  |                             |
| 6           | 2.621094           | 3.369730  | 0.806849  |                             |
| 12          | -0.324228          | -2.313509 | 0.318603  |                             |
| 6           | -2.529178          | 1.027872  | -0.717563 |                             |
| 6           | -5.265570          | 1.920763  | 0.827504  |                             |
| 6           | -1.544348          | -2.306881 | 0.128728  |                             |
| 8           | 0.645778           | 1.517675  | -0.383807 |                             |
| 6           | 5.126792           | 0.140449  | -0.320636 |                             |
| 6           | 3.964329           | 0.131513  | -0.174980 |                             |
| 8           | -2.706603          | -1.696533 | -0.248918 |                             |
| 6           | -4.289402          | 2.134773  | 0.233936  |                             |
| 6           | 0.924194           | -1.800902 | 0.379541  |                             |
| 6           | -0.588576          | 1.640363  | -0.595743 |                             |
| 16          |                    |           |           |                             |
| 1757.627146 | Kcal/mol           | 76.218023 | eV        | -98.582721 H                |
|             | Original2D_8_1.log |           |           |                             |
| 6           | 2.341974           | -0.661572 | -0.000000 |                             |
| 6           | -0.015911          | -1.363025 | 0.000000  |                             |
| 6           | 3.573437           | 0.230810  | -0.000000 |                             |
| 6           | 0.840577           | -0.288342 | -0.000000 |                             |
| 6           | 0.000000           | 0.824055  | -0.000000 |                             |
| 12          | -1.856410          | 1.699147  | 0.000000  |                             |
| 6           | 4.520425           | -0.702921 | -0.000000 |                             |
| 6           | -3.706094          | 2.908270  | 0.000000  |                             |
| 6           | 1.231900           | -4.114264 | 0.000000  |                             |
| 6           | -4.389746          | 1.719170  | 0.000000  |                             |
| 6           | -2.782884          | 4.006147  | -0.000000 |                             |

|             |           |           |           |                             |
|-------------|-----------|-----------|-----------|-----------------------------|
| 8           | 0.210846  | -3.542895 | 0.000000  |                             |
| 12          | 2.105516  | 1.490880  | -0.000000 |                             |
| 6           | -1.087856 | -2.160579 | 0.000000  |                             |
| 8           | 2.615142  | -1.905049 | -0.000000 |                             |
| 6           | -4.792016 | 0.486122  | 0.000000  |                             |
| 16          |           |           |           |                             |
| 1764.211755 | Kcal/mol  | 76.503559 | eV        | -98.572228 H MutI_7_79.log  |
| 6           | -3.188870 | -0.189236 | -0.365508 |                             |
| 6           | -5.253389 | -1.262500 | 0.048824  |                             |
| 6           | 6.046182  | -1.021445 | -1.597200 |                             |
| 6           | -2.779582 | 0.753743  | 0.149182  |                             |
| 6           | 2.486924  | -2.281267 | 2.007158  |                             |
| 6           | 1.140152  | 3.045400  | 0.325901  |                             |
| 8           | -5.745438 | -0.356149 | -0.371735 |                             |
| 6           | 3.625413  | 3.500355  | -0.104233 |                             |
| 6           | -0.040553 | -2.090347 | -0.527905 |                             |
| 8           | 3.058323  | -3.094436 | 1.508258  |                             |
| 6           | 4.694688  | -0.692701 | -1.465370 |                             |
| 12          | -1.668570 | -1.433580 | -0.947043 |                             |
| 6           | 1.032838  | -2.388667 | 0.220380  |                             |
| 6           | 0.040780  | 2.746261  | 0.475646  |                             |
| 6           | 2.296871  | 3.308889  | 0.143416  |                             |
| 12          | -1.590747 | 2.019728  | 0.534216  |                             |
| 16          |           |           |           |                             |
| 1805.009679 | Kcal/mol  | 78.272727 | eV        | -98.507212 H Child_9_36.log |
| 8           | 7.134413  | 1.841172  | 0.424978  |                             |
| 6           | -5.322150 | -2.304364 | 0.371050  |                             |
| 6           | 3.452725  | 0.569379  | 0.383785  |                             |
| 8           | -5.577162 | -1.238539 | -0.025984 |                             |
| 6           | 3.937530  | -0.624148 | 0.006650  |                             |
| 6           | -0.303328 | -1.833670 | -0.131649 |                             |
| 12          | -0.885225 | 2.258096  | -0.482148 |                             |
| 12          | -1.616578 | -0.296255 | 0.740090  |                             |
| 6           | 4.471755  | -1.709819 | -0.342288 |                             |
| 6           | 2.015337  | -3.254693 | -0.401003 |                             |
| 6           | -2.690583 | 3.176840  | -0.266532 |                             |
| 6           | 0.057111  | 0.450355  | -0.456639 |                             |
| 6           | 1.060442  | -2.392015 | -0.255414 |                             |
| 6           | -3.549851 | 2.292835  | -0.043245 |                             |
| 6           | 0.788757  | -0.964802 | -0.146930 |                             |
| 6           | -0.990473 | 1.866912  | 0.234340  |                             |
| 16          |           |           |           |                             |
| 1805.549011 | Kcal/mol  | 78.296114 | eV        | -98.506353 H Child_5_36.log |
| 6           | 5.333852  | 3.850544  | 0.172465  |                             |
| 6           | 2.939233  | -4.060866 | -0.221931 |                             |
| 6           | 4.716775  | 2.933937  | 0.049335  |                             |
| 6           | -3.649217 | -1.308418 | -0.251024 |                             |
| 6           | 4.607659  | 1.381993  | -0.167628 |                             |
| 6           | -2.389227 | -1.375687 | -0.198616 |                             |
| 6           | -4.352302 | 3.245651  | 0.375247  |                             |
| 8           | 2.274232  | -3.117011 | -0.098361 |                             |
| 6           | -3.659360 | 2.107747  | 0.344004  |                             |
| 6           | -1.008331 | -1.027949 | -0.211659 |                             |
| 6           | 1.933285  | -1.034188 | 1.035800  |                             |
| 12          | -3.650362 | 0.729552  | -0.408949 |                             |

|             |                    |           |           |                             |
|-------------|--------------------|-----------|-----------|-----------------------------|
| 12          | 2.850814           | -0.231408 | -0.366806 |                             |
| 6           | -2.781289          | 0.698954  | -0.372221 |                             |
| 6           | -0.925819          | 0.359180  | -0.293559 |                             |
| 8           | -1.648855          | -1.958379 | 1.066832  |                             |
| 16          |                    |           |           |                             |
| 1810.366395 | Kcal/mol           | 78.505016 | eV        | -98.498676 H MutD_6_70.log  |
| 6           | -1.882883          | -0.941082 | 0.614773  |                             |
| 8           | -2.183418          | 1.046789  | -0.507069 |                             |
| 6           | -0.153703          | 4.485672  | -0.730430 |                             |
| 6           | -2.064579          | -1.602109 | 0.852456  |                             |
| 12          | -1.785148          | 2.833035  | 0.984114  |                             |
| 8           | -2.471362          | 0.457929  | 0.214099  |                             |
| 6           | -7.861750          | -2.477595 | -1.164310 |                             |
| 6           | 0.554970           | -3.186823 | 0.089913  |                             |
| 6           | 1.083940           | 3.382141  | -0.302943 |                             |
| 6           | 3.116764           | -3.167794 | -0.042996 |                             |
| 6           | 1.864345           | -3.449653 | 0.042955  |                             |
| 6           | -0.549547          | -2.680167 | 0.123625  |                             |
| 12          | 2.722560           | 2.041068  | -0.292632 |                             |
| 6           | 3.310073           | 0.472382  | -0.219440 |                             |
| 6           | 3.448635           | -1.970187 | -0.097094 |                             |
| 6           | 3.465283           | -0.619283 | -0.158846 |                             |
| 16          |                    |           |           |                             |
| 1814.507172 | Kcal/mol           | 78.684577 | eV        | -98.492077 H                |
|             | Original3D_6_6.log |           |           |                             |
| 6           | -2.662232          | 0.566755  | -0.513572 |                             |
| 6           | -1.339063          | -0.750012 | -0.525670 |                             |
| 6           | -3.018841          | -1.121375 | 0.199061  |                             |
| 8           | 0.340715           | -0.378648 | -1.250401 |                             |
| 6           | -2.132347          | -2.887615 | 1.348724  |                             |
| 8           | -3.905335          | 0.644865  | -0.950603 |                             |
| 12          | 1.503751           | 0.781900  | -0.364243 |                             |
| 12          | 4.070023           | -0.612976 | 0.060690  |                             |
| 6           | -3.178975          | 1.355941  | 1.097317  |                             |
| 6           | -0.532636          | -1.277593 | 1.073121  |                             |
| 6           | 2.100561           | -1.245943 | -2.424260 |                             |
| 6           | -4.502145          | 2.672708  | 1.109414  |                             |
| 6           | 2.150042           | 2.731634  | 2.132805  |                             |
| 6           | -2.938773          | -2.360033 | -0.250067 |                             |
| 6           | 6.119552           | -1.218667 | 2.096511  |                             |
| 6           | 3.540137           | 2.841394  | -1.801606 |                             |
| 16          |                    |           |           |                             |
| 1819.059715 | Kcal/mol           | 78.881995 | eV        | -98.484822 H MutI_16_61.log |
| 8           | 2.961072           | 0.002349  | 0.103583  |                             |
| 6           | -5.362656          | 0.557511  | 0.054792  |                             |
| 6           | 1.782803           | 0.646814  | -0.158212 |                             |
| 6           | 1.827890           | -1.697267 | 1.469804  |                             |
| 6           | -0.706212          | 0.233257  | 0.539704  |                             |
| 6           | 0.905964           | 4.629396  | -0.911093 |                             |
| 6           | 0.534107           | -0.116682 | -0.095116 |                             |
| 6           | 2.988184           | -1.118540 | 0.780727  |                             |
| 12          | -0.498427          | -2.865508 | -1.906361 |                             |
| 6           | -0.924615          | -1.133991 | -0.834590 |                             |
| 6           | -4.133506          | 0.501245  | 0.421753  |                             |
| 6           | 0.259062           | -1.146279 | -0.855113 |                             |

|             |           |           |           |                             |
|-------------|-----------|-----------|-----------|-----------------------------|
| 6           | -1.696809 | 0.820350  | 1.181936  |                             |
| 6           | -2.979670 | 0.802509  | 0.900294  |                             |
| 12          | 1.655268  | 2.759482  | -0.494666 |                             |
| 8           | 0.932762  | -2.077053 | 1.626794  |                             |
| 16          |           |           |           |                             |
| 1838.022616 | Kcal/mol  | 79.704305 | eV        | -98.454603 H Child_7_23.log |
| 6           | 3.776290  | -1.929998 | -0.150862 |                             |
| 6           | 0.142695  | 3.470567  | 0.353413  |                             |
| 12          | 1.770317  | -2.189005 | -0.372506 |                             |
| 8           | -5.505474 | -0.085691 | 0.047745  |                             |
| 6           | 4.014200  | -0.714524 | 0.009265  |                             |
| 6           | -4.275506 | -0.119917 | 0.024907  |                             |
| 6           | -0.016072 | -1.220297 | -0.446076 |                             |
| 6           | -3.359525 | 0.938758  | -0.317076 |                             |
| 6           | 3.943013  | 0.644032  | 0.137800  |                             |
| 6           | -2.239000 | 1.430911  | -0.444565 |                             |
| 6           | -0.872806 | -0.316838 | -0.424472 |                             |
| 6           | 0.314129  | 2.261330  | -0.159695 |                             |
| 6           | 3.429082  | 1.767769  | 0.202631  |                             |
| 8           | -4.125862 | -2.326876 | 0.939218  |                             |
| 6           | -1.679642 | 0.846841  | -0.385311 |                             |
| 12          | 3.062145  | 0.268066  | 0.514552  |                             |
| 16          |           |           |           |                             |
| 1888.546836 | Kcal/mol  | 81.895245 | eV        | -98.374087 H MutD_15_38.log |
| 12          | 2.022949  | 2.075116  | -1.377380 |                             |
| 6           | -3.894463 | -0.427239 | 0.090963  |                             |
| 6           | 0.001223  | -0.218678 | -0.327978 |                             |
| 6           | -3.235774 | -2.816467 | -0.378454 |                             |
| 6           | -3.471754 | -0.561066 | -0.484723 |                             |
| 6           | -4.011561 | 2.562392  | 1.055831  |                             |
| 6           | 3.625372  | 0.592356  | -0.036833 |                             |
| 12          | 3.077553  | -1.182285 | 1.038015  |                             |
| 6           | 1.481619  | -0.554798 | -0.461103 |                             |
| 6           | -3.520902 | -3.517829 | -0.920927 |                             |
| 6           | 3.482908  | -2.599589 | 2.709263  |                             |
| 8           | 4.438308  | 1.562088  | -0.367669 |                             |
| 6           | 2.328773  | 0.523393  | -0.646682 |                             |
| 6           | -4.013153 | 1.324587  | 0.681878  |                             |
| 6           | -3.912859 | 3.784031  | 1.465650  |                             |
| 8           | -0.733631 | -1.469654 | -1.183447 |                             |
| 16          |           |           |           |                             |
| 1890.103157 | Kcal/mol  | 81.962734 | eV        | -98.371607 H MutD_15_68.log |
| 6           | 2.222989  | -0.403268 | -1.284494 |                             |
| 6           | 4.717734  | 0.894009  | 0.180907  |                             |
| 6           | 6.903342  | 0.189174  | 2.489276  |                             |
| 6           | 6.130018  | 0.926215  | 0.175497  |                             |
| 6           | -5.270241 | -0.733044 | 1.061965  |                             |
| 8           | 4.235388  | 0.952451  | -0.929821 |                             |
| 6           | -1.046922 | -2.535320 | -0.594007 |                             |
| 8           | -4.217798 | 3.870976  | -0.535753 |                             |
| 6           | 3.074775  | 0.320675  | -1.208334 |                             |
| 6           | -4.603810 | 2.842951  | -0.055167 |                             |
| 6           | -5.192053 | 0.445658  | 0.770846  |                             |
| 6           | -5.065639 | 1.750293  | 0.462142  |                             |
| 6           | -2.063689 | -2.782290 | 0.078914  |                             |

|                                                |           |           |           |                |
|------------------------------------------------|-----------|-----------|-----------|----------------|
| 12                                             | 0.520736  | -1.601022 | -1.384887 |                |
| 12                                             | -3.816858 | -2.211947 | 0.734022  |                |
| 6                                              | 6.762287  | 0.279651  | 1.178282  |                |
| 16                                             |           |           |           |                |
| 1922.175282 Kcal/mol 83.353514 eV -98.320497 H |           |           |           | MutD_13_78.log |
| 6                                              | -3.134580 | 1.017931  | 0.039617  |                |
| 6                                              | -6.595272 | -0.192341 | 1.176984  |                |
| 6                                              | 1.514259  | 2.953629  | -0.328367 |                |
| 6                                              | 3.779578  | -2.073386 | -0.227009 |                |
| 12                                             | 3.222781  | 1.908871  | 0.254478  |                |
| 8                                              | 5.876237  | -1.738990 | 0.185840  |                |
| 6                                              | -4.224858 | 0.301691  | 0.260801  |                |
| 8                                              | -7.142019 | -1.930493 | -0.689624 |                |
| 6                                              | -5.413548 | -0.213678 | 0.556633  |                |
| 6                                              | -6.770702 | -1.159228 | 0.127775  |                |
| 6                                              | 4.940374  | 0.552314  | 0.650329  |                |
| 6                                              | 2.513080  | -1.957298 | -0.389710 |                |
| 6                                              | 5.544189  | -0.487308 | 0.477400  |                |
| 6                                              | 4.866934  | -2.560195 | -0.293550 |                |
| 12                                             | -1.222462 | 1.434140  | -0.626388 |                |
| 6                                              | 0.667619  | 2.024491  | -0.635370 |                |
| 16                                             |           |           |           |                |
| 2008.317582 Kcal/mol 87.089003 eV -98.183220 H |           |           |           | Child_1_10.log |
| 8                                              | 5.321441  | -1.107480 | 0.033913  |                |
| 6                                              | -4.980960 | 2.332660  | 0.899406  |                |
| 6                                              | 4.211349  | -0.654937 | -0.007402 |                |
| 12                                             | -3.745616 | 0.684515  | -0.267570 |                |
| 6                                              | 3.095945  | -0.035612 | -0.078024 |                |
| 8                                              | -1.958730 | 0.116687  | -0.066383 |                |
| 6                                              | 1.775480  | 0.158575  | -0.066318 |                |
| 6                                              | -3.280114 | -2.227923 | -1.633156 |                |
| 12                                             | 1.940982  | 3.225430  | -0.614406 |                |
| 6                                              | 0.560852  | -0.657870 | 0.120409  |                |
| 6                                              | 0.115206  | 0.933045  | 1.611789  |                |
| 6                                              | 0.082362  | -1.869195 | 0.351294  |                |
| 6                                              | -1.590282 | -1.821206 | -0.268790 |                |
| 6                                              | 0.949582  | 1.397794  | -0.256652 |                |
| 6                                              | -0.645492 | -1.677816 | 0.650105  |                |
| 6                                              | -1.168275 | -2.376349 | 0.484584  |                |
| 16                                             |           |           |           |                |
| 2016.295811 Kcal/mol 87.434972 eV -98.170506 H |           |           |           | MutI_17_59.log |
| 6                                              | 1.422522  | 3.808338  | -0.064299 |                |
| 8                                              | 5.283695  | -0.703214 | 0.348860  |                |
| 6                                              | -5.412969 | 0.028796  | 0.128431  |                |
| 6                                              | 4.348304  | -1.636880 | 0.121715  |                |
| 12                                             | 0.453541  | 0.600857  | -0.099062 |                |
| 8                                              | 1.338794  | -2.632879 | -0.471132 |                |
| 6                                              | 6.176598  | 0.041218  | 0.706040  |                |
| 6                                              | -0.640445 | -1.088166 | -0.261541 |                |
| 6                                              | -7.664930 | -1.215448 | 0.620830  |                |
| 6                                              | -6.587651 | -0.522892 | 0.415665  |                |
| 6                                              | 0.388165  | -1.879680 | -0.392804 |                |
| 6                                              | 1.708019  | 5.108834  | -0.076982 |                |
| 6                                              | 1.239460  | 2.539135  | -0.075599 |                |
| 6                                              | 3.933662  | -2.833318 | 0.015369  |                |

12 -2.210755 0.258764 -0.313063  
6 -4.226292 0.378947 -0.149544  
16

2055.226788 Kcal/mol 89.123181 eV -98.108466 H  
Original2D\_18\_2.log

6 0.495000 -0.259286 0.000000  
6 1.815000 -1.579286 0.000000  
6 0.495000 -1.579286 0.000000  
8 -0.825000 1.060714 -0.000000  
6 1.815000 -2.899286 0.000000  
6 0.495000 1.060714 -0.000000  
6 -0.825000 2.380714 -0.000000  
6 0.495000 2.380714 -0.000000  
12 -0.825000 -1.579286 0.000000  
6 -3.465000 -2.899286 0.000000  
6 0.495000 3.700714 -0.000000  
8 1.815000 1.060714 -0.000000  
6 -4.785000 -2.899286 0.000000  
12 1.815000 -0.259286 -0.000000  
6 -2.145000 1.060714 -0.000000  
6 1.815000 2.380714 -0.000000

16

2056.707847 Kcal/mol 89.187406 eV -98.106106 H  
Original3D\_0\_69.log

12 1.392137 -0.918772 0.023012  
6 4.017241 -0.486924 0.501980  
8 -1.441502 -2.111345 0.498018  
6 -0.093973 1.621422 0.604379  
6 -2.761389 -2.732963 0.331756  
12 3.246139 1.434165 -0.490326  
8 -3.192551 -1.848384 -0.648822  
6 -3.335514 0.961705 -0.689020  
6 0.598692 1.220074 1.739974  
6 -1.030866 2.189014 0.014813  
6 3.299534 -2.768775 -0.362642  
6 -1.575996 4.352917 -0.206621  
6 4.803875 -0.542320 -0.469736  
6 -2.136205 -0.726402 -0.136159  
6 -1.797902 0.969652 -0.631260  
6 -3.085312 0.191455 0.438236

16

2070.606471 Kcal/mol 89.790108 eV -98.083957 H MutI\_1\_71.log

6 0.533897 2.981345 -0.442970  
6 -0.447964 0.139418 0.183170  
12 4.364723 -1.927616 0.316833  
6 -1.531847 1.914432 0.333874  
6 -3.209214 -1.547501 -1.155643  
6 -2.405645 -0.761521 -0.360165  
6 0.955514 1.803696 -0.250213  
8 1.059329 0.401847 0.017372  
12 -3.622015 -0.024076 1.753312  
6 1.883639 4.483727 -0.837763  
6 -4.017055 -2.129893 -1.956532  
6 2.195938 -0.390122 0.002385  
8 2.579535 -1.765812 0.271913



|             |           |           |            |                                 |
|-------------|-----------|-----------|------------|---------------------------------|
| 6           | -0.949525 | -0.795274 | -0.533200  |                                 |
| 6           | -2.801875 | 0.310282  | 0.482689   |                                 |
| 6           | 3.456901  | -0.286587 | 0.008366   |                                 |
| 16          |           |           |            |                                 |
| 2086.676191 | Kcal/mol  | 90.486958 | eV         | -98.058348 H MutI_16_45.log     |
| 6           | 1.619932  | 0.853329  | 0.650452   |                                 |
| 6           | -5.558201 | -2.680750 | 0.640701   |                                 |
| 6           | -3.466701 | 0.765970  | -1.139358  |                                 |
| 8           | -2.492096 | 0.613376  | -0.154687  |                                 |
| 8           | 6.854815  | -1.576781 | -1.228856  |                                 |
| 6           | 1.448680  | -0.527227 | 0.175227   |                                 |
| 6           | 3.968750  | -0.307418 | 0.516738   |                                 |
| 6           | -4.336790 | 0.710858  | -2.050677  |                                 |
| 6           | 0.250729  | 3.114410  | 0.912246   |                                 |
| 6           | 0.993739  | 2.084083  | 0.829785   |                                 |
| 6           | 2.681161  | -0.026412 | 0.646309   |                                 |
| 6           | -4.401641 | -2.569419 | 1.226194   |                                 |
| 6           | 6.116037  | -1.119750 | -0.425353  |                                 |
| 12          | -4.118113 | -0.963268 | -0.112152  |                                 |
| 12          | -1.058313 | 1.791464  | -0.152346  |                                 |
| 6           | 5.220200  | -0.669525 | 0.391456   |                                 |
| 16          |           |           |            |                                 |
| 2122.561197 | Kcal/mol  | 92.043081 | eV         | -98.001161 H Child_1_13.log     |
| 6           | -0.820557 | 4.299454  | -0.000000  |                                 |
| 6           | 0.630824  | -5.407440 | 0.000000   |                                 |
| 6           | -0.499821 | 3.020437  | -0.000000  |                                 |
| 6           | -3.607375 | -2.197156 | 0.000000   |                                 |
| 12          | 2.758371  | 1.631475  | -0.000000  |                                 |
| 6           | 0.840367  | -3.827754 | 0.000000   |                                 |
| 6           | 0.734185  | 2.175978  | -0.000000  |                                 |
| 6           | -1.788891 | -2.468871 | 0.000000   |                                 |
| 6           | 4.448217  | 0.510371  | -0.000000  |                                 |
| 8           | -2.561695 | -1.351112 | 0.000000   |                                 |
| 6           | -1.332450 | 1.657066  | -0.000000  |                                 |
| 12          | 0.402783  | -1.023040 | 0.000000   |                                 |
| 6           | 0.000000  | 1.021431  | -0.000000  |                                 |
| 6           | -2.159542 | 0.696913  | 0.000000   |                                 |
| 6           | 3.976084  | -0.654033 | -0.000000  |                                 |
| 8           | -2.495817 | 1.318663  | -0.000000  |                                 |
| 16          |           |           |            |                                 |
| 2139.063757 | Kcal/mol  | 92.758701 | eV         | -97.974863 H Original1D_6_0.log |
| 6           | 0.000000  | 0.000000  | -8.328804  |                                 |
| 6           | 0.000000  | 0.000000  | -9.628353  |                                 |
| 6           | 0.000000  | 0.000000  | -7.000773  |                                 |
| 6           | 0.000000  | 0.000000  | -5.727803  |                                 |
| 12          | 0.000000  | 0.000000  | -4.268361  |                                 |
| 6           | 0.000000  | 0.000000  | -1.687803  |                                 |
| 6           | 0.000000  | 0.000000  | -0.393287  |                                 |
| 6           | 0.000000  | 0.000000  | 0.960541   |                                 |
| 8           | 0.000000  | 0.000000  | -10.903483 |                                 |
| 6           | 0.000000  | 0.000000  | 2.245456   |                                 |
| 8           | 0.000000  | 0.000000  | 3.570609   |                                 |
| 6           | 0.000000  | 0.000000  | 4.877621   |                                 |
| 6           | 0.000000  | 0.000000  | 6.181203   |                                 |

|    |          |          |           |
|----|----------|----------|-----------|
| 6  | 0.000000 | 0.000000 | 7.469939  |
| 12 | 0.000000 | 0.000000 | 8.931347  |
| 6  | 0.000000 | 0.000000 | 11.483256 |

16

2149.801963 Kcal/mol 93.224354 eV -97.957751 H MutI\_17\_49.log

|    |           |           |           |
|----|-----------|-----------|-----------|
| 6  | 1.353447  | -1.236387 | 0.304402  |
| 6  | 4.862547  | 0.544056  | -0.140982 |
| 12 | -3.307561 | -0.556501 | -0.306983 |
| 6  | -0.303434 | -0.784650 | -0.736983 |
| 6  | 3.577241  | 1.012770  | -0.095623 |
| 6  | 8.585555  | -0.486531 | -0.261223 |
| 6  | 2.420717  | 1.346194  | -0.034590 |
| 12 | 1.270118  | -0.489864 | 1.192780  |
| 6  | -8.813715 | 0.869300  | -0.004470 |
| 6  | 7.310398  | -0.259955 | -0.219553 |
| 6  | -1.533767 | -0.623826 | -0.650192 |
| 6  | -5.207365 | -0.310798 | -0.115915 |
| 6  | 6.044238  | 0.125403  | -0.182848 |
| 8  | -6.266311 | -0.000420 | 0.025237  |
| 6  | -7.454433 | 0.276113  | 0.168616  |
| 8  | 1.191403  | 1.216200  | 0.123087  |

16

2154.400161 Kcal/mol 93.423751 eV -97.950423 H Child\_15\_30.log

|    |           |           |           |
|----|-----------|-----------|-----------|
| 8  | -5.287301 | 0.153354  | -0.141254 |
| 6  | 4.229493  | 2.073918  | 0.138054  |
| 6  | -4.067930 | 0.244473  | -0.162151 |
| 6  | 4.161256  | 0.912865  | -0.274341 |
| 6  | -2.855453 | -0.534738 | -0.098458 |
| 12 | 3.492959  | -0.878130 | -0.314847 |
| 6  | -2.816642 | 0.901148  | -0.239969 |
| 6  | 1.526836  | -1.206406 | 1.325990  |
| 6  | -1.975398 | -1.484453 | -0.016692 |
| 6  | 0.286194  | 2.914815  | 1.282470  |
| 12 | -0.975867 | 1.918974  | -0.343955 |
| 8  | 1.479556  | 0.049222  | -0.940946 |
| 6  | -0.795055 | -1.921260 | 0.108044  |
| 6  | 1.527841  | -1.091243 | -0.791925 |
| 6  | 0.672858  | -1.937057 | -0.039557 |
| 6  | 0.148809  | -1.223851 | 1.529073  |

16

2169.647341 Kcal/mol 94.084932 eV -97.926125 H

Original2D\_5\_2.log

|    |           |           |           |
|----|-----------|-----------|-----------|
| 6  | 0.000000  | -0.073551 | 0.000000  |
| 6  | 1.779218  | 1.278563  | -0.000000 |
| 6  | 0.138226  | 1.363075  | -0.000000 |
| 6  | 0.437700  | 3.137050  | -0.000000 |
| 6  | 1.979673  | 2.717301  | -0.000000 |
| 6  | -0.223846 | -1.535538 | 0.000000  |
| 8  | 1.659191  | -0.311456 | -0.000000 |
| 6  | 2.641153  | 4.089313  | -0.000000 |
| 12 | -1.897261 | -2.413696 | 0.000000  |
| 6  | 1.368184  | -1.980690 | 0.000000  |
| 8  | 3.853367  | 3.665149  | -0.000000 |
| 6  | -1.318709 | 1.834841  | -0.000000 |
| 12 | -4.503096 | -2.990965 | 0.000000  |

|             |           |           |           |                             |
|-------------|-----------|-----------|-----------|-----------------------------|
| 6           | 3.212916  | -0.791022 | -0.000000 |                             |
| 6           | -2.348784 | -4.607818 | 0.000000  |                             |
| 6           | -2.215096 | 0.906207  | 0.000000  |                             |
| 16          |           |           |           |                             |
| 2205.878033 | Kcal/mol  | 95.656046 | eV        | -97.868388 H MutD_16_46.log |
| 12          | 8.211893  | 1.645124  | -0.852904 |                             |
| 6           | 3.057436  | -0.056187 | 0.766623  |                             |
| 6           | 4.561330  | -0.451085 | 0.516431  |                             |
| 6           | -4.375522 | 3.874692  | 0.957840  |                             |
| 6           | -2.019575 | -1.529842 | -0.470360 |                             |
| 6           | 5.360373  | 0.402756  | 0.235348  |                             |
| 6           | -0.443912 | -1.288479 | 1.002418  |                             |
| 6           | -1.747856 | -1.626850 | 1.092498  |                             |
| 6           | -1.631978 | -3.955451 | -0.912275 |                             |
| 6           | -1.720086 | -2.670225 | -1.088078 |                             |
| 6           | -2.389941 | -0.216095 | -0.393344 |                             |
| 8           | -4.604894 | 0.523027  | 0.204532  |                             |
| 12          | -4.345692 | 2.425364  | -0.733352 |                             |
| 8           | 1.951889  | -0.582625 | 0.673544  |                             |
| 6           | -3.564523 | 0.435500  | -0.527380 |                             |
| 6           | 0.719194  | -0.980247 | 0.822022  |                             |
| 16          |           |           |           |                             |
| 2266.650832 | Kcal/mol  | 98.291407 | eV        | -97.771540 H MutI_18_61.log |
| 6           | -0.911951 | -1.976975 | 0.136567  |                             |
| 6           | 1.841082  | -0.892429 | 0.069340  |                             |
| 6           | 6.352963  | -0.836026 | -0.354633 |                             |
| 8           | -3.927252 | -1.019895 | 0.003932  |                             |
| 8           | -0.340265 | -0.123585 | 0.070203  |                             |
| 6           | 2.961067  | 3.016279  | 0.555772  |                             |
| 6           | -1.759441 | 2.959814  | -0.265895 |                             |
| 6           | 2.862007  | -0.891330 | 0.002407  |                             |
| 12          | 4.691413  | -0.833726 | -0.141672 |                             |
| 6           | -0.280696 | 1.804598  | -0.090185 |                             |
| 6           | 0.463610  | -1.137668 | 0.100977  |                             |
| 6           | 1.623867  | 2.484293  | 0.287340  |                             |
| 6           | -4.067757 | 0.103101  | -0.085479 |                             |
| 6           | -2.907463 | 2.295827  | -0.249666 |                             |
| 6           | -3.764028 | 1.281906  | -0.192460 |                             |
| 12          | -3.053031 | -2.509649 | 0.135206  |                             |
| 16          |           |           |           |                             |
| 2291.728499 | Kcal/mol  | 99.378879 | eV        | -97.731576 H MutI_15_47.log |
| 12          | -2.394265 | -3.153102 | -0.439303 |                             |
| 8           | 1.023610  | 1.396029  | -0.177496 |                             |
| 12          | 1.102103  | 3.080250  | -0.295452 |                             |
| 6           | -0.393501 | -1.964009 | -0.539164 |                             |
| 6           | 4.744380  | -1.397004 | 0.649414  |                             |
| 6           | -3.772687 | -0.236116 | 0.456809  |                             |
| 6           | 0.192965  | -0.247165 | -0.760483 |                             |
| 6           | 3.554695  | -0.906517 | 0.412910  |                             |
| 6           | 1.117656  | -0.984853 | -0.307478 |                             |
| 6           | 5.814235  | -1.974417 | 0.766415  |                             |
| 6           | -3.210160 | -1.237358 | 0.221373  |                             |
| 6           | 2.235273  | -0.534348 | 0.147764  |                             |
| 6           | -1.062841 | -0.012547 | -1.037381 |                             |
| 6           | -4.094448 | 1.935295  | 1.029106  |                             |

|                                                 |           |           |           |                |
|-------------------------------------------------|-----------|-----------|-----------|----------------|
| 6                                               | 1.408173  | 4.717219  | -0.382667 |                |
| 8                                               | -3.985672 | 0.844613  | 0.787166  |                |
| 16                                              |           |           |           |                |
| 2344.678693 Kcal/mol 101.675019 eV -97.647194 H |           |           |           | MutI_11_79.log |
| 6                                               | -5.095972 | -2.134287 | 0.005976  |                |
| 6                                               | -2.618557 | -1.942742 | -0.225328 |                |
| 12                                              | -0.921078 | -1.557065 | -0.270207 |                |
| 6                                               | 2.614643  | -1.580607 | 3.587150  |                |
| 6                                               | -3.816159 | -2.046310 | -0.112986 |                |
| 6                                               | 1.736303  | -0.749705 | -0.331432 |                |
| 6                                               | -6.380930 | -2.184817 | -0.013183 |                |
| 6                                               | 6.985337  | 1.428328  | -0.274335 |                |
| 6                                               | 0.685173  | -1.110688 | -0.321859 |                |
| 12                                              | 5.470855  | 0.633084  | -0.287340 |                |
| 6                                               | -7.617389 | -2.041314 | -0.474769 |                |
| 6                                               | -6.781040 | 5.943641  | -0.160454 |                |
| 8                                               | 4.025726  | 0.033874  | -0.400943 |                |
| 6                                               | 8.067459  | 1.984495  | -0.254808 |                |
| 8                                               | 2.925000  | -0.363484 | -0.347669 |                |
| 6                                               | -6.146059 | 6.721449  | 0.689272  |                |
| 16                                              |           |           |           |                |
| 2378.052375 Kcal/mol 103.122241 eV -97.594010 H |           |           |           |                |
| Original2D_7_2.log                              |           |           |           |                |
| 6                                               | -2.352813 | -0.893982 | -0.000000 |                |
| 6                                               | -1.690748 | 0.268060  | 0.000000  |                |
| 6                                               | -0.000000 | 1.022999  | 0.000000  |                |
| 8                                               | 1.275329  | -0.328340 | -0.000000 |                |
| 12                                              | -0.460966 | -1.469500 | -0.000000 |                |
| 6                                               | -2.129623 | 1.696291  | 0.000000  |                |
| 6                                               | -1.258473 | 3.899615  | 0.000000  |                |
| 12                                              | -3.875138 | 0.651500  | 0.000000  |                |
| 6                                               | -1.033022 | 2.521289  | 0.000000  |                |
| 6                                               | 1.857227  | -1.437348 | -0.000000 |                |
| 6                                               | 1.031696  | 1.862583  | 0.000000  |                |
| 6                                               | 1.544265  | -3.129049 | -0.000000 |                |
| 8                                               | 4.336874  | -2.303244 | -0.000000 |                |
| 6                                               | 2.736501  | -2.386729 | -0.000000 |                |
| 6                                               | 3.780038  | -3.545228 | -0.000000 |                |
| 6                                               | -1.295777 | 5.266278  | 0.000000  |                |
| 16                                              |           |           |           |                |
| 2394.315153 Kcal/mol 103.827463 eV -97.568094 H |           |           |           | MutI_14_43.log |
| 12                                              | 5.526381  | -0.214007 | -0.283458 |                |
| 8                                               | 3.225843  | 0.848758  | -0.158289 |                |
| 6                                               | -8.910009 | 0.639991  | -0.231848 |                |
| 6                                               | -6.349522 | 0.139723  | -0.133830 |                |
| 6                                               | 2.367152  | -1.308680 | 0.271092  |                |
| 6                                               | -5.181887 | -0.097569 | -0.090217 |                |
| 6                                               | -4.160653 | -0.265231 | -0.048596 |                |
| 6                                               | -7.528775 | 0.369298  | -0.176064 |                |
| 6                                               | 3.744959  | -1.708008 | 0.159473  |                |
| 6                                               | 4.905533  | -1.914068 | 0.079667  |                |
| 8                                               | 5.328935  | 1.503053  | -0.558873 |                |
| 6                                               | 2.163494  | 2.348431  | 0.247330  |                |
| 12                                              | -2.415355 | -0.780138 | 0.083975  |                |
| 6                                               | 0.528460  | -1.656914 | 0.317324  |                |

|             |           |            |           |            |                  |
|-------------|-----------|------------|-----------|------------|------------------|
| 6           | -0.804923 | -1.257838  | 0.244762  |            |                  |
| 6           | 1.597749  | 3.563407   | 0.716089  |            |                  |
| 16          |           |            |           |            |                  |
| 2575.941611 | Kcal/mol  | 111.703541 | eV        | -97.278653 | H MutI_12_69.log |
| 12          | -0.463124 | -0.789067  | -1.229025 |            |                  |
| 6           | -4.050166 | -0.926287  | 0.741000  |            |                  |
| 6           | 0.865085  | 0.308370   | -1.358696 |            |                  |
| 8           | -3.367690 | 1.638757   | 0.166184  |            |                  |
| 6           | 1.214666  | 1.695276   | 0.823608  |            |                  |
| 6           | 2.121114  | -0.498327  | -0.741767 |            |                  |
| 6           | 4.357076  | -1.355912  | 0.759543  |            |                  |
| 6           | 2.436460  | 0.987915   | -0.146176 |            |                  |
| 8           | -1.603752 | -1.779019  | -0.626108 |            |                  |
| 6           | -1.732995 | -0.569838  | 2.442890  |            |                  |
| 6           | 1.078726  | 1.825589   | -0.543973 |            |                  |
| 12          | 3.994582  | 0.573527   | 0.583308  |            |                  |
| 6           | 3.251429  | -1.562875  | 0.089180  |            |                  |
| 6           | -3.973655 | 0.062710   | 0.466865  |            |                  |
| 6           | -2.802366 | 2.970035   | -0.549019 |            |                  |
| 6           | -3.199699 | -2.318560  | -0.078788 |            |                  |
| 16          |           |            |           |            |                  |
| 2606.441935 | Kcal/mol  | 113.026162 | eV        | -97.230048 | H MutI_15_37.log |
| 6           | -5.716323 | 0.233560   | 0.919677  |            |                  |
| 8           | 5.282761  | 0.611581   | 0.701274  |            |                  |
| 6           | -4.761165 | 3.882829   | -0.286996 |            |                  |
| 6           | -2.620215 | -2.623135  | 0.096520  |            |                  |
| 6           | -5.274495 | 2.553866   | 0.261688  |            |                  |
| 6           | -5.623588 | 1.419177   | 0.703377  |            |                  |
| 6           | -5.551549 | -1.070845  | 1.068754  |            |                  |
| 12          | 2.248095  | 0.315724   | -1.294411 |            |                  |
| 8           | -0.244505 | -1.843654  | -1.058022 |            |                  |
| 6           | 3.843206  | 1.611984   | -0.838681 |            |                  |
| 6           | 4.489332  | 1.091844   | -0.114783 |            |                  |
| 6           | -1.275661 | -2.392468  | -0.506279 |            |                  |
| 6           | 6.965178  | -0.363284  | 2.399191  |            |                  |
| 12          | 1.216350  | -0.446011  | -1.509034 |            |                  |
| 6           | -4.249862 | -2.558009  | 0.827244  |            |                  |
| 6           | 6.128576  | 0.117818   | 1.552840  |            |                  |
| 16          |           |            |           |            |                  |
| 2664.896430 | Kcal/mol  | 115.560992 | eV        | -97.136895 | H Child_9_9.log  |
| 8           | 3.523962  | 0.105875   | 1.523219  |            |                  |
| 8           | -4.890050 | -0.180843  | -0.681719 |            |                  |
| 6           | 2.664689  | -0.014769  | 0.688291  |            |                  |
| 6           | -3.893384 | -0.275667  | -0.077636 |            |                  |
| 6           | 2.080645  | -1.031088  | -0.005007 |            |                  |
| 6           | -2.736442 | -0.378215  | 0.618833  |            |                  |
| 6           | 1.891476  | 0.728910   | -0.366716 |            |                  |
| 12          | -0.895378 | -2.964750  | 0.051059  |            |                  |
| 12          | 0.513186  | 2.342144   | -0.103852 |            |                  |
| 6           | -2.001540 | -1.287476  | 1.020007  |            |                  |
| 6           | -1.233736 | 3.168524   | 0.294442  |            |                  |
| 6           | 1.933703  | -3.180879  | -0.755204 |            |                  |
| 6           | 1.938666  | -0.233222  | -1.428788 |            |                  |
| 6           | -2.335051 | 2.543500   | 0.515845  |            |                  |
| 6           | 2.213726  | 3.246373   | -1.103372 |            |                  |

|                                                 |            |           |           |                |
|-------------------------------------------------|------------|-----------|-----------|----------------|
| 6                                               | 2.063085   | -1.940820 | -0.417108 |                |
| 16                                              |            |           |           |                |
| 2682.386332 Kcal/mol 116.319427 eV -97.109023 H |            |           |           | MutI_3_67.log  |
| 6                                               | -1.536830  | -0.594056 | -1.010326 |                |
| 6                                               | 2.566289   | -1.441873 | -0.578825 |                |
| 12                                              | 0.087527   | 2.422150  | 0.249064  |                |
| 12                                              | 1.939917   | -1.247682 | 1.476546  |                |
| 6                                               | 0.273941   | -2.196126 | -0.699881 |                |
| 8                                               | 3.212009   | 0.886412  | -0.719424 |                |
| 6                                               | -0.673280  | -1.565265 | -0.895379 |                |
| 6                                               | -1.896164  | 1.589990  | -0.601189 |                |
| 6                                               | -4.664296  | -1.429785 | 1.329956  |                |
| 6                                               | 1.947682   | 0.752965  | 1.586745  |                |
| 6                                               | 1.500468   | -2.323340 | -0.419462 |                |
| 6                                               | 1.968083   | 1.692291  | 0.744506  |                |
| 6                                               | -1.996480  | 2.804168  | -0.228457 |                |
| 8                                               | -2.456245  | 0.402441  | -1.113886 |                |
| 6                                               | -5.636499  | -1.042398 | 0.620733  |                |
| 6                                               | 3.084515   | -0.313976 | -0.855230 |                |
| 16                                              |            |           |           |                |
| 2691.303478 Kcal/mol 116.706112 eV -97.094812 H |            |           |           | Child_5_55.log |
| 6                                               | 0.934156   | -1.668991 | -1.084831 |                |
| 6                                               | -11.266916 | 1.286539  | 0.097059  |                |
| 12                                              | 2.959753   | -1.738279 | -0.409900 |                |
| 8                                               | -10.852360 | 0.525988  | 0.851074  |                |
| 8                                               | -0.167589  | -1.869919 | -0.306673 |                |
| 6                                               | 1.542913   | 2.859386  | -1.419785 |                |
| 6                                               | -1.322489  | -1.318866 | -0.706992 |                |
| 6                                               | 3.736208   | 1.248307  | 0.703213  |                |
| 6                                               | 2.310436   | 2.095212  | -0.695541 |                |
| 6                                               | -2.400447  | -0.743777 | -1.055698 |                |
| 6                                               | 3.988503   | 2.106330  | -0.409647 |                |
| 6                                               | 4.272693   | -0.247708 | 0.225521  |                |
| 6                                               | -5.644902  | -1.185268 | -0.042990 |                |
| 6                                               | 2.440005   | 0.945774  | 0.174592  |                |
| 6                                               | 3.504566   | 0.680093  | 0.559591  |                |
| 12                                              | 3.339517   | -0.394282 | 1.874721  |                |
| 16                                              |            |           |           |                |
| 2733.559909 Kcal/mol 118.538526 eV -97.027472 H |            |           |           | Child_7_49.log |
| 12                                              | -4.305558  | 0.403285  | -0.245297 |                |
| 8                                               | 4.159609   | -0.655309 | -0.246260 |                |
| 6                                               | -4.469848  | -1.618845 | -0.122861 |                |
| 6                                               | 3.304823   | -1.735953 | -0.170866 |                |
| 6                                               | -2.425466  | 0.804179  | 0.085139  |                |
| 6                                               | 3.678812   | 0.459720  | -0.159171 |                |
| 6                                               | -3.084432  | -1.625614 | -0.080533 |                |
| 6                                               | 2.231267   | -2.404731 | -0.078787 |                |
| 6                                               | -1.869348  | -0.383926 | 0.101556  |                |
| 6                                               | 3.159532   | 1.611123  | -0.075530 |                |
| 6                                               | -0.051261  | 4.283572  | -0.553365 |                |
| 6                                               | 1.108812   | -2.996111 | 0.038220  |                |
| 6                                               | -0.985788  | 0.914702  | 0.280537  |                |
| 6                                               | -0.229557  | -3.247297 | 0.270054  |                |
| 12                                              | 0.150177   | 2.030006  | 0.493012  |                |
| 8                                               | 1.797802   | 1.459758  | 0.223892  |                |

16  
 2768.109353 Kcal/mol 120.036734 eV -96.972414 H Child\_3\_34.log  
 6 -5.789239 -1.670960 0.129760  
 6 3.003282 0.645042 -0.793364  
 6 -4.498592 -1.520611 -0.169366  
 6 3.735529 -0.419255 -0.868198  
 12 -2.724953 -0.895152 -0.603989  
 12 1.060276 1.129431 -1.301598  
 8 4.435571 -1.429409 -0.954964  
 6 -1.298246 0.197461 0.703352  
 6 -2.607796 1.080601 -0.286782  
 6 0.802789 1.738956 1.398794  
 6 -2.527555 2.274417 0.622745  
 6 -0.257950 1.485174 0.698530  
 8 2.158185 -0.973564 1.232714  
 6 -0.987359 0.961709 -0.578871  
 6 1.043822 -1.335412 0.945523  
 6 3.918990 -0.701715 1.638719

16  
 2796.356981 Kcal/mol 121.261669 eV -96.927399 H Child\_3\_60.log  
 6 -7.573826 1.217225 0.238287  
 12 3.365809 -1.304387 -0.659511  
 12 -5.443396 0.807278 0.074091  
 6 -3.478602 0.395499 -0.078812  
 6 -1.549570 -2.079562 -0.608486  
 8 4.264267 3.081228 0.307319  
 6 0.928584 -1.159060 -0.156328  
 8 -2.298894 0.072936 -0.161133  
 6 1.577677 -0.207164 -1.000382  
 6 4.009450 2.032334 -0.173478  
 6 -0.433633 -1.112975 -0.600257  
 6 -1.236993 -0.459326 -0.263201  
 6 2.228128 -1.169995 2.374664  
 6 3.645909 0.944865 -0.904830  
 6 -0.029413 -1.315365 1.142859  
 6 3.446964 -0.297811 1.005892

16  
 2887.060330 Kcal/mol 125.194943 eV -96.782854 H  
 Original3D\_0\_35.log  
 8 -0.593097 -1.069216 0.663458  
 6 1.952826 -0.440988 1.751831  
 8 -0.165509 1.164074 0.029759  
 6 -2.160850 -0.691477 0.909094  
 6 2.648291 -0.578893 0.405578  
 6 -0.559474 1.431547 -1.003893  
 6 -2.799760 -0.948103 -0.181491  
 6 -1.302820 -1.046587 1.932670  
 6 3.369835 -0.041746 1.348986  
 12 -2.564898 1.475054 -0.061016  
 6 -2.072283 -2.921541 -1.343232  
 6 2.308779 -0.382647 -0.985336  
 6 -2.495255 4.260855 -0.028774  
 12 4.293957 0.546880 -0.588886  
 6 1.633813 -0.604084 -1.770274  
 6 -2.969745 -2.206681 -0.659645

16  
 2984.118610 Kcal/mol 129.403794 eV -96.628181 H MutI\_8\_77.log  
 8 1.232942 1.397163 0.492112  
 12 7.001334 -2.253813 -0.577216  
 6 -0.872120 -1.541039 0.913320  
 6 3.794325 3.924325 -0.167694  
 6 -3.579604 0.880631 -0.316814  
 6 2.104931 2.124938 0.218686  
 8 -4.174874 -1.444398 -0.251948  
 6 -5.787522 0.076637 -0.721816  
 6 5.165475 -2.352226 0.186886  
 6 -4.517519 -0.154694 -0.434929  
 6 -0.246938 -0.650460 0.495287  
 6 -0.206172 0.781315 0.078066  
 6 2.972212 3.004196 0.038573  
 12 -2.586730 -2.407861 0.306879  
 6 -1.286791 1.925712 0.038032  
 6 -2.446909 1.366991 -0.107140

16  
 2988.859415 Kcal/mol 129.609375 eV -96.620626 H  
 Original3D\_12\_3.log

6 2.021271 0.296730 -2.051166  
 6 2.428547 0.499833 -0.691636  
 6 0.882163 0.868316 -2.216524  
 6 3.060164 0.995717 -0.104937  
 12 0.190399 0.189996 -0.285561  
 8 2.482384 -1.386203 1.163854  
 6 -2.297662 2.171749 0.202473  
 6 3.372406 1.969377 0.928542  
 8 -3.083152 2.575097 -1.041394  
 6 -0.635826 -2.693736 -0.576769  
 6 2.536667 -1.355292 -0.050240  
 6 -2.365500 0.894357 1.134295  
 6 -2.267741 1.641270 2.243157  
 6 0.837965 -0.737338 2.471332  
 6 -1.079655 -1.932383 0.100839  
 12 -3.036286 -2.291892 -0.490761

16  
 3029.550347 Kcal/mol 131.373903 eV -96.555781 H MutD\_13\_58.log

12 -1.742509 0.795377 -1.285267  
 8 5.941166 -2.944754 -0.533230  
 6 1.335602 0.993452 0.122711  
 6 1.034809 0.445078 1.758844  
 8 -5.001590 -1.859468 -0.663301  
 6 1.672895 3.221939 0.017840  
 6 0.650966 2.191018 0.235550  
 6 -0.167398 -1.458171 1.198469  
 6 -2.168769 -1.353543 -0.228075  
 6 -2.508633 1.165434 -1.052677  
 6 -3.520431 -1.368732 -0.034625  
 6 7.220549 -2.974551 -0.188397  
 6 5.395984 4.141911 -0.696493  
 6 -1.144328 -1.906823 0.576879  
 6 -2.031836 -0.017908 -0.834709  
 12 -1.768581 0.867885 1.645295



16  
 3043.984709 Kcal/mol 131.999837 eV -96.532779 H MutI\_15\_59.log  
 6 4.711963 1.750826 0.000000  
 6 -1.852963 0.342119 0.000000  
 12 -3.039684 2.628111 0.000000  
 6 3.201679 1.189535 0.000000  
 6 -4.076098 4.265959 0.000000  
 6 -3.014039 -0.605944 0.000000  
 6 2.994613 -0.261350 0.000000  
 6 -0.415801 -4.660027 0.000000  
 6 4.607309 0.258754 0.000000  
 8 4.860117 -0.984548 0.000000  
 6 -3.363879 0.523266 0.000000  
 6 0.909145 3.225836 0.000000  
 8 -0.229584 -3.487968 0.000000  
 6 0.132896 -1.764872 0.000000  
 12 -1.964752 -2.172512 0.000000  
 6 0.000000 0.788053 0.000000

16  
 3049.496874 Kcal/mol 132.238867 eV -96.523994 H Child\_14\_15.log  
 8 -9.533817 -2.416464 -0.956777  
 6 4.953233 -0.382002 -0.826894  
 6 -0.772562 6.059183 -0.293080  
 6 3.628152 -0.905696 -0.570449  
 6 -2.284188 2.422688 0.390833  
 6 1.650522 -2.135792 -1.411155  
 6 -2.606683 -0.946922 2.316493  
 6 4.178173 0.006716 0.333389  
 6 -1.468989 3.653995 -0.455694  
 6 2.304441 -1.399466 -0.450678  
 6 -0.545889 4.953504 -0.885909  
 8 0.108007 -2.117187 -0.496009  
 6 -1.969645 -1.904791 -0.311056  
 6 3.349764 0.336347 1.363504  
 12 2.633169 -1.593449 0.081710  
 12 -1.557460 -0.262999 1.287161

16  
 3107.465823 Kcal/mol 134.752642 eV -96.431615 H Child\_2\_19.log  
 8 -8.992162 -2.491788 -0.004933  
 6 0.888674 3.255769 -0.818592  
 6 -9.076872 -2.332650 -1.127881  
 6 4.854356 -0.654256 -1.436889  
 6 1.695872 -1.572955 1.186945  
 6 -0.184389 2.445508 -0.652740  
 12 3.374675 -2.605679 0.709561  
 6 1.125447 1.795605 -0.494372  
 6 -2.903087 2.153401 2.277279  
 8 5.937538 -0.817598 -0.002744  
 6 1.317253 -0.594355 0.619744  
 6 -1.464659 1.809144 -0.569298  
 6 1.390626 0.659206 -0.270681  
 12 -1.322367 1.835863 0.882773  
 6 -2.376990 1.020832 -1.075127  
 6 4.701984 -2.033101 -0.812819

3148.777607 Kcal/mol 136.544093 eV -96.365780 H MutI\_3\_69.log

|    |           |           |           |
|----|-----------|-----------|-----------|
| 6  | 1.251510  | 4.500573  | -0.157730 |
| 8  | -0.497468 | 1.645477  | -0.254635 |
| 12 | 3.194210  | -3.618198 | 0.248153  |
| 6  | 5.162312  | -0.813743 | 0.154633  |
| 12 | -4.889594 | -3.551405 | 0.044232  |
| 6  | -3.983587 | 1.300607  | -0.034411 |
| 6  | 3.967339  | -1.916692 | 0.045986  |
| 6  | -1.574790 | 1.999125  | -0.051074 |
| 6  | 2.994219  | -0.836081 | -0.122092 |
| 6  | -4.646791 | -1.467430 | -0.132063 |
| 6  | -2.762306 | 2.453777  | 0.162167  |
| 6  | 2.251063  | 0.284670  | -0.257239 |
| 6  | 3.653907  | 0.436256  | -0.335367 |
| 6  | -4.202222 | -0.116164 | 0.084802  |
| 6  | 0.489997  | 5.286142  | 0.657762  |
| 8  | 1.090056  | 0.775647  | -0.195473 |

16

3192.809528 Kcal/mol 138.453500 eV -96.295611 H Child\_1\_41.log

|    |           |           |           |
|----|-----------|-----------|-----------|
| 6  | -4.715323 | 0.775644  | 1.349446  |
| 12 | 5.053758  | -1.305458 | 0.263232  |
| 6  | -4.079722 | -0.041400 | 0.640177  |
| 6  | 3.472058  | -3.783884 | 0.264846  |
| 6  | -3.946838 | -1.145452 | -0.027962 |
| 8  | 3.254196  | -0.805612 | 0.176267  |
| 8  | -3.798011 | -2.257517 | -0.698466 |
| 6  | 3.701495  | 0.909218  | 0.147264  |
| 12 | -1.052848 | 1.398281  | -0.256530 |
| 6  | 0.683241  | 4.555320  | -0.411260 |
| 6  | -1.529754 | -0.623971 | -0.020033 |
| 6  | 1.865520  | 3.781205  | -0.205027 |
| 6  | 0.450849  | 3.394388  | 0.056559  |
| 6  | -0.137617 | -0.710723 | -0.295630 |
| 6  | -2.593867 | -1.284876 | -0.046313 |
| 6  | -0.446777 | -1.926942 | -0.769207 |

16

3325.703292 Kcal/mol 144.216326 eV -96.083831 H

Original3D\_10\_3.log

|    |           |           |           |
|----|-----------|-----------|-----------|
| 12 | 2.731002  | 1.059734  | 0.173104  |
| 6  | 5.443019  | 1.054004  | 0.357158  |
| 8  | 0.748969  | -0.389116 | -0.664437 |
| 6  | -0.728493 | -0.342861 | -0.934485 |
| 6  | 1.107397  | 3.810365  | 0.072369  |
| 6  | -0.503946 | -2.600562 | 0.168505  |
| 6  | -1.172240 | -1.709299 | -0.810627 |
| 6  | -2.422424 | 2.197502  | -0.090043 |
| 12 | -2.927833 | -0.697355 | -0.588309 |
| 6  | -3.256728 | 2.768667  | -0.077442 |
| 6  | -3.232574 | 3.958905  | 0.603642  |
| 6  | 0.647436  | -2.890555 | -0.705019 |
| 8  | 0.093171  | -1.813758 | 1.351430  |
| 6  | 1.113382  | -1.623206 | 0.168135  |
| 6  | -2.737643 | -2.596144 | 1.489020  |
| 6  | 5.013623  | 0.185592  | -0.326792 |

16

3438.846845 Kcal/mol 149.122701 eV -95.903525 H MutD\_14\_74.log

|    |           |           |           |
|----|-----------|-----------|-----------|
| 6  | -4.097834 | -0.362011 | 0.325017  |
| 6  | 5.432380  | 0.326351  | -0.427997 |
| 12 | -3.099671 | 1.050247  | -1.166283 |
| 6  | 7.915220  | -0.690837 | 1.668488  |
| 6  | -0.861398 | 0.415965  | -1.002569 |
| 6  | 1.745916  | 0.059134  | -0.763600 |
| 6  | -3.006673 | 4.437737  | 0.970597  |
| 6  | -3.699475 | -2.560366 | 0.668804  |
| 8  | 6.502251  | -0.094050 | 0.074129  |
| 12 | -1.593869 | -2.046023 | -0.143805 |
| 6  | -2.929913 | -3.535467 | 0.843289  |
| 8  | -2.324796 | 3.530728  | 1.112544  |
| 6  | 2.928908  | 0.345535  | -0.642072 |
| 6  | 0.349126  | 0.097128  | -0.705517 |
| 6  | 4.208657  | 0.238463  | -0.422750 |
| 6  | -4.167775 | -1.362319 | 0.526254  |

16

3503.404449 Kcal/mol 151.922187 eV -95.800646 H MutD\_15\_62.log

|    |           |           |           |
|----|-----------|-----------|-----------|
| 6  | -4.000014 | 0.367945  | -0.684519 |
| 6  | -2.996779 | -2.731076 | 0.512121  |
| 8  | 2.615363  | 3.030662  | 0.049737  |
| 6  | 2.415784  | 3.773046  | 1.300668  |
| 6  | 4.458995  | -2.147647 | -0.573138 |
| 6  | -2.930983 | 0.206732  | 0.014973  |
| 12 | 1.325374  | 1.396534  | -0.342763 |
| 6  | -1.799045 | -1.910752 | 0.861570  |
| 6  | -1.839591 | 1.012578  | -0.273376 |
| 12 | 0.192097  | -1.421586 | 0.515986  |
| 6  | 2.061018  | -0.521055 | 0.133668  |
| 6  | -0.711698 | 1.455986  | -0.426339 |
| 6  | 3.121622  | -1.144247 | -0.152049 |
| 6  | -2.825591 | -1.138877 | 0.556439  |
| 6  | 5.552855  | -2.298204 | -0.698867 |
| 8  | -5.271500 | 0.813594  | -0.737935 |

16

3682.598018 Kcal/mol 159.692766 eV -95.515083 H

Original3D\_0\_37.log

|    |           |           |           |
|----|-----------|-----------|-----------|
| 6  | -2.142495 | -1.208232 | -0.814380 |
| 6  | -1.560337 | -1.094223 | 0.076826  |
| 8  | -4.418245 | -0.585548 | -1.162548 |
| 6  | -4.287452 | 0.572073  | -0.462129 |
| 12 | 0.177880  | -0.260494 | 1.091223  |
| 12 | 3.465704  | 0.450271  | 1.151813  |
| 8  | 4.120419  | -1.794545 | -0.606145 |
| 6  | 1.795431  | 2.836866  | -0.824598 |
| 6  | 2.877338  | -1.360238 | -0.758758 |
| 6  | 1.234494  | 2.795611  | -1.549484 |
| 6  | 2.588182  | 2.736207  | 0.151676  |
| 6  | 3.295918  | -2.077957 | -1.770695 |
| 6  | -4.475856 | 1.287907  | 0.345342  |
| 6  | -2.979839 | -0.698422 | -1.833257 |
| 6  | -1.264302 | -2.270775 | 2.937428  |
| 6  | -1.971148 | 1.275087  | 2.374214  |

16

3687.093438 Kcal/mol 159.887706 eV -95.507919 H Child\_4\_23.log

|    |           |           |           |
|----|-----------|-----------|-----------|
| 6  | 8.364755  | -0.020391 | -0.393908 |
| 6  | -6.045806 | -2.970580 | -0.860204 |
| 6  | 7.059237  | -0.136966 | -0.315234 |
| 6  | -3.528865 | 2.873414  | -0.108471 |
| 6  | 5.727001  | -0.253044 | -0.216559 |
| 8  | -4.692996 | 2.706184  | -0.779827 |
| 6  | 4.483224  | -0.149307 | -0.100280 |
| 6  | -4.818918 | -2.500760 | -0.278708 |
| 8  | 3.229074  | -0.551116 | 0.011896  |
| 12 | -1.158090 | 1.636839  | 0.546174  |
| 6  | 2.216863  | 0.382276  | -0.035874 |
| 6  | -3.784558 | -2.174085 | 0.179303  |
| 6  | 0.977441  | -0.185079 | 0.197769  |
| 6  | -2.850136 | 2.975437  | 0.258483  |
| 6  | -0.290712 | -0.296772 | 0.391696  |
| 12 | -1.620725 | -1.845622 | 0.606774  |

16

3738.800678 Kcal/mol 162.129947 eV -95.425518 H Child\_4\_31.log

|    |           |           |           |
|----|-----------|-----------|-----------|
| 6  | 4.030980  | -1.102668 | -0.026716 |
| 6  | -2.586781 | 3.689847  | -0.436927 |
| 12 | 3.673458  | 0.846410  | 0.336790  |
| 6  | -1.184945 | 3.625800  | -0.400672 |
| 6  | 2.828357  | -1.442305 | -0.223549 |
| 6  | -2.743908 | -1.524626 | -0.137706 |
| 6  | 1.966913  | 2.085528  | 0.403144  |
| 8  | -1.246103 | 2.284618  | -0.341016 |
| 12 | 0.820719  | -1.577454 | -0.383883 |
| 6  | -2.808745 | -2.952363 | -0.066680 |
| 6  | 0.916922  | 1.422525  | 0.070230  |
| 6  | -0.644122 | -2.350356 | 0.705208  |
| 6  | -1.301110 | -1.371156 | -0.235141 |
| 6  | 0.009435  | 0.599180  | -0.376633 |
| 6  | -1.497736 | -3.440613 | -0.244905 |
| 8  | -3.234106 | 0.882854  | 1.139415  |

16

3750.522143 Kcal/mol 162.638238 eV -95.406839 H

Original3D\_0\_76.log

|    |           |           |           |
|----|-----------|-----------|-----------|
| 6  | -1.451735 | 0.682994  | -0.582532 |
| 6  | 1.151887  | -0.135830 | -0.853677 |
| 6  | 0.708985  | -1.738658 | 0.950617  |
| 6  | 0.588702  | 0.885234  | 0.124806  |
| 12 | -3.238748 | 0.358506  | -1.047982 |
| 6  | 1.305264  | 2.689929  | 0.511379  |
| 6  | 2.272781  | -1.312301 | 1.122066  |
| 6  | 1.960250  | -1.771714 | -0.534183 |
| 6  | -0.362676 | 1.397926  | -0.978271 |
| 8  | -1.699197 | -1.937627 | 0.199222  |
| 8  | 1.752744  | 3.976021  | 0.841582  |
| 6  | -4.109727 | 1.109258  | 1.905054  |
| 12 | -0.351421 | -1.002744 | -0.419704 |
| 6  | 0.270539  | -2.576342 | 1.851914  |
| 6  | 2.579134  | -0.127191 | -0.212217 |
| 6  | 2.195537  | -0.532688 | -1.757325 |

16

```

3821.173729 Kcal/mol 165.701985 eV -95.294248 H      Child_18_29.log
6      -4.272285   2.817355   -0.062639
6      3.296128    -0.191712  -0.194421
12     -1.605730    1.346222  -0.273650
12     1.333382    -2.279299 -0.364995
6      0.318257    3.259674  -0.459051
6      1.860651    -0.719601 -0.218319
6      -1.709544   -1.408313 -1.328870
6      3.074631    1.301487  -0.119138
6      0.753135    1.983323  -0.583971
6      -0.562372   -2.761205 -0.092916
6      1.372436    0.769678  0.026167
6      -2.274297   -2.576669 1.042920
6      -0.607503   -1.105479 0.146351
8      -0.466378   -0.044774 0.780854
6      -2.095737   -1.513978 0.201842
8      1.509775    1.553470  1.408647
16
3862.482975 Kcal/mol 167.493326 eV -95.228418 H      Child_2_47.log
6      -1.233909   -0.803200 -2.056787
8      -2.010392   -3.478892  1.610161
6      -0.395071   -0.261296 -1.284468
6      -1.674380   -3.137057  0.603030
12     -3.071653    -0.257261 -1.213299
6      0.499345    1.281902  0.647413
8      4.384119    -0.024392 -0.667735
6      10.004982   -0.084564  1.108754
12     2.520498    1.040491  -0.125966
6      -3.599720    1.552982  1.254685
6      0.662348    0.278948  -0.550706
6      -2.112701    1.572360  1.163450
6      -4.790368    0.630374  -0.310980
6      -0.780707    1.546388  1.123747
6      5.278375    -0.774577 -0.696504
6      -3.920851    1.302323  0.420326
16
3922.148501 Kcal/mol 170.080671 eV -95.133334 H      MutD_16_64.log
6      -3.562097    0.764948  -1.114586
6      -2.255755    0.502178  0.925527
6      8.196406     0.049807  -0.277971
6      -3.906939    -1.140145 -1.830241
12     -1.465194     4.126101  0.300960
6      -3.869563    -1.415620 -1.331935
6      -0.314572    -0.196580 0.883571
6      -2.730190    -3.272398 0.100775
6      5.033003     -0.320947 0.095356
8      -6.561459    -0.635893 2.325120
6      -3.373398    -2.437116 -0.659691
8      3.824940     -0.338721 0.353136
6      6.245654     -0.296372 -0.153881
12     1.612462     -0.583492 0.752345
6      -3.639391    2.236455  -1.909257
6      7.531001     -0.259944 -0.405283
16
4212.502980 Kcal/mol 182.671649 eV -94.670625 H      Child_12_58.log

```

|    |           |           |           |
|----|-----------|-----------|-----------|
| 8  | -3.323962 | 4.386967  | -0.053086 |
| 6  | -2.456464 | -2.742687 | -0.102671 |
| 6  | -2.875317 | 3.267600  | -0.003294 |
| 6  | -3.554283 | -2.381050 | -0.297132 |
| 6  | 8.751568  | 1.306628  | -0.265474 |
| 6  | -1.097354 | -2.820510 | 0.078112  |
| 8  | 9.876812  | 1.081435  | -0.183274 |
| 6  | -4.686086 | -1.607454 | -0.670770 |
| 6  | -1.882754 | 2.294798  | 0.082827  |
| 6  | 0.079923  | -2.573168 | 0.153356  |
| 6  | -3.304643 | 1.770207  | -0.090813 |
| 6  | 1.157658  | -2.173885 | -0.310341 |
| 12 | -0.252976 | 0.964120  | 0.427381  |
| 6  | -3.864298 | 0.628827  | -0.169883 |
| 6  | 3.388055  | -1.042538 | -0.526331 |
| 12 | 1.056408  | -1.573106 | 0.791400  |

16

4410.929288 Kcal/mol 191.276239 eV -94.354412 H

Original3D\_3\_7.log

|    |           |           |           |
|----|-----------|-----------|-----------|
| 12 | -2.318762 | -1.103864 | 0.441226  |
| 8  | 0.114747  | -0.163159 | -0.340901 |
| 8  | 2.389433  | -0.758991 | -0.907766 |
| 6  | -5.577931 | -0.868167 | 0.687631  |
| 6  | 0.524779  | -0.008111 | -1.474189 |
| 6  | 0.963611  | 2.055868  | 0.158305  |
| 6  | 3.162864  | 1.454281  | -0.849410 |
| 6  | 2.978138  | -1.840036 | -0.753995 |
| 6  | 1.191360  | 0.858808  | 1.412528  |
| 6  | -5.167697 | 0.553381  | 0.797453  |
| 6  | 4.677258  | 0.717842  | -0.273832 |
| 6  | -6.764853 | -0.491406 | -0.793909 |
| 6  | -5.089376 | 1.752898  | -0.225521 |
| 6  | 0.293840  | -2.860134 | -0.121800 |
| 6  | 0.350049  | 3.092188  | -0.174378 |
| 12 | 4.878289  | -0.490075 | 1.196778  |

16

4540.637253 Kcal/mol 196.900915 eV -94.147709 H

Child\_18\_12.log

|    |           |           |           |
|----|-----------|-----------|-----------|
| 12 | 2.583443  | -1.579931 | -0.271422 |
| 6  | -1.869913 | 4.468520  | -1.377423 |
| 6  | 0.469326  | -1.619197 | -0.489183 |
| 12 | -0.975522 | 1.226776  | 1.980429  |
| 6  | -1.070381 | -2.119452 | -0.691713 |
| 6  | -2.512316 | -0.910965 | 1.014064  |
| 6  | 3.870376  | 0.150620  | 0.091326  |
| 8  | -0.292031 | 0.171866  | 0.236711  |
| 8  | 2.582356  | 0.443078  | -0.001389 |
| 6  | -2.962593 | -0.886373 | -0.302208 |
| 6  | 0.061693  | -0.301538 | -0.389707 |
| 6  | 2.222085  | 2.149758  | -0.986831 |
| 6  | -1.394485 | -0.808742 | -0.562641 |
| 6  | 1.084250  | -0.428861 | 0.948818  |
| 6  | -4.607700 | -0.979005 | -0.874286 |
| 6  | 0.440050  | 1.171619  | -0.111995 |

16

4559.434909 Kcal/mol 197.716060 eV -94.117753 H

MutD\_15\_46.log

|    |           |           |           |
|----|-----------|-----------|-----------|
| 12 | 0.059729  | -0.777857 | -0.819948 |
| 6  | 6.194117  | -0.241591 | 0.959174  |
| 12 | -4.541288 | -2.169182 | 0.073215  |
| 6  | -2.394603 | -2.708660 | -0.119885 |
| 8  | -3.336571 | 4.090765  | -0.111927 |
| 6  | -4.896945 | 1.635106  | 0.708315  |
| 8  | 4.242623  | 1.247610  | -0.970995 |
| 6  | -4.401095 | 2.730474  | 0.283181  |
| 6  | 5.938135  | 0.383389  | 0.605149  |
| 6  | 7.653117  | -0.796496 | 2.322052  |
| 6  | 5.140953  | 0.822872  | -0.150880 |
| 6  | 3.202778  | 0.454444  | -1.294624 |
| 6  | -0.861862 | -2.653773 | -0.681200 |
| 6  | -5.033216 | 0.326073  | 0.867018  |
| 6  | -5.016586 | -0.921224 | 0.989422  |
| 6  | 2.230257  | -0.254370 | -1.550361 |

16

4582.458127 Kcal/mol 198.714442 eV -94.081063 H

Original3D\_6\_3.log

|    |           |           |           |
|----|-----------|-----------|-----------|
| 12 | -0.212099 | -1.205666 | 1.029637  |
| 6  | 2.113136  | 0.809379  | 0.285714  |
| 6  | 4.326135  | 0.387727  | 0.523361  |
| 8  | -1.237320 | 1.815151  | 0.187400  |
| 6  | 2.484329  | -1.263653 | -0.250288 |
| 6  | 3.100170  | 0.120937  | -0.391521 |
| 8  | 0.760821  | -2.288501 | -1.465921 |
| 6  | 1.220585  | -1.354204 | -1.105836 |
| 12 | -2.689119 | 3.294146  | -0.489254 |
| 6  | -2.844951 | -2.009059 | 0.083738  |
| 6  | -3.673989 | -0.986604 | -0.945841 |
| 6  | -3.328877 | -2.084781 | -0.847156 |
| 6  | -0.954389 | 2.159724  | 0.677749  |
| 6  | 0.544392  | 0.386965  | -1.505594 |
| 6  | -1.330492 | -1.267169 | 3.971459  |
| 6  | 4.781718  | 1.554912  | 0.128145  |

16

4708.837298 Kcal/mol 204.194769 eV -93.879665 H

Child\_1\_15.log

|    |           |           |           |
|----|-----------|-----------|-----------|
| 6  | 4.603185  | -2.008149 | -0.175238 |
| 6  | -2.469759 | 3.119593  | -0.538948 |
| 6  | 3.303650  | -2.343924 | -0.137539 |
| 6  | -1.554017 | 2.945213  | -0.168572 |
| 6  | 2.116781  | -1.532709 | -0.052919 |
| 8  | -1.056107 | 1.557335  | -0.112719 |
| 6  | 4.090503  | -0.696502 | -0.114102 |
| 6  | -1.940607 | 0.563750  | -0.688754 |
| 6  | 0.846898  | -1.143054 | 0.013012  |
| 6  | 3.207205  | 3.426464  | 1.060141  |
| 8  | -3.904856 | -2.806001 | 0.173345  |
| 6  | -4.307674 | -0.095367 | 0.573842  |
| 6  | 2.924633  | -0.079655 | 0.007315  |
| 6  | -3.053948 | 0.146632  | 0.047402  |
| 12 | -2.350769 | -1.868875 | 0.160935  |
| 12 | 1.774654  | 1.550173  | -0.114173 |

16

4824.591406 Kcal/mol 209.214348 eV -93.695199 H

MutI\_15\_63.log

|                                                 |           |           |           |                |
|-------------------------------------------------|-----------|-----------|-----------|----------------|
| 6                                               | 2.695219  | -0.165933 | 0.000000  |                |
| 12                                              | -4.754963 | 4.280691  | -0.000000 |                |
| 6                                               | -0.000000 | 1.241673  | -0.000000 |                |
| 6                                               | -3.549820 | 2.768384  | -0.000000 |                |
| 6                                               | -1.688692 | 1.105419  | -0.000000 |                |
| 6                                               | -2.012323 | -0.210245 | -0.000000 |                |
| 6                                               | -5.696764 | 5.795363  | -0.000000 |                |
| 6                                               | 0.738377  | -2.509034 | 0.000000  |                |
| 8                                               | -2.772467 | 1.888058  | -0.000000 |                |
| 6                                               | 6.671661  | -4.246114 | 0.000000  |                |
| 6                                               | -0.546488 | -2.188372 | 0.000000  |                |
| 8                                               | 2.162022  | 0.846254  | -0.000000 |                |
| 12                                              | 3.873106  | -3.159912 | 0.000000  |                |
| 6                                               | 2.015323  | -2.341214 | 0.000000  |                |
| 6                                               | -1.511951 | -1.372155 | 0.000000  |                |
| 6                                               | 5.463102  | -3.765080 | 0.000000  |                |
| 16                                              |           |           |           |                |
| 4970.142458 Kcal/mol 215.526047 eV -93.463248 H |           |           |           | Child_6_20.log |
| 8                                               | 7.126982  | 3.026852  | -0.210775 |                |
| 12                                              | -3.869291 | -2.052693 | -0.260612 |                |
| 6                                               | 6.242401  | 3.618244  | -0.639682 |                |
| 6                                               | -2.065851 | -2.800650 | -0.134225 |                |
| 6                                               | -3.289049 | 5.020639  | 0.696572  |                |
| 6                                               | -4.632853 | -0.158365 | -0.556543 |                |
| 6                                               | 5.825734  | -2.496945 | 0.205943  |                |
| 6                                               | -0.860511 | -2.524631 | -0.051822 |                |
| 6                                               | -2.660871 | 3.912947  | 0.264954  |                |
| 6                                               | -3.981633 | 1.178302  | -0.380973 |                |
| 6                                               | 4.593471  | -2.257458 | 0.316777  |                |
| 6                                               | -3.134920 | 2.236044  | -0.405368 |                |
| 6                                               | 3.408709  | -1.630189 | 0.405759  |                |
| 12                                              | 0.846349  | -1.734277 | -0.090826 |                |
| 6                                               | 2.421997  | -0.955104 | 0.380981  |                |
| 8                                               | -3.992537 | 0.296478  | 0.661152  |                |
| 16                                              |           |           |           |                |
| 5006.781613 Kcal/mol 217.114874 eV -93.404860 H |           |           |           | MutI_18_57.log |
| 6                                               | -2.037527 | -1.700250 | 0.189123  |                |
| 6                                               | 0.762062  | 1.574615  | -0.954566 |                |
| 6                                               | -1.386344 | 0.674900  | -0.458776 |                |
| 6                                               | 0.323693  | -1.309494 | -0.052234 |                |
| 8                                               | -4.278752 | -0.217168 | 0.859877  |                |
| 6                                               | -3.253568 | -1.936427 | 0.490730  |                |
| 8                                               | -0.946899 | -0.908619 | -0.070942 |                |
| 6                                               | -6.715423 | 1.533293  | 0.085356  |                |
| 6                                               | -0.566330 | 1.482248  | -0.848157 |                |
| 12                                              | -3.051273 | 0.713396  | -0.038698 |                |
| 6                                               | 5.138969  | 1.898492  | 1.016191  |                |
| 12                                              | 4.562272  | -1.840054 | -0.058276 |                |
| 6                                               | 1.652665  | -1.599295 | -0.143853 |                |
| 6                                               | 4.816371  | 3.179793  | 1.052449  |                |
| 6                                               | 3.183501  | -1.774896 | -0.221683 |                |
| 6                                               | 2.027469  | 1.731385  | -1.012548 |                |
| 16                                              |           |           |           |                |
| 5104.058026 Kcal/mol 221.333183 eV -93.249840 H |           |           |           | Child_6_51.log |
| 6                                               | 2.993301  | 1.387152  | 0.252139  |                |



|                                                                 |           |           |           |  |  |
|-----------------------------------------------------------------|-----------|-----------|-----------|--|--|
| 12                                                              | -4.571264 | -0.889951 | -0.031728 |  |  |
| 6                                                               | 3.558146  | 0.250405  | 0.004472  |  |  |
| 6                                                               | -4.006445 | 1.050693  | -0.515299 |  |  |
| 6                                                               | 4.361891  | -1.176661 | -0.313487 |  |  |
| 6                                                               | -2.834296 | 1.482061  | -0.550068 |  |  |
| 6                                                               | 2.031451  | 2.179480  | 0.439190  |  |  |
| 12                                                              | -2.283494 | -2.449525 | 0.491175  |  |  |
| 6                                                               | -1.498448 | 1.708404  | -0.526552 |  |  |
| 6                                                               | 2.821509  | -0.973749 | -0.261380 |  |  |
| 6                                                               | -0.335693 | -1.845557 | 0.417728  |  |  |
| 6                                                               | -1.017687 | 4.228251  | 0.916717  |  |  |
| 6                                                               | -0.262295 | 1.678945  | -0.457694 |  |  |
| 8                                                               | 1.586469  | -1.196126 | -0.299774 |  |  |
| 6                                                               | 0.542363  | -0.996007 | 0.214034  |  |  |
| 8                                                               | 3.930321  | -0.524723 | -0.104246 |  |  |
| 16                                                              |           |           |           |  |  |
| 5250.375688 Kcal/mol 227.678126 eV -93.016668 H MutI_13_37.log  |           |           |           |  |  |
| 6                                                               | 4.176618  | 1.886361  | -0.072950 |  |  |
| 6                                                               | -1.455932 | -1.313625 | -0.248570 |  |  |
| 8                                                               | 0.051332  | -0.926347 | -0.446618 |  |  |
| 6                                                               | -7.194714 | 1.293828  | -0.017406 |  |  |
| 6                                                               | 4.779953  | -2.565860 | 0.714387  |  |  |
| 6                                                               | -0.636865 | -2.364927 | -0.350546 |  |  |
| 6                                                               | 3.989651  | 3.146028  | 0.165321  |  |  |
| 8                                                               | 1.116281  | -0.097506 | 0.169435  |  |  |
| 6                                                               | 4.158754  | -0.377407 | -0.772511 |  |  |
| 12                                                              | -4.167061 | 0.408867  | 0.109702  |  |  |
| 6                                                               | -0.291327 | -3.668425 | 0.661919  |  |  |
| 6                                                               | -2.496228 | -0.503330 | -0.000823 |  |  |
| 6                                                               | 3.460763  | 4.297201  | 0.433020  |  |  |
| 12                                                              | -5.513124 | 0.821178  | 0.014123  |  |  |
| 6                                                               | 5.079492  | -1.556581 | -0.089930 |  |  |
| 6                                                               | 4.233388  | 0.631785  | -0.299986 |  |  |
| 16                                                              |           |           |           |  |  |
| 5348.234475 Kcal/mol 231.921690 eV -92.860720 H Child_14_14.log |           |           |           |  |  |
| 8                                                               | 6.023967  | -0.659689 | 0.702553  |  |  |
| 6                                                               | -7.307325 | 0.533646  | 1.507216  |  |  |
| 6                                                               | 4.829980  | -0.500514 | 0.389822  |  |  |
| 8                                                               | -5.870077 | -0.224901 | 0.095707  |  |  |
| 6                                                               | 3.556640  | -0.994948 | 0.099344  |  |  |
| 6                                                               | -4.767130 | -0.325097 | -0.145763 |  |  |
| 6                                                               | 2.462314  | -1.772642 | -0.095181 |  |  |
| 6                                                               | -3.715870 | -0.339264 | -0.464229 |  |  |
| 6                                                               | 3.711976  | 0.418115  | 0.171689  |  |  |
| 6                                                               | -2.211028 | -0.436832 | -0.811659 |  |  |
| 6                                                               | 1.215859  | -2.136215 | -0.190387 |  |  |
| 6                                                               | -0.887642 | 0.123233  | -0.901332 |  |  |
| 6                                                               | 3.034031  | 1.397153  | 0.157788  |  |  |
| 6                                                               | 0.312617  | 0.197201  | -0.736876 |  |  |
| 12                                                              | 2.017731  | 2.591986  | -0.193973 |  |  |
| 12                                                              | -2.237536 | -0.084177 | 0.171584  |  |  |
| 16                                                              |           |           |           |  |  |
| 5571.369854 Kcal/mol 241.597768 eV -92.505131 H MutI_13_53.log  |           |           |           |  |  |
| 8                                                               | 0.086686  | -1.952863 | -0.941399 |  |  |
| 6                                                               | -3.480916 | 2.167034  | -0.672693 |  |  |

|    |           |           |           |
|----|-----------|-----------|-----------|
| 12 | 0.348737  | 1.340778  | -0.087973 |
| 6  | -2.100517 | 0.563079  | 1.019363  |
| 6  | -1.780644 | -2.501429 | 0.369232  |
| 6  | 8.582983  | 0.262318  | 0.607953  |
| 6  | -3.271077 | 0.180448  | 1.688388  |
| 6  | -2.784496 | -2.350224 | 1.139048  |
| 6  | -0.882906 | -1.553839 | -0.149927 |
| 6  | 1.907809  | 0.723140  | -1.235746 |
| 8  | -4.511813 | 1.841037  | -1.373678 |
| 6  | 9.803964  | 0.176398  | 0.906067  |
| 6  | -1.240065 | -0.128259 | 0.352792  |
| 6  | -3.262887 | -1.151532 | 1.612894  |
| 12 | 1.614245  | -1.099116 | -1.755000 |
| 6  | 0.482958  | 3.278645  | 1.135344  |

16

5638.031889 Kcal/mol 244.488511 eV -92.398898 H

Original3D\_17\_6.log

|    |           |           |           |
|----|-----------|-----------|-----------|
| 6  | -4.010723 | -0.117744 | 0.790270  |
| 6  | -4.064188 | 0.176499  | -0.961837 |
| 6  | -4.277833 | 1.327810  | 0.397093  |
| 6  | -1.203986 | 1.214177  | -0.531272 |
| 6  | -0.331230 | 0.206301  | -0.518333 |
| 12 | 2.010363  | -0.000031 | -0.650184 |
| 6  | -3.162836 | -1.097379 | 0.485648  |
| 6  | -1.207037 | 2.478610  | -0.396833 |
| 8  | 2.310134  | -2.912466 | -1.551076 |
| 6  | -5.415599 | 0.498616  | 0.130957  |
| 6  | -3.962478 | -1.425651 | -0.701700 |
| 8  | 0.101893  | -0.780087 | 1.379889  |
| 6  | 1.369301  | -1.311870 | 1.898668  |
| 12 | 4.520199  | -0.063547 | 0.971252  |
| 6  | 5.008945  | 1.052086  | -1.030168 |
| 6  | 4.980503  | 2.049105  | 0.023620  |

16

6651.493749 Kcal/mol 288.436432 eV -90.783843 H

Child\_10\_28.log

|    |           |           |           |
|----|-----------|-----------|-----------|
| 6  | -5.797448 | -1.067650 | -0.212284 |
| 6  | 3.596345  | 0.548308  | -0.307869 |
| 12 | -3.881095 | 0.092996  | -0.365542 |
| 6  | 3.452180  | -0.764873 | -0.310156 |
| 6  | -1.313474 | 2.398729  | 0.798109  |
| 6  | 3.210338  | 1.758759  | -0.277244 |
| 6  | 0.004444  | -0.625693 | 1.213271  |
| 6  | 2.734878  | -1.806641 | -0.343576 |
| 6  | 0.981897  | -1.311498 | 1.705732  |
| 6  | 2.284611  | 2.692663  | -0.211917 |
| 6  | -1.894021 | -0.725830 | -0.377658 |
| 8  | 1.849722  | -2.704728 | -0.366103 |
| 8  | -1.862028 | 2.195049  | -0.114940 |
| 6  | 1.156328  | 3.338589  | -0.143929 |
| 6  | -0.878635 | -0.145451 | 0.120420  |
| 12 | 0.120577  | -1.897915 | -0.140211 |

16

6684.982840 Kcal/mol 289.888658 eV -90.730474 H

Original1D\_0\_2.log

|   |          |          |           |
|---|----------|----------|-----------|
| 6 | 0.000000 | 0.000000 | -9.752148 |
|---|----------|----------|-----------|

|                                                                |           |           |            |
|----------------------------------------------------------------|-----------|-----------|------------|
| 6                                                              | 0.000000  | 0.000000  | -8.478796  |
| 12                                                             | 0.000000  | 0.000000  | -7.013548  |
| 6                                                              | 0.000000  | 0.000000  | -11.074450 |
| 6                                                              | 0.000000  | 0.000000  | -4.442061  |
| 8                                                              | 0.000000  | 0.000000  | -3.131038  |
| 6                                                              | 0.000000  | 0.000000  | -1.827251  |
| 6                                                              | 0.000000  | 0.000000  | -0.494015  |
| 6                                                              | 0.000000  | 0.000000  | 0.805852   |
| 8                                                              | 0.000000  | 0.000000  | 2.142076   |
| 6                                                              | 0.000000  | 0.000000  | 3.456504   |
| 6                                                              | 0.000000  | 0.000000  | 4.736830   |
| 6                                                              | 0.000000  | 0.000000  | 6.083547   |
| 6                                                              | 0.000000  | 0.000000  | 7.343737   |
| 12                                                             | 0.000000  | 0.000000  | 8.811932   |
| 6                                                              | 0.000000  | 0.000000  | 11.364099  |
| 16                                                             |           |           |            |
| 6967.118943 Kcal/mol 302.123253 eV -90.280861 H MutI_6_67.log  |           |           |            |
| 6                                                              | -6.643827 | 3.251745  | 0.812957   |
| 6                                                              | -1.978159 | -1.084783 | -0.485274  |
| 6                                                              | -7.511597 | -2.563115 | 0.069557   |
| 6                                                              | 5.073856  | -2.551573 | 0.792400   |
| 6                                                              | 4.192101  | 4.030877  | -0.547407  |
| 12                                                             | 0.938803  | 0.784655  | -0.897023  |
| 8                                                              | 5.282985  | -3.568036 | 1.168604   |
| 6                                                              | 4.692475  | 0.084933  | -0.042127  |
| 6                                                              | 2.735940  | 1.762545  | -0.214786  |
| 6                                                              | 5.013634  | -1.187926 | 0.401215   |
| 6                                                              | -0.904931 | -0.386724 | -0.617380  |
| 12                                                             | -5.174666 | -2.751443 | -0.420099  |
| 6                                                              | 3.800353  | 1.184812  | -0.065535  |
| 6                                                              | -3.101672 | -1.733652 | -0.495322  |
| 6                                                              | 3.694286  | 2.875279  | -0.246768  |
| 8                                                              | -5.726035 | 3.756406  | 1.285931   |
| 16                                                             |           |           |            |
| 7274.851817 Kcal/mol 315.467830 eV -89.790458 H                |           |           |            |
| OriginalID_0_1.log                                             |           |           |            |
| 8                                                              | 0.000000  | 0.000000  | -6.804192  |
| 8                                                              | 0.000000  | 0.000000  | -8.165177  |
| 6                                                              | 0.000000  | 0.000000  | -9.506002  |
| 6                                                              | 0.000000  | 0.000000  | -10.795947 |
| 6                                                              | 0.000000  | 0.000000  | -5.508607  |
| 6                                                              | 0.000000  | 0.000000  | -4.233727  |
| 6                                                              | 0.000000  | 0.000000  | -2.892916  |
| 6                                                              | 0.000000  | 0.000000  | -1.630861  |
| 12                                                             | 0.000000  | 0.000000  | -0.166601  |
| 6                                                              | 0.000000  | 0.000000  | 2.402788   |
| 6                                                              | 0.000000  | 0.000000  | 3.707385   |
| 6                                                              | 0.000000  | 0.000000  | 5.027270   |
| 6                                                              | 0.000000  | 0.000000  | 6.336532   |
| 6                                                              | 0.000000  | 0.000000  | 7.611261   |
| 12                                                             | 0.000000  | 0.000000  | 9.076004   |
| 6                                                              | 0.000000  | 0.000000  | 11.623175  |
| 16                                                             |           |           |            |
| 7748.879703 Kcal/mol 336.023651 eV -89.035045 H MutI_14_73.log |           |           |            |
| 6                                                              | -0.079093 | -2.897314 | -0.134037  |

|                                                                 |           |           |           |  |  |
|-----------------------------------------------------------------|-----------|-----------|-----------|--|--|
| 6                                                               | -4.659159 | 2.175200  | 0.020653  |  |  |
| 6                                                               | -3.546978 | -2.372803 | -0.421097 |  |  |
| 6                                                               | -1.040077 | -2.069957 | 0.064851  |  |  |
| 6                                                               | -4.353941 | 0.063980  | 0.186653  |  |  |
| 12                                                              | 6.161143  | 0.961027  | 0.475760  |  |  |
| 6                                                               | -2.143522 | 1.555759  | -0.060151 |  |  |
| 6                                                               | -3.545135 | 1.319792  | 0.025445  |  |  |
| 6                                                               | -2.118897 | -1.261823 | 0.175624  |  |  |
| 6                                                               | 2.991724  | 0.114716  | -0.155359 |  |  |
| 6                                                               | -3.545897 | -1.113460 | 0.097491  |  |  |
| 12                                                              | 1.824284  | -1.811434 | 0.163092  |  |  |
| 8                                                               | 1.650327  | 0.157081  | -0.217714 |  |  |
| 8                                                               | -5.591229 | 2.887712  | 0.018871  |  |  |
| 6                                                               | 7.571926  | 2.259788  | -0.568726 |  |  |
| 6                                                               | 3.752730  | -0.132787 | -0.243929 |  |  |
| 16                                                              |           |           |           |  |  |
| 8355.321673 Kcal/mol 362.321497 eV -88.068618 H MutD_1_72.log   |           |           |           |  |  |
| 6                                                               | 1.126964  | 2.101533  | -1.681929 |  |  |
| 6                                                               | -0.221785 | -0.160851 | -0.962064 |  |  |
| 6                                                               | -0.073405 | -1.124146 | 1.521355  |  |  |
| 8                                                               | -0.882367 | -0.265866 | 2.246160  |  |  |
| 12                                                              | 2.844807  | -2.028266 | 0.990458  |  |  |
| 6                                                               | -1.791898 | -2.029175 | 0.150801  |  |  |
| 6                                                               | -2.776002 | -0.095798 | -1.847659 |  |  |
| 8                                                               | -0.674992 | -2.329980 | -0.699620 |  |  |
| 6                                                               | -1.078504 | 0.395573  | -1.889482 |  |  |
| 6                                                               | -2.077787 | -0.735978 | -0.422074 |  |  |
| 6                                                               | 2.548687  | 1.015056  | -1.390347 |  |  |
| 6                                                               | -0.822766 | -0.983660 | -1.230147 |  |  |
| 6                                                               | -2.890361 | 3.030649  | 1.894883  |  |  |
| 6                                                               | 3.368201  | 1.479880  | -0.410672 |  |  |
| 6                                                               | 2.270690  | 1.667029  | 0.389960  |  |  |
| 12                                                              | -0.597584 | 1.478774  | 0.917203  |  |  |
| 16                                                              |           |           |           |  |  |
| 8632.377436 Kcal/mol 374.335787 eV -87.627101 H MutD_2_78.log   |           |           |           |  |  |
| 8                                                               | 2.388915  | 1.294035  | 0.925394  |  |  |
| 6                                                               | 0.695756  | 3.296034  | -1.330564 |  |  |
| 6                                                               | 0.718050  | -0.617380 | 0.082733  |  |  |
| 12                                                              | -4.065296 | -0.191031 | 1.329382  |  |  |
| 12                                                              | -3.293507 | -1.013236 | -1.467572 |  |  |
| 6                                                               | 0.785302  | -2.940955 | -0.205490 |  |  |
| 6                                                               | -0.481156 | -3.174228 | -0.342740 |  |  |
| 8                                                               | -1.205600 | 0.929816  | -0.104942 |  |  |
| 6                                                               | 1.497537  | -1.754899 | -0.055778 |  |  |
| 6                                                               | 2.581642  | 1.287673  | -0.119080 |  |  |
| 6                                                               | 2.864496  | -1.124205 | -0.185932 |  |  |
| 6                                                               | 2.742248  | 0.036006  | -0.921755 |  |  |
| 6                                                               | -0.272997 | 0.164285  | 0.015518  |  |  |
| 6                                                               | -3.766547 | 2.759737  | 1.045966  |  |  |
| 6                                                               | 3.859884  | -1.004292 | 2.049889  |  |  |
| 6                                                               | 1.915637  | 2.515624  | -0.850321 |  |  |
| 16                                                              |           |           |           |  |  |
| 10241.170539 Kcal/mol 444.099747 eV -85.063324 H Child_2_37.log |           |           |           |  |  |
| 6                                                               | -4.251322 | -0.729929 | -0.527340 |  |  |
| 12                                                              | 3.880566  | -1.654259 | 1.363207  |  |  |

|              |           |            |           |                             |
|--------------|-----------|------------|-----------|-----------------------------|
| 6            | -2.978649 | -0.870262  | -0.609523 |                             |
| 8            | 3.394070  | 0.200665   | -0.566971 |                             |
| 12           | -3.198408 | 0.197743   | 1.455759  |                             |
| 6            | 2.102373  | -0.378023  | 1.034296  |                             |
| 6            | -1.554076 | -0.826175  | -0.588330 |                             |
| 6            | 2.058444  | 0.217757   | -0.202021 |                             |
| 8            | 0.233160  | 3.924460   | -0.963279 |                             |
| 6            | -0.441711 | -0.560911  | -1.288512 |                             |
| 6            | -1.676660 | 1.233862   | 2.728554  |                             |
| 6            | 0.570621  | -0.010782  | -2.190064 |                             |
| 6            | -0.635940 | -0.632332  | 0.412520  |                             |
| 6            | -0.913590 | -4.037429  | -1.298272 |                             |
| 6            | 0.772437  | 3.373761   | -0.093674 |                             |
| 6            | 0.747448  | 0.633329   | -0.975232 |                             |
| 16           |           |            |           |                             |
| 10402.779092 | Kcal/mol  | 451.107766 | eV        | -84.805784 H Child_2_62.log |
| 6            | 8.394469  | 0.719837   | -0.364906 |                             |
| 12           | -4.697645 | -2.058419  | -0.158519 |                             |
| 6            | 7.148471  | 0.398953   | -0.275250 |                             |
| 6            | -2.620989 | -1.599112  | -0.069931 |                             |
| 6            | 5.895806  | 0.114764   | -0.213142 |                             |
| 6            | 0.054738  | -1.738699  | -0.100640 |                             |
| 6            | 4.671742  | -0.124237  | -0.153799 |                             |
| 6            | -3.415268 | -0.358987  | 0.133366  |                             |
| 6            | 3.417143  | -0.192164  | -0.057240 |                             |
| 8            | -1.302133 | -1.218551  | -0.029083 |                             |
| 12           | -1.216738 | 1.126066   | 0.705573  |                             |
| 6            | -3.373722 | 1.099549   | 0.355449  |                             |
| 6            | 2.197037  | -0.138353  | 0.085778  |                             |
| 6            | 0.323598  | 1.680601   | 0.429864  |                             |
| 6            | 0.832014  | -0.217442  | 0.285009  |                             |
| 8            | -7.470073 | 2.883550   | -0.832414 |                             |
| 16           |           |            |           |                             |
| 11579.273498 | Kcal/mol  | 502.125456 | eV        | -82.930920 H Child_8_25.log |
| 6            | 1.611518  | -3.166600  | -0.244155 |                             |
| 6            | 0.518771  | 2.981781   | -0.054884 |                             |
| 6            | 0.681608  | -2.265285  | -0.160108 |                             |
| 6            | -0.816625 | 2.870596   | -0.012464 |                             |
| 6            | 2.265903  | -1.737346  | -0.169658 |                             |
| 6            | 1.747948  | 2.736879   | -0.108283 |                             |
| 12           | 4.419012  | -0.716012  | 0.532057  |                             |
| 6            | -1.978680 | 2.392065   | 0.007738  |                             |
| 6            | -0.515379 | -1.513177  | -0.075885 |                             |
| 6            | 2.908132  | 2.111014   | -0.169004 |                             |
| 6            | 2.311430  | -0.443285  | -0.101461 |                             |
| 12           | -3.095716 | 0.540611   | 0.000210  |                             |
| 6            | -1.737097 | -1.260841  | -0.135702 |                             |
| 6            | 3.583533  | 0.990862   | -0.160678 |                             |
| 8            | -7.549196 | -0.207919  | 0.261498  |                             |
| 8            | -2.371545 | -2.301476  | -0.021493 |                             |
| 16           |           |            |           |                             |
| 12033.187622 | Kcal/mol  | 521.809060 | eV        | -82.207561 H MutI_18_37.log |
| 6            | -5.375702 | -1.932019  | -0.272600 |                             |
| 6            | 1.231346  | -0.113279  | 0.482386  |                             |
| 6            | -5.841096 | -0.697197  | -0.233115 |                             |

|              |           |            |           |                             |
|--------------|-----------|------------|-----------|-----------------------------|
| 6            | -4.095391 | -1.879504  | -0.131087 |                             |
| 6            | 6.140899  | 0.263330   | 0.110772  |                             |
| 6            | 9.591273  | -0.039958  | -0.711537 |                             |
| 6            | -3.490528 | 2.304179   | -0.118869 |                             |
| 6            | 5.015175  | 0.188400   | 0.158005  |                             |
| 12           | 8.044528  | 0.031276   | -0.108432 |                             |
| 6            | -4.228525 | 0.281385   | 0.579182  |                             |
| 6            | -6.413643 | 0.472945   | -0.122854 |                             |
| 8            | -2.985561 | -1.895242  | -0.066341 |                             |
| 6            | 3.820874  | 0.123537   | 0.267954  |                             |
| 6            | 2.610129  | 0.063613   | 0.391925  |                             |
| 12           | -5.199277 | 2.011339   | -0.215827 |                             |
| 8            | -0.505924 | -0.445252  | 0.252608  |                             |
| 16           |           |            |           |                             |
| 12208.670167 | Kcal/mol  | 529.418713 | eV        | -81.927912 H Child_3_17.log |
| 12           | -4.284311 | -1.807482  | 0.168965  |                             |
| 12           | 3.988847  | 0.302564   | -0.510930 |                             |
| 6            | -3.175052 | -0.259250  | -0.424268 |                             |
| 8            | 3.988787  | -1.571467  | 0.010386  |                             |
| 8            | -0.018110 | 4.057156   | 1.305548  |                             |
| 6            | 2.279025  | 1.297948   | -0.509811 |                             |
| 6            | -2.314527 | -1.211684  | 0.101928  |                             |
| 6            | 2.774103  | -1.875672  | 0.212501  |                             |
| 6            | -2.256748 | 2.178757   | -1.156095 |                             |
| 6            | 1.220149  | 1.083683   | 0.086294  |                             |
| 6            | -0.405303 | 0.499333   | 0.476002  |                             |
| 6            | 1.535609  | -1.987622  | 0.347744  |                             |
| 6            | -2.780128 | 1.018959   | -0.647531 |                             |
| 6            | 0.254510  | -1.691063  | 0.411432  |                             |
| 6            | -0.869763 | -1.004206  | 0.325874  |                             |
| 6            | -0.965180 | 1.646401   | -0.294718 |                             |
| 16           |           |            |           |                             |
| 22726.870256 | Kcal/mol  | 985.531614 | eV        | -65.166080 H MutI_17_71.log |
| 6            | -1.361118 | 1.959846   | 0.638201  |                             |
| 6            | -0.934977 | -0.389240  | -0.033655 |                             |
| 6            | 1.557113  | 3.071286   | -1.243599 |                             |
| 6            | 6.661897  | -0.693789  | -0.175698 |                             |
| 6            | -2.949981 | -1.682898  | -0.766722 |                             |
| 6            | -1.683232 | 0.756267   | 0.492105  |                             |
| 12           | 5.459481  | -1.072430  | 1.237786  |                             |
| 8            | -3.426701 | 0.887253   | 1.060593  |                             |
| 6            | 1.748064  | -0.336697  | 0.218982  |                             |
| 6            | -5.482736 | -1.101117  | -0.169023 |                             |
| 6            | -4.196439 | -1.669002  | -0.688186 |                             |
| 6            | 0.460258  | -0.419378  | -0.079399 |                             |
| 12           | 0.348083  | 2.273343   | -0.229416 |                             |
| 6            | -5.915685 | -0.416427  | 0.437988  |                             |
| 6            | 7.260948  | -0.729458  | -1.231922 |                             |
| 8            | -1.657728 | -1.450666  | -0.622452 |                             |
